# Supplementary material for: An epigenetic biomarker of aging for lifespan and healthspan
Source: Aging (Albany NY). 2018 Apr 17;10(4):573–91. doi: 10.18632/aging.101414 (PMC5940111; doi:10.18632/aging.101414)
Supplement: Supplement 2 [file aging-10-101414-s002.csv]

CpG	Chromosome	Map Info	Gene Symbol	Entrez ID	Weight	Univariate Age Correlation	Horvath Overlap	Hannum Overlap
Intercept					60.664
cg15611364	3	25806427	OXSM	54995	63.12415047	0.003807203	No	No
cg17605084	12	53177758	HEM1	3071	-44.00939313	-0.02916914	No	No
cg26382071	17	6485627	TXNL5	84817	40.42085373	0.002996738	No	No
cg12743894	11	30301513	C11orf46	120534	36.7881845	-0.008386638	No	No
cg19287114	9	107046432	SLC44A1	23446	-36.49384395	-0.118250325	No	No
cg12985418	18	17574536	MIB1	57534	-35.90008808	-0.073728082	Yes	No
cg19398783	4	38460973	TLR10	81793	35.83308293	-0.073112025	No	No
cg15963417	12	101835430	PAH	5053	-34.69842764	0.049223907	No	No
cg27187881	22	40796291	NAGA	4668	-33.54555855	-0.475052242	No	No
cg09892203	17	62391602	CACNG4	27092	-33.4823461	0.130255717	No	No
cg00943950	5	133734820	UBE2B	7320	33.47697933	0.01756517	No	No
cg18996776	3	161766697	KPNA4	3840	33.05057141	-0.020111786	No	No
cg16340918	10	94342680	KIF11	3832	32.14665692	-0.02116097	No	No
cg23832061	6	109868360	PPIL6	285755	-31.90246973	-0.098748937	No	No
cg22736354	6	18230698	NHLRC1	378884	31.84219355	0.76321829	Yes	Yes
cg04084157	7	100595769	VGF	7425	31.62165709	0.507580445	Yes	No
cg07265300	2	24199504	PFN4	375189	28.3980076	-0.007232905	No	No
cg02503970	8	134653327	ST3GAL1	6482	25.58514041	-0.066662197	No	No
cg11426590	1	33420441	TRIM62	55223	-24.78579343	0.022292531	No	No
cg23710218	8	72919210	MSC	9242	24.15870289	0.238845216	No	No
cg02802055	9	131636915	USP20	10868	-24.11715679	-0.089158426	No	No
cg13631913	1	9522932	MGC4399	84275	23.83805501	-0.018826172	No	No
cg06493994	6	25760581	SCGN	10590	23.37207957	0.66792084	Yes	Yes
cg24304712	1	242691408	C1orf101	257044	23.3003573	-0.076390751	No	No
cg01131735	17	37221945	SC65	10609	-22.91466682	-0.040692833	No	No
cg24208206	3	46011575	FYCO1	79443	22.54068526	0.105047325	No	No
cg01930621	19	57100162	ZNF649	65251	-21.78792705	0.051575263	No	No
cg19104072	11	65871352	B3GNT6	11041	-21.59866911	-0.02392455	No	No
cg07850604	14	35073194	INSM2	84684	21.31021579	0.382446492	No	No
cg27493997	1	154942016	CRABP2	1382	-21.2007229	0.023697971	No	No
cg14281160	12	64811210	C12orf31	84298	21.11147672	0.000372527	No	No
cg12247247	17	34263387	RPL23	9349	-20.75342001	-0.064514151	No	No
cg08331960	16	2016598	SLC9A3R2	9351	-20.70742942	-0.339555711	Yes	No
cg17726022	12	44948688	SLC38A1	81539	20.18800473	-0.030791432	No	No
cg19722847	12	30740381	IPO8	10526	-20.14577056	-0.646780271	Yes	Yes
cg21801378	15	70399179	BRUNOL6	60677	19.61967861	0.58373185	Yes	No
cg03977782	3	114734370	SIDT1	54847	19.45230678	-0.046774361	No	No
cg03929796	3	52206880	ALAS1	211	-19.41008226	-0.433939383	No	No
cg01254459	14	52243641	PSMC6	5706	19.18438139	-0.003917566	No	No
cg09548179	16	2510493	AMDHD2	51005	-19.0323049	-0.034089519	No	No
cg09556292	14	102128568	RCOR1	23186	-18.61940178	-0.040351714	No	No
cg17896249	16	65783488	E2F4	1874	18.0100431	-0.007772862	No	No
cg26091688	16	3225404	ZNF200	7752	-17.94903039	-0.008588396	No	No
cg17009433	9	6635686	GLDC	2731	17.3157834	0.379987519	No	No
cg06690548	4	139382258	SLC7A11	23657	-17.31209095	-0.092906321	No	No
cg26815229	1	60165521	CYP2J2	1573	-17.14738745	-0.283777465	No	No
cg15447479	7	128616001	SMO	6608	17.06265852	0.1555464	No	No
cg27015931	16	21919905	MGC50721	255762	-16.80473407	-0.58471576	Yes	No
cg13550877	14	76959735	C14orf148	122945	-16.79028681	-0.050296699	No	No
cg05492270	11	71317733	RNF121	55298	-16.73113119	-0.018817627	No	No
cg22594309	1	200946127	SYT2	127833	16.6352922	0.241296857	No	No
cg08896629	19	10352577	TYK2	7297	-16.3038063	-0.033143293	No	No
cg11237115	3	184836116	KLHL24	54800	-16.243299	-0.021390303	No	No
cg04736140	1	166371941	GPR161	23432	-16.11768623	-0.064215149	No	No
cg06533629	7	130069910	KLF14	136259	16.05623965	0.319922906	No	No
cg25881193	6	26491276	BTN2A2	10385	-15.99899499	-0.006905842	No	No
cg03535648	12	101116609	PMCH	5367	-15.95141109	0.041963371	No	No
cg27367952	2	218929830	MGC50811	375307	-15.82375956	-0.252899873	No	No
cg11600161	11	66928161	TBC1D10C	374403	-15.57182248	-0.039470512	No	No
cg19345165	11	47557253	NDUFS3	4722	-15.25553584	-0.092571488	No	No
cg15881088	3	51397414	ARMET	7873	-15.21848681	-0.087929134	No	No
cg21296230	15	30797828	GREM1	26585	15.06457901	0.661584589	No	Yes
cg14175438	7	120823965	FAM3C	10447	-14.9517935	-0.586983737	Yes	No
cg13409216	10	70609993	SUPV3L1	6832	-14.48609953	-0.061804129	No	No
cg04424621	6	27209920	HIST1H2BJ	8970	-14.44777739	-0.674341429	No	No
cg01137065	17	78070299	FOXK2	3607	14.37377079	-0.00263297	No	No
cg13656360	11	117812992	MLL	4297	14.36406636	-0.003232743	No	No
cg05316065	8	130868189	MLZE	56169	-14.22870517	-0.447530182	No	No
cg13509147	19	4104603	CREB3L3	84699	14.22126208	0.0185607	No	No
cg13449372	10	102738683	MRPL43	84545	-14.12054745	0.013242717	No	No
cg10654016	12	64810678	C12orf31	84298	13.83949625	0.036639082	No	No
cg18693704	16	65288814	CMTM4	146223	-13.80959079	-0.324212179	No	No
cg13218906	20	62357195	PCMTD2	55251	-13.68132768	-0.141082969	No	No
cg25428451	1	87370132	LOC339524	339524	-13.6572112	-0.112796592	No	No
cg00462994	17	39437481	NAGS	162417	13.58737822	0.497887892	No	No
cg03340261	6	135417593	HBS1L	10767	13.57369508	0.052111622	No	No
cg00261781	2	20075998	MATN3	4148	13.39937728	0.219992666	No	No
cg13514050	20	32924246	GGTL3	2686	-13.34104874	0.032627188	No	No
cg20066677	12	131934493	CHFR	55743	13.32700255	0.328594137	No	No
cg18267374	8	24827178	NEF3	4741	13.32614877	0.618976117	No	No
cg24407308	11	46311573	DGKZ	8525	-12.95513488	0.009204313	No	No
cg10636246	1	157313597	AIM2	9447	-12.95489	-0.256167392	No	No
cg15569512	14	103099420	C14orf153	84334	-12.95093372	-0.01245449	No	No
cg07817698	16	70600426	DHODH	1723	12.90897644	-0.02855534	No	No
cg16854606	19	12941743	DAND5	199699	12.74522356	0.119664275	No	No
cg12265604	16	67697069	HAS3	3038	12.6784476	0.164599315	No	No
cg14689355	2	148318869	ACVR2A	92	-12.59980654	-0.076204677	No	No
cg01651821	2	99163790	LOC129531	129531	12.43450304	0.020840181	No	No
cg14159818	20	3697519	C20orf27	54976	-12.18111487	0.057641429	No	No
cg20162159	3	49942069	MON1A	84315	-12.17957599	-0.035579674	No	No
cg00230271	4	107456632	MGC16169	93627	-12.15471329	-0.024102322	No	No
cg19008809	3	53055722	SFMBT1	51460	12.12001927	0.259987429	Yes	No
cg09809672	1	234624305	EDARADD	128178	-12.09921682	-0.644366962	Yes	Yes
cg13994175	3	47299528	KIF9	64147	12.07884157	-0.075766783	No	No
cg03172991	19	12966728	NFIX	4784	-11.96946328	-0.384880345	No	No
cg00194146	6	13596383	GFOD1	54438	-11.88629118	-0.332957648	No	No
cg10225525	14	64946618	FUT8	2530	11.81083061	-0.056397434	No	No
cg08487374	7	99914498	TSC22D4	81628	11.67344393	-0.059329845	No	No
cg01450842	2	48649717	SALF	286749	-11.65425604	-0.096348817	No	No
cg18117393	1	181027885	NPL	80896	11.53232389	0.043983375	No	No
cg08067365	1	938756	G1P2	9636	-11.51984975	-0.063340021	No	No
cg17038116	1	153800029	ASH1L	55870	-11.16561286	-0.045025778	No	No
cg26665419	6	107455983	C6orf203	51250	-11.15430006	-0.07305323	No	No
cg20173259	19	54212742	LHB	3972	11.11358119	-0.024850475	No	No
cg08899632	20	50242407	ZFP64	55734	11.08380298	-0.112816342	No	No
cg04528819	7	130068855	KLF14	136259	11.07259285	0.573728073	Yes	No
cg11177450	3	198078873	SENP5	205564	-10.94667271	-0.134289454	No	No
cg06908778	10	22674608	SPAG6	9576	10.86511161	0.434412195	No	No
cg25092328	20	31771780	PXMP4	11264	10.80113727	-0.004929575	No	No
cg10922280	16	66591728	DPEP2	64174	10.79008118	0.336792482	No	No
cg04836038	13	98537383	DOCK9	23348	10.65458827	0.406796392	Yes	No
cg02229946	2	113386383	IL1F7	27178	10.5122237	-0.092333478	No	No
cg12269343	14	81070186	SEL1L	6400	10.4580988	0.019383295	No	No
cg05294243	19	56260918	KLK13	26085	10.43369407	0.316276914	Yes	No
cg01211097	16	83290470	USP10	9100	-10.27522152	-0.28320868	No	No
cg08529529	13	30207799	ALOX5AP	241	-10.22704896	-0.214185605	No	No
cg10158181	4	2935639	GRK4	2868	-10.1880066	-0.040288455	No	No
cg26357744	3	50349308	RASSF1	11186	-10.00204065	-0.264065583	No	No
cg27655905	11	67795364	C11orf24	53838	9.950424372	0.020447234	No	No
cg06189653	5	176805938	PRR7	80758	-9.928634297	-0.008491692	No	No
cg17641104	12	95318378	PCTK2	5128	-9.926053105	-0.054598893	No	No
cg22495124	17	62303990	CACNG5	27091	9.772363822	0.000513013	No	No
cg17129388	17	44926985	NGFR	4804	9.679594816	-0.057253065	No	No
cg19556572	9	116196522	AKNA	80709	9.567877534	0.37271562	No	No
cg25136687	6	111911879	REV3L	5980	-9.522144355	-0.086316237	No	No
cg15344028	2	204509755	ICOS	29851	-9.504209291	-0.134186604	No	No
cg05270634	17	38430971	RND2	8153	9.458683059	0.172182668	No	No
cg26866325	4	75139423	PPBPL2	10895	9.372871086	0.160968514	No	No
cg25256723	1	167822568	F5	2153	-9.36844987	-0.564786393	No	No
cg03112869	3	48388773	FBXW12	285231	9.309963576	-0.030352697	No	No
cg07929310	16	83618562	KIAA0513	9764	-9.267771972	-0.038010303	No	No
cg16085042	12	102848087	HSP90B1	7184	-9.058118831	-0.096719707	No	No
cg05759269	6	36754231	CDKN1A	1026	-9.047212407	-0.082366774	No	No
cg14754581	3	46423757	CCRL2	9034	8.9044998	0.216105539	No	No
cg01221637	20	30535605	C20orf112	140688	-8.838557811	-0.052180795	No	No
cg12261786	10	88717810	C10orf116	10974	-8.80006302	-0.476556474	No	No
cg17133388	3	123585417	C3orf28	26355	-8.786659598	-0.482489566	No	No
cg13120519	19	6323660	ALKBH7	84266	-8.761639169	-0.093939155	No	No
cg01441777	22	37044362	CSNK1E	1454	-8.741688217	-0.339974095	No	No
cg11233384	1	19488289	AKR7A3	22977	-8.702162118	-0.037089491	No	No
cg22971191	13	102517707	SLC10A2	6555	8.613889336	0.185725685	No	No
cg00845900	7	129718965	CPA4	51200	-8.58936172	-0.020677711	No	No
cg04007936	16	8861518	CARHSP1	23589	-8.441092863	0.025950663	No	No
cg26212924	8	145222427	CYC1	1537	-8.269454924	-0.164547182	No	No
cg13042288	15	88150983	ANPEP	290	-8.160794723	-0.087706545	No	No
cg14473016	22	34267441	RASD2	23551	-8.146118724	-0.076047244	No	No
cg02976574	3	173312987	FNDC3B	64778	8.057451538	0.081679552	No	No
cg05851163	18	63334546	C18orf4	92126	-8.056495421	0.047157539	No	No
cg17526300	10	16518925	PTER	9317	8.038276564	0.043012629	No	No
cg16173067	20	1257722	SDCBP2	27111	8.01275733	0.052228388	No	No
cg15811427	19	56946034	FPR1	2357	-8.009320965	-0.286459515	No	No
cg14916213	11	66162394	RBM4	5936	7.981658933	-0.026104941	No	No
cg04014889	15	21441686	MAGEL2	54551	-7.924579894	0.003214951	No	No
cg22947000	16	79829782	BCMO1	53630	-7.872570922	-0.515313628	Yes	No
cg25769980	4	38507297	TLR6	10333	-7.808838536	-0.065473433	No	No
cg02228185	17	3326317	ASPA	443	-7.785341156	-0.650280567	No	No
cg03565081	14	22548810	C14orf93	60686	7.763007186	0.208726	No	No
cg15966757	12	242520	SLC6A13	6540	-7.746394111	0.016708735	No	No
cg09480837	10	95779491	PLCE1	51196	-7.741831686	-0.19119692	No	No
cg13564075	17	24302936	PHF12	57649	-7.65214571	-0.011500533	No	No
cg03991512	16	73707957	LDHD	197257	-7.60434303	-0.361159077	No	No
cg20761322	15	76210619	CIB2	10518	7.473261917	0.286774616	Yes	No
cg23376526	1	152014742	SLC27A3	11000	-7.470945638	-0.109821613	No	No
cg02631957	5	122875865	CSNK1G3	1456	-7.435453213	-0.075967456	No	No
cg16933388	3	49567533	BSN	8927	7.416346316	0.429217878	No	No
cg21099326	8	27224508	TRIM35	23087	-7.319261619	-0.039391536	No	No
cg26096837	11	69229155	FGF19	9965	7.269147318	0.125507722	No	No
cg26394737	14	22136921	ABHD4	63874	7.25927706	0.036056316	No	No
cg01519742	4	6252992	JAKMIP1	152789	7.247589771	0.195609234	No	No
cg02016419	17	15185962	TEKT3	64518	7.246984432	0.264393412	No	No
cg07654934	3	159873023	LXN	56925	-7.183441358	0.114802748	No	No
cg24125648	15	41879898	HYPK	25764	7.120190402	0.232366273	No	No
cg14747225	16	43024	POLR3K	51728	7.024834167	0.004859995	No	No
cg18003795	22	16070463	CECR1	51816	-6.99391822	-0.034748251	No	No
cg05087948	11	66092773	CTSF	8722	-6.991225132	-0.012393631	No	No
cg02151301	20	29565446	HM13	81502	-6.962548699	-0.511850751	No	No
cg05532892	11	14623012	PSMA1	5682	6.729463914	0.104720217	No	No
cg08035942	18	71050325	ZADH2	284273	-6.589880588	-0.04850144	No	No
cg07484827	11	3649733	CHRNA10	57053	6.581498688	-0.021359895	No	No
cg17749443	9	114859011	ZFP37	7539	6.468578944	0.261908148	No	No
cg11631518	12	73889852	KCNC2	3747	6.461478745	0.22906874	No	No
cg22396353	22	45071351	GTSE1	51512	6.4288385	0.052204146	No	No
cg14223995	4	141709249	UCP1	7350	-6.409663736	0.171965801	No	No
cg22582569	11	111141635	PPP2R1B	5519	6.352315	-0.023622035	No	No
cg08169325	12	129890076	EPIM	2054	-6.322778588	0.114252652	No	No
cg22512531	11	122214761	CRTAM	56253	6.279600362	0.133945838	No	No
cg21207418	19	11549711	ACP5	54	6.268763011	0.049967278	No	No
cg02154074	2	74609742	HTRA2	27429	6.199036211	0.102340979	Yes	No
cg17940013	1	9111275	GPR157	80045	-6.195165774	0.061674573	No	No
cg16648841	1	57093273	C8A	731	6.097618377	-0.059209184	No	No
cg03724882	14	53933994	CDKN3	1033	6.080591714	0.030784331	No	No
cg16313343	14	104839154	BRF1	2972	6.023874287	0.245288739	No	No
cg21137706	12	62459571	TMEM5	10329	-5.983252062	-0.083001717	No	No
cg10523019	2	227408702	RHBDD1	84236	5.941622921	0.519850072	Yes	No
cg25459323	22	40702305	3-Sep	55964	-5.900533275	-0.291959894	No	No
cg20967028	12	14887539	ART4	420	5.85130181	0.019219519	No	No
cg23124451	22	37878077	CBX7	23492	-5.804862482	-0.45284138	Yes	No
cg07494518	21	43672036	SNF1LK	150094	-5.794138096	-0.057484849	No	No
cg26104204	19	45389265	MAP3K10	4294	-5.768101285	-0.055857947	No	No
cg12238343	5	33972159	RLN3R1	51289	5.749756441	0.458908694	No	No
cg06327515	5	140583445	PCDHB14	56122	5.716566436	0.080393493	No	No
cg22991148	21	44955527	C21orf29	54084	-5.681543236	-0.005278315	No	No
cg10052840	19	4509119	SEMA6B	10501	-5.67467637	-0.455351573	No	No
cg06134964	3	52787073	ITIH1	3697	5.64268843	-0.061251427	No	No
cg01626227	7	99355225	TRIM4	89122	-5.640661125	-0.126400463	No	No
cg02309431	20	31082592	BPIL3	128859	-5.609942057	-0.029590513	No	No
cg22511262	11	32411768	WT1	7490	5.567558371	0.191270122	No	No
cg11903057	4	39875171	RHOH	399	5.525340985	-0.0139343	No	No
cg04718414	13	114018313	CDC16	8881	-5.452605586	0.109544598	No	No
cg26201213	10	131155786	MGMT	4255	5.446299477	0.011123462	No	No
cg24674703	11	60626536	CD5	921	5.41797411	0.283295195	No	No
cg25229964	1	26376210	CNKSR1	10256	5.410729068	0.043865947	No	No
cg10878896	12	54980716	CS	1431	5.340752668	-0.078554316	No	No
cg04416752	9	129718848	ST6GALNAC4	27090	-5.338257391	-0.048133452	No	No
cg21120249	9	139041792	FLJ36268	401563	-5.286945909	-0.510192676	No	No
cg19586576	17	40262371	GJA7	10052	5.285877086	0.290053115	No	No
cg15551881	9	122728536	TRAF1	7185	5.216122264	0.105338419	No	No
cg11833861	17	28279748	TMEM98	26022	-5.210109944	0.08924972	No	No
cg13700897	8	109165240	RSPO2	340419	-5.203206279	-0.05345294	No	No
cg05473871	19	1464513	ADAMTSL5	339366	-5.15604937	-0.192186489	No	No
cg11487705	5	41906503	OXCT1	5019	-5.062657046	-0.051134653	No	No
cg16354207	2	238539647	UBE2F	140739	-4.990591369	-0.037804246	No	No
cg24921089	11	10429416	AMPD3	272	-4.986411499	0.027669027	No	No
cg04169469	2	10505885	ODC1	4953	4.926923884	-0.07605565	No	No
cg20090497	12	10853704	TAS2R9	50835	4.874022045	-0.151604997	No	No
cg20550118	15	76420717	CRABP1	1381	-4.852301857	0.163876131	No	No
cg04601137	19	1463314	ADAMTSL5	339366	-4.847499211	-0.265886996	No	No
cg17536848	7	156379316	LMBR1	64327	-4.833656874	-0.088853601	No	No
cg22282672	5	121493122	FLJ32921	133923	4.813692319	0.034811316	No	No
cg14423778	3	153468123	MBNL1	4154	-4.795612884	-0.244037465	Yes	No
cg07236943	7	94122422	PEG10	23089	4.684481441	0.144110219	No	No
cg03387497	20	17628945	C20orf179	140836	4.630001389	-0.092227203	No	No
cg05125838	3	48576589	UCN2	90226	-4.602562372	-0.366253833	No	No
cg02735486	4	114190384	ANK2	287	4.59476785	0.153554513	No	No
cg26824091	6	38778415	GLO1	2739	4.586931755	0.031308903	Yes	No
cg18691434	7	99613361	GPC2	221914	4.543967955	0.565821196	No	No
cg05228408	1	11787939	CLCN6	1185	-4.49429672	-0.458605583	No	No
cg19615059	12	108755302	TRPV4	59341	4.492646466	0.226567695	No	No
cg13296371	4	4301647	TMEM128	85013	4.457073326	-0.062968568	No	No
cg16718891	12	53099422	ITGA5	3678	-4.410288204	0.014241019	No	No
cg27514224	9	130748439	NUP188	23511	-4.390952425	0.031923492	No	No
cg00410898	8	23768300	STC1	6781	-4.303054603	0.069454767	No	No
cg16543027	15	38386972	PLCB2	5330	-4.284958486	-0.22449836	No	No
cg14350002	9	88752293	GAS1	2619	-4.233812041	-0.050459231	No	No
cg22407458	6	35217099	TCP11	6954	4.232471361	0.212107008	No	No
cg04480914	11	64448774	PPP2R5B	5526	-4.215631426	-0.081321728	No	No
cg11459714	19	56212470	KLK10	5655	-4.21297823	0.194727042	No	No
cg24493940	12	130879631	MMP17	4326	-4.202135081	-0.078983516	No	No
cg03819692	16	87753140	FLJ36701	283860	4.145197074	-0.13558094	No	No
cg08668790	19	62912474	ZNF154	7710	4.112113212	0.446475382	No	No
cg07180649	1	22342877	WNT4	54361	-4.105965549	0.049657485	No	No
cg00515905	1	110108030	EPS8L3	79574	-4.103268356	-0.08870949	No	No
cg22473095	20	18425967	RBBP9	10741	4.044042377	-0.004356223	No	No
cg17324128	10	44775506	RASSF4	83937	-4.043943288	-0.420045022	Yes	No
cg00113951	12	119562473	CABP1	9478	4.02670329	0.092666828	No	No
cg16408970	10	29005590	BAMBI	25805	4.024035102	0.313792482	No	No
cg00412805	3	42701974	KBTBD5	131377	4.016808807	0.10145508	No	No
cg01400401	19	4720531	C19orf30	284424	4.009589827	0.3782949	No	No
cg26581729	9	139059613	NPDC1	56654	-3.998837847	-0.473893065	No	No
cg12473775	11	66581226	RHOD	29984	-3.994735863	-0.300996084	No	No
cg26109803	10	102212788	WNT8B	7479	-3.984563973	-0.001078236	No	No
cg05442902	22	19699010	P2RXL1	9127	-3.966098185	-0.491250713	Yes	Yes
cg13351161	8	27546840	SCARA3	51435	-3.960753228	-0.294169042	No	No
cg21200703	4	25266726	SLC34A2	10568	3.959178135	0.262085021	No	No
cg23191950	15	99236597	ALDH1A3	220	3.958521328	0.194181133	No	No
cg05089968	6	166642763	MGC35308	285800	-3.91160807	-0.056944706	No	No
cg02071305	15	38973265	VPS18	57617	-3.886409522	-0.28990593	Yes	No
cg26746469	20	36096704	KIAA0406	9675	3.866139002	-0.080477575	No	No
cg17770886	10	134971321	ZNF511	118472	3.827665372	0.211494773	No	No
cg04755031	22	42619174	PNPLA5	150379	3.817194129	0.138870683	No	No
cg01623187	20	41789553	FAM112A	149699	-3.806275602	-0.04374421	No	No
cg09322949	6	41998021	TRFP	9477	3.784159584	0.068866042	No	No
cg19514469	16	65790933	ELMO3	79767	3.775144564	0.128266797	No	No
cg00687674	15	67160314	TMEM84	283673	3.757669266	0.241850857	No	No
cg08475827	2	151974476	RIF1	55183	3.702746231	-0.051366348	No	No
cg14918082	17	7773962	KCNAB3	9196	3.608249401	0.127029707	No	No
cg23818978	11	117588449	AMICA1	120425	3.603684682	0.043129727	No	No
cg13975369	7	129867789	TSGA14	95681	3.583069518	0.292021162	Yes	No
cg16295988	9	114520446	C9orf80	58493	3.558270741	0.052797151	No	No
cg13323474	10	74788529	TTC18	118491	3.552242836	0.038684128	No	No
cg09304040	12	54646874	CDK2	1017	3.548407354	0.000875052	No	No
cg22580353	19	49838740	PVR	5817	3.485338581	-0.076319407	No	No
cg15903282	3	135996380	EPHB1	2047	-3.473480174	-0.030948807	No	No
cg13718960	14	20341153	RNASE1	6035	3.468680041	0.075024044	No	No
cg00955230	7	73307141	RFC2	5982	3.41792265	-0.023054097	No	No
cg06144905	17	24393906	PIPOX	51268	3.413484589	0.140378315	Yes	No
cg09413557	1	151775337	S100A6	6277	-3.403045935	-0.018974658	No	No
cg15856055	10	134971285	ZNF511	118472	3.375380941	0.07295476	No	No
cg19685066	1	17954590	ACTL8	81569	3.331314764	-0.055052401	No	No
cg03258472	19	6414949	CRB3	92359	-3.301812331	0.096589494	No	No
cg16743289	1	173234767	CACYBP	27101	3.265740439	0.080874585	No	No
cg26932976	17	2561936	KIAA0664	23277	-3.259148427	-0.032472143	No	No
cg19883905	18	12244024	CIDEA	1149	-3.218932622	0.085999072	No	No
cg16713727	1	15935307	SLC25A34	284723	3.187970744	-0.041084389	No	No
cg21835643	20	43368775	RBPSUHL	11317	3.158955159	0.110361582	No	No
cg23668631	17	3743685	CAMKK1	84254	-3.15460847	-0.300496194	No	No
cg21006686	12	116284623	NOS1	4842	3.152813941	-0.001475692	No	No
cg05441133	10	48036897	GDF2	2658	3.103760739	0.031511508	No	No
cg08587542	5	141284084	KIAA0141	9812	-3.06398296	-0.522539937	No	No
cg20572838	17	45805744	EME1	146956	3.062671547	-0.052756553	No	No
cg21081971	13	37342765	TRPC4	7223	-2.970173829	0.223349613	No	No
cg20492933	5	154300809	MRPL22	29093	2.947623086	0.030789305	No	No
cg19731122	17	1343145	MYO1C	4641	2.914336066	0.082622677	No	No
cg09851465	1	60312259	C1orf87	127795	2.879940739	0.169490026	No	No
cg24505341	3	62836584	CADPS	8618	2.841188478	0.212540078	No	No
cg25536676	1	55125915	DHCR24	1718	-2.837642113	-0.416563663	No	No
cg19663795	16	30301355	1-Sep	1731	-2.827607692	-0.008239499	No	No
cg10917602	16	30904131	HSD3B7	80270	-2.815298757	-0.51419001	No	No
cg23234999	15	21362298	MKRN3	7681	2.789697779	0.144499648	No	No
cg06958034	1	23218790	AOF2	23028	2.788051118	-0.098904212	No	No
cg19439331	10	69990476	CXXC6	80312	2.757897465	0.132765084	No	No
cg14550518	3	21767942	ZNF659	79750	-2.732393181	-0.018904964	No	No
cg13854874	21	36679395	CHAF1B	8208	2.705537905	0.158626257	Yes	No
cg08586737	7	127013185	GCC1	79571	2.696221083	0.235218334	No	No
cg13307384	12	48304054	PRPF40B	25766	2.583560626	0.037525519	No	No
cg23152772	9	132803453	FIBCD1	84929	2.580749951	0.058616748	No	No
cg19560210	1	228579960	PGBD5	79605	2.560159507	-0.112268224	No	No
cg26711820	12	79625820	MYF6	4618	2.558421247	0.14580488	No	No
cg08900043	12	52665163	HOXC10	3226	2.536833226	0.294917432	No	No
cg15013019	19	13074451	LYL1	4066	-2.533299173	-0.112343631	No	No
cg21907579	12	113330251	TBX5	6910	2.497611714	0.390945005	No	No
cg13656062	19	15869723	CYP4F2	8529	2.484283954	-0.12127144	No	No
cg08694544	19	12807228	RTBDN	83546	2.481527201	0.424518386	No	No
cg06638451	3	58538309	FAM107A	11170	2.479689072	0.040840922	No	No
cg07211259	9	5500497	PDCD1LG2	80380	-2.423609122	-0.66583344	No	No
cg19297232	16	67040522	SMPD3	55512	-2.403650899	0.05340576	No	No
cg04087608	1	119759492	HSD3B2	3284	2.383062953	-0.006006334	No	No
cg20652640	16	87047557	ZFPM1	161882	-2.37602848	-0.1047532	No	No
cg19378133	16	6008836	A2BP1	54715	2.374343432	0.065592019	No	No
cg10570177	9	135314407	C9orf7	11094	2.358758156	0.359812084	No	No
cg01252496	19	17187655	MDS032	55850	2.348957061	0.009096432	No	No
cg12177001	14	93645901	IFI27	3429	2.336851094	-0.0910812	No	No
cg20891917	7	111851267	IFRD1	3475	2.296781942	0.072911929	No	No
cg26022315	17	44376803	SNF8	11267	-2.270877875	0.111587354	No	No
cg06994793	5	139999095	PRO1580	55374	2.264576345	-0.072310525	No	No
cg15427448	11	116692106	BACE1	23621	2.261768982	0.095152263	No	No
cg25713185	2	228290730	SLC19A3	80704	2.25600198	0.309201094	No	No
cg25251635	7	100141106	POP7	10248	2.248622897	-0.02185796	No	No
cg26898166	2	72997307	EMX1	2016	-2.24450608	-0.024435623	No	No
cg19028160	2	239986947	HDAC4	9759	-2.242872325	-0.040218274	No	No
cg12145907	5	140845018	PCDHGC4	56098	2.227238015	0.354074846	No	No
cg07073964	19	649371	PRSSL1	400668	-2.216579511	-0.138815736	No	No
cg03007010	19	40958680	SNX26	115703	-2.202237705	-0.059165829	No	No
cg20828084	15	78857906	KIAA1199	57214	2.193830696	0.09326033	Yes	No
cg21926612	6	163069159	PARK2	5071	-2.151586582	-0.021146456	No	No
cg13571802	3	44891477	TGM4	7047	-2.123161461	-0.071932656	No	No
cg21762589	10	133646466	BNIP3	664	2.116884479	0.1887945	No	No
cg16612562	22	28042045	RRP22	10633	2.080897193	0.297450673	No	No
cg00350702	20	33593341	ERGIC3	51614	2.072016695	0.007235544	No	No
cg19686152	15	49908834	TMOD3	29766	-2.066714676	-0.294116195	No	No
cg03703325	3	50581868	HEMK1	51409	2.057604969	-0.02769744	No	No
cg26614073	3	47492823	SCAP	22937	-2.026512819	-0.57355402	Yes	No
cg18881501	17	21127969	MAP2K3	5606	-2.022128432	-0.101851462	No	No
cg15171237	4	185808952	CASP3	836	-1.981506525	0.004392184	No	No
cg08654655	1	157407687	IGSF4B	57863	1.973711223	0.220998322	No	No
cg11490446	14	72672676	PSEN1	5663	1.961425559	0.076001881	No	No
cg03623878	13	112703561	MCF2L	23263	1.943750756	0.310608975	No	No
cg13258700	7	156126758	C7orf13	129790	1.935417196	0.097065183	No	No
cg00297600	8	35521212	UNC5D	137970	1.908695219	-0.102157143	No	No
cg08074477	17	35911475	TNS4	84951	1.902730524	-0.196004478	No	No
cg06637774	11	72653350	P2RY6	5031	1.89342443	0.226181906	No	No
cg19632206	1	188713379	FAM5C	339479	1.89091587	0.0198233	No	No
cg16357381	3	48607896	COL7A1	1294	-1.880522626	-0.041571556	No	No
cg19149785	19	56198085	KLK8	11202	-1.875110597	0.016632923	No	No
cg00335286	18	13906355	MC2R	4158	1.855444605	-0.029787055	No	No
cg00412772	19	43486685	C19orf33	64073	1.844120976	0.214100711	No	No
cg20234170	11	34416683	CAT	847	1.829049562	-0.027479389	No	No
cg07038400	3	137166853	PPP2R3A	5523	1.7787351	-0.013732062	No	No
cg21712685	6	35852583	UNQ3045	389383	-1.765357537	0.052306324	No	No
cg15498283	11	737520	TALDO1	6888	1.743616315	-0.015372606	No	No
cg23127998	20	14266152	FLRT3	23767	1.686038152	-0.012231206	No	No
cg00582628	8	54927068	RGS20	8601	-1.678163605	-0.433036931	No	No
cg18001427	21	29313655	C21orf6	10069	-1.649720496	-0.013352207	No	No
cg10669058	19	19509555	CILP2	148113	-1.649159645	0.133914743	No	No
cg19573166	14	22892248	SLC22A17	51310	-1.645326874	-0.267767868	No	No
cg01946401	6	45404079	RUNX2	860	-1.552392375	-0.353846707	No	No
cg08872493	1	23394004	HTR1D	3352	1.548231761	-0.058284681	No	No
cg22484793	3	52236365	TLR9	54106	1.547278123	0.143434779	No	No
cg05440289	1	151147743	IVL	3713	1.547194374	0.03794318	No	No
cg12188560	9	34581192	CNTFR	1271	-1.546553159	-0.032582362	No	No
cg02480835	7	23187879	NUPL2	11097	1.531112896	-0.012750639	No	No
cg19356189	19	56216502	KLK10	5655	-1.528350646	-0.354948869	No	No
cg12402251	8	91163987	CALB1	793	1.509543012	0.347121803	No	No
cg22179082	13	26232259	GPR12	2835	-1.509071514	0.197749027	No	No
cg15201877	1	71285561	PTGER3	5733	1.467052004	0.4883572	No	No
cg27626102	7	89678667	STEAP2	261729	-1.465742937	0.070542795	No	No
cg21649520	8	82522354	PMP2	5375	-1.462031413	-0.00871546	No	No
cg23213217	1	222436778	DEGS1	8560	1.448091683	0.09423524	No	No
cg00744433	21	17805938	CXADR	1525	-1.411402743	-0.009871697	No	No
cg24556026	9	36248971	GNE	10020	1.410756917	-0.036178583	No	No
cg19724470	9	5440936	CD274	29126	-1.399107852	-0.521946698	Yes	No
cg22809047	2	100984693	RPL31	6160	1.377506045	0.468968988	Yes	No
cg11896923	17	35078553	PNMT	5409	-1.375881082	-0.456850618	No	No
cg00168942	10	35934436	CX40.1	219770	-1.375221101	-0.465777349	Yes	No
cg16984944	3	101462115	TBC1D23	55773	-1.359979716	-0.248453755	Yes	No
cg02197293	19	44214998	FBXO27	126433	1.326475211	0.23412057	No	No
cg19566405	17	30784078	FLJ10260	55106	1.286269453	0.00584506	No	No
cg10591174	12	109842829	MYL2	4633	-1.280172495	-0.140595102	No	No
cg23338195	8	118215599	SLC30A8	169026	1.264378979	-0.118994713	No	No
cg26350286	8	95721867	RBM35A	54845	-1.261236982	0.028731578	No	No
cg06295856	11	14950218	CALCA	796	1.251326977	0.288064211	No	No
cg01335367	12	108656591	C12orf34	84915	1.211111994	0.317607173	No	No
cg05898102	5	140552143	PCDHB10	56126	1.202033611	0.050199843	No	No
cg18392482	12	94862142	AMDHD1	144193	-1.196389134	-0.11738965	No	No
cg26312920	7	31346915	NEUROD6	63974	-1.182810193	-0.230809886	No	No
cg12813792	20	56159101	C20orf85	128602	1.182049823	0.097246438	No	No
cg08424423	6	31196167	CDSN	1041	-1.156840533	-0.125404888	No	No
cg13510262	12	52060304	SP1	6667	1.146725133	-0.007150412	No	No
cg21363706	8	18110765	NAT1	9	1.140495095	0.198965867	No	No
cg09254939	19	56212071	KLK10	5655	-1.115123986	0.188668759	No	No
cg13899108	19	18205322	PDE4C	5143	1.112549015	0.396869585	Yes	No
cg21184495	17	27701203	ZNF207	7756	-1.102666731	-0.05789654	No	No
cg17627559	11	2280472	TSPAN32	10077	1.069116234	-0.015891044	No	No
cg01261503	17	59924061	POLG2	11232	1.047474154	0.003497393	No	No
cg26219051	22	42069573	SCUBE1	80274	1.046570867	0.371515438	No	No
cg14009688	7	134114782	CALD1	800	1.041709284	-0.062753149	No	No
cg21993406	5	68520539	CENPH	64946	1.01756345	0.12782741	No	No
cg24110063	16	31347253	COX6A2	1339	-1.01239731	-0.073819404	No	No
cg10900550	9	99213805	TDRD7	23424	-0.993401947	-0.177992152	No	No
cg05422352	2	232358991	COPS7B	64708	0.965636264	-0.004156041	No	No
cg18384097	1	200396189	PTPN7	5778	-0.960409715	-0.022626204	No	No
cg01511567	11	56860207	SSRP1	6749	-0.955659544	-0.506563625	Yes	No
cg15489301	7	133863578	AKR1B10	57016	-0.925473409	-0.144147655	No	No
cg26394940	22	44828125	FLJ10945	55267	-0.852196304	-0.235292907	Yes	No
cg18241647	20	43186761	WFDC12	128488	0.833493573	-0.121047468	No	No
cg17966192	2	108360548	SULT1C2	27233	-0.814304713	-0.106441905	No	No
cg18732541	19	7647602	MCEMP1	199675	0.797614179	0.165292233	No	No
cg20570279	11	116164339	ZNF259	8882	-0.790590456	-0.198254058	No	No
cg23239039	4	4440016	D4S234E	27065	0.774552515	0.196108354	No	No
cg13654195	6	7335090	RIOK1	83732	-0.764669972	0.002550524	No	No
cg17431739	10	23424053	MSRB2	22921	-0.762536285	-0.297320094	No	No
cg16816226	3	5203848	EDEM1	9695	-0.761063169	-0.008226467	No	No
cg08251399	2	31311112	EHD3	30845	0.755043977	0.055411828	No	No
cg09799873	19	8291500	NDUFA7	4701	-0.750651448	-0.337875855	No	No
cg15887846	11	65535768	CST6	1474	-0.742899932	0.093882058	No	No
cg22194129	12	7792928	CLEC4C	170482	0.727265735	0.100761829	No	No
cg25898500	16	1817265	HAGH	3029	-0.725019577	-0.072688466	No	No
cg16372520	14	77939504	NRXN3	9369	0.71058822	-0.021777818	No	No
cg09096950	11	117735305	UBE4A	9354	0.684630536	0.091818492	No	No
cg12864235	5	27074539	CDH9	1007	0.655304718	0.05377698	No	No
cg18809289	10	45189822	ALOX5	240	0.653578992	0.381666867	No	No
cg24651706	2	113058343	CHCHD5	84269	0.653433186	-0.053025651	No	No
cg21201109	19	11168090	ANKRD25	25959	0.648066076	-0.092258069	No	No
cg23568913	22	29317549	PES1	23481	-0.644984918	0.032693161	No	No
cg23159337	3	194755472	ATP13A4	84239	-0.632208093	0.006263315	No	No
cg10795646	1	150242190	S100A10	6281	-0.630165	-0.374228498	No	No
cg24332433	17	68600498	SLC39A11	201266	0.617734017	0.024558576	No	No
cg13861644	12	129388239	PIWIL1	9271	0.588384291	0.085357831	No	No
cg06171242	6	24775469	TTRAP	51567	0.573872643	-0.031438638	No	No
cg00338702	12	131973767	CHFR	55743	0.534125992	0.150788619	No	No
cg04818845	1	6502754	PLEKHG5	57449	0.530063706	0.170097726	No	No
cg18468844	1	28376307	PTAFR	5724	-0.514411149	-0.263008473	No	No
cg06975499	17	38150407	EZH1	2145	-0.508782249	-0.013805931	No	No
cg01128603	11	65576967	SF3B2	10992	-0.499180939	-0.09460743	No	No
cg13119609	19	50141137	APOC2	344	-0.497800027	-0.169000525	No	No
cg10667970	1	11646644	FBXO6	26270	-0.494137066	-0.3155786	No	No
cg09404633	1	200182069	LMOD1	25802	-0.481760063	-0.031890989	No	No
cg01918706	1	200577464	UBE2T	29089	0.481129756	0.046920206	No	No
cg11618577	2	27519047	KRTCAP3	200634	0.45590634	0.236644286	No	No
cg22983092	17	36165064	KRT25A	147183	0.434401518	0.080710707	No	No
cg18771300	14	62741490	RHOJ	57381	-0.430534396	0.095964677	No	No
cg10202457	1	181654374	NMNAT2	23057	-0.41970649	0.114314434	No	No
cg19371795	19	7246107	INSR	3643	0.402226134	0.060641514	No	No
cg12991365	3	53855893	CHDH	55349	-0.399519083	0.092019302	No	No
cg22090592	14	104245687	C14orf173	64423	-0.38718029	-0.186126866	No	No
cg14972143	4	100070026	EIF4E	1977	0.385312405	0.015252392	No	No
cg01056568	17	9669983	GLP2R	9340	-0.326099256	0.014353917	No	No
cg24505122	12	1596553	WNT5B	81029	0.307545432	-0.11785877	No	No
cg12324144	3	171014357	LRRC34	151827	0.299599643	0.073590455	No	No
cg05697249	11	111294903	C11orf52	91894	-0.297182577	0.008703087	No	No
cg01459453	1	167865836	SELP	6403	-0.294798529	-0.46227509	Yes	No
cg16728114	1	154964417	C1orf66	51093	0.275798966	-0.051455863	No	No
cg09196959	6	30212419	TRIM40	135644	0.260322504	-0.037382119	No	No
cg04359302	3	180806553	MRPL47	57129	0.255790471	0.064442739	No	No
cg00862290	3	180467667	KCNMB3	27094	-0.233766711	-0.06720969	No	No
cg01114088	4	5072012	CYTL1	54360	-0.226611181	-0.099477547	No	No
cg13613532	11	107843607	MGC33948	160140	0.21020524	-0.014151437	No	No
cg12289045	19	55833173	SYT3	84258	0.205379773	0.173007942	No	No
cg16466334	11	102219568	MMP3	4314	0.166685207	-0.078657953	No	No
cg09630437	19	2691301	SLC39A3	29985	0.165360604	-0.006958893	No	No
cg04333463	8	62789241	ASPH	444	0.164994457	0.08256681	No	No
cg05501584	15	90737310	ST8SIA2	8128	-0.164581823	0.019411021	No	No
cg09294589	3	33130137	CRTAP	10491	-0.157799598	-0.012570957	No	No
cg16319578	14	64077265	HSPA2	3306	0.155277938	0.384834	No	No
cg13460409	21	37301440	DSCR6	53820	0.148824189	0.315590216	Yes	No
cg18587364	19	9646779	ZNF562	54811	-0.137734976	-0.059298992	No	No
cg14105047	4	95591833	PDLIM5	10611	0.137366272	-0.068136625	No	No
cg00079056	9	33229641	SPINK4	27290	0.122818203	-0.169515807	No	No
cg20674577	20	57612935	PHACTR3	116154	-0.120528788	0.053868953	No	No
cg22197830	5	134237683	C5orf14	79770	-0.117965431	-0.364531369	Yes	No
cg09045681	6	31235157	TCF19	6941	0.11706097	-0.163438761	No	No
cg14467840	1	151867596	S100A1	6271	0.11617835	0.00205197	No	No
cg13587552	1	1206304	SCNN1D	6339	-0.096960459	-0.139093873	No	No
cg25022327	11	128317672	P53AIP1	63970	-0.085880587	-0.050519402	No	No
cg04616566	15	69807614	THSD4	79875	0.068531735	-0.031073956	No	No
cg26842024	19	16297122	KLF2	10365	0.063834719	0.360021481	Yes	No
cg17903544	12	131796847	PGAM5	192111	0.058590013	0.236753545	No	No
cg21053529	15	32834052	CX36	57369	-0.052460218	0.223772354	No	No
cg06363129	7	16472127	SOSTDC1	25928	-0.047794699	0.060576033	No	No
cg23173910	2	73973782	ACTG2	72	-0.047747114	-0.029781544	No	No
cg09434995	7	75878323	SRCRB4D	136853	0.04407787	-0.129410218	No	No
cg13843773	4	81475835	MGC35043	255119	0.043585555	0.065113852	No	No
cg27440834	3	126722531	SNX4	8723	0.033980159	-0.280693366	No	No
cg15642326	19	50445986	MARK4	57787	0.032502686	-0.042281841	No	No
cg27244482	5	149649681	CAMK2A	815	-0.031981428	0.048362042	No	No
cg00083937	22	49386671	MAPK8IP2	23542	0.030577331	0.176660699	No	No
cg22395019	2	31215196	GALNT14	79623	0.027494572	0.334006008	No	No
cg17923358	7	103416854	RELN	5649	0.024808297	0.258794314	No	No
cg17861230	19	18204901	PDE4C	5143	0.023738294	0.545223732	No	No
cg08212685	5	81303827	ATG10	83734	0.012944061	0.074078962	No	No
cg12373771	22	15981381	CECR6	27439	0.01052681	0.521436726	Yes	No
cg00503840	7	96488445	DLX5	1749	0.002679625	0.549714349	No	No
cg15381313	12	99391640	NR1H4	9971	0.002078841	0.033689669	No	No
