# Supplementary material for: An epigenetic biomarker of aging for lifespan and healthspan
Source: Aging (Albany NY). 2018 Apr 17;10(4):573–91. doi: 10.18632/aging.101414 (PMC5940111; doi:10.18632/aging.101414)
Supplement: Supplement 3 [file aging-10-101414-s003.xlsx]

## Sheet: Monocytes_cpgNeigborCors
SEQIDNO	Probe	SequenceWithCpGMarked	ChromosomeBuilt36	PositionBuilt36	Strand	Gene	Coefficient	bicor	p	Z	t	nObs	symbol	name	entrez	location
1	cg00079056	TAAAAATGATCATTTCTGCTTACGTTTACAGCTCATTTCATATTCTGCAAAATGTTTTCC[CG]TCTGCTATCACCGCCGCCATCCTCACAGCAGCCTGGGAGAAAGGCAGAGCCAAAAGTCTC	9	33229641	R	SUGT1P1;SPINK4	0.122818	0.0130165	0.652113	0.450929	0.450942	1202	SPINK4	serine peptidase inhibitor, Kazal type 4	27290	chr9:33246672:33246721:+
2	cg00083937	GCCCTGCGGGAAGGGACTGGGGTTGGGAGGACGCTGGGCCTCTGGGTTTAGGCCTCACTC[CG]CCGGAGAGGGGGAGACAAACAGGCCAGACTCTCTTCCCAGAGCAGGAGCGACCCCTCCCC	22	49386671	R	MAPK8IP2	0.0305773	-0.000239678	0.993377	-0.0083027	0.0083027	1202	MAPK8IP2	mitogen-activated protein kinase 8 interacting protein 2	23542	chr22:51049286:51049335:+
2	cg00083937	GCCCTGCGGGAAGGGACTGGGGTTGGGAGGACGCTGGGCCTCTGGGTTTAGGCCTCACTC[CG]CCGGAGAGGGGGAGACAAACAGGCCAGACTCTCTTCCCAGAGCAGGAGCGACCCCTCCCC	22	49386671	R	MAPK8IP2	0.0305773	-0.0124732	0.665734	-0.432106	0.432118	1202	MAPK8IP2	mitogen-activated protein kinase 8 interacting protein 2	23542	chr22:51039237:51039286:+
2	cg00083937	GCCCTGCGGGAAGGGACTGGGGTTGGGAGGACGCTGGGCCTCTGGGTTTAGGCCTCACTC[CG]CCGGAGAGGGGGAGACAAACAGGCCAGACTCTCTTCCCAGAGCAGGAGCGACCCCTCCCC	22	49386671	R	MAPK8IP2	0.0305773	0.00959154	0.739739	0.332271	0.332276	1202	MAPK8IP2	mitogen-activated protein kinase 8 interacting protein 2	23542	chr22:51041598:51041647:+
2	cg00083937	GCCCTGCGGGAAGGGACTGGGGTTGGGAGGACGCTGGGCCTCTGGGTTTAGGCCTCACTC[CG]CCGGAGAGGGGGAGACAAACAGGCCAGACTCTCTTCCCAGAGCAGGAGCGACCCCTCCCC	22	49386671	R	MAPK8IP2	0.0305773	0.000114444	0.996837	0.00396445	0.00396445	1202	MAPK8IP2	mitogen-activated protein kinase 8 interacting protein 2	23542	chr22:51049587:51049636:+
3	cg00113951	GCGTTTGTAGGCAGTGATGTCACAGAGTGCCTTCATGCTCCTCGGGTCTCCGGTTCTCCC[CG]GACCTCTGTAGTCCTCATTGCCAAAGTTGTACCCCCTGGGGAGTGCACCCTGCCTGCATT	12	119562473	F	CABP1	4.0267	0.0261186	0.365604	0.904979	0.905082	1202	CABP1	calcium binding protein 1	9478	chr12:121094016:121094065:+
3	cg00113951	GCGTTTGTAGGCAGTGATGTCACAGAGTGCCTTCATGCTCCTCGGGTCTCCGGTTCTCCC[CG]GACCTCTGTAGTCCTCATTGCCAAAGTTGTACCCCCTGGGGAGTGCACCCTGCCTGCATT	12	119562473	F	CABP1	4.0267	0.0587996	0.0415281	2.03923	2.04041	1202	CABP1	calcium binding protein 1	9478	chr12:121078659:121078708:+
3	cg00113951	GCGTTTGTAGGCAGTGATGTCACAGAGTGCCTTCATGCTCCTCGGGTCTCCGGTTCTCCC[CG]GACCTCTGTAGTCCTCATTGCCAAAGTTGTACCCCCTGGGGAGTGCACCCTGCCTGCATT	12	119562473	F	CABP1	4.0267	-0.0102815	0.721767	-0.356176	0.356182	1202	CABP1	calcium binding protein 1	9478	chr12:121104848:121104897:+
4	cg00168942	CTTTGCTTTCTTATCTCCAGCTCACACCTTTAAGTCTTATGTAGTTAAAGGACATTTATC[CG]CCTCCTTGGAGAACACAGCCCTCCAGTGTCTCCTGCAGCCTGGAGCCTGGGACATTCTGG	10	35934436	R	GJD4;GJD4	-1.37522	0.0730725	0.0112715	2.53583	2.53809	1202	GJD4	gap junction protein delta 4	219770	chr10:35897616:35897665:+
5	cg00194146	TTATTGTAAACCCATTTTACCAGTGATGTGAATGAGCCGCAATGAAGGCTAAGGGACTTG[CG]CAAGGTGACATATATAAGCAACAGGCCTGCGATTGGAATCCAGGCCCCAGAGTCTGGGCA	6	13596383	F	GFOD1	-11.8863	-0.0103134	0.720942	-0.357278	0.357284	1202	GFOD1	glucose-fructose oxidoreductase domain containing 1	85411	chr6:13469611:13469660:-
5	cg00194146	TTATTGTAAACCCATTTTACCAGTGATGTGAATGAGCCGCAATGAAGGCTAAGGGACTTG[CG]CAAGGTGACATATATAAGCAACAGGCCTGCGATTGGAATCCAGGCCCCAGAGTCTGGGCA	6	13596383	F	GFOD1	-11.8863	-0.0718923	0.0126623	-2.49473	2.49688	1202	GFOD1	glucose-fructose oxidoreductase domain containing 1	54438	chr6:13363915:13363964:-
6	cg00230271	AGGGGGATGGAGCTTCTACACAGGGCCCCAGCGCTGTCGCTGTGGCTGCTGCTGCCGCTA[CG]GCTTAGTGCACCAGACGCTGCATTTCAGGTGCTCCTACAAAAGAGGCCACTCCTGGAACG	4	107456632	F	TBCK;TBCK;AIMP1;AIMP1;TBCK;TBCK;TBCK;AIMP1;TBCK;AIMP1;TBCK	-12.1547	0.00323224	0.910867	0.111969	0.111969	1202	TBCK	TBC1 domain containing kinase	93627	chr4:106967644:106967693:-
6	cg00230271	AGGGGGATGGAGCTTCTACACAGGGCCCCAGCGCTGTCGCTGTGGCTGCTGCTGCCGCTA[CG]GCTTAGTGCACCAGACGCTGCATTTCAGGTGCTCCTACAAAAGAGGCCACTCCTGGAACG	4	107456632	F	TBCK;TBCK;AIMP1;AIMP1;TBCK;TBCK;TBCK;AIMP1;TBCK;AIMP1;TBCK	-12.1547	0.0199869	0.488755	0.692457	0.692504	1202	AIMP1	aminoacyl tRNA synthetase complex interacting multifunctional protein 1	9255	chr4:107269320:107269369:+
7	cg00261781	AAGGTCCCGCGGCCTCGGGCCCCGCCCCGCCCCGGGGCCTCGAGCGCCAGGCCGGCCCGG[CG]AACCCCGCCCAAGGCCAACAAGGAGCCTTGTCCGCGCATTCCAGCGGCAGAAACGGAATG	2	20075998	F	MATN3	13.3994	0.0463291	0.108403	1.60604	1.60661	1202	MATN3	matrilin 3	4148	chr2:20196916:20196965:-
8	cg00297600	CCTCAGATGCACAGTGACACCCACCTTGGAGAGTTTCTGTGTCTCTTAAATGACCGAATC[CG]TGTAGAAGGCTTATTACCACAATCTGTAGCTACTTGGTAAACGGCAGCTCTTATTTTGAC	8	35521212	R	UNC5D	1.9087	0.00304561	0.915994	0.105503	0.105503	1202	UNC5D	unc-5 netrin receptor D	137970	chr8:35651816:35651865:+
9	cg00335286	GCCAAACCAGTGGCTGTTTCTGAAATGTGAGCTTCCGCCCCAAGCTAAAAAGTGTTCACA[CG]TGGGTGGTCTGGAAAAGACCAAAGAGAGAGACCTGAGTTGAATTTGCCAGGCGGGTAAAC	18	13906355	R	MC2R	1.85544	0.00629908	0.827302	0.21821	0.218211	1202	MC2R	melanocortin 2 receptor	4158	chr18:13882125:13882174:-
381	cg20066677	AAGAAGCCCTCACCGAGAGCTGTGGGAACAAGAGCTGCCGGGAACAAGAGCTGCGGGAAG[CG]GCTCCTACGAATTGGTGGCAGGAGGCACAAAAACGAAATACCTATTTTTGGAATACGGAA	12	131934493	F	CHFR;CHFR;CHFR;CHFR;CHFR	13.327	-0.0247927	0.390453	-0.859019	0.859107	1202	CHFR	checkpoint with forkhead and ring finger domains	55743	chr12:133417161:133417210:-
11	cg00350702	GAAGCAGTTCGATGCCTACCCCAAGACTTTGGAGGACTTCCGGGTCAAGACCTGCGGGGG[CG]CCACCGGTAGGCCGCAGCGGGGCCGGGGTCGCGTGGAGGGGGGCGTCCTAGAGCTTAGCC	20	33593341	R	ERGIC3;ERGIC3	2.07202	-0.00880107	0.760503	-0.304886	0.30489	1202	ERGIC3	ERGIC and golgi 3	51614	chr20:34143809:34143858:+
11	cg00350702	GAAGCAGTTCGATGCCTACCCCAAGACTTTGGAGGACTTCCGGGTCAAGACCTGCGGGGG[CG]CCACCGGTAGGCCGCAGCGGGGCCGGGGTCGCGTGGAGGGGGGCGTCCTAGAGCTTAGCC	20	33593341	R	ERGIC3;ERGIC3	2.07202	-0.00153597	0.957575	-0.0532077	0.0532077	1202	ERGIC3	ERGIC and golgi 3	51614	chr20:34144981:34145020:+,chr20:34145196:34145205:+
12	cg00410898	CTTGCACCTCTGGCTTTTGCAAACTGGGGGCCCAAGAGCTGCACCCAGGGATTTTATAGC[CG]TTCTTATCGGTCCTCAGGATCAAGGACCAATCAGGTCCCTCAACTGGTCTGGTGAGCCAA	8	23768300	R	STC1	-4.30305	-0.0166947	0.563101	-0.578375	0.578402	1202	STC1	stanniocalcin 1	6781	chr8:23699776:23699825:-
13	cg00412772	TTGGGTGGGGCGTCTCAGCATTCCTCCAACGGGCAGGTCTCAGCGCTCCTCCCCCTGCTC[CG]CTCCTCTGCAGGGCCCAGGCGCCCTTGGCCTTAGGACCCAACTTCTCTTACCGCCATGGA	19	43486685	F	YIF1B;YIF1B;C19orf33;YIF1B;YIF1B;YIF1B;YIF1B;YIF1B;C19orf33	1.84412	-0.0839585	0.00358037	-2.91527	2.91871	1202	C19orf33	chromosome 19 open reading frame 33	64073	chr19:38795300:38795326:+,chr19:38795485:38795507:+
13	cg00412772	TTGGGTGGGGCGTCTCAGCATTCCTCCAACGGGCAGGTCTCAGCGCTCCTCCCCCTGCTC[CG]CTCCTCTGCAGGGCCCAGGCGCCCTTGGCCTTAGGACCCAACTTCTCTTACCGCCATGGA	19	43486685	F	YIF1B;YIF1B;C19orf33;YIF1B;YIF1B;YIF1B;YIF1B;YIF1B;C19orf33	1.84412	0.0462503	0.109005	1.6033	1.60388	1202	YIF1B	Yip1 interacting factor homolog B, membrane trafficking protein	90522	chr19:38794414:38794463:-
13	cg00412772	TTGGGTGGGGCGTCTCAGCATTCCTCCAACGGGCAGGTCTCAGCGCTCCTCCCCCTGCTC[CG]CTCCTCTGCAGGGCCCAGGCGCCCTTGGCCTTAGGACCCAACTTCTCTTACCGCCATGGA	19	43486685	F	YIF1B;YIF1B;C19orf33;YIF1B;YIF1B;YIF1B;YIF1B;YIF1B;C19orf33	1.84412	0.00740985	0.797461	0.256689	0.256692	1202	YIF1B	Yip1 interacting factor homolog B, membrane trafficking protein	90522	chr19:38799864:38799881:-,chr19:38799666:38799697:-
13	cg00412772	TTGGGTGGGGCGTCTCAGCATTCCTCCAACGGGCAGGTCTCAGCGCTCCTCCCCCTGCTC[CG]CTCCTCTGCAGGGCCCAGGCGCCCTTGGCCTTAGGACCCAACTTCTCTTACCGCCATGGA	19	43486685	F	YIF1B;YIF1B;C19orf33;YIF1B;YIF1B;YIF1B;YIF1B;YIF1B;C19orf33	1.84412	-0.00870509	0.763036	-0.301561	0.301565	1202	YIF1B	Yip1 interacting factor homolog B, membrane trafficking protein	90522	chr19:38795886:38795935:-
13	cg00412772	TTGGGTGGGGCGTCTCAGCATTCCTCCAACGGGCAGGTCTCAGCGCTCCTCCCCCTGCTC[CG]CTCCTCTGCAGGGCCCAGGCGCCCTTGGCCTTAGGACCCAACTTCTCTTACCGCCATGGA	19	43486685	F	YIF1B;YIF1B;C19orf33;YIF1B;YIF1B;YIF1B;YIF1B;YIF1B;C19orf33	1.84412	-0.00828033	0.774277	-0.286846	0.286849	1202	YIF1B	Yip1 interacting factor homolog B, membrane trafficking protein	90522	chr19:38795756:38795805:-
14	cg00412805	TTTCTCTGGGAGGGGGCCTCTGCCCAGCTGTCCCCTGTGCGTCATGTGCAGGAGGCCAGG[CG]GCTCGCCTTACAGGGACCCGGCCACCTCTATATATAGCCCCTCGAAGACAGCTGCTCAGT	3	42701974	F	KBTBD5	4.01681	0.0124624	0.666006	0.431732	0.431743	1202	KBTBD5	kelch like family member 40	131377	chr3:42733668:42733717:+
15	cg00462994	CAGAGGAGACTCCTGGTCCCCTGTCCGGACCCCGCCCCGACCAGGTCCAGCCCCGCCCAA[CG]GCAAGTTAAGAGCCCCCCAGTGCCAGACGCTCCAGACAGACTGCCACTCTTGGGGGGCAA	17	39437481	F	NAGS;PYY	13.5874	-0.00933434	0.746475	-0.32336	0.323365	1202	NAGS	N-acetylglutamate synthase	162417	chr17:42086118:42086167:+
15	cg00462994	CAGAGGAGACTCCTGGTCCCCTGTCCGGACCCCGCCCCGACCAGGTCCAGCCCCGCCCAA[CG]GCAAGTTAAGAGCCCCCCAGTGCCAGACGCTCCAGACAGACTGCCACTCTTGGGGGGCAA	17	39437481	F	NAGS;PYY	13.5874	0.0166343	0.564514	0.576283	0.576309	1202	PYY	peptide YY	5697	chr17:42030251:42030300:-
16	cg00503840	CTGGAGGCATCTTCGGACCTCTGGGCGGCCCAGCCCTGCCTGGCGTCTCCCCGCCGCTTG[CG]GCCTACCGCCAAGAAGCTATGCCTTAGGCAAACCATGGAGCTCTGGCCCCAGAGGGCGCC	7	96488445	F	DLX5	0.00267963	0.025957	0.368577	0.89938	0.899481	1202	DLX5	distal-less homeobox 5	1749	chr7:96650025:96650074:-
17	cg00515905	GGTGCCAGTGAAGGCCGGGTGCCTGGTCCCCCCAGGAGGCTGGTCTTGGAGCAGGTGGTC[CG]GTGCTGGTGGTGGAAGGACAGCAGCTTCTCTGCTAGTGGCCACAGGCAGAGCCTGCCTTT	1	110108030	R	EPS8L3;EPS8L3;EPS8L3;EPS8L3;EPS8L3;EPS8L3	-4.10327	0.0772879	0.00734497	2.68268	2.68536	1202	EPS8L3	EPS8 like 3	79574	chr1:110292862:110292911:-
17	cg00515905	GGTGCCAGTGAAGGCCGGGTGCCTGGTCCCCCCAGGAGGCTGGTCTTGGAGCAGGTGGTC[CG]GTGCTGGTGGTGGAAGGACAGCAGCTTCTCTGCTAGTGGCCACAGGCAGAGCCTGCCTTT	1	110108030	R	EPS8L3;EPS8L3;EPS8L3;EPS8L3;EPS8L3;EPS8L3	-4.10327	-0.0178203	0.53708	-0.61738	0.617412	1202	EPS8L3	EPS8 like 3	79574	chr1:110293900:110293915:-,chr1:110293381:110293414:-
18	cg00582628	AAAACATGCCCCAGCTTTCCCAAGATAACCAAGAGTGCCTCCAGAAACATTTCTCCAGGC[CG]TCTATATGGACACAGTTTCTGCCCCTGTTCAGGGCTCAGAGATATAATACAGACATTCAC	8	54927068	R	RGS20	-1.67816	0.0117122	0.685	0.405739	0.405749	1202	RGS20	regulator of G-protein signaling 20	8601	chr8:54792110:54792159:+
18	cg00582628	AAAACATGCCCCAGCTTTCCCAAGATAACCAAGAGTGCCTCCAGAAACATTTCTCCAGGC[CG]TCTATATGGACACAGTTTCTGCCCCTGTTCAGGGCTCAGAGATATAATACAGACATTCAC	8	54927068	R	RGS20	-1.67816	-0.0062052	0.829836	-0.214957	0.214959	1202	RGS20	regulator of G-protein signaling 20	8601	chr8:54871439:54871488:+
19	cg00687674	CTACAACTATGGCTTGTCTGAGTCCTGAGCCAGCAGAGCTCAGGCCACAGCACCTGCACC[CG]TTTTCTGCTGCTGCACACAAGGGCTCTGTGCATTCCGCATCCAGGTGTGCCCCTCCTCTT	15	67160314	F	MIR548H4;TMEM84	3.75767	0.0166611	0.563887	0.577211	0.577238	1202	MIR548H4	microRNA 548h-4	NA	chr8:26906407:26906456:-
19	cg00687674	CTACAACTATGGCTTGTCTGAGTCCTGAGCCAGCAGAGCTCAGGCCACAGCACCTGCACC[CG]TTTTCTGCTGCTGCACACAAGGGCTCTGTGCATTCCGCATCCAGGTGTGCCCCTCCTCTT	15	67160314	F	MIR548H4;TMEM84	3.75767	-0.00243761	0.932719	-0.0844415	0.0844416	1202	TMEM84	Ewing sarcoma associated transcript 1	283673	chr15:69387981:69388030:+
20	cg00744433	TTCTCCAAGTAATTTTCATGTGCAGCCAGAATTGCAACTCACCAGGCTAAACTGCAGTTG[CG]CAATTCTGGTCTTCTTGATACCTGATTTCTTTGCCCCTTCTCTTTTCTGGTTCAATGCAT	21	17805938	R	CXADR	-1.4114	-0.0356428	0.216891	-1.23522	1.23549	1202	CXADR	coxsackie virus and adenovirus receptor	1525	chr21:18938824:18938873:+
20	cg00744433	TTCTCCAAGTAATTTTCATGTGCAGCCAGAATTGCAACTCACCAGGCTAAACTGCAGTTG[CG]CAATTCTGGTCTTCTTGATACCTGATTTCTTTGCCCCTTCTCTTTTCTGGTTCAATGCAT	21	17805938	R	CXADR	-1.4114	0.0308229	0.285625	1.06807	1.06824	1202	CXADR	coxsackie virus and adenovirus receptor pseudogene 2	1525	chr15:22014835:22014884:-
20	cg00744433	TTCTCCAAGTAATTTTCATGTGCAGCCAGAATTGCAACTCACCAGGCTAAACTGCAGTTG[CG]CAATTCTGGTCTTCTTGATACCTGATTTCTTTGCCCCTTCTCTTTTCTGGTTCAATGCAT	21	17805938	R	CXADR	-1.4114	0.00745471	0.796262	0.258243	0.258246	1202	CXADR	coxsackie virus and adenovirus receptor pseudogene 2	1525	chr15:22016710:22016759:-
20	cg00744433	TTCTCCAAGTAATTTTCATGTGCAGCCAGAATTGCAACTCACCAGGCTAAACTGCAGTTG[CG]CAATTCTGGTCTTCTTGATACCTGATTTCTTTGCCCCTTCTCTTTTCTGGTTCAATGCAT	21	17805938	R	CXADR	-1.4114	0.00442914	0.878084	0.153431	0.153432	1202	CXADR	coxsackie virus and adenovirus receptor pseudogene 2	1525	chr15:22015943:22015992:-
20	cg00744433	TTCTCCAAGTAATTTTCATGTGCAGCCAGAATTGCAACTCACCAGGCTAAACTGCAGTTG[CG]CAATTCTGGTCTTCTTGATACCTGATTTCTTTGCCCCTTCTCTTTTCTGGTTCAATGCAT	21	17805938	R	CXADR	-1.4114	0.00255897	0.929378	0.0886456	0.0886457	1202	CXADR	coxsackie virus and adenovirus receptor	1525	chr21:18939758:18939807:+
21	cg00845900	AATCCCCCTACCTTGATGTCTTCTCTTAGTAATCCCACTGATCCTCTCTGTTTTCTTTGC[CG]TATTCAGTGTTAAGCACAGTAAGTCTTTCCTACTGAAATAGCCATGGTCCTAATCATAAT	7	129718965	R	CPA4;CPA4	-8.58936	0.0353188	0.221101	1.22399	1.22424	1202	CPA4	carboxypeptidase A4	51200	chr7:129963680:129963729:+
22	cg00862290	ACTCAGTTCAAGGTTTATAAGAAGAGGAAATGTTTTGCCCTGGCCGCGTTTCCTTTTCCA[CG]TATTGTCTGTTAGAGTGCAAGCTGAAATAATGGGTTTTCTAGTTAATGGCATGTTCCAAT	3	180467667	F	KCNMB3;KCNMB3	-0.233767	0.0299437	0.299598	1.03759	1.03775	1202	KCNMB3	potassium calcium-activated channel subfamily M regulatory beta subunit 3	27094	chr3:178968748:178968797:-
22	cg00862290	ACTCAGTTCAAGGTTTATAAGAAGAGGAAATGTTTTGCCCTGGCCGCGTTTCCTTTTCCA[CG]TATTGTCTGTTAGAGTGCAAGCTGAAATAATGGGTTTTCTAGTTAATGGCATGTTCCAAT	3	180467667	F	KCNMB3;KCNMB3	-0.233767	0.0324559	0.260858	1.1247	1.1249	1202	KCNMB3	potassium calcium-activated channel subfamily M regulatory beta subunit 3	27094	chr3:178977024:178977073:-
22	cg00862290	ACTCAGTTCAAGGTTTATAAGAAGAGGAAATGTTTTGCCCTGGCCGCGTTTCCTTTTCCA[CG]TATTGTCTGTTAGAGTGCAAGCTGAAATAATGGGTTTTCTAGTTAATGGCATGTTCCAAT	3	180467667	F	KCNMB3;KCNMB3	-0.233767	0.0766114	0.00787808	2.65911	2.66172	1202	KCNMB3	potassium calcium-activated channel subfamily M regulatory beta subunit 3	27094	chr3:178960837:178960886:-
23	cg00943950	GCCCGGATGCGTCCCTCTTTCTCCACCCCGCCGAGCCTAAACTAGTGACGGGGAGGGAGA[CG]GGATAGTGTTTCTGTTTCGTGGTCTTTGAATCCACAACCTCTAGTCTGAACACAGAGAAC	5	133734820	F	UBE2B;UBE2B	33.477	-0.0120599	0.676171	-0.417786	0.417796	1202	UBE2B	ubiquitin conjugating enzyme E2 B	7320	chr5:133727732:133727781:+
24	cg00955230	CCCACTTTTCCAGATTGCTCTGAATGTCCTAGTGAGCTGCTCCCGTTGGGTAGGCTCCTG[CG]CCTCAACCGCGCTCGGTACTCGACGTTTATTATCAGGGAATTCTCGGCTGCAAGATGGGA	7	73307141	R	RFC2;RFC2	3.41792	0.0220077	0.445879	0.762493	0.762555	1202	RFC2	NA	NA	chr7:73247179:73247228:-
24	cg00955230	CCCACTTTTCCAGATTGCTCTGAATGTCCTAGTGAGCTGCTCCCGTTGGGTAGGCTCCTG[CG]CCTCAACCGCGCTCGGTACTCGACGTTTATTATCAGGGAATTCTCGGCTGCAAGATGGGA	7	73307141	R	RFC2;RFC2	3.41792	-0.0226521	0.432672	-0.784825	0.784892	1202	RFC2	replication factor C subunit 2	5982	chr7:73645930:73645979:-
24	cg00955230	CCCACTTTTCCAGATTGCTCTGAATGTCCTAGTGAGCTGCTCCCGTTGGGTAGGCTCCTG[CG]CCTCAACCGCGCTCGGTACTCGACGTTTATTATCAGGGAATTCTCGGCTGCAAGATGGGA	7	73307141	R	RFC2;RFC2	3.41792	-0.00869136	0.763399	-0.301085	0.301089	1202	RFC2	replication factor C subunit 2	5982	chr7:73660997:73661046:-
25	cg01056568	AGAAGGAACTCTGAAGACTCCGTAGATTGCTCTAGACCGCCTCAGACACTCTCGGCGCAG[CG]TGGAGAGGATTTGTGCAAACATTTCCTCTGTGGACCAAGAGGAATGCAAGAGGAGGCTGC	17	9669983	F	GLP2R	-0.326099	-0.00514425	0.858593	-0.178204	0.178204	1202	GLP2R	glucagon like peptide 2 receptor	9340	chr17:9792779:9792828:+
26	cg01114088	TCGCGGGTGATCTCCTGGCTCAGGGCCCGCATGCGGGAGTAGCAGGTCGGGGGAGTGGGC[CG]CGCGGCGGGGGCTCCCGCCAGGAGCAGCAGCAGCACGGGCAGAGGCCCAGGCGTCCTCAT	4	5072012	R	CYTL1	-0.226611	-0.0220822	0.444341	-0.765074	0.765136	1202	CYTL1	cytokine like 1	54360	chr4:5016785:5016834:-
27	cg01128603	TTGCCAGCTTAGTTGTAATTTCTTGTATCCATCTTGGTCCTCTTCAGTGCCCAGCCAGAG[CG]CTGGCAGACAGGCACTGGGTACGTTTTGTTGAATGAATTGGGAGCGAACGTCGTTTAGTG	11	65576967	R	SF3B2	-0.499181	0.0066025	0.819124	0.228721	0.228722	1202	SF3B2	splicing factor 3b subunit 2	10992	chr11:65835700:65835749:+
28	cg01131735	CTCCGTCGGCCCGGGCTCCTGCCTTGGGGGTGTCCCCTAGGTAGAGAATGCGTCGGGGAG[CG]CTTCCCGCCAGAGATGGGAAGCCCAGGAAGCCCCTCCCCATGCAAACAGTGCCCCCGCCT	17	37221945	R	FKBP10;SC65;SC65	-22.9147	0.00246643	0.931926	0.0854398	0.0854399	1202	FKBP10	FK506 binding protein 10	60681	chr17:39979097:39979146:+
29	cg01137065	CGTGTATATTTTTAAACTGTGTGCTGACGACAGTTAAGTAAATGTGATTCAGAACTTCTG[CG]TATTTTGCAGGACAGTTTTGACACAATGACATGACTCGCTAGCCAGGAAAGATAACGACA	17	78070299	F	FOXK2	14.3738	0.0104117	0.718393	0.360686	0.360692	1202	FOXK2	forkhead box K2	3607	chr17:80561608:80561657:+
29	cg01137065	CGTGTATATTTTTAAACTGTGTGCTGACGACAGTTAAGTAAATGTGATTCAGAACTTCTG[CG]TATTTTGCAGGACAGTTTTGACACAATGACATGACTCGCTAGCCAGGAAAGATAACGACA	17	78070299	F	FOXK2	14.3738	-0.0118806	0.680718	-0.411574	0.411584	1202	FOXK2	forkhead box K2	3607	chr17:80477881:80477930:+
29	cg01137065	CGTGTATATTTTTAAACTGTGTGCTGACGACAGTTAAGTAAATGTGATTCAGAACTTCTG[CG]TATTTTGCAGGACAGTTTTGACACAATGACATGACTCGCTAGCCAGGAAAGATAACGACA	17	78070299	F	FOXK2	14.3738	0.0481647	0.0950982	1.66977	1.67041	1202	FOXK2	NA	3607	chr17:80558063:80558112:+
30	cg01211097	TTCTTAATAATGAATGAACCAACGACCCCCAAGGCTGGTTTGCCCGTGCACACGCACGCA[CG]TGTGCAACACGTAGCACTTGCTGAGTGTTTGCTACTTGCCAGGCCTCATGTCAAGCACTT	16	83290470	F	USP10	-10.2752	-0.015677	0.587139	-0.543111	0.543133	1202	USP10	ubiquitin specific peptidase 10	9100	chr16:84812607:84812656:+
31	cg01221637	GGCCAGGAGAGGGAGACTTGGCCCAAATAAAGTGACTCAGGCACCCTCAGGAACTCTCGG[CG]CCCGGGGCCCCTTCGGGCAGCCTTCGACCCCCATGCGTCTTTCGGGTCCCCAGGGACGCG	20	30535605	R	C20orf112	-8.83856	0.0480615	0.0958104	1.66618	1.66682	1202	C20orf112	nucleolar protein 4 like	140688	chr20:31034826:31034875:-
32	cg01252496	CACTTTTCCTCCCCAGTACGTGGGAGCCCTAGAGGACATGTTGCAGGCCCTGAAGGTCCA[CG]CGAGGTGAGTGCAGGCAGCCTCAGGGCTTTCACATCAGCACGTGGCTGTGCTACTGGACA	19	17187655	R	USE1	2.34896	0.0083222	0.773167	0.288296	0.2883	1202	USE1	unconventional SNARE in the ER 1	55850	chr19:17328269:17328271:+,chr19:17329173:17329200:+,chr19:17330022:17330040:+
33	cg01254459	GGCGAACCCACCCCTCCAGGCAGGGTTTCGCCCCTCGCCCCGCCCCTTCCCCCGCCCGGA[CG]GCCATGGCCATTCCCGGCATCCCCTATGAGAGACGGCTTCTCATCATGGCGGACCCTAGA	14	52243641	F	PSMC6	19.1844	-0.00626641	0.828184	-0.217078	0.217079	1202	PSMC6	proteasome 26S subunit, ATPase 6	5706	chr14:53194261:53194310:+
33	cg01254459	GGCGAACCCACCCCTCCAGGCAGGGTTTCGCCCCTCGCCCCGCCCCTTCCCCCGCCCGGA[CG]GCCATGGCCATTCCCGGCATCCCCTATGAGAGACGGCTTCTCATCATGGCGGACCCTAGA	14	52243641	F	PSMC6	19.1844	0.0191581	0.506961	0.663736	0.663776	1202	PSMC6	proteasome 26S subunit, ATPase 6	5706	chr14:53187633:53187682:+
34	cg01261503	CAGTTTTAGTCCTTTACGGTGATTTGTAAGCCCAGGCCTTCTTAACTAGGCAAATGCTGC[CG]CCAGGTGGCCTAGGCCTAACCCCAGAGCCGTTGTCTTGACGCTTAAGCTTCCGGGGAGGG	17	59924061	R	POLG2	1.04747	-0.00710105	0.805729	-0.245992	0.245994	1202	POLG2	DNA polymerase gamma 2, accessory subunit	11232	chr17:62479036:62479072:-,chr17:62476494:62476506:-
35	cg01335367	ACGGGCAGGAATCTGTTGTAGAAGAGTTGCTGCCGGGACCTGCTGGTGAATTGGCTCCAC[CG]GATCCGGCTCCGCAGAAAGCTCACTGCTTCCTGTGGCTCCTGGATTTCCAAGCCTCTGGG	12	108656591	R	MGC14436;MGC14436;C12orf34	1.21111	0.0141804	0.623323	0.491257	0.491274	1202	C12orf34	family with sequence similarity 222 member A	84915	chr12:110208050:110208099:+
35	cg01335367	ACGGGCAGGAATCTGTTGTAGAAGAGTTGCTGCCGGGACCTGCTGGTGAATTGGCTCCAC[CG]GATCCGGCTCCGCAGAAAGCTCACTGCTTCCTGTGGCTCCTGGATTTCCAAGCCTCTGGG	12	108656591	R	MGC14436;MGC14436;C12orf34	1.21111	0.0135828	0.638036	0.470552	0.470567	1202	C12orf34	family with sequence similarity 222 member A	84915	chr12:110152243:110152292:+
36	cg01400401	AAGAAGCTAGGAGGGGAAATAAATTGAGTGGGGGTGGGGTTTCCCAAGAATCGGAGGAAC[CG]AGAACGAAGAGGGGTGGGGGAACGGGGAAAGAGAGAGGAAAATCAAGTTTTCTTCAGCAC	19	4720531	R	MIR7-3;C19orf30	4.00959	-0.0027865	0.923118	-0.0965273	0.0965274	1202	MIR7-3	microRNA 7-3	NA	chr19:4770731:4770780:+
37	cg01441777	TATGACACACCTATATTCACACAGTTGTGACTGTGGACACGCAAAATGCCTGAGGCCCTG[CG]TCCAATCCCGGAAGCACAGTTCCTGGGAGGAGTCACTTCTATAATAGCCGTATCTTCCCT	22	37044362	R	CSNK1E;CSNK1E	-8.74169	-0.159396	2.75959e-08	-5.56912	5.59314	1202	CSNK1E	casein kinase 1 epsilon	1454	chr22:38689274:38689323:-
37	cg01441777	TATGACACACCTATATTCACACAGTTGTGACTGTGGACACGCAAAATGCCTGAGGCCCTG[CG]TCCAATCCCGGAAGCACAGTTCCTGGGAGGAGTCACTTCTATAATAGCCGTATCTTCCCT	22	37044362	R	CSNK1E;CSNK1E	-8.74169	0.00906484	0.753554	0.314024	0.314028	1202	CSNK1E	casein kinase 1 epsilon	1454	chr22:38714035:38714084:-
37	cg01441777	TATGACACACCTATATTCACACAGTTGTGACTGTGGACACGCAAAATGCCTGAGGCCCTG[CG]TCCAATCCCGGAAGCACAGTTCCTGGGAGGAGTCACTTCTATAATAGCCGTATCTTCCCT	22	37044362	R	CSNK1E;CSNK1E	-8.74169	-0.0990745	0.00058216	-3.44334	3.44901	1202	CSNK1E	casein kinase 1 epsilon	1454	chr22:38687119:38687168:-
39	cg01459453	GCAAGTTTAAAAGTACTCACAAAATCTAATAGGCAATTCAACATAAAACTCCATGGCTAT[CG]CTGTTCCTCACTTTCTGAACCTTTACCTGCCTGACTTTACTCCATACCACTCCAACTCAC	1	167865836	R	SELP	-0.294799	-0.0306501	0.288336	-1.06208	1.06225	1202	SELP	selectin P	6403	chr1:169558180:169558229:-
40	cg01511567	GTAGTTTTATTGTATCAGACTTAGTACAGGGGTGGGGTGGGGGTGTGTATTGGAATGATG[CG]TGCCCGTTTCTCTGCAAAATAGTTTCTATGTCATGGAAAGGAGTCGATGGGACAAGAAGA	11	56860207	F	SSRP1	-0.95566	0.0211596	0.463608	0.733098	0.733153	1202	SSRP1	structure specific recognition protein 1	6749	chr11:57093632:57093681:-
41	cg01519742	CAGCCCCGCGCCGCATCCTCCGGCCGCCCCCTCCCCGCTGCGAGCTTACGCCGCTGTCGC[CG]CCGCCACCGCCTTAAAAAGGACAAAACGGAACAGAAAATGAATGCATGCACAAAAAAAAT	4	6252992	F	JAKMIP1;JAKMIP1;JAKMIP1;JAKMIP1	7.24759	0.0259584	0.368553	0.899426	0.899527	1202	JAKMIP1	janus kinase and microtubule interacting protein 1	152789	chr4:6202092:6202141:-
41	cg01519742	CAGCCCCGCGCCGCATCCTCCGGCCGCCCCCTCCCCGCTGCGAGCTTACGCCGCTGTCGC[CG]CCGCCACCGCCTTAAAAAGGACAAAACGGAACAGAAAATGAATGCATGCACAAAAAAAAT	4	6252992	F	JAKMIP1;JAKMIP1;JAKMIP1;JAKMIP1	7.24759	-0.0144982	0.61556	-0.502266	0.502283	1202	JAKMIP1	NA	152789	chr4:6064120:6064142:-,chr4:6062210:6062234:-
41	cg01519742	CAGCCCCGCGCCGCATCCTCCGGCCGCCCCCTCCCCGCTGCGAGCTTACGCCGCTGTCGC[CG]CCGCCACCGCCTTAAAAAGGACAAAACGGAACAGAAAATGAATGCATGCACAAAAAAAAT	4	6252992	F	JAKMIP1;JAKMIP1;JAKMIP1;JAKMIP1	7.24759	0.0453577	0.116016	1.57232	1.57286	1202	JAKMIP1	NA	152789	chr4:6152081:6152130:-
41	cg01519742	CAGCCCCGCGCCGCATCCTCCGGCCGCCCCCTCCCCGCTGCGAGCTTACGCCGCTGTCGC[CG]CCGCCACCGCCTTAAAAAGGACAAAACGGAACAGAAAATGAATGCATGCACAAAAAAAAT	4	6252992	F	JAKMIP1;JAKMIP1;JAKMIP1;JAKMIP1	7.24759	-0.0619232	0.0318175	-2.14783	2.14921	1202	JAKMIP1	NA	152789	chr4:6196250:6196299:-
42	cg01623187	ATGATAGGTGTGAGCCCCTGCGCTTTGCCAGGGCTGGTTTTTGGATGTGATTCTCAGGGC[CG]TCTTTCTTTACCCTTCTGCTCTGCTGAGGCCCACAGCAGCCTAGTCTCCTTGGGTGTGGG	20	41789553	R	GTSF1L;GTSF1L	-3.80628	0.0126793	0.660553	0.439247	0.439258	1202	GTSF1L	gametocyte specific factor 1 like	149699	chr20:42355106:42355155:-
42	cg01623187	ATGATAGGTGTGAGCCCCTGCGCTTTGCCAGGGCTGGTTTTTGGATGTGATTCTCAGGGC[CG]TCTTTCTTTACCCTTCTGCTCTGCTGAGGCCCACAGCAGCCTAGTCTCCTTGGGTGTGGG	20	41789553	R	GTSF1L;GTSF1L	-3.80628	0.00807489	0.779732	0.279728	0.279731	1202	GTSF1L	gametocyte specific factor 1 like	149699	chr20:42354995:42355044:-
43	cg01626227	TGCTGGGTATCCGCGCCGGAACCGCGAGGGGGTTGGTTCAGGCCTAGGCGCGGGGCAGGA[CG]GGACCGGTGAGTGGCTCCTCCAAACAGCTATAGAGACCCAGAAATGCCTGTGGAAAGCTA	7	99355225	F	TRIM4;TRIM4	-5.64066	0.0185698	0.520094	0.643352	0.643389	1202	TRIM4	tripartite motif containing 4	89122	chr7:99488697:99488746:-
43	cg01626227	TGCTGGGTATCCGCGCCGGAACCGCGAGGGGGTTGGTTCAGGCCTAGGCGCGGGGCAGGA[CG]GGACCGGTGAGTGGCTCCTCCAAACAGCTATAGAGACCCAGAAATGCCTGTGGAAAGCTA	7	99355225	F	TRIM4;TRIM4	-5.64066	-0.0763633	0.0080821	-2.65046	2.65305	1202	TRIM4	tripartite motif containing 4	89122	chr7:99488196:99488245:-
44	cg01651821	CAGAACCTGCAGGAGCAGATCAATCCCCTCTTGGTAACACACCAGAGCCTGCGGATACCG[CG]ACTCCGAATCTAGTTCTACTGCCCGCTTTAGCACAGTGGCTGCAGCTGTGCTCTGCGGGT	2	99163790	F	MRPL30;MITD1	12.4345	0.00589524	0.838216	0.204219	0.204221	1202	MITD1	microtubule interacting and trafficking domain containing 1	129531	chr2:99787806:99787821:-,chr2:99787082:99787115:-
44	cg01651821	CAGAACCTGCAGGAGCAGATCAATCCCCTCTTGGTAACACACCAGAGCCTGCGGATACCG[CG]ACTCCGAATCTAGTTCTACTGCCCGCTTTAGCACAGTGGCTGCAGCTGTGCTCTGCGGGT	2	99163790	F	MRPL30;MITD1	12.4345	0.0490498	0.0891678	1.7005	1.70118	1202	MRPL30	mitochondrial ribosomal protein L30	51263	chr2:99813201:99813250:+
44	cg01651821	CAGAACCTGCAGGAGCAGATCAATCCCCTCTTGGTAACACACCAGAGCCTGCGGATACCG[CG]ACTCCGAATCTAGTTCTACTGCCCGCTTTAGCACAGTGGCTGCAGCTGTGCTCTGCGGGT	2	99163790	F	MRPL30;MITD1	12.4345	0.018593	0.519574	0.644156	0.644193	1202	MRPL30	mitochondrial ribosomal protein L30	51263	chr2:99811222:99811271:+
45	cg01918706	CTTCTAGTGGCAAATTTCTCCCTGCTGTGGCAGGAGGACGGCTCGGGGGAGCTCTGACCA[CG]ATTTCATGCAAAGATACGGTGAGACCCTCCGCTCAACAGTGGCTTTTCTAAGGCTCTCCT	1	200577464	F	UBE2T	0.48113	-0.0182479	0.527356	-0.632197	0.632232	1202	UBE2T	ubiquitin conjugating enzyme E2 T	29089	chr1:202302149:202302198:-
46	cg01930621	ACATGGGCTTCTCTTCGAGGAGGTAACATGTCCGCGCCCTGAGCCACGGCTCTCTGGGCG[CG]GCCATCTTGGTAGATCTGCCGTACAGAAGGGAAACAGTTGTTCTTGTGTCATTAAACCGG	19	57100162	F	ZNF649	-21.7879	-0.0212771	0.461129	-0.737171	0.737226	1202	ZNF649	zinc finger protein 649	65251	chr19:52392686:52392735:-
47	cg01946401	GCTTTTTTGGATTGTGTGAATGCTTCATTCGCCTCACAAACAACCACAGAACCACAAGTG[CG]GTGCAAACTTTCTCCAGGAGGACAGCAAGAAGTCTCTGGTTTTTAAATGGTTAATCTCCG	6	45404079	F	SUPT3H;SUPT3H;RUNX2;RUNX2;RUNX2;RUNX2	-1.55239	0.0584245	0.0428476	2.02619	2.02735	1202	RUNX2	runt related transcription factor 2	860	chr6:45516753:45516802:+
47	cg01946401	GCTTTTTTGGATTGTGTGAATGCTTCATTCGCCTCACAAACAACCACAGAACCACAAGTG[CG]GTGCAAACTTTCTCCAGGAGGACAGCAAGAAGTCTCTGGTTTTTAAATGGTTAATCTCCG	6	45404079	F	SUPT3H;SUPT3H;RUNX2;RUNX2;RUNX2;RUNX2	-1.55239	0.0657531	0.0226227	2.28104	2.28269	1202	RUNX2	runt related transcription factor 2	860	chr6:45518191:45518240:+
47	cg01946401	GCTTTTTTGGATTGTGTGAATGCTTCATTCGCCTCACAAACAACCACAGAACCACAAGTG[CG]GTGCAAACTTTCTCCAGGAGGACAGCAAGAAGTCTCTGGTTTTTAAATGGTTAATCTCCG	6	45404079	F	SUPT3H;SUPT3H;RUNX2;RUNX2;RUNX2;RUNX2	-1.55239	-0.0556518	0.0537399	-1.92983	1.93083	1202	RUNX2	runt related transcription factor 2	860	chr6:45390187:45390236:+
47	cg01946401	GCTTTTTTGGATTGTGTGAATGCTTCATTCGCCTCACAAACAACCACAGAACCACAAGTG[CG]GTGCAAACTTTCTCCAGGAGGACAGCAAGAAGTCTCTGGTTTTTAAATGGTTAATCTCCG	6	45404079	F	SUPT3H;SUPT3H;RUNX2;RUNX2;RUNX2;RUNX2	-1.55239	0.0624394	0.0304163	2.16578	2.16719	1202	SUPT3H	SPT3 homolog, SAGA and STAGA complex component	8464	chr6:44796659:44796708:-
47	cg01946401	GCTTTTTTGGATTGTGTGAATGCTTCATTCGCCTCACAAACAACCACAGAACCACAAGTG[CG]GTGCAAACTTTCTCCAGGAGGACAGCAAGAAGTCTCTGGTTTTTAAATGGTTAATCTCCG	6	45404079	F	SUPT3H;SUPT3H;RUNX2;RUNX2;RUNX2;RUNX2	-1.55239	0.0198398	0.491959	0.687363	0.687408	1202	SUPT3H	SPT3 homolog, SAGA and STAGA complex component	8464	chr6:44921047:44921068:-,chr6:44900473:44900500:-
48	cg02016419	AGAGGCCTCGGTGATTTCCCGACCTCTCCTGTGAAGCCTGATTCGGAACTCTTCCAGCTG[CG]AAGAACTTGGCCGATTCTAAGGCACATCAGGGCTGCCTGGAACCCTAACACCTGCCTAGG	17	15185962	F	TEKT3	7.24698	-0.0269794	0.35001	-0.934822	0.934936	1202	TEKT3	tektin 3	64518	chr17:15207417:15207466:-
49	cg02071305	TGCCTGATGGATAATCCATCACTTGCTTTTCTAGTATGAATGGTCTATTTACGGGTCCAG[CG]CCCCTGCTGGCTTACGACCTTTTCCAGGGCGGGGAGGGGCTGTCCTCATCTCTGTGACCC	15	38973265	R	VPS18	-3.88641	0.0297973	0.301967	1.03252	1.03267	1202	VPS18	VPS18, CORVET/HOPS core subunit	57617	chr15:41195831:41195880:+
50	cg02151301	ACTGCGCCCAGCCCATTTTACAGACTTTTATTTTGTTCAGTTTCTTTATTGTCTTCCCAA[CG]TCCCCCCACACACACTGCACTAAAATGCAAACTTCACGAAGGCAAGGAGGAACTTTTGCC	20	29565446	R	HM13;HM13;HM13;HM13	-6.96255	-0.013532	0.639294	-0.468791	0.468806	1202	HM13	histocompatibility minor 13	81502	chr20:30127057:30127106:+
50	cg02151301	ACTGCGCCCAGCCCATTTTACAGACTTTTATTTTGTTCAGTTTCTTTATTGTCTTCCCAA[CG]TCCCCCCACACACACTGCACTAAAATGCAAACTTCACGAAGGCAAGGAGGAACTTTTGCC	20	29565446	R	HM13;HM13;HM13;HM13	-6.96255	0.0937979	0.0011309	3.25883	3.26364	1202	HM13	histocompatibility minor 13	81502	chr20:30156030:30156079:+
50	cg02151301	ACTGCGCCCAGCCCATTTTACAGACTTTTATTTTGTTCAGTTTCTTTATTGTCTTCCCAA[CG]TCCCCCCACACACACTGCACTAAAATGCAAACTTCACGAAGGCAAGGAGGAACTTTTGCC	20	29565446	R	HM13;HM13;HM13;HM13	-6.96255	5.0801e-05	0.998596	0.0017598	0.0017598	1202	HM13	histocompatibility minor 13	81502	chr20:30126007:30126056:+
50	cg02151301	ACTGCGCCCAGCCCATTTTACAGACTTTTATTTTGTTCAGTTTCTTTATTGTCTTCCCAA[CG]TCCCCCCACACACACTGCACTAAAATGCAAACTTCACGAAGGCAAGGAGGAACTTTTGCC	20	29565446	R	HM13;HM13;HM13;HM13	-6.96255	0.0209556	0.46793	0.726029	0.726082	1202	HM13	histocompatibility minor 13	81502	chr20:30127123:30127172:+
51	cg02154074	TGGGGAACGCGAGTGGGGACAGGGGGGCCTTCAGCTGGGCCCCAGGGAACCGCCCCGTGG[CG]CTCTCGGCCTCGCTCTCACTCACGGTGCTACAGGTGGTAAGCAAATTGACTATGTTGTGG	2	74609742	F	HTRA2;HTRA2;AUP1	6.19904	-0.0996762	0.000538599	-3.46439	3.47017	1202	AUP1	NA	550	chr2:74756125:74756173:-
51	cg02154074	TGGGGAACGCGAGTGGGGACAGGGGGGCCTTCAGCTGGGCCCCAGGGAACCGCCCCGTGG[CG]CTCTCGGCCTCGCTCTCACTCACGGTGCTACAGGTGGTAAGCAAATTGACTATGTTGTGG	2	74609742	F	HTRA2;HTRA2;AUP1	6.19904	0.0597478	0.0383454	2.07219	2.07343	1202	AUP1	ancient ubiquitous protein 1	550	chr2:74754068:74754078:-,chr2:74753925:74753963:-
51	cg02154074	TGGGGAACGCGAGTGGGGACAGGGGGGCCTTCAGCTGGGCCCCAGGGAACCGCCCCGTGG[CG]CTCTCGGCCTCGCTCTCACTCACGGTGCTACAGGTGGTAAGCAAATTGACTATGTTGTGG	2	74609742	F	HTRA2;HTRA2;AUP1	6.19904	-0.00737043	0.798515	-0.255324	0.255326	1202	HTRA2	HtrA serine peptidase 2	27429	chr2:74758110:74758159:+
51	cg02154074	TGGGGAACGCGAGTGGGGACAGGGGGGCCTTCAGCTGGGCCCCAGGGAACCGCCCCGTGG[CG]CTCTCGGCCTCGCTCTCACTCACGGTGCTACAGGTGGTAAGCAAATTGACTATGTTGTGG	2	74609742	F	HTRA2;HTRA2;AUP1	6.19904	-0.0347839	0.228178	-1.20544	1.20568	1202	HTRA2	HtrA serine peptidase 2	27429	chr2:74758996:74759045:+
52	cg02197293	CAGCCCCCCTCGGCGGCCGCACCGACACCGCACCCCAAGTCCTACCCCGGGGCCTGGCGG[CG]CTCCTCGCCGGGATGCCCTAGCTGTGCCGCAAGCTCCCCACGCCCCTCTGCGTCCTTTTT	19	44214998	F	FBXO27;FBXO27	1.32648	0.0362625	0.208999	1.25672	1.257	1202	FBXO27	F-box protein 27	126433	chr19:39515592:39515641:-
53	cg02228185	AGGAACCCATGGGAATGAGCTAACCGGAGTATTTCTGGTTAAGCATTGGCTAGAGAATGG[CG]CTGAGATTCAGAGAACAGGGCTGGAGGTAAAACCATTTATTACTAACCCCAGAGCAGTGA	17	3326317	F	ASPA;ASPA	-7.78534	0.0285227	0.323128	0.988322	0.988456	1202	ASPA	aspartoacylase	443	chr17:3402230:3402279:+
54	cg02229946	GTGTGCAGAATTTATATATATAAATATATCTCCTCCAACCCCTCCCAATGAAGCAAGTCA[CG]TGAGTCAATCCTACCCTAAGATATTAGGGATTGAGCCTCCTGGGACATTTGGTGGCTTAG	2	113386383	F	IL1F7;IL1F7;IL1F7;IL1F7	10.5122	-0.0116883	0.685607	-0.404913	0.404922	1202	IL1F7	interleukin 37	27178	chr2:113672772:113672821:+
54	cg02229946	GTGTGCAGAATTTATATATATAAATATATCTCCTCCAACCCCTCCCAATGAAGCAAGTCA[CG]TGAGTCAATCCTACCCTAAGATATTAGGGATTGAGCCTCCTGGGACATTTGGTGGCTTAG	2	113386383	F	IL1F7;IL1F7;IL1F7;IL1F7	10.5122	0.0334931	0.245919	1.16067	1.16089	1202	IL1F7	interleukin 37	27178	chr2:113675217:113675266:+
54	cg02229946	GTGTGCAGAATTTATATATATAAATATATCTCCTCCAACCCCTCCCAATGAAGCAAGTCA[CG]TGAGTCAATCCTACCCTAAGATATTAGGGATTGAGCCTCCTGGGACATTTGGTGGCTTAG	2	113386383	F	IL1F7;IL1F7;IL1F7;IL1F7	10.5122	0.00159699	0.955891	0.0553215	0.0553216	1202	IL1F7	interleukin 37	27178	chr2:113676141:113676190:+
55	cg02309431	GTGGGAGGTCCTTATGCTAGGAGACCTAATGTCTGTGCCTCAGTTTCTCTATCGGAGAGG[CG]ATGTCTCAAGAGGCCTTTCAGGGCTCAGAGTTGAGCTTTCTGAGTTCCACATGGAAGTGA	20	31082592	F	BPIL3	-5.60994	0.0413587	0.151852	1.43352	1.43393	1202	BPIL3	BPI fold containing family B member 6	128859	chr20:31631152:31631173:+,chr20:31631821:31631848:+
56	cg02480835	GAACGACTCAGTCTCTCAAATCATAGCTAATTCTCCTCTGAGGGCCTTGCTGAAGTTCTG[CG]TTTGCTTGCTCCGCTTTCCTCTCATTTTGGACCTCCAGCCTTCCTGTAGTCCGAGGCCCT	7	23187879	R	NUPL2	1.53111	-0.00883841	0.759518	-0.306179	0.306183	1202	NUPL2	nucleoporin like 2	11097	chr7:23240192:23240241:+
56	cg02480835	GAACGACTCAGTCTCTCAAATCATAGCTAATTCTCCTCTGAGGGCCTTGCTGAAGTTCTG[CG]TTTGCTTGCTCCGCTTTCCTCTCATTTTGGACCTCCAGCCTTCCTGTAGTCCGAGGCCCT	7	23187879	R	NUPL2	1.53111	0.0218956	0.448201	0.758606	0.758666	1202	NUPL2	nucleoporin like 2	11097	chr7:23240107:23240156:+
57	cg02503970	CCTCCGGTCTAGGGCTCTTTGTCTTTGCAAAGTGTCGAAACTGTCTGGCATAGTGGGCTC[CG]CCGGCGGAGGCTGGAGCCGAGGAAGCGAGGAGGCGGGATGAGGGTGGGAGAGGGCTCGGG	8	134653327	R	ST3GAL1;ST3GAL1;ST3GAL1;ST3GAL1	25.5851	0.00743199	0.796869	0.257456	0.257459	1202	ST3GAL1	ST3 beta-galactoside alpha-2,3-sialyltransferase 1	6482	chr8:134467424:134467473:-
57	cg02503970	CCTCCGGTCTAGGGCTCTTTGTCTTTGCAAAGTGTCGAAACTGTCTGGCATAGTGGGCTC[CG]CCGGCGGAGGCTGGAGCCGAGGAAGCGAGGAGGCGGGATGAGGGTGGGAGAGGGCTCGGG	8	134653327	R	ST3GAL1;ST3GAL1;ST3GAL1;ST3GAL1	25.5851	-0.0039377	0.891523	-0.136406	0.136407	1202	ST3GAL1	ST3 beta-galactoside alpha-2,3-sialyltransferase 1	6482	chr8:134471491:134471540:-
57	cg02503970	CCTCCGGTCTAGGGCTCTTTGTCTTTGCAAAGTGTCGAAACTGTCTGGCATAGTGGGCTC[CG]CCGGCGGAGGCTGGAGCCGAGGAAGCGAGGAGGCGGGATGAGGGTGGGAGAGGGCTCGGG	8	134653327	R	ST3GAL1;ST3GAL1;ST3GAL1;ST3GAL1	25.5851	0.0265278	0.358138	0.919165	0.919273	1202	ST3GAL1	ST3 beta-galactoside alpha-2,3-sialyltransferase 1	6482	chr8:134488382:134488431:-
58	cg02631957	TGCCCGAGGCAGAAGGATGTTTGACCTCCGGATAAGCGAGGCGCTGCTGTGCATTCATTC[CG]GGCTGCATCGGTGGCGACAGCAGAGGCTCGGGCGGCGACTCTCCGGCCAGCGGCGGCGGT	5	122875865	R	CSNK1G3;CSNK1G3;CSNK1G3;CSNK1G3;CSNK1G3;CSNK1G3;CSNK1G3;CSNK1G3	-7.43545	0.012731	0.659255	0.44104	0.441052	1202	CSNK1G3	casein kinase 1 gamma 2	1455	chr19:1981255:1981304:+
58	cg02631957	TGCCCGAGGCAGAAGGATGTTTGACCTCCGGATAAGCGAGGCGCTGCTGTGCATTCATTC[CG]GGCTGCATCGGTGGCGACAGCAGAGGCTCGGGCGGCGACTCTCCGGCCAGCGGCGGCGGT	5	122875865	R	CSNK1G3;CSNK1G3;CSNK1G3;CSNK1G3;CSNK1G3;CSNK1G3;CSNK1G3;CSNK1G3	-7.43545	0.00965336	0.738123	0.334412	0.334418	1202	CSNK1G3	casein kinase 1 gamma 3	1456	chr5:122930756:122930805:+
58	cg02631957	TGCCCGAGGCAGAAGGATGTTTGACCTCCGGATAAGCGAGGCGCTGCTGTGCATTCATTC[CG]GGCTGCATCGGTGGCGACAGCAGAGGCTCGGGCGGCGACTCTCCGGCCAGCGGCGGCGGT	5	122875865	R	CSNK1G3;CSNK1G3;CSNK1G3;CSNK1G3;CSNK1G3;CSNK1G3;CSNK1G3;CSNK1G3	-7.43545	-0.0303704	0.292761	-1.05238	1.05255	1202	CSNK1G3	casein kinase 1 gamma 3	1456	chr5:122951502:122951551:+
58	cg02631957	TGCCCGAGGCAGAAGGATGTTTGACCTCCGGATAAGCGAGGCGCTGCTGTGCATTCATTC[CG]GGCTGCATCGGTGGCGACAGCAGAGGCTCGGGCGGCGACTCTCCGGCCAGCGGCGGCGGT	5	122875865	R	CSNK1G3;CSNK1G3;CSNK1G3;CSNK1G3;CSNK1G3;CSNK1G3;CSNK1G3;CSNK1G3	-7.43545	-0.0163465	0.571273	-0.566309	0.566334	1202	CSNK1G3	casein kinase 1 gamma 3	1456	chr5:122950666:122950715:+
58	cg02631957	TGCCCGAGGCAGAAGGATGTTTGACCTCCGGATAAGCGAGGCGCTGCTGTGCATTCATTC[CG]GGCTGCATCGGTGGCGACAGCAGAGGCTCGGGCGGCGACTCTCCGGCCAGCGGCGGCGGT	5	122875865	R	CSNK1G3;CSNK1G3;CSNK1G3;CSNK1G3;CSNK1G3;CSNK1G3;CSNK1G3;CSNK1G3	-7.43545	-0.0103262	0.72061	-0.357722	0.357728	1202	CSNK1G3	casein kinase 1 gamma 2	1455	chr19:1978862:1978911:+
59	cg02735486	ACTGTTCAAAATGATGAACGAAGATGCAGCTCAGAAAAGCGACAGTGGAGAGAAGTTCAA[CG]GCAGTAGTCAGAGGAGAAAAAGACCCAAGAAGGTAAATCGCCGGAATTAGGAATGTCTGT	4	114190384	F	ANK2;ANK2;ANK2	4.59477	0.018667	0.517913	0.64672	0.646757	1202	ANK2	ankyrin 2	287	chr4:114304515:114304564:+
59	cg02735486	ACTGTTCAAAATGATGAACGAAGATGCAGCTCAGAAAAGCGACAGTGGAGAGAAGTTCAA[CG]GCAGTAGTCAGAGGAGAAAAAGACCCAAGAAGGTAAATCGCCGGAATTAGGAATGTCTGT	4	114190384	F	ANK2;ANK2;ANK2	4.59477	0.00966325	0.737864	0.334755	0.33476	1202	ANK2	ankyrin 2	287	chr4:114279992:114280041:+
60	cg02802055	TCCAGTTTTAATCTTTAAAAAGAAGAAGAAGCAGCAATGCATAAGCTGAGTGATTCCCCG[CG]GAATCCAAAGCTAACAGAGCCAATAAGGCACCTTCGAGGGCATCCCAGCCCAGCTACTGA	9	131636915	F	C9orf78;USP20;USP20;USP20	-24.1172	-0.0291916	0.311906	-1.01151	1.01166	1202	C9orf78	chromosome 9 open reading frame 78	51759	chr9:132589712:132589761:-
60	cg02802055	TCCAGTTTTAATCTTTAAAAAGAAGAAGAAGCAGCAATGCATAAGCTGAGTGATTCCCCG[CG]GAATCCAAAGCTAACAGAGCCAATAAGGCACCTTCGAGGGCATCCCAGCCCAGCTACTGA	9	131636915	F	C9orf78;USP20;USP20;USP20	-24.1172	0.0217225	0.451798	0.752607	0.752666	1202	USP20	ubiquitin specific peptidase 20	10868	chr9:132642651:132642700:+
60	cg02802055	TCCAGTTTTAATCTTTAAAAAGAAGAAGAAGCAGCAATGCATAAGCTGAGTGATTCCCCG[CG]GAATCCAAAGCTAACAGAGCCAATAAGGCACCTTCGAGGGCATCCCAGCCCAGCTACTGA	9	131636915	F	C9orf78;USP20;USP20;USP20	-24.1172	-0.056763	0.0491252	-1.96844	1.9695	1202	USP20	ubiquitin specific peptidase 20	10868	chr9:132643737:132643786:+
61	cg02976574	CTCTTGCAGGAAGCCAGTTGAGGGAAGTTCTCCATGAATGTACGTCACAATGATGATGAC[CG]ACCAAATCCCTCTGGAACTGCCACCATTGCTGAACGGAGAGGTAGCCATGATGCCCCACT	3	173312987	F	FNDC3B;FNDC3B	8.05745	-0.0364831	0.206241	-1.26437	1.26465	1202	FNDC3B	fibronectin type III domain containing 3B	64778	chr3:172117938:172117987:+
61	cg02976574	CTCTTGCAGGAAGCCAGTTGAGGGAAGTTCTCCATGAATGTACGTCACAATGATGATGAC[CG]ACCAAATCCCTCTGGAACTGCCACCATTGCTGAACGGAGAGGTAGCCATGATGCCCCACT	3	173312987	F	FNDC3B;FNDC3B	8.05745	-0.0431028	0.135305	-1.49405	1.49451	1202	FNDC3B	fibronectin type III domain containing 3B	64778	chr3:172118002:172118051:+
63	cg03112869	TTCTTTCTCCTCCACTGCAAAGTTAAATGCGAGAAGGTAGAAACCCAGAGGCCATGCTGG[CG]CTGAGAGATGAGCCCCACTCACCAGATTCAAGATCCCAAGGTAGGCACAGACACAGGGCA	3	48388773	F	FBXW12;FBXW12;FBXW12;FBXW12;FBXW12;FBXW12	9.30996	-0.0284951	0.323597	-0.987366	0.9875	1202	FBXW12	F-box and WD repeat domain containing 12	285231	chr3:48423317:48423366:+
64	cg03172991	TGGAAGGTGTCAGCGTGTGGCTGTGTGATCTTGCATGTGTCTGTGTTCTGCAGGAACATG[CG]TCAGTGTGTGTGCATCAGTGTGCATCTCTATGTGTCATGCACTGGTGTGTCTTCGTGTAT	19	12966728	F	NFIX	-11.9695	0.0191237	0.507722	0.662546	0.662587	1202	NFIX	nuclear factor I X	4784	chr19:13209426:13209475:+
65	cg03258472	AAAGTGTTGGGATTACAGGCGTGAGCCATTGCGCCTGGGCAGGTATTTTTTCTCATTAAG[CG]CTCCCCATCCAAGTCTGCCCTAGGCAGGAGTGCCTAGTGCACGGGTACATACATACCCCG	19	6414949	F	CRB3;CRB3	-3.30181	0.0583709	0.0430392	2.02433	2.02548	1202	CRB3	crumbs 3, cell polarity complex component	92359	chr19:6466882:6466931:+
65	cg03258472	AAAGTGTTGGGATTACAGGCGTGAGCCATTGCGCCTGGGCAGGTATTTTTTCTCATTAAG[CG]CTCCCCATCCAAGTCTGCCCTAGGCAGGAGTGCCTAGTGCACGGGTACATACATACCCCG	19	6414949	F	CRB3;CRB3	-3.30181	-0.020653	0.474382	-0.715542	0.715592	1202	CRB3	crumbs 3, cell polarity complex component	92359	chr19:6465587:6465629:+,chr19:6466477:6466483:+
65	cg03258472	AAAGTGTTGGGATTACAGGCGTGAGCCATTGCGCCTGGGCAGGTATTTTTTCTCATTAAG[CG]CTCCCCATCCAAGTCTGCCCTAGGCAGGAGTGCCTAGTGCACGGGTACATACATACCCCG	19	6414949	F	CRB3;CRB3	-3.30181	-0.00911979	0.752109	-0.315928	0.315932	1202	CRB3	crumbs 3, cell polarity complex component	92359	chr19:6467018:6467067:+
66	cg03340261	AGGGCGTTTGCCACAGCCCCTTAACTCCTTCCAAAACACTCCGCTTAGATACTGATAAGG[CG]CCAACTGCAGCCTGGAGAACCCCTATGCGCCATCTTGGCTTCCCGCAGGCCTCTGCGCCG	6	135417593	F	HBS1L;HBS1L;HBS1L;HBS1L;HBS1L;HBS1L	13.5737	-0.0152649	0.597004	-0.528834	0.528855	1202	HBS1L	HBS1 like translational GTPase	10767	chr6:135281739:135281788:-
66	cg03340261	AGGGCGTTTGCCACAGCCCCTTAACTCCTTCCAAAACACTCCGCTTAGATACTGATAAGG[CG]CCAACTGCAGCCTGGAGAACCCCTATGCGCCATCTTGGCTTCCCGCAGGCCTCTGCGCCG	6	135417593	F	HBS1L;HBS1L;HBS1L;HBS1L;HBS1L;HBS1L	13.5737	-0.0122633	0.671026	-0.424834	0.424845	1202	HBS1L	HBS1 like translational GTPase	10767	chr6:135281967:135282016:-
67	cg03387497	CAGCCTCTTCCTGCTGTGTCACCATCTGCGGGAGGTGGTACTCTAGTCTCCCCTAAGACT[CG]GCTTGCCACCTGCACCAGCTCCCTGGGCAAAGGTCACCTGTGTTCTTAATAGAGCAGAGA	20	17628945	F	BANF2;BANF2;BANF2	4.63	0.0271043	0.347783	0.939151	0.939266	1202	BANF2	barrier to autointegration factor 2	140836	chr20:17705700:17705749:+
67	cg03387497	CAGCCTCTTCCTGCTGTGTCACCATCTGCGGGAGGTGGTACTCTAGTCTCCCCTAAGACT[CG]GCTTGCCACCTGCACCAGCTCCCTGGGCAAAGGTCACCTGTGTTCTTAATAGAGCAGAGA	20	17628945	F	BANF2;BANF2;BANF2	4.63	-0.0346168	0.230422	-1.19964	1.19988	1202	BANF2	barrier to autointegration factor 2	140836	chr20:17703473:17703522:+
68	cg03535648	ATGGAGTATGTATATGTTCAGCTTTACTAATGCCAAAATGTTTTCCAACATAGTTGTAAG[CG]ATTTGTGCCCTCGATAAGCAGGGTATGAGAATTTCCATTGTTCCATGTCCTAGCTGACTC	12	101116609	F	PMCH	-15.9514	0.0409256	0.15619	1.4185	1.41889	1202	PMCH	pro-melanin concentrating hormone	5367	chr12:102590409:102590458:-
68	cg03535648	ATGGAGTATGTATATGTTCAGCTTTACTAATGCCAAAATGTTTTCCAACATAGTTGTAAG[CG]ATTTGTGCCCTCGATAAGCAGGGTATGAGAATTTCCATTGTTCCATGTCCTAGCTGACTC	12	101116609	F	PMCH	-15.9514	0.0184815	0.522081	0.640292	0.640328	1202	PMCH	pro-melanin concentrating hormone	5367	chr12:102591356:102591405:-
69	cg03565081	CAAATCTCTCTGCTTCCTTCGATGTTGCCTGTGGCAGAAATTTACATTATCCCTTCAGCC[CG]CTTAAAAAATTCTGTACTTCCCAAGCGGCTAAATTTTTAAAGTCCCTCAACCACAAAAAT	14	22548810	R	C14orf93;C14orf93;C14orf93	7.76301	0.0265377	0.357959	0.919507	0.919615	1202	C14orf93	chromosome 14 open reading frame 93	60686	chr14:23456466:23456515:-
70	cg03623878	AAGTAGAGAGGCAGCCGGGAGCCTGCCTTCTGTGTTCTCGGTGCAGGGGTATTCTGAGAA[CG]GCCCCTGCTCACACGGGTTTAAAAGGAACTCAGTGACCACAGACGGATGAGAACAGCGGA	13	112703561	F	MCF2L;MCF2L	1.94375	-0.00501999	0.861974	-0.173899	0.1739	1202	MCF2L	NA	23263	chr13:113744317:113744366:+
70	cg03623878	AAGTAGAGAGGCAGCCGGGAGCCTGCCTTCTGTGTTCTCGGTGCAGGGGTATTCTGAGAA[CG]GCCCCTGCTCACACGGGTTTAAAAGGAACTCAGTGACCACAGACGGATGAGAACAGCGGA	13	112703561	F	MCF2L;MCF2L	1.94375	0.0269643	0.35028	0.934297	0.93441	1202	MCF2L	MCF.2 cell line derived transforming sequence like	23263	chr13:113752633:113752682:+
71	cg03703325	TCCGCAGGGGTCTCCTGGGAGGAACCCACCAGCGATAGGAACACTGAAGCTGGGCTACGG[CG]TCCGCCCGAGCCTTTTCTTAAAGGCGCCGACCCCGGAAGCGGGGCGTCCGAGGGAGCGCG	3	50581868	R	HEMK1	2.0576	0.0237283	0.411123	0.822128	0.822205	1202	HEMK1	HemK methyltransferase family member 1	51409	chr3:50622014:50622063:+
72	cg03724882	ACCTGCGCCCACAGGGCCTGGGGAAACCTTGAGTACGAATGCCACGCCGCGGCTTGTGGG[CG]ACACCACCGCTGTCACCATGCCCCAGGGCCACCTGGCAATGCTGCTCTTTTCCCGTGACG	14	53933994	F	CDKN3;CDKN3	6.08059	-0.0710461	0.0137507	-2.46526	2.46734	1202	CDKN3	cyclin dependent kinase inhibitor 3	1033	chr14:54878332:54878381:+
73	cg03819692	AAATTGATCAATACGAATGATCACGCCCCATGTGCATCTCCTCAGCAGCCACAAGAGAGA[CG]AGGTCACTGGAGGATAAACATCCGTGACTGCACCTCATGATCCATCACGCACGACGGCCG	16	87753140	F	C16orf81	4.1452	-0.0201646	0.484898	-0.698616	0.698664	1202	C16orf81	long intergenic non-protein coding RNA 304	NA	chr16:89229677:89229726:+
73	cg03819692	AAATTGATCAATACGAATGATCACGCCCCATGTGCATCTCCTCAGCAGCCACAAGAGAGA[CG]AGGTCACTGGAGGATAAACATCCGTGACTGCACCTCATGATCCATCACGCACGACGGCCG	16	87753140	F	C16orf81	4.1452	-0.072686	0.0117112	-2.52237	2.5246	1202	C16orf81	long intergenic non-protein coding RNA 304	NA	chr16:89229773:89229822:+
74	cg03929796	TCTTCCTCCATGTCCAAGACACCCAGCTTAACAACCCTGTAGCCCCCAACTTGGCCCTAG[CG]GCACCTCGCCTCGACCTTGCCATTTTATACTCAATTGGGGCGTAGGGTTCTGAAGCCCAG	3	52206880	F	ALAS1;ALAS1	-19.4101	-0.0492409	0.0879271	-1.70714	1.70783	1202	ALAS1	5'-aminolevulinate synthase 1	211	chr3:52246381:52246430:+
74	cg03929796	TCTTCCTCCATGTCCAAGACACCCAGCTTAACAACCCTGTAGCCCCCAACTTGGCCCTAG[CG]GCACCTCGCCTCGACCTTGCCATTTTATACTCAATTGGGGCGTAGGGTTCTGAAGCCCAG	3	52206880	F	ALAS1;ALAS1	-19.4101	0.0197522	0.493874	0.684326	0.68437	1202	ALAS1	5'-aminolevulinate synthase 1	211	chr3:52248144:52248193:+
74	cg03929796	TCTTCCTCCATGTCCAAGACACCCAGCTTAACAACCCTGTAGCCCCCAACTTGGCCCTAG[CG]GCACCTCGCCTCGACCTTGCCATTTTATACTCAATTGGGGCGTAGGGTTCTGAAGCCCAG	3	52206880	F	ALAS1;ALAS1	-19.4101	0.0123794	0.668096	0.428857	0.428868	1202	ALAS1	5'-aminolevulinate synthase 1	211	chr3:52232763:52232812:+
75	cg03977782	CATCTCCACTTCTCCAGTCCGCCCTACTCTCCACCCGTGACCTCCAGTGGAGACCCCAGG[CG]GCAGCATCAGTATTTGATCGGCCCTTCGTCAGCACGCTGCCAGCCCTGGCCGGCTGGGTT	3	114734370	F	SIDT1;SIDT1	19.4523	-0.0483026	0.0941543	-1.67455	1.67521	1202	SIDT1	SID1 transmembrane family member 1	54847	chr3:113347803:113347852:+
76	cg03991512	AGTTGCCACAGGGTAAGCCCAGTGCCCTTTTGCCCAAGGTCAGGTCACTTGGTGCTGGGG[CG]TCACAGAGCCCAGGAAACTTGGGATCAGAACCCCCTGCTCCCCGCTCCCCACCTCATCCC	16	73707957	R	LDHD;LDHD	-7.60434	-0.111996	9.97941e-05	-3.896	3.90422	1202	LDHD	lactate dehydrogenase D	197257	chr16:75148070:75148119:-
76	cg03991512	AGTTGCCACAGGGTAAGCCCAGTGCCCTTTTGCCCAAGGTCAGGTCACTTGGTGCTGGGG[CG]TCACAGAGCCCAGGAAACTTGGGATCAGAACCCCCTGCTCCCCGCTCCCCACCTCATCCC	16	73707957	R	LDHD;LDHD	-7.60434	-0.523117	2.13709e-85	-20.1133	21.2626	1202	LDHD	lactate dehydrogenase D	197257	chr16:75145929:75145978:-
77	cg04007936	CTGACCCTCACGCAGTGTCCGCCTCCAGGGAACTGTGGAACACGTCGCAGAGAGCTCAAG[CG]CCACGTTTGGATCCCTGAGCAGCTGTCACAAGCCTGCACCCAGGACTGGGGGGCCTGCTG	16	8861518	F	CARHSP1;CARHSP1	-8.44109	0.00605257	0.83396	0.20967	0.209671	1202	CARHSP1	calcium regulated heat stable protein 1	23589	chr16:8948805:8948854:-
78	cg04014889	GAGGGAGCAAAGGTCTCCGGTGTGGCAGGCAGGTTTTTCCAGGCAGCTGGCAGGTGTGCT[CG]CGCAGCTGACACTGCCTTGGGAGCACAGAAGGTGGCAGCAAAGATCATGCGGTCTTTTGA	15	21441686	R	MAGEL2	-7.92458	0.0387193	0.179758	1.34195	1.34228	1202	MAGEL2	MAGE family member L2	54551	chr15:23889047:23889096:-
79	cg04084157	AGGGTGCCTGCCTCTCCCGGCCTGCGCCTGCGCGCTGGGGCCTTCGGCTGAAGGGGTGTG[CG]CTAGCGGAGCTCCGGGAAATGAATGAATGAATGAATGAATGAAATGCTGAAGCGGGCAGG	7	100595769	F	VGF	31.6217	0.0416964	0.148533	1.44524	1.44566	1202	VGF	VGF nerve growth factor inducible	7425	chr7:100805905:100805954:-
80	cg04087608	TAAGGCATCTGCTGAGTGTATAACCATTTTACCTCTTGTTTTTAGCCCTCTTCTGGGTCA[CG]CTAGAATCAGATCTGCTCTCCAGCATCTTCTGTTTCCTGGCAAGTGTTTCCTGCTACTTT	1	119759492	R	HSD3B2;HSD3B2	2.38306	0.0153159	0.595779	0.530601	0.530622	1202	HSD3B2	hydroxy-delta-5-steroid dehydrogenase, 3 beta- and steroid delta-isomerase 2	3284	chr1:119965284:119965333:+
81	cg04169469	GACGCCGGCCCGAGGTGGCGCCGGAGCTGCTGGCAGAGGGGCGGCGGGCGGCGGCGGCGG[CG]GCTACAGGAGGGACTGACAAAGCCCCACGGCACGCCGCTCCCTACTTATAGCACCGGCGG	2	10505885	F	ODC1;ODC1;SNORA80B	4.92692	-0.00046687	0.987099	-0.0161729	0.0161729	1202	ODC1	NA	4953	chr2:10590706:10590755:+
81	cg04169469	GACGCCGGCCCGAGGTGGCGCCGGAGCTGCTGGCAGAGGGGCGGCGGGCGGCGGCGGCGG[CG]GCTACAGGAGGGACTGACAAAGCCCCACGGCACGCCGCTCCCTACTTATAGCACCGGCGG	2	10505885	F	ODC1;ODC1;SNORA80B	4.92692	-0.0331539	0.250737	-1.14891	1.14912	1202	ODC1	ornithine decarboxylase 1	4953	chr2:10580875:10580924:-
82	cg04333463	CCCCGGTCCGCCTGGCCCCTCGCCCGCCCGCCAGGCCCGCCGAATGCGGCCTCCGCCCCG[CG]CGCCTAAAGGAGGAGCGTCGCGGGGGATGGAGGCGGCGCGCGGTGGGACCTGGGGAGATG	8	62789241	F	ASPH;ASPH;ASPH;ASPH;ASPH	0.164994	0.0248149	0.390029	0.859788	0.859877	1202	ASPH	aspartate beta-hydroxylase	444	chr8:62596695:62596744:-
82	cg04333463	CCCCGGTCCGCCTGGCCCCTCGCCCGCCCGCCAGGCCCGCCGAATGCGGCCTCCGCCCCG[CG]CGCCTAAAGGAGGAGCGTCGCGGGGGATGGAGGCGGCGCGCGGTGGGACCTGGGGAGATG	8	62789241	F	ASPH;ASPH;ASPH;ASPH;ASPH	0.164994	-0.0510015	0.07714	-1.76828	1.76905	1202	ASPH	aspartate beta-hydroxylase	444	chr8:62593540:62593589:-
82	cg04333463	CCCCGGTCCGCCTGGCCCCTCGCCCGCCCGCCAGGCCCGCCGAATGCGGCCTCCGCCCCG[CG]CGCCTAAAGGAGGAGCGTCGCGGGGGATGGAGGCGGCGCGCGGTGGGACCTGGGGAGATG	8	62789241	F	ASPH;ASPH;ASPH;ASPH;ASPH	0.164994	-0.0385367	0.181821	-1.33561	1.33594	1202	ASPH	aspartate beta-hydroxylase	444	chr8:62415913:62415962:-
83	cg04359302	CGAACTCCTCACCTCAAATGATCCGCCCACCTCAGCCTCCCAAAGTGCTGGGATTATAGG[CG]TAAGCCACTGCACCTGACCAATACAGTCTTAATAGGGCTATTTGGACCTCCTTGGAGACA	3	180806553	F	MRPL47;MRPL47;NDUFB5	0.25579	0.00716667	0.80397	0.248265	0.248267	1202	MRPL47	mitochondrial ribosomal protein L47	57129	chr3:179320521:179320570:-
83	cg04359302	CGAACTCCTCACCTCAAATGATCCGCCCACCTCAGCCTCCCAAAGTGCTGGGATTATAGG[CG]TAAGCCACTGCACCTGACCAATACAGTCTTAATAGGGCTATTTGGACCTCCTTGGAGACA	3	180806553	F	MRPL47;MRPL47;NDUFB5	0.25579	-0.0152922	0.596348	-0.52978	0.529801	1202	MRPL47	mitochondrial ribosomal protein L47	57129	chr3:179306359:179306408:-
83	cg04359302	CGAACTCCTCACCTCAAATGATCCGCCCACCTCAGCCTCCCAAAGTGCTGGGATTATAGG[CG]TAAGCCACTGCACCTGACCAATACAGTCTTAATAGGGCTATTTGGACCTCCTTGGAGACA	3	180806553	F	MRPL47;MRPL47;NDUFB5	0.25579	0.00971381	0.736543	0.336507	0.336512	1202	NDUFB5	NADH:ubiquinone oxidoreductase subunit B5	4711	chr3:179341948:179341997:+
84	cg04416752	GAGACCTCCTGCCAACCCAATTCCCAGTGCGCAGATGGGGAGGAAGAGGCAGCGAGGAGG[CG]CCCCCAGCTCAAGGTCACCCATCAGGTCTGGGGCAGAGAGAGCCAGAAGCCCGGAATTCC	9	129718848	F	ST6GALNAC4;ST6GALNAC4	-5.33826	-0.0321818	0.264907	-1.1152	1.11539	1202	ST6GALNAC4	ST6 N-acetylgalactosaminide alpha-2,6-sialyltransferase 4	27090	chr9:130670340:130670389:-
84	cg04416752	GAGACCTCCTGCCAACCCAATTCCCAGTGCGCAGATGGGGAGGAAGAGGCAGCGAGGAGG[CG]CCCCCAGCTCAAGGTCACCCATCAGGTCTGGGGCAGAGAGAGCCAGAAGCCCGGAATTCC	9	129718848	F	ST6GALNAC4;ST6GALNAC4	-5.33826	0.0434438	0.132238	1.50589	1.50636	1202	ST6GALNAC4	ST6 N-acetylgalactosaminide alpha-2,6-sialyltransferase 4	27090	chr9:130678690:130678739:-
84	cg04416752	GAGACCTCCTGCCAACCCAATTCCCAGTGCGCAGATGGGGAGGAAGAGGCAGCGAGGAGG[CG]CCCCCAGCTCAAGGTCACCCATCAGGTCTGGGGCAGAGAGAGCCAGAAGCCCGGAATTCC	9	129718848	F	ST6GALNAC4;ST6GALNAC4	-5.33826	0.0349673	0.225734	1.2118	1.21205	1202	ST6GALNAC4	ST6 N-acetylgalactosaminide alpha-2,6-sialyltransferase 4	27090	chr9:130670389:130670438:-
85	cg04424621	CACCCTACTGCATGTTGCAAAGTATTCCTTTAAAATGAAGTGAGTAAAATACTGGGATGA[CG]TTATCTGGAGCCCAAGAAAGATGGCTCATTTGGAAAGGCCTAATATCCCAAGTTGCTTAC	6	27209920	F	HIST1H2BJ	-14.4478	-0.0417917	0.147607	-1.44855	1.44897	1202	HIST1H2BJ	histone cluster 1 H2B family member j	8970	chr6:27100499:27100548:-
86	cg04480914	GGCCGGGTGGGGGGAGGTGACTTGATGTCATCCTGAGCAGCTGGGCGGCGGGTGCCGGTG[CG]CACGGAGCCGAGCCGGGGCTCCCGTTGCGCTGCACCGCGTTGGGTCGGAGTCCCAGGACT	11	64448774	R	PPP2R5B;PPP2R5B	-4.21563	0.000124834	0.99655	0.00432438	0.00432438	1202	PPP2R5B	protein phosphatase 2 regulatory subunit B'beta	5526	chr11:64701704:64701753:+
122	cg06533629	TGTCTTTCGGTTCATAATTGCGATTGTTAGCGAAGTGGTCTCGAATTCCATTTCACTCCC[CG]TTCGCCGCTCTCAGACTAAATTGCAAATATCCCCAAGTCTGTAGCAAAAAAAGTTTTCTC	7	130069910	R	KLF14	16.0562	0.0327475	0.256595	1.13481	1.13502	1202	KLF14	Kruppel like factor 14	136259	chr7:130417617:130417666:-
106	cg05473871	GGTCCTGCCCCTCACCCCTCTCGCGGGGGGTCGACCTGCTCGTGGATGGGGACCCTGGCG[CG]CCTGGGCTCCCATCCGGGGGTTCCCCGACCCAGGTCCCGGTCACCCCCAGCGCAGGGCCC	19	1464513	F	ADAMTSL5	-5.15605	-0.0587899	0.041562	-2.03889	2.04007	1202	ADAMTSL5	ADAMTS like 5	339366	chr19:1505458:1505507:-
89	cg04616566	TCAGCTCGTGGGCTGCCAGCGTGCAACCTCTCACCTAGATAATGGTATATAATATAAATA[CG]TTTCCCTTCCCCCCTTTTTTCTCTTCCTCCTCTTTCTCCTTTCCCTCCCATTTTCCACAT	15	69807614	R	THSD4	0.0685317	-0.00899048	0.755511	-0.311448	0.311452	1202	THSD4	thrombospondin type 1 domain containing 4	79875	chr15:72070594:72070643:+
90	cg04718414	GGTGGGTGGTCCGGCCCCGAGCCCTCCTGACTCTCTCGCCAATGCCCAGAGGCGCCGCAG[CG]ATTCCAGGGAGGCCGCGCTCTCGCCCCAAGGCAACCAGAAGCCCACGTGCCAGGAGAGGC	13	114018313	F	CDC16;CDC16	-5.45261	-0.365932	2.165e-39	-13.2924	13.621	1202	CDC16	cell division cycle 16	8881	chr13:115038036:115038085:+
90	cg04718414	GGTGGGTGGTCCGGCCCCGAGCCCTCCTGACTCTCTCGCCAATGCCCAGAGGCGCCGCAG[CG]ATTCCAGGGAGGCCGCGCTCTCGCCCCAAGGCAACCAGAAGCCCACGTGCCAGGAGAGGC	13	114018313	F	CDC16;CDC16	-5.45261	-0.312491	1.22739e-28	-11.1996	11.3957	1202	CDC16	cell division cycle 16	8881	chr13:115037943:115037956:+,chr13:115038039:115038074:+
90	cg04718414	GGTGGGTGGTCCGGCCCCGAGCCCTCCTGACTCTCTCGCCAATGCCCAGAGGCGCCGCAG[CG]ATTCCAGGGAGGCCGCGCTCTCGCCCCAAGGCAACCAGAAGCCCACGTGCCAGGAGAGGC	13	114018313	F	CDC16;CDC16	-5.45261	-0.347844	1.63276e-35	-12.5743	12.8523	1202	CDC16	cell division cycle 16	8881	chr13:115037975:115038024:+
91	cg04736140	GTTCTCATCCCATATGCCTTTGTCCAAAGGTTGCACGGGGGTTAAGCTTGGCCCAGAAGG[CG]CCGAGGGCTGGTCGAGTTCTCCCCTTTCCAAGAACCAGCCGAATCTCCCTCCCGCAGATC	1	166371941	R	GPR161	-16.1177	0.012821	0.657002	0.444155	0.444167	1202	GPR161	NA	23432	chr1:168059730:168059779:-
91	cg04736140	GTTCTCATCCCATATGCCTTTGTCCAAAGGTTGCACGGGGGTTAAGCTTGGCCCAGAAGG[CG]CCGAGGGCTGGTCGAGTTCTCCCCTTTCCAAGAACCAGCCGAATCTCCCTCCCGCAGATC	1	166371941	R	GPR161	-16.1177	0.000261431	0.992776	0.00905624	0.00905624	1202	GPR161	G protein-coupled receptor 161	23432	chr1:168065760:168065809:-
91	cg04736140	GTTCTCATCCCATATGCCTTTGTCCAAAGGTTGCACGGGGGTTAAGCTTGGCCCAGAAGG[CG]CCGAGGGCTGGTCGAGTTCTCCCCTTTCCAAGAACCAGCCGAATCTCCCTCCCGCAGATC	1	166371941	R	GPR161	-16.1177	0.00551667	0.848475	0.191105	0.191106	1202	GPR161	G protein-coupled receptor 161	23432	chr1:168054189:168054238:-
92	cg04755031	TGATCGGGACGAGGAAGGGTCACTCCGTGACCCGGGATAGGGCCGGGATGCAGCCTTGGA[CG]GGGCTGGGCCCAAATGTGGGCTCTGGAGGGAGCCGGGCTGGGGCTGGTGCTGGTGCTCCC	22	42619174	R	PNPLA5;PNPLA5	3.81719	0.0266793	0.355397	0.924418	0.924528	1202	PNPLA5	patatin like phospholipase domain containing 5	150379	chr22:44275976:44276025:-
93	cg04818845	CAGCGGGAGATCAAGTGAGCCTCAAAACATTAGAAAAACCCAAGCCAGTCTGCAGAGCAC[CG]CAGCCGCCTCAGGGCCGGTTACCATAGCTACCCTTGGCTTCCCAGCCCAGCACATGTCTG	1	6502754	R	PLEKHG5	0.530064	0.0209234	0.468613	0.724915	0.724968	1202	PLEKHG5	pleckstrin homology and RhoGEF domain containing G5	57449	chr1:6550510:6550559:-
93	cg04818845	CAGCGGGAGATCAAGTGAGCCTCAAAACATTAGAAAAACCCAAGCCAGTCTGCAGAGCAC[CG]CAGCCGCCTCAGGGCCGGTTACCATAGCTACCCTTGGCTTCCCAGCCCAGCACATGTCTG	1	6502754	R	PLEKHG5	0.530064	0.0231628	0.422366	0.802527	0.802598	1202	PLEKHG5	pleckstrin homology and RhoGEF domain containing G5	57449	chr1:6526453:6526502:-
93	cg04818845	CAGCGGGAGATCAAGTGAGCCTCAAAACATTAGAAAAACCCAAGCCAGTCTGCAGAGCAC[CG]CAGCCGCCTCAGGGCCGGTTACCATAGCTACCCTTGGCTTCCCAGCCCAGCACATGTCTG	1	6502754	R	PLEKHG5	0.530064	-0.00659281	0.819384	-0.228385	0.228387	1202	PLEKHG5	pleckstrin homology and RhoGEF domain containing G5	57449	chr1:6551711:6551760:-
93	cg04818845	CAGCGGGAGATCAAGTGAGCCTCAAAACATTAGAAAAACCCAAGCCAGTCTGCAGAGCAC[CG]CAGCCGCCTCAGGGCCGGTTACCATAGCTACCCTTGGCTTCCCAGCCCAGCACATGTCTG	1	6502754	R	PLEKHG5	0.530064	0.00128119	0.964608	0.0443816	0.0443816	1202	PLEKHG5	pleckstrin homology and RhoGEF domain containing G5	57449	chr1:6579613:6579662:-
93	cg04818845	CAGCGGGAGATCAAGTGAGCCTCAAAACATTAGAAAAACCCAAGCCAGTCTGCAGAGCAC[CG]CAGCCGCCTCAGGGCCGGTTACCATAGCTACCCTTGGCTTCCCAGCCCAGCACATGTCTG	1	6502754	R	PLEKHG5	0.530064	0.0719658	0.0125714	2.49728	2.49945	1202	PLEKHG5	pleckstrin homology and RhoGEF domain containing G5	57449	chr1:6526982:6527031:-
94	cg04836038	CTCTGCGGGGACAGAGGTCTCAGGAAAGTAGCCTTTATTTATGTGGCACCGATCGGAACC[CG]CGGCCGGCCAGGCGGACCTGGACGGAGCGTCCCTGCTCGGAACCTGGCGCGGGGCGCCGC	13	98537383	R	DOCK9;DOCK9	10.6546	-0.0748966	0.00938769	-2.59936	2.6018	1202	DOCK9	dedicator of cytokinesis 9	23348	chr13:99446898:99446947:-
95	cg05087948	AGGGTAGGGAGAGCGGGAGGCTGCTGGCCTGAGGCTAAAGCTAGTCACTGACCTCTATCA[CG]TGCTTGTTATATGTTAGGCATGATATGCCAGCTCCTTTTATTCGGCGTAGCAATCTCTGA	11	66092773	R	CTSF	-6.99123	-0.0192363	0.505228	-0.666446	0.666487	1202	CTSF	cathepsin F	8722	chr11:66331199:66331248:-
96	cg05089968	TCCACAAAGTACTTTCCATCAGATACACTTTTCTGATGGAAACCAGGTGTGTGATGGTTA[CG]GCCCCAGGTTAGCTCCAGAGCACATTCAACTGTGGGTAAACACAAATGTGCCCTGTGCCA	6	166642763	F	PRR18	-3.91161	0.0295653	0.305749	1.02447	1.02462	1202	PRR18	proline rich 18	285800	chr6:166719426:166719475:-
97	cg05125838	TTAATGCCCCCCAGAATCAGCACCATGTCATCACAGGCTTGGGTCAAGGGGCGGGTCAGA[CG]CCAGTCACATCCGCTCACTGCCCACAGCCACCCCCCCACAGTGAGTCATCTGCCAGGGTG	3	48576589	R	UCN2;COL7A1	-4.60256	-0.0378526	0.189706	-1.31188	1.31219	1202	COL7A1	collagen type VII alpha 1 chain	1294	chr3:48601677:48601726:-
97	cg05125838	TTAATGCCCCCCAGAATCAGCACCATGTCATCACAGGCTTGGGTCAAGGGGCGGGTCAGA[CG]CCAGTCACATCCGCTCACTGCCCACAGCCACCCCCCCACAGTGAGTCATCTGCCAGGGTG	3	48576589	R	UCN2;COL7A1	-4.60256	-0.0154695	0.592097	-0.535922	0.535943	1202	UCN2	urocortin 2	90226	chr3:48599301:48599350:-
98	cg05228408	GGTGTCCTGCCTGGGGTATCCCCAGAGTTTGGCACACGGTGATAGCCAACATTCACTGAG[CG]CCAAAGGGCCAGGTGCTGCCACTCTCTCAAAATAAGCCTCTGCCACTTACTGAACAACTA	1	11787939	R	CLCN6;CLCN6;MTHFR;CLCN6;CLCN6	-4.4943	-0.0397278	0.168677	-1.37694	1.3773	1202	CLCN6	chloride voltage-gated channel 6	1185	chr1:11900203:11900252:+
98	cg05228408	GGTGTCCTGCCTGGGGTATCCCCAGAGTTTGGCACACGGTGATAGCCAACATTCACTGAG[CG]CCAAAGGGCCAGGTGCTGCCACTCTCTCAAAATAAGCCTCTGCCACTTACTGAACAACTA	1	11787939	R	CLCN6;CLCN6;MTHFR;CLCN6;CLCN6	-4.4943	-0.0580229	0.0442991	-2.01223	2.01337	1202	CLCN6	chloride voltage-gated channel 6	1185	chr1:11902928:11902977:+
98	cg05228408	GGTGTCCTGCCTGGGGTATCCCCAGAGTTTGGCACACGGTGATAGCCAACATTCACTGAG[CG]CCAAAGGGCCAGGTGCTGCCACTCTCTCAAAATAAGCCTCTGCCACTTACTGAACAACTA	1	11787939	R	CLCN6;CLCN6;MTHFR;CLCN6;CLCN6	-4.4943	-0.00865339	0.764402	-0.29977	0.299773	1202	CLCN6	chloride voltage-gated channel 6	1185	chr1:11902765:11902814:+
98	cg05228408	GGTGTCCTGCCTGGGGTATCCCCAGAGTTTGGCACACGGTGATAGCCAACATTCACTGAG[CG]CCAAAGGGCCAGGTGCTGCCACTCTCTCAAAATAAGCCTCTGCCACTTACTGAACAACTA	1	11787939	R	CLCN6;CLCN6;MTHFR;CLCN6;CLCN6	-4.4943	-0.0289712	0.315574	-1.00387	1.00401	1202	MTHFR	methylenetetrahydrofolate reductase	4524	chr1:11846998:11847047:-
99	cg05270634	CTGCAAGATCGTGGTGGTGGGAGACGCAGAGTGCGGCAAGACGGCGCTGCTGCAGGTGTT[CG]CCAAGGACGCCTATCCCGGGGTGAGGGACCTGCGTCTTGGGAGGGGGACGCTAAGGCTGC	17	38430971	R	RND2	9.45868	0.027776	0.335962	0.962437	0.962561	1202	RND2	Rho family GTPase 2	8153	chr17:41181173:41181222:+
100	cg05294243	GATGTCTCCAGGCACCCCCGACCTGGGCTTGGCCCTCTGCTTGGGGCGGAGCTTCCAGGA[CG]TGCTGGGACCTAGGTCTGACCCCGCCCAAGGCAGAGTTGAACCCACTGTGAACTTTCAGG	19	56260918	F	KLK13	10.4337	0.0279206	0.333451	0.96745	0.967575	1202	KLK13	kallikrein related peptidase 13	26085	chr19:51559553:51559602:-
101	cg05316065	CTGAGCAAGTCTTTGATTCATGGATTCCCAGCAACTCTAGCTGGAACAACTTCTTTGGCT[CG]TATTCCTCTGGTATATGTGCTGAATTTAGAATTCAATCACTGGACACCAGGAAAGGCAAC	8	130868189	R	GSDMC;GSDMC	-14.2287	0.0133471	0.643879	0.462385	0.462399	1202	GSDMC	gasdermin C	56169	chr8:130760676:130760725:-
102	cg05422352	CTTAGTTAACTCACCTGAAAAATGGGAACAATAATACAAGCCACAGTTATGAGAATTCAA[CG]AGATAATGCATGTACAGCACCTGGCACATGGTAAAACGCTCAATAAGTGGTAGTTAGTAG	2	232358991	F	COPS7B	0.965636	-0.0125672	0.663369	-0.435363	0.435374	1202	COPS7B	COP9 signalosome subunit 7B	64708	chr2:232673225:232673274:+
103	cg05440289	GAGTCTGGTAAGTGTCGGATGGTAGAACCAGGGTTGGGACTCGGGACCTCCAACAGCATA[CG]ATGTGGTGGGGGTGGGCAGCCTGGGTGGGGGTGGGCATTACTCTGGGGCTGGATTCAGCT	1	151147743	R	IVL	1.54719	-0.0375313	0.193495	-1.30073	1.30104	1202	IVL	involucrin	3713	chr1:152884166:152884215:+
104	cg05441133	CTCTCACCCGCTGCCGGGCTGGATTGTCCTCCACTTGTGCTTATCTGGTCCTCGATGCCG[CG]CTCCGACGTCTTATCTGAGGGAGCCTTCCGTTAATGAAGGCTCTATAAACATCTGACAAA	10	48036897	F	GDF2	3.10376	-0.00142808	0.960553	-0.0494701	0.0494701	1202	GDF2	growth differentiation factor 2	2658	chr10:48413199:48413248:-
105	cg05442902	GCCAGGTCACCCTCTCACTCTGTGCCTCTTAGTTATCTTGCATGCTCTGGTCTTTGCATA[CG]CTGCTCCCTGCACCAGGAACCTCCATCCCCATCTTTGTCTGCTTGTCGAACTTCAGAAAT	22	19699010	R	MGC16703;P2RX6;P2RX6	-3.9661	0.0152258	0.597944	0.527479	0.527499	1202	MGC16703	tubulin alpha 3f pseudogene	113691	chr22:21362954:21363003:-
105	cg05442902	GCCAGGTCACCCTCTCACTCTGTGCCTCTTAGTTATCTTGCATGCTCTGGTCTTTGCATA[CG]CTGCTCCCTGCACCAGGAACCTCCATCCCCATCTTTGTCTGCTTGTCGAACTTCAGAAAT	22	19699010	R	MGC16703;P2RX6;P2RX6	-3.9661	0.0914814	0.00149833	3.17789	3.18235	1202	MGC16703	tubulin alpha 3f pseudogene	113691	chr22:21362609:21362658:-
105	cg05442902	GCCAGGTCACCCTCTCACTCTGTGCCTCTTAGTTATCTTGCATGCTCTGGTCTTTGCATA[CG]CTGCTCCCTGCACCAGGAACCTCCATCCCCATCTTTGTCTGCTTGTCGAACTTCAGAAAT	22	19699010	R	MGC16703;P2RX6;P2RX6	-3.9661	-0.0223511	0.438813	-0.774393	0.774458	1202	P2RX6	purinergic receptor P2X 6	9127	chr22:21382238:21382287:+
105	cg05442902	GCCAGGTCACCCTCTCACTCTGTGCCTCTTAGTTATCTTGCATGCTCTGGTCTTTGCATA[CG]CTGCTCCCTGCACCAGGAACCTCCATCCCCATCTTTGTCTGCTTGTCGAACTTCAGAAAT	22	19699010	R	MGC16703;P2RX6;P2RX6	-3.9661	0.0336973	0.24305	1.16775	1.16797	1202	P2RX6	NA	9127	chr22:21382797:21382846:+
107	cg05492270	GAGCCGCCGATTGGCTAGGAGCACTTGAGCAGCGGAAGCAGCTGGCTCGCGCGGGGACTG[CG]GTGAGGGGGCGAGCCGTGAAGATGGCGGCAGTGGTGGAGGTGGAGGTTGGAGGTGGTGCT	11	71317733	R	RNF121;LOC100133315;RNF121;RNF121;RNF121	-16.7311	0.0262994	0.362292	0.91125	0.911355	1202	LOC100133315	transient receptor potential cation channel, subfamily C, member 2-like	NA	chr11:71628676:71628725:-
107	cg05492270	GAGCCGCCGATTGGCTAGGAGCACTTGAGCAGCGGAAGCAGCTGGCTCGCGCGGGGACTG[CG]GTGAGGGGGCGAGCCGTGAAGATGGCGGCAGTGGTGGAGGTGGAGGTTGGAGGTGGTGCT	11	71317733	R	RNF121;LOC100133315;RNF121;RNF121;RNF121	-16.7311	0.00516393	0.858057	0.178885	0.178886	1202	LOC100133315	transient receptor potential cation channel, subfamily C, member 2-like	NA	chr11:71627227:71627276:-
107	cg05492270	GAGCCGCCGATTGGCTAGGAGCACTTGAGCAGCGGAAGCAGCTGGCTCGCGCGGGGACTG[CG]GTGAGGGGGCGAGCCGTGAAGATGGCGGCAGTGGTGGAGGTGGAGGTTGGAGGTGGTGCT	11	71317733	R	RNF121;LOC100133315;RNF121;RNF121;RNF121	-16.7311	0.0473093	0.101126	1.64007	1.64068	1202	RNF121	ring finger protein 121	55298	chr11:71708376:71708425:+
107	cg05492270	GAGCCGCCGATTGGCTAGGAGCACTTGAGCAGCGGAAGCAGCTGGCTCGCGCGGGGACTG[CG]GTGAGGGGGCGAGCCGTGAAGATGGCGGCAGTGGTGGAGGTGGAGGTTGGAGGTGGTGCT	11	71317733	R	RNF121;LOC100133315;RNF121;RNF121;RNF121	-16.7311	0.0152515	0.597328	0.528367	0.528388	1202	RNF121	ring finger protein 121	55298	chr11:71708581:71708630:+
108	cg05501584	GCATTACCCCTTGTGGGAGCCATATTTTTCTAGAAGGCATTTTGATCAAGACAGGCCTCC[CG]CGGTTATTGATCTTAGGGTCATTGAGAGTCCAAGAACTGGGGAGATGAAGGCCACCCGGC	15	90737310	R	ST8SIA2	-0.164582	-0.024516	0.395765	-0.849429	0.849514	1202	ST8SIA2	ST8 alpha-N-acetyl-neuraminide alpha-2,8-sialyltransferase 2	8128	chr15:93011696:93011745:+
109	cg05532892	TGGGGGGCGCTGGCTGCCTGCTGGCCCTGGGGTTGGATCACTTCTTTCAAATCAGGGAAG[CG]CCTCTTCATCCTCGACTGTCCAGTGCCGCCGAAGAAAAAGTGCCTGTGATCCGACCCCGG	11	14623012	R	PDE3B;PSMA1	6.72946	-0.0147474	0.6095	-0.510904	0.510922	1202	PDE3B	phosphodiesterase 3B	5140	chr11:14891734:14891783:+
109	cg05532892	TGGGGGGCGCTGGCTGCCTGCTGGCCCTGGGGTTGGATCACTTCTTTCAAATCAGGGAAG[CG]CCTCTTCATCCTCGACTGTCCAGTGCCGCCGAAGAAAAAGTGCCTGTGATCCGACCCCGG	11	14623012	R	PDE3B;PSMA1	6.72946	-0.0350605	0.224498	-1.21503	1.21528	1202	PSMA1	proteasome subunit alpha 1	5682	chr11:14632578:14632627:-
109	cg05532892	TGGGGGGCGCTGGCTGCCTGCTGGCCCTGGGGTTGGATCACTTCTTTCAAATCAGGGAAG[CG]CCTCTTCATCCTCGACTGTCCAGTGCCGCCGAAGAAAAAGTGCCTGTGATCCGACCCCGG	11	14623012	R	PDE3B;PSMA1	6.72946	-0.00421436	0.883953	-0.145991	0.145991	1202	PSMA1	proteasome subunit alpha 1	5682	chr11:14541863:14541912:-
109	cg05532892	TGGGGGGCGCTGGCTGCCTGCTGGCCCTGGGGTTGGATCACTTCTTTCAAATCAGGGAAG[CG]CCTCTTCATCCTCGACTGTCCAGTGCCGCCGAAGAAAAAGTGCCTGTGATCCGACCCCGG	11	14623012	R	PDE3B;PSMA1	6.72946	-0.0186216	0.518932	-0.645145	0.645182	1202	PSMA1	proteasome subunit alpha 1	5682	chr11:14529202:14529225:-,chr11:14526769:14526794:-
111	cg05759269	CCAAGTAAAAAAAGCCAGATTTGTGGCTCACTTCGTGGGGAAATGTGTCCAGCGCACCAA[CG]CAGGCGAGGGACTGGGGGAGGAGGGAAGTGCCCTCCTGCAGCACGCGAGGTTCCGGGACC	6	36754231	R	CDKN1A;CDKN1A	-9.04721	-0.0886085	0.00210574	-3.07756	3.08161	1202	CDKN1A	cyclin dependent kinase inhibitor 1A	1026	chr6:36646665:36646714:+
111	cg05759269	CCAAGTAAAAAAAGCCAGATTTGTGGCTCACTTCGTGGGGAAATGTGTCCAGCGCACCAA[CG]CAGGCGAGGGACTGGGGGAGGAGGGAAGTGCCCTCCTGCAGCACGCGAGGTTCCGGGACC	6	36754231	R	CDKN1A;CDKN1A	-9.04721	-0.0877009	0.00234012	-3.04588	3.0498	1202	CDKN1A	cyclin dependent kinase inhibitor 1A	1026	chr6:36654968:36655017:+
112	cg05851163	CTCCGACCCTGCCGCCCCCATTCTCCGCTCCCCGCTCTGGGGCTGAGTGAGGCAGGATGG[CG]AGAGACCCCTGAGCCACCAAGTCCGCTTACCTCAGGCAGATCCCGACGGGGGCTCGGCGC	18	63334546	F	DSEL	-8.0565	-0.00348637	0.903892	-0.120772	0.120772	1202	DSEL	dermatan sulfate epimerase-like	92126	chr18:65175906:65175955:-
112	cg05851163	CTCCGACCCTGCCGCCCCCATTCTCCGCTCCCCGCTCTGGGGCTGAGTGAGGCAGGATGG[CG]AGAGACCCCTGAGCCACCAAGTCCGCTTACCTCAGGCAGATCCCGACGGGGGCTCGGCGC	18	63334546	F	DSEL	-8.0565	0.0329162	0.254153	1.14066	1.14087	1202	DSEL	dermatan sulfate epimerase-like	92126	chr18:65173902:65173951:-
113	cg05898102	AAAGAGACGGTTTGGGAATTGCTCTGAGGATGCTATGCAAGTCACTAATAAAGGAAGACA[CG]GACAGATGAACTTAAAAGAGAAGCTTTAGCTGCCAAAGATTGGGAAAGGGAAAGGACAAA	5	140552143	F	PCDHB10;PCDHB10	1.20203	0.0319706	0.268058	1.10787	1.10806	1202	PCDHB10	protocadherin beta 10	56126	chr5:140574453:140574502:+
113	cg05898102	AAAGAGACGGTTTGGGAATTGCTCTGAGGATGCTATGCAAGTCACTAATAAAGGAAGACA[CG]GACAGATGAACTTAAAAGAGAAGCTTTAGCTGCCAAAGATTGGGAAAGGGAAAGGACAAA	5	140552143	F	PCDHB10;PCDHB10	1.20203	0.0103772	0.719288	0.359489	0.359496	1202	PCDHB10	protocadherin beta 10	56126	chr5:140574823:140574872:+
114	cg06134964	GAGTTTTCCTCTCACACTTGACCCTGATTTTGTTTTGCAGAAGCGACAGGCTGTGGACAC[CG]TGAGTAAGAGTCCTGGCAAAGGGGTCTGTGACAGAGCCCTTTTTACAGGCTTGCTTTCCC	3	52787073	R	ITIH1;ITIH1	5.64269	0.00623259	0.829097	0.215906	0.215907	1202	ITIH1	inter-alpha-trypsin inhibitor heavy chain 1	3697	chr3:52825832:52825881:+
115	cg06144905	CTGACCTCACCACCCACCAGGGAGGTGGGTCTTATTCTGGGCATCGTGCCAAGTTCTTAG[CG]GGGCCCTCTAGAATCTCTAAAGCAAATCAGGCTGAAGAGGGGAAAACCAGCAGGGGGAGG	17	24393906	F	PIPOX	3.41348	0.0130276	0.651836	0.451313	0.451326	1202	PIPOX	pipecolic acid and sarcosine oxidase	51268	chr17:27383639:27383688:+
116	cg06171242	ACTTTCCAGCTCTTCCGAAGTTCGTTCTTGCGCAAAGCCCAAAGGCTGGAAAACCGTCCA[CG]ATGACCAGCATGACTCAGTCTCTGCGGGAGGTGATAAAGGCCATGACCAAGGCTCGCAAT	6	24775469	F	ACOT13;TTRAP;ACOT13;ACOT13;ACOT13	0.573873	-0.0320051	0.267542	-1.10907	1.10926	1202	ACOT13	acyl-CoA thioesterase 13	55856	chr6:24698164:24698213:+
117	cg06189653	CTGTGGGTTCGGCACTAGGTCCTCCTCCCCGTGGCTTCCTAGTAGGCATGTGGTGGTGTA[CG]CCTGCTGGGCACCTAGCGAGAGGGGTCGTGAGTTGGGAGGGAGCCACGTTGGGGTGCCTG	5	176805938	R	PRR7	-9.92863	-0.0087614	0.76155	-0.303512	0.303516	1202	PRR7	proline rich 7, synaptic	80758	chr5:176883064:176883113:+
118	cg06295856	CCGCAGCCGAGCAGGAAGAGCGAGCCGGGGGATTGAGACTGTCCGATCCAACCTAGGGCA[CG]AGCCTGGTATAAATCGCGGACTAACAGAGACTATCTGATGAAGAGACTAACGGAGAGAGA	11	14950218	F	CALCA;CALCA;CALCA	1.25133	0.0198441	0.491866	0.68751	0.687555	1202	CALCA	calcitonin related polypeptide alpha	796	chr11:14991569:14991618:-
118	cg06295856	CCGCAGCCGAGCAGGAAGAGCGAGCCGGGGGATTGAGACTGTCCGATCCAACCTAGGGCA[CG]AGCCTGGTATAAATCGCGGACTAACAGAGACTATCTGATGAAGAGACTAACGGAGAGAGA	11	14950218	F	CALCA;CALCA;CALCA	1.25133	0.00151684	0.958103	0.0525448	0.0525448	1202	CALCA	calcitonin related polypeptide alpha	796	chr11:14988290:14988339:-
118	cg06295856	CCGCAGCCGAGCAGGAAGAGCGAGCCGGGGGATTGAGACTGTCCGATCCAACCTAGGGCA[CG]AGCCTGGTATAAATCGCGGACTAACAGAGACTATCTGATGAAGAGACTAACGGAGAGAGA	11	14950218	F	CALCA;CALCA;CALCA	1.25133	0.0155992	0.588996	0.540415	0.540436	1202	CALCA	calcitonin related polypeptide alpha	796	chr11:14993791:14993807:-,chr11:14992715:14992747:-
119	cg06327515	GGCTCTTTTGTGGCTAATCTAGCGAGGGACCTAGGGCTGGGGGTGGAGGAGCTGTCTTCA[CG]TGAAGCCCGGGTAGTGTCTGATGATAATAAAAAGTATTTGCACCTTGATTTGCTGACTGG	5	140583445	F	PCDHB14	5.71657	0.00134961	0.962719	0.0467519	0.046752	1202	PCDHB14	protocadherin beta 14	56122	chr5:140605411:140605460:+
120	cg06363129	AAATTGCCTGAAATTTCAGAGTTGGACTTCATCACTTGTCTGTGAGCCGACGCAGGCAGG[CG]TATTCTATATCAACGACAGACTCTCCTCTGCCATTTCCTTTCCTGAATCTAGTTAACATT	7	16472127	R	SOSTDC1	-0.0477947	0.0181897	0.528676	0.630178	0.630212	1202	SOSTDC1	sclerostin domain containing 1	25928	chr7:16501796:16501845:-
121	cg06493994	GGAGAGCAAGTCAAGAAATACGGTGAAGGAGTCCTTCCCAAAGTTGTCTAGGTCCTTCCG[CG]CCGGTGCCTGGTCTTCGTCGTCAACACCATGGACAGCTCCCGGGAACCGACTCTGGGGCG	6	25760581	R	SCGN;SCGN	23.3721	0.0172633	0.549881	0.598078	0.598107	1202	SCGN	secretagogin, EF-hand calcium binding protein	10590	chr6:25701797:25701846:+
123	cg06637774	AGCGCCTGGGCGAGTGACATCTGGGCCGGACCAGCTGGTGCTGCGCGGCGCAGGTAAGGG[CG]TGCGCGGGCAGGGACAGGGGTAAGGGGTGCCGGGGCGCGGGGATACAGGGAGGCCTGCCC	11	72653350	R	P2RY6;P2RY6	1.89342	0.0315374	0.274599	1.09285	1.09303	1202	P2RY6	pyrimidinergic receptor P2Y6	5031	chr11:72981076:72981125:+
123	cg06637774	AGCGCCTGGGCGAGTGACATCTGGGCCGGACCAGCTGGTGCTGCGCGGCGCAGGTAAGGG[CG]TGCGCGGGCAGGGACAGGGGTAAGGGGTGCCGGGGCGCGGGGATACAGGGAGGCCTGCCC	11	72653350	R	P2RY6;P2RY6	1.89342	0.0390264	0.176328	1.3526	1.35295	1202	P2RY6	pyrimidinergic receptor P2Y6	5031	chr11:73008597:73008646:+
123	cg06637774	AGCGCCTGGGCGAGTGACATCTGGGCCGGACCAGCTGGTGCTGCGCGGCGCAGGTAAGGG[CG]TGCGCGGGCAGGGACAGGGGTAAGGGGTGCCGGGGCGCGGGGATACAGGGAGGCCTGCCC	11	72653350	R	P2RY6;P2RY6	1.89342	0.0309865	0.283075	1.07375	1.07392	1202	P2RY6	pyrimidinergic receptor P2Y6	5031	chr11:73009433:73009482:+
124	cg06638451	TTATTCTGGTATCAATAAAAAGGAACTGTTACTATAGTAACAGATATTCCACTTGGTGCA[CG]GCCACTTCCACGATGCGGAACATCATGTCCAAGCCACACGCTTGAGAGGCACAAATAAAT	3	58538309	F	FAM107A;FAM107A;FAM107A;FAM107A	2.47969	0.0287893	0.318624	0.997565	0.997703	1202	FAM107A	family with sequence similarity 107 member A	11170	chr3:58549985:58550034:-
125	cg06690548	GAAGCAATTTGAGGGTGTTCCAGATCACACCAACAGCGGATGCTGCATCTGGGTAGTTCA[CG]TACCCGAACAAAAATTTTAAAAATTTGGTGTGGCCTTTGCCATCCATTCACTCCTCAAAA	4	139382258	R	SLC7A11	-17.3121	-0.000452385	0.987499	-0.0156711	0.0156711	1202	SLC7A11	solute carrier family 7 member 11	23657	chr4:139100417:139100466:-
126	cg06908778	TGAGTCAGAGGCAGGTGCTGCAAGGTAGGGCCGAGGCGGGCAGGTGCCCTAACTAGCTGG[CG]CCGAGGAGACCCGGGTGCGGTGGGCTCCACCGACTCTCTCTCCCGCAGTGTTCGAGCAAT	10	22674608	R	SPAG6;SPAG6	10.8651	0.0382934	0.184598	1.32717	1.32749	1202	SPAG6	sperm associated antigen 6	9576	chr10:22699963:22700012:+
126	cg06908778	TGAGTCAGAGGCAGGTGCTGCAAGGTAGGGCCGAGGCGGGCAGGTGCCCTAACTAGCTGG[CG]CCGAGGAGACCCGGGTGCGGTGGGCTCCACCGACTCTCTCTCCCGCAGTGTTCGAGCAAT	10	22674608	R	SPAG6;SPAG6	10.8651	0.0368236	0.202035	1.27618	1.27647	1202	SPAG6	sperm associated antigen 6	9576	chr10:22706212:22706261:+
127	cg06958034	AACCGGGACGGAGGCTGGCCCTGGGACAGCAGGCGGCTCCGAGAACGGGTCTGAGGTGGC[CG]CGCAGCCCGCGGGCCTGTCGGGCCCAGCCGAGGTCGGGCCGGGGGCGGTGGGGGAGCGCA	1	23218790	R	KDM1A;KDM1A	2.78805	0.0922046	0.00137325	3.20316	3.20773	1202	KDM1A	lysine demethylase 1A	23028	chr1:23410002:23410051:+
128	cg06975499	CTCGCCTGGGTCTCTCTCGCCCCGTCGCCCCCATTCCCCCACCCTCGGAATGAGGAGGGG[CG]CCTGCTACCCCCGGCCAGGCAGGCAGTGTGTCCCTCGGATTCCTTCCAATTTCCTGATCC	17	38150407	F	EZH1	-0.508782	0.0383396	0.184067	1.32878	1.3291	1202	EZH1	enhancer of zeste 1 polycomb repressive complex 2 subunit	2145	chr17:40852373:40852422:-
128	cg06975499	CTCGCCTGGGTCTCTCTCGCCCCGTCGCCCCCATTCCCCCACCCTCGGAATGAGGAGGGG[CG]CCTGCTACCCCCGGCCAGGCAGGCAGTGTGTCCCTCGGATTCCTTCCAATTTCCTGATCC	17	38150407	F	EZH1	-0.508782	-9.33505e-05	0.99742	-0.00323375	0.00323375	1202	EZH1	uncharacterized LOC100131541	100131541	chr17:40855458:40855496:-
129	cg06994793	GTAAGACAGGAAATCAATCAGAGGCAGAGCGACGCCTCTGGCTCTGGTCTAGTGGTGCAG[CG]TCTCTAGCCCTCGCCCCGCCCACCGTCCCCGCGAGGCGTCCACTCGCCGAGCCCCGCCCT	5	139999095	R	TMCO6	2.26458	0.0050653	0.860741	0.175468	0.175469	1202	TMCO6	NA	NA	chr5:139988807:139988855:+
129	cg06994793	GTAAGACAGGAAATCAATCAGAGGCAGAGCGACGCCTCTGGCTCTGGTCTAGTGGTGCAG[CG]TCTCTAGCCCTCGCCCCGCCCACCGTCCCCGCGAGGCGTCCACTCGCCGAGCCCCGCCCT	5	139999095	R	TMCO6	2.26458	0.0211502	0.463805	0.732775	0.73283	1202	TMCO6	transmembrane and coiled-coil domains 6	55374	chr5:140024825:140024874:+
130	cg07038400	GTGGCGCAGGTGCAGGACTGTGGGAAGACAGGAGCGCCAGGGAATGTCTGGCCAGCAGCG[CG]CTGCCCTCAAGGGGCCTCCTTGAAGGCCCCTTGAAGAGGGCAACACAACTAATGACGATA	3	137166853	F	PPP2R3A	1.77874	0.0124996	0.665069	0.433021	0.433033	1202	PPP2R3A	protein phosphatase 2 regulatory subunit B''alpha	5523	chr3:135866170:135866219:+
130	cg07038400	GTGGCGCAGGTGCAGGACTGTGGGAAGACAGGAGCGCCAGGGAATGTCTGGCCAGCAGCG[CG]CTGCCCTCAAGGGGCCTCCTTGAAGGCCCCTTGAAGAGGGCAACACAACTAATGACGATA	3	137166853	F	PPP2R3A	1.77874	-0.0128891	0.655297	-0.446515	0.446528	1202	PPP2R3A	protein phosphatase 2 regulatory subunit B''alpha	5523	chr3:135741971:135742020:+
130	cg07038400	GTGGCGCAGGTGCAGGACTGTGGGAAGACAGGAGCGCCAGGGAATGTCTGGCCAGCAGCG[CG]CTGCCCTCAAGGGGCCTCCTTGAAGGCCCCTTGAAGAGGGCAACACAACTAATGACGATA	3	137166853	F	PPP2R3A	1.77874	0.0168272	0.560008	0.582965	0.582993	1202	PPP2R3A	protein phosphatase 2 regulatory subunit B''alpha	5523	chr3:135721286:135721335:+
130	cg07038400	GTGGCGCAGGTGCAGGACTGTGGGAAGACAGGAGCGCCAGGGAATGTCTGGCCAGCAGCG[CG]CTGCCCTCAAGGGGCCTCCTTGAAGGCCCCTTGAAGAGGGCAACACAACTAATGACGATA	3	137166853	F	PPP2R3A	1.77874	0.0237006	0.41167	0.821168	0.821245	1202	PPP2R3A	protein phosphatase 2 regulatory subunit B''alpha	5523	chr3:135866116:135866165:+
132	cg07180649	TACAGCCTTCCGGGAGCTGGACGGGGCCTCCCCAGCTTTGGGCAGCTTGGGACAGTGGCC[CG]AGACTGTGGGAATCCGAAACCTCGCTTCTGGCTAGCCACAAGGTCTGGGCGCGCCCCAGG	1	22342877	R	WNT4	-4.10597	-0.0104248	0.718055	-0.361138	0.361144	1202	WNT4	Wnt family member 4	54361	chr1:22446480:22446529:-
133	cg07211259	TCCCATTCACAGACAAACTGCTAAAAGCAAAACCAAAACTTTCCAAATAAGCCAGGCTTT[CG]TCAGTTCCTCAGAACTAGTTCTGGTTTGACTCACTCTCATGTTACGGCAAACCTTAAGCT	9	5500497	R	PDCD1LG2	-2.42361	-0.0575221	0.0461672	-1.99483	1.99593	1202	PDCD1LG2	programmed cell death 1 ligand 2	80380	chr9:5563196:5563211:+,chr9:5569954:5569987:+
134	cg07236943	AACGTGCGGTTGCCGTGACTAAACGCATTCATTCACCCTACAAGATTTAGGAAAATGTAA[CG]TTGCAAGGGAAGCAAGGTCTCTGTGTAAACCTCGTAATCGCCACCAAAAGTCGGTAGCTG	7	94122422	F	SGCE;SGCE;PEG10;SGCE;PEG10	4.68448	-0.0216389	0.45354	-0.749712	0.74977	1202	PEG10	paternally expressed 10	23089	chr7:94293913:94293962:+
134	cg07236943	AACGTGCGGTTGCCGTGACTAAACGCATTCATTCACCCTACAAGATTTAGGAAAATGTAA[CG]TTGCAAGGGAAGCAAGGTCTCTGTGTAAACCTCGTAATCGCCACCAAAAGTCGGTAGCTG	7	94122422	F	SGCE;SGCE;PEG10;SGCE;PEG10	4.68448	-0.0247935	0.390437	-0.859048	0.859136	1202	PEG10	paternally expressed 10	23089	chr7:94298242:94298290:+
134	cg07236943	AACGTGCGGTTGCCGTGACTAAACGCATTCATTCACCCTACAAGATTTAGGAAAATGTAA[CG]TTGCAAGGGAAGCAAGGTCTCTGTGTAAACCTCGTAATCGCCACCAAAAGTCGGTAGCTG	7	94122422	F	SGCE;SGCE;PEG10;SGCE;PEG10	4.68448	0.000508619	0.985946	0.0176191	0.0176191	1202	PEG10	paternally expressed 10	23089	chr7:94298638:94298687:+
134	cg07236943	AACGTGCGGTTGCCGTGACTAAACGCATTCATTCACCCTACAAGATTTAGGAAAATGTAA[CG]TTGCAAGGGAAGCAAGGTCTCTGTGTAAACCTCGTAATCGCCACCAAAAGTCGGTAGCTG	7	94122422	F	SGCE;SGCE;PEG10;SGCE;PEG10	4.68448	-0.00254436	0.929781	-0.0881393	0.0881394	1202	SGCE	sarcoglycan epsilon	8910	chr7:94228156:94228205:-
135	cg07265300	CACATTTCCCGCACAAGTCCCCAAGCCTTGGACCCCCCTCATCAGGACCTCCGGCACAGG[CG]CCCGTTTCCCGCCACTGCCTTCCAGTGGTTTGGTCCCCGAGCAGGACCCAAGGCGGGGCA	2	24199504	F	PFN4;PFN4;LOC375190	28.398	0.0553356	0.0551173	1.91884	1.91982	1202	PFN4	profilin family member 4	375189	chr2:24342455:24342504:-
136	cg07484827	GCCCCTCCCTCTCTGCCCTTTCATTAGCTTAATTACACCGTGCCTATGACAACAGAGCAA[CG]GAAACTGATACCTCGGGCCTCTGGGGCTTGAATTATTCAAACTCTGTAAAGCAGCACACA	11	3649733	F	CHRNA10	6.5815	-0.0333234	0.248321	-1.15479	1.155	1202	CHRNA10	cholinergic receptor nicotinic alpha 10 subunit	57053	chr11:3687028:3687077:-
137	cg07494518	CGTGGGGCTGGCGGCGCGGATGCCCTGGGGCGCTGCAGACCCCGAGAGGCCGCTTGCCCG[CG]GGGACGTCAGCCGCTTTTGCTGTTAAAATCTGAAATGTTCAGCAAGTTAGAAACTTGAAA	21	43672036	F	SIK1	-5.79414	-0.0537067	0.0626862	-1.86225	1.86314	1202	SIK1	salt inducible kinase 1	150094	chr21:44834827:44834876:-
137	cg07494518	CGTGGGGCTGGCGGCGCGGATGCCCTGGGGCGCTGCAGACCCCGAGAGGCCGCTTGCCCG[CG]GGGACGTCAGCCGCTTTTGCTGTTAAAATCTGAAATGTTCAGCAAGTTAGAAACTTGAAA	21	43672036	F	SIK1	-5.79414	-0.00809845	0.779106	-0.280545	0.280548	1202	SIK1	salt inducible kinase 1	150094	chr21:44834947:44834996:-
138	cg07654934	CCGGATGAGCAGTGACTTCAGGGCTTGGGCTACTCTGGCTTAACGGGACCAGTAGCAGAG[CG]CCGCCCGTCCTGCTTGCTGCTGGGTCCGGTTGCCGAGGCGGAAAAGTCGCAAGCTCCTTC	3	159873023	R	LXN;LXN;GFM1	-7.18344	-0.0124939	0.665213	-0.432823	0.432834	1202	GFM1	G elongation factor mitochondrial 1	85476	chr3:158410222:158410271:+
138	cg07654934	CCGGATGAGCAGTGACTTCAGGGCTTGGGCTACTCTGGCTTAACGGGACCAGTAGCAGAG[CG]CCGCCCGTCCTGCTTGCTGCTGGGTCCGGTTGCCGAGGCGGAAAAGTCGCAAGCTCCTTC	3	159873023	R	LXN;LXN;GFM1	-7.18344	0.0155701	0.589691	0.539407	0.539428	1202	LXN	latexin	56925	chr3:158384484:158384533:-
139	cg07817698	TCGGTCAGGCGTGTGCAGACAGCGCCTGCAGGTCTGGGTGGGTGCTGATCTGAGTGTCTG[CG]CCTGGGCCATGTTTTTGAGCCTGGCACAGGGGTGCTTAGTGAACACATGACCGCCTAGCG	16	70600426	R	DHODH	12.909	-0.0376265	0.192367	-1.30403	1.30434	1202	DHODH	dihydroorotate dehydrogenase (quinone)	1723	chr16:72058439:72058488:+
139	cg07817698	TCGGTCAGGCGTGTGCAGACAGCGCCTGCAGGTCTGGGTGGGTGCTGATCTGAGTGTCTG[CG]CCTGGGCCATGTTTTTGAGCCTGGCACAGGGGTGCTTAGTGAACACATGACCGCCTAGCG	16	70600426	R	DHODH	12.909	-0.03859	0.181217	-1.33746	1.33779	1202	DHODH	dihydroorotate dehydrogenase (quinone)	1723	chr16:72056323:72056372:+
140	cg07850604	TAGTTCATCTGCTGGCCGGCTCTCAGTCCCCGTGGCGCCCCCTTTCCTCTTGTCCCAGAG[CG]CTCTCGACTCCACCATGCCAAGGGGATTCCTGGTGAAGCGAACTAAACGGACAGGCGGCT	14	35073194	F	INSM2;INSM2	21.3102	-0.0487763	0.0909677	-1.691	1.69167	1202	INSM2	INSM transcriptional repressor 2	84684	chr14:36006173:36006222:+
141	cg07929310	AGGGAAACCGAGGGCCAGGAAACAACTAGAATCCGACGGTATTTCCTAGCTCCCTGATGG[CG]CTTCCCATGCCCCCAACTAAATCATGAAATAACCCACTCACCTGTTTGCACCGGGCCTGC	16	83618562	R	KIAA0513	-9.26777	-0.00650654	0.821708	-0.225396	0.225398	1202	KIAA0513	KIAA0513	9764	chr16:85127486:85127535:+
142	cg08035942	CCTTTAATCTTTTTGTTTTGGTTTGAATCTGCTCGGCGCAGACTGGCCAAGGATCCTCTC[CG]CCCTCCCCCTTCCTCCTGGCGCGGGAGAGGCACCGGATATCCCCACCCTCCCCGAGCTCT	18	71050325	R	TSHZ1;ZADH2	-6.58988	0.034579	0.230932	1.19833	1.19857	1202	TSHZ1	teashirt zinc finger homeobox 1	10194	chr18:73001252:73001301:+
142	cg08035942	CCTTTAATCTTTTTGTTTTGGTTTGAATCTGCTCGGCGCAGACTGGCCAAGGATCCTCTC[CG]CCCTCCCCCTTCCTCCTGGCGCGGGAGAGGCACCGGATATCCCCACCCTCCCCGAGCTCT	18	71050325	R	TSHZ1;ZADH2	-6.58988	0.000716529	0.980202	0.0248213	0.0248213	1202	ZADH2	zinc binding alcohol dehydrogenase domain containing 2	284273	chr18:72910674:72910723:-
143	cg08067365	TGTGCCTCAGGCTTATAATAGGGCCGGTGCTGCCTGCCGAAGCCGGCGGCTGAGAGGCAG[CG]AACTCATCTTTGCCAGTACAGGAGCTTGTGCCGTGGCCCACAGCCCACAGCCCACAGCCA	1	938756	F	ISG15;ISG15	-11.5198	-0.100851	0.000462134	-3.50551	3.5115	1202	ISG15	ISG15 ubiquitin-like modifier	9636	chr1:949677:949726:+
144	cg08074477	CAGACCTGCCTTAAAAGCAGCTTGCCCGCCTTCTCTCCTCCCCTCCGGGCGGGCCCTGCA[CG]TGGCCCTGACAGCAGTAGGCCCCACCCCTGCTGGATCCAGTGAGCTCAGGTGGGGCTGGC	17	35911475	F	TNS4	1.90273	-0.00143827	0.960272	-0.049823	0.049823	1202	TNS4	tensin 4	84951	chr17:38632316:38632365:-
145	cg08169325	AATGTGCTGGGTGCAGCTTTGGGTAATACATATGCCGAACCTTCTCTTTAAGGGTCCACG[CG]CAGCCTCGGGTGTGAATGAAGGAGAAGAGATCGTGTACCACACATGATGCTTACGGAGCA	12	129890076	R	STX2;STX2	-6.32278	0.0104347	0.717799	0.36148	0.361487	1202	STX2	syntaxin 2	2054	chr12:131280544:131280593:-
145	cg08169325	AATGTGCTGGGTGCAGCTTTGGGTAATACATATGCCGAACCTTCTCTTTAAGGGTCCACG[CG]CAGCCTCGGGTGTGAATGAAGGAGAAGAGATCGTGTACCACACATGATGCTTACGGAGCA	12	129890076	R	STX2;STX2	-6.32278	-0.0359683	0.21272	-1.24652	1.24679	1202	STX2	syntaxin 2	2054	chr12:131274515:131274564:-
145	cg08169325	AATGTGCTGGGTGCAGCTTTGGGTAATACATATGCCGAACCTTCTCTTTAAGGGTCCACG[CG]CAGCCTCGGGTGTGAATGAAGGAGAAGAGATCGTGTACCACACATGATGCTTACGGAGCA	12	129890076	R	STX2;STX2	-6.32278	-0.0604453	0.0361386	-2.09644	2.09772	1202	STX2	syntaxin 2	2054	chr12:131274330:131274379:-
146	cg08212685	GCGCGGCAGTGGCCTCGCAGGGCGCTGGGTCCCTCTCCCCAGCTCTCCTCCCCCTGGCCC[CG]TCGCCCCGCCCTCGCCGGGCTGGGCTGCGGGGTCAGGGGCCGAGCGGAGAGGGGTGAGTA	5	81303827	R	ATG10;ATG10;ATG10;ATG10	0.0129441	0.0834959	0.00376942	2.89913	2.90252	1202	ATG10	autophagy related 10	83734	chr5:81550226:81550275:+
146	cg08212685	GCGCGGCAGTGGCCTCGCAGGGCGCTGGGTCCCTCTCCCCAGCTCTCCTCCCCCTGGCCC[CG]TCGCCCCGCCCTCGCCGGGCTGGGCTGCGGGGTCAGGGGCCGAGCGGAGAGGGGTGAGTA	5	81303827	R	ATG10;ATG10;ATG10;ATG10	0.0129441	0.20773	3.49039e-13	7.30227	7.35647	1202	ATG10	autophagy related 10	83734	chr5:81549905:81549954:+
147	cg08251399	GTGAGTGAGGGGCTCAAGAAACTCTACAAGAGCAAGCTGCTGCCCTTGGAAGAGCATTAC[CG]CTTCCACGAGTTCCACTCGCCCGCCCTGGAGGATGCCGACTTCGACAACAAGCCCATGGT	2	31311112	R	EHD3	0.755044	0.0457521	0.112875	1.58601	1.58656	1202	EHD3	EH domain containing 3	30845	chr2:31490940:31490989:+
148	cg08331960	TCGGGGTCCCTTGGCCTGGAGACCCTTTGTCCAACCCGTCGCCCACCTCAAGACCTGCCT[CG]ATGCTGCGCATACAGTAGGTATCCAATAAATGTTCCTGGGATAGAAGGCAAAGGCGCTGG	16	2016598	F	SLC9A3R2;SLC9A3R2	-20.7074	-0.0257088	0.373176	-0.890774	0.890872	1202	SLC9A3R2	SLC9A3 regulator 2	9351	chr16:2088067:2088116:+
149	cg08424423	AGCCAGCAGCAGTGCCATCATCCCGTGCCCACCCACACGCCCCATCCAGGGTGCCCGAGA[CG]AGCCCATCTCGGACTGCACGGCCTCCTGACTGATGGCAGCTCAAGGACACCCGGGTCCTT	6	31196167	F	CDSN;PSORS1C1	-1.15684	0.0372664	0.19666	1.29154	1.29184	1202	CDSN	corneodesmosin	1041	chr6:31083038:31083087:-
149	cg08424423	AGCCAGCAGCAGTGCCATCATCCCGTGCCCACCCACACGCCCCATCCAGGGTGCCCGAGA[CG]AGCCCATCTCGGACTGCACGGCCTCCTGACTGATGGCAGCTCAAGGACACCCGGGTCCTT	6	31196167	F	CDSN;PSORS1C1	-1.15684	-0.0194643	0.500192	-0.674349	0.674392	1202	PSORS1C1	psoriasis susceptibility 1 candidate 1	170679	chr6:31107577:31107626:+
150	cg08475827	CCACTATGTTCAGTCTAGTGAGTCTGAGCAATTAACTCACATTTTGAATTTCAAGTCTCT[CG]CCTTAGGCAAAACACCACCACCTGATGCTCACCAGAGGGGCGTGACGCGGCAGCTGGGCA	2	151974476	R	RIF1	3.70275	0.0524159	0.0692766	1.81741	1.81824	1202	RIF1	replication timing regulatory factor 1	55183	chr2:152332336:152332385:+
150	cg08475827	CCACTATGTTCAGTCTAGTGAGTCTGAGCAATTAACTCACATTTTGAATTTCAAGTCTCT[CG]CCTTAGGCAAAACACCACCACCTGATGCTCACCAGAGGGGCGTGACGCGGCAGCTGGGCA	2	151974476	R	RIF1	3.70275	0.0304901	0.290861	1.05654	1.0567	1202	RIF1	replication timing regulatory factor 1	55183	chr2:152322392:152322441:+
151	cg08487374	TGGGCAGTGGCGGGGCACGCAGGCGGCGATCAGAGGCTGTCCCGTCCTCTCCGGGGGCCG[CG]GCTCATCCTGCCAGGCATCTCCGAGGAAAGTTTGCTCTCCGGAAAAGAAGAAACCCGCGC	7	99914498	F	TSC22D4;TSC22D4	11.6734	-0.0212363	0.461988	-0.735758	0.735814	1202	TSC22D4	TSC22 domain family member 4	81628	chr7:100064496:100064545:-
152	cg08529529	AAACATGGATCAAGAAACTGTAGGCAATGTTGTCCTGTTGGCCATCGTCACCCTCATCAG[CG]TGGTCCAGAATGGTAAGGAAAGCCCTTCACTCAGGGAAGAACAGAAGGGGAGATTTTCTT	13	30207799	R	ALOX5AP	-10.227	-0.0993278	0.000563441	-3.4522	3.45791	1202	ALOX5AP	arachidonate 5-lipoxygenase activating protein	241	chr13:31338347:31338396:+
153	cg08586737	AGCGACAGAGCAACGTCGCACTGCATTCTTACCAAACACCCAGGTGAACGACGCATCCAA[CG]ATTTGGGAGCTCAGGACCCATGGTCCCTAAAAGGCAACAATTAAGACTCCCATTTAGACC	7	127013185	F	GCC1	2.69622	0.0566387	0.0496243	1.96412	1.96518	1202	GCC1	GRIP and coiled-coil domain containing 1	79571	chr7:127220731:127220780:-
154	cg08587542	GAAGAGAGGAGAGGTTTAGAGTCAAAGAGCCCCAAACATTAGTGAGAGTATATGTATGAA[CG]TTTGGTCATCTTAGAACAGTGGTTGGCATCCACAGGAGACCAGCAGAATCACATGGGCGC	5	141284084	F	KIAA0141;KIAA0141	-3.06398	-0.00378316	0.895755	-0.131053	0.131053	1202	KIAA0141	KIAA0141	9812	chr5:141319414:141319463:+
155	cg08654655	GGGGATCCCCAGTTGCCAAAGGATGGAGGGCGGAGCTGGAGGACCTCAGGCTAGTGAGCA[CG]CCCTTGCCCAGGCCTGCAGTGGCTGCACTCGCCAGCTGGCCCATGGCCCTGTCCGACTCC	1	157407687	F	CADM3;CADM3	1.97371	-0.0024991	0.931026	-0.0865717	0.0865717	1202	CADM3	cell adhesion molecule 3	57863	chr1:159171491:159171540:+
156	cg08668790	TCTTTTTGTGACTCTCAAGGAAAGTCGGTTTTCTGAGCTCTTACTGGCTTAGTAGCGTGG[CG]TTCAACGCAGAGCATTCTAGGTAATGTAGTTTTCATAGATCCCGAGGTGGGTGCCGGGGA	19	62912474	F	ZNF154	4.11211	-0.223054	5.11787e-15	-7.85893	7.92652	1202	ZNF154	zinc finger protein 154	7710	chr19:58212356:58212402:-
157	cg08694544	GAGAAGGGAGGCAGCTGCGGCAAAGTTAGAGCAAGTACTGCAGCAGCCAGGTTGGGTCCG[CG]CCGTCGGGTTTCTGAGAAAAGGGAGGAAAGAGGCGGGGCCTGCACGGTGTGTCCCCGCCC	19	12807228	R	RTBDN;RTBDN	2.48153	0.0403972	0.161609	1.40016	1.40054	1202	RTBDN	retbindin	83546	chr19:12936342:12936391:-
157	cg08694544	GAGAAGGGAGGCAGCTGCGGCAAAGTTAGAGCAAGTACTGCAGCAGCCAGGTTGGGTCCG[CG]CCGTCGGGTTTCTGAGAAAAGGGAGGAAAGAGGCGGGGCCTGCACGGTGTGTCCCCGCCC	19	12807228	R	RTBDN;RTBDN	2.48153	0.0102227	0.723293	0.354138	0.354144	1202	RTBDN	retbindin	83546	chr19:12945929:12945978:-
157	cg08694544	GAGAAGGGAGGCAGCTGCGGCAAAGTTAGAGCAAGTACTGCAGCAGCCAGGTTGGGTCCG[CG]CCGTCGGGTTTCTGAGAAAAGGGAGGAAAGAGGCGGGGCCTGCACGGTGTGTCCCCGCCC	19	12807228	R	RTBDN;RTBDN	2.48153	0.0627728	0.0295398	2.17738	2.17881	1202	RTBDN	retbindin	83546	chr19:12940636:12940685:-
158	cg08872493	TTCCTATCCCACTGATCGTTTTAGAGCCTGAACAGACAAAACATCCTGGTTACCAAGACT[CG]AAGAATGCATAAGCTGGGACCAGGCAAAACAAACAGATCACTGTGGGCTCACAGAGCAGG	1	23394004	F	HTR1D	1.54823	0.0256302	0.37464	0.888049	0.888146	1202	HTR1D	5-hydroxytryptamine receptor 1D	3352	chr1:23518651:23518700:-
159	cg08896629	GGGCAACGCGGCCGGATCCTGGAGTTCCCCTCCGTGCTGTGGAATTGGGTCAGGCGTGTA[CG]GTCCTGACCCTAGGACACAGCTGCATGTCCTCACCTCGGTGTTCAAAGCTGCACCGGCCA	19	10352577	F	TYK2	-16.3038	0.0108139	0.708004	0.374619	0.374626	1202	TYK2	tyrosine kinase 2	7297	chr19:10461237:10461286:-
160	cg08899632	GGGCGAGGCGTGAGAACGAGCATTTCTAAGTTCCCAGGTGATGCCCCTAGTGTTGGTCGG[CG]TCCACACTCTGAGGACAGTGACCTCTCTGCTCTGTCCCTCATGTCTTACTACTACTGTCT	20	50242407	R	ZFP64;ZFP64;ZFP64;ZFP64	11.0838	-0.0149529	0.604525	-0.518022	0.518042	1202	ZFP64	ZFP64 zinc finger protein	55734	chr20:50700813:50700862:-
160	cg08899632	GGGCGAGGCGTGAGAACGAGCATTTCTAAGTTCCCAGGTGATGCCCCTAGTGTTGGTCGG[CG]TCCACACTCTGAGGACAGTGACCTCTCTGCTCTGTCCCTCATGTCTTACTACTACTGTCT	20	50242407	R	ZFP64;ZFP64;ZFP64;ZFP64	11.0838	-0.0131031	0.649952	-0.45393	0.453943	1202	ZFP64	ZFP64 zinc finger protein	55734	chr20:50776686:50776735:-
161	cg08900043	AATCATCAAGGCCATTTTCAAATCCCATTGGTCTAGCCGTCACATGGTGAGAACCGAATG[CG]CGGATAATTACGGAGCTGATATTTCCCCCCCTCCCCTTCTTTTTCCTCCCTCCCCTCCAA	12	52665163	R	HOXC10	2.53683	0.045568	0.114333	1.57962	1.58016	1202	HOXC10	homeobox C10	3226	chr12:54383815:54383864:+
162	cg09045681	ACCGCATACAGCACAACTCAAGTTTGCATCAGACTGGGAAGCGAACTTAAGCCAGCGGTG[CG]TGGCCCAGGAGTGGGAAAGGAAATGGATGCCTGAAGTGGAAGAGGTGGTGCAGAGGGGGC	6	31235157	R	TCF19;TCF19;CCHCR1	0.117061	0.030951	0.283627	1.07252	1.07269	1202	CCHCR1	coiled-coil alpha-helical rod protein 1	54535	chr6_qbl_hap6:2406159:2406208:-
162	cg09045681	ACCGCATACAGCACAACTCAAGTTTGCATCAGACTGGGAAGCGAACTTAAGCCAGCGGTG[CG]TGGCCCAGGAGTGGGAAAGGAAATGGATGCCTGAAGTGGAAGAGGTGGTGCAGAGGGGGC	6	31235157	R	TCF19;TCF19;CCHCR1	0.117061	0.0141041	0.625194	0.488612	0.488628	1202	TCF19	transcription factor 19	6941	chr6_ssto_hap7:2466554:2466603:+
162	cg09045681	ACCGCATACAGCACAACTCAAGTTTGCATCAGACTGGGAAGCGAACTTAAGCCAGCGGTG[CG]TGGCCCAGGAGTGGGAAAGGAAATGGATGCCTGAAGTGGAAGAGGTGGTGCAGAGGGGGC	6	31235157	R	TCF19;TCF19;CCHCR1	0.117061	0.0338577	0.240813	1.17331	1.17354	1202	TCF19	transcription factor 19	6941	chr6_ssto_hap7:2465426:2465468:+
162	cg09045681	ACCGCATACAGCACAACTCAAGTTTGCATCAGACTGGGAAGCGAACTTAAGCCAGCGGTG[CG]TGGCCCAGGAGTGGGAAAGGAAATGGATGCCTGAAGTGGAAGAGGTGGTGCAGAGGGGGC	6	31235157	R	TCF19;TCF19;CCHCR1	0.117061	0.0476821	0.0984628	1.65301	1.65364	1202	TCF19	transcription factor 19	6941	chr6_ssto_hap7:2461656:2461705:+
163	cg09096950	TTTTATCTGCCCTCGGTACGCTGATTTCCAAAACCCAGCCTCATATTCTATACTCCAAAG[CG]CACTGCCAGGTGGGCCAACTCCAGCCCCCACAATCCGATGCCAAGGCCACTTCTTGCCAC	11	117735305	F	UBE4A	0.684631	-0.0156697	0.587314	-0.542857	0.54288	1202	UBE4A	ubiquitination factor E4A	9354	chr11:118269576:118269625:+
164	cg09196959	GTTTATAGTGGTCTGGCTTTTGGCCATGACAATGACACCTTGCCCTTTTAATTTGGGGCC[CG]TGCAAATATTCACTGAAAGCTGTCAAGAGGAAAACAGAATTGGTTATTGAATCACTTGCT	6	30212419	R	TRIM40	0.260323	-0.00574745	0.842218	-0.1991	0.199101	1202	TRIM40	tripartite motif containing 40	135644	chr6:30114861:30114910:+
200	cg11459714	TGGGGTTGGAGCTGGGCTGTGGCACTGGACTGCGTTCGGGGACGGGGGACGCAGCCAGAA[CG]CGAGGGTGGTAGGGAAATATTGGGGGTTTCGCGTGCACCGAAGGGAATGGGAGGAGAAGA	19	56212470	R	KLK10;KLK10;KLK10	-4.21298	-0.00824425	0.775235	-0.285596	0.285599	1202	KLK10	kallikrein related peptidase 10	5655	chr19:51523135:51523184:-
200	cg11459714	TGGGGTTGGAGCTGGGCTGTGGCACTGGACTGCGTTCGGGGACGGGGGACGCAGCCAGAA[CG]CGAGGGTGGTAGGGAAATATTGGGGGTTTCGCGTGCACCGAAGGGAATGGGAGGAGAAGA	19	56212470	R	KLK10;KLK10;KLK10	-4.21298	0.00439224	0.879092	0.152153	0.152153	1202	KLK10	kallikrein related peptidase 10	5655	chr19:51517845:51517894:-
166	cg09294589	AAGTGCGGCCCTTGGGCCCGCAGCATTAGCCTCATCAGGGTGCTGGTTAAACACACAAAT[CG]TCAGACCTCCACCCCAGACTTTCTGAATCAGAAACTCTGGGGGCACAGCCCAGGAATCTT	3	33130137	R	CRTAP	-0.1578	0.0144439	0.616882	0.500387	0.500405	1202	CRTAP	NA	NA	chr3:33165865:33165898:+
166	cg09294589	AAGTGCGGCCCTTGGGCCCGCAGCATTAGCCTCATCAGGGTGCTGGTTAAACACACAAAT[CG]TCAGACCTCCACCCCAGACTTTCTGAATCAGAAACTCTGGGGGCACAGCCCAGGAATCTT	3	33130137	R	CRTAP	-0.1578	0.0224426	0.436941	0.777565	0.77763	1202	CRTAP	cartilage associated protein	10491	chr3:33165900:33165949:+
166	cg09294589	AAGTGCGGCCCTTGGGCCCGCAGCATTAGCCTCATCAGGGTGCTGGTTAAACACACAAAT[CG]TCAGACCTCCACCCCAGACTTTCTGAATCAGAAACTCTGGGGGCACAGCCCAGGAATCTT	3	33130137	R	CRTAP	-0.1578	-0.0492485	0.0878779	-1.7074	1.70809	1202	CRTAP	cartilage associated protein	10491	chr3:33189081:33189130:+
167	cg09304040	CAGGGAAACGCGGGAAGCAGGGGCGGGGCCTCTGGTGGCGGTCGGGAACTCGGTGGGAGG[CG]GCAACATTGTTTCAAGTTGGCCAAATTGACAAGAGCGAGAGGTATACTGCGTTCCATCCC	12	54646874	F	CDK2;CDK2;CDK2;SILV;CDK2	3.54841	0.0452402	0.116964	1.56824	1.56877	1202	CDK2	cyclin dependent kinase 2	1017	chr12:56363262:56363311:+
167	cg09304040	CAGGGAAACGCGGGAAGCAGGGGCGGGGCCTCTGGTGGCGGTCGGGAACTCGGTGGGAGG[CG]GCAACATTGTTTCAAGTTGGCCAAATTGACAAGAGCGAGAGGTATACTGCGTTCCATCCC	12	54646874	F	CDK2;CDK2;CDK2;SILV;CDK2	3.54841	0.0532009	0.0652041	1.84468	1.84555	1202	CDK2	cyclin dependent kinase 2	1017	chr12:56366173:56366222:+
168	cg09322949	ATTTCCATGATAAAGTATCGTTTCCCTGGTAACAATAGCATTGGTCTTGAGAAGCTTCTC[CG]ATTGCAGCAGGACCTTTAAGCTGAGAACTGAAAAACGAATGGGAAGTGTTATGAGCAGAA	6	41998021	R	BYSL;MED20	3.78416	0.0473332	0.100954	1.64089	1.64151	1202	BYSL	bystin like	705	chr6:41900533:41900582:+
168	cg09322949	ATTTCCATGATAAAGTATCGTTTCCCTGGTAACAATAGCATTGGTCTTGAGAAGCTTCTC[CG]ATTGCAGCAGGACCTTTAAGCTGAGAACTGAAAAACGAATGGGAAGTGTTATGAGCAGAA	6	41998021	R	BYSL;MED20	3.78416	-0.0123296	0.669353	-0.427131	0.427142	1202	MED20	mediator complex subunit 20	9477	chr6:41873239:41873288:-
169	cg09404633	TCCTCGGGAGACAGGGTCTCCAGCAGGCTGTCGATGTCGGGGTCTTCACTCACCTGCCGG[CG]ATATTTGGCTACTCTAGACATCTTGGCAAAATGGGCTGTGGCTGCCAGGGGCTATCAGAG	1	200182069	F	LMOD1	-0.48176	0.03399	0.238978	1.1779	1.17813	1202	LMOD1	leiomodin 1	25802	chr1:201865866:201865915:-
170	cg09413557	CGGGATGGGGGAGCCCAGCAGTGCCCACTGCACGCCTGGTGACGAGTCTCCCCTCATCTG[CG]CAGCTCAGTTTGCTCAGTTTGCTCTTCGTGACACGTGACTCGGCAAGGGGAGCAGGAGGA	1	151775337	F	S100A6;S100A6	-3.40305	0.0060343	0.834454	0.209037	0.209038	1202	S100A6	S100 calcium binding protein A6	6277	chr1:153507183:153507232:-
171	cg09434995	AAAAAAAAGAAAAGAAAATACTTGATGGAAGGCTGCCATCACCATGCTGCAAAATCTCCA[CG]CCCCTGCTGCCCGCACCTGTCCTTCCTCCCTCCCTCCTCCCCTGGCCTGGGGAAGCCCCT	7	75878323	R	ZP3;SRCRB4D	0.0440779	0.0453326	0.116218	1.57144	1.57198	1202	SRCRB4D	scavenger receptor cysteine rich family member with 4 domains	136853	chr7:76018813:76018862:-
171	cg09434995	AAAAAAAAGAAAAGAAAATACTTGATGGAAGGCTGCCATCACCATGCTGCAAAATCTCCA[CG]CCCCTGCTGCCCGCACCTGTCCTTCCTCCCTCCCTCCTCCCCTGGCCTGGGGAAGCCCCT	7	75878323	R	ZP3;SRCRB4D	0.0440779	0.014045	0.626643	0.486566	0.486582	1202	ZP3	zona pellucida glycoprotein 3	7784	chr7:76054292:76054341:+
171	cg09434995	AAAAAAAAGAAAAGAAAATACTTGATGGAAGGCTGCCATCACCATGCTGCAAAATCTCCA[CG]CCCCTGCTGCCCGCACCTGTCCTTCCTCCCTCCCTCCTCCCCTGGCCTGGGGAAGCCCCT	7	75878323	R	ZP3;SRCRB4D	0.0440779	0.0690302	0.0166824	2.39509	2.39699	1202	ZP3	zona pellucida glycoprotein 3	7784	chr7:76062333:76062347:+,chr7:76062787:76062821:+
172	cg09480837	GAGGGAACACATATAGAAGGGATTAAGGGGTAGTTGATGACTCTTTGGGAAAAGAGGGTA[CG]GGAGAAGCAAGGGGAAGAAAGACATCTATTTGTCAAAGAGCAAAGGCAAGGCAAAGCTGG	10	95779491	F	PLCE1	-7.74183	0.0223188	0.439475	0.773274	0.773338	1202	PLCE1	phospholipase C epsilon 1	51196	chr10:96087874:96087923:+
173	cg09548179	GAGCCGCTCGCTCCCGACACGGCTCACGATGCGCGGCGAGCAGGGCGCGGCGGGGGCCCG[CG]TGCTCCAGTTCACTAACTGCCGGATCCTGCGCGGAGGGAAACTGCTCAGGTGGGCGCGGG	16	2510493	F	AMDHD2;AMDHD2	-19.0323	0.00608679	0.833035	0.210855	0.210856	1202	AMDHD2	amidohydrolase domain containing 2	51005	chr16:2579481:2579530:+
174	cg09556292	GGAAGCCCGGAGCCGCCCCTCCCCGCTCCCCCGCCCCGCCGCCCCGGACGGACGGGCGCG[CG]GAGCCAACCCCGCTGCCGCTGGCTGTCCAAATCCCACCAGAGCCAATGGGAGCGCGAGGG	14	102128568	F	RCOR1	-18.6194	-0.0178407	0.536614	-0.618087	0.618119	1202	RCOR1	REST corepressor 1	23186	chr14:103188711:103188753:+,chr14:103192805:103192811:+
175	cg09630437	GGAACGGTTCCGGCAGGGTTGGGTTTCCAGAGCTGTCCAGGGGCGCCTGGTGCTGAATCC[CG]CTTGGAAAGAGGCTTGGAGGTGGATGGGAAGGGATTTCCAACGGAGGCGGCTCCTCTCTC	19	2691301	R	SLC39A3;SLC39A3	0.165361	-0.0918745	0.00142909	-3.19163	3.19614	1202	SLC39A3	solute carrier family 39 member 3	29985	chr19:2737139:2737188:-
175	cg09630437	GGAACGGTTCCGGCAGGGTTGGGTTTCCAGAGCTGTCCAGGGGCGCCTGGTGCTGAATCC[CG]CTTGGAAAGAGGCTTGGAGGTGGATGGGAAGGGATTTCCAACGGAGGCGGCTCCTCTCTC	19	2691301	R	SLC39A3;SLC39A3	0.165361	-0.0788342	0.0062459	-2.73658	2.73942	1202	SLC39A3	solute carrier family 39 member 3	29985	chr19:2732557:2732606:-
175	cg09630437	GGAACGGTTCCGGCAGGGTTGGGTTTCCAGAGCTGTCCAGGGGCGCCTGGTGCTGAATCC[CG]CTTGGAAAGAGGCTTGGAGGTGGATGGGAAGGGATTTCCAACGGAGGCGGCTCCTCTCTC	19	2691301	R	SLC39A3;SLC39A3	0.165361	-0.0481508	0.095194	-1.66928	1.66993	1202	SLC39A3	solute carrier family 39 member 3	29985	chr19:2734766:2734815:-
176	cg09799873	CGCCTCTCTGGACCTCTTTTTTCATCTGTAGCTTGGGGATAACACTGACTAACATGGCCA[CG]CTGAGCACTGCAAATCTAGCCTGATTGCCAGTCAGAATGCACGCCCGGCCTCGCTGTTTC	19	8291500	R	NDUFA7;RPS28	-0.750651	0.0336118	0.244248	1.16479	1.16501	1202	RPS28	ribosomal protein S28	6234	chr2:232121024:232121073:+
176	cg09799873	CGCCTCTCTGGACCTCTTTTTTCATCTGTAGCTTGGGGATAACACTGACTAACATGGCCA[CG]CTGAGCACTGCAAATCTAGCCTGATTGCCAGTCAGAATGCACGCCCGGCCTCGCTGTTTC	19	8291500	R	NDUFA7;RPS28	-0.750651	-0.0215496	0.455408	-0.746614	0.746672	1202	RPS28	ribosomal protein S28	6234	chr19:8386961:8386975:+,chr19:8387156:8387190:+
176	cg09799873	CGCCTCTCTGGACCTCTTTTTTCATCTGTAGCTTGGGGATAACACTGACTAACATGGCCA[CG]CTGAGCACTGCAAATCTAGCCTGATTGCCAGTCAGAATGCACGCCCGGCCTCGCTGTTTC	19	8291500	R	NDUFA7;RPS28	-0.750651	0.0450843	0.118233	1.56283	1.56336	1202	RPS28	ribosomal protein S28	6234	chr7:71407244:71407293:+
176	cg09799873	CGCCTCTCTGGACCTCTTTTTTCATCTGTAGCTTGGGGATAACACTGACTAACATGGCCA[CG]CTGAGCACTGCAAATCTAGCCTGATTGCCAGTCAGAATGCACGCCCGGCCTCGCTGTTTC	19	8291500	R	NDUFA7;RPS28	-0.750651	0.0411729	0.153701	1.42708	1.42748	1202	RPS28	ribosomal protein S28	6234	chr7:71407364:71407413:+
176	cg09799873	CGCCTCTCTGGACCTCTTTTTTCATCTGTAGCTTGGGGATAACACTGACTAACATGGCCA[CG]CTGAGCACTGCAAATCTAGCCTGATTGCCAGTCAGAATGCACGCCCGGCCTCGCTGTTTC	19	8291500	R	NDUFA7;RPS28	-0.750651	-0.0223149	0.439554	-0.77314	0.773205	1202	NDUFA7	NADH:ubiquinone oxidoreductase subunit A7	4701	chr19:8376428:8376477:-
176	cg09799873	CGCCTCTCTGGACCTCTTTTTTCATCTGTAGCTTGGGGATAACACTGACTAACATGGCCA[CG]CTGAGCACTGCAAATCTAGCCTGATTGCCAGTCAGAATGCACGCCCGGCCTCGCTGTTTC	19	8291500	R	NDUFA7;RPS28	-0.750651	-0.00980202	0.734241	-0.339563	0.339568	1202	RPS28	ribosomal protein S28	6234	chr19:8387227:8387276:+
177	cg09809672	CCCCAGAGAGCTTTCATCTAGAAGGTTTGACTCTGGCCAGACAACCAGCGAGCATCTTCT[CG]CAATCTGTTGCTTCTTCCATGGCAAACTCCAGAGAATTAAGAAGCCAAACTCAACATCGC	1	234624305	R	EDARADD;EDARADD;EDARADD	-12.0992	0.0306555	0.28825	1.06227	1.06244	1202	EDARADD	EDAR associated death domain	128178	chr1:236557710:236557759:+
177	cg09809672	CCCCAGAGAGCTTTCATCTAGAAGGTTTGACTCTGGCCAGACAACCAGCGAGCATCTTCT[CG]CAATCTGTTGCTTCTTCCATGGCAAACTCCAGAGAATTAAGAAGCCAAACTCAACATCGC	1	234624305	R	EDARADD;EDARADD;EDARADD	-12.0992	-0.0251517	0.383625	-0.871464	0.871556	1202	EDARADD	EDAR associated death domain	128178	chr1:236647855:236647904:+
177	cg09809672	CCCCAGAGAGCTTTCATCTAGAAGGTTTGACTCTGGCCAGACAACCAGCGAGCATCTTCT[CG]CAATCTGTTGCTTCTTCCATGGCAAACTCCAGAGAATTAAGAAGCCAAACTCAACATCGC	1	234624305	R	EDARADD;EDARADD;EDARADD	-12.0992	0.0435939	0.130906	1.51109	1.51157	1202	EDARADD	EDAR associated death domain	128178	chr1:236558809:236558858:+
178	cg09851465	CCAACGGGTGAAGAGCCTAGGTGTTTTTGATCTGTGCCTTCTCTGTTCCTCAGAGATATG[CG]GGCGTCCTTCTAGAAGCCCATCTCGCTCACCTGTGTGGTCACCCTTGTCCCGCCCTTCCT	1	60312259	F	C1orf87	2.87994	0.0649501	0.024332	2.25311	2.2547	1202	C1orf87	chromosome 1 open reading frame 87	127795	chr1:60463281:60463298:-,chr1:60456474:60456505:-
178	cg09851465	CCAACGGGTGAAGAGCCTAGGTGTTTTTGATCTGTGCCTTCTCTGTTCCTCAGAGATATG[CG]GGCGTCCTTCTAGAAGCCCATCTCGCTCACCTGTGTGGTCACCCTTGTCCCGCCCTTCCT	1	60312259	F	C1orf87	2.87994	-0.030611	0.288952	-1.06073	1.06089	1202	C1orf87	chromosome 1 open reading frame 87	127795	chr1:60456235:60456284:-
179	cg09892203	TCGCCGCCTTCTCGCTCATGGCCATCGCCATCGGCACCGACTACTGGCTGTACTCCAGCG[CG]CACATCTGCAACGGCACCAACCTGACCATGGACGACGGGCCCCCGCCCCGCCGCGCCCGC	17	62391602	F	CACNG4	-33.4823	0.0253189	0.380471	0.877259	0.877353	1202	CACNG4	calcium voltage-gated channel auxiliary subunit gamma 4	27092	chr17:65029181:65029230:+
180	cg10052840	CTGTTGACCCGCAGGACTCGCTGGATGTTGAGGTCGTCAGCACCTTCTGCGGGGGTCAGG[CG]TCCGGGCCCGCTGCCCACAAACACGGGATAGTGGTTCAGGTCTGAGTGAGGGGGTGGAGA	19	4509119	R	SEMA6B	-5.67468	-0.023913	0.407491	-0.828529	0.828608	1202	SEMA6B	semaphorin 6B	10501	chr19:4542603:4542652:-
180	cg10052840	CTGTTGACCCGCAGGACTCGCTGGATGTTGAGGTCGTCAGCACCTTCTGCGGGGGTCAGG[CG]TCCGGGCCCGCTGCCCACAAACACGGGATAGTGGTTCAGGTCTGAGTGAGGGGGTGGAGA	19	4509119	R	SEMA6B	-5.67468	-0.00893843	0.756882	-0.309644	0.309649	1202	SEMA6B	semaphorin 6B	10501	chr19:4543178:4543227:-
180	cg10052840	CTGTTGACCCGCAGGACTCGCTGGATGTTGAGGTCGTCAGCACCTTCTGCGGGGGTCAGG[CG]TCCGGGCCCGCTGCCCACAAACACGGGATAGTGGTTCAGGTCTGAGTGAGGGGGTGGAGA	19	4509119	R	SEMA6B	-5.67468	-0.021914	0.44782	-0.759243	0.759304	1202	SEMA6B	semaphorin 6B	10501	chr19:4550177:4550226:-
181	cg10158181	GGCGGCGGCGCCAGGACATGGAGCTCGAGAACATCGTGGCCAACTCGCTGCTGCTGAAAG[CG]CGTCAAGGTGGGTGCGCGGCAGGCGCCCCCGACCCCCCCCCCAGAGAACCCCGAATCCCG	4	2935639	R	GRK4;NOP14;GRK4;GRK4	-10.188	-0.0108284	0.70763	-0.375123	0.37513	1202	GRK4	G protein-coupled receptor kinase 4	2868	chr4:3037214:3037250:+,chr4:3039101:3039113:+
181	cg10158181	GGCGGCGGCGCCAGGACATGGAGCTCGAGAACATCGTGGCCAACTCGCTGCTGCTGAAAG[CG]CGTCAAGGTGGGTGCGCGGCAGGCGCCCCCGACCCCCCCCCCAGAGAACCCCGAATCCCG	4	2935639	R	GRK4;NOP14;GRK4;GRK4	-10.188	0.0114084	0.692746	0.395217	0.395226	1202	GRK4	G protein-coupled receptor kinase 4	2868	chr4:3042384:3042433:+
181	cg10158181	GGCGGCGGCGCCAGGACATGGAGCTCGAGAACATCGTGGCCAACTCGCTGCTGCTGAAAG[CG]CGTCAAGGTGGGTGCGCGGCAGGCGCCCCCGACCCCCCCCCCAGAGAACCCCGAATCCCG	4	2935639	R	GRK4;NOP14;GRK4;GRK4	-10.188	-0.0141514	0.624033	-0.490252	0.490269	1202	GRK4	G protein-coupled receptor kinase 4	2868	chr4:3039129:3039178:+
181	cg10158181	GGCGGCGGCGCCAGGACATGGAGCTCGAGAACATCGTGGCCAACTCGCTGCTGCTGAAAG[CG]CGTCAAGGTGGGTGCGCGGCAGGCGCCCCCGACCCCCCCCCCAGAGAACCCCGAATCCCG	4	2935639	R	GRK4;NOP14;GRK4;GRK4	-10.188	-0.0207941	0.471367	-0.720433	0.720485	1202	GRK4	NA	NA	chr4:3013687:3013731:+
181	cg10158181	GGCGGCGGCGCCAGGACATGGAGCTCGAGAACATCGTGGCCAACTCGCTGCTGCTGAAAG[CG]CGTCAAGGTGGGTGCGCGGCAGGCGCCCCCGACCCCCCCCCCAGAGAACCCCGAATCCCG	4	2935639	R	GRK4;NOP14;GRK4;GRK4	-10.188	0.000666059	0.981596	0.023073	0.023073	1202	NOP14	NA	8602	chr9:33191870:33191919:-
181	cg10158181	GGCGGCGGCGCCAGGACATGGAGCTCGAGAACATCGTGGCCAACTCGCTGCTGCTGAAAG[CG]CGTCAAGGTGGGTGCGCGGCAGGCGCCCCCGACCCCCCCCCCAGAGAACCCCGAATCCCG	4	2935639	R	GRK4;NOP14;GRK4;GRK4	-10.188	-0.00128915	0.964388	-0.0446577	0.0446577	1202	NOP14	NOP14 nucleolar protein	8602	chr4:2940567:2940616:-
181	cg10158181	GGCGGCGGCGCCAGGACATGGAGCTCGAGAACATCGTGGCCAACTCGCTGCTGCTGAAAG[CG]CGTCAAGGTGGGTGCGCGGCAGGCGCCCCCGACCCCCCCCCCAGAGAACCCCGAATCCCG	4	2935639	R	GRK4;NOP14;GRK4;GRK4	-10.188	0.0559277	0.0525616	1.93942	1.94043	1202	NOP14	NOP14 nucleolar protein	8602	chr4:2940539:2940541:-,chr4:2939869:2939915:-
182	cg10202457	TCGCCCCCAGCCCACTTCACTCCATCACTGTCTTCCTTAGAGTTTATCCAGAAGGCAAGA[CG]TGGTATCCAAGCTCAGAACCAAGAGCCCACAGCATGGTGTGAGCTCTTTCTGCCTCTTGC	1	181654374	F	NMNAT2	-0.419706	0.0300646	0.29765	1.04178	1.04194	1202	NMNAT2	nicotinamide nucleotide adenylyltransferase 2	23057	chr1:183217577:183217626:-
182	cg10202457	TCGCCCCCAGCCCACTTCACTCCATCACTGTCTTCCTTAGAGTTTATCCAGAAGGCAAGA[CG]TGGTATCCAAGCTCAGAACCAAGAGCCCACAGCATGGTGTGAGCTCTTTCTGCCTCTTGC	1	181654374	F	NMNAT2	-0.419706	0.0184874	0.521948	0.640497	0.640534	1202	NMNAT2	nicotinamide nucleotide adenylyltransferase 2	23057	chr1:183273951:183274000:-
182	cg10202457	TCGCCCCCAGCCCACTTCACTCCATCACTGTCTTCCTTAGAGTTTATCCAGAAGGCAAGA[CG]TGGTATCCAAGCTCAGAACCAAGAGCCCACAGCATGGTGTGAGCTCTTTCTGCCTCTTGC	1	181654374	F	NMNAT2	-0.419706	-0.00694637	0.809879	-0.240633	0.240635	1202	NMNAT2	nicotinamide nucleotide adenylyltransferase 2	23057	chr1:183387374:183387423:-
183	cg10225525	GTGATGTTTAGAACCTTTTGGGGGATTCCTTCTCTCTCAGAATTTAACCTGGCAAGAGAA[CG]ACTGAGTTCTAGGAATTTTCTTGTCTGGAGAGAGTAAAATAAATGTATTTTTTAAAAGCT	14	64946618	F	FUT8;FUT8	11.8108	0.0480177	0.0961135	1.66466	1.6653	1202	FUT8	fucosyltransferase 8	2530	chr14:66209496:66209545:+
183	cg10225525	GTGATGTTTAGAACCTTTTGGGGGATTCCTTCTCTCTCAGAATTTAACCTGGCAAGAGAA[CG]ACTGAGTTCTAGGAATTTTCTTGTCTGGAGAGAGTAAAATAAATGTATTTTTTAAAAGCT	14	64946618	F	FUT8;FUT8	11.8108	0.0329957	0.253006	1.14342	1.14363	1202	FUT8	NA	2530	chr14:66083859:66083908:+
184	cg10523019	CTCGCTGCTTCTCCCCTAGTCTTCGGGTCCCTTGAACGCAGGTCGCTTGTTTGCCTTACG[CG]TAGTCAGCGGCCAGTGGCTATTTATGGCAGTAAGGAATATTATCCACATTTCACATGGAG	2	227408702	F	RHBDD1;RHBDD1	5.94162	-0.0121739	0.673285	-0.421736	0.421747	1202	RHBDD1	rhomboid domain containing 1	84236	chr2:227861127:227861176:+
184	cg10523019	CTCGCTGCTTCTCCCCTAGTCTTCGGGTCCCTTGAACGCAGGTCGCTTGTTTGCCTTACG[CG]TAGTCAGCGGCCAGTGGCTATTTATGGCAGTAAGGAATATTATCCACATTTCACATGGAG	2	227408702	F	RHBDD1;RHBDD1	5.94162	-0.0564897	0.0502279	-1.95895	1.95999	1202	RHBDD1	rhomboid domain containing 1	84236	chr2:227860998:227861047:+
185	cg10570177	TAAGCTGTCCAGACCTGGCTTGAAAACCCATCCCATGGCAAGGCAGGGATTCGCTGGCCG[CG]GTTGGCTCTATCTTGATCTGAGCAAGCCGCTGGACGTCCCTAGTTATCTTCTTCCTATCC	9	135314407	F	C9orf7;C9orf7	2.35876	-0.00385518	0.893782	-0.133548	0.133548	1202	C9orf7	calcium channel flower domain containing 1	11094	chr9:136335556:136335605:+
186	cg10591174	CTCTCTGCAGCCCAGGAACAATAAATACTTCCTCCCCATGTTTAAAAATAACCCCATGAC[CG]CTTTTGGCAGTCATAGGTGAGGCGGGCACCACCTAAGGCCCCCCCACCCCATGCCGTTCT	12	109842829	R	MYL2	-1.28017	0.010704	0.710838	0.370811	0.370818	1202	MYL2	myosin light chain 2	4633	chr12:111348925:111348974:-
186	cg10591174	CTCTCTGCAGCCCAGGAACAATAAATACTTCCTCCCCATGTTTAAAAATAACCCCATGAC[CG]CTTTTGGCAGTCATAGGTGAGGCGGGCACCACCTAAGGCCCCCCCACCCCATGCCGTTCT	12	109842829	R	MYL2	-1.28017	-0.0184265	0.52332	-0.638387	0.638423	1202	MYL2	myosin light chain 2	4633	chr12:111348710:111348759:-
187	cg10636246	GAGAATCTGAAAATGAGACCCAAGCGAAAGTATAGACATTTTATTGTGGAGCAAAACCAA[CG]ACACCCTCAAGGGAGGAGTGCAGGCACTCAAAGATTTGAGTCACAGGCAATGTGGTTCAC	1	157313597	F	AIM2	-12.9549	-0.104398	0.000288282	-3.62968	3.63632	1202	AIM2	absent in melanoma 2	9447	chr1:159033383:159033432:-
187	cg10636246	GAGAATCTGAAAATGAGACCCAAGCGAAAGTATAGACATTTTATTGTGGAGCAAAACCAA[CG]ACACCCTCAAGGGAGGAGTGCAGGCACTCAAAGATTTGAGTCACAGGCAATGTGGTTCAC	1	157313597	F	AIM2	-12.9549	-0.212052	1.09582e-13	-7.45887	7.51664	1202	AIM2	absent in melanoma 2	9447	chr1:159035731:159035780:-
264	cg14281160	CATGATACTCATGTATTTCCTTAGATCAAGTCAGCCTAGATCAGGTGTTCTTCCAGAGGC[CG]TATTGAGATCATTTTTATTTGCAGCCTGTGCATTTTCTCATCTCGGGTGATGGCCTCACA	12	64811210	R	LLPH	21.1115	0.0247939	0.390429	0.859063	0.859151	1202	LLPH	LLP homolog, long-term synaptic facilitation	84298	chr12:66517347:66517396:-
264	cg14281160	CATGATACTCATGTATTTCCTTAGATCAAGTCAGCCTAGATCAGGTGTTCTTCCAGAGGC[CG]TATTGAGATCATTTTTATTTGCAGCCTGTGCATTTTCTCATCTCGGGTGATGGCCTCACA	12	64811210	R	LLPH	21.1115	0.0271148	0.347596	0.939515	0.93963	1202	LLPH	LLP homolog, long-term synaptic facilitation	84298	chr12:66516932:66516981:-
264	cg14281160	CATGATACTCATGTATTTCCTTAGATCAAGTCAGCCTAGATCAGGTGTTCTTCCAGAGGC[CG]TATTGAGATCATTTTTATTTGCAGCCTGTGCATTTTCTCATCTCGGGTGATGGCCTCACA	12	64811210	R	LLPH	21.1115	-0.0173655	0.54752	-0.60162	0.601651	1202	LLPH	NA	84298	chr2:222809007:222809056:+
264	cg14281160	CATGATACTCATGTATTTCCTTAGATCAAGTCAGCCTAGATCAGGTGTTCTTCCAGAGGC[CG]TATTGAGATCATTTTTATTTGCAGCCTGTGCATTTTCTCATCTCGGGTGATGGCCTCACA	12	64811210	R	LLPH	21.1115	-0.0233112	0.419398	-0.807671	0.807744	1202	LLPH	LLP homolog, long-term synaptic facilitation	84298	chr2:222809401:222809450:+
264	cg14281160	CATGATACTCATGTATTTCCTTAGATCAAGTCAGCCTAGATCAGGTGTTCTTCCAGAGGC[CG]TATTGAGATCATTTTTATTTGCAGCCTGTGCATTTTCTCATCTCGGGTGATGGCCTCACA	12	64811210	R	LLPH	21.1115	-0.000267412	0.99261	-0.00926343	0.00926343	1202	LLPH	NA	84298	chr2:222809006:222809055:+
264	cg14281160	CATGATACTCATGTATTTCCTTAGATCAAGTCAGCCTAGATCAGGTGTTCTTCCAGAGGC[CG]TATTGAGATCATTTTTATTTGCAGCCTGTGCATTTTCTCATCTCGGGTGATGGCCTCACA	12	64811210	R	LLPH	21.1115	0.0193108	0.50358	0.669028	0.669069	1202	LLPH	protein LLP homolog	NA	chr22:42073118:42073167:-
189	cg10667970	TAGCCACCTCCTAGCACCTCAGGTTTTTTACCTTTGAGTCTATGAAGCCTGCGGAGGTCA[CG]CCCTAGGGAAAGAAGGAGCCCACTGGGTGTCAGGTCCTGCCTCTAGGGAGGGGACCGCGG	1	11646644	R	FBXO6	-0.494137	-0.0924024	0.00134075	-3.21007	3.21467	1202	FBXO6	F-box protein 6	26270	chr1:11733996:11734045:+
190	cg10669058	GAGAAGGGCGGTGGAGTGGGACTTCCCGCTGGCCTAGAAAACTTCAGCTAGGGCTGGGGG[CG]GTGGCTCCTGCCTGTAATCTCAGCACTTTGGGAGGCTGAGGCTGGAGGATCGCTTAAGGC	19	19509555	R	CILP2	-1.64916	0.0289743	0.315523	1.00398	1.00412	1202	CILP2	cartilage intermediate layer protein 2	148113	chr19:19656596:19656645:+
192	cg10878896	GGCTTTTCCCTTTGACCTTAACACTTTTGGGGTTATCTCTGAGGCGAATGCTAAAGGAGA[CG]CTCCAGGACTCGACCTCTGAAGGTCCTTGGAGCCAATTCCGTAATATGATCATGGAAACT	12	54980716	F	CS	5.34075	-0.00186712	0.94844	-0.0646789	0.0646789	1202	CS	NA	1431	chr12:56692401:56692450:-
192	cg10878896	GGCTTTTCCCTTTGACCTTAACACTTTTGGGGTTATCTCTGAGGCGAATGCTAAAGGAGA[CG]CTCCAGGACTCGACCTCTGAAGGTCCTTGGAGCCAATTCCGTAATATGATCATGGAAACT	12	54980716	F	CS	5.34075	-0.0315131	0.27497	-1.09201	1.09219	1202	CS	citrate synthase	1431	chr12:56665618:56665667:-
192	cg10878896	GGCTTTTCCCTTTGACCTTAACACTTTTGGGGTTATCTCTGAGGCGAATGCTAAAGGAGA[CG]CTCCAGGACTCGACCTCTGAAGGTCCTTGGAGCCAATTCCGTAATATGATCATGGAAACT	12	54980716	F	CS	5.34075	0.00668692	0.816852	0.231645	0.231647	1202	CS	citrate synthase	1431	chr12:56666121:56666170:-
192	cg10878896	GGCTTTTCCCTTTGACCTTAACACTTTTGGGGTTATCTCTGAGGCGAATGCTAAAGGAGA[CG]CTCCAGGACTCGACCTCTGAAGGTCCTTGGAGCCAATTCCGTAATATGATCATGGAAACT	12	54980716	F	CS	5.34075	-0.0166836	0.563362	-0.577989	0.578016	1202	CS	citrate synthase	1431	chr12:56665556:56665605:-
192	cg10878896	GGCTTTTCCCTTTGACCTTAACACTTTTGGGGTTATCTCTGAGGCGAATGCTAAAGGAGA[CG]CTCCAGGACTCGACCTCTGAAGGTCCTTGGAGCCAATTCCGTAATATGATCATGGAAACT	12	54980716	F	CS	5.34075	0.0200059	0.488341	0.693117	0.693163	1202	CS	NA	1431	chr6:81266709:81266758:-
193	cg10900550	AGAGACTGTGTCCACCGTCATTGAAAGGGTAATGCTTGAGAAAGGCCTGAAGGATATGGG[CG]GACAGAGTGTGTGTCTAGGGCAATAAAAAGTAACTGCTCCAGATGTTGAAGAAAATAATG	9	99213805	F	TDRD7	-0.993402	-0.0388586	0.178196	-1.34678	1.34712	1202	TDRD7	tudor domain containing 7	23424	chr9:100258242:100258291:+
194	cg10917602	AAGAGGGCCCCTCCAGGCCAGTCTGGGCACCCTGGGATAGCGGCTGCAGGTAGGCAGAGG[CG]CTGCCAGTGCCCAGGTGGCCTTTCCCTCCATCCGGCCCTTCCCACCTTCCTATAACCTTC	16	30904131	R	HSD3B7;HSD3B7;HSD3B7	-2.8153	-0.2671	4.409e-21	-9.48258	9.60146	1202	HSD3B7	hydroxy-delta-5-steroid dehydrogenase, 3 beta- and steroid delta-isomerase 7	80270	chr16:31000060:31000109:+
195	cg10922280	GAGGCAGCAGTAGAAACAGTTTGCTCCAAGGACCAAACTTATTCTGGTGTGCAGCTCACT[CG]CCCCTACTCATCTCCAGTGTATTTCAAGAGTATGCAGGGAAGGAAAAAGTCAGGCTGAGT	16	66591728	R	DPEP2	10.7901	-0.246861	3.80454e-18	-8.73187	8.82463	1202	DPEP2	dipeptidase 2	64174	chr16:68021393:68021442:-
196	cg11177450	AGCGGACGCCTGGGCCAGGCCTCACAACGTCCAGAGCTGGAATGGGTCTTTTGCTTTCGG[CG]CAGGGGTGACGGGATCAGCGGAGGGTAGGGGTGTACACTAGCTGCGGTCTGATTTAGCCC	3	198078873	R	SENP5	-10.9467	0.0777784	0.00697888	2.69978	2.70251	1202	SENP5	SUMO1/sentrin specific peptidase 5	205564	chr3:196657733:196657782:+
196	cg11177450	AGCGGACGCCTGGGCCAGGCCTCACAACGTCCAGAGCTGGAATGGGTCTTTTGCTTTCGG[CG]CAGGGGTGACGGGATCAGCGGAGGGTAGGGGTGTACACTAGCTGCGGTCTGATTTAGCCC	3	198078873	R	SENP5	-10.9467	0.00644913	0.823255	0.223408	0.223409	1202	SENP5	SUMO1/sentrin specific peptidase 5	205564	chr3:196661213:196661262:+
197	cg11233384	AGGGCTGTCGCGCCTGCCGTGTGGTCCTGGAGAATGAGGCTTACCAAAGGCTCAAGACAG[CG]TCCCCATGGAGTGACATGGTTAAAGTGTTGAAAGAAAAGAACTGTTGGCATTGAATTCTG	1	19488289	F	AKR7A3	-8.70216	-0.0600983	0.0372225	-2.08438	2.08564	1202	AKR7A3	aldo-keto reductase family 7 member A3	22977	chr1:19609185:19609234:-
197	cg11233384	AGGGCTGTCGCGCCTGCCGTGTGGTCCTGGAGAATGAGGCTTACCAAAGGCTCAAGACAG[CG]TCCCCATGGAGTGACATGGTTAAAGTGTTGAAAGAAAAGAACTGTTGGCATTGAATTCTG	1	19488289	F	AKR7A3	-8.70216	0.0673027	0.0196169	2.33496	2.33673	1202	AKR7A3	aldo-keto reductase family 7 member A3	22977	chr1:19614990:19615012:-,chr1:19612840:19612866:-
198	cg11237115	GGTTCGCTGACGCTCAGTGTTTTGGCCCGGACGGTCACATGTTTCCTTTGTTGTGAGCTG[CG]GCAGAGACTGGTGGCTGGAGGAGACGCCGGCGCTGGAGAGTGCGCTGCGCCGCCCGCCGC	3	184836116	R	KLHL24;KLHL24	-16.2433	-0.0281399	0.329668	-0.975051	0.97518	1202	KLHL24	kelch like family member 24	54800	chr3:183402079:183402128:+
199	cg11426590	CCAGGGAAGCGAAGCCCAGCTGTTCCTTCGGGGTGTGTACTTGGAACTGCATCCAGGTCT[CG]CTTAGGGTCCCCGCGGCGAGGCGGAGCAGCTAATTTGAGAGCACAACAAATAAACAAGGA	1	33420441	R	TRIM62	-24.7858	-0.0178589	0.536198	-0.618717	0.61875	1202	TRIM62	tripartite motif containing 62	55223	chr1:33647602:33647651:-
199	cg11426590	CCAGGGAAGCGAAGCCCAGCTGTTCCTTCGGGGTGTGTACTTGGAACTGCATCCAGGTCT[CG]CTTAGGGTCCCCGCGGCGAGGCGGAGCAGCTAATTTGAGAGCACAACAAATAAACAAGGA	1	33420441	R	TRIM62	-24.7858	0.00758864	0.792684	0.262883	0.262886	1202	TRIM62	tripartite motif containing 62	55223	chr1:33611288:33611337:-
201	cg11487705	CGGATCGCGGGGAAGTTCCTCTCAGCGCCTCAGGTGTCTGGGCGTGTGCAGCTGTGTTGG[CG]CACACTTGCCGCTACAGCCCTTCTGTCAGCCCTTTAGCTTCGATGGGGCGCTGGTGGCCG	5	41906503	R	OXCT1;OXCT1	-5.06266	-0.0555443	0.0542048	-1.92609	1.92709	1202	OXCT1	3-oxoacid CoA-transferase 1	5019	chr5:41730689:41730738:-
202	cg11490446	TAAAGAAATGACAGGTGTTAAATTTAGGATGGCCATCGCTTGTATGCCGGGAGAAGCACA[CG]CTGGGCCCAATTTATATAGGGGCTTTCGTCCTCAGCTCGAGCAGCCTCAGAACCCCGACA	14	72672676	F	PSEN1;PSEN1	1.96143	-0.0531588	0.0654175	-1.84321	1.84408	1202	PSEN1	NA	5663	chr14:73603820:73603869:+
202	cg11490446	TAAAGAAATGACAGGTGTTAAATTTAGGATGGCCATCGCTTGTATGCCGGGAGAAGCACA[CG]CTGGGCCCAATTTATATAGGGGCTTTCGTCCTCAGCTCGAGCAGCCTCAGAACCCCGACA	14	72672676	F	PSEN1;PSEN1	1.96143	0.0276239	0.338616	0.957163	0.957285	1202	PSEN1	presenilin 1	5663	chr14:73603221:73603270:+
202	cg11490446	TAAAGAAATGACAGGTGTTAAATTTAGGATGGCCATCGCTTGTATGCCGGGAGAAGCACA[CG]CTGGGCCCAATTTATATAGGGGCTTTCGTCCTCAGCTCGAGCAGCCTCAGAACCCCGACA	14	72672676	F	PSEN1;PSEN1	1.96143	-0.0201084	0.486115	-0.69667	0.696717	1202	PSEN1	presenilin 1	5663	chr14:73678625:73678650:+,chr14:73683834:73683857:+
202	cg11490446	TAAAGAAATGACAGGTGTTAAATTTAGGATGGCCATCGCTTGTATGCCGGGAGAAGCACA[CG]CTGGGCCCAATTTATATAGGGGCTTTCGTCCTCAGCTCGAGCAGCCTCAGAACCCCGACA	14	72672676	F	PSEN1;PSEN1	1.96143	-0.0204157	0.479476	-0.707318	0.707367	1202	PSEN1	NA	5663	chr14:73675549:73675598:+
203	cg11600161	CATAAAAGAGGAGACATAGGGGGCTTGGTGAGATACCCTGAAACCTCCCCCCTCTGACCC[CG]CAGCCAGGCCCCAGGCTGGCCGGGAGTGGCCCCTCACACTGGTTCTCCCCACTTTCTCTG	11	66928161	F	TBC1D10C	-15.5718	-0.169286	3.51161e-09	-5.92125	5.95012	1202	TBC1D10C	TBC1 domain family member 10C	374403	chr11:67177372:67177421:+
204	cg11618577	CCTCGCGCTGATCTTGGTGGGCCACGTGAACCTGCTGCTGGGGGCCGTGCTGCATGGCAC[CG]TCCTGCGGCACGTGGCCAATCCCCGCGGCGCTGTCACGCCGGAGTACACCGTAGCCAATG	2	27519047	R	KRTCAP3;KRTCAP3	0.455906	0.0352763	0.221657	1.22251	1.22277	1202	KRTCAP3	keratinocyte associated protein 3	200634	chr2:27666372:27666399:+,chr2:27666816:27666835:+
205	cg11631518	GAGTGGGTGGGTGGGTCTGGAGAAGCTATGTGTACCAACCAGGTTCACATATTTTTCTTC[CG]TGAAGCTCTGTCTCCACCCTCTCTGGAGCTTCTGCCTGCCTTATTTACACCCCACTCTCC	12	73889852	R	KCNC2;KCNC2;KCNC2	6.46148	0.0660143	0.0220897	2.29013	2.2918	1202	KCNC2	potassium voltage-gated channel subfamily C member 2	3747	chr12:75444191:75444240:-
205	cg11631518	GAGTGGGTGGGTGGGTCTGGAGAAGCTATGTGTACCAACCAGGTTCACATATTTTTCTTC[CG]TGAAGCTCTGTCTCCACCCTCTCTGGAGCTTCTGCCTGCCTTATTTACACCCCACTCTCC	12	73889852	R	KCNC2;KCNC2;KCNC2	6.46148	0.0145909	0.613303	0.505479	0.505497	1202	KCNC2	potassium voltage-gated channel subfamily C member 2	3747	chr12:75444655:75444704:-
205	cg11631518	GAGTGGGTGGGTGGGTCTGGAGAAGCTATGTGTACCAACCAGGTTCACATATTTTTCTTC[CG]TGAAGCTCTGTCTCCACCCTCTCTGGAGCTTCTGCCTGCCTTATTTACACCCCACTCTCC	12	73889852	R	KCNC2;KCNC2;KCNC2	6.46148	0.0350199	0.225036	1.21362	1.21387	1202	KCNC2	potassium voltage-gated channel subfamily C member 2	3747	chr12:75436928:75436977:-
206	cg11833861	GGGGGAAAGTAAGGGAGAGAGAAAGAGACGGAGAAAAACAGGAAAACTTACTCTTCAGTA[CG]CAGGGAAGAATAGAGAAAGAAAAACACAAAGAAACGCCACGCAGACTGCAGAGAAGGACC	17	28279748	F	TMEM98;TMEM98	-5.21011	0.00334795	0.90769	0.115977	0.115977	1202	TMEM98	transmembrane protein 98	26022	chr14:59294338:59294387:-
206	cg11833861	GGGGGAAAGTAAGGGAGAGAGAAAGAGACGGAGAAAAACAGGAAAACTTACTCTTCAGTA[CG]CAGGGAAGAATAGAGAAAGAAAAACACAAAGAAACGCCACGCAGACTGCAGAGAAGGACC	17	28279748	F	TMEM98;TMEM98	-5.21011	0.0561646	0.0515671	1.94765	1.94867	1202	TMEM98	transmembrane protein 98	26022	chr17:31263433:31263465:+,chr17:31266495:31266508:+
206	cg11833861	GGGGGAAAGTAAGGGAGAGAGAAAGAGACGGAGAAAAACAGGAAAACTTACTCTTCAGTA[CG]CAGGGAAGAATAGAGAAAGAAAAACACAAAGAAACGCCACGCAGACTGCAGAGAAGGACC	17	28279748	F	TMEM98;TMEM98	-5.21011	0.037247	0.196894	1.29087	1.29117	1202	TMEM98	transmembrane protein 98	26022	chr17:31268482:31268531:+
206	cg11833861	GGGGGAAAGTAAGGGAGAGAGAAAGAGACGGAGAAAAACAGGAAAACTTACTCTTCAGTA[CG]CAGGGAAGAATAGAGAAAGAAAAACACAAAGAAACGCCACGCAGACTGCAGAGAAGGACC	17	28279748	F	TMEM98;TMEM98	-5.21011	-0.0096023	0.739458	-0.332644	0.332649	1202	TMEM98	transmembrane protein 98	26022	chr17:31258368:31258417:+
207	cg11896923	TCGTCGGGGAGTGAAAGCAGGCGCAGGGAAATAAAAAGAAGGAAAGGGAGACAGACCAGG[CG]CCTAACAGATGGGGACCAAGAAACAAGAGATAGCTGAGAGGTGCAAACAGAAGAGAAAAA	17	35078553	F	PNMT	-1.37588	0.00560332	0.846124	0.194107	0.194108	1202	PNMT	phenylethanolamine N-methyltransferase	5409	chr17:37826360:37826409:+
208	cg11903057	GCCAGCCCAACTGTTGTATTTTCAGTTCTTCCAGTGTGAATCAGTTAATATTCTCGGGAA[CG]AGGGAGAGGTTGATCCTATGAGGAAATCAACCACAGTGAAAAGGCTTGGGCCGCTTTTGT	4	39875171	F	RHOH;RHOH	5.52534	-0.0486262	0.0919679	-1.68579	1.68646	1202	RHOH	ras homolog family member H	399	chr4:40245621:40245670:+
209	cg12145907	TGGCGGTGGGCTACCCTTTTGTTCCTCTTTTACCACCTGGGTTACGTTTGTGGGCAGATC[CG]CTACCCGGTCCCAGAGGAGTCACAGGAAGGGACTTTTGTAGGGAATGTCGCTCAAGATTT	5	140845018	R	PCDHGA4;PCDHGC3;PCDHGA12;PCDHGA11;PCDHGA11;PCDHGA9;PCDHGA1;PCDHGB1;PCDHGB6;PCDHGC4;PCDHGB3;PCDHGB7;PCDHGC4;PCDHGA6;PCDHGA8;PCDHGA10;PCDHGA5;PCDHGB4;PCDHGA3;PCDHGA2;PCDHGA7;PCDHGB2;PCDHGB5;PCDHGC3	2.22724	-0.0150888	0.601243	-0.522732	0.522752	1202	PCDHGC3	protocadherin gamma subfamily A, 1	5098	chr5:140711673:140711722:+
209	cg12145907	TGGCGGTGGGCTACCCTTTTGTTCCTCTTTTACCACCTGGGTTACGTTTGTGGGCAGATC[CG]CTACCCGGTCCCAGAGGAGTCACAGGAAGGGACTTTTGTAGGGAATGTCGCTCAAGATTT	5	140845018	R	PCDHGA4;PCDHGC3;PCDHGA12;PCDHGA11;PCDHGA11;PCDHGA9;PCDHGA1;PCDHGB1;PCDHGB6;PCDHGC4;PCDHGB3;PCDHGB7;PCDHGC4;PCDHGA6;PCDHGA8;PCDHGA10;PCDHGA5;PCDHGB4;PCDHGA3;PCDHGA2;PCDHGA7;PCDHGB2;PCDHGB5;PCDHGC3	2.22724	-0.00475065	0.869311	-0.164569	0.164569	1202	PCDHGC3	protocadherin gamma subfamily A, 1	5098	chr5:140712413:140712462:+
209	cg12145907	TGGCGGTGGGCTACCCTTTTGTTCCTCTTTTACCACCTGGGTTACGTTTGTGGGCAGATC[CG]CTACCCGGTCCCAGAGGAGTCACAGGAAGGGACTTTTGTAGGGAATGTCGCTCAAGATTT	5	140845018	R	PCDHGA4;PCDHGC3;PCDHGA12;PCDHGA11;PCDHGA11;PCDHGA9;PCDHGA1;PCDHGB1;PCDHGB6;PCDHGC4;PCDHGB3;PCDHGB7;PCDHGC4;PCDHGA6;PCDHGA8;PCDHGA10;PCDHGA5;PCDHGB4;PCDHGA3;PCDHGA2;PCDHGA7;PCDHGB2;PCDHGB5;PCDHGC3	2.22724	-0.0138721	0.630896	-0.480573	0.480589	1202	PCDHGC3	protocadherin gamma subfamily A, 1	5098	chr5:140712673:140712722:+
209	cg12145907	TGGCGGTGGGCTACCCTTTTGTTCCTCTTTTACCACCTGGGTTACGTTTGTGGGCAGATC[CG]CTACCCGGTCCCAGAGGAGTCACAGGAAGGGACTTTTGTAGGGAATGTCGCTCAAGATTT	5	140845018	R	PCDHGA4;PCDHGC3;PCDHGA12;PCDHGA11;PCDHGA11;PCDHGA9;PCDHGA1;PCDHGB1;PCDHGB6;PCDHGC4;PCDHGB3;PCDHGB7;PCDHGC4;PCDHGA6;PCDHGA8;PCDHGA10;PCDHGA5;PCDHGB4;PCDHGA3;PCDHGA2;PCDHGA7;PCDHGB2;PCDHGB5;PCDHGC3	2.22724	0.0146634	0.611539	0.507992	0.50801	1202	PCDHGC3	protocadherin gamma subfamily A, 10	5098	chr5:140794328:140794377:+
209	cg12145907	TGGCGGTGGGCTACCCTTTTGTTCCTCTTTTACCACCTGGGTTACGTTTGTGGGCAGATC[CG]CTACCCGGTCCCAGAGGAGTCACAGGAAGGGACTTTTGTAGGGAATGTCGCTCAAGATTT	5	140845018	R	PCDHGA4;PCDHGC3;PCDHGA12;PCDHGA11;PCDHGA11;PCDHGA9;PCDHGA1;PCDHGB1;PCDHGB6;PCDHGC4;PCDHGB3;PCDHGB7;PCDHGC4;PCDHGA6;PCDHGA8;PCDHGA10;PCDHGA5;PCDHGB4;PCDHGA3;PCDHGA2;PCDHGA7;PCDHGB2;PCDHGB5;PCDHGC3	2.22724	0.0186785	0.517656	0.647117	0.647155	1202	PCDHGC3	protocadherin gamma subfamily A, 10	5098	chr5:140795043:140795092:+
209	cg12145907	TGGCGGTGGGCTACCCTTTTGTTCCTCTTTTACCACCTGGGTTACGTTTGTGGGCAGATC[CG]CTACCCGGTCCCAGAGGAGTCACAGGAAGGGACTTTTGTAGGGAATGTCGCTCAAGATTT	5	140845018	R	PCDHGA4;PCDHGC3;PCDHGA12;PCDHGA11;PCDHGA11;PCDHGA9;PCDHGA1;PCDHGB1;PCDHGB6;PCDHGC4;PCDHGB3;PCDHGB7;PCDHGC4;PCDHGA6;PCDHGA8;PCDHGA10;PCDHGA5;PCDHGB4;PCDHGA3;PCDHGA2;PCDHGA7;PCDHGB2;PCDHGB5;PCDHGC3	2.22724	0.000512768	0.985831	0.0177628	0.0177628	1202	PCDHGC3	protocadherin gamma subfamily A, 11	5098	chr5:140803601:140803650:+
209	cg12145907	TGGCGGTGGGCTACCCTTTTGTTCCTCTTTTACCACCTGGGTTACGTTTGTGGGCAGATC[CG]CTACCCGGTCCCAGAGGAGTCACAGGAAGGGACTTTTGTAGGGAATGTCGCTCAAGATTT	5	140845018	R	PCDHGA4;PCDHGC3;PCDHGA12;PCDHGA11;PCDHGA11;PCDHGA9;PCDHGA1;PCDHGB1;PCDHGB6;PCDHGC4;PCDHGB3;PCDHGB7;PCDHGC4;PCDHGA6;PCDHGA8;PCDHGA10;PCDHGA5;PCDHGB4;PCDHGA3;PCDHGA2;PCDHGA7;PCDHGB2;PCDHGB5;PCDHGC3	2.22724	0.00993024	0.730899	0.344005	0.344011	1202	PCDHGC3	protocadherin gamma subfamily A, 11	5098	chr5:140802113:140802162:+
209	cg12145907	TGGCGGTGGGCTACCCTTTTGTTCCTCTTTTACCACCTGGGTTACGTTTGTGGGCAGATC[CG]CTACCCGGTCCCAGAGGAGTCACAGGAAGGGACTTTTGTAGGGAATGTCGCTCAAGATTT	5	140845018	R	PCDHGA4;PCDHGC3;PCDHGA12;PCDHGA11;PCDHGA11;PCDHGA9;PCDHGA1;PCDHGB1;PCDHGB6;PCDHGC4;PCDHGB3;PCDHGB7;PCDHGC4;PCDHGA6;PCDHGA8;PCDHGA10;PCDHGA5;PCDHGB4;PCDHGA3;PCDHGA2;PCDHGA7;PCDHGB2;PCDHGB5;PCDHGC3	2.22724	-0.0265465	0.357799	-0.919813	0.919921	1202	PCDHGC3	protocadherin gamma subfamily A, 12	5098	chr5:140812663:140812712:+
209	cg12145907	TGGCGGTGGGCTACCCTTTTGTTCCTCTTTTACCACCTGGGTTACGTTTGTGGGCAGATC[CG]CTACCCGGTCCCAGAGGAGTCACAGGAAGGGACTTTTGTAGGGAATGTCGCTCAAGATTT	5	140845018	R	PCDHGA4;PCDHGC3;PCDHGA12;PCDHGA11;PCDHGA11;PCDHGA9;PCDHGA1;PCDHGB1;PCDHGB6;PCDHGC4;PCDHGB3;PCDHGB7;PCDHGC4;PCDHGA6;PCDHGA8;PCDHGA10;PCDHGA5;PCDHGB4;PCDHGA3;PCDHGA2;PCDHGA7;PCDHGB2;PCDHGB5;PCDHGC3	2.22724	0.043531	0.131463	1.50891	1.50939	1202	PCDHGC3	protocadherin gamma subfamily A, 2	5098	chr5:140720127:140720176:+
209	cg12145907	TGGCGGTGGGCTACCCTTTTGTTCCTCTTTTACCACCTGGGTTACGTTTGTGGGCAGATC[CG]CTACCCGGTCCCAGAGGAGTCACAGGAAGGGACTTTTGTAGGGAATGTCGCTCAAGATTT	5	140845018	R	PCDHGA4;PCDHGC3;PCDHGA12;PCDHGA11;PCDHGA11;PCDHGA9;PCDHGA1;PCDHGB1;PCDHGB6;PCDHGC4;PCDHGB3;PCDHGB7;PCDHGC4;PCDHGA6;PCDHGA8;PCDHGA10;PCDHGA5;PCDHGB4;PCDHGA3;PCDHGA2;PCDHGA7;PCDHGB2;PCDHGB5;PCDHGC3	2.22724	-0.0129891	0.652797	-0.44998	0.449993	1202	PCDHGC3	protocadherin gamma subfamily A, 2	5098	chr5:140720712:140720761:+
209	cg12145907	TGGCGGTGGGCTACCCTTTTGTTCCTCTTTTACCACCTGGGTTACGTTTGTGGGCAGATC[CG]CTACCCGGTCCCAGAGGAGTCACAGGAAGGGACTTTTGTAGGGAATGTCGCTCAAGATTT	5	140845018	R	PCDHGA4;PCDHGC3;PCDHGA12;PCDHGA11;PCDHGA11;PCDHGA9;PCDHGA1;PCDHGB1;PCDHGB6;PCDHGC4;PCDHGB3;PCDHGB7;PCDHGC4;PCDHGA6;PCDHGA8;PCDHGA10;PCDHGA5;PCDHGB4;PCDHGA3;PCDHGA2;PCDHGA7;PCDHGB2;PCDHGB5;PCDHGC3	2.22724	0.00358952	0.901062	0.124345	0.124346	1202	PCDHGC3	protocadherin gamma subfamily A, 3	5098	chr5:140726038:140726087:+
209	cg12145907	TGGCGGTGGGCTACCCTTTTGTTCCTCTTTTACCACCTGGGTTACGTTTGTGGGCAGATC[CG]CTACCCGGTCCCAGAGGAGTCACAGGAAGGGACTTTTGTAGGGAATGTCGCTCAAGATTT	5	140845018	R	PCDHGA4;PCDHGC3;PCDHGA12;PCDHGA11;PCDHGA11;PCDHGA9;PCDHGA1;PCDHGB1;PCDHGB6;PCDHGC4;PCDHGB3;PCDHGB7;PCDHGC4;PCDHGA6;PCDHGA8;PCDHGA10;PCDHGA5;PCDHGB4;PCDHGA3;PCDHGA2;PCDHGA7;PCDHGB2;PCDHGB5;PCDHGC3	2.22724	0.0102625	0.722262	0.355514	0.35552	1202	PCDHGC3	protocadherin gamma subfamily A, 3	5098	chr5:140725172:140725221:+
209	cg12145907	TGGCGGTGGGCTACCCTTTTGTTCCTCTTTTACCACCTGGGTTACGTTTGTGGGCAGATC[CG]CTACCCGGTCCCAGAGGAGTCACAGGAAGGGACTTTTGTAGGGAATGTCGCTCAAGATTT	5	140845018	R	PCDHGA4;PCDHGC3;PCDHGA12;PCDHGA11;PCDHGA11;PCDHGA9;PCDHGA1;PCDHGB1;PCDHGB6;PCDHGC4;PCDHGB3;PCDHGB7;PCDHGC4;PCDHGA6;PCDHGA8;PCDHGA10;PCDHGA5;PCDHGB4;PCDHGA3;PCDHGA2;PCDHGA7;PCDHGB2;PCDHGB5;PCDHGC3	2.22724	0.0163885	0.570283	0.567765	0.567791	1202	PCDHGC3	protocadherin gamma subfamily A, 3	5098	chr5:140725922:140725971:+
209	cg12145907	TGGCGGTGGGCTACCCTTTTGTTCCTCTTTTACCACCTGGGTTACGTTTGTGGGCAGATC[CG]CTACCCGGTCCCAGAGGAGTCACAGGAAGGGACTTTTGTAGGGAATGTCGCTCAAGATTT	5	140845018	R	PCDHGA4;PCDHGC3;PCDHGA12;PCDHGA11;PCDHGA11;PCDHGA9;PCDHGA1;PCDHGB1;PCDHGB6;PCDHGC4;PCDHGB3;PCDHGB7;PCDHGC4;PCDHGA6;PCDHGA8;PCDHGA10;PCDHGA5;PCDHGB4;PCDHGA3;PCDHGA2;PCDHGA7;PCDHGB2;PCDHGB5;PCDHGC3	2.22724	0.00220438	0.939144	0.0763622	0.0763623	1202	PCDHGC3	protocadherin gamma subfamily A, 4	5098	chr5:140736874:140736923:+
209	cg12145907	TGGCGGTGGGCTACCCTTTTGTTCCTCTTTTACCACCTGGGTTACGTTTGTGGGCAGATC[CG]CTACCCGGTCCCAGAGGAGTCACAGGAAGGGACTTTTGTAGGGAATGTCGCTCAAGATTT	5	140845018	R	PCDHGA4;PCDHGC3;PCDHGA12;PCDHGA11;PCDHGA11;PCDHGA9;PCDHGA1;PCDHGB1;PCDHGB6;PCDHGC4;PCDHGB3;PCDHGB7;PCDHGC4;PCDHGA6;PCDHGA8;PCDHGA10;PCDHGA5;PCDHGB4;PCDHGA3;PCDHGA2;PCDHGA7;PCDHGB2;PCDHGB5;PCDHGC3	2.22724	0.027128	0.347361	0.939973	0.940088	1202	PCDHGC3	protocadherin gamma subfamily A, 4	5098	chr5:140737198:140737247:+
209	cg12145907	TGGCGGTGGGCTACCCTTTTGTTCCTCTTTTACCACCTGGGTTACGTTTGTGGGCAGATC[CG]CTACCCGGTCCCAGAGGAGTCACAGGAAGGGACTTTTGTAGGGAATGTCGCTCAAGATTT	5	140845018	R	PCDHGA4;PCDHGC3;PCDHGA12;PCDHGA11;PCDHGA11;PCDHGA9;PCDHGA1;PCDHGB1;PCDHGB6;PCDHGC4;PCDHGB3;PCDHGB7;PCDHGC4;PCDHGA6;PCDHGA8;PCDHGA10;PCDHGA5;PCDHGB4;PCDHGA3;PCDHGA2;PCDHGA7;PCDHGB2;PCDHGB5;PCDHGC3	2.22724	0.0992623	0.000568228	3.44991	3.45561	1202	PCDHGC3	protocadherin gamma subfamily A, 5	5098	chr5:140746198:140746247:+
209	cg12145907	TGGCGGTGGGCTACCCTTTTGTTCCTCTTTTACCACCTGGGTTACGTTTGTGGGCAGATC[CG]CTACCCGGTCCCAGAGGAGTCACAGGAAGGGACTTTTGTAGGGAATGTCGCTCAAGATTT	5	140845018	R	PCDHGA4;PCDHGC3;PCDHGA12;PCDHGA11;PCDHGA11;PCDHGA9;PCDHGA1;PCDHGB1;PCDHGB6;PCDHGC4;PCDHGB3;PCDHGB7;PCDHGC4;PCDHGA6;PCDHGA8;PCDHGA10;PCDHGA5;PCDHGB4;PCDHGA3;PCDHGA2;PCDHGA7;PCDHGB2;PCDHGB5;PCDHGC3	2.22724	-0.0033916	0.906492	-0.117489	0.117489	1202	PCDHGC3	NA	5098	chr5:140885021:140885048:+,chr5:140890514:140890535:+
209	cg12145907	TGGCGGTGGGCTACCCTTTTGTTCCTCTTTTACCACCTGGGTTACGTTTGTGGGCAGATC[CG]CTACCCGGTCCCAGAGGAGTCACAGGAAGGGACTTTTGTAGGGAATGTCGCTCAAGATTT	5	140845018	R	PCDHGA4;PCDHGC3;PCDHGA12;PCDHGA11;PCDHGA11;PCDHGA9;PCDHGA1;PCDHGB1;PCDHGB6;PCDHGC4;PCDHGB3;PCDHGB7;PCDHGC4;PCDHGA6;PCDHGA8;PCDHGA10;PCDHGA5;PCDHGB4;PCDHGA3;PCDHGA2;PCDHGA7;PCDHGB2;PCDHGB5;PCDHGC3	2.22724	-0.00361676	0.900316	-0.125289	0.125289	1202	PCDHGC3	NA	5098	chr5:140890606:140890655:+
209	cg12145907	TGGCGGTGGGCTACCCTTTTGTTCCTCTTTTACCACCTGGGTTACGTTTGTGGGCAGATC[CG]CTACCCGGTCCCAGAGGAGTCACAGGAAGGGACTTTTGTAGGGAATGTCGCTCAAGATTT	5	140845018	R	PCDHGA4;PCDHGC3;PCDHGA12;PCDHGA11;PCDHGA11;PCDHGA9;PCDHGA1;PCDHGB1;PCDHGB6;PCDHGC4;PCDHGB3;PCDHGB7;PCDHGC4;PCDHGA6;PCDHGA8;PCDHGA10;PCDHGA5;PCDHGB4;PCDHGA3;PCDHGA2;PCDHGA7;PCDHGB2;PCDHGB5;PCDHGC3	2.22724	-0.0346582	0.229865	-1.20108	1.20132	1202	PCDHGC3	protocadherin gamma subfamily A, 6	5098	chr5:140755080:140755129:+
209	cg12145907	TGGCGGTGGGCTACCCTTTTGTTCCTCTTTTACCACCTGGGTTACGTTTGTGGGCAGATC[CG]CTACCCGGTCCCAGAGGAGTCACAGGAAGGGACTTTTGTAGGGAATGTCGCTCAAGATTT	5	140845018	R	PCDHGA4;PCDHGC3;PCDHGA12;PCDHGA11;PCDHGA11;PCDHGA9;PCDHGA1;PCDHGB1;PCDHGB6;PCDHGC4;PCDHGB3;PCDHGB7;PCDHGC4;PCDHGA6;PCDHGA8;PCDHGA10;PCDHGA5;PCDHGB4;PCDHGA3;PCDHGA2;PCDHGA7;PCDHGB2;PCDHGB5;PCDHGC3	2.22724	0.0525246	0.0687005	1.82118	1.82202	1202	PCDHGC3	protocadherin gamma subfamily A, 7	5098	chr5:140764489:140764538:+
209	cg12145907	TGGCGGTGGGCTACCCTTTTGTTCCTCTTTTACCACCTGGGTTACGTTTGTGGGCAGATC[CG]CTACCCGGTCCCAGAGGAGTCACAGGAAGGGACTTTTGTAGGGAATGTCGCTCAAGATTT	5	140845018	R	PCDHGA4;PCDHGC3;PCDHGA12;PCDHGA11;PCDHGA11;PCDHGA9;PCDHGA1;PCDHGB1;PCDHGB6;PCDHGC4;PCDHGB3;PCDHGB7;PCDHGC4;PCDHGA6;PCDHGA8;PCDHGA10;PCDHGA5;PCDHGB4;PCDHGA3;PCDHGA2;PCDHGA7;PCDHGB2;PCDHGB5;PCDHGC3	2.22724	-0.00548772	0.849261	-0.190102	0.190103	1202	PCDHGC3	protocadherin gamma subfamily A, 7	5098	chr5:140765110:140765159:+
209	cg12145907	TGGCGGTGGGCTACCCTTTTGTTCCTCTTTTACCACCTGGGTTACGTTTGTGGGCAGATC[CG]CTACCCGGTCCCAGAGGAGTCACAGGAAGGGACTTTTGTAGGGAATGTCGCTCAAGATTT	5	140845018	R	PCDHGA4;PCDHGC3;PCDHGA12;PCDHGA11;PCDHGA11;PCDHGA9;PCDHGA1;PCDHGB1;PCDHGB6;PCDHGC4;PCDHGB3;PCDHGB7;PCDHGC4;PCDHGA6;PCDHGA8;PCDHGA10;PCDHGA5;PCDHGB4;PCDHGA3;PCDHGA2;PCDHGA7;PCDHGB2;PCDHGB5;PCDHGC3	2.22724	0.0180434	0.531995	0.62511	0.625144	1202	PCDHGC3	protocadherin gamma subfamily A, 8	5098	chr5:140774582:140774631:+
209	cg12145907	TGGCGGTGGGCTACCCTTTTGTTCCTCTTTTACCACCTGGGTTACGTTTGTGGGCAGATC[CG]CTACCCGGTCCCAGAGGAGTCACAGGAAGGGACTTTTGTAGGGAATGTCGCTCAAGATTT	5	140845018	R	PCDHGA4;PCDHGC3;PCDHGA12;PCDHGA11;PCDHGA11;PCDHGA9;PCDHGA1;PCDHGB1;PCDHGB6;PCDHGC4;PCDHGB3;PCDHGB7;PCDHGC4;PCDHGA6;PCDHGA8;PCDHGA10;PCDHGA5;PCDHGB4;PCDHGA3;PCDHGA2;PCDHGA7;PCDHGB2;PCDHGB5;PCDHGC3	2.22724	0.0352347	0.222203	1.22107	1.22133	1202	PCDHGC3	protocadherin gamma subfamily A, 9	5098	chr5:140784739:140784788:+
209	cg12145907	TGGCGGTGGGCTACCCTTTTGTTCCTCTTTTACCACCTGGGTTACGTTTGTGGGCAGATC[CG]CTACCCGGTCCCAGAGGAGTCACAGGAAGGGACTTTTGTAGGGAATGTCGCTCAAGATTT	5	140845018	R	PCDHGA4;PCDHGC3;PCDHGA12;PCDHGA11;PCDHGA11;PCDHGA9;PCDHGA1;PCDHGB1;PCDHGB6;PCDHGC4;PCDHGB3;PCDHGB7;PCDHGC4;PCDHGA6;PCDHGA8;PCDHGA10;PCDHGA5;PCDHGB4;PCDHGA3;PCDHGA2;PCDHGA7;PCDHGB2;PCDHGB5;PCDHGC3	2.22724	0.0315858	0.273862	1.09453	1.09471	1202	PCDHGC3	NA	5098	chr5:140890700:140890749:+
209	cg12145907	TGGCGGTGGGCTACCCTTTTGTTCCTCTTTTACCACCTGGGTTACGTTTGTGGGCAGATC[CG]CTACCCGGTCCCAGAGGAGTCACAGGAAGGGACTTTTGTAGGGAATGTCGCTCAAGATTT	5	140845018	R	PCDHGA4;PCDHGC3;PCDHGA12;PCDHGA11;PCDHGA11;PCDHGA9;PCDHGA1;PCDHGB1;PCDHGB6;PCDHGC4;PCDHGB3;PCDHGB7;PCDHGC4;PCDHGA6;PCDHGA8;PCDHGA10;PCDHGA5;PCDHGB4;PCDHGA3;PCDHGA2;PCDHGA7;PCDHGB2;PCDHGB5;PCDHGC3	2.22724	-0.0497329	0.084797	-1.72422	1.72493	1202	PCDHGC3	protocadherin gamma subfamily B, 1	5098	chr5:140732119:140732168:+
209	cg12145907	TGGCGGTGGGCTACCCTTTTGTTCCTCTTTTACCACCTGGGTTACGTTTGTGGGCAGATC[CG]CTACCCGGTCCCAGAGGAGTCACAGGAAGGGACTTTTGTAGGGAATGTCGCTCAAGATTT	5	140845018	R	PCDHGA4;PCDHGC3;PCDHGA12;PCDHGA11;PCDHGA11;PCDHGA9;PCDHGA1;PCDHGB1;PCDHGB6;PCDHGC4;PCDHGB3;PCDHGB7;PCDHGC4;PCDHGA6;PCDHGA8;PCDHGA10;PCDHGA5;PCDHGB4;PCDHGA3;PCDHGA2;PCDHGA7;PCDHGB2;PCDHGB5;PCDHGC3	2.22724	-0.0108641	0.706711	-0.376359	0.376367	1202	PCDHGC3	protocadherin gamma subfamily B, 2	5098	chr5:140741851:140741900:+
209	cg12145907	TGGCGGTGGGCTACCCTTTTGTTCCTCTTTTACCACCTGGGTTACGTTTGTGGGCAGATC[CG]CTACCCGGTCCCAGAGGAGTCACAGGAAGGGACTTTTGTAGGGAATGTCGCTCAAGATTT	5	140845018	R	PCDHGA4;PCDHGC3;PCDHGA12;PCDHGA11;PCDHGA11;PCDHGA9;PCDHGA1;PCDHGB1;PCDHGB6;PCDHGC4;PCDHGB3;PCDHGB7;PCDHGC4;PCDHGA6;PCDHGA8;PCDHGA10;PCDHGA5;PCDHGB4;PCDHGA3;PCDHGA2;PCDHGA7;PCDHGB2;PCDHGB5;PCDHGC3	2.22724	0.0479378	0.0966687	1.66189	1.66252	1202	PCDHGC3	protocadherin gamma subfamily B, 3	5098	chr5:140752120:140752169:+
209	cg12145907	TGGCGGTGGGCTACCCTTTTGTTCCTCTTTTACCACCTGGGTTACGTTTGTGGGCAGATC[CG]CTACCCGGTCCCAGAGGAGTCACAGGAAGGGACTTTTGTAGGGAATGTCGCTCAAGATTT	5	140845018	R	PCDHGA4;PCDHGC3;PCDHGA12;PCDHGA11;PCDHGA11;PCDHGA9;PCDHGA1;PCDHGB1;PCDHGB6;PCDHGC4;PCDHGB3;PCDHGB7;PCDHGC4;PCDHGA6;PCDHGA8;PCDHGA10;PCDHGA5;PCDHGB4;PCDHGA3;PCDHGA2;PCDHGA7;PCDHGB2;PCDHGB5;PCDHGC3	2.22724	-0.0107005	0.710929	-0.37069	0.370697	1202	PCDHGC3	protocadherin gamma subfamily B, 4	5098	chr5:140768491:140768540:+
209	cg12145907	TGGCGGTGGGCTACCCTTTTGTTCCTCTTTTACCACCTGGGTTACGTTTGTGGGCAGATC[CG]CTACCCGGTCCCAGAGGAGTCACAGGAAGGGACTTTTGTAGGGAATGTCGCTCAAGATTT	5	140845018	R	PCDHGA4;PCDHGC3;PCDHGA12;PCDHGA11;PCDHGA11;PCDHGA9;PCDHGA1;PCDHGB1;PCDHGB6;PCDHGC4;PCDHGB3;PCDHGB7;PCDHGC4;PCDHGA6;PCDHGA8;PCDHGA10;PCDHGA5;PCDHGB4;PCDHGA3;PCDHGA2;PCDHGA7;PCDHGB2;PCDHGB5;PCDHGC3	2.22724	0.00118045	0.967389	0.040892	0.040892	1202	PCDHGC3	protocadherin gamma subfamily B, 5	5098	chr5:140780039:140780088:+
209	cg12145907	TGGCGGTGGGCTACCCTTTTGTTCCTCTTTTACCACCTGGGTTACGTTTGTGGGCAGATC[CG]CTACCCGGTCCCAGAGGAGTCACAGGAAGGGACTTTTGTAGGGAATGTCGCTCAAGATTT	5	140845018	R	PCDHGA4;PCDHGC3;PCDHGA12;PCDHGA11;PCDHGA11;PCDHGA9;PCDHGA1;PCDHGB1;PCDHGB6;PCDHGC4;PCDHGB3;PCDHGB7;PCDHGC4;PCDHGA6;PCDHGA8;PCDHGA10;PCDHGA5;PCDHGB4;PCDHGA3;PCDHGA2;PCDHGA7;PCDHGB2;PCDHGB5;PCDHGC3	2.22724	-0.0380686	0.18719	-1.31937	1.31969	1202	PCDHGC3	NA	5098	chr5:140874392:140874432:+,chr5:140884960:140884968:+
209	cg12145907	TGGCGGTGGGCTACCCTTTTGTTCCTCTTTTACCACCTGGGTTACGTTTGTGGGCAGATC[CG]CTACCCGGTCCCAGAGGAGTCACAGGAAGGGACTTTTGTAGGGAATGTCGCTCAAGATTT	5	140845018	R	PCDHGA4;PCDHGC3;PCDHGA12;PCDHGA11;PCDHGA11;PCDHGA9;PCDHGA1;PCDHGB1;PCDHGB6;PCDHGC4;PCDHGB3;PCDHGB7;PCDHGC4;PCDHGA6;PCDHGA8;PCDHGA10;PCDHGA5;PCDHGB4;PCDHGA3;PCDHGA2;PCDHGA7;PCDHGB2;PCDHGB5;PCDHGC3	2.22724	0.00529485	0.854498	0.183421	0.183422	1202	PCDHGC3	protocadherin gamma subfamily B, 6	5098	chr5:140790106:140790155:+
209	cg12145907	TGGCGGTGGGCTACCCTTTTGTTCCTCTTTTACCACCTGGGTTACGTTTGTGGGCAGATC[CG]CTACCCGGTCCCAGAGGAGTCACAGGAAGGGACTTTTGTAGGGAATGTCGCTCAAGATTT	5	140845018	R	PCDHGA4;PCDHGC3;PCDHGA12;PCDHGA11;PCDHGA11;PCDHGA9;PCDHGA1;PCDHGB1;PCDHGB6;PCDHGC4;PCDHGB3;PCDHGB7;PCDHGC4;PCDHGA6;PCDHGA8;PCDHGA10;PCDHGA5;PCDHGB4;PCDHGA3;PCDHGA2;PCDHGA7;PCDHGB2;PCDHGB5;PCDHGC3	2.22724	0.0105768	0.714124	0.366403	0.36641	1202	PCDHGC3	protocadherin gamma subfamily B, 7	5098	chr5:140799566:140799615:+
209	cg12145907	TGGCGGTGGGCTACCCTTTTGTTCCTCTTTTACCACCTGGGTTACGTTTGTGGGCAGATC[CG]CTACCCGGTCCCAGAGGAGTCACAGGAAGGGACTTTTGTAGGGAATGTCGCTCAAGATTT	5	140845018	R	PCDHGA4;PCDHGC3;PCDHGA12;PCDHGA11;PCDHGA11;PCDHGA9;PCDHGA1;PCDHGB1;PCDHGB6;PCDHGC4;PCDHGB3;PCDHGB7;PCDHGC4;PCDHGA6;PCDHGA8;PCDHGA10;PCDHGA5;PCDHGB4;PCDHGA3;PCDHGA2;PCDHGA7;PCDHGB2;PCDHGB5;PCDHGC3	2.22724	0.0186224	0.518914	0.645173	0.645211	1202	PCDHGC3	protocadherin gamma subfamily B, 7	5098	chr5:140799854:140799903:+
209	cg12145907	TGGCGGTGGGCTACCCTTTTGTTCCTCTTTTACCACCTGGGTTACGTTTGTGGGCAGATC[CG]CTACCCGGTCCCAGAGGAGTCACAGGAAGGGACTTTTGTAGGGAATGTCGCTCAAGATTT	5	140845018	R	PCDHGA4;PCDHGC3;PCDHGA12;PCDHGA11;PCDHGA11;PCDHGA9;PCDHGA1;PCDHGB1;PCDHGB6;PCDHGC4;PCDHGB3;PCDHGB7;PCDHGC4;PCDHGA6;PCDHGA8;PCDHGA10;PCDHGA5;PCDHGB4;PCDHGA3;PCDHGA2;PCDHGA7;PCDHGB2;PCDHGB5;PCDHGC3	2.22724	0.024073	0.404361	0.834073	0.834153	1202	PCDHGC3	protocadherin gamma subfamily C, 3	5098	chr5:140855630:140855679:+
209	cg12145907	TGGCGGTGGGCTACCCTTTTGTTCCTCTTTTACCACCTGGGTTACGTTTGTGGGCAGATC[CG]CTACCCGGTCCCAGAGGAGTCACAGGAAGGGACTTTTGTAGGGAATGTCGCTCAAGATTT	5	140845018	R	PCDHGA4;PCDHGC3;PCDHGA12;PCDHGA11;PCDHGA11;PCDHGA9;PCDHGA1;PCDHGB1;PCDHGB6;PCDHGC4;PCDHGB3;PCDHGB7;PCDHGC4;PCDHGA6;PCDHGA8;PCDHGA10;PCDHGA5;PCDHGB4;PCDHGA3;PCDHGA2;PCDHGA7;PCDHGB2;PCDHGB5;PCDHGC3	2.22724	0.012775	0.658153	0.442562	0.442574	1202	PCDHGC3	protocadherin gamma subfamily C, 3	5098	chr5:140855657:140855706:+
209	cg12145907	TGGCGGTGGGCTACCCTTTTGTTCCTCTTTTACCACCTGGGTTACGTTTGTGGGCAGATC[CG]CTACCCGGTCCCAGAGGAGTCACAGGAAGGGACTTTTGTAGGGAATGTCGCTCAAGATTT	5	140845018	R	PCDHGA4;PCDHGC3;PCDHGA12;PCDHGA11;PCDHGA11;PCDHGA9;PCDHGA1;PCDHGB1;PCDHGB6;PCDHGC4;PCDHGB3;PCDHGB7;PCDHGC4;PCDHGA6;PCDHGA8;PCDHGA10;PCDHGA5;PCDHGB4;PCDHGA3;PCDHGA2;PCDHGA7;PCDHGB2;PCDHGB5;PCDHGC3	2.22724	-0.011737	0.684367	-0.4066	0.40661	1202	PCDHGC3	protocadherin gamma subfamily C, 3	5098	chr5:140858282:140858331:+
209	cg12145907	TGGCGGTGGGCTACCCTTTTGTTCCTCTTTTACCACCTGGGTTACGTTTGTGGGCAGATC[CG]CTACCCGGTCCCAGAGGAGTCACAGGAAGGGACTTTTGTAGGGAATGTCGCTCAAGATTT	5	140845018	R	PCDHGA4;PCDHGC3;PCDHGA12;PCDHGA11;PCDHGA11;PCDHGA9;PCDHGA1;PCDHGB1;PCDHGB6;PCDHGC4;PCDHGB3;PCDHGB7;PCDHGC4;PCDHGA6;PCDHGA8;PCDHGA10;PCDHGA5;PCDHGB4;PCDHGA3;PCDHGA2;PCDHGA7;PCDHGB2;PCDHGB5;PCDHGC3	2.22724	0.0362908	0.208644	1.2577	1.25798	1202	PCDHGC3	protocadherin gamma subfamily C, 4	5098	chr5:140867132:140867181:+
209	cg12145907	TGGCGGTGGGCTACCCTTTTGTTCCTCTTTTACCACCTGGGTTACGTTTGTGGGCAGATC[CG]CTACCCGGTCCCAGAGGAGTCACAGGAAGGGACTTTTGTAGGGAATGTCGCTCAAGATTT	5	140845018	R	PCDHGA4;PCDHGC3;PCDHGA12;PCDHGA11;PCDHGA11;PCDHGA9;PCDHGA1;PCDHGB1;PCDHGB6;PCDHGC4;PCDHGB3;PCDHGB7;PCDHGC4;PCDHGA6;PCDHGA8;PCDHGA10;PCDHGA5;PCDHGB4;PCDHGA3;PCDHGA2;PCDHGA7;PCDHGB2;PCDHGB5;PCDHGC3	2.22724	0.021616	0.454019	0.748916	0.748975	1202	PCDHGC3	protocadherin gamma subfamily C, 4	5098	chr5:140867244:140867293:+
209	cg12145907	TGGCGGTGGGCTACCCTTTTGTTCCTCTTTTACCACCTGGGTTACGTTTGTGGGCAGATC[CG]CTACCCGGTCCCAGAGGAGTCACAGGAAGGGACTTTTGTAGGGAATGTCGCTCAAGATTT	5	140845018	R	PCDHGA4;PCDHGC3;PCDHGA12;PCDHGA11;PCDHGA11;PCDHGA9;PCDHGA1;PCDHGB1;PCDHGB6;PCDHGC4;PCDHGB3;PCDHGB7;PCDHGC4;PCDHGA6;PCDHGA8;PCDHGA10;PCDHGA5;PCDHGB4;PCDHGA3;PCDHGA2;PCDHGA7;PCDHGB2;PCDHGB5;PCDHGC3	2.22724	-0.012319	0.669618	-0.426766	0.426777	1202	PCDHGC3	protocadherin gamma subfamily C, 5	5098	chr5:140871161:140871210:+
209	cg12145907	TGGCGGTGGGCTACCCTTTTGTTCCTCTTTTACCACCTGGGTTACGTTTGTGGGCAGATC[CG]CTACCCGGTCCCAGAGGAGTCACAGGAAGGGACTTTTGTAGGGAATGTCGCTCAAGATTT	5	140845018	R	PCDHGA4;PCDHGC3;PCDHGA12;PCDHGA11;PCDHGA11;PCDHGA9;PCDHGA1;PCDHGB1;PCDHGB6;PCDHGC4;PCDHGB3;PCDHGB7;PCDHGC4;PCDHGA6;PCDHGA8;PCDHGA10;PCDHGA5;PCDHGB4;PCDHGA3;PCDHGA2;PCDHGA7;PCDHGB2;PCDHGB5;PCDHGC3	2.22724	0.00601778	0.834901	0.208464	0.208466	1202	PCDHGC3	protocadherin gamma subfamily C, 5	5098	chr5:140871370:140871419:+
210	cg12177001	CCTTGCTGGCTCTGTCTGCTGAGGTTTTACCCAAGTGACTCCATTTTGAATCTTACAACT[CG]CACACTACTCATGTGGAAGATTTAAATGTACATTCCAGGACCTGGTGCTTTCTCTTCCGC	14	93645901	R	IFI27;IFI27	2.33685	0.000705324	0.980511	0.0244331	0.0244331	1202	IFI27	interferon alpha inducible protein 27	3429	chr14:94582803:94582852:+
211	cg12188560	GTGGCCACAGAATCCCCTTCCTACAACTGGCAGGGGTCGGCATGGGCTGGAGCTCAGAGA[CG]GCCAGCTAGGACTTCAGGACACACAGCAAACTAGCTGCGCCCCGCTGAGGGTCAGCGCAC	9	34581192	F	CNTFR;CNTFR	-1.54655	-0.0176175	0.541724	-0.610351	0.610382	1202	CNTFR	ciliary neurotrophic factor receptor	1271	chr9:34581143:34581192:-
211	cg12188560	GTGGCCACAGAATCCCCTTCCTACAACTGGCAGGGGTCGGCATGGGCTGGAGCTCAGAGA[CG]GCCAGCTAGGACTTCAGGACACACAGCAAACTAGCTGCGCCCCGCTGAGGGTCAGCGCAC	9	34581192	F	CNTFR;CNTFR	-1.54655	0.0124668	0.665893	0.431887	0.431898	1202	CNTFR	ciliary neurotrophic factor receptor	1271	chr9:34551534:34551583:-
211	cg12188560	GTGGCCACAGAATCCCCTTCCTACAACTGGCAGGGGTCGGCATGGGCTGGAGCTCAGAGA[CG]GCCAGCTAGGACTTCAGGACACACAGCAAACTAGCTGCGCCCCGCTGAGGGTCAGCGCAC	9	34581192	F	CNTFR;CNTFR	-1.54655	0.0283681	0.325759	0.982963	0.983095	1202	CNTFR	ciliary neurotrophic factor receptor	1271	chr9:34552159:34552166:-,chr9:34552028:34552069:-
212	cg12238343	CTGACCTCCAGGAAGCTGAGCGTGGTGGATGGAACTCTACGATCTCTTTCTCTCCAAGGA[CG]GAAACCTCATCCAAGCAGTCCCAGAGGAAACGGATAAAGGTATTTGAAAGGGAGCGAGCG	5	33972159	F	RXFP3	5.74976	-0.014332	0.619614	-0.496509	0.496526	1202	RXFP3	relaxin/insulin like family peptide receptor 3	51289	chr5:33938064:33938113:+
213	cg12247247	GCCCTGGCAGTGCTCTCGCGGTGGCCTGGCTCTCTCTCTCCGGCCTGAAGGAGAGCAAAG[CG]CCCCAGCTGCCTAGGGCCACCGCTCCTGACGAATCCGCCAGCCACTGCACGACAGATGGT	17	34263387	F	SNORA21;RPL23	-20.7534	-0.0268273	0.352735	-0.929548	0.929659	1202	RPL23	ribosomal protein L23	9349	chr6:39926483:39926532:-
213	cg12247247	GCCCTGGCAGTGCTCTCGCGGTGGCCTGGCTCTCTCTCTCCGGCCTGAAGGAGAGCAAAG[CG]CCCCAGCTGCCTAGGGCCACCGCTCCTGACGAATCCGCCAGCCACTGCACGACAGATGGT	17	34263387	F	SNORA21;RPL23	-20.7534	-0.00127264	0.964844	-0.0440855	0.0440855	1202	RPL23	ribosomal protein L23	9349	chr17:37006675:37006724:-
213	cg12247247	GCCCTGGCAGTGCTCTCGCGGTGGCCTGGCTCTCTCTCTCCGGCCTGAAGGAGAGCAAAG[CG]CCCCAGCTGCCTAGGGCCACCGCTCCTGACGAATCCGCCAGCCACTGCACGACAGATGGT	17	34263387	F	SNORA21;RPL23	-20.7534	0.0286886	0.320321	0.994074	0.99421	1202	SNORA21	small nucleolar RNA, H/ACA box 21	619505	chr17:37009154:37009203:-
214	cg12261786	TATCAACAAAAATACCCACTTCAGGAGGTGGTTGTAAAGATTATACAAGAGACTGCAGAG[CG]TTAGGCAGCACCTGGCACAAGACAAATGCTCAGTAAAAGACCACTGCTGTCATTAAGGTC	10	88717810	F	C10orf116	-8.80006	0.00198071	0.945308	0.0686138	0.0686139	1202	C10orf116	adipogenesis regulatory factor	10974	chr10:88730439:88730488:+
215	cg12265604	CTGTCACAATTGTTAACACCTTCTTTGACCAGCCTTTTTACATTTGACAATTCTCTTCAG[CG]CCTCTTTCCTGCCAGCAGGAAGGTTTTGCTGCCTTGGCTTTCGGGAGCCCCCTAGACAGC	16	67697069	R	HAS3	12.6784	0.025922	0.369224	0.898165	0.898266	1202	HAS3	hyaluronan synthase 3	3038	chr16:69152378:69152427:+
215	cg12265604	CTGTCACAATTGTTAACACCTTCTTTGACCAGCCTTTTTACATTTGACAATTCTCTTCAG[CG]CCTCTTTCCTGCCAGCAGGAAGGTTTTGCTGCCTTGGCTTTCGGGAGCCCCCTAGACAGC	16	67697069	R	HAS3	12.6784	-0.0355741	0.217779	-1.23284	1.2331	1202	HAS3	hyaluronan synthase 3	3038	chr16:69143899:69143934:+,chr16:69147344:69147357:+
215	cg12265604	CTGTCACAATTGTTAACACCTTCTTTGACCAGCCTTTTTACATTTGACAATTCTCTTCAG[CG]CCTCTTTCCTGCCAGCAGGAAGGTTTTGCTGCCTTGGCTTTCGGGAGCCCCCTAGACAGC	16	67697069	R	HAS3	12.6784	-0.0281867	0.328862	-0.976676	0.976805	1202	HAS3	hyaluronan synthase 3	3038	chr16:69151322:69151371:+
216	cg12269343	CACGACTCACGGACATGGCCCCAGCTAATTGGTAGCCCCTGGGTTCAACCGGAATCAGCG[CG]TGAGTCCAAGACTGGGAGAAAGAGGCTCATCCGAGACTACAATTCCCAGAATGCGCTTCA	14	81070186	F	SEL1L	10.4581	0.0215692	0.454998	0.747294	0.747352	1202	SEL1L	NA	6400	chr14:81938161:81938210:-
217	cg12289045	GTAAACAAGCAAACAAAAACACATACACAAACCGGTCACTGTCAGACTGTCTGTGAGAAG[CG]CTCCACAGGACACAGCTGGAGAATGTGTCACAAAGGAACTCAGAGGGGGGCGGTCAGGGA	19	55833173	R	SYT3;SYT3;SYT3	0.20538	-0.0452003	0.117288	-1.56685	1.56738	1202	SYT3	synaptotagmin 3	84258	chr19:51125503:51125552:-
218	cg12324144	CAAGAACCTGGACACCTTCTACCGGTAACAATGGGGGTGTGGCTTGCTTCTTTGGTGCTC[CG]CTGCTCAAACCTCTAGGGGGAGCATGCAGACGGGCAGGTTGTGGGGCACGTGGGCTCCGA	3	171014357	R	LRRC34	0.2996	-0.043403	0.132602	-1.50447	1.50494	1202	LRRC34	leucine rich repeat containing 34	151827	chr3:169514002:169514004:-,chr3:169513353:169513399:-
219	cg12373771	TGGCGATCCAGGAGCACCAGTACAGGTCGGTGACGGCGATGAGGTACAGGTCCAGCAGGC[CG]CCCTGCGCCAGCAGCAGCACCACGGACAGCGCCTGGTAGCCCCAGCGGCACCTGGGACTG	22	15981381	R	CECR6;CECR6	0.0105268	-0.133875	3.19962e-06	-4.66556	4.67968	1202	CECR6	cat eye syndrome chromosome region, candidate 6	27439	chr22:17597412:17597461:-
220	cg12402251	GGAGGGATAATGGGATCAGGAGGCTCAGAAAAGGGCAAAGAATGGGAAGGGGCATGGAAA[CG]GGTCTTGAAACAGTTAAAAAGAGAAGATAATCACCGTCAGCGTCGAAATGGAGCCAGATC	8	91163987	F	CALB1	1.50954	0.0396614	0.169391	1.37463	1.37499	1202	CALB1	calbindin 1	793	chr8:91071118:91071167:-
221	cg12473775	GCCTAACCCGGCCTCCGAGGGGTGTCCCAGCGGGGCCTGGGGTCCAGGGCAGAGTTCTTC[CG]CCCCAGCCATTGGGAATGAAGGCCTCAGTGATGTTATCTGTAAAGCCGGAGGAATGGCAT	11	66581226	R	RHOD	-3.99474	0.0161938	0.574872	0.56102	0.561045	1202	RHOD	ras homolog family member D	29984	chr11:66839254:66839303:+
222	cg12743894	GAGGGGGATTTCCAGCTGCTGGCCGGGGCCTCTCACCCCTACCCCCGCGTAGTTCATCTG[CG]ACGCAACGCCTTGTGTCAAAGCCCAGCACAGGTTCTGCCGCCTCTGACCTCTCTGAGGGT	11	30301513	F	C11orf46	36.7882	-0.0495445	0.0859848	-1.71768	1.71838	1202	C11orf46	ADP ribosylation factor like GTPase 14 effector protein	120534	chr11:30358846:30358895:+
223	cg12813792	GGTGACGGTTACAGGCGAGTCCTCTCTTTGACATACTCAATTAAGCTCTGTACACTTGAG[CG]TCTGTCCACTCGTAGGTGTGCATACTTCCACTGCGGATTTAAACTTTCAAAGAAGTCTAG	20	56159101	R	C20orf85	1.18205	-0.0288022	0.318407	-0.998013	0.998151	1202	C20orf85	chromosome 20 open reading frame 85	128602	chr20:56735870:56735919:+
224	cg12864235	ACTCAGACAGGCAGGAAGCTGAAGGCAAAGGAACTCTCTATCTGATTGGTTTCCATTCAG[CG]TTTCTGATTAATAAGAGACGTCCCTCAAATAGGAAGATATTGCCGCTGATGGCGCTGCAG	5	27074539	F	CDH9	0.655305	0.0733823	0.0109296	2.54662	2.54891	1202	CDH9	cadherin 9	1007	chr5:26881579:26881628:-
225	cg12985418	ATTCACATTTAGTTCGCCTAGGAAAACTAGCAGTTAGTGAAAAACTGGCCACATCACAGC[CG]CACAGCTCCAGCAGCCCGGGTAGCTTCCCCACCCTCACTTTCTCCAGCCCCGCCTCCAGG	18	17574536	R	MIB1	-35.9001	-0.00529244	0.854564	-0.183337	0.183338	1202	MIB1	mindbomb E3 ubiquitin protein ligase 1	57534	chr18:19450305:19450354:+
226	cg12991365	GGCATGCCTGCACCCTCAGGGCAGCCCCGGACATCGGCGTCAGGTTGCTTGAGTCAGGGG[CG]TGGGAATCAGACAGACCCGGTCTCAGATGCCACCCTGTACTGTTGGTTCTGTCATTTATG	3	53855893	F	CHDH;IL17RB	-0.399519	0.0408053	0.157411	1.41432	1.41472	1202	CHDH	choline dehydrogenase	55349	chr3:53851763:53851812:-
226	cg12991365	GGCATGCCTGCACCCTCAGGGCAGCCCCGGACATCGGCGTCAGGTTGCTTGAGTCAGGGG[CG]TGGGAATCAGACAGACCCGGTCTCAGATGCCACCCTGTACTGTTGGTTCTGTCATTTATG	3	53855893	F	CHDH;IL17RB	-0.399519	0.0206856	0.473684	0.716672	0.716724	1202	CHDH	choline dehydrogenase	55349	chr3:53850636:53850685:-
226	cg12991365	GGCATGCCTGCACCCTCAGGGCAGCCCCGGACATCGGCGTCAGGTTGCTTGAGTCAGGGG[CG]TGGGAATCAGACAGACCCGGTCTCAGATGCCACCCTGTACTGTTGGTTCTGTCATTTATG	3	53855893	F	CHDH;IL17RB	-0.399519	0.0138452	0.631558	0.479642	0.479658	1202	IL17RB	interleukin 17 receptor B	55540	chr3:53899322:53899371:+
227	cg13042288	GACTGGGCAAAAATTAACCAGGGCTCCAACAGGCGAAGGTCACTGGACTGGGCAGGGGCA[CG]CTCCGCCTGGGGAGAGGAGATCCAGGAACGGTGTGTGGAGCTGGGCTCGGGGGGTGCCTG	15	88150983	R	ANPEP	-8.16079	0.0389942	0.176685	1.35148	1.35183	1202	ANPEP	alanyl aminopeptidase, membrane	290	chr15:90328406:90328455:-
229	cg13120519	GACTCAGCCACTGGTGTAAGTCAGGCGGGAGGTGGCGCCCAATAAGCTCAAGAGAGGAGG[CG]GGTTCTGGAAAAAGGCCAATAGCCTGTGAAGGCGAGTCTAGCAGCAACCAATAGCTATGA	19	6323660	F	ALKBH7;ALKBH7	-8.76164	-0.0888067	0.00205751	-3.08448	3.08856	1202	ALKBH7	alkB homolog 7	84266	chr19:6374377:6374387:+,chr19:6374476:6374514:+
230	cg13218906	GGTGGCCGTCCGCGTGGCAGGGCGGGGGTCCCAGGGCGGCTGTGCTTGGTGCTGGGAGGC[CG]CCCGAGGGCAGCGCCGGCCCCGAGTCAGCAGCCGCAGGGCACCCTGGAGATGCGGAACGC	20	62357195	R	PCMTD2;PCMTD2	-13.6813	0.00430443	0.881491	0.149111	0.149111	1202	PCMTD2	protein-L-isoaspartate (D-aspartate) O-methyltransferase domain containing 2	55251	chr20:62906348:62906397:+
231	cg13258700	AGACCCTACGTAGGATTGCATCTTTACGTCGTAGGCTTGGTCTCGTGTATTTTTATTGAG[CG]TGTTTAATTAGCTGAGGTTACTCGCTTTGGCACCCCAGTGATCGTTTTTGCCACCAAGCT	7	156126758	F	C7orf13;RNF32	1.93542	-0.110619	0.000121565	-3.84769	3.85561	1202	C7orf13	chromosome 7 open reading frame 13	129790	chr7:156431432:156431481:-
231	cg13258700	AGACCCTACGTAGGATTGCATCTTTACGTCGTAGGCTTGGTCTCGTGTATTTTTATTGAG[CG]TGTTTAATTAGCTGAGGTTACTCGCTTTGGCACCCCAGTGATCGTTTTTGCCACCAAGCT	7	156126758	F	C7orf13;RNF32	1.93542	-0.0110823	0.7011	-0.38392	0.383927	1202	RNF32	ring finger protein 32	140545	chr7:156469686:156469735:+
231	cg13258700	AGACCCTACGTAGGATTGCATCTTTACGTCGTAGGCTTGGTCTCGTGTATTTTTATTGAG[CG]TGTTTAATTAGCTGAGGTTACTCGCTTTGGCACCCCAGTGATCGTTTTTGCCACCAAGCT	7	156126758	F	C7orf13;RNF32	1.93542	-0.0378183	0.190108	-1.31069	1.311	1202	RNF32	ring finger protein 32	140545	chr7:156469220:156469269:+
232	cg13296371	CTCTCCCAGCCGTTTCCCAGCGTGTCATGTGCTGAGAAATGGTGGGCTTAGCCACGCAAA[CG]TTTACTGAGCATCTACTATTTGGTAGGAGCTGTTAGGCACCATGCTAGCAGTGGAGATAA	4	4301647	F	TMEM128	4.45707	-0.0279191	0.333478	-0.967397	0.967523	1202	TMEM128	transmembrane protein 128	85013	chr4:4237584:4237633:-
232	cg13296371	CTCTCCCAGCCGTTTCCCAGCGTGTCATGTGCTGAGAAATGGTGGGCTTAGCCACGCAAA[CG]TTTACTGAGCATCTACTATTTGGTAGGAGCTGTTAGGCACCATGCTAGCAGTGGAGATAA	4	4301647	F	TMEM128	4.45707	-0.0320871	0.266316	-1.11191	1.1121	1202	TMEM128	transmembrane protein 128	85013	chr4:4237854:4237903:-
233	cg13307384	GGGGACCAGTTTCCCCTCCTGGGATATTTGGTGTGCGACATGCCCTTCCCCCAGCCCCAG[CG]CCCGTTCCCTTTGGAAGCCTGGGTGCTCCTCAGACCACTTGGGGACTCCCTGCTTCACCT	12	48304054	F	PRPF40B;PRPF40B	2.58356	0.0606475	0.0355193	2.10347	2.10476	1202	PRPF40B	pre-mRNA processing factor 40 homolog B	25766	chr12:50037761:50037787:+,chr12:50037883:50037905:+
233	cg13307384	GGGGACCAGTTTCCCCTCCTGGGATATTTGGTGTGCGACATGCCCTTCCCCCAGCCCCAG[CG]CCCGTTCCCTTTGGAAGCCTGGGTGCTCCTCAGACCACTTGGGGACTCCCTGCTTCACCT	12	48304054	F	PRPF40B;PRPF40B	2.58356	-0.000473851	0.986906	-0.0164147	0.0164147	1202	PRPF40B	pre-mRNA processing factor 40 homolog B	25766	chr12:50017730:50017779:+
234	cg13323474	CTGTCTTACCTGCAGCAGCCTCAGTTATGTTTTTGACAACTATAGCAACCAACTACCTCT[CG]CGAGAACTTACTTTTGGCCATCGCACGAGCAAGTTTATTCCAAGACTCGCGATAACCCTC	10	74788529	R	TTC18	3.55224	-0.0379805	0.188213	-1.31632	1.31663	1202	TTC18	cilia and flagella associated protein 70	118491	chr10:75032686:75032688:-,chr10:75029427:75029473:-
235	cg13351161	CAAAGTCACTCAGCTCGCCAGGGGCAGAGCCAGGGTGCTCACAGGGTGGCCAACCTTCCA[CG]TCTGCCCTGGACACGGGACTTTCAGTACTAAAATGTGCGGACGTCCTTCTCCCGGACGTC	8	27546840	F	SCARA3;SCARA3	-3.96075	-0.0429061	0.137098	-1.48722	1.48768	1202	SCARA3	scavenger receptor class A member 3	51435	chr8:27516988:27517037:+
235	cg13351161	CAAAGTCACTCAGCTCGCCAGGGGCAGAGCCAGGGTGCTCACAGGGTGGCCAACCTTCCA[CG]TCTGCCCTGGACACGGGACTTTCAGTACTAAAATGTGCGGACGTCCTTCTCCCGGACGTC	8	27546840	F	SCARA3;SCARA3	-3.96075	-0.0104998	0.716114	-0.363737	0.363743	1202	SCARA3	scavenger receptor class A member 3	51435	chr8:27534195:27534244:+
235	cg13351161	CAAAGTCACTCAGCTCGCCAGGGGCAGAGCCAGGGTGCTCACAGGGTGGCCAACCTTCCA[CG]TCTGCCCTGGACACGGGACTTTCAGTACTAAAATGTGCGGACGTCCTTCTCCCGGACGTC	8	27546840	F	SCARA3;SCARA3	-3.96075	-0.0345537	0.231274	-1.19745	1.19769	1202	SCARA3	scavenger receptor class A member 3	51435	chr8:27530318:27530367:+
236	cg13409216	TTTTCCCGGGCAGCTTACCTGCTCGGCCTGGGTCTTTCTGGACAGCAGGCGCTGGAGGTG[CG]CGTCACTGTCCGCCGCCGTGTCCGCGGCTGCGCCAGACAGTGTAGAACCTGCGGCCTCGA	10	70609993	R	SUPV3L1	-14.4861	-0.0176426	0.541149	-0.61122	0.611252	1202	SUPV3L1	Suv3 like RNA helicase	6832	chr10:70968601:70968650:+
237	cg13449372	AGAGGCTAAATGCCAGGGGGATGGAGTGAGCTACGAGGAAACCACTATTCCCCGACCCAG[CG]CCTACCACAATCTGTTTGGATTACCACTGATTAGTCGTCGAGATGCTGAGGTGGTACTGA	10	102738683	F	C10orf2;MRPL43;MRPL43;MRPL43;C10orf2;C10orf2;C10orf2;MRPL43	-14.1205	0.00218436	0.939695	0.0756685	0.0756686	1202	C10orf2	chromosome 10 open reading frame 2	56652	chr10:102753884:102753933:+
237	cg13449372	AGAGGCTAAATGCCAGGGGGATGGAGTGAGCTACGAGGAAACCACTATTCCCCGACCCAG[CG]CCTACCACAATCTGTTTGGATTACCACTGATTAGTCGTCGAGATGCTGAGGTGGTACTGA	10	102738683	F	C10orf2;MRPL43;MRPL43;MRPL43;C10orf2;C10orf2;C10orf2;MRPL43	-14.1205	0.00175287	0.951591	0.0607213	0.0607213	1202	MRPL43	mitochondrial ribosomal protein L43	84545	chr10:102746306:102746355:-
237	cg13449372	AGAGGCTAAATGCCAGGGGGATGGAGTGAGCTACGAGGAAACCACTATTCCCCGACCCAG[CG]CCTACCACAATCTGTTTGGATTACCACTGATTAGTCGTCGAGATGCTGAGGTGGTACTGA	10	102738683	F	C10orf2;MRPL43;MRPL43;MRPL43;C10orf2;C10orf2;C10orf2;MRPL43	-14.1205	0.0317034	0.27208	1.09861	1.09879	1202	MRPL43	mitochondrial ribosomal protein L43	84545	chr10:102737594:102737643:-
237	cg13449372	AGAGGCTAAATGCCAGGGGGATGGAGTGAGCTACGAGGAAACCACTATTCCCCGACCCAG[CG]CCTACCACAATCTGTTTGGATTACCACTGATTAGTCGTCGAGATGCTGAGGTGGTACTGA	10	102738683	F	C10orf2;MRPL43;MRPL43;MRPL43;C10orf2;C10orf2;C10orf2;MRPL43	-14.1205	0.0234134	0.417362	0.811213	0.811287	1202	MRPL43	mitochondrial ribosomal protein L43	84545	chr10:102746847:102746852:-,chr10:102746689:102746732:-
237	cg13449372	AGAGGCTAAATGCCAGGGGGATGGAGTGAGCTACGAGGAAACCACTATTCCCCGACCCAG[CG]CCTACCACAATCTGTTTGGATTACCACTGATTAGTCGTCGAGATGCTGAGGTGGTACTGA	10	102738683	F	C10orf2;MRPL43;MRPL43;MRPL43;C10orf2;C10orf2;C10orf2;MRPL43	-14.1205	0.00837778	0.771694	0.290222	0.290225	1202	MRPL43	mitochondrial ribosomal protein L43	84545	chr10:102743720:102743769:-
238	cg13460409	ATCTCTCACCTTGCTACTTTCTCGGTAGCCGTTTCTGTTGTCCCTGGATTGGGGGCTCGG[CG]TTCGCTGTCCCTGGGCACCAACCCTTTTAAAGACAGTAACGTTGTAGGAAATCAAATTAG	21	37301440	R	DSCR6	0.148824	-0.00818145	0.776901	-0.28342	0.283423	1202	DSCR6	ripply transcriptional repressor 3	53820	chr21:38391683:38391732:+
239	cg13509147	CTGTCTCTCCACCCTGTCCACCAATCAGCACCTGGAGGTGGGCTGGGAGCTGCCTGTGAC[CG]CTTCAGCATCTTTTGGGAGTGGTGACAGAGCCACAGAGGGCTGTGAGCTTGCCCGGCCCC	19	4104603	R	CREB3L3	14.2213	0.0569956	0.0482023	1.97653	1.9776	1202	CREB3L3	cAMP responsive element binding protein 3 like 3	84699	chr19:4172969:4173018:+
240	cg13510262	CGGTCCGGGTTCGCTTGCCTCGTCAGCGTCCGCGTTTTTCCCGGCCCCCCCCAACCCCCC[CG]GACAGGACCCCCTTGAGCTTGTCCCTCAGCTGCCACCATGAGCGGTAAGGATGAGTCCAC	12	52060304	F	SP1;SP1;SP1	1.14673	0.000634583	0.982465	0.0219826	0.0219826	1202	SP1	Sp1 transcription factor	6667	chr12:53810004:53810053:+
241	cg13514050	CGGGCAGCCGCGGGAAGCTGGTGATGCTCATGTAGTCCACTGGCGAGTAGGCGCCCAGGG[CG]CTCTCCTGGCTGGCCTCGTTCTCCGCCGCCATCCTCGCCCGCGCCCCCCAGCAGCGCAGC	20	32924246	R	GGT7	-13.341	-0.0294609	0.307461	-1.02085	1.021	1202	GGT7	gamma-glutamyltransferase 7	2686	chr20:33449286:33449335:-
241	cg13514050	CGGGCAGCCGCGGGAAGCTGGTGATGCTCATGTAGTCCACTGGCGAGTAGGCGCCCAGGG[CG]CTCTCCTGGCTGGCCTCGTTCTCCGCCGCCATCCTCGCCCGCGCCCCCCAGCAGCGCAGC	20	32924246	R	GGT7	-13.341	0.00704288	0.807289	0.243977	0.243979	1202	GGT7	NA	2686	chr20:33448791:33448840:-
241	cg13514050	CGGGCAGCCGCGGGAAGCTGGTGATGCTCATGTAGTCCACTGGCGAGTAGGCGCCCAGGG[CG]CTCTCCTGGCTGGCCTCGTTCTCCGCCGCCATCCTCGCCCGCGCCCCCCAGCAGCGCAGC	20	32924246	R	GGT7	-13.341	0.0306821	0.287832	1.06319	1.06336	1202	GGT7	NA	2686	chr20:33438623:33438672:-
242	cg13550877	CCAGATTACAGTCTCTAAGTCTTAAAGAGGCCAGCCCCACTTAGAGGTTTTCCTGAGCTG[CG]TATCAGGACATGAGTTCCTTCCACTATTTCTAGGAGTACTACACTAGAGCAGTATGAGAC	14	76959735	R	C14orf148;C14orf148	-16.7903	-0.0169099	0.55808	-0.585831	0.585859	1202	C14orf148	NADP dependent oxidoreductase domain containing 1	122945	chr14:77873892:77873941:-
243	cg13564075	TAGGGACTGTTCATCCATTGGTGTTTGTGTGCAAACTAAGACGACTCTGTTCTGCGCAGG[CG]TGTTGGGGGTGCTCCCCCTTCCTCTCCATAACACAGACGCCTCCCGCGCAGGCGTATTGC	17	24302936	R	PHF12;PHF12	-7.65215	-0.00653274	0.821002	-0.226304	0.226306	1202	PHF12	PHD finger protein 12	57649	chr17:27239500:27239549:-
243	cg13564075	TAGGGACTGTTCATCCATTGGTGTTTGTGTGCAAACTAAGACGACTCTGTTCTGCGCAGG[CG]TGTTGGGGGTGCTCCCCCTTCCTCTCCATAACACAGACGCCTCCCGCGCAGGCGTATTGC	17	24302936	R	PHF12;PHF12	-7.65215	0.0570804	0.0478694	1.97948	1.98055	1202	PHF12	PHD finger protein 12	57649	chr17:27239200:27239249:-
243	cg13564075	TAGGGACTGTTCATCCATTGGTGTTTGTGTGCAAACTAAGACGACTCTGTTCTGCGCAGG[CG]TGTTGGGGGTGCTCCCCCTTCCTCTCCATAACACAGACGCCTCCCGCGCAGGCGTATTGC	17	24302936	R	PHF12;PHF12	-7.65215	0.0532442	0.0649857	1.84618	1.84705	1202	PHF12	PHD finger protein 12	57649	chr17:27232647:27232696:-
244	cg13571802	ATTTCCATATATCCTTTATCCAGATTCCCTAAATTATTACTGCATTTGCTTTATCCTTCT[CG]ATCAGTGGACAGATAGATGATATAGACAGATAGATAGACAAATATATATTTTTTGAACTC	3	44891477	R	TGM4	-2.12316	-0.0108781	0.706352	-0.376842	0.37685	1202	TGM4	transglutaminase 4	7047	chr3:44955612:44955661:+
245	cg13587552	ACCTGCCTGGGTGCAGGACCCCAGAGGGACCCCAGGCCACCCCTGGCCTGCCCATGCCCA[CG]GGAATCCCGACCTTGGGCTGCCTGTCTATTGCACCAGAACCGTCCCAGGGCTGACTCAGA	1	1206304	F	SCNN1D;SCNN1D	-0.0969605	0.0188583	0.513631	0.653349	0.653388	1202	SCNN1D	sodium channel epithelial 1 delta subunit	6339	chr1:1227350:1227399:+
246	cg13613532	GACAAAGTGCAGGGGATATAGACCAACCGCTTGTGAAGGCTGCTGGTTCTGTTAGAAGCC[CG]CTTTCGATTGTCAGTGGCTTTGAGGCAAAGGATTTTGGAAGGGAAAGCAAAGTGATTGTC	11	107843607	R	C11orf65	0.210205	-0.00366163	0.899086	-0.126843	0.126843	1202	C11orf65	chromosome 11 open reading frame 65	160140	chr11:108276156:108276170:-,chr11:108264071:108264105:-
246	cg13613532	GACAAAGTGCAGGGGATATAGACCAACCGCTTGTGAAGGCTGCTGGTTCTGTTAGAAGCC[CG]CTTTCGATTGTCAGTGGCTTTGAGGCAAAGGATTTTGGAAGGGAAAGCAAAGTGATTGTC	11	107843607	R	C11orf65	0.210205	0.0236999	0.411685	0.821141	0.821218	1202	C11orf65	NA	160140	chr11:108225773:108225822:-
247	cg13631913	GGACGTTGGACGTCAGCAAGGCCTGGGTGGTGCTGGTGAACGGTGATGCTTGCGGCCACA[CG]CGGGGTGGCTAAGCCAGGGACCCGAACTCATATGAGGTCTGGAAGGTGTGTTGAGACACT	1	9522932	R	SLC25A33	23.8381	-0.0674266	0.0193925	-2.33927	2.34105	1202	SLC25A33	solute carrier family 25 member 33	84275	chr1:9627344:9627393:+
247	cg13631913	GGACGTTGGACGTCAGCAAGGCCTGGGTGGTGCTGGTGAACGGTGATGCTTGCGGCCACA[CG]CGGGGTGGCTAAGCCAGGGACCCGAACTCATATGAGGTCTGGAAGGTGTGTTGAGACACT	1	9522932	R	SLC25A33	23.8381	0.0142099	0.622601	0.492278	0.492295	1202	SLC25A33	solute carrier family 25 member 33	84275	chr11:49456137:49456181:-
247	cg13631913	GGACGTTGGACGTCAGCAAGGCCTGGGTGGTGCTGGTGAACGGTGATGCTTGCGGCCACA[CG]CGGGGTGGCTAAGCCAGGGACCCGAACTCATATGAGGTCTGGAAGGTGTGTTGAGACACT	1	9522932	R	SLC25A33	23.8381	-0.0167508	0.56179	-0.580319	0.580346	1202	SLC25A33	solute carrier family 25 member 33	84275	chr1:9642642:9642691:+
248	cg13654195	AGGCGGTGAGGGGCTTCCGGTTGGGGTGGCAGGGTGGTGGATCTGTCGGTCCCGTTTTCC[CG]TCGCACGTGGTGGCCACTGTTGGCTTCTGAATGGTTTGCAAGGCGGATATCCACGCCAAG	6	7335090	R	CAGE1;CAGE1;RIOK1;RIOK1;CAGE1	-0.76467	0.0346721	0.229678	1.20156	1.2018	1202	CAGE1	cancer antigen 1	285782	chr6:7366068:7366117:-
248	cg13654195	AGGCGGTGAGGGGCTTCCGGTTGGGGTGGCAGGGTGGTGGATCTGTCGGTCCCGTTTTCC[CG]TCGCACGTGGTGGCCACTGTTGGCTTCTGAATGGTTTGCAAGGCGGATATCCACGCCAAG	6	7335090	R	CAGE1;CAGE1;RIOK1;RIOK1;CAGE1	-0.76467	0.0586109	0.0421876	2.03267	2.03384	1202	CAGE1	cancer antigen 1	285782	chr6:7389744:7389793:-
248	cg13654195	AGGCGGTGAGGGGCTTCCGGTTGGGGTGGCAGGGTGGTGGATCTGTCGGTCCCGTTTTCC[CG]TCGCACGTGGTGGCCACTGTTGGCTTCTGAATGGTTTGCAAGGCGGATATCCACGCCAAG	6	7335090	R	CAGE1;CAGE1;RIOK1;RIOK1;CAGE1	-0.76467	-0.0212981	0.460687	-0.737898	0.737954	1202	RIOK1	RIO kinase 1	83732	chr6:7418126:7418175:+
248	cg13654195	AGGCGGTGAGGGGCTTCCGGTTGGGGTGGCAGGGTGGTGGATCTGTCGGTCCCGTTTTCC[CG]TCGCACGTGGTGGCCACTGTTGGCTTCTGAATGGTTTGCAAGGCGGATATCCACGCCAAG	6	7335090	R	CAGE1;CAGE1;RIOK1;RIOK1;CAGE1	-0.76467	-0.0210724	0.465452	-0.730078	0.730132	1202	RIOK1	RIO kinase 1	83732	chr6:7402953:7403002:+
248	cg13654195	AGGCGGTGAGGGGCTTCCGGTTGGGGTGGCAGGGTGGTGGATCTGTCGGTCCCGTTTTCC[CG]TCGCACGTGGTGGCCACTGTTGGCTTCTGAATGGTTTGCAAGGCGGATATCCACGCCAAG	6	7335090	R	CAGE1;CAGE1;RIOK1;RIOK1;CAGE1	-0.76467	-0.00458039	0.873955	-0.15867	0.158671	1202	RIOK1	RIO kinase 1	83732	chr6:7393518:7393536:+,chr6:7395286:7395316:+
249	cg13656062	AGTCCAGAAAGGCCCAGCCTGAATCACTGTGAGGTTGCCAGGGGCTTGGTTTCAGTTACT[CG]GAAACCACCCATCCTCCAGGCCAGCACCCAGGAGCTGCGTGGGCCTTGGGCAGTGCCCCT	19	15869723	R	CYP4F2	2.48428	0.0471409	0.102348	1.63422	1.63482	1202	CYP4F2	cytochrome P450 family 4 subfamily F member 2	8529	chr19:15990603:15990652:-
249	cg13656062	AGTCCAGAAAGGCCCAGCCTGAATCACTGTGAGGTTGCCAGGGGCTTGGTTTCAGTTACT[CG]GAAACCACCCATCCTCCAGGCCAGCACCCAGGAGCTGCGTGGGCCTTGGGCAGTGCCCCT	19	15869723	R	CYP4F2	2.48428	0.0398755	0.167098	1.38206	1.38243	1202	CYP4F2	cytochrome P450 family 4 subfamily F member 2	8529	chr19:15989024:15989073:-
250	cg13656360	CCCATCCGGGATTGAGGAGCATCCCAATTCTGGGACCATCTCGGGGTCCCTGACCCGGGG[CG]AATGGCTCTCCCATCTTGGGACCCCCATGCAGGGCTGCAGACCCCCAGGCGCCCCCACCC	11	117812992	F	MLL	14.3641	-0.0102884	0.72159	-0.356412	0.356418	1202	MLL	NA	4297	chr11:118309520:118309569:+
250	cg13656360	CCCATCCGGGATTGAGGAGCATCCCAATTCTGGGACCATCTCGGGGTCCCTGACCCGGGG[CG]AATGGCTCTCCCATCTTGGGACCCCCATGCAGGGCTGCAGACCCCCAGGCGCCCCCACCC	11	117812992	F	MLL	14.3641	-0.0320238	0.267262	-1.10972	1.10991	1202	MLL	NA	NA	chr11:118431322:118431371:+
250	cg13656360	CCCATCCGGGATTGAGGAGCATCCCAATTCTGGGACCATCTCGGGGTCCCTGACCCGGGG[CG]AATGGCTCTCCCATCTTGGGACCCCCATGCAGGGCTGCAGACCCCCAGGCGCCCCCACCC	11	117812992	F	MLL	14.3641	0.0297724	0.302372	1.03165	1.0318	1202	MLL	lysine methyltransferase 2A	4297	chr11:118395572:118395621:+
251	cg13700897	GAGCGAATCCTCTTCGGGCTTTCCAGAGTGCGGGGGATAGATAAAGAGTAGCTGGGGAGA[CG]CCCCCTGACCTTGCTGGGTCCCAGAACCCGGCTGCTCACCCCCAAGGGGTCCTCTCCAGC	8	109165240	F	RSPO2	-5.20321	0.0235285	0.415076	0.815201	0.815276	1202	RSPO2	R-spondin 2	340419	chr8:108912022:108912071:-
251	cg13700897	GAGCGAATCCTCTTCGGGCTTTCCAGAGTGCGGGGGATAGATAAAGAGTAGCTGGGGAGA[CG]CCCCCTGACCTTGCTGGGTCCCAGAACCCGGCTGCTCACCCCCAAGGGGTCCTCTCCAGC	8	109165240	F	RSPO2	-5.20321	0.0362857	0.208708	1.25753	1.2578	1202	RSPO2	R-spondin 2	340419	chr8:108911608:108911657:-
252	cg13718960	GCCACTACAGCACTGGTGCCCAAACCTGGCACACTAGGAACAAAGTCCTTGTTACTTCTT[CG]TGGGCGTTTTCACCAAGTAGACTTGGAGGTTAACAAAGGACGCAAAGGAGAGGTTCTAAT	14	20341153	R	RNASE1;RNASE1;RNASE1;RNASE1	3.46868	-0.101221	0.000440241	-3.51846	3.52451	1202	RNASE1	ribonuclease A family member 1, pancreatic	6035	chr14:21269712:21269761:-
252	cg13718960	GCCACTACAGCACTGGTGCCCAAACCTGGCACACTAGGAACAAAGTCCTTGTTACTTCTT[CG]TGGGCGTTTTCACCAAGTAGACTTGGAGGTTAACAAAGGACGCAAAGGAGAGGTTCTAAT	14	20341153	R	RNASE1;RNASE1;RNASE1;RNASE1	3.46868	-0.123317	1.80841e-05	-4.29369	4.30469	1202	RNASE1	ribonuclease A family member 1, pancreatic	6035	chr14:21269963:21270012:-
253	cg13843773	TTTTCACAGGAGTGAGGCAGAAGACAGAAACTGCAACAAACCGCCGGGGGGTGGGATTAA[CG]TCCAAAGCTCACACCGGCTTCAACTGATTGGCAGGAACGAAGTGGGTGGAGCCTCCTGAC	4	81475835	F	C4orf22	0.0435856	-0.0206902	0.473585	-0.716833	0.716885	1202	C4orf22	chromosome 4 open reading frame 22	255119	chr4:81866081:81866093:+,chr4:81884671:81884707:+
254	cg13854874	AATAATAAATAATAATGAATCCATTCTTCCTTCGGTCGTGGGTCTGGCAGGCATAAATTC[CG]GCCGGGATTCCGACCCCAGGGCCAGAGCAGGACTCGCCTTGGCGTCTATGAGTGGGCGGG	21	36679395	R	CHAF1B	2.70554	-0.0430434	0.135844	-1.49199	1.49245	1202	CHAF1B	chromatin assembly factor 1 subunit B	8208	chr21:37788946:37788995:+
255	cg13861644	CTTGGGGGGCCAGGGGCAGGGCCTGTGGGGCGGGGCGGGCCTGGCTTGTTGGGCCTGTGC[CG]GGTGTCCGGGAGGGGCCAGACGGGGTCTTGGAGGGGCGGGGCCGGGGCCTGTGGGGCGGG	12	129388239	R	PIWIL1	0.588384	0.00605821	0.833808	0.209865	0.209866	1202	PIWIL1	piwi like RNA-mediated gene silencing 1	9271	chr12:130856556:130856605:+
332	cg17861230	GCGGACTTGTCCGGATCCGAATAGAAGCGCTGTTGGATGCGGATGGGGCGCCGGGGTTGC[CG]CCACAGGTGCTTCGGGGCTCTGGTCATGCTGTGGCGGCCGCGAGAGCGACTCAACCTGCT	19	18204901	R	PDE4C	0.0237383	0.0211657	0.463479	0.733311	0.733366	1202	PDE4C	phosphodiesterase 4C	5143	chr19:18321436:18321485:-
332	cg17861230	GCGGACTTGTCCGGATCCGAATAGAAGCGCTGTTGGATGCGGATGGGGCGCCGGGGTTGC[CG]CCACAGGTGCTTCGGGGCTCTGGTCATGCTGTGGCGGCCGCGAGAGCGACTCAACCTGCT	19	18204901	R	PDE4C	0.0237383	0.0413242	0.152194	1.43233	1.43274	1202	PDE4C	phosphodiesterase 4C	5143	chr19:18320853:18320902:-
257	cg13975369	CCATTTGAGGGCAAGGGCTGTGTCTTTGGGTACTTCGCTCCTCGCAGTCACAAGTACTGG[CG]TGCGTACGCGGGGAGAGATCGCTCCTCAAAACGGGGTCCTGAACGCTGCCCCGCGGCCCC	7	129867789	R	TSGA14	3.58307	-0.0968257	0.000775649	-3.36468	3.36997	1202	TSGA14	centrosomal protein 41	95681	chr7:130036898:130036947:-
257	cg13975369	CCATTTGAGGGCAAGGGCTGTGTCTTTGGGTACTTCGCTCCTCGCAGTCACAAGTACTGG[CG]TGCGTACGCGGGGAGAGATCGCTCCTCAAAACGGGGTCCTGAACGCTGCCCCGCGGCCCC	7	129867789	R	TSGA14	3.58307	-0.102186	0.000387617	-3.55222	3.55845	1202	TSGA14	centrosomal protein 41	95681	chr7:130036726:130036775:-
258	cg13994175	GGACGGCGCGGAGGAGCTGGAGGATCTGGTGCACTTCTCCGTGTCTGAGTTGCCTAGTCG[CG]GCTACGGCGTCATGGAGGAGATCCGGCGGCAGGGCAAGCTGTGCGACGTGACCCTCAAGG	3	47299528	R	KIF9;KIF9;KIF9;KLHL18	12.0788	-0.00546713	0.849819	-0.189389	0.18939	1202	KIF9	kinesin family member 9	64147	chr3:47286307:47286356:-
258	cg13994175	GGACGGCGCGGAGGAGCTGGAGGATCTGGTGCACTTCTCCGTGTCTGAGTTGCCTAGTCG[CG]GCTACGGCGTCATGGAGGAGATCCGGCGGCAGGGCAAGCTGTGCGACGTGACCCTCAAGG	3	47299528	R	KIF9;KIF9;KIF9;KLHL18	12.0788	-0.00804274	0.780586	-0.278615	0.278618	1202	KIF9	kinesin family member 9	64147	chr3:47282341:47282390:-
258	cg13994175	GGACGGCGCGGAGGAGCTGGAGGATCTGGTGCACTTCTCCGTGTCTGAGTTGCCTAGTCG[CG]GCTACGGCGTCATGGAGGAGATCCGGCGGCAGGGCAAGCTGTGCGACGTGACCCTCAAGG	3	47299528	R	KIF9;KIF9;KIF9;KLHL18	12.0788	-0.000627408	0.982664	-0.0217341	0.0217341	1202	KLHL18	kelch like family member 18	23276	chr3:47387997:47388046:+
259	cg14009688	CATGCCTAGGGAATGACAGGCATCTCCACAGGCAGGCTGCATCCACCTTGGCTGGGGTGT[CG]TCATTGGCTGCCTATTAGAAAAACGACAGGACAATGCATACCACCGCCTCCCGACTGTAA	7	134114782	R	CALD1;CALD1;CALD1;CALD1;CALD1;CALD1	1.04171	0.0142536	0.621532	0.493792	0.493809	1202	CALD1	caldesmon 1	800	chr7:134654944:134654993:+
259	cg14009688	CATGCCTAGGGAATGACAGGCATCTCCACAGGCAGGCTGCATCCACCTTGGCTGGGGTGT[CG]TCATTGGCTGCCTATTAGAAAAACGACAGGACAATGCATACCACCGCCTCCCGACTGTAA	7	134114782	R	CALD1;CALD1;CALD1;CALD1;CALD1;CALD1	1.04171	-0.00687322	0.811843	-0.238099	0.238101	1202	CALD1	caldesmon 1	800	chr7:134650082:134650131:+
259	cg14009688	CATGCCTAGGGAATGACAGGCATCTCCACAGGCAGGCTGCATCCACCTTGGCTGGGGTGT[CG]TCATTGGCTGCCTATTAGAAAAACGACAGGACAATGCATACCACCGCCTCCCGACTGTAA	7	134114782	R	CALD1;CALD1;CALD1;CALD1;CALD1;CALD1	1.04171	-0.0182413	0.527506	-0.631967	0.632002	1202	CALD1	caldesmon 1	800	chr7:134618292:134618341:+
260	cg14105047	CAACTGCTTGCCAATTTAAATTTCTGGAGAGAAAAATGCACCCACTACAAAACGGACGAG[CG]GAGGGTTAGACCTTTGCCAGGTAGCGCTCAAAATCCGCTAAGACTACTCCCACCGAAACT	4	95591833	F	PDLIM5;PDLIM5;PDLIM5;PDLIM5;PDLIM5	0.137366	-0.0724642	0.0119704	-2.51464	2.51685	1202	PDLIM5	PDZ and LIM domain 5	10611	chr4:95445016:95445026:+,chr4:95494502:95494540:+
260	cg14105047	CAACTGCTTGCCAATTTAAATTTCTGGAGAGAAAAATGCACCCACTACAAAACGGACGAG[CG]GAGGGTTAGACCTTTGCCAGGTAGCGCTCAAAATCCGCTAAGACTACTCCCACCGAAACT	4	95591833	F	PDLIM5;PDLIM5;PDLIM5;PDLIM5;PDLIM5	0.137366	-0.035334	0.220902	-1.22451	1.22477	1202	PDLIM5	PDZ and LIM domain 5	10611	chr4:95496970:95497019:+
260	cg14105047	CAACTGCTTGCCAATTTAAATTTCTGGAGAGAAAAATGCACCCACTACAAAACGGACGAG[CG]GAGGGTTAGACCTTTGCCAGGTAGCGCTCAAAATCCGCTAAGACTACTCCCACCGAAACT	4	95591833	F	PDLIM5;PDLIM5;PDLIM5;PDLIM5;PDLIM5	0.137366	0.0140975	0.625356	0.488383	0.4884	1202	PDLIM5	PDZ and LIM domain 5	10611	chr4:95506828:95506877:+
261	cg14159818	GCTGATCTCCAGTCTGCACACTGTTGGCAAATTAATCTTTCTGAGCTCTTGTTTTCATCG[CG]TCCCTCTCCTGCTCCAAAGCCCTCTGGGACTGCCTCCAGTAGCGCTTCACAAACTTCAGC	20	3697519	R	C20orf27	-12.1811	-0.0856556	0.00295825	-2.97449	2.97814	1202	C20orf27	chromosome 20 open reading frame 27	54976	chr20:3734209:3734258:-
261	cg14159818	GCTGATCTCCAGTCTGCACACTGTTGGCAAATTAATCTTTCTGAGCTCTTGTTTTCATCG[CG]TCCCTCTCCTGCTCCAAAGCCCTCTGGGACTGCCTCCAGTAGCGCTTCACAAACTTCAGC	20	3697519	R	C20orf27	-12.1811	-0.0384281	0.183057	-1.33184	1.33217	1202	C20orf27	NA	54976	chr20:3734415:3734458:-
262	cg14175438	CGCACAAAATCCCAGCCTCAAGGGCAGAACATTTTAAATGACCCACCCATCCTAGAGATG[CG]CCAGTTAGGTCATCTTATATATCTTGAGATAGCTGAGATGGTCAGATCAACCAAGGACCT	7	120823965	F	FAM3C;FAM3C	-14.9518	-0.0615973	0.0327302	-2.1365	2.13785	1202	FAM3C	family with sequence similarity 3 member C	10447	chr7:120989762:120989811:-
262	cg14175438	CGCACAAAATCCCAGCCTCAAGGGCAGAACATTTTAAATGACCCACCCATCCTAGAGATG[CG]CCAGTTAGGTCATCTTATATATCTTGAGATAGCTGAGATGGTCAGATCAACCAAGGACCT	7	120823965	F	FAM3C;FAM3C	-14.9518	-0.0127663	0.65837	-0.442263	0.442275	1202	FAM3C	family with sequence similarity 3 member C	10447	chr7:120989764:120989813:-
263	cg14223995	TACCCCTCTGCCTAGCTACCTGGAGCCGGACTTTGGCCGTGTCCAGCGGGAAGGTGATCA[CG]TCCGCCAAGCACGCCGCTATTCCAGCTGAGAAGAGCTGGACCCCCAGGGTCGGGTGTACG	4	141709249	R	UCP1	-6.40966	0.0360068	0.21223	1.24785	1.24812	1202	UCP1	uncoupling protein 1	7350	chr4:141484264:141484264:-,chr4:141483479:141483527:-
265	cg14350002	AGCCCGGCTGCAGACTCGTTAGCAGCGAGGCTTTAAATACAAAAGTGGGCCGGGAGCCCC[CG]CGTGGTGCCGCGGTGCCCCCTCATTATGCATGCATGGAAAAGCAAACAAACAAAAACATT	9	88752293	R	GAS1	-4.23381	-0.0148033	0.608144	-0.51284	0.512859	1202	GAS1	growth arrest specific 1	2619	chr9:89559740:89559789:-
265	cg14350002	AGCCCGGCTGCAGACTCGTTAGCAGCGAGGCTTTAAATACAAAAGTGGGCCGGGAGCCCC[CG]CGTGGTGCCGCGGTGCCCCCTCATTATGCATGCATGGAAAAGCAAACAAACAAAAACATT	9	88752293	R	GAS1	-4.23381	-0.0213451	0.459696	-0.739529	0.739585	1202	GAS1	growth arrest specific 1	2619	chr9:89559526:89559575:-
266	cg14423778	GTCAGTGTTCTTTTAGTTTGCTTAAACTGTGTGGGTACTTGAGTCCTTTTAAACGATTAA[CG]CTGGGAAGAGGCACCATTTAATTAATTAATTTGTTCTGGAAGGGATCAGTGTACAATTTT	3	153468123	F	MBNL1;MBNL1;LOC401093;LOC401093	-4.79561	-0.0333123	0.248478	-1.1544	1.15461	1202	LOC401093	MBNL1 antisense RNA 1	401093	chr3:151980869:151980918:-
266	cg14423778	GTCAGTGTTCTTTTAGTTTGCTTAAACTGTGTGGGTACTTGAGTCCTTTTAAACGATTAA[CG]CTGGGAAGAGGCACCATTTAATTAATTAATTTGTTCTGGAAGGGATCAGTGTACAATTTT	3	153468123	F	MBNL1;MBNL1;LOC401093;LOC401093	-4.79561	0.026928	0.350929	0.933039	0.933152	1202	LOC401093	MBNL1 antisense RNA 1	401093	chr3:151983635:151983684:-
266	cg14423778	GTCAGTGTTCTTTTAGTTTGCTTAAACTGTGTGGGTACTTGAGTCCTTTTAAACGATTAA[CG]CTGGGAAGAGGCACCATTTAATTAATTAATTTGTTCTGGAAGGGATCAGTGTACAATTTT	3	153468123	F	MBNL1;MBNL1;LOC401093;LOC401093	-4.79561	0.104822	0.000272208	3.64452	3.65124	1202	MBNL1	muscleblind like splicing regulator 1	4154	chr3:152182542:152182591:+
266	cg14423778	GTCAGTGTTCTTTTAGTTTGCTTAAACTGTGTGGGTACTTGAGTCCTTTTAAACGATTAA[CG]CTGGGAAGAGGCACCATTTAATTAATTAATTTGTTCTGGAAGGGATCAGTGTACAATTTT	3	153468123	F	MBNL1;MBNL1;LOC401093;LOC401093	-4.79561	0.0705109	0.0144811	2.44663	2.44866	1202	MBNL1	muscleblind like splicing regulator 1	4154	chr3:152183310:152183359:+
266	cg14423778	GTCAGTGTTCTTTTAGTTTGCTTAAACTGTGTGGGTACTTGAGTCCTTTTAAACGATTAA[CG]CTGGGAAGAGGCACCATTTAATTAATTAATTTGTTCTGGAAGGGATCAGTGTACAATTTT	3	153468123	F	MBNL1;MBNL1;LOC401093;LOC401093	-4.79561	0.0316316	0.273168	1.09612	1.0963	1202	MBNL1	muscleblind like splicing regulator 1	4154	chr3:152164495:152164544:+
267	cg14467840	CCACATTTGCAACCTTGGCCATCTGTCCAGAACCTGCTCCCACCTCAGGCCCAGGCCAAC[CG]TGAGTACCCTGCCCCACTGGGCTAGTCCCTGGCCTGCCAGCTTCAGGGAGAGGGGTCTTC	1	151867596	F	S100A13;S100A1;S100A13;S100A13;S100A13;S100A13	0.116178	-0.0339516	0.23951	-1.17657	1.1768	1202	S100A13	NA	NA	chr1:153591957:153592006:-
267	cg14467840	CCACATTTGCAACCTTGGCCATCTGTCCAGAACCTGCTCCCACCTCAGGCCCAGGCCAAC[CG]TGAGTACCCTGCCCCACTGGGCTAGTCCCTGGCCTGCCAGCTTCAGGGAGAGGGGTCTTC	1	151867596	F	S100A13;S100A1;S100A13;S100A13;S100A13;S100A13	0.116178	-0.0036606	0.899114	-0.126807	0.126808	1202	S100A1	S100 calcium binding protein A1	6271	chr1:153604369:153604418:+
267	cg14467840	CCACATTTGCAACCTTGGCCATCTGTCCAGAACCTGCTCCCACCTCAGGCCCAGGCCAAC[CG]TGAGTACCCTGCCCCACTGGGCTAGTCCCTGGCCTGCCAGCTTCAGGGAGAGGGGTCTTC	1	151867596	F	S100A13;S100A1;S100A13;S100A13;S100A13;S100A13	0.116178	-0.0581014	0.0440122	-2.01496	2.0161	1202	S100A13	S100 calcium binding protein A13	6284	chr1:153599444:153599493:-
267	cg14467840	CCACATTTGCAACCTTGGCCATCTGTCCAGAACCTGCTCCCACCTCAGGCCCAGGCCAAC[CG]TGAGTACCCTGCCCCACTGGGCTAGTCCCTGGCCTGCCAGCTTCAGGGAGAGGGGTCTTC	1	151867596	F	S100A13;S100A1;S100A13;S100A13;S100A13;S100A13	0.116178	0.0298556	0.301023	1.03453	1.03469	1202	S100A13	S100 calcium binding protein A13	6284	chr1:153599618:153599667:-
267	cg14467840	CCACATTTGCAACCTTGGCCATCTGTCCAGAACCTGCTCCCACCTCAGGCCCAGGCCAAC[CG]TGAGTACCCTGCCCCACTGGGCTAGTCCCTGGCCTGCCAGCTTCAGGGAGAGGGGTCTTC	1	151867596	F	S100A13;S100A1;S100A13;S100A13;S100A13;S100A13	0.116178	-0.151555	1.29578e-07	-5.29077	5.31136	1202	S100A13	S100 calcium binding protein A13	6284	chr1:153598801:153598850:-
267	cg14467840	CCACATTTGCAACCTTGGCCATCTGTCCAGAACCTGCTCCCACCTCAGGCCCAGGCCAAC[CG]TGAGTACCCTGCCCCACTGGGCTAGTCCCTGGCCTGCCAGCTTCAGGGAGAGGGGTCTTC	1	151867596	F	S100A13;S100A1;S100A13;S100A13;S100A13;S100A13	0.116178	-0.0489863	0.0895833	-1.69829	1.69897	1202	S100A13	S100 calcium binding protein A13	6284	chr1:153591347:153591396:-
267	cg14467840	CCACATTTGCAACCTTGGCCATCTGTCCAGAACCTGCTCCCACCTCAGGCCCAGGCCAAC[CG]TGAGTACCCTGCCCCACTGGGCTAGTCCCTGGCCTGCCAGCTTCAGGGAGAGGGGTCTTC	1	151867596	F	S100A13;S100A1;S100A13;S100A13;S100A13;S100A13	0.116178	-0.0928469	0.00127032	-3.2256	3.23026	1202	S100A13	S100 calcium binding protein A13	6284	chr1:153600617:153600666:-
267	cg14467840	CCACATTTGCAACCTTGGCCATCTGTCCAGAACCTGCTCCCACCTCAGGCCCAGGCCAAC[CG]TGAGTACCCTGCCCCACTGGGCTAGTCCCTGGCCTGCCAGCTTCAGGGAGAGGGGTCTTC	1	151867596	F	S100A13;S100A1;S100A13;S100A13;S100A13;S100A13	0.116178	-0.134987	2.64496e-06	-4.7048	4.71928	1202	S100A13	S100 calcium binding protein A13	6284	chr1:153604521:153604570:-
268	cg14473016	CACCACAGACTCTGGGAGGCTCGGCGGCTGGAGCAGCAGGCAGCTCCCCGCAGCTCCCGG[CG]CTTCCAGGCAGCTCTCTGAGCCGTGCCAGAGGCCCGGCCCGCCATTCCCAGGTAGGAGAC	22	34267441	F	RASD2;RASD2	-8.14612	-0.00233055	0.935668	-0.0807328	0.0807329	1202	RASD2	RASD family member 2	23551	chr22:35949976:35950025:+
269	cg14550518	GAAGAGTGTCGGGATCCACACAGGAACACACAGGAGAAATTCACCACTGTGCAGGAGGGA[CG]TGGTTAAGGCGAGTTCTGCCATTAACGTGTAATTAGACAACACTTTTACCCCGCCCCTCC	3	21767942	R	ZNF385D	-2.73239	-0.0429839	0.136386	-1.48992	1.49038	1202	ZNF385D	zinc finger protein 385D	79750	chr3:21462704:21462753:-
270	cg14689355	CGCCGCCGCCTCTTCGTCGCCTCAGCCTGGCGTTTTGTTCCGAGAGACGGGAGAGGCGAG[CG]GAGCTGACAGTGATTTTGACAGTGATTTAAACCCGCTTTTGTTGTTGTTGGCTTTTCGTT	2	148318869	F	ACVR2A	-12.5998	0.0747811	0.00949805	2.59534	2.59777	1202	ACVR2A	activin A receptor type 2A	92	chr2:148687471:148687520:+
270	cg14689355	CGCCGCCGCCTCTTCGTCGCCTCAGCCTGGCGTTTTGTTCCGAGAGACGGGAGAGGCGAG[CG]GAGCTGACAGTGATTTTGACAGTGATTTAAACCCGCTTTTGTTGTTGTTGGCTTTTCGTT	2	148318869	F	ACVR2A	-12.5998	-0.00867822	0.763746	-0.30063	0.300634	1202	ACVR2A	activin A receptor type 2A	92	chr2:148688099:148688148:+
271	cg14747225	AGTGAACTGAGCAACAGCAAGTGCAAAGGCCCTGCTAGCACCATGAGCACGATGAGAGAT[CG]TCCAGGAGGCGGTGTTGATGCGGCAAAGGGCAACAGGAAGGGCATTAGGACTTGAAATCG	16	43024	R	SNRNP25;POLR3K	7.02483	-0.0751723	0.00912882	-2.60897	2.61143	1202	SNRNP25	small nuclear ribonucleoprotein U11/U12 subunit 25	79622	chr16:107173:107222:+
271	cg14747225	AGTGAACTGAGCAACAGCAAGTGCAAAGGCCCTGCTAGCACCATGAGCACGATGAGAGAT[CG]TCCAGGAGGCGGTGTTGATGCGGCAAAGGGCAACAGGAAGGGCATTAGGACTTGAAATCG	16	43024	R	SNRNP25;POLR3K	7.02483	0.0419596	0.145985	1.45438	1.4548	1202	POLR3K	RNA polymerase III subunit K	51728	chr16:97263:97312:-
271	cg14747225	AGTGAACTGAGCAACAGCAAGTGCAAAGGCCCTGCTAGCACCATGAGCACGATGAGAGAT[CG]TCCAGGAGGCGGTGTTGATGCGGCAAAGGGCAACAGGAAGGGCATTAGGACTTGAAATCG	16	43024	R	SNRNP25;POLR3K	7.02483	-0.0585747	0.0423152	-2.03141	2.03258	1202	SNRNP25	small nuclear ribonucleoprotein U11/U12 subunit 25	79622	chr16:107560:107609:+
272	cg14754581	AATCAAAGGCGGGGTACAGGGCCAGAGGGAGGAGGAAACAACTTCCCGGTTGCTTTCAGA[CG]CTTCAGAGATCCTCTGGAGGCCTGGGGGAGCTTTTGAGTACTTTATTTCAGTTGGTCCCT	3	46423757	F	CCRL2;CCRL2;CCRL2	8.9045	0.00258532	0.928653	0.0895583	0.0895584	1202	CCRL2	C-C motif chemokine receptor like 2	9034	chr3:46449865:46449914:+
272	cg14754581	AATCAAAGGCGGGGTACAGGGCCAGAGGGAGGAGGAAACAACTTCCCGGTTGCTTTCAGA[CG]CTTCAGAGATCCTCTGGAGGCCTGGGGGAGCTTTTGAGTACTTTATTTCAGTTGGTCCCT	3	46423757	F	CCRL2;CCRL2;CCRL2	8.9045	0.0218741	0.448646	0.757862	0.757922	1202	CCRL2	C-C motif chemokine receptor like 2	9034	chr3:46450977:46451020:+
272	cg14754581	AATCAAAGGCGGGGTACAGGGCCAGAGGGAGGAGGAAACAACTTCCCGGTTGCTTTCAGA[CG]CTTCAGAGATCCTCTGGAGGCCTGGGGGAGCTTTTGAGTACTTTATTTCAGTTGGTCCCT	3	46423757	F	CCRL2;CCRL2;CCRL2	8.9045	0.0255344	0.376429	0.884728	0.884825	1202	CCRL2	C-C motif chemokine receptor like 2	9034	chr3:46450970:46451014:+
272	cg14754581	AATCAAAGGCGGGGTACAGGGCCAGAGGGAGGAGGAAACAACTTCCCGGTTGCTTTCAGA[CG]CTTCAGAGATCCTCTGGAGGCCTGGGGGAGCTTTTGAGTACTTTATTTCAGTTGGTCCCT	3	46423757	F	CCRL2;CCRL2;CCRL2	8.9045	0.073063	0.0112821	2.53549	2.53776	1202	CCRL2	NA	9034	chr3:46448685:46448734:+
273	cg14916213	CGGAATACTGTCTGGCTGTGCACGTGGAGGTGGCGAAATGTGGAAGCTTAACGAAGTTGG[CG]CCATGAAGCTAAAGACTGCTACCCCGGGGCTCTAGCTCGCTCCGCCTAATGGCGGGCCGC	11	66162394	F	RBM4	7.98166	-0.0139498	0.628983	-0.483267	0.483283	1202	RBM4	NA	NA	chr11:66412132:66412181:+
273	cg14916213	CGGAATACTGTCTGGCTGTGCACGTGGAGGTGGCGAAATGTGGAAGCTTAACGAAGTTGG[CG]CCATGAAGCTAAAGACTGCTACCCCGGGGCTCTAGCTCGCTCCGCCTAATGGCGGGCCGC	11	66162394	F	RBM4	7.98166	0.0082764	0.774382	0.286709	0.286713	1202	RBM4	RNA binding motif protein 4	5936	chr11:66407542:66407591:+
273	cg14916213	CGGAATACTGTCTGGCTGTGCACGTGGAGGTGGCGAAATGTGGAAGCTTAACGAAGTTGG[CG]CCATGAAGCTAAAGACTGCTACCCCGGGGCTCTAGCTCGCTCCGCCTAATGGCGGGCCGC	11	66162394	F	RBM4	7.98166	-0.0296012	0.305161	-1.02572	1.02587	1202	RBM4	RNA binding motif protein 4	5936	chr11:66407425:66407474:+
273	cg14916213	CGGAATACTGTCTGGCTGTGCACGTGGAGGTGGCGAAATGTGGAAGCTTAACGAAGTTGG[CG]CCATGAAGCTAAAGACTGCTACCCCGGGGCTCTAGCTCGCTCCGCCTAATGGCGGGCCGC	11	66162394	F	RBM4	7.98166	0.0162693	0.57309	0.563636	0.563661	1202	RBM4	NA	NA	chr11:66413942:66413991:+
274	cg14918082	CAGCATGCAGGCACCGCCTCCTCATCTGCATAGAGCCGCCCTCCTCTCAGCCAAACCTGC[CG]CTCATCTGCATAAGCCCCGCCTGCTGAAGGCTCTGCAGCTTGAATATTTTCTGAGCGGAA	17	7773962	F	KCNAB3	3.60825	-6.24002e-06	0.999828	-0.000216161	0.000216161	1202	KCNAB3	potassium voltage-gated channel subfamily A regulatory beta subunit 3	9196	chr17:7826256:7826305:-
275	cg14972143	GAGGGACGACAGCTTTTACTGTCCCAAATCCTGAGATTAAGACCTCAGGGCTAAATCTTG[CG]TGGCGGTAAAAATTATTTGGAAGTTCTGTGCAACCGTTCCAATATTCCGCTTTTACGTGC	4	100070026	R	EIF4E;EIF4E;EIF4E;EIF4E;EIF4E	0.385312	-0.0385601	0.181556	-1.33642	1.33676	1202	EIF4E	eukaryotic translation initiation factor 4E	1977	chr4:99800135:99800184:-
275	cg14972143	GAGGGACGACAGCTTTTACTGTCCCAAATCCTGAGATTAAGACCTCAGGGCTAAATCTTG[CG]TGGCGGTAAAAATTATTTGGAAGTTCTGTGCAACCGTTCCAATATTCCGCTTTTACGTGC	4	100070026	R	EIF4E;EIF4E;EIF4E;EIF4E;EIF4E	0.385312	0.0520079	0.0714745	1.80323	1.80405	1202	EIF4E	eukaryotic translation initiation factor 4E	1977	chr4:99806073:99806102:-,chr4:99802274:99802293:-
275	cg14972143	GAGGGACGACAGCTTTTACTGTCCCAAATCCTGAGATTAAGACCTCAGGGCTAAATCTTG[CG]TGGCGGTAAAAATTATTTGGAAGTTCTGTGCAACCGTTCCAATATTCCGCTTTTACGTGC	4	100070026	R	EIF4E;EIF4E;EIF4E;EIF4E;EIF4E	0.385312	0.00961298	0.739178	0.333014	0.333019	1202	EIF4E	eukaryotic translation initiation factor 4E	1977	chr4:99850391:99850440:-
275	cg14972143	GAGGGACGACAGCTTTTACTGTCCCAAATCCTGAGATTAAGACCTCAGGGCTAAATCTTG[CG]TGGCGGTAAAAATTATTTGGAAGTTCTGTGCAACCGTTCCAATATTCCGCTTTTACGTGC	4	100070026	R	EIF4E;EIF4E;EIF4E;EIF4E;EIF4E	0.385312	0.0157851	0.584563	0.546857	0.54688	1202	EIF4E	eukaryotic translation initiation factor 4E	1977	chr4:99801546:99801595:-
275	cg14972143	GAGGGACGACAGCTTTTACTGTCCCAAATCCTGAGATTAAGACCTCAGGGCTAAATCTTG[CG]TGGCGGTAAAAATTATTTGGAAGTTCTGTGCAACCGTTCCAATATTCCGCTTTTACGTGC	4	100070026	R	EIF4E;EIF4E;EIF4E;EIF4E;EIF4E	0.385312	-0.00148328	0.959029	-0.0513822	0.0513822	1202	EIF4E	eukaryotic translation initiation factor 4E	1977	chr4:99799658:99799707:-
275	cg14972143	GAGGGACGACAGCTTTTACTGTCCCAAATCCTGAGATTAAGACCTCAGGGCTAAATCTTG[CG]TGGCGGTAAAAATTATTTGGAAGTTCTGTGCAACCGTTCCAATATTCCGCTTTTACGTGC	4	100070026	R	EIF4E;EIF4E;EIF4E;EIF4E;EIF4E	0.385312	-0.00611066	0.83239	-0.211682	0.211683	1202	EIF4E	eukaryotic translation initiation factor 4E	1977	chr8:14167205:14167254:+
275	cg14972143	GAGGGACGACAGCTTTTACTGTCCCAAATCCTGAGATTAAGACCTCAGGGCTAAATCTTG[CG]TGGCGGTAAAAATTATTTGGAAGTTCTGTGCAACCGTTCCAATATTCCGCTTTTACGTGC	4	100070026	R	EIF4E;EIF4E;EIF4E;EIF4E;EIF4E	0.385312	0.0516086	0.0736804	1.78936	1.79016	1202	EIF4E	eukaryotic translation initiation factor 4E	1977	chr8:14166979:14167028:+
275	cg14972143	GAGGGACGACAGCTTTTACTGTCCCAAATCCTGAGATTAAGACCTCAGGGCTAAATCTTG[CG]TGGCGGTAAAAATTATTTGGAAGTTCTGTGCAACCGTTCCAATATTCCGCTTTTACGTGC	4	100070026	R	EIF4E;EIF4E;EIF4E;EIF4E;EIF4E	0.385312	-0.0238492	0.408743	-0.826319	0.826397	1202	EIF4E	eukaryotic translation initiation factor 4E	1977	chr17:47500650:47500699:-
275	cg14972143	GAGGGACGACAGCTTTTACTGTCCCAAATCCTGAGATTAAGACCTCAGGGCTAAATCTTG[CG]TGGCGGTAAAAATTATTTGGAAGTTCTGTGCAACCGTTCCAATATTCCGCTTTTACGTGC	4	100070026	R	EIF4E;EIF4E;EIF4E;EIF4E;EIF4E	0.385312	0.00423553	0.883374	0.146724	0.146724	1202	EIF4E	eukaryotic translation initiation factor 4E	1977	chr17:47502259:47502308:-
275	cg14972143	GAGGGACGACAGCTTTTACTGTCCCAAATCCTGAGATTAAGACCTCAGGGCTAAATCTTG[CG]TGGCGGTAAAAATTATTTGGAAGTTCTGTGCAACCGTTCCAATATTCCGCTTTTACGTGC	4	100070026	R	EIF4E;EIF4E;EIF4E;EIF4E;EIF4E	0.385312	-0.0457937	0.112549	-1.58745	1.588	1202	EIF4E	eukaryotic translation initiation factor 4E	1977	chr3:182178225:182178274:-
275	cg14972143	GAGGGACGACAGCTTTTACTGTCCCAAATCCTGAGATTAAGACCTCAGGGCTAAATCTTG[CG]TGGCGGTAAAAATTATTTGGAAGTTCTGTGCAACCGTTCCAATATTCCGCTTTTACGTGC	4	100070026	R	EIF4E;EIF4E;EIF4E;EIF4E;EIF4E	0.385312	-0.0147131	0.610333	-0.509714	0.509732	1202	EIF4E	eukaryotic translation initiation factor 4E	1977	chr4:99802005:99802053:-
276	cg15013019	TCAGGGCTGGCAGTCTGGGCCAGGGTGTGGTTTCCAGCGTCAGGCCAGGCTCTGCTGTCT[CG]CGAGGGTCCGGCCTCAATGCTCCAGGCCCCGGCGTTGGGCCGCGCCTCCTCGTGGGCCTC	19	13074451	R	LYL1;LYL1	-2.5333	-0.000148471	0.995897	-0.00514318	0.00514318	1202	LYL1	LYL1, basic helix-loop-helix family member	4066	chr19:13209847:13209895:-
277	cg15171237	TTCTTGACATTCAGAAGTCAGATTCAGGGACCCCATGGCAGAGCCTGTTTCTAACACTTG[CG]CCTATTCGACTATAGGGACTATATTCTGCACAGAAATATACTTAGTTTTATATATGGTTA	4	185808952	R	CASP3;CCDC111;CASP3	-1.98151	-0.0072081	0.80286	-0.2497	0.249702	1202	CASP3	caspase 3	836	chr4:185549046:185549095:-
277	cg15171237	TTCTTGACATTCAGAAGTCAGATTCAGGGACCCCATGGCAGAGCCTGTTTCTAACACTTG[CG]CCTATTCGACTATAGGGACTATATTCTGCACAGAAATATACTTAGTTTTATATATGGTTA	4	185808952	R	CASP3;CCDC111;CASP3	-1.98151	-0.0192309	0.505348	-0.666259	0.6663	1202	CASP3	caspase 3	836	chr4:185569620:185569669:-
277	cg15171237	TTCTTGACATTCAGAAGTCAGATTCAGGGACCCCATGGCAGAGCCTGTTTCTAACACTTG[CG]CCTATTCGACTATAGGGACTATATTCTGCACAGAAATATACTTAGTTTTATATATGGTTA	4	185808952	R	CASP3;CCDC111;CASP3	-1.98151	-0.0490526	0.0891494	-1.7006	1.70128	1202	CCDC111	primase and DNA directed polymerase	201973	chr4:185603480:185603490:+,chr4:185606563:185606601:+
278	cg15201877	GGACAGGTACACGACGATGACGACCGGGGTGGTGAGAAGCTGCCCGACCAGGTCGGTGAG[CG]CCAGCCAGCCGATGCACAGCAGGAAGGACTTCTTGCGCTTGCTCTCCCGGCGCCGGTAGC	1	71285561	F	PTGER3;PTGER3;PTGER3;PTGER3;PTGER3;PTGER3;PTGER3;PTGER3;PTGER3;PTGER3	1.46705	0.0289498	0.315932	1.00313	1.00327	1202	PTGER3	prostaglandin E receptor 3	5733	chr1:71477123:71477172:-
278	cg15201877	GGACAGGTACACGACGATGACGACCGGGGTGGTGAGAAGCTGCCCGACCAGGTCGGTGAG[CG]CCAGCCAGCCGATGCACAGCAGGAAGGACTTCTTGCGCTTGCTCTCCCGGCGCCGGTAGC	1	71285561	F	PTGER3;PTGER3;PTGER3;PTGER3;PTGER3;PTGER3;PTGER3;PTGER3;PTGER3;PTGER3	1.46705	0.015497	0.591439	0.536875	0.536896	1202	PTGER3	prostaglandin E receptor 3	5733	chr1:71512414:71512463:-
278	cg15201877	GGACAGGTACACGACGATGACGACCGGGGTGGTGAGAAGCTGCCCGACCAGGTCGGTGAG[CG]CCAGCCAGCCGATGCACAGCAGGAAGGACTTCTTGCGCTTGCTCTCCCGGCGCCGGTAGC	1	71285561	F	PTGER3;PTGER3;PTGER3;PTGER3;PTGER3;PTGER3;PTGER3;PTGER3;PTGER3;PTGER3	1.46705	-0.00250809	0.930779	-0.086883	0.0868831	1202	PTGER3	prostaglandin E receptor 3	5733	chr1:71418455:71418504:-
278	cg15201877	GGACAGGTACACGACGATGACGACCGGGGTGGTGAGAAGCTGCCCGACCAGGTCGGTGAG[CG]CCAGCCAGCCGATGCACAGCAGGAAGGACTTCTTGCGCTTGCTCTCCCGGCGCCGGTAGC	1	71285561	F	PTGER3;PTGER3;PTGER3;PTGER3;PTGER3;PTGER3;PTGER3;PTGER3;PTGER3;PTGER3	1.46705	0.0124548	0.666196	0.43147	0.431481	1202	PTGER3	prostaglandin E receptor 3	5733	chr1:71436697:71436746:-
278	cg15201877	GGACAGGTACACGACGATGACGACCGGGGTGGTGAGAAGCTGCCCGACCAGGTCGGTGAG[CG]CCAGCCAGCCGATGCACAGCAGGAAGGACTTCTTGCGCTTGCTCTCCCGGCGCCGGTAGC	1	71285561	F	PTGER3;PTGER3;PTGER3;PTGER3;PTGER3;PTGER3;PTGER3;PTGER3;PTGER3;PTGER3	1.46705	-0.0290613	0.314071	-1.007	1.00714	1202	PTGER3	NA	5733	chr1:71351961:71352007:-,chr1:71349740:71349742:-
278	cg15201877	GGACAGGTACACGACGATGACGACCGGGGTGGTGAGAAGCTGCCCGACCAGGTCGGTGAG[CG]CCAGCCAGCCGATGCACAGCAGGAAGGACTTCTTGCGCTTGCTCTCCCGGCGCCGGTAGC	1	71285561	F	PTGER3;PTGER3;PTGER3;PTGER3;PTGER3;PTGER3;PTGER3;PTGER3;PTGER3;PTGER3	1.46705	-0.0393777	0.172464	-1.36479	1.36514	1202	PTGER3	prostaglandin E receptor 3	5733	chr1:71331443:71331492:-
278	cg15201877	GGACAGGTACACGACGATGACGACCGGGGTGGTGAGAAGCTGCCCGACCAGGTCGGTGAG[CG]CCAGCCAGCCGATGCACAGCAGGAAGGACTTCTTGCGCTTGCTCTCCCGGCGCCGGTAGC	1	71285561	F	PTGER3;PTGER3;PTGER3;PTGER3;PTGER3;PTGER3;PTGER3;PTGER3;PTGER3;PTGER3	1.46705	-0.018207	0.528282	-0.630779	0.630814	1202	PTGER3	prostaglandin E receptor 3	5733	chr1:71418454:71418503:-
278	cg15201877	GGACAGGTACACGACGATGACGACCGGGGTGGTGAGAAGCTGCCCGACCAGGTCGGTGAG[CG]CCAGCCAGCCGATGCACAGCAGGAAGGACTTCTTGCGCTTGCTCTCCCGGCGCCGGTAGC	1	71285561	F	PTGER3;PTGER3;PTGER3;PTGER3;PTGER3;PTGER3;PTGER3;PTGER3;PTGER3;PTGER3	1.46705	0.0089251	0.757233	0.309183	0.309187	1202	PTGER3	prostaglandin E receptor 3	5733	chr1:71478084:71478133:-
279	cg15344028	TTCCAGCAAATAGAAAACAACCGAGAGCCTGAATTCACTGTCAGCTTTGAACACTGAACG[CG]AGGACTGTTAACTGTTTCTGGCAAACATGAAGTCAGGCCTCTGGTATTTCTTTCTCTTCT	2	204509755	F	ICOS;ICOS	-9.50421	-0.0278103	0.335365	-0.963627	0.963751	1202	ICOS	inducible T-cell costimulator	29851	chr2:204826126:204826175:+
280	cg15381313	CTTTCAAAGGCAAGCTGCAGGGCTCCTTGGTTTTGTCACATTCCTCATTCTGGGGCTTTG[CG]GTTTTGTCTTGGGAATCTCGAGGCTCTCCCAAGGTTCCTTTCTATGTTTATATCATTTAG	12	99391640	R	NR1H4	0.00207884	0.0573597	0.0467872	1.98918	1.99027	1202	NR1H4	nuclear receptor subfamily 1 group H member 4	9971	chr12:100957114:100957163:+
281	cg15427448	CTGGTCCCCCCGGCGGGCGGCGGCGCGGGCAGGGGCAAGGGCTCCGGGCTCCTGCGGCTG[CG]TTGGCTGCTCAGGCCACCATAATCCAGCTCGCGGCTCGCAGCTCCCGGGCGGGCTGGGGA	11	116692106	F	BACE1;BACE1;BACE1;BACE1;BACE1;BACE1;BACE1;BACE1	2.26177	-0.0428623	0.1375	-1.4857	1.48616	1202	BACE1	beta-secretase 1	23621	chr11:117156974:117157023:-
281	cg15427448	CTGGTCCCCCCGGCGGGCGGCGGCGCGGGCAGGGGCAAGGGCTCCGGGCTCCTGCGGCTG[CG]TTGGCTGCTCAGGCCACCATAATCCAGCTCGCGGCTCGCAGCTCCCGGGCGGGCTGGGGA	11	116692106	F	BACE1;BACE1;BACE1;BACE1;BACE1;BACE1;BACE1;BACE1	2.26177	0.0299277	0.299856	1.03704	1.03719	1202	BACE1	beta-secretase 1	23621	chr11:117156721:117156770:-
282	cg15447479	GTCTCCTAGGGCTGAAGACAACTTGGATTGCGAGGCTAGGGCTTGGGGAGTCGTGCATCC[CG]TTCCGGGCCTCCGCAGCCCAACATGGGCCCCGGGTTCCAAAGTTTGCGAAGTTGGGCGCC	7	128616001	R	SMO;SMO	17.0627	0.0562378	0.0512631	1.95019	1.95122	1202	SMO	smoothened, frizzled class receptor	6608	chr7:128853064:128853113:+
283	cg15489301	TTAAAACTGTTTTCCAGGGCAGTTTCTCTCTCTGGTTCTAGGACACTTAATTGGGCTCAA[CG]TTTCCCCCAAGTCTTGGCTGTGGGTTTGTTGTGGGCTGGGTGGTTGAGGAGAGGATGCAG	7	133863578	R	AKR1B10	-0.925473	0.00428339	0.882066	0.148382	0.148382	1202	AKR1B10	aldo-keto reductase family 1 member B10	57016	chr7:134223746:134223769:+,chr7:134225799:134225824:+
284	cg15498283	CCGCAGACCCCTCGGTCTTGCTATGTCGAGCTCACCCGTGAAGCGTCAGAGGATGGAGTC[CG]CGCTGGACCAGCTCAAGCAGTTCACCACCGTGGTGGCCGACACGGGCGACTTCCACGGTG	11	737520	R	TALDO1	1.74362	-0.0595168	0.039101	-2.06416	2.06538	1202	TALDO1	NA	6888	chr11:760309:760358:+
284	cg15498283	CCGCAGACCCCTCGGTCTTGCTATGTCGAGCTCACCCGTGAAGCGTCAGAGGATGGAGTC[CG]CGCTGGACCAGCTCAAGCAGTTCACCACCGTGGTGGCCGACACGGGCGACTTCCACGGTG	11	737520	R	TALDO1	1.74362	0.0451144	0.117987	1.56387	1.5644	1202	TALDO1	transaldolase 1	6888	chr11:764363:764412:+
285	cg15551881	CGTGTCACAGACTCTCAGAAAGCACAGTGAGAGTTCCCCTGGTTGAGAATCGCAGGCTGC[CG]CTGGCTTCCCCCACTTCCCTGGGCACATCGGAGGAGGGGGCCACAGCTGGTCCCTGGTCT	9	122728536	R	TRAF1	5.21612	-0.022274	0.440393	-0.771722	0.771786	1202	TRAF1	TNF receptor associated factor 1	7185	chr9:123664902:123664951:-
285	cg15551881	CGTGTCACAGACTCTCAGAAAGCACAGTGAGAGTTCCCCTGGTTGAGAATCGCAGGCTGC[CG]CTGGCTTCCCCCACTTCCCTGGGCACATCGGAGGAGGGGGCCACAGCTGGTCCCTGGTCT	9	122728536	R	TRAF1	5.21612	-0.0153715	0.594445	-0.532528	0.532549	1202	TRAF1	TNF receptor associated factor 1	7185	chr9:123665285:123665334:-
286	cg15569512	CCCCGAGGCTCCCGCATCAACGCCCTCAGTCGGATGGGACTGAGGGTGCCGCCGCCACCA[CG]CCGGGGACTGTTGACAGCCAGAACCTTTAAGCGTAACAGAGTCACCTGGCAAGTTTGTAC	14	103099420	F	BAG5;BAG5;BAG5;C14orf153	-12.9509	-0.000299245	0.991731	-0.0103661	0.0103661	1202	BAG5	BCL2 associated athanogene 5	9529	chr14:104023674:104023723:-
286	cg15569512	CCCCGAGGCTCCCGCATCAACGCCCTCAGTCGGATGGGACTGAGGGTGCCGCCGCCACCA[CG]CCGGGGACTGTTGACAGCCAGAACCTTTAAGCGTAACAGAGTCACCTGGCAAGTTTGTAC	14	103099420	F	BAG5;BAG5;BAG5;C14orf153	-12.9509	0.0325931	0.258846	1.12946	1.12966	1202	BAG5	BCL2 associated athanogene 5	9529	chr14:104029043:104029092:-
286	cg15569512	CCCCGAGGCTCCCGCATCAACGCCCTCAGTCGGATGGGACTGAGGGTGCCGCCGCCACCA[CG]CCGGGGACTGTTGACAGCCAGAACCTTTAAGCGTAACAGAGTCACCTGGCAAGTTTGTAC	14	103099420	F	BAG5;BAG5;BAG5;C14orf153	-12.9509	-0.00379373	0.895465	-0.131419	0.13142	1202	BAG5	BCL2 associated athanogene 5	9529	chr14:104028311:104028360:-
286	cg15569512	CCCCGAGGCTCCCGCATCAACGCCCTCAGTCGGATGGGACTGAGGGTGCCGCCGCCACCA[CG]CCGGGGACTGTTGACAGCCAGAACCTTTAAGCGTAACAGAGTCACCTGGCAAGTTTGTAC	14	103099420	F	BAG5;BAG5;BAG5;C14orf153	-12.9509	0.043153	0.134849	1.49579	1.49626	1202	BAG5	BCL2 associated athanogene 5	9529	chr14:104023351:104023400:-
286	cg15569512	CCCCGAGGCTCCCGCATCAACGCCCTCAGTCGGATGGGACTGAGGGTGCCGCCGCCACCA[CG]CCGGGGACTGTTGACAGCCAGAACCTTTAAGCGTAACAGAGTCACCTGGCAAGTTTGTAC	14	103099420	F	BAG5;BAG5;BAG5;C14orf153	-12.9509	0.0109632	0.704163	0.37979	0.379798	1202	C14orf153	NA	84334	chr14:104058212:104058261:+
287	cg15611364	ATTGGCAGGTCCTCGATTATCGGCGAGTCACTGAGGTTCCGAGAGGGGCGTCTCTGCTCA[CG]CAAACAGCTACCCAGCCGCCTCCCACGGTCTGACCTCAGCCAAGGTGACGCGGCTTAAAG	3	25806427	F	OXSM;NGLY1;OXSM;OXSM;NGLY1	63.1242	-0.0160793	0.577581	-0.55705	0.557074	1202	NGLY1	N-glycanase 1	55768	chr3:25761025:25761074:-
287	cg15611364	ATTGGCAGGTCCTCGATTATCGGCGAGTCACTGAGGTTCCGAGAGGGGCGTCTCTGCTCA[CG]CAAACAGCTACCCAGCCGCCTCCCACGGTCTGACCTCAGCCAAGGTGACGCGGCTTAAAG	3	25806427	F	OXSM;NGLY1;OXSM;OXSM;NGLY1	63.1242	0.015875	0.582424	0.549973	0.549996	1202	OXSM	3-oxoacyl-ACP synthase, mitochondrial	54995	chr3:25835731:25835780:+
288	cg15642326	CTGTATCTCTTTGTCTCTCCCTGTGTGTGTGTGGGGTCTCTCTCAGTCTTTGTCCCTCTG[CG]TCTCTGGGTCTCTCTGTCTCTGTCTCCCTGCGTCTCTCTCTCTCTGTCATCTGGCTCTTC	19	50445986	R	MARK4	0.0325027	-0.0617146	0.0323993	-2.14058	2.14194	1202	MARK4	microtubule affinity regulating kinase 4	57787	chr19:45808265:45808314:+
289	cg15811427	AGAGGGCAGGGCTGTATTCCGCTACTGGGTCCTATGCACCATGCAGAACCAGTGTCTTCA[CG]TGGAGACTCATCACTGATCCGAAAGGTGACTGCTTCTGTATTACACTCATTTCCCCATGA	19	56946034	F	FPR1	-8.00932	-0.487649	8.19947e-73	-18.4627	19.3492	1202	FPR1	formyl peptide receptor 1	2357	chr19:52249456:52249505:-
331	cg17770886	ATGGTTACATGATTTCCTTCTGTGCGATCATCAGAGTCACTCGCAGACCTGGATGGTGTA[CG]GCCTACAATGCACCTAAACCACCTAGAGGAGCCTCTTGCTCGTGGGCTACAAACCTGCCC	10	134971321	F	TUBGCP2;ZNF511	3.82767	0.107947	0.000177126	3.75403	3.76138	1202	TUBGCP2	tubulin gamma complex associated protein 2	10844	chr10:135094777:135094811:-,chr10:135093391:135093405:-
331	cg17770886	ATGGTTACATGATTTCCTTCTGTGCGATCATCAGAGTCACTCGCAGACCTGGATGGTGTA[CG]GCCTACAATGCACCTAAACCACCTAGAGGAGCCTCTTGCTCGTGGGCTACAAACCTGCCC	10	134971321	F	TUBGCP2;ZNF511	3.82767	-0.0227365	0.430958	-0.787751	0.787819	1202	ZNF511	zinc finger protein 511	118472	chr10:135126554:135126603:+
291	cg15881088	TCCGGGCGAGGAGATCAGCAGGGGTTTTCGAGGGAGCCTGGGGCCCAGGGCAGGGGTACG[CG]GGTCAACTCAACAGATGTAAGGCGTGGCCGAACCCCATTCAGCTAGCAGTACCCAGCCTC	3	51397414	F	MANF	-15.2185	-0.0132294	0.646806	-0.458306	0.45832	1202	MANF	mesencephalic astrocyte derived neurotrophic factor	7873	chr3:51426493:51426542:+
292	cg15887846	ACTTCTCCGAGGTTACACAGCTAGGAAATGGTGGCAACAGTAAGAGCCCACGAAGAGCTG[CG]GTTGGTAGTTCATTCTGGACAGCCCTCCCGTGAACCGTCCCTGTACTGGCACTTGTTGCT	11	65535768	F	CST6	-0.7429	0.0228921	0.42781	0.793145	0.793214	1202	CST6	cystatin E/M	1474	chr11:65779698:65779747:+
292	cg15887846	ACTTCTCCGAGGTTACACAGCTAGGAAATGGTGGCAACAGTAAGAGCCCACGAAGAGCTG[CG]GTTGGTAGTTCATTCTGGACAGCCCTCCCGTGAACCGTCCCTGTACTGGCACTTGTTGCT	11	65535768	F	CST6	-0.7429	0.0101223	0.725902	0.350658	0.350664	1202	CST6	cystatin E/M	1474	chr11:65780414:65780422:+,chr11:65780788:65780828:+
293	cg15903282	CGATTAGTAAATACCAACCCATGCTAGAGAGTGAAGAGCTCTGGAGGAGAGGCACGGGTG[CG]CCCCTGGAGTTGCTCTAAACAGGGTAGGCAGGGTGCTCTTGTCACAGAGAAGATGAACGA	3	135996380	F	EPHB1	-3.47348	0.0241313	0.403221	0.836097	0.836178	1202	EPHB1	EPH receptor B1	2047	chr3:134978911:134978960:+
294	cg15963417	CCCAAGCCCCGTCGATTAGACAGGTTTAGGCACTTCCGGGACTCTCAGAAGCCTGGGAAG[CG]AGTTCTCTGCAATTGGACTAAGCCTGCGACCGTCTGGTATAACAATTATATGAATAATCC	12	101835430	F	PAH;PAH	-34.6984	0.00789413	0.78454	0.273466	0.273469	1202	PAH	phenylalanine hydroxylase	5053	chr12:103232902:103232951:-
294	cg15963417	CCCAAGCCCCGTCGATTAGACAGGTTTAGGCACTTCCGGGACTCTCAGAAGCCTGGGAAG[CG]AGTTCTCTGCAATTGGACTAAGCCTGCGACCGTCTGGTATAACAATTATATGAATAATCC	12	101835430	F	PAH;PAH	-34.6984	-0.0452627	0.116783	-1.56902	1.56955	1202	PAH	phenylalanine hydroxylase	5053	chr12:103232195:103232244:-
295	cg15966757	CAGGTCGGGCCAGTTGCTGGTGAGCTTATGAAGTGTGGTCTCCTCCCCGGAGCTCATGTG[CG]CTTCCCACCTGGTGAGCTCAGGGTCTCTCTGGAGGGATCCTGCCTCCCACCCCTGTCTCC	12	242520	R	SLC6A13	-7.74639	0.0201354	0.48553	0.697604	0.697652	1202	SLC6A13	solute carrier family 6 member 13	6540	chr12:330125:330174:-
296	cg16085042	TTTTCCCTTAGAGGCCAAGGCCGCCCAGGCAAAGGGGCGGTCCCACGTGTGAGGGGCCCG[CG]GAGCCATTTGATTGGAGAAAAGCTGCAAACCCTGACCAATCGGAAGGAGCCACGCTTCGG	12	102848087	F	LOC253724;HSP90B1	-9.05812	0.0135999	0.637614	0.471143	0.471158	1202	HSP90B1	heat shock protein 90 beta family member 1	7184	chr12:104341535:104341584:+
296	cg16085042	TTTTCCCTTAGAGGCCAAGGCCGCCCAGGCAAAGGGGCGGTCCCACGTGTGAGGGGCCCG[CG]GAGCCATTTGATTGGAGAAAAGCTGCAAACCCTGACCAATCGGAAGGAGCCACGCTTCGG	12	102848087	F	LOC253724;HSP90B1	-9.05812	0.0538322	0.0620742	1.86661	1.86751	1202	LOC253724	tetratricopeptide repeat domain 41, pseudogene	253724	chr12:104237908:104237957:-
296	cg16085042	TTTTCCCTTAGAGGCCAAGGCCGCCCAGGCAAAGGGGCGGTCCCACGTGTGAGGGGCCCG[CG]GAGCCATTTGATTGGAGAAAAGCTGCAAACCCTGACCAATCGGAAGGAGCCACGCTTCGG	12	102848087	F	LOC253724;HSP90B1	-9.05812	-0.0192825	0.504204	-0.668049	0.66809	1202	LOC253724	NA	NA	chr12:104297434:104297483:-
296	cg16085042	TTTTCCCTTAGAGGCCAAGGCCGCCCAGGCAAAGGGGCGGTCCCACGTGTGAGGGGCCCG[CG]GAGCCATTTGATTGGAGAAAAGCTGCAAACCCTGACCAATCGGAAGGAGCCACGCTTCGG	12	102848087	F	LOC253724;HSP90B1	-9.05812	0.0239072	0.407604	0.828329	0.828408	1202	LOC253724	tetratricopeptide repeat domain 41, pseudogene	NA	chr12:104305096:104305130:-,chr12:104300116:104300130:-
296	cg16085042	TTTTCCCTTAGAGGCCAAGGCCGCCCAGGCAAAGGGGCGGTCCCACGTGTGAGGGGCCCG[CG]GAGCCATTTGATTGGAGAAAAGCTGCAAACCCTGACCAATCGGAAGGAGCCACGCTTCGG	12	102848087	F	LOC253724;HSP90B1	-9.05812	0.0273721	0.34304	0.948433	0.948551	1202	HSP90B1	heat shock protein 90 beta family member 1	7184	chr15:99798150:99798199:+
296	cg16085042	TTTTCCCTTAGAGGCCAAGGCCGCCCAGGCAAAGGGGCGGTCCCACGTGTGAGGGGCCCG[CG]GAGCCATTTGATTGGAGAAAAGCTGCAAACCCTGACCAATCGGAAGGAGCCACGCTTCGG	12	102848087	F	LOC253724;HSP90B1	-9.05812	-0.00201696	0.944309	-0.0698695	0.0698696	1202	LOC253724	NA	NA	chr12:104306011:104306060:-
297	cg16173067	CAGGGTGAGAGCAGGTCTCACTCATCCCAATCCCAGCCAGGATTGGGTCAGGGCCCCCAG[CG]CTTACCTGCAGGCAAGGTGCTGCTCCACGACCTTCTCCAGCTGCTGCCGCTGCTGAATCT	20	1257722	F	SDCBP2	8.01276	0.0288535	0.317545	0.999793	0.999932	1202	SDCBP2	NA	27111	chr20:1290839:1290888:-
297	cg16173067	CAGGGTGAGAGCAGGTCTCACTCATCCCAATCCCAGCCAGGATTGGGTCAGGGCCCCCAG[CG]CTTACCTGCAGGCAAGGTGCTGCTCCACGACCTTCTCCAGCTGCTGCCGCTGCTGAATCT	20	1257722	F	SDCBP2	8.01276	-0.0194007	0.501594	-0.672145	0.672187	1202	SDCBP2	NA	27111	chr20:1291006:1291055:-
297	cg16173067	CAGGGTGAGAGCAGGTCTCACTCATCCCAATCCCAGCCAGGATTGGGTCAGGGCCCCCAG[CG]CTTACCTGCAGGCAAGGTGCTGCTCCACGACCTTCTCCAGCTGCTGCCGCTGCTGAATCT	20	1257722	F	SDCBP2	8.01276	0.0485165	0.0927045	1.68198	1.68264	1202	SDCBP2	syndecan binding protein 2	27111	chr20:1294228:1294277:-
297	cg16173067	CAGGGTGAGAGCAGGTCTCACTCATCCCAATCCCAGCCAGGATTGGGTCAGGGCCCCCAG[CG]CTTACCTGCAGGCAAGGTGCTGCTCCACGACCTTCTCCAGCTGCTGCCGCTGCTGAATCT	20	1257722	F	SDCBP2	8.01276	-0.063114	0.0286652	-2.18924	2.1907	1202	SDCBP2	NA	27111	chr20:1298962:1299011:-
298	cg16295988	GGCTGGGCCAGGGTGGGGCGTGGCCCGGGGCGGGGGAGGGGCGGGGCTGCCAGGCAGGGG[CG]GGACGGAGAACACCTGGGTCCCTAGCACCAAGACTGGCTTTTTATTCATTGCCACCGCCT	9	114520446	F	C9orf80	3.55827	0.000479428	0.986752	0.0166079	0.0166079	1202	C9orf80	INTS3 and NABP interacting protein	58493	chr9:115449505:115449554:-
298	cg16295988	GGCTGGGCCAGGGTGGGGCGTGGCCCGGGGCGGGGGAGGGGCGGGGCTGCCAGGCAGGGG[CG]GGACGGAGAACACCTGGGTCCCTAGCACCAAGACTGGCTTTTTATTCATTGCCACCGCCT	9	114520446	F	C9orf80	3.55827	0.0202502	0.483046	0.701582	0.70163	1202	C9orf80	INTS3 and NABP interacting protein	58493	chr9:115448833:115448882:-
299	cg16313343	TGGTTACCCGTGAGTCACCTCGCTGTGCCCCCTGCCCAGAGCGGGAACCCTGGCTGCGCA[CG]CCCTCAAATATCTGCAGGTGCTGTTCACAATCGCCATAGGGCCGGTGACATACCCAGGAA	14	104839154	F	BRF1	6.02387	-0.0459254	0.111517	-1.59202	1.59258	1202	BRF1	NA	2972	chr14:105714266:105714315:-
299	cg16313343	TGGTTACCCGTGAGTCACCTCGCTGTGCCCCCTGCCCAGAGCGGGAACCCTGGCTGCGCA[CG]CCCTCAAATATCTGCAGGTGCTGTTCACAATCGCCATAGGGCCGGTGACATACCCAGGAA	14	104839154	F	BRF1	6.02387	0.0157266	0.585955	0.544831	0.544854	1202	BRF1	BRF1, RNA polymerase III transcription initiation factor 90 kDa subunit	2972	chr14:105675895:105675944:-
299	cg16313343	TGGTTACCCGTGAGTCACCTCGCTGTGCCCCCTGCCCAGAGCGGGAACCCTGGCTGCGCA[CG]CCCTCAAATATCTGCAGGTGCTGTTCACAATCGCCATAGGGCCGGTGACATACCCAGGAA	14	104839154	F	BRF1	6.02387	-0.0194314	0.500917	-0.673209	0.673251	1202	BRF1	BRF1, RNA polymerase III transcription initiation factor 90 kDa subunit	2972	chr14:105722855:105722883:-,chr14:105718896:105718916:-
300	cg16319578	GGGAGCTGAGTTGCTGGTAGTGCCCGTGGTGCTTGGTTCGAGGTGGCCGTTAGTTGACTC[CG]CGGAGTTCATCTCCCTGGTTTTCCCGTCCTAACGTCGCTCGCCTTTCAGTCAGGATGTCT	14	64077265	R	HSPA2;HSPA2	0.155278	-0.0136411	0.636594	-0.472572	0.472587	1202	HSPA2	heat shock protein family A (Hsp70) member 2	3306	chr14:65009289:65009338:+
300	cg16319578	GGGAGCTGAGTTGCTGGTAGTGCCCGTGGTGCTTGGTTCGAGGTGGCCGTTAGTTGACTC[CG]CGGAGTTCATCTCCCTGGTTTTCCCGTCCTAACGTCGCTCGCCTTTCAGTCAGGATGTCT	14	64077265	R	HSPA2;HSPA2	0.155278	0.000163943	0.99547	0.00567916	0.00567916	1202	HSPA2	heat shock protein family A (Hsp70) member 2	3306	chr14:65009560:65009609:+
301	cg16340918	GGCTAGGGACGTTATGTAAGTTGAGCCACGCTACGCTAAAAGTTCCACACTCAATTCTAG[CG]TCTCGGCTCTGGACTACCAAGTTCCGGAGCAAGCAGACAGACCACCTCTTTACGTTCCCG	10	94342680	F	KIF11	32.1467	-0.0134562	0.641173	-0.466164	0.466178	1202	KIF11	kinesin family member 11	3832	chr10:94414801:94414850:+
301	cg16340918	GGCTAGGGACGTTATGTAAGTTGAGCCACGCTACGCTAAAAGTTCCACACTCAATTCTAG[CG]TCTCGGCTCTGGACTACCAAGTTCCGGAGCAAGCAGACAGACCACCTCTTTACGTTCCCG	10	94342680	F	KIF11	32.1467	-0.0420743	0.144885	-1.45836	1.45879	1202	KIF11	kinesin family member 11	3832	chr10:94414587:94414637:+
303	cg16357381	CGCCGCCCCCCCCACCCCTCCCCCAGACAAACGATATGACGCACTTAACTATAAACCCCC[CG]ACCCCCCGTGGCTTCTGGGAATTTCCCAGAAGGTTCTGCATGGGCAGATGCTGAGGGAGT	3	48607896	F	COL7A1	-1.88052	0.0272492	0.345211	0.944174	0.944291	1202	COL7A1	collagen type VII alpha 1 chain	1294	chr3:48601677:48601726:-
304	cg16372520	TATTTAAAGATTGTGGCTAATAGTAGAGTAGATACCCCTGGTATTTCCCAGAGCAGAGCT[CG]CATTCTGGGAATCTTAGGTCCATGTGACTTCCTGAGTCAGTGATTCACACTGAGAAAAGA	14	77939504	F	NRXN3	0.710588	-0.0162502	0.573541	-0.562974	0.562999	1202	NRXN3	neurexin 3	9369	chr14:80330382:80330431:+
304	cg16372520	TATTTAAAGATTGTGGCTAATAGTAGAGTAGATACCCCTGGTATTTCCCAGAGCAGAGCT[CG]CATTCTGGGAATCTTAGGTCCATGTGACTTCCTGAGTCAGTGATTCACACTGAGAAAAGA	14	77939504	F	NRXN3	0.710588	0.0665899	0.0209534	2.31016	2.31187	1202	NRXN3	neurexin 3	9369	chr14:79433575:79433624:+
304	cg16372520	TATTTAAAGATTGTGGCTAATAGTAGAGTAGATACCCCTGGTATTTCCCAGAGCAGAGCT[CG]CATTCTGGGAATCTTAGGTCCATGTGACTTCCTGAGTCAGTGATTCACACTGAGAAAAGA	14	77939504	F	NRXN3	0.710588	0.0277201	0.336935	0.9605	0.960623	1202	NRXN3	neurexin 3	9369	chr14:79746679:79746728:+
305	cg16408970	CGGAGGGGGAAACAAAACTACAGCAAGACCACCTTGAGTACCTTGGGAAGGGCAGCCCCG[CG]ATCCCTAATAAATGAATTAGCATCTCAAGGAGGAGATCACTGCGGGGCTGATATTGATCA	10	29005590	F	BAMBI	4.02404	-0.0135141	0.639736	-0.468172	0.468186	1202	BAMBI	BMP and activin membrane bound inhibitor	25805	chr10:28971562:28971611:+
306	cg16466334	TCTATGTTGTCTCTATGCCTTGCTGTCTTGCCTGCCTCCTTGTAGGTCCAACCTCGGGAG[CG]CAGCTTTTAAAGAGTGACAGTGTTTGTTTGGATCACCCGCAGCTTGACTCATCCTTGCTT	11	102219568	F	MMP3	0.166685	-0.0111785	0.698634	-0.387249	0.387257	1202	MMP3	matrix metallopeptidase 3	4314	chr11:102706602:102706651:-
307	cg16543027	CTTAATCCCAGGTTTGTTTATCCAAGCAGTGGTGTCAGCTGCCTGGCCAAACCACACAGG[CG]CCTGGATCCTAGGAGACATAAACCAATCCTCCCACCCAAGCAAAGCCCCGTAGCAGCCCG	15	38386972	R	PLCB2	-4.28496	-0.0144192	0.617484	-0.499532	0.499549	1202	PLCB2	phospholipase C beta 2	5330	chr15:40580312:40580361:-
308	cg16612562	GCCGCCCGGGGTCCGAATTGGGGGGGGCGGCTGTGTGACCTTGGGCGAATCGCCGCACTG[CG]CTGGGTCTGCGCTCCGCATCCATCACAGGCAGACTCCTCAAGAGGCTCCAACCTTTTCTT	22	28042045	F	RASL10A;RASL10A	2.0809	0.0444978	0.1231	1.54247	1.54298	1202	RASL10A	RAS like family 10 member A	10633	chr22:29708987:29709036:-
308	cg16612562	GCCGCCCGGGGTCCGAATTGGGGGGGGCGGCTGTGTGACCTTGGGCGAATCGCCGCACTG[CG]CTGGGTCTGCGCTCCGCATCCATCACAGGCAGACTCCTCAAGAGGCTCCAACCTTTTCTT	22	28042045	F	RASL10A;RASL10A	2.0809	-0.0049842	0.862948	-0.172659	0.17266	1202	RASL10A	RAS like family 10 member A	10633	chr22:29709759:29709808:-
309	cg16648841	GGTAACTGCACAGGAGAAGGTGAACCAGTAAGTGGGCCATATGTCTCTGCAAAACTTGCA[CG]TAGGAATCACCTGCTGGGGAACTAAGACACTTTTATGTTTGCAGCAGAGGCTGTGTTAGA	1	57093273	F	C8A	6.09762	0.0653405	0.0234874	2.26669	2.26831	1202	C8A	complement C8 alpha chain	731	chr1:57383502:57383551:+
310	cg16713727	CCCAGGGTCCAGGCCCGCCCTCGGCTGGCAGGTGTGGGCACAGAGGCAGCTGGGATTGGT[CG]CAGCTGGCGGAGGCGCGTCCCAGGCTCCGGCAGACCGCTGGAACAGCTGAGCAGAGCAGG	1	15935307	R	SLC25A34	3.18797	-0.0346809	0.22956	-1.20186	1.2021	1202	SLC25A34	solute carrier family 25 member 34	284723	chr1:16067806:16067855:+
311	cg16718891	CCCCCCGCCTGCCGAGGGGGCTGGCGGGGGGGCATTCCTGGGTCCCTGGAACTCTGAGCC[CG]CGTCCCCCACCCCTAAGGGGCGTGGGGGGGGGGCGCACCCCTCCAACCCCCTTTCCCCAG	12	53099422	R	ITGA5	-4.41029	-0.0318453	0.269939	-1.10353	1.10371	1202	ITGA5	integrin subunit alpha 5	3678	chr12:54789099:54789148:-
312	cg16728114	AGCCTGGATTCTAGTGAAGCCCAATTCACCAGCCATTTGGTCTTAGTAAGGTCATTACCG[CG]CTCTAGGTTTGAGTCTCATTTGTAAAATGAAGGGAGTGGAGGGGCTTATAGAGCTCGAAC	1	154964417	R	C1orf66;ISG20L2;C1orf66	0.275799	0.0601841	0.036952	2.08736	2.08862	1202	ISG20L2	interferon stimulated exonuclease gene 20 like 2	81875	chr1:156692688:156692737:-
312	cg16728114	AGCCTGGATTCTAGTGAAGCCCAATTCACCAGCCATTTGGTCTTAGTAAGGTCATTACCG[CG]CTCTAGGTTTGAGTCTCATTTGTAAAATGAAGGGAGTGGAGGGGCTTATAGAGCTCGAAC	1	154964417	R	C1orf66;ISG20L2;C1orf66	0.275799	0.050292	0.0813502	1.74364	1.74437	1202	ISG20L2	interferon stimulated exonuclease gene 20 like 2	81875	chr6:23972825:23972874:+
312	cg16728114	AGCCTGGATTCTAGTGAAGCCCAATTCACCAGCCATTTGGTCTTAGTAAGGTCATTACCG[CG]CTCTAGGTTTGAGTCTCATTTGTAAAATGAAGGGAGTGGAGGGGCTTATAGAGCTCGAAC	1	154964417	R	C1orf66;ISG20L2;C1orf66	0.275799	0.0132693	0.645812	0.45969	0.459703	1202	ISG20L2	interferon stimulated exonuclease gene 20 like 2	81875	chr11:113691973:113692022:-
313	cg16743289	GTGCGCGCTATGTGACCTCTCAGGGGTCGCTGCCTTGGACGATCTGTAAAGCTGAGTGCG[CG]CTATGTGACCTCTCAGGGGTTGTTTCCAACCGTGTTGTTGACATCTTGAGCCTGCCAAGG	1	173234767	F	CACYBP;CACYBP	3.26574	0.00189407	0.947697	0.0656127	0.0656127	1202	CACYBP	calcyclin binding protein	27101	chr1:174968701:174968750:+
313	cg16743289	GTGCGCGCTATGTGACCTCTCAGGGGTCGCTGCCTTGGACGATCTGTAAAGCTGAGTGCG[CG]CTATGTGACCTCTCAGGGGTTGTTTCCAACCGTGTTGTTGACATCTTGAGCCTGCCAAGG	1	173234767	F	CACYBP;CACYBP	3.26574	0.0634622	0.027796	2.20135	2.20283	1202	CACYBP	calcyclin binding protein	27101	chr1:174969218:174969267:+
313	cg16743289	GTGCGCGCTATGTGACCTCTCAGGGGTCGCTGCCTTGGACGATCTGTAAAGCTGAGTGCG[CG]CTATGTGACCTCTCAGGGGTTGTTTCCAACCGTGTTGTTGACATCTTGAGCCTGCCAAGG	1	173234767	F	CACYBP;CACYBP	3.26574	0.00888519	0.758285	0.3078	0.307804	1202	CACYBP	calcyclin binding protein	27101	chr1:174981105:174981154:+
313	cg16743289	GTGCGCGCTATGTGACCTCTCAGGGGTCGCTGCCTTGGACGATCTGTAAAGCTGAGTGCG[CG]CTATGTGACCTCTCAGGGGTTGTTTCCAACCGTGTTGTTGACATCTTGAGCCTGCCAAGG	1	173234767	F	CACYBP;CACYBP	3.26574	0.0208242	0.470726	0.721474	0.721526	1202	CACYBP	calcyclin binding protein	27101	chr2:184472877:184472926:-
313	cg16743289	GTGCGCGCTATGTGACCTCTCAGGGGTCGCTGCCTTGGACGATCTGTAAAGCTGAGTGCG[CG]CTATGTGACCTCTCAGGGGTTGTTTCCAACCGTGTTGTTGACATCTTGAGCCTGCCAAGG	1	173234767	F	CACYBP;CACYBP	3.26574	-0.0270592	0.348587	-0.937586	0.9377	1202	CACYBP	calcyclin binding protein	27101	chr1:174973775:174973826:+
314	cg16816226	GAGCTAAAAGGTAGTATCCCACCCTCTCCATAAACAGACACCTAAGTTATAAAACTTATG[CG]CTCGATATGCAAAAATAGCTCGTTTTATACAGAAACGATCCTTTCCTTCTTTTCCTTATA	3	5203848	R	EDEM1	-0.761063	-0.0112896	0.695786	-0.391101	0.39111	1202	EDEM1	ER degradation enhancing alpha-mannosidase like protein 1	9695	chr3:5260981:5261030:+
315	cg16854606	GGCAGCTGGGGATGGGCAGGCTGCAGCGTGGGCAAGACGAGGTGGCTGCTGTGACTCTGC[CG]CTGAACCCTCAGGAAGTGATCCAGGGGATGTGTAAGGCTGTGCCCTTCGTTCAGGTGAGT	19	12941743	R	DAND5	12.7452	-0.0303264	0.293461	-1.05086	1.05102	1202	DAND5	DAN domain BMP antagonist family member 5	199699	chr19:13085276:13085325:+
316	cg16933388	GGTCAGTCGGGGCCTGCAGACCGTGACTCCGTCACGAACCCCAAATTCGCTTCTCCCCAA[CG]CTCGGGCCTGACTGCTCAGGAGGGGCTTATGTAACCTTAACCTGGTCCCTCCGCACAGGA	3	49567533	F	BSN	7.41635	0.0176552	0.540859	0.611659	0.61169	1202	BSN	bassoon presynaptic cytomatrix protein	8927	chr3:49708871:49708920:+
317	cg16984944	TTTCTTCAAATTAAATTGCTACAGCAGGAAATTACTGAACTGTGGCTCTTCTCCTACGTC[CG]CCTTCCCTATGTCAATTCCCATTTCCCTTGCTTTCTCCAATAGTTAGGACTGTAAATTCT	3	101462115	R	TBC1D23	-1.35998	-0.000257529	0.992884	-0.00892106	0.00892106	1202	TBC1D23	TBC1 domain family member 23	55773	chr3:100029374:100029386:+,chr3:100034943:100034979:+
318	cg17009433	GGACAGATGGATGGACGCTCGCGGGCAATGAATGGGCGCTGCGCTCAACCAAGACACTCG[CG]CAAAGTTGTGGCTCCACCCAAGGCACCTGCTCCGCACACTTTAAGCGGCGCCCTGGAGGC	9	6635686	F	GLDC;GLDC	17.3158	0.0157293	0.585891	0.544925	0.544948	1202	GLDC	glycine decarboxylase	2731	chr9:6532773:6532822:-
319	cg17038116	TATGCGATGATGTTTGTTTGCCCTTGACGCACTTACTCATGGATGGTACTTCTTCAGCCT[CG]TTAGACAGCCTGGTGATGGAGGATGAAGAAACCATGTGCTTTTCATTCAGTTCTGGACTT	1	153800029	R	ASH1L;LOC645676	-11.1656	0.0430198	0.136058	1.49117	1.49163	1202	ASH1L	ASH1 like histone lysine methyltransferase	55870	chr1:155306812:155306861:-
319	cg17038116	TATGCGATGATGTTTGTTTGCCCTTGACGCACTTACTCATGGATGGTACTTCTTCAGCCT[CG]TTAGACAGCCTGGTGATGGAGGATGAAGAAACCATGTGCTTTTCATTCAGTTCTGGACTT	1	153800029	R	ASH1L;LOC645676	-11.1656	0.0102442	0.722736	0.354882	0.354888	1202	LOC645676	ASH1L antisense RNA 1	645676	chr1:155533396:155533445:+
319	cg17038116	TATGCGATGATGTTTGTTTGCCCTTGACGCACTTACTCATGGATGGTACTTCTTCAGCCT[CG]TTAGACAGCCTGGTGATGGAGGATGAAGAAACCATGTGCTTTTCATTCAGTTCTGGACTT	1	153800029	R	ASH1L;LOC645676	-11.1656	0.016636	0.564476	0.57634	0.576367	1202	LOC645676	ASH1L antisense RNA 1	645676	chr1:155532807:155532833:+
319	cg17038116	TATGCGATGATGTTTGTTTGCCCTTGACGCACTTACTCATGGATGGTACTTCTTCAGCCT[CG]TTAGACAGCCTGGTGATGGAGGATGAAGAAACCATGTGCTTTTCATTCAGTTCTGGACTT	1	153800029	R	ASH1L;LOC645676	-11.1656	0.0165549	0.566375	0.573531	0.573557	1202	LOC645676	ASH1L antisense RNA 1	645676	chr1:155532328:155532377:+
319	cg17038116	TATGCGATGATGTTTGTTTGCCCTTGACGCACTTACTCATGGATGGTACTTCTTCAGCCT[CG]TTAGACAGCCTGGTGATGGAGGATGAAGAAACCATGTGCTTTTCATTCAGTTCTGGACTT	1	153800029	R	ASH1L;LOC645676	-11.1656	-0.0350635	0.224459	-1.21513	1.21538	1202	LOC645676	ASH1L antisense RNA 1	645676	chr1:155532050:155532077:+
319	cg17038116	TATGCGATGATGTTTGTTTGCCCTTGACGCACTTACTCATGGATGGTACTTCTTCAGCCT[CG]TTAGACAGCCTGGTGATGGAGGATGAAGAAACCATGTGCTTTTCATTCAGTTCTGGACTT	1	153800029	R	ASH1L;LOC645676	-11.1656	-0.00857297	0.766528	-0.296984	0.296987	1202	LOC645676	NA	7818	chr1:155533121:155533170:+
320	cg17129388	TGTGTGGGACAGTCAGGTCGGCAGGAGTGCATGAGAACGGTGTGGGCACACGTAAGTGCA[CG]ATCACACATACAAGTGAGCTTGAGAGTGTGTATTCCTGTGCACTGTGTGCACACCTGTGA	17	44926985	F	NGFR	9.67959	-0.0148667	0.606609	-0.515037	0.515056	1202	NGFR	nerve growth factor receptor	4804	chr17:47592067:47592116:+
321	cg17133388	GCAGAGTCCAATTATGTGTTTTCTGATAAAAGCATATGTTCATTGAAAACACTGGAAGAG[CG]GCATACTGGAATACTGGTTTATCTGGTGTATTTCGGGAGTTTACAGATCACGAAAGTTGC	3	123585417	F	FAM162A;CCDC58	-8.78666	0.157639	3.92906e-08	5.50668	5.52991	1202	CCDC58	coiled-coil domain containing 58	131076	chr3:122081815:122081829:-,chr3:122078732:122078766:-
321	cg17133388	GCAGAGTCCAATTATGTGTTTTCTGATAAAAGCATATGTTCATTGAAAACACTGGAAGAG[CG]GCATACTGGAATACTGGTTTATCTGGTGTATTTCGGGAGTTTACAGATCACGAAAGTTGC	3	123585417	F	FAM162A;CCDC58	-8.78666	-0.0198771	0.491145	-0.688655	0.688701	1202	FAM162A	family with sequence similarity 162 member A	26355	chr3:122128634:122128683:+
322	cg17324128	CCCTCCCCCGCCAGCCTGGCGCATTGCGGGCCTCGGGCTCATTGCTGAGAGGGGGCACTG[CG]CCTGGCACCTCTGTTAAGCAATTTAGGGGCTACAACCTGAGCAAGACAGATGAGCCCGGC	10	44775506	F	RASSF4	-4.04394	-0.0225475	0.4348	-0.7812	0.781266	1202	RASSF4	Ras association domain family member 4	83937	chr10:45490016:45490065:+
322	cg17324128	CCCTCCCCCGCCAGCCTGGCGCATTGCGGGCCTCGGGCTCATTGCTGAGAGGGGGCACTG[CG]CCTGGCACCTCTGTTAAGCAATTTAGGGGCTACAACCTGAGCAAGACAGATGAGCCCGGC	10	44775506	F	RASSF4	-4.04394	-0.00730077	0.800379	-0.252911	0.252913	1202	RASSF4	Ras association domain family member 4	83937	chr10:45479487:45479536:+
323	cg17431739	TATGTTGAGTGAAAGAAGCCAGACAAAATCAAGTACATATGGGATGATTCCATTTATGGA[CG]ACTCTAGAAAATGCAAACTAAAACAGATCAGTGTTTGGGCTGCGGATGAGTGGAGTTGGG	10	23424053	F	MSRB2	-0.762536	0.0408419	0.157039	1.41559	1.41598	1202	MSRB2	methionine sulfoxide reductase B2	22921	chr10:23409810:23409859:+
324	cg17526300	CCTACGAAGAGGTAGGGCTTGGCAAGGACCCACGGGGCGTGTCCTAGGACTCGGTGAGGG[CG]TGACCTCGGGCCAGGGGCGGGGAGAGAACCAGAGGGCGAAGTGGGAGGGCACAGGGGAGA	10	16518925	R	PTER;PTER	8.03828	-0.00456585	0.874352	-0.158167	0.158167	1202	PTER	phosphotriesterase related	9317	chr10:16555648:16555697:+
324	cg17526300	CCTACGAAGAGGTAGGGCTTGGCAAGGACCCACGGGGCGTGTCCTAGGACTCGGTGAGGG[CG]TGACCTCGGGCCAGGGGCGGGGAGAGAACCAGAGGGCGAAGTGGGAGGGCACAGGGGAGA	10	16518925	R	PTER;PTER	8.03828	-0.011637	0.686914	-0.403135	0.403144	1202	PTER	phosphotriesterase related	9317	chr10:16479438:16479487:+
324	cg17526300	CCTACGAAGAGGTAGGGCTTGGCAAGGACCCACGGGGCGTGTCCTAGGACTCGGTGAGGG[CG]TGACCTCGGGCCAGGGGCGGGGAGAGAACCAGAGGGCGAAGTGGGAGGGCACAGGGGAGA	10	16518925	R	PTER;PTER	8.03828	0.0459974	0.110957	1.59452	1.59508	1202	PTER	phosphotriesterase related	9317	chr10:16555561:16555610:+
325	cg17536848	CCTTCCGGTAGCTCGGTCACTAGGGTCAGTTTTATGACTCTCAGTGGACCCTAAACAGCA[CG]TAATATATGTATTTTTCACCGCCAAATATATCAAACACAATAATTCACCCTCCGTTCCCT	7	156379316	R	LMBR1	-4.83366	0.0562188	0.0513419	1.94953	1.95056	1202	LMBR1	limb development membrane protein 1	64327	chr7:156475825:156475874:-
326	cg17605084	ACCCATGAGCCAATTGCAGAGGCAACAGAAGACCAGTGCACCAACCAGGCTGGGTCCCTC[CG]CCAGAGGGTGTCACCATCTAAGCTGAAAGTGTTTGGGGAGATCAGACATTGCTGTCTGGT	12	53177758	R	NCKAP1L	-44.0094	0.057544	0.0460844	1.99559	1.99669	1202	NCKAP1L	NCK associated protein 1 like	3071	chr12:54936624:54936673:+
327	cg17627559	GGAAGCTGGGCTGTGCGTGTATGCGTCTACCATGTGGGGGTGCCTGTGAGTGTGCTGGGG[CG]TCTGCAGTGAAGGCCTCCTGAGACCACTCCACGGAAACACCGGGAATCCCTGCAGCTGAG	11	2280472	F	TSPAN32;C11orf21;C11orf21	1.06912	0.0325291	0.259783	1.12724	1.12744	1202	C11orf21	chromosome 11 open reading frame 21	29125	chr11:2317552:2317601:-
327	cg17627559	GGAAGCTGGGCTGTGCGTGTATGCGTCTACCATGTGGGGGTGCCTGTGAGTGTGCTGGGG[CG]TCTGCAGTGAAGGCCTCCTGAGACCACTCCACGGAAACACCGGGAATCCCTGCAGCTGAG	11	2280472	F	TSPAN32;C11orf21;C11orf21	1.06912	-0.00633512	0.826329	-0.219458	0.219459	1202	TSPAN32	tetraspanin 32	10077	chr11:2339272:2339321:+
327	cg17627559	GGAAGCTGGGCTGTGCGTGTATGCGTCTACCATGTGGGGGTGCCTGTGAGTGTGCTGGGG[CG]TCTGCAGTGAAGGCCTCCTGAGACCACTCCACGGAAACACCGGGAATCCCTGCAGCTGAG	11	2280472	F	TSPAN32;C11orf21;C11orf21	1.06912	-0.00217793	0.939873	-0.0754457	0.0754457	1202	TSPAN32	tetraspanin 32	10077	chr11:2323395:2323444:+
327	cg17627559	GGAAGCTGGGCTGTGCGTGTATGCGTCTACCATGTGGGGGTGCCTGTGAGTGTGCTGGGG[CG]TCTGCAGTGAAGGCCTCCTGAGACCACTCCACGGAAACACCGGGAATCCCTGCAGCTGAG	11	2280472	F	TSPAN32;C11orf21;C11orf21	1.06912	0.0286285	0.321336	0.99199	0.992125	1202	TSPAN32	tetraspanin 32	10077	chr11:2339119:2339168:+
328	cg17641104	GCGTCGCTTTCACACTCGGCGGCTGCGGATTGACGCCTCCGCCTGTTCCCCGGAGGAGAG[CG]AGTGCAAGAGAAAAAACACTTTTATTGAAACGATCCAACCAGCGGCGGCGGAGAAAAGCG	12	95318378	F	CDK17;CDK17;CDK17;CDK17	-9.92605	0.0668119	0.0205289	2.31789	2.31962	1202	CDK17	cyclin dependent kinase 17	5128	chr12:96672272:96672321:-
329	cg17726022	TCCGGGGTTTTTACCCTCGGCAGTTTGATGTCCTTTGTGTCAAGGTCTGGCTGCGGAGGC[CG]GGAAAATGTGGCCCCCGTCAGTAAGGGTTGGGCAGGGAGCTTGGCGTGGCCTGGCGGATT	12	44948688	R	SLC38A1;SLC38A1;SLC38A1	20.188	0.0205257	0.47711	0.711132	0.711182	1202	SLC38A1	solute carrier family 38 member 1	81539	chr12:46662324:46662373:-
329	cg17726022	TCCGGGGTTTTTACCCTCGGCAGTTTGATGTCCTTTGTGTCAAGGTCTGGCTGCGGAGGC[CG]GGAAAATGTGGCCCCCGTCAGTAAGGGTTGGGCAGGGAGCTTGGCGTGGCCTGGCGGATT	12	44948688	R	SLC38A1;SLC38A1;SLC38A1	20.188	-0.164386	9.90404e-09	-5.74665	5.77305	1202	SLC38A1	solute carrier family 38 member 1	81539	chr12:46581917:46581966:-
330	cg17749443	GCGTTACTTGCAGGATGCAGGAGTGATGCGATCAGAGCCAGCCGGAACCGAGTTCCGTTA[CG]CACTACAGGACTGACCTGGGCCTGACAACCCACTGCCGGAGTTCGGATCGCATCACTGCC	9	114859011	F	ZFP37	6.46858	-0.265907	6.67853e-21	-9.43808	9.55528	1202	ZFP37	ZFP37 zinc finger protein	7539	chr9:115804185:115804234:-
333	cg17896249	AGGCTGGACATTTGCTACTGGTCCCTGAAGTTTTGCGGCTGCACCCACAGACAGCAATAG[CG]CCACGTTCCCTGGAAGGCGCACGGGACGGAAGCGGAAGCAGTAACGCTGGCTCCGGCTGC	16	65783488	R	E2F4	18.01	0.0622703	0.0308695	2.1599	2.1613	1202	E2F4	E2F transcription factor 4	1874	chr16:67232606:67232655:+
334	cg17903544	GGAGATGGCAACAGGGCAAGCGTCCAGCAATGGGTAAGCGGTGGGGTCGGTGCACGCAGG[CG]TCCAGCAATGGGTAAGCGGTGGGGTCGGTCCACCCAGGGAGCGCTGGTCCCCCTGGAAGG	12	131796847	R	PGAM5;PGAM5;PGAM5	0.05859	-0.00734472	0.799203	-0.254433	0.254436	1202	PGAM5	PGAM family member 5, mitochondrial serine/threonine protein phosphatase	192111	chr12:133291478:133291527:+
334	cg17903544	GGAGATGGCAACAGGGCAAGCGTCCAGCAATGGGTAAGCGGTGGGGTCGGTGCACGCAGG[CG]TCCAGCAATGGGTAAGCGGTGGGGTCGGTCCACCCAGGGAGCGCTGGTCCCCCTGGAAGG	12	131796847	R	PGAM5;PGAM5;PGAM5	0.05859	0.00594111	0.836974	0.205808	0.20581	1202	PGAM5	PGAM family member 5, mitochondrial serine/threonine protein phosphatase	192111	chr12:133298693:133298742:+
334	cg17903544	GGAGATGGCAACAGGGCAAGCGTCCAGCAATGGGTAAGCGGTGGGGTCGGTGCACGCAGG[CG]TCCAGCAATGGGTAAGCGGTGGGGTCGGTCCACCCAGGGAGCGCTGGTCCCCCTGGAAGG	12	131796847	R	PGAM5;PGAM5;PGAM5	0.05859	-0.0226465	0.432785	-0.784631	0.784698	1202	PGAM5	PGAM family member 5, mitochondrial serine/threonine protein phosphatase	192111	chr12:133297771:133297820:+
334	cg17903544	GGAGATGGCAACAGGGCAAGCGTCCAGCAATGGGTAAGCGGTGGGGTCGGTGCACGCAGG[CG]TCCAGCAATGGGTAAGCGGTGGGGTCGGTCCACCCAGGGAGCGCTGGTCCCCCTGGAAGG	12	131796847	R	PGAM5;PGAM5;PGAM5	0.05859	-0.00781085	0.786758	-0.270581	0.270584	1202	PGAM5	PGAM family member 5, mitochondrial serine/threonine protein phosphatase	192111	chr12:133295526:133295575:+
335	cg17923358	GGAGGTGCTGCGGTACCTACCATGGTATTCTTGTCCCGGAACGTAGTAGGTGGGGTTGCC[CG]CAATATGCAGGGAAATGAGCACCTCGCCCTGCTCCCCATCCCCTTCCAGCTCCCCGTGGT	7	103416854	R	RELN;RELN	0.0248083	0.0323055	0.263075	1.11948	1.11968	1202	RELN	reelin	5649	chr7:103112290:103112339:-
335	cg17923358	GGAGGTGCTGCGGTACCTACCATGGTATTCTTGTCCCGGAACGTAGTAGGTGGGGTTGCC[CG]CAATATGCAGGGAAATGAGCACCTCGCCCTGCTCCCCATCCCCTTCCAGCTCCCCGTGGT	7	103416854	R	RELN;RELN	0.0248083	0.0108772	0.706373	0.376814	0.376821	1202	RELN	reelin	5649	chr7:103124100:103124115:-,chr7:103123385:103123418:-
336	cg17940013	GCCTCTGGGAGGGCAAGACCGGGAGGGGTCGGCCTGTGTCGGGGGCTCCTGGAAAAGCAG[CG]CCACCGCCACCCACCTGACGACATGGAAGGCCCAAAGCAGGCGATCTGTGCGAGGCCCGC	1	9111275	F	GPR157	-6.19517	0.0937143	0.00114257	3.25591	3.26071	1202	GPR157	G protein-coupled receptor 157	80045	chr1:9164502:9164551:-
337	cg17966192	CTGGCAGATGTTTGTACTGGGAGATTCAGATCCATCCAGGCCCCCACTGTTAATAGCCCA[CG]GGAAAGTCCCTGCAGTCTCTCAGGGAAGTCATTCTGTGTAGAATCTGTAATTTCACAGGC	2	108360548	F	SULT1C4	-0.814305	-0.0207459	0.472396	-0.718762	0.718814	1202	SULT1C4	sulfotransferase family 1C member 4	27233	chr2:109003776:109003825:+
338	cg18001427	AGCTGGGGCTCGCCTGTTGGGAGCCGCGTCCGCCGGTGTTGGTGTCTGCACTTGGAAGGA[CG]TAGGGAATGCGTTGTCCCTGCTAGGTACTTTTCAGTCGCAGAGTTCTCTTCTTCTTCTTT	21	29313655	F	RWDD2B	-1.64972	-0.0446774	0.121593	-1.5487	1.54922	1202	RWDD2B	RWD domain containing 2B	10069	chr21:30378398:30378447:-
339	cg18003795	CTTGGTGTTCAGCACCAGCCGCCCCCCCAGCCGCATCATCTTTTCTTTCAACAACAGATG[CG]CCCGTGTTTCATCTATGGATAGAGCTGAGCCGAAGAAAGACATTGCCACAGCCAACAGCA	22	16070463	F	CECR1	-6.99392	0.019895	0.490756	0.689273	0.689319	1202	CECR1	cat eye syndrome chromosome region, candidate 1	51816	chr22:17687975:17688024:-
339	cg18003795	CTTGGTGTTCAGCACCAGCCGCCCCCCCAGCCGCATCATCTTTTCTTTCAACAACAGATG[CG]CCCGTGTTTCATCTATGGATAGAGCTGAGCCGAAGAAAGACATTGCCACAGCCAACAGCA	22	16070463	F	CECR1	-6.99392	0.0224708	0.436364	0.778542	0.778608	1202	CECR1	cat eye syndrome chromosome region, candidate 1	51816	chr22:17660389:17660438:-
339	cg18003795	CTTGGTGTTCAGCACCAGCCGCCCCCCCAGCCGCATCATCTTTTCTTTCAACAACAGATG[CG]CCCGTGTTTCATCTATGGATAGAGCTGAGCCGAAGAAAGACATTGCCACAGCCAACAGCA	22	16070463	F	CECR1	-6.99392	0.0134215	0.642033	0.464962	0.464976	1202	CECR1	cat eye syndrome chromosome region, candidate 1	51816	chr22:17680469:17680518:-
340	cg18117393	TGATAGTATTTTCTACTGTCCTATACACATCAGGCAAGACTTCATGGAGAGCACTGAACA[CG]TACTCACTATGTGCCTAGCATTGTTGTTAATCACTTTACATGAATTAGTTCATTTAATTC	1	181027885	R	NPL	11.5323	0.0374202	0.194818	1.29688	1.29718	1202	NPL	N-acetylneuraminate pyruvate lyase	80896	chr1:182798028:182798077:+
340	cg18117393	TGATAGTATTTTCTACTGTCCTATACACATCAGGCAAGACTTCATGGAGAGCACTGAACA[CG]TACTCACTATGTGCCTAGCATTGTTGTTAATCACTTTACATGAATTAGTTCATTTAATTC	1	181027885	R	NPL	11.5323	0.0165832	0.56571	0.574513	0.57454	1202	NPL	N-acetylneuraminate pyruvate lyase	80896	chr1:182798331:182798380:+
341	cg18241647	CAAGAGCGACCCTCGTTCTTCACACGAGGAGAAGAAATGGACACGTGATTGACCATTAGG[CG]CCACCAGGGCCAAACTATCTTATGGAAGGAGGAAAAGAAGCACAGAAAGGGCATGAAATT	20	43186761	F	WFDC12	0.833494	-0.00521241	0.856739	-0.180565	0.180566	1202	WFDC12	WAP four-disulfide core domain 12	128488	chr20:43752310:43752359:-
341	cg18241647	CAAGAGCGACCCTCGTTCTTCACACGAGGAGAAGAAATGGACACGTGATTGACCATTAGG[CG]CCACCAGGGCCAAACTATCTTATGGAAGGAGGAAAAGAAGCACAGAAAGGGCATGAAATT	20	43186761	F	WFDC12	0.833494	-0.00985596	0.732834	-0.341432	0.341437	1202	WFDC12	WAP four-disulfide core domain 12	128488	chr20:43752519:43752568:-
342	cg18267374	GGGGCCCTGGCCCGGGACCAGCGCCGCGGCTATAAATGGGCTGCGGCGAGGCCGGCAGAA[CG]CTGTGACAGCCACACGCCCCAAGGCCTCCAAGATGAGCTACACGTTGGACTCGCTGGGCA	8	24827178	F	NEFM;NEFM;NEFM	13.3261	0.043386	0.132754	1.50388	1.50435	1202	NEFM	neurofilament, medium polypeptide	4741	chr8:24776254:24776303:+
343	cg18384097	TCACCCCCGTCTTGGGGACATCAGGTCTGTGAGCACCCATACCCCAGCCAGGCACTGTGG[CG]CCCCACTCGCCCTCCCGCACTCCCTCCTAGAGATGCCCTCTTATATCCCCGGAGTTCGCA	1	200396189	R	PTPN7;PTPN7	-0.96041	-0.0170932	0.553821	-0.592182	0.592211	1202	PTPN7	protein tyrosine phosphatase, non-receptor type 7	5778	chr1:202128662:202128711:-
343	cg18384097	TCACCCCCGTCTTGGGGACATCAGGTCTGTGAGCACCCATACCCCAGCCAGGCACTGTGG[CG]CCCCACTCGCCCTCCCGCACTCCCTCCTAGAGATGCCCTCTTATATCCCCGGAGTTCGCA	1	200396189	R	PTPN7;PTPN7	-0.96041	-0.00791582	0.783962	-0.274218	0.274221	1202	PTPN7	protein tyrosine phosphatase, non-receptor type 7	5778	chr1:202116363:202116412:-
344	cg18392482	AGCAAGGGAAGTTGGATGAGAATTTGAATCCAAAGCGTGCCATGGGACCACAATTGCACA[CG]ATCAATGAGTCTCACAAACTGACCACGGCTTATCTGAGGCAGTTTAGGGTTGTGCAAGAG	12	94862142	F	AMDHD1	-1.19639	-0.246979	3.6641e-18	-8.73621	8.82912	1202	AMDHD1	amidohydrolase domain containing 1	144193	chr12:96362185:96362234:+
345	cg18468844	AAAAGACGAGATGACAAGACACAGACAGCGAGCATGTGCCTGTGCACATTTGGGTCTGTG[CG]TCTCTGGATGGGGGTGAGAGAGAAAATAAAAGAAGGGGAGTGGAGGAAAGAGAATGCCCG	1	28376307	R	PTAFR;PTAFR;PTAFR;PTAFR	-0.514411	-0.0435626	0.131182	-1.51001	1.51049	1202	PTAFR	platelet activating factor receptor	5724	chr1:28476170:28476219:-
346	cg18587364	AGGTTAAACGGCACTGACCATGCTGAGCCACAGCCGGTAAAGATGGCGGTGGCACACTGA[CG]TCACTTCCGCTCCGAGCCTCCGGCCGGGTGGGGCTCCAGGGCTTGAGTTTCAGGCACGTA	19	9646779	R	ZNF562;ZNF562;ZNF562	-0.137735	0.0403967	0.161614	1.40014	1.40053	1202	ZNF562	zinc finger protein 562	54811	chr19:9764454:9764503:-
346	cg18587364	AGGTTAAACGGCACTGACCATGCTGAGCCACAGCCGGTAAAGATGGCGGTGGCACACTGA[CG]TCACTTCCGCTCCGAGCCTCCGGCCGGGTGGGGCTCCAGGGCTTGAGTTTCAGGCACGTA	19	9646779	R	ZNF562;ZNF562;ZNF562	-0.137735	-0.0605085	0.035944	-2.09864	2.09992	1202	ZNF562	zinc finger protein 562	54811	chr19:9759408:9759457:-
347	cg18691434	AAGCCCACGTGAGAGGGCAGGACGCCTGAGAGCTTGAGGCCACACGAGGCTGTGGAGCGG[CG]TGACTCAAACGTGGCGCGCATCAGCTCGCACACTTCCAAACCTCGCGATAGCTACTGGCC	7	99613361	R	STAG3;GPC2	4.54397	-0.0234735	0.416167	-0.813295	0.81337	1202	GPC2	glypican 2	221914	chr7:99767391:99767440:-
347	cg18691434	AAGCCCACGTGAGAGGGCAGGACGCCTGAGAGCTTGAGGCCACACGAGGCTGTGGAGCGG[CG]TGACTCAAACGTGGCGCGCATCAGCTCGCACACTTCCAAACCTCGCGATAGCTACTGGCC	7	99613361	R	STAG3;GPC2	4.54397	-0.0222851	0.440166	-0.772106	0.77217	1202	STAG3	stromal antigen 3	10734	chr7:99811649:99811698:+
348	cg18693704	GACCCAGGCGACTGACATGTTCCTCTCCTCTCAGCTGAAAAGCTTTGCTAGCTCTGTCTA[CG]CATAAAGTAAGGTTAAACACAGATTTTGCCCCGAAGGGCATTAATTAGGGACCAATTTAC	16	65288814	F	CMTM4;CMTM4	-13.8096	0.0336666	0.24348	1.16669	1.16691	1202	CMTM4	CKLF like MARVEL transmembrane domain containing 4	146223	chr16:66648817:66648866:-
348	cg18693704	GACCCAGGCGACTGACATGTTCCTCTCCTCTCAGCTGAAAAGCTTTGCTAGCTCTGTCTA[CG]CATAAAGTAAGGTTAAACACAGATTTTGCCCCGAAGGGCATTAATTAGGGACCAATTTAC	16	65288814	F	CMTM4;CMTM4	-13.8096	0.0239436	0.406892	0.829588	0.829668	1202	CMTM4	CKLF like MARVEL transmembrane domain containing 4	146223	chr16:66648944:66648993:-
348	cg18693704	GACCCAGGCGACTGACATGTTCCTCTCCTCTCAGCTGAAAAGCTTTGCTAGCTCTGTCTA[CG]CATAAAGTAAGGTTAAACACAGATTTTGCCCCGAAGGGCATTAATTAGGGACCAATTTAC	16	65288814	F	CMTM4;CMTM4	-13.8096	-0.00119843	0.966892	-0.0415147	0.0415147	1202	CMTM4	NA	NA	chr16:66670586:66670635:-
348	cg18693704	GACCCAGGCGACTGACATGTTCCTCTCCTCTCAGCTGAAAAGCTTTGCTAGCTCTGTCTA[CG]CATAAAGTAAGGTTAAACACAGATTTTGCCCCGAAGGGCATTAATTAGGGACCAATTTAC	16	65288814	F	CMTM4;CMTM4	-13.8096	-0.00510418	0.859682	-0.176816	0.176816	1202	CMTM4	CKLF like MARVEL transmembrane domain containing 4	146223	chr16:66655691:66655740:-
348	cg18693704	GACCCAGGCGACTGACATGTTCCTCTCCTCTCAGCTGAAAAGCTTTGCTAGCTCTGTCTA[CG]CATAAAGTAAGGTTAAACACAGATTTTGCCCCGAAGGGCATTAATTAGGGACCAATTTAC	16	65288814	F	CMTM4;CMTM4	-13.8096	0.0366395	0.204302	1.2698	1.27008	1202	CMTM4	CKLF like MARVEL transmembrane domain containing 4	146223	chr16:66650976:66651025:-
349	cg18732541	CTGGAGGGAGGAAGGTGTGGGGGGACCCAGGGGTCCTGTCTCCAAGCCTGGTTGCTCTTA[CG]CGAAAAGTTGGGACACTGAGGTGTCACAGCTTCTCTTTTGAAATGGAGAGGAGGTAGGAG	19	7647602	R	C19orf59	0.797614	-0.0634997	0.0277035	-2.20266	2.20414	1202	C19orf59	mast cell expressed membrane protein 1	199675	chr19:7744534:7744583:+
350	cg18771300	TGCCGTGGGGAAAACCTGCCTGCTGATGAGCTACGCCAACGACGCCTTCCCAGAGGAATA[CG]TGCCCACTGTGTTTGACCACTATGCAGGTAAGAAAAAGTGGGAAACTCTCTGCATCCAGA	14	62741490	F	RHOJ	-0.430534	-0.00656999	0.819999	-0.227594	0.227596	1202	RHOJ	ras homolog family member J	57381	chr14:63758044:63758093:+
350	cg18771300	TGCCGTGGGGAAAACCTGCCTGCTGATGAGCTACGCCAACGACGCCTTCCCAGAGGAATA[CG]TGCCCACTGTGTTTGACCACTATGCAGGTAAGAAAAAGTGGGAAACTCTCTGCATCCAGA	14	62741490	F	RHOJ	-0.430534	0.0343426	0.234138	1.19013	1.19037	1202	RHOJ	ras homolog family member J	57381	chr14:63758316:63758365:+
351	cg18809289	CTGGCAGCCAGTGGTTCGCCGGCACTGACGACTACATCTACCTCAGCCTCGTGGGCTCGG[CG]GGCTGCAGCGAGAAGCACCTGCTGGACAAGCCCTTCTACAACGACTTCGAGCGTGGCGCG	10	45189822	F	ALOX5	0.653579	0.052768	0.0674252	1.82963	1.83049	1202	ALOX5	arachidonate 5-lipoxygenase	240	chr10:45941345:45941394:+
351	cg18809289	CTGGCAGCCAGTGGTTCGCCGGCACTGACGACTACATCTACCTCAGCCTCGTGGGCTCGG[CG]GGCTGCAGCGAGAAGCACCTGCTGGACAAGCCCTTCTACAACGACTTCGAGCGTGGCGCG	10	45189822	F	ALOX5	0.653579	0.0380622	0.187264	1.31915	1.31947	1202	ALOX5	arachidonate 5-lipoxygenase	240	chr10:45869629:45869678:+
351	cg18809289	CTGGCAGCCAGTGGTTCGCCGGCACTGACGACTACATCTACCTCAGCCTCGTGGGCTCGG[CG]GGCTGCAGCGAGAAGCACCTGCTGGACAAGCCCTTCTACAACGACTTCGAGCGTGGCGCG	10	45189822	F	ALOX5	0.653579	-0.0703347	0.0147289	-2.44049	2.44251	1202	ALOX5	NA	NA	chr10:45871162:45871211:+
351	cg18809289	CTGGCAGCCAGTGGTTCGCCGGCACTGACGACTACATCTACCTCAGCCTCGTGGGCTCGG[CG]GGCTGCAGCGAGAAGCACCTGCTGGACAAGCCCTTCTACAACGACTTCGAGCGTGGCGCG	10	45189822	F	ALOX5	0.653579	-0.000662193	0.981703	-0.0229391	0.0229391	1202	ALOX5	NA	NA	chr10:45875521:45875570:+
352	cg18881501	TCAGTGCGTGTTAGCGAGCAGCGCCGGGAGATAGCTGTCACCGCCGCCCGCTCACAGATG[CG]TAGACTGAGGCTCAGGTGTCACCACCTGACCAAGGCTAGTTCCGCTACAAAGCTGCCGAC	17	21127969	F	MAP2K3	-2.02213	0.170513	2.69567e-09	5.96501	5.99453	1202	MAP2K3	mitogen-activated protein kinase kinase 3	5606	chr17:21204240:21204289:+
352	cg18881501	TCAGTGCGTGTTAGCGAGCAGCGCCGGGAGATAGCTGTCACCGCCGCCCGCTCACAGATG[CG]TAGACTGAGGCTCAGGTGTCACCACCTGACCAAGGCTAGTTCCGCTACAAAGCTGCCGAC	17	21127969	F	MAP2K3	-2.02213	0.0360138	0.212141	1.24809	1.24836	1202	MAP2K3	mitogen-activated protein kinase kinase 3	5606	chr17:21218459:21218508:+
352	cg18881501	TCAGTGCGTGTTAGCGAGCAGCGCCGGGAGATAGCTGTCACCGCCGCCCGCTCACAGATG[CG]TAGACTGAGGCTCAGGTGTCACCACCTGACCAAGGCTAGTTCCGCTACAAAGCTGCCGAC	17	21127969	F	MAP2K3	-2.02213	-0.0133645	0.643447	-0.462989	0.463002	1202	MAP2K3	mitogen-activated protein kinase kinase 3	5606	chr17:21188188:21188237:+
352	cg18881501	TCAGTGCGTGTTAGCGAGCAGCGCCGGGAGATAGCTGTCACCGCCGCCCGCTCACAGATG[CG]TAGACTGAGGCTCAGGTGTCACCACCTGACCAAGGCTAGTTCCGCTACAAAGCTGCCGAC	17	21127969	F	MAP2K3	-2.02213	0.00963283	0.738659	0.333701	0.333707	1202	MAP2K3	NA	NA	chr17:21201450:21201502:+
352	cg18881501	TCAGTGCGTGTTAGCGAGCAGCGCCGGGAGATAGCTGTCACCGCCGCCCGCTCACAGATG[CG]TAGACTGAGGCTCAGGTGTCACCACCTGACCAAGGCTAGTTCCGCTACAAAGCTGCCGAC	17	21127969	F	MAP2K3	-2.02213	0.0551306	0.0560258	1.91172	1.91269	1202	MAP2K3	mitogen-activated protein kinase kinase 3	5606	chr17:21218456:21218505:+
352	cg18881501	TCAGTGCGTGTTAGCGAGCAGCGCCGGGAGATAGCTGTCACCGCCGCCCGCTCACAGATG[CG]TAGACTGAGGCTCAGGTGTCACCACCTGACCAAGGCTAGTTCCGCTACAAAGCTGCCGAC	17	21127969	F	MAP2K3	-2.02213	0.0214444	0.457611	0.74297	0.743027	1202	MAP2K3	NA	NA	chr17:21208896:21208938:+
352	cg18881501	TCAGTGCGTGTTAGCGAGCAGCGCCGGGAGATAGCTGTCACCGCCGCCCGCTCACAGATG[CG]TAGACTGAGGCTCAGGTGTCACCACCTGACCAAGGCTAGTTCCGCTACAAAGCTGCCGAC	17	21127969	F	MAP2K3	-2.02213	0.0365769	0.205076	1.26763	1.26791	1202	MAP2K3	mitogen-activated protein kinase kinase 3	5606	chr17:21202193:21202238:+,chr17:21203857:21203860:+
352	cg18881501	TCAGTGCGTGTTAGCGAGCAGCGCCGGGAGATAGCTGTCACCGCCGCCCGCTCACAGATG[CG]TAGACTGAGGCTCAGGTGTCACCACCTGACCAAGGCTAGTTCCGCTACAAAGCTGCCGAC	17	21127969	F	MAP2K3	-2.02213	0.0356364	0.216973	1.23501	1.23527	1202	MAP2K3	NA	5606	chr17:21194823:21194859:+,chr17:21198987:21198999:+
352	cg18881501	TCAGTGCGTGTTAGCGAGCAGCGCCGGGAGATAGCTGTCACCGCCGCCCGCTCACAGATG[CG]TAGACTGAGGCTCAGGTGTCACCACCTGACCAAGGCTAGTTCCGCTACAAAGCTGCCGAC	17	21127969	F	MAP2K3	-2.02213	0.0361017	0.211027	1.25114	1.25142	1202	MAP2K3	mitogen-activated protein kinase kinase 3	5606	chr17:21202208:21202238:+,chr17:21203857:21203875:+
353	cg18996776	TGGGTGGAAAAGGAAAGGGCCCATTAGACGAATCTGATTCATCTTCTGTGACTAAGCACC[CG]CAACAGTTAGGAATTTAGGCAGAGCTGGTGATCCTGGGACAATAGCACTTCCTAGGTAAT	3	161766697	R	KPNA4	33.0506	-0.0170722	0.554307	-0.591456	0.591485	1202	KPNA4	karyopherin subunit alpha 4	3840	chr3:160218251:160218300:-
353	cg18996776	TGGGTGGAAAAGGAAAGGGCCCATTAGACGAATCTGATTCATCTTCTGTGACTAAGCACC[CG]CAACAGTTAGGAATTTAGGCAGAGCTGGTGATCCTGGGACAATAGCACTTCCTAGGTAAT	3	161766697	R	KPNA4	33.0506	0.0435651	0.13116	1.5101	1.51057	1202	KPNA4	karyopherin subunit alpha 4	3840	chr6:86000348:86000385:+
353	cg18996776	TGGGTGGAAAAGGAAAGGGCCCATTAGACGAATCTGATTCATCTTCTGTGACTAAGCACC[CG]CAACAGTTAGGAATTTAGGCAGAGCTGGTGATCCTGGGACAATAGCACTTCCTAGGTAAT	3	161766697	R	KPNA4	33.0506	-0.0262916	0.362434	-0.910979	0.911084	1202	KPNA4	karyopherin subunit alpha 4	3840	chr6:86002395:86002444:+
353	cg18996776	TGGGTGGAAAAGGAAAGGGCCCATTAGACGAATCTGATTCATCTTCTGTGACTAAGCACC[CG]CAACAGTTAGGAATTTAGGCAGAGCTGGTGATCCTGGGACAATAGCACTTCCTAGGTAAT	3	161766697	R	KPNA4	33.0506	-0.0251672	0.383332	-0.872	0.872092	1202	KPNA4	karyopherin subunit alpha 4	3840	chr6:86002220:86002269:+
354	cg19008809	GCGCGCGTGCCGCCGCCGCGGGCACTGCGCCCGTTTGCCTGCCCCTCGTCGGGGATCGGG[CG]CTCCCTCTGAGACCTGAAAGGGCACCCAAGTGCCCCCTGTCTGCGAAGTCCGGCGCGGGC	3	53055722	F	SFMBT1;SFMBT1;SFMBT1	12.12	-0.11191	0.000101039	-3.89298	3.90118	1202	SFMBT1	Scm-like with four mbt domains 1	51460	chr3:52939000:52939049:-
354	cg19008809	GCGCGCGTGCCGCCGCCGCGGGCACTGCGCCCGTTTGCCTGCCCCTCGTCGGGGATCGGG[CG]CTCCCTCTGAGACCTGAAAGGGCACCCAAGTGCCCCCTGTCTGCGAAGTCCGGCGCGGGC	3	53055722	F	SFMBT1;SFMBT1;SFMBT1	12.12	-0.0889196	0.00203048	-3.08842	3.09251	1202	SFMBT1	Scm-like with four mbt domains 1	51460	chr3:52940153:52940202:-
354	cg19008809	GCGCGCGTGCCGCCGCCGCGGGCACTGCGCCCGTTTGCCTGCCCCTCGTCGGGGATCGGG[CG]CTCCCTCTGAGACCTGAAAGGGCACCCAAGTGCCCCCTGTCTGCGAAGTCCGGCGCGGGC	3	53055722	F	SFMBT1;SFMBT1;SFMBT1	12.12	0.0369177	0.200884	1.27945	1.27974	1202	SFMBT1	Scm-like with four mbt domains 1	51460	chr3:53078967:53079016:-
355	cg19028160	GACCCCCGGCAGGGACGTTTTTCTGCAAACTCACAGCATTTGACAAAGTTACATAAACGG[CG]CCCGGCCGGCCCCGGCGCCCGCCCGCCCCCGCCCTCACTCCCGGCGGCCCGGAGCCCACC	2	239986947	R	HDAC4	-2.24287	0.0575314	0.0461321	1.99515	1.99625	1202	HDAC4	histone deacetylase 4	9759	chr2:239970512:239970561:-
356	cg19104072	CGTGCGTGGCCAGGATCACATCGTTGGGGTCCATGGTGGTCTTCAGCAGGCCCCTGTAGA[CG]CGGTAATCGCCGCTAGCGTCCAGGACGCCTCCAGAGGCCAGCGCGGTGCGGAGCTGCGCC	11	65871352	R	B3GNT1	-21.5987	-0.048368	0.093709	-1.67683	1.67748	1202	B3GNT1	beta-1,4-glucuronyltransferase 1	11041	chr11:66112927:66112976:-
356	cg19104072	CGTGCGTGGCCAGGATCACATCGTTGGGGTCCATGGTGGTCTTCAGCAGGCCCCTGTAGA[CG]CGGTAATCGCCGCTAGCGTCCAGGACGCCTCCAGAGGCCAGCGCGGTGCGGAGCTGCGCC	11	65871352	R	B3GNT1	-21.5987	0.0406712	0.158782	1.40967	1.41006	1202	B3GNT1	beta-1,4-glucuronyltransferase 1	11041	chr11:66113301:66113350:-
357	cg19149785	GAGCCTCAGGGGCGGAGTCTTAGTGTCCAGAGGGGAGTCAGGGCAGCTGGAGGTCCAGGG[CG]GGAACCATTGAGGCTGGGACCCTACGAGAACCCCCTACCCCGTGCCCTTCGGCCTCTCTT	19	56198085	F	KLK9;KLK8;KLK8;KLK8;KLK8	-1.87511	-0.0141818	0.623289	-0.491305	0.491322	1202	KLK8	kallikrein related peptidase 8	11202	chr19:51503873:51503922:-
357	cg19149785	GAGCCTCAGGGGCGGAGTCTTAGTGTCCAGAGGGGAGTCAGGGCAGCTGGAGGTCCAGGG[CG]GGAACCATTGAGGCTGGGACCCTACGAGAACCCCCTACCCCGTGCCCTTCGGCCTCTCTT	19	56198085	F	KLK9;KLK8;KLK8;KLK8;KLK8	-1.87511	0.0184499	0.522793	0.639197	0.639234	1202	KLK8	kallikrein related peptidase 8	11202	chr19:51504788:51504827:-,chr19:51504422:51504431:-
357	cg19149785	GAGCCTCAGGGGCGGAGTCTTAGTGTCCAGAGGGGAGTCAGGGCAGCTGGAGGTCCAGGG[CG]GGAACCATTGAGGCTGGGACCCTACGAGAACCCCCTACCCCGTGCCCTTCGGCCTCTCTT	19	56198085	F	KLK9;KLK8;KLK8;KLK8;KLK8	-1.87511	-0.0168589	0.559268	-0.584064	0.584092	1202	KLK9	kallikrein related peptidase 9	284366	chr19:51506035:51506084:-
358	cg19287114	GGAAGCAATCCGGCCCCTTTTTGGCAGCGAGTTGGCCCGGTCTTTGGCTGCCTCAGACCG[CG]TTGCCCTCCAGCCTCGAGGCAGAGAGCTGCCTCGGTGCCACAGCTAAATAAGCCCGGCGC	9	107046432	F	SLC44A1	-36.4938	0.0189896	0.510704	0.657898	0.657938	1202	SLC44A1	solute carrier family 44 member 1	23446	chr9:108153485:108153534:+
358	cg19287114	GGAAGCAATCCGGCCCCTTTTTGGCAGCGAGTTGGCCCGGTCTTTGGCTGCCTCAGACCG[CG]TTGCCCTCCAGCCTCGAGGCAGAGAGCTGCCTCGGTGCCACAGCTAAATAAGCCCGGCGC	9	107046432	F	SLC44A1	-36.4938	-0.00148754	0.958912	-0.0515298	0.0515298	1202	SLC44A1	solute carrier family 44 member 1	23446	chr9:108145458:108145507:+
359	cg19297232	GGCAAGCAGGTTTGGTTCCTGCCCAGCAAAGGTGAGGGAGGACGGAGGAGACTCTCCCAC[CG]CATTCAGAACTTTATTCCTTTATTTTTGTCTCAATCTTGTCATAGAGGAGCGCTTCACTT	16	67040522	F	SMPD3	-2.40365	0.0376578	0.191996	1.30512	1.30543	1202	SMPD3	NA	55512	chr16:68401299:68401348:-
359	cg19297232	GGCAAGCAGGTTTGGTTCCTGCCCAGCAAAGGTGAGGGAGGACGGAGGAGACTCTCCCAC[CG]CATTCAGAACTTTATTCCTTTATTTTTGTCTCAATCTTGTCATAGAGGAGCGCTTCACTT	16	67040522	F	SMPD3	-2.40365	0.0595093	0.0391257	2.0639	2.06512	1202	SMPD3	NA	55512	chr16:68403936:68403985:-
359	cg19297232	GGCAAGCAGGTTTGGTTCCTGCCCAGCAAAGGTGAGGGAGGACGGAGGAGACTCTCCCAC[CG]CATTCAGAACTTTATTCCTTTATTTTTGTCTCAATCTTGTCATAGAGGAGCGCTTCACTT	16	67040522	F	SMPD3	-2.40365	0.0312876	0.27842	1.08419	1.08437	1202	SMPD3	sphingomyelin phosphodiesterase 3	55512	chr16:68392577:68392626:-
360	cg19345165	CCGCTGCCTAGTCTGCATCTGAGTAACATGGCGGCGGCGGCGGTAGCCAGGCTGTGGTGG[CG]CGGGATCTTGGGGGCCTCGGCGCTGACCAGGGGTGAGCACGGGCAGCCAGCTGAGACCGG	11	47557253	R	NDUFS3;KBTBD4;KBTBD4;KBTBD4	-15.2555	-0.0129977	0.652582	-0.450279	0.450292	1202	KBTBD4	kelch repeat and BTB domain containing 4	55709	chr11:47600386:47600435:-
360	cg19345165	CCGCTGCCTAGTCTGCATCTGAGTAACATGGCGGCGGCGGCGGTAGCCAGGCTGTGGTGG[CG]CGGGATCTTGGGGGCCTCGGCGCTGACCAGGGGTGAGCACGGGCAGCCAGCTGAGACCGG	11	47557253	R	NDUFS3;KBTBD4;KBTBD4;KBTBD4	-15.2555	-0.00580203	0.840739	-0.200991	0.200992	1202	KBTBD4	kelch repeat and BTB domain containing 4	55709	chr11:47594396:47594445:-
360	cg19345165	CCGCTGCCTAGTCTGCATCTGAGTAACATGGCGGCGGCGGCGGTAGCCAGGCTGTGGTGG[CG]CGGGATCTTGGGGGCCTCGGCGCTGACCAGGGGTGAGCACGGGCAGCCAGCTGAGACCGG	11	47557253	R	NDUFS3;KBTBD4;KBTBD4;KBTBD4	-15.2555	0.0250857	0.384875	0.869175	0.869266	1202	KBTBD4	kelch repeat and BTB domain containing 4	55709	chr11:47594224:47594273:-
360	cg19345165	CCGCTGCCTAGTCTGCATCTGAGTAACATGGCGGCGGCGGCGGTAGCCAGGCTGTGGTGG[CG]CGGGATCTTGGGGGCCTCGGCGCTGACCAGGGGTGAGCACGGGCAGCCAGCTGAGACCGG	11	47557253	R	NDUFS3;KBTBD4;KBTBD4;KBTBD4	-15.2555	-0.0229917	0.425802	-0.796596	0.796667	1202	NDUFS3	NADH:ubiquinone oxidoreductase core subunit S3	4722	chr11:47606003:47606052:+
361	cg19356189	CAGGAACATCACTTGGTAATTAAGAGATCGCCTTGCTTCAGATCCTTGCTCTCCTAGCCA[CG]TGACTGTGAGCAAGTGACTTTGCTTCTCTGTGTCTGTTTCTTCAACTATAAAATAGGTAT	19	56216502	R	KLK10;KLK10	-1.52835	0.0335651	0.244904	1.16317	1.16339	1202	KLK10	kallikrein related peptidase 10	5655	chr19:51523135:51523184:-
361	cg19356189	CAGGAACATCACTTGGTAATTAAGAGATCGCCTTGCTTCAGATCCTTGCTCTCCTAGCCA[CG]TGACTGTGAGCAAGTGACTTTGCTTCTCTGTGTCTGTTTCTTCAACTATAAAATAGGTAT	19	56216502	R	KLK10;KLK10	-1.52835	-0.0373681	0.195441	-1.29507	1.29537	1202	KLK10	kallikrein related peptidase 10	5655	chr19:51517845:51517894:-
362	cg19371795	CAGACGCTTCTGAAAGGGCAAAGACGACGCCAAAGAAGACGCCGGAGACCTCGAATAGGG[CG]CAGGTGGACATCTCTGATTTTCAGCAGACCAGCCTGTATGTGTCTGAAGTCTAGCAACGA	19	7246107	F	INSR;INSR	0.402226	-0.00537607	0.852292	-0.186234	0.186235	1202	INSR	insulin receptor	3643	chr19:7117005:7117054:-
364	cg19398783	AACAAACAAAGCTAAGGTTCTTACCCCACGGCTTGCACTCTCTCAGCAGAGCTGCAGGTG[CG]TGGATGATTCGTTGACACGGTCAGAATTGGCTGCAGGAGGGAATTGAATCGAGGTTTTCT	4	38460973	R	TLR10;TLR10;TLR10;TLR10	35.8331	0.0112905	0.695763	0.391132	0.39114	1202	TLR10	toll like receptor 10	81793	chr4:38777432:38777481:-
364	cg19398783	AACAAACAAAGCTAAGGTTCTTACCCCACGGCTTGCACTCTCTCAGCAGAGCTGCAGGTG[CG]TGGATGATTCGTTGACACGGTCAGAATTGGCTGCAGGAGGGAATTGAATCGAGGTTTTCT	4	38460973	R	TLR10;TLR10;TLR10;TLR10	35.8331	-0.0857586	0.00292388	-2.97808	2.98175	1202	TLR10	toll like receptor 10	81793	chr4:38774724:38774773:-
364	cg19398783	AACAAACAAAGCTAAGGTTCTTACCCCACGGCTTGCACTCTCTCAGCAGAGCTGCAGGTG[CG]TGGATGATTCGTTGACACGGTCAGAATTGGCTGCAGGAGGGAATTGAATCGAGGTTTTCT	4	38460973	R	TLR10;TLR10;TLR10;TLR10	35.8331	-0.0249221	0.387983	-0.863505	0.863594	1202	TLR10	toll like receptor 10	81793	chr4:38774891:38774940:-
365	cg19439331	ACCGGCGCGAGTTGGAAAGTTTGCCCGAGGGCTGGTGCAGGCTTGGAGCTGGGGGCCGTG[CG]CTGCCCTGGGAATGTGACCCGGCCAGCGGTGAGTTGGGGCCGGGGCAGAGGGCAGGGGTG	10	69990476	R	TET1;TET1	2.7579	-0.0450231	0.118733	-1.5607	1.56123	1202	TET1	tet methylcytosine dioxygenase 1	80312	chr10:70453102:70453151:+
365	cg19439331	ACCGGCGCGAGTTGGAAAGTTTGCCCGAGGGCTGGTGCAGGCTTGGAGCTGGGGGCCGTG[CG]CTGCCCTGGGAATGTGACCCGGCCAGCGGTGAGTTGGGGCCGGGGCAGAGGGCAGGGGTG	10	69990476	R	TET1;TET1	2.7579	0.0178098	0.53732	0.617016	0.617049	1202	TET1	tet methylcytosine dioxygenase 1	80312	chr10:70320382:70320431:+
365	cg19439331	ACCGGCGCGAGTTGGAAAGTTTGCCCGAGGGCTGGTGCAGGCTTGGAGCTGGGGGCCGTG[CG]CTGCCCTGGGAATGTGACCCGGCCAGCGGTGAGTTGGGGCCGGGGCAGAGGGCAGGGGTG	10	69990476	R	TET1;TET1	2.7579	0.0109969	0.703294	0.380961	0.380968	1202	TET1	tet methylcytosine dioxygenase 1	80312	chr13:88546620:88546669:-
365	cg19439331	ACCGGCGCGAGTTGGAAAGTTTGCCCGAGGGCTGGTGCAGGCTTGGAGCTGGGGGCCGTG[CG]CTGCCCTGGGAATGTGACCCGGCCAGCGGTGAGTTGGGGCCGGGGCAGAGGGCAGGGGTG	10	69990476	R	TET1;TET1	2.7579	0.00994488	0.730517	0.344512	0.344518	1202	TET1	tet methylcytosine dioxygenase 1	80312	chr10:70320313:70320362:+
365	cg19439331	ACCGGCGCGAGTTGGAAAGTTTGCCCGAGGGCTGGTGCAGGCTTGGAGCTGGGGGCCGTG[CG]CTGCCCTGGGAATGTGACCCGGCCAGCGGTGAGTTGGGGCCGGGGCAGAGGGCAGGGGTG	10	69990476	R	TET1;TET1	2.7579	-0.0358302	0.214482	-1.24173	1.24199	1202	TET1	tet methylcytosine dioxygenase 1	80312	chr10:70454028:70454077:+
366	cg19514469	CGGGGCAGCCCGCCCCACCCCTCCCCCCAGGCTCCTCCCCATCCCTCCCTGCCCAGGCCG[CG]AGAATGACCACTCCACTTGCAGGCGAAGCCCCTGGCCGCTGTGCTGAAGGAGGTGTGCGA	16	65790933	F	ELMO3	3.77514	0.0787202	0.00632158	2.7326	2.73544	1202	ELMO3	engulfment and cell motility 3	79767	chr16:67237451:67237486:+,chr16:67237568:67237581:+
367	cg19556572	GTGTGGTGCTTCCTTCTGACCTTGGGCACCTCCGTCTTCAGTTGCCCCTCCTGTGAAAGG[CG]AAATGTATCGTTGGGTTCTTTGAGGCCCTTTACAGCTCTGACATCCTATAACATTCTGTA	9	116196522	F	AKNA	9.56788	-0.00896572	0.756163	-0.31059	0.310594	1202	AKNA	AT-hook transcription factor	80709	chr9:117098715:117098764:-
368	cg19560210	CGGGCACTATGCTGAGCAACTGCAGCTCAGGTCCTGCAGAGTCCCCGAGAGTACTTTGCA[CG]AAGAGAGCTCGAGTTCTGTAGTCAGGCATATCTGACCTACCGAACAGGTGCCCTGGTCAA	1	228579960	F	PGBD5	2.56016	0.00193481	0.946574	0.0670238	0.0670239	1202	PGBD5	piggyBac transposable element derived 5	79605	chr1:230457690:230457739:-
369	cg19566405	TGGAGCAGGACCAACTTACCAGCTCGCGGTGCTCCCTAGAAGCTGGATTCTTCGCAGGTG[CG]AGCACACCCCAGATGCCAGCGTGGACCCTTGAGCAACTGGAAGTTAAAAACCCACGAAAA	17	30784078	F	SLFN12	1.28627	-0.372518	7.25241e-41	-13.5565	13.9052	1202	SLFN12	schlafen family member 12	55106	chr17:33738803:33738852:-
370	cg19573166	ATCATTCATTCATTCATTCATTCACCCATTCACTAATCAGTAAAATTTAAGTGTCCACTA[CG]TTCCAGGACTTGCACTAGACTTTAAGGATAACAGGGTGGACAAGTTCCACTTTGGAGACC	14	22892248	R	SLC22A17;SLC22A17	-1.64533	0.0145153	0.615142	0.502861	0.502878	1202	SLC22A17	solute carrier family 22 member 17	51310	chr14:23816669:23816718:-
370	cg19573166	ATCATTCATTCATTCATTCATTCACCCATTCACTAATCAGTAAAATTTAAGTGTCCACTA[CG]TTCCAGGACTTGCACTAGACTTTAAGGATAACAGGGTGGACAAGTTCCACTTTGGAGACC	14	22892248	R	SLC22A17;SLC22A17	-1.64533	0.0347488	0.228649	1.20422	1.20446	1202	SLC22A17	solute carrier family 22 member 17	51310	chr14:23815661:23815710:-
371	cg19586576	GGAAAAGTCATTTTAAGTAAAGACAACGAGTTAATCAGGAGGCGATGAGCCCAGTCCTTC[CG]CCCCGCTTTCCCGCTTCCAGCCCTCGAACGAACCCTCCTCTAACCCCCGGGAGGCAGGAG	17	40262371	R	GJC1;GJC1	5.28588	0.0176807	0.540274	0.612542	0.612574	1202	GJC1	gap junction protein gamma 1	10052	chr17:42882041:42882090:-
371	cg19586576	GGAAAAGTCATTTTAAGTAAAGACAACGAGTTAATCAGGAGGCGATGAGCCCAGTCCTTC[CG]CCCCGCTTTCCCGCTTCCAGCCCTCGAACGAACCCTCCTCTAACCCCCGGGAGGCAGGAG	17	40262371	R	GJC1;GJC1	5.28588	0.0550378	0.0564411	1.90849	1.90946	1202	GJC1	gap junction protein gamma 1	10052	chr17:42876299:42876348:-
372	cg19615059	TGGCTTGGGGTCTCAGGGAACCGAACCGCCCTCCCCCCAGACCTGCTACCCCAGGCCCCA[CG]TTGGTGCCCATTTCACAGGTGATAAAACCGAGACCCAAAGAGCCGGTGTCCGGCCCAAGG	12	108755302	F	TRPV4;TRPV4	4.49265	-0.000271055	0.99251	-0.00938962	0.00938962	1202	TRPV4	transient receptor potential cation channel subfamily V member 4	59341	chr12:110234343:110234392:-
372	cg19615059	TGGCTTGGGGTCTCAGGGAACCGAACCGCCCTCCCCCCAGACCTGCTACCCCAGGCCCCA[CG]TTGGTGCCCATTTCACAGGTGATAAAACCGAGACCCAAAGAGCCGGTGTCCGGCCCAAGG	12	108755302	F	TRPV4;TRPV4	4.49265	0.011854	0.681393	0.410653	0.410663	1202	TRPV4	transient receptor potential cation channel subfamily V member 4	59341	chr12:110221179:110221228:-
373	cg19632206	AAATAATCAGCAGTTCCTGGTGGCATGTAACCAAGTAAAAACCAGTTACACAGAGAGCCA[CG]AACCCCCAAGGCAAGAAAGCAGAATGTGAAAATGCTTTATATGGGGGGGTGGGGAATGGT	1	188713379	F	FAM5C;FAM5C	1.89092	-0.000167136	0.995381	-0.00578975	0.00578975	1202	FAM5C	BMP/retinoic acid inducible neural specific 3	339479	chr1:190067282:190067331:-
373	cg19632206	AAATAATCAGCAGTTCCTGGTGGCATGTAACCAAGTAAAAACCAGTTACACAGAGAGCCA[CG]AACCCCCAAGGCAAGAAAGCAGAATGTGAAAATGCTTTATATGGGGGGGTGGGGAATGGT	1	188713379	F	FAM5C;FAM5C	1.89092	0.0502877	0.0813759	1.74349	1.74422	1202	FAM5C	BMP/retinoic acid inducible neural specific 3	339479	chr1:190067215:190067264:-
375	cg19685066	TTGTGAGACACTGTTTCTGAGAGCAGCTTTTGTGGCATCTTACAGGGCAGATTTCTGGTA[CG]TTCTAAAAGTTGAATTTCTAACTTTGGCTGGTTGTGGCCCCTGACTGTTTTTTTTTTTTT	1	17954590	F	ACTL8	3.33131	-0.0365067	0.205947	-1.26519	1.26547	1202	ACTL8	actin like 8	81569	chr1:18153235:18153284:+
376	cg19686152	ATTCCTTTACTTTTCTATAACTCTGTCATGACCAGTTTAAAGGCCCCAATGTCATGTCCT[CG]CATTAACAACCAAGGCTACAATGCAAGCCCTGCCATGTGCGCTTCTTTACAAAAGGTCAA	15	49908834	R	TMOD3	-2.06671	-0.00807668	0.779684	-0.27979	0.279793	1202	TMOD3	tropomodulin 3	29766	chr15:52201556:52201605:+
376	cg19686152	ATTCCTTTACTTTTCTATAACTCTGTCATGACCAGTTTAAAGGCCCCAATGTCATGTCCT[CG]CATTAACAACCAAGGCTACAATGCAAGCCCTGCCATGTGCGCTTCTTTACAAAAGGTCAA	15	49908834	R	TMOD3	-2.06671	0.0266966	0.355086	0.925016	0.925126	1202	TMOD3	tropomodulin 3	29766	chr15:52121913:52121962:+
377	cg19722847	TCTGCTTACAGCTGCTTCCAAATTAAGCATATCTGGATGGTGTGACACTTTTTGTTAGTC[CG]AGAACTGTATGGGCATCGCAACTGGGCCTGTTCCAAGATAGACTTGTTGGGACCTTCAAA	12	30740381	F	IPO8	-20.1458	0.00872904	0.762404	0.30239	0.302394	1202	IPO8	importin 8	10526	chr12:30782259:30782308:-
378	cg19724470	CATTCTTATGCGACTGTGTGTTCAGAATATAGCTCTGATGCTAGGCTGGAGGTCTGGACA[CG]GGTCCAAGTCCACCGCCAGCTGCTTGCTAGTAACATGACTTGTGTAAGTTATCCCAGCTG	9	5440936	F	CD274	-1.39911	-0.0782889	0.00661535	-2.71757	2.72036	1202	CD274	CD274 molecule	29126	chr9:5468106:5468155:+
379	cg19731122	AGTTTGAGAGACCAGGGCTGCTGGGGCCTGGTCATGCAGGGCCCGGACAGGGGGCTGTCC[CG]CTGTGAGGAAGCTCTTGGCTTACCCTCCTCTGAGCCTCAGAGCTTGTGAGGTTAGTTCCT	17	1343145	R	MYO1C;MYO1C	2.91434	0.0220582	0.444836	0.764242	0.764304	1202	MYO1C	myosin IC	4641	chr17:1367790:1367839:-
379	cg19731122	AGTTTGAGAGACCAGGGCTGCTGGGGCCTGGTCATGCAGGGCCCGGACAGGGGGCTGTCC[CG]CTGTGAGGAAGCTCTTGGCTTACCCTCCTCTGAGCCTCAGAGCTTGTGAGGTTAGTTCCT	17	1343145	R	MYO1C;MYO1C	2.91434	-0.0416456	0.149028	-1.44348	1.4439	1202	MYO1C	myosin IC	4641	chr17:1395875:1395924:-
379	cg19731122	AGTTTGAGAGACCAGGGCTGCTGGGGCCTGGTCATGCAGGGCCCGGACAGGGGGCTGTCC[CG]CTGTGAGGAAGCTCTTGGCTTACCCTCCTCTGAGCCTCAGAGCTTGTGAGGTTAGTTCCT	17	1343145	R	MYO1C;MYO1C	2.91434	0.0830918	0.00394195	2.88504	2.88837	1202	MYO1C	myosin IC	4641	chr17:1368547:1368596:-
380	cg19883905	CCGTCTCCTCACCTGCCCCACCCGTGGCCTGGGTTTAAAATCCACATACCCGTCTTTCCG[CG]GCCAAAGTGATGCTGCCAGGATTGGTTATGACCCCAACTGCCCCGACCCCCAGAAGTGCA	18	12244024	F	CIDEA;CIDEA	-3.21893	0.0183654	0.5247	0.636267	0.636303	1202	CIDEA	cell death-inducing DFFA-like effector a	1149	chr18:12277509:12277558:+
380	cg19883905	CCGTCTCCTCACCTGCCCCACCCGTGGCCTGGGTTTAAAATCCACATACCCGTCTTTCCG[CG]GCCAAAGTGATGCTGCCAGGATTGGTTATGACCCCAACTGCCCCGACCCCCAGAAGTGCA	18	12244024	F	CIDEA;CIDEA	-3.21893	-0.0349579	0.225859	-1.21147	1.21172	1202	CIDEA	cell death-inducing DFFA-like effector a	1149	chr18:12254788:12254837:+
380	cg19883905	CCGTCTCCTCACCTGCCCCACCCGTGGCCTGGGTTTAAAATCCACATACCCGTCTTTCCG[CG]GCCAAAGTGATGCTGCCAGGATTGGTTATGACCCCAACTGCCCCGACCCCCAGAAGTGCA	18	12244024	F	CIDEA;CIDEA	-3.21893	0.00984595	0.733095	0.341085	0.34109	1202	CIDEA	cell death-inducing DFFA-like effector a	1149	chr18:12274206:12274255:+
380	cg19883905	CCGTCTCCTCACCTGCCCCACCCGTGGCCTGGGTTTAAAATCCACATACCCGTCTTTCCG[CG]GCCAAAGTGATGCTGCCAGGATTGGTTATGACCCCAACTGCCCCGACCCCCAGAAGTGCA	18	12244024	F	CIDEA;CIDEA	-3.21893	0.00532665	0.853634	0.184522	0.184523	1202	CIDEA	cell death-inducing DFFA-like effector a	1149	chr18:12254793:12254842:+
382	cg20090497	TAAACCAGAGACTTGAATTATTGGCAAATGTCCAGACAACATTCACAATGCTTACTAGCA[CG]CTATTGCCATATGTACCTGGAAAGAGCAGCATAAAGAAGCCATCTAATGATATTACACAC	12	10853704	R	TAS2R9	4.87402	0.0533693	0.0643566	1.85053	1.85141	1202	TAS2R9	taste 2 receptor member 9	50835	chr12:10962006:10962055:-
383	cg20162159	GGTGCCTCCAGGCCACGTGGGCTGGCAGTCAACTCACCTGTTTCTCAGAGGAGTCCAGGA[CG]CACAGAAGGTGCCGGTCACTGCCCTCTGCCGGACCCATGGAGGGGTAAGGGTGTCCGGCC	3	49942069	R	MON1A;MON1A	-12.1796	0.0179823	0.533386	0.622993	0.623026	1202	MON1A	MON1 homolog A, secretory trafficking associated	84315	chr3:49947552:49947558:-,chr3:49946791:49946833:-
384	cg20173259	AGCCCCACCTCTCCCTTAGGGACCTCCGCCCACCCTACCCTCAAGCCAGGATGCCCGGAG[CG]TCCCCGGAAGTGGGTGTGGTTCAGGTGATTTAACTCATTATTTAATACGCCCGCAGGGTG	19	54212742	F	LHB	11.1136	-0.0132096	0.647299	-0.457619	0.457633	1202	LHB	luteinizing hormone beta polypeptide	3972	chr19:49519416:49519465:-
385	cg20234170	CAGAGTAATTTAACCCAGGATTGCTGACTTTTTAAGAGCTGAGAAAGCATAGCTATGGAG[CG]CAAGGCCCCACCCAGCAGGGTCTAAGTATTCCGTCTGCAAAACTGGCAGGCCACCAACGG	11	34416683	F	CAT	1.82905	-0.0828996	0.00402647	-2.87833	2.88165	1202	CAT	catalase	847	chr11:34493417:34493466:+
385	cg20234170	CAGAGTAATTTAACCCAGGATTGCTGACTTTTTAAGAGCTGAGAAAGCATAGCTATGGAG[CG]CAAGGCCCCACCCAGCAGGGTCTAAGTATTCCGTCTGCAAAACTGGCAGGCCACCAACGG	11	34416683	F	CAT	1.82905	-0.11305	8.56749e-05	-3.93297	3.94143	1202	CAT	catalase	847	chr11:34492588:34492588:+,chr11:34492915:34492963:+
386	cg20492933	CCTGGGGTGTAAGTACTGCTTGTGGGAGAGCCCCACAGGAAATCCAGAGTATTGCGCATG[CG]TGCTGTCCAGAAGGCGCTTGAACTCGGCGGCTTCCGTAGCGGGAGGGCGAAAGATGGCGG	5	154300809	R	MRPL22;MRPL22	2.94762	-0.0382764	0.184792	-1.32658	1.32691	1202	MRPL22	mitochondrial ribosomal protein L22	29093	chr5:154330449:154330498:+
386	cg20492933	CCTGGGGTGTAAGTACTGCTTGTGGGAGAGCCCCACAGGAAATCCAGAGTATTGCGCATG[CG]TGCTGTCCAGAAGGCGCTTGAACTCGGCGGCTTCCGTAGCGGGAGGGCGAAAGATGGCGG	5	154300809	R	MRPL22;MRPL22	2.94762	-0.0262876	0.362508	-0.910839	0.910944	1202	MRPL22	mitochondrial ribosomal protein L22	29093	chr5:154346428:154346477:+
387	cg20550118	GCTCGGTGCCCATGGCCCACTGCTGCTGGAGGAACCTGTGTCTCCCTTTGCAGCCTGTGG[CG]CGCCTTCCTTGCAGGGTGTGTACACTGGCTGTTTGCAGAGGGGGTTTGTGCATCCTAGTT	15	76420717	R	CRABP1	-4.8523	-0.00595252	0.836666	-0.206204	0.206205	1202	CRABP1	cellular retinoic acid binding protein 1	1381	chr15:78640322:78640359:+
388	cg20570279	GCGCCCGGAGCCGGGCTGCTTGGTTCCAGTGTTGGGCCACATACTGCTTGCGTGCTAGGT[CG]CCCCTCCGGGTGGCTCAGCCTCTTCCCCTCTCTCACAATCCCTGAATCCCTCTGTCCCTT	11	116164339	R	ZNF259	-0.79059	0.0750657	0.00922818	2.60525	2.60771	1202	ZNF259	ZPR1 zinc finger	8882	chr11:116649697:116649743:-
388	cg20570279	GCGCCCGGAGCCGGGCTGCTTGGTTCCAGTGTTGGGCCACATACTGCTTGCGTGCTAGGT[CG]CCCCTCCGGGTGGCTCAGCCTCTTCCCCTCTCTCACAATCCCTGAATCCCTCTGTCCCTT	11	116164339	R	ZNF259	-0.79059	0.0303772	0.292652	1.05262	1.05278	1202	ZNF259	ZPR1 zinc finger	8882	chr11:116649658:116649707:-
389	cg20572838	CCTGAACACCGCTCTGCAGAATCTTGGTGGCTAAGGTGTCCAGGAGCCTCTGCAGCGGAC[CG]CCAGCCTGAGAGGCGCAGAGCTTGTCGGGCAGGGGCCCGCTTGTCCCACTCCCCTGATTT	17	45805744	R	EME1;MRPL27;EME1	3.06267	-0.0192175	0.505644	-0.665794	0.665835	1202	EME1	essential meiotic structure-specific endonuclease 1	146956	chr17:48458456:48458505:+
389	cg20572838	CCTGAACACCGCTCTGCAGAATCTTGGTGGCTAAGGTGTCCAGGAGCCTCTGCAGCGGAC[CG]CCAGCCTGAGAGGCGCAGAGCTTGTCGGGCAGGGGCCCGCTTGTCCCACTCCCCTGATTT	17	45805744	R	EME1;MRPL27;EME1	3.06267	-0.0197576	0.493756	-0.684512	0.684556	1202	MRPL27	NA	NA	chr17:48450241:48450290:-
389	cg20572838	CCTGAACACCGCTCTGCAGAATCTTGGTGGCTAAGGTGTCCAGGAGCCTCTGCAGCGGAC[CG]CCAGCCTGAGAGGCGCAGAGCTTGTCGGGCAGGGGCCCGCTTGTCCCACTCCCCTGATTT	17	45805744	R	EME1;MRPL27;EME1	3.06267	-0.0293114	0.309923	-1.01567	1.01581	1202	MRPL27	mitochondrial ribosomal protein L27	51264	chr17:48445398:48445447:-
389	cg20572838	CCTGAACACCGCTCTGCAGAATCTTGGTGGCTAAGGTGTCCAGGAGCCTCTGCAGCGGAC[CG]CCAGCCTGAGAGGCGCAGAGCTTGTCGGGCAGGGGCCCGCTTGTCCCACTCCCCTGATTT	17	45805744	R	EME1;MRPL27;EME1	3.06267	-0.0289242	0.316361	-1.00224	1.00238	1202	MRPL27	NA	51264	chr17:48445763:48445812:-
390	cg20652640	GCCCGCCCGGGGCTAGAGGCGGCCGCCGGGAGGGCGCGCGGCGCCGGAGACATGTCCAGG[CG]GAAACAGAGCAACCCCCGGCAGATCAAGCGTGAGTCAAACTTTGCCCGCGGTCCCCTCCG	16	87047557	F	ZFPM1	-2.37603	0.00171765	0.952563	0.0595012	0.0595012	1202	ZFPM1	zinc finger protein, FOG family member 1	161882	chr16:88601281:88601330:+
391	cg20674577	CCTCCCAGTGGCCACGCGCCTTCTCACGCCCCTCTCCCGTGACGTCATGCTCCTCTCGCG[CG]GCATGATGGGAGAATCCTAATGTTTTCCAACAGATGCTCCAAGAACAGCTTTCAGATTAA	20	57612935	F	PHACTR3	-0.120529	-0.0366322	0.204392	-1.26954	1.26983	1202	PHACTR3	phosphatase and actin regulator 3	116154	chr20:58179999:58180048:+
391	cg20674577	CCTCCCAGTGGCCACGCGCCTTCTCACGCCCCTCTCCCGTGACGTCATGCTCCTCTCGCG[CG]GCATGATGGGAGAATCCTAATGTTTTCCAACAGATGCTCCAAGAACAGCTTTCAGATTAA	20	57612935	F	PHACTR3	-0.120529	0.0526477	0.0680528	1.82546	1.8263	1202	PHACTR3	phosphatase and actin regulator 3	116154	chr20:58422478:58422527:+
391	cg20674577	CCTCCCAGTGGCCACGCGCCTTCTCACGCCCCTCTCCCGTGACGTCATGCTCCTCTCGCG[CG]GCATGATGGGAGAATCCTAATGTTTTCCAACAGATGCTCCAAGAACAGCTTTCAGATTAA	20	57612935	F	PHACTR3	-0.120529	0.0662955	0.0215281	2.29992	2.30161	1202	PHACTR3	phosphatase and actin regulator 3	116154	chr20:58381242:58381249:+,chr20:58411560:58411601:+
392	cg20761322	CACCTGGTAGTTGTCTAGCTGCTCTTCGGTGAAGATGGTCTGCTTGTTCCCCATGGTGGC[CG]CCGCGCCGCCGCTCGCCCGCCCGGGCTCCGACTCCCATCAGCGGCCGCCAGACCCGGAGC	15	76210619	R	CIB2;CIB2	7.47326	-0.0481347	0.095305	-1.66872	1.66937	1202	CIB2	calcium and integrin binding family member 2	10518	chr15:78397286:78397335:-
393	cg20828084	GACTCCATATGCCCTAGGGATGTGTTGTGATGAACTTTTCCTACTGGTACTGTTTCCTCC[CG]CGAGGGAATGTCTAGACCAGCCGCACCTTCTTGCTTTGACCCTTCAGAACTTTGGCCTGT	15	78857906	R	KIAA1199	2.19383	-0.0525866	0.068374	-1.82333	1.82418	1202	KIAA1199	cell migration inducing hyaluronan binding protein	57214	chr15:81243801:81243850:+
394	cg20891917	TCTGCCGTACTGTAACTGAAACACAGGTTCAGTTGCTCACTGCTTGCAGAGTCCAGTTAA[CG]AGAGCGGGATCTGTTATAAAGAAAGTGATTTATTCCAAAGCTTAGCTTATGAGAAGAAAT	7	111851267	F	IFRD1	2.29678	-0.0345051	0.231931	-1.19577	1.19601	1202	IFRD1	interferon related developmental regulator 1	3475	chr7:112115946:112115995:+
394	cg20891917	TCTGCCGTACTGTAACTGAAACACAGGTTCAGTTGCTCACTGCTTGCAGAGTCCAGTTAA[CG]AGAGCGGGATCTGTTATAAAGAAAGTGATTTATTCCAAAGCTTAGCTTATGAGAAGAAAT	7	111851267	F	IFRD1	2.29678	0.0504224	0.0805629	1.74816	1.74891	1202	IFRD1	interferon related developmental regulator 1	3475	chr7:112063339:112063388:+
395	cg20967028	AGGGAAGAAATCAACTCCGACTTCTTTGCAAAACTGAAATCTCTGTGAAATAGCCAGATG[CG]CACACCAAATAAGGGTTTCTAAAGAGAACCCAAGTTACTTTTCAATTAAAAAAATAAAAT	12	14887539	R	ART4;ART4	5.8513	-0.0356404	0.216921	-1.23514	1.23541	1202	ART4	ADP-ribosyltransferase 4 (Dombrock blood group)	420	chr12:14993497:14993546:-
396	cg21006686	ATAAACCCGACTCAAAATCTGTCTTTTCCTGGGCAGATTGCAAAGGATTTTGCATCTCCC[CG]TTGCTGTTGCTGCTGCTCACACAGTCTTGGGAAAACGGGGGAAAATCAAGGAAAGAGAGG	12	116284623	R	NOS1	3.15281	-0.0296727	0.303995	-1.02819	1.02834	1202	NOS1	nitric oxide synthase 1	4842	chr12:117651242:117651291:-
397	cg21053529	CCGGAGGCAGCAGACAAAGACTGGGCAGCACCGGGCACGTTCCCGCTCCTGGCCCCTCCC[CG]GGCCGCACTTCCAGAATGGGAGTGAATTGCCTCCCAATTAAAGAAGCAATTTTTTAAAAA	15	32834052	F	GJD2	-0.0524602	-0.036921	0.200844	-1.27956	1.27985	1202	GJD2	gap junction protein delta 2	57369	chr15:35044763:35044812:-
398	cg21081971	GTCTTTCCAAAAGGCATAGGAAATCAGCAAGTTTCCACCAAATATACCAAAACCCTAAGA[CG]CGAGCCAGCCCAAGGGTGCAAGGTTCTGCGGCTGCAGGTGATGTGCGTGTGTGCGAGTGT	13	37342765	R	TRPC4;TRPC4;TRPC4;TRPC4;TRPC4;TRPC4	-2.97017	-0.0124351	0.666694	-0.430785	0.430796	1202	TRPC4	transient receptor potential cation channel subfamily C member 4	7223	chr13:38211168:38211217:-
399	cg21099326	GGTGTGGTTGGTGCGCAGGTCGGCGGGTGACGCGCGGTCTTTGCACACTGGGCAGGTGGG[CG]ACACCTGCACCTCCCAGCAGCGGCTCACGCACCCGCGGCAGAAGTTGTGGCCGCAGCGCA	8	27224508	F	TRIM35;PTK2B;PTK2B	-7.31926	-0.0304806	0.291011	-1.05621	1.05637	1202	PTK2B	protein tyrosine kinase 2 beta	2185	chr8:27316226:27316275:+
399	cg21099326	GGTGTGGTTGGTGCGCAGGTCGGCGGGTGACGCGCGGTCTTTGCACACTGGGCAGGTGGG[CG]ACACCTGCACCTCCCAGCAGCGGCTCACGCACCCGCGGCAGAAGTTGTGGCCGCAGCGCA	8	27224508	F	TRIM35;PTK2B;PTK2B	-7.31926	-0.0137922	0.632864	-0.477806	0.477821	1202	PTK2B	protein tyrosine kinase 2 beta	2185	chr8:27316655:27316704:+
399	cg21099326	GGTGTGGTTGGTGCGCAGGTCGGCGGGTGACGCGCGGTCTTTGCACACTGGGCAGGTGGG[CG]ACACCTGCACCTCCCAGCAGCGGCTCACGCACCCGCGGCAGAAGTTGTGGCCGCAGCGCA	8	27224508	F	TRIM35;PTK2B;PTK2B	-7.31926	0.0121633	0.673553	0.421369	0.42138	1202	PTK2B	protein tyrosine kinase 2 beta	2185	chr8:27180844:27180893:+
399	cg21099326	GGTGTGGTTGGTGCGCAGGTCGGCGGGTGACGCGCGGTCTTTGCACACTGGGCAGGTGGG[CG]ACACCTGCACCTCCCAGCAGCGGCTCACGCACCCGCGGCAGAAGTTGTGGCCGCAGCGCA	8	27224508	F	TRIM35;PTK2B;PTK2B	-7.31926	0.0336323	0.243961	1.1655	1.16572	1202	TRIM35	tripartite motif containing 35	23087	chr8:27142735:27142784:-
400	cg21120249	AGGACAAATGGGTGCAGAGATTCAGGCTGGCCAAGGCTGGCACAAGGACATTCCCAGTGG[CG]AGAGCATGAGCAAGGGTCACGGATGTGCCAGGAGGGGAGGCGGAGAGATGCCTGGGACCA	9	139041792	R	C9orf139;C9orf139;ABCA2;ABCA2	-5.28695	0.0307335	0.287026	1.06497	1.06514	1202	ABCA2	ATP binding cassette subfamily A member 2	20	chr9:139923322:139923367:-
400	cg21120249	AGGACAAATGGGTGCAGAGATTCAGGCTGGCCAAGGCTGGCACAAGGACATTCCCAGTGG[CG]AGAGCATGAGCAAGGGTCACGGATGTGCCAGGAGGGGAGGCGGAGAGATGCCTGGGACCA	9	139041792	R	C9orf139;C9orf139;ABCA2;ABCA2	-5.28695	-0.0284656	0.324097	-0.986345	0.986478	1202	ABCA2	ATP binding cassette subfamily A member 2	20	chr9:139901927:139901976:-
400	cg21120249	AGGACAAATGGGTGCAGAGATTCAGGCTGGCCAAGGCTGGCACAAGGACATTCCCAGTGG[CG]AGAGCATGAGCAAGGGTCACGGATGTGCCAGGAGGGGAGGCGGAGAGATGCCTGGGACCA	9	139041792	R	C9orf139;C9orf139;ABCA2;ABCA2	-5.28695	-0.0361652	0.210224	-1.25335	1.25362	1202	C9orf139	chromosome 9 open reading frame 139	401563	chr9:139930746:139930795:+
401	cg21137706	TCATCTATCAACGTAGTAGGCACTGTCCTAGGCGCTAGGGATTCCATGCAGAGCAAAAAA[CG]TCACAGTCCATGCCTTCACATGGCCTTCATGGACCACCGCGGGTGTTCTTTTTCCCCCGA	12	62459571	F	TMEM5	-5.98325	0.00969112	0.737136	0.335721	0.335726	1202	TMEM5	transmembrane protein 5	10329	chr12:64202567:64202616:+
402	cg21184495	CTCTGAAACGGACAAGATGGCTGCCACCTCTTCGCGCCTCTTAGTCCCACCCACTCAGGG[CG]GAGGTCTGCGTCATGTGACCCTCCCCTTCTTGGCTCCGCCTCCTACCGCAGTGCTTGACG	17	27701203	R	ZNF207;ZNF207;ZNF207;MIR632	-1.10267	0.051933	0.071884	1.80063	1.80144	1202	MIR632	microRNA 632	NA	chr17:30677129:30677178:+
402	cg21184495	CTCTGAAACGGACAAGATGGCTGCCACCTCTTCGCGCCTCTTAGTCCCACCCACTCAGGG[CG]GAGGTCTGCGTCATGTGACCCTCCCCTTCTTGGCTCCGCCTCCTACCGCAGTGCTTGACG	17	27701203	R	ZNF207;ZNF207;ZNF207;MIR632	-1.10267	0.0229709	0.426221	0.795875	0.795945	1202	ZNF207	zinc finger protein 207	7756	chr17:30697382:30697431:+
402	cg21184495	CTCTGAAACGGACAAGATGGCTGCCACCTCTTCGCGCCTCTTAGTCCCACCCACTCAGGG[CG]GAGGTCTGCGTCATGTGACCCTCCCCTTCTTGGCTCCGCCTCCTACCGCAGTGCTTGACG	17	27701203	R	ZNF207;ZNF207;ZNF207;MIR632	-1.10267	0.00337978	0.906816	0.117079	0.11708	1202	ZNF207	zinc finger protein 207	7756	chr17:30697149:30697198:+
403	cg21200703	CACTTAATTCTTGCAAATACCTCTCGGTGCTGACTTCAAGGAACTTGGCTGGCTTTGGGC[CG]CAGAAGTGAAAAACACAAAGCTCTCCACAATGTTCAAGTTGTTTTCTTCTTAATGTTACG	4	25266726	R	SLC34A2	3.95918	0.0705565	0.0144174	2.44822	2.45026	1202	SLC34A2	solute carrier family 34 member 2	10568	chr4:25679744:25679793:+
403	cg21200703	CACTTAATTCTTGCAAATACCTCTCGGTGCTGACTTCAAGGAACTTGGCTGGCTTTGGGC[CG]CAGAAGTGAAAAACACAAAGCTCTCCACAATGTTCAAGTTGTTTTCTTCTTAATGTTACG	4	25266726	R	SLC34A2	3.95918	-0.0115906	0.688097	-0.401527	0.401536	1202	SLC34A2	solute carrier family 34 member 2	10568	chr4:25678114:25678163:+
404	cg21201109	AGCCTAACATCAACTCTTTTAATTGTCATGACAATTCTATGAGATGGGCACTTATCGCCC[CG]TTTCACAGACAGGGGATGCAGAGGGTACAGAAAGGTACAGTGGCTTCCTCGGGGTCACTG	19	11168090	R	KANK2	0.648066	-0.0270584	0.3486	-0.93756	0.937675	1202	KANK2	KN motif and ankyrin repeat domains 2	25959	chr19:11275617:11275666:-
405	cg21207418	CTCGGCCCACACAGCCTCCGGGTGGACCTGCAGGGGCCTGTTTGTGCTGTAGGCTTGACA[CG]TCCAGGTATCTCTGTGTGTCTGTGTATCTCAGTGTGAGTGTGTGTGTGTGTGCACACTTG	19	11549711	R	ACP5;ACP5;ACP5;ACP5	6.26876	-0.22943	8.03343e-16	-8.09171	8.16549	1202	ACP5	acid phosphatase 5, tartrate resistant	54	chr19:11685717:11685766:-
406	cg21296230	GGTGCGTTGTTCGCGGGGGTGAATTGTGAAGAACCATCGCGGGGTCCTTCCTGCTGAGGC[CG]CGGACACCGTGACCTCGCTGCTCTGGGTCTGCAGGGAAACGTAGGAAAAAAAGTTGTCAG	15	30797828	R	GREM1	15.0646	-0.0291484	0.312623	-1.01002	1.01016	1202	GREM1	gremlin 1, DAN family BMP antagonist	26585	chr15:33026681:33026730:+
406	cg21296230	GGTGCGTTGTTCGCGGGGGTGAATTGTGAAGAACCATCGCGGGGTCCTTCCTGCTGAGGC[CG]CGGACACCGTGACCTCGCTGCTCTGGGTCTGCAGGGAAACGTAGGAAAAAAAGTTGTCAG	15	30797828	R	GREM1	15.0646	-0.023859	0.408552	-0.826655	0.826734	1202	GREM1	gremlin 1, DAN family BMP antagonist	26585	chr15:33026328:33026377:+
407	cg21363706	TTGCATTCAGGTAGATTATTTGGAAGATGATTTAAGGACGTACCAGTGCAGGAGTTGTCG[CG]GGACAGTGAGACCAGGGCAGTTTGACAATCAATAAAGGGTGCATCATTGGCAAGCTACCT	8	18110765	F	NAT1;NAT1;NAT1;NAT1;NAT1;NAT1;NAT1;NAT1	1.1405	0.00626394	0.82825	0.216992	0.216994	1202	NAT1	N-acetyltransferase 1	9	chr8:18067672:18067689:+,chr8:18076920:18076951:+
407	cg21363706	TTGCATTCAGGTAGATTATTTGGAAGATGATTTAAGGACGTACCAGTGCAGGAGTTGTCG[CG]GGACAGTGAGACCAGGGCAGTTTGACAATCAATAAAGGGTGCATCATTGGCAAGCTACCT	8	18110765	F	NAT1;NAT1;NAT1;NAT1;NAT1;NAT1;NAT1;NAT1	1.1405	0.0460201	0.11078	1.59531	1.59587	1202	NAT1	N-acetyltransferase 1	9	chr8:18080958:18081007:+
407	cg21363706	TTGCATTCAGGTAGATTATTTGGAAGATGATTTAAGGACGTACCAGTGCAGGAGTTGTCG[CG]GGACAGTGAGACCAGGGCAGTTTGACAATCAATAAAGGGTGCATCATTGGCAAGCTACCT	8	18110765	F	NAT1;NAT1;NAT1;NAT1;NAT1;NAT1;NAT1;NAT1	1.1405	0.0413119	0.152316	1.4319	1.43231	1202	NAT1	N-acetyltransferase 1	9	chr8:18079801:18079850:+
408	cg21649520	CCAATGGGGAAAGGCAGTGTCGGGACTAAGCAATGAATGGCTCTTCAATGGCCAGCTGCC[CG]CCCAATAGGATAAAAGAAAACCCCACATAATACTTCCCTTTGTCTCCAAAAAAATTTATA	8	82522354	R	PMP2	-1.46203	0.0310052	0.282784	1.0744	1.07457	1202	PMP2	peripheral myelin protein 2	5375	chr8:82352735:82352784:-
409	cg21712685	TGGAGCCCGAAGGCGCCGGGCAGCCTGAAAGGGAGAGGTGGGTCCGGAACCACACCCAGG[CG]GGTAGCCTGGGGCATCCTCAGACGGACTTCAAAAGCCGCTTCACTTTCCCCTGGTGGCCT	6	35852583	F	C6orf126	-1.76536	-0.0376873	0.191649	-1.30614	1.30645	1202	C6orf126	colipase like 2	389383	chr6:35747206:35747255:+
410	cg21762589	AGTCTTTCTTCTTGAAAGCATTGTTGATCCAAATCCAAGTGTCAAGGTGCGCCCCAGAAA[CG]CTGCTTCCCAGACAGTCGTGTCTGGTCTTGCGGGAAAGGAGGAGGCGTCCCGCCAAGGAA	10	133646466	R	BNIP3	2.11688	0.042505	0.140812	1.4733	1.47375	1202	BNIP3	BCL2 interacting protein 3	664	chr10:133781339:133781388:-
412	cg21835643	CGCCTGTTTCCCGCCTGCTCTCAGGAGCGACCGCCAGGGGGCGCCCGAGATGGCAGGGGG[CG]TGGGAAGCCCACATCTGCCCAGCAGGTGCGCCCACCCCGAGCAAACAGGGGGCCGGGGCC	20	43368775	F	MATN4;MATN4;RBPJL;MATN4	3.15896	-0.0233508	0.418608	-0.809044	0.809117	1202	MATN4	matrilin 4	8785	chr20:43922586:43922635:-
412	cg21835643	CGCCTGTTTCCCGCCTGCTCTCAGGAGCGACCGCCAGGGGGCGCCCGAGATGGCAGGGGG[CG]TGGGAAGCCCACATCTGCCCAGCAGGTGCGCCCACCCCGAGCAAACAGGGGGCCGGGGCC	20	43368775	F	MATN4;MATN4;RBPJL;MATN4	3.15896	0.0318301	0.270168	1.103	1.10318	1202	MATN4	matrilin 4	8785	chr20:43929997:43930046:-
412	cg21835643	CGCCTGTTTCCCGCCTGCTCTCAGGAGCGACCGCCAGGGGGCGCCCGAGATGGCAGGGGG[CG]TGGGAAGCCCACATCTGCCCAGCAGGTGCGCCCACCCCGAGCAAACAGGGGGCCGGGGCC	20	43368775	F	MATN4;MATN4;RBPJL;MATN4	3.15896	0.0348907	0.226753	1.20914	1.20939	1202	MATN4	matrilin 4	8785	chr20:43926834:43926883:-
412	cg21835643	CGCCTGTTTCCCGCCTGCTCTCAGGAGCGACCGCCAGGGGGCGCCCGAGATGGCAGGGGG[CG]TGGGAAGCCCACATCTGCCCAGCAGGTGCGCCCACCCCGAGCAAACAGGGGGCCGGGGCC	20	43368775	F	MATN4;MATN4;RBPJL;MATN4	3.15896	0.0168863	0.558631	0.585013	0.58504	1202	RBPJL	recombination signal binding protein for immunoglobulin kappa J region like	11317	chr20:43946387:43946436:+
413	cg21907579	AAATATTACTGTTTATTACCAGGCATACCCCAGTAAAATAAAGAGGCAACCAGGCGATAG[CG]ACTATCTCACCAGCCGCTGCACCTATAGGACTTGGAGACGTCACGAGTCACGCAACCGGC	12	113330251	F	TBX5;TBX5;TBX5;TBX5	2.49761	0.0428238	0.137854	1.48437	1.48482	1202	TBX5	T-box 5	6910	chr12:114843508:114843557:-
413	cg21907579	AAATATTACTGTTTATTACCAGGCATACCCCAGTAAAATAAAGAGGCAACCAGGCGATAG[CG]ACTATCTCACCAGCCGCTGCACCTATAGGACTTGGAGACGTCACGAGTCACGCAACCGGC	12	113330251	F	TBX5;TBX5;TBX5;TBX5	2.49761	-0.0674907	0.0192772	-2.3415	2.34329	1202	TBX5	T-box 5	6910	chr12:114804131:114804180:-
413	cg21907579	AAATATTACTGTTTATTACCAGGCATACCCCAGTAAAATAAAGAGGCAACCAGGCGATAG[CG]ACTATCTCACCAGCCGCTGCACCTATAGGACTTGGAGACGTCACGAGTCACGCAACCGGC	12	113330251	F	TBX5;TBX5;TBX5;TBX5	2.49761	-0.0331875	0.250257	-1.15007	1.15028	1202	TBX5	T-box 5	6910	chr12:114804128:114804177:-
414	cg21926612	AGCTGCCAAACATCTGGATCAACCTGGGCACTACGAGGGGTTGAATTTCTACCATTATCG[CG]CCTTTTGATATTTTTTTCCAGACCTCCTGCTCACATCCGTAAAGCCCACTGATTCTTTTA	6	163069159	R	PACRG;PACRG;PACRG;PACRG;PARK2;PARK2;PARK2	-2.15159	-0.031497	0.275215	-1.09145	1.09163	1202	PACRG	PARK2 coregulated	135138	chr6:163735903:163735952:+
414	cg21926612	AGCTGCCAAACATCTGGATCAACCTGGGCACTACGAGGGGTTGAATTTCTACCATTATCG[CG]CCTTTTGATATTTTTTTCCAGACCTCCTGCTCACATCCGTAAAGCCCACTGATTCTTTTA	6	163069159	R	PACRG;PACRG;PACRG;PACRG;PARK2;PARK2;PARK2	-2.15159	0.0214511	0.457471	0.7432	0.743257	1202	PACRG	PARK2 coregulated	135138	chr6:163733841:163733890:+
414	cg21926612	AGCTGCCAAACATCTGGATCAACCTGGGCACTACGAGGGGTTGAATTTCTACCATTATCG[CG]CCTTTTGATATTTTTTTCCAGACCTCCTGCTCACATCCGTAAAGCCCACTGATTCTTTTA	6	163069159	R	PACRG;PACRG;PACRG;PACRG;PARK2;PARK2;PARK2	-2.15159	0.0613113	0.0335498	2.12655	2.12789	1202	PACRG	PARK2 coregulated	135138	chr6:163149103:163149152:+
414	cg21926612	AGCTGCCAAACATCTGGATCAACCTGGGCACTACGAGGGGTTGAATTTCTACCATTATCG[CG]CCTTTTGATATTTTTTTCCAGACCTCCTGCTCACATCCGTAAAGCCCACTGATTCTTTTA	6	163069159	R	PACRG;PACRG;PACRG;PACRG;PARK2;PARK2;PARK2	-2.15159	-0.0117212	0.68477	-0.406052	0.406061	1202	PACRG	PARK2 coregulated	135138	chr6:163736446:163736495:+
414	cg21926612	AGCTGCCAAACATCTGGATCAACCTGGGCACTACGAGGGGTTGAATTTCTACCATTATCG[CG]CCTTTTGATATTTTTTTCCAGACCTCCTGCTCACATCCGTAAAGCCCACTGATTCTTTTA	6	163069159	R	PACRG;PACRG;PACRG;PACRG;PARK2;PARK2;PARK2	-2.15159	-0.0137586	0.633693	-0.476643	0.476658	1202	PARK2	parkin RBR E3 ubiquitin protein ligase	5071	chr6:161769740:161769789:-
414	cg21926612	AGCTGCCAAACATCTGGATCAACCTGGGCACTACGAGGGGTTGAATTTCTACCATTATCG[CG]CCTTTTGATATTTTTTTCCAGACCTCCTGCTCACATCCGTAAAGCCCACTGATTCTTTTA	6	163069159	R	PACRG;PACRG;PACRG;PACRG;PARK2;PARK2;PARK2	-2.15159	0.0565496	0.0499847	1.96103	1.96207	1202	PARK2	parkin RBR E3 ubiquitin protein ligase	5071	chr6:161770814:161770863:-
415	cg21993406	AAGAAAGCTCAAAGGTACCCTGCAGACACTCAAAACTTGAGGGCACGCAACTCTCAGTTA[CG]AGTGGTGGCAATCATAATGACAGAATGAAGTACCAGTGCAAGAAACTGGAAGCGTGTGGA	5	68520539	F	CENPH	1.01756	0.0373809	0.195287	1.29552	1.29582	1202	CENPH	centromere protein H	64946	chr5:68506062:68506111:+
415	cg21993406	AAGAAAGCTCAAAGGTACCCTGCAGACACTCAAAACTTGAGGGCACGCAACTCTCAGTTA[CG]AGTGGTGGCAATCATAATGACAGAATGAAGTACCAGTGCAAGAAACTGGAAGCGTGTGGA	5	68520539	F	CENPH	1.01756	0.0413776	0.151664	1.43418	1.43459	1202	CENPH	centromere protein H	64946	chr5:68504183:68504186:+,chr5:68505534:68505579:+
416	cg22090592	CCATGGTGCCCTGGGGCCCTGCTACAGGTGCTCAGGTAGGGAGGTAGGGTGCCTGCTGTA[CG]CTGGACCTGGACCTACTGGGCCCCAGGCAGGACATCCTTTAGACCCTCTGGGAGGCTCCA	14	104245687	F	INF2;INF2	-0.38718	-0.0235486	0.414678	-0.815897	0.815973	1202	INF2	inverted formin, FH2 and WH2 domain containing	64423	chr14:105185892:105185941:+
416	cg22090592	CCATGGTGCCCTGGGGCCCTGCTACAGGTGCTCAGGTAGGGAGGTAGGGTGCCTGCTGTA[CG]CTGGACCTGGACCTACTGGGCCCCAGGCAGGACATCCTTTAGACCCTCTGGGAGGCTCCA	14	104245687	F	INF2;INF2	-0.38718	-0.00996758	0.729926	-0.345299	0.345304	1202	INF2	inverted formin, FH2 and WH2 domain containing	64423	chr14:105175015:105175064:+
416	cg22090592	CCATGGTGCCCTGGGGCCCTGCTACAGGTGCTCAGGTAGGGAGGTAGGGTGCCTGCTGTA[CG]CTGGACCTGGACCTACTGGGCCCCAGGCAGGACATCCTTTAGACCCTCTGGGAGGCTCCA	14	104245687	F	INF2;INF2	-0.38718	-0.0943797	0.00105273	-3.27917	3.28407	1202	INF2	inverted formin, FH2 and WH2 domain containing	64423	chr14:105170708:105170757:+
416	cg22090592	CCATGGTGCCCTGGGGCCCTGCTACAGGTGCTCAGGTAGGGAGGTAGGGTGCCTGCTGTA[CG]CTGGACCTGGACCTACTGGGCCCCAGGCAGGACATCCTTTAGACCCTCTGGGAGGCTCCA	14	104245687	F	INF2;INF2	-0.38718	-0.04759	0.0991153	-1.64981	1.65044	1202	INF2	inverted formin, FH2 and WH2 domain containing	64423	chr14:105185680:105185729:+
417	cg22179082	AACACAGGGTAGGACTTCAAAACACCAGCGTGAGCGAGGCAGGCACACACGGACTCGCGG[CG]GTCTGTTTGCAACAGCGCTGGGAATGCACATTGGAAAATCACATCTTGCATGCTGAAAAC	13	26232259	F	GPR12	-1.50907	0.00586038	0.839159	0.203012	0.203013	1202	GPR12	G protein-coupled receptor 12	2835	chr13:27332988:27333037:-
418	cg22194129	CCCGGTTGGTGAGGGAGGGAGTCCCAACCCAGGGTTATGGGTGGCTGGACACACAACACC[CG]ACACTGGACAGATAAGACTGACAGCAGTTCAGCTGCATGTACTCACGGCCTGAGGCAGGA	12	7792928	F	CLEC4C;CLEC4C	0.727266	-0.300471	1.67781e-26	-10.74	10.9129	1202	CLEC4C	C-type lectin domain family 4 member C	170482	chr12:7883393:7883397:-,chr12:7882292:7882336:-
418	cg22194129	CCCGGTTGGTGAGGGAGGGAGTCCCAACCCAGGGTTATGGGTGGCTGGACACACAACACC[CG]ACACTGGACAGATAAGACTGACAGCAGTTCAGCTGCATGTACTCACGGCCTGAGGCAGGA	12	7792928	F	CLEC4C;CLEC4C	0.727266	-0.346924	2.53271e-35	-12.538	12.8136	1202	CLEC4C	C-type lectin domain family 4 member C	170482	chr12:7898957:7899006:-
419	cg22197830	GAAGGCTCCTGGGCCTTTCTGGCTCTGGGAATGAAGCGTGGAAAACCCTCCTTAGGCGGG[CG]CAGTGCTTCAAGTAGCCAAGCTCTGACTTCCGAGGGAAGAAAGGAGGCCATGGGCCTCTG	5	134237683	R	TXNDC15;TXNDC15	-0.117965	-0.0366966	0.203596	-1.27178	1.27207	1202	TXNDC15	thioredoxin domain containing 15	79770	chr5:134235824:134235873:+
420	cg22282672	AACTCAGTCCCGTCCCTTTTGTTGACAGGTTGCCAGGATACATCCAGGCAACAAAGACTG[CG]GTTCCTGTTACTCAGCAGCCTCAAAAACTCACACCAGCTCCTGCAAGGAATGTGAATCTT	5	121493122	R	ZNF474;ZNF474	4.81369	0.0432679	0.133813	1.49978	1.50025	1202	ZNF474	zinc finger protein 474	133923	chr5:121488853:121488902:+
420	cg22282672	AACTCAGTCCCGTCCCTTTTGTTGACAGGTTGCCAGGATACATCCAGGCAACAAAGACTG[CG]GTTCCTGTTACTCAGCAGCCTCAAAAACTCACACCAGCTCCTGCAAGGAATGTGAATCTT	5	121493122	R	ZNF474;ZNF474	4.81369	-0.0138935	0.630369	-0.481315	0.481331	1202	ZNF474	zinc finger protein 474	133923	chr5:121488775:121488824:+
421	cg22395019	CTCGCCAGGCGGCGCTGTGCCTGGGAGGACTTTCCCGCTCATCGCGGGGGCTGCACGTGG[CG]CTGAAGCCGGGGTCCCACCCCCAATGTGCTCGTCCTACCACAGCCAAGGCTGGGATTCCA	2	31215196	F	GALNT14	0.0274946	0.0444373	0.123611	1.54037	1.54088	1202	GALNT14	polypeptide N-acetylgalactosaminyltransferase 14	79623	chr2:31133571:31133620:-
422	cg22396353	TGTGCGGAGCCATTCGCTGCGCTGAAGCAGTGCGCATGCGCACTGGACGCTTCTTACCAG[CG]TCCTGACTACAATACCCAGGACGCACCCAGCCCGCCGCCTCTCGGAGCCCTTTTCAAACC	22	45071351	F	GTSE1;GTSE1;CN5H6.4	6.42884	0.00421137	0.884035	0.145887	0.145887	1202	GTSE1	tRNA 5-methylaminomethyl-2-thiouridylate methyltransferase	51512	chr22:46752919:46752968:+
423	cg22407458	GCGGCGGAGCGGCGGGTTGGGGCGTCGCACGGTGAGAAAGGCCGGGGCCTGAGAACAAAC[CG]CCGCGGTCGCCGGGGCAACGGGACGGGGCACGTGCCCCCCCCGCCAGAGCCGGAAGCGGC	6	35217099	R	TCP11;TCP11;TCP11;TCP11	4.23247	0.019515	0.499078	0.676104	0.676147	1202	TCP11	t-complex 11	6954	chr6:35096839:35096846:-,chr6:35090077:35090114:-
423	cg22407458	GCGGCGGAGCGGCGGGTTGGGGCGTCGCACGGTGAGAAAGGCCGGGGCCTGAGAACAAAC[CG]CCGCGGTCGCCGGGGCAACGGGACGGGGCACGTGCCCCCCCCGCCAGAGCCGGAAGCGGC	6	35217099	R	TCP11;TCP11;TCP11;TCP11	4.23247	0.0214595	0.457295	0.743492	0.74355	1202	TCP11	t-complex 11	6954	chr6:35085960:35086009:-
424	cg22473095	GTAGTTGCGGGGACCTGGGAGGCCGGGCTCTTTCCTCCTTGGCCTGCCTTCCGCTGGCTG[CG]TGGGGCAGCCAAGAACAAAGCCTGCGAGCTTCCATCAATTGTAAAGCAAAGCACCCTTTA	20	18425967	F	RBBP9	4.04404	0.0373413	0.195761	1.29414	1.29444	1202	RBBP9	RB binding protein 9, serine hydrolase	10741	chr20:18468612:18468661:-
424	cg22473095	GTAGTTGCGGGGACCTGGGAGGCCGGGCTCTTTCCTCCTTGGCCTGCCTTCCGCTGGCTG[CG]TGGGGCAGCCAAGAACAAAGCCTGCGAGCTTCCATCAATTGTAAAGCAAAGCACCCTTTA	20	18425967	F	RBBP9	4.04404	0.0135937	0.637767	0.470929	0.470943	1202	RBBP9	RB binding protein 9, serine hydrolase	10741	chr20:18467293:18467342:-
425	cg22484793	GGCAGGCAGGCTCCATAGTGCCAGGCATCTGGCTGGCTCAGCAGCAGGGGGCGATGGCAT[CG]TCTTCCTGCCCACCTGGGAGCCAATGTTTCGGCTGGGCAAGGACAAGCCTCCTCTGGGTC	3	52236365	R	TLR9	1.54728	0.0111216	0.700094	0.385278	0.385286	1202	TLR9	toll like receptor 9	54106	chr3:52255241:52255290:-
426	cg22495124	GAAGGCCCTGACCCTGCTGAGCAGTGTCTTTGCTGTCTGTGGCTTGGGCCTCCTGGGTAT[CG]CGGTCAGCACCGACTACTGGCTGTACCTGGAGGAGGGTGTGATTGTGCCCCAGAACCAGA	17	62303990	R	CACNG5;CACNG5	9.77236	0.0117263	0.684641	0.406228	0.406237	1202	CACNG5	calcium voltage-gated channel auxiliary subunit gamma 5	27091	chr17:64881282:64881331:+
426	cg22495124	GAAGGCCCTGACCCTGCTGAGCAGTGTCTTTGCTGTCTGTGGCTTGGGCCTCCTGGGTAT[CG]CGGTCAGCACCGACTACTGGCTGTACCTGGAGGAGGGTGTGATTGTGCCCCAGAACCAGA	17	62303990	R	CACNG5;CACNG5	9.77236	0.0213282	0.460053	0.738941	0.738997	1202	CACNG5	calcium voltage-gated channel auxiliary subunit gamma 5	27091	chr17:64880727:64880776:+
427	cg22511262	TATTAGTAAAGCGTTTACTAAATTACCGAATCAAACCGAACTGGCTTAGGTTCTCAATAG[CG]TGGAAATCCACTGAAAATAAATGAAGAGGGCAAACTACAGGGGCTCCGCAGGTTCGGGTC	11	32411768	F	WT1;WT1;WT1;WT1	5.56756	0.0588793	0.0412524	2.042	2.04318	1202	WT1	Wilms tumor 1	7490	chr11:32410420:32410469:-
427	cg22511262	TATTAGTAAAGCGTTTACTAAATTACCGAATCAAACCGAACTGGCTTAGGTTCTCAATAG[CG]TGGAAATCCACTGAAAATAAATGAAGAGGGCAAACTACAGGGGCTCCGCAGGTTCGGGTC	11	32411768	F	WT1;WT1;WT1;WT1	5.56756	-0.0199201	0.490208	-0.690145	0.69019	1202	WT1	Wilms tumor 1	7490	chr11:32410076:32410125:-
428	cg22512531	CAATGGCTAAGGAGTATAGAAAGGATCATTATAGTGTGTGTCTCTGTGGGTCCTATGTTA[CG]GCAAGATGAAACAAGCTTATTAGGCTCTGTCTTTTAAGGGCATACCAGTTGAAAGAGCAT	11	122214761	F	CRTAM	6.2796	-0.0331506	0.250784	-1.14879	1.149	1202	CRTAM	cytotoxic and regulatory T-cell molecule	56253	chr11:122742865:122742914:+
429	cg22580353	ACTTGCCCAACATGAGCCCTGGTCTTGTCTGACCCCAAAGCCCATGGGAAGTTTAGGCTG[CG]TGGAAGGACAGCCTGGTGGGCTCAGGATCTGTCCCATCACGAGTTGGAACCTCAGCTCTG	19	49838740	R	PVR;PVR;PVR;PVR	3.48534	-0.0384122	0.183238	-1.33129	1.33162	1202	PVR	poliovirus receptor	5817	chr19:45157252:45157286:+,chr19:45161030:45161044:+
429	cg22580353	ACTTGCCCAACATGAGCCCTGGTCTTGTCTGACCCCAAAGCCCATGGGAAGTTTAGGCTG[CG]TGGAAGGACAGCCTGGTGGGCTCAGGATCTGTCCCATCACGAGTTGGAACCTCAGCTCTG	19	49838740	R	PVR;PVR;PVR;PVR	3.48534	0.0113206	0.694993	0.392174	0.392183	1202	PVR	poliovirus receptor	5817	chr19:45166654:45166703:+
429	cg22580353	ACTTGCCCAACATGAGCCCTGGTCTTGTCTGACCCCAAAGCCCATGGGAAGTTTAGGCTG[CG]TGGAAGGACAGCCTGGTGGGCTCAGGATCTGTCCCATCACGAGTTGGAACCTCAGCTCTG	19	49838740	R	PVR;PVR;PVR;PVR	3.48534	-0.00186133	0.9486	-0.0644785	0.0644785	1202	PVR	poliovirus receptor	5817	chr19:45162198:45162247:+
430	cg22582569	ACCTAGGAAGTAAGATAATTTTAAAAAGAGAGCACTTTGGCAGTGGTGAAGCAGGTGAAA[CG]GTTGAATACAACACCTGTGGTTTCAAAGAAAAGTTCCCACAGAGCGGATACACTACTCGT	11	111141635	F	PPP2R1B;PPP2R1B	6.35231	-0.0145886	0.613359	-0.505398	0.505416	1202	PPP2R1B	protein phosphatase 2 scaffold subunit Abeta	5519	chr11:111608731:111608780:-
430	cg22582569	ACCTAGGAAGTAAGATAATTTTAAAAAGAGAGCACTTTGGCAGTGGTGAAGCAGGTGAAA[CG]GTTGAATACAACACCTGTGGTTTCAAAGAAAAGTTCCCACAGAGCGGATACACTACTCGT	11	111141635	F	PPP2R1B;PPP2R1B	6.35231	0.0308285	0.285537	1.06827	1.06844	1202	PPP2R1B	protein phosphatase 2 scaffold subunit Abeta	5519	chr11:111608172:111608189:-,chr11:111597750:111597781:-
430	cg22582569	ACCTAGGAAGTAAGATAATTTTAAAAAGAGAGCACTTTGGCAGTGGTGAAGCAGGTGAAA[CG]GTTGAATACAACACCTGTGGTTTCAAAGAAAAGTTCCCACAGAGCGGATACACTACTCGT	11	111141635	F	PPP2R1B;PPP2R1B	6.35231	-0.0338645	0.240718	-1.17355	1.17377	1202	PPP2R1B	protein phosphatase 2 scaffold subunit Abeta	5519	chr11:111613335:111613384:-
431	cg22594309	GGACGGCAAGGACGCGTGGCTGGCGACGGTTTCGCAGGGGCGCCCGTTCCCCTGGGGGCG[CG]AAGTCCCCGCTCCACCGCTGCCCCAACTCGGCTCCGAAGTGCCTTTGCCGCAAGACTTGC	1	200946127	F	SYT2;SYT2	16.6353	0.00716575	0.803995	0.248233	0.248235	1202	SYT2	synaptotagmin 2	127833	chr1:202562636:202562685:-
431	cg22594309	GGACGGCAAGGACGCGTGGCTGGCGACGGTTTCGCAGGGGCGCCCGTTCCCCTGGGGGCG[CG]AAGTCCCCGCTCCACCGCTGCCCCAACTCGGCTCCGAAGTGCCTTTGCCGCAAGACTTGC	1	200946127	F	SYT2;SYT2	16.6353	0.0143512	0.619144	0.497176	0.497193	1202	SYT2	synaptotagmin 2	127833	chr1:202562696:202562745:-
431	cg22594309	GGACGGCAAGGACGCGTGGCTGGCGACGGTTTCGCAGGGGCGCCCGTTCCCCTGGGGGCG[CG]AAGTCCCCGCTCCACCGCTGCCCCAACTCGGCTCCGAAGTGCCTTTGCCGCAAGACTTGC	1	200946127	F	SYT2;SYT2	16.6353	0.0196424	0.496278	0.680521	0.680564	1202	SYT2	synaptotagmin 2	127833	chr15:30446211:30446260:-
431	cg22594309	GGACGGCAAGGACGCGTGGCTGGCGACGGTTTCGCAGGGGCGCCCGTTCCCCTGGGGGCG[CG]AAGTCCCCGCTCCACCGCTGCCCCAACTCGGCTCCGAAGTGCCTTTGCCGCAAGACTTGC	1	200946127	F	SYT2;SYT2	16.6353	0.0141081	0.625094	0.488753	0.488769	1202	SYT2	synaptotagmin 2	127833	chr1:202565269:202565318:-
432	cg22736354	TGCGCCAGGGCGGCCACGCAGGCCAGGCAGACCACGTGGCCGCAGGACAGGTTGCGCGGG[CG]CCGCTGCTGCCGGTGGCCAAACTTCTCAAAGCACACCTTGCACTCGAGCAGGCTGATCTC	6	18230698	F	NHLRC1	31.8422	0.0473346	0.100944	1.64094	1.64156	1202	NHLRC1	NHL repeat containing E3 ubiquitin protein ligase 1	378884	chr6:18121119:18121168:-
433	cg22809047	TCACATCTGTCATCTCTCAGGTCATATCCAACACACTGGGCCACCCACGCACAGGGACGA[CG]CGACAGCCCTGTGGCTCCACCGCACAGGACAGCCACGACTGGCAATCCTGTGCCGGCCCT	2	100984693	F	RPL31;RPL31;RPL31	1.37751	-0.0688431	0.0169805	-2.38857	2.39046	1202	RPL31	ribosomal protein L31	6160	chr7:121874692:121874741:+
433	cg22809047	TCACATCTGTCATCTCTCAGGTCATATCCAACACACTGGGCCACCCACGCACAGGGACGA[CG]CGACAGCCCTGTGGCTCCACCGCACAGGACAGCCACGACTGGCAATCCTGTGCCGGCCCT	2	100984693	F	RPL31;RPL31;RPL31	1.37751	-0.0839628	0.00357866	-2.91542	2.91886	1202	RPL31	NA	6160	chr7:124940791:124940840:-
433	cg22809047	TCACATCTGTCATCTCTCAGGTCATATCCAACACACTGGGCCACCCACGCACAGGGACGA[CG]CGACAGCCCTGTGGCTCCACCGCACAGGACAGCCACGACTGGCAATCCTGTGCCGGCCCT	2	100984693	F	RPL31;RPL31;RPL31	1.37751	-0.0585241	0.0424939	-2.02965	2.03082	1202	RPL31	ribosomal protein L31	6160	chr2:223591255:223591304:+
433	cg22809047	TCACATCTGTCATCTCTCAGGTCATATCCAACACACTGGGCCACCCACGCACAGGGACGA[CG]CGACAGCCCTGTGGCTCCACCGCACAGGACAGCCACGACTGGCAATCCTGTGCCGGCCCT	2	100984693	F	RPL31;RPL31;RPL31	1.37751	-0.0859256	0.00286891	-2.98391	2.9876	1202	RPL31	NA	6160	chr14:59261344:59261393:+
433	cg22809047	TCACATCTGTCATCTCTCAGGTCATATCCAACACACTGGGCCACCCACGCACAGGGACGA[CG]CGACAGCCCTGTGGCTCCACCGCACAGGACAGCCACGACTGGCAATCCTGTGCCGGCCCT	2	100984693	F	RPL31;RPL31;RPL31	1.37751	-0.0876312	0.00235908	-3.04344	3.04736	1202	RPL31	ribosomal protein L31	6160	chr2:101618760:101618777:+,chr2:101619164:101619195:+
433	cg22809047	TCACATCTGTCATCTCTCAGGTCATATCCAACACACTGGGCCACCCACGCACAGGGACGA[CG]CGACAGCCCTGTGGCTCCACCGCACAGGACAGCCACGACTGGCAATCCTGTGCCGGCCCT	2	100984693	F	RPL31;RPL31;RPL31	1.37751	-0.0485936	0.0921864	-1.68466	1.68532	1202	RPL31	ribosomal protein L31	6160	chr12:6518809:6518858:-
434	cg22947000	TAGCTATGACACATGGCTTGGAAATTAACCTTTAACCAAACATCTTATAAGTAACGCCAG[CG]CAGCTTCCCTTGTGAATGTAAAGAGATCCAGGGCTCTTGGAGAGGGACAAGTGAGAGCCA	16	79829782	R	BCMO1	-7.87257	0.0296998	0.303553	1.02914	1.02929	1202	BCMO1	beta-carotene oxygenase 1	53630	chr16:81324668:81324717:+
435	cg22971191	AGGGGGATTCCAAGAGAGATTTTTGTAAATGTCAAATAGTCGACCTCATGCTGGGCAGAA[CG]CTGTATTTCAGTATACAGGGAAGATAAAGAAAGAGGTAGAGAAGAGATTGTCCTGTTTTC	13	102517707	F	SLC10A2	8.61389	0.047511	0.0996781	1.64707	1.64769	1202	SLC10A2	solute carrier family 10 member 2	6555	chr13:103696581:103696630:-
436	cg22983092	GACGAGGACAGGACCTCCTGGATGCACTGGAAAGTCGAAGAGACATGGTATCAGGGCAAA[CG]CGTTGCAGAGCTGTATTTGTGAAAGCCAGAATGGAGTGCCTTCTTGTCTAAAAGGTTTGG	17	36165064	F	KRT25;KRT25	0.434402	0.00514591	0.858547	0.178261	0.178262	1202	KRT25	keratin 25	147183	chr17:38904478:38904527:-
438	cg23124451	TCAGTCTCCCCATATTTACAATAAAAGGGGAGCGAGGTGGGATGGCGCTGAGGATCCCTA[CG]TCCGATCCTAATCTCCAGCTCAGGCAGGCTCGGCCGCCACTAGCATCCTGGAGCGACAAC	22	37878077	F	CBX7	-5.80486	-0.0335423	0.245225	-1.16238	1.1626	1202	CBX7	chromobox 7	23492	chr22:39527083:39527132:-
439	cg23127998	AGCTGTAATTCCATTGACAGTGAATTGGAGTAATAGCCCTCCCCCGTCTCCCAAGCTCTG[CG]TCCAGTCCACACAAAGCCCACGGCAGCTGCAGGCTGAGCTTGTCCTGCTTCAGATCACTC	20	14266152	F	FLRT3;MACROD2;FLRT3;FLRT3;FLRT3	1.68604	0.0300361	0.298108	1.04079	1.04095	1202	MACROD2	NA	140733	chr20:14032664:14032666:+,chr20:14033745:14033791:+
439	cg23127998	AGCTGTAATTCCATTGACAGTGAATTGGAGTAATAGCCCTCCCCCGTCTCCCAAGCTCTG[CG]TCCAGTCCACACAAAGCCCACGGCAGCTGCAGGCTGAGCTTGTCCTGCTTCAGATCACTC	20	14266152	F	FLRT3;MACROD2;FLRT3;FLRT3;FLRT3	1.68604	0.0383624	0.183806	1.32957	1.32989	1202	FLRT3	fibronectin leucine rich transmembrane protein 3	23767	chr20:14304873:14304922:-
439	cg23127998	AGCTGTAATTCCATTGACAGTGAATTGGAGTAATAGCCCTCCCCCGTCTCCCAAGCTCTG[CG]TCCAGTCCACACAAAGCCCACGGCAGCTGCAGGCTGAGCTTGTCCTGCTTCAGATCACTC	20	14266152	F	FLRT3;MACROD2;FLRT3;FLRT3;FLRT3	1.68604	0.0190314	0.509775	0.659346	0.659386	1202	FLRT3	fibronectin leucine rich transmembrane protein 3	23767	chr20:14309813:14309862:-
439	cg23127998	AGCTGTAATTCCATTGACAGTGAATTGGAGTAATAGCCCTCCCCCGTCTCCCAAGCTCTG[CG]TCCAGTCCACACAAAGCCCACGGCAGCTGCAGGCTGAGCTTGTCCTGCTTCAGATCACTC	20	14266152	F	FLRT3;MACROD2;FLRT3;FLRT3;FLRT3	1.68604	0.0285974	0.321862	0.990913	0.991048	1202	MACROD2	MACRO domain containing 2	140733	chr20:14665508:14665557:+
439	cg23127998	AGCTGTAATTCCATTGACAGTGAATTGGAGTAATAGCCCTCCCCCGTCTCCCAAGCTCTG[CG]TCCAGTCCACACAAAGCCCACGGCAGCTGCAGGCTGAGCTTGTCCTGCTTCAGATCACTC	20	14266152	F	FLRT3;MACROD2;FLRT3;FLRT3;FLRT3	1.68604	0.0279823	0.332383	0.96959	0.969717	1202	MACROD2	MACRO domain containing 2	140733	chr20:15177509:15177558:+
440	cg23152772	AAACGGAGACTCAGCAACGGGGCTGATTTGTCTGTGGACACACAGCGAACTGTAAGTCCC[CG]CCTCCCTCTGCACCCGCGTGCACCAGGGGGCTGCTGGGGGTGCGGGGACGCGGGAGACCT	9	132803453	R	FIBCD1;FIBCD1	2.58075	-0.0344737	0.232356	-1.19468	1.19492	1202	FIBCD1	fibrinogen C domain containing 1	84929	chr9:133777925:133777974:-
441	cg23159337	TCCTTGAGCACACACCTTCTCTCAACAAATGACAATACTTGGCAAACTGAACTCCTCCCA[CG]AGTCGCCCTCTGCTAGGAGGAATTGCTGGCTGCTCCCTGCTTATTGCATTCTCTCAGAGC	3	194755472	F	ATP13A4	-0.632208	0.0186385	0.518554	0.64573	0.645767	1202	ATP13A4	ATPase 13A4	84239	chr3:193120150:193120199:-
442	cg23173910	CCGGGGCTGCCTGGCCTCCTGGGTGCGGGAGGTGCCTCCAGATTGGCCTGGCTTCTGTGA[CG]CTGGCCCAGATCACACACCAGAGCCCTTGGTGGGCAGCGGCACCTGCAAGCATACTGCAG	2	73973782	R	ACTG2	-0.0477471	0.00938717	0.74509	0.325191	0.325196	1202	ACTG2	actin, gamma 2, smooth muscle, enteric	72	chr2:74146704:74146753:+
443	cg23191950	TTCCGTGTCTCAGATGGGGCCTGGGTCAAGTCCTGGGAGTTGATGGAGCGTTTCCCAAAT[CG]CAAAAGGAGAGGAGCTAGACTTACCTCCCCCTCCTGGGAAGTAATGCGCGACAAGAATTT	15	99236597	R	ALDH1A3	3.95852	0.021627	0.45379	0.749297	0.749355	1202	ALDH1A3	aldehyde dehydrogenase 1 family member A3	220	chr15:101456051:101456100:+
443	cg23191950	TTCCGTGTCTCAGATGGGGCCTGGGTCAAGTCCTGGGAGTTGATGGAGCGTTTCCCAAAT[CG]CAAAAGGAGAGGAGCTAGACTTACCTCCCCCTCCTGGGAAGTAATGCGCGACAAGAATTT	15	99236597	R	ALDH1A3	3.95852	-0.0191928	0.50619	-0.664941	0.664982	1202	ALDH1A3	aldehyde dehydrogenase 1 family member A3	220	chr15:101456751:101456800:+
444	cg23213217	ATAAATTAACAGTCAGATCTAGGGGCTCGATCAGATTTGTGTGTGTGTGTGTGCCGTGTG[CG]CGTGCACAGCATGTTCTTTGACTAGGAGGCACACCTGCTTTGGTTATCTTCTTTTTGTAA	1	222436778	F	DEGS1;DEGS1	1.44809	-0.10168	0.000414457	-3.5345	3.54063	1202	DEGS1	delta 4-desaturase, sphingolipid 1	8560	chr1:224381056:224381105:+
444	cg23213217	ATAAATTAACAGTCAGATCTAGGGGCTCGATCAGATTTGTGTGTGTGTGTGTGCCGTGTG[CG]CGTGCACAGCATGTTCTTTGACTAGGAGGCACACCTGCTTTGGTTATCTTCTTTTTGTAA	1	222436778	F	DEGS1;DEGS1	1.44809	-0.0455902	0.114156	-1.58039	1.58094	1202	DEGS1	delta 4-desaturase, sphingolipid 1	8560	chr1:224380266:224380315:+
445	cg23234999	GAGGCCTGCCCCAGCCTCAGGAGGAGGAGCCTGGCCCAGTCCGTTGCCAAGCCGAAGCAG[CG]GCATTTGGACAAAGCAGATCATCTGCAGGTATTATATACATGGGCAGTGCAAGGAGGGGG	15	21362298	F	MKRN3	2.7897	-0.200674	2.19295e-12	-7.04717	7.09588	1202	MKRN3	makorin ring finger protein 3	7681	chr15:23812834:23812883:+
446	cg23239039	TGGAGGTGCTGGGCAGGGGCGGCGCCCCCTTCCCTGGCCGCGGTGCGCCCTTGCGCCCGG[CG]CTTGGGTCCTGCGAGATGAGGGTCTAGAAATACACAGCACCACCCGACCCCCGCATCGGG	4	4440016	F	D4S234E;D4S234E	0.774553	-0.0149643	0.604249	-0.518417	0.518436	1202	D4S234E	neuron specific gene family member 1	27065	chr4:4420537:4420586:+
447	cg23338195	CAATATTCATTTTATTAGGCCATTGTGAGAGATCTCAGCTCAGCATAATGGGCAACTTCC[CG]TGACTCTGGGCCACTGGGTTATTCTGGGACTTAACTACTCTGAGTTTTCTCACTAGAAAG	8	118215599	R	SLC30A8	1.26438	0.0221905	0.442109	0.768828	0.768891	1202	SLC30A8	solute carrier family 30 member 8	169026	chr8:118188726:118188775:+
448	cg23376526	CTTCCGGCGGACTTGGCCTTTGCGGTGCGAGCTCTGTGCTGCAAAAGGGCTCTTCGAGCT[CG]CGCCCTGGCCGCGGCTGCCGCCGACCCGGAAGGTCCCGAGGGGGGCTGCAGCCTGGCCTG	1	152014742	R	SLC27A3	-7.47095	0.0194385	0.500761	0.673454	0.673496	1202	SLC27A3	solute carrier family 27 member 3	11000	chr1:153752520:153752569:+
449	cg23568913	TTTATCACCCTTTCGGTAAATAGTGGTCCCACGGCTCGGCCTGCTTTTGGAATGAAGCTA[CG]CTTGGTAAGTTCAACTCTCTTTCACAGCCCTCTCCACAGAAAGAACTCTGGAGTTCGTTC	22	29317549	R	PES1	-0.644985	-0.0102029	0.723808	-0.353451	0.353458	1202	PES1	pescadillo ribosomal biogenesis factor 1	23481	chr22:30972644:30972693:-
450	cg23668631	AGAGGGAACTCAGCAGGACAGTGAGGTGACCTTCGCTGTGGCTGTTCCTGGGGACTCTGC[CG]CCACCTCTTCCCCTAACGCCTCCGCGTGTGAATCCTCTGGCACCACCACTTGCCCCATAT	17	3743685	R	CAMKK1;CAMKK1	-3.15461	0.0347138	0.229119	1.203	1.20325	1202	CAMKK1	calcium/calmodulin dependent protein kinase kinase 1	84254	chr17:3768476:3768525:-
450	cg23668631	AGAGGGAACTCAGCAGGACAGTGAGGTGACCTTCGCTGTGGCTGTTCCTGGGGACTCTGC[CG]CCACCTCTTCCCCTAACGCCTCCGCGTGTGAATCCTCTGGCACCACCACTTGCCCCATAT	17	3743685	R	CAMKK1;CAMKK1	-3.15461	-0.00537576	0.8523	-0.186224	0.186224	1202	CAMKK1	calcium/calmodulin dependent protein kinase kinase 1	84254	chr17:3769207:3769256:-
451	cg23710218	GCTGACCCCGGGGAGCGTGGACTACGAGTTGGCGCCCAAGTCCAGAATCCGCGCGCACCG[CG]GTAAGCTGCGCCTTTTGAAAAGGCTATCTGTACTCCTTGGAACAAACCACCCCGGGCAAA	8	72919210	F	MSC;MSC	24.1587	-0.0645659	0.0251886	-2.23974	2.2413	1202	MSC	musculin	9242	chr8:72754161:72754210:-
452	cg23818978	TGTGCTCTGGAAAACACATCCCATCAGAGCTGAATCACCCACATGGACTGTTAGCTCAGG[CG]GGGAAACATTCAAGTCATTCAGGCCCAAGGAATAATCTATAGAAGTCAAAGGCAAGAGGA	11	117588449	F	AMICA1;AMICA1	3.60368	-0.045772	0.112719	-1.5867	1.58725	1202	AMICA1	junction adhesion molecule like	120425	chr11:118064949:118064998:-
453	cg23832061	GAGAGCGGGTAGCGGGGAGGGCCGCCCACGACGGAGGTTTCTCTGTGGTTACCTCAGCGG[CG]CTCTTCGCAATCTGAAAGTTGGGGCAGCTGAAGAGCCCCACCACCTTCACCTGCAGCGGC	6	109868360	F	PPIL6;PPIL6;SMPD2	-31.9025	-0.0196503	0.496105	-0.680794	0.680838	1202	PPIL6	peptidylprolyl isomerase like 6	285755	chr6:109721295:109721344:-
453	cg23832061	GAGAGCGGGTAGCGGGGAGGGCCGCCCACGACGGAGGTTTCTCTGTGGTTACCTCAGCGG[CG]CTCTTCGCAATCTGAAAGTTGGGGCAGCTGAAGAGCCCCACCACCTTCACCTGCAGCGGC	6	109868360	F	PPIL6;PPIL6;SMPD2	-31.9025	0.0132266	0.646875	0.45821	0.458223	1202	SMPD2	sphingomyelin phosphodiesterase 2	6610	chr6:109764809:109764858:+
454	cg24110063	CTGGGGCCTGGGGTCACCTCCCCTCTCTGGGCCAATCACCTGTTGAGTCTGGAGCACTGG[CG]GCTATTCTTAGGGGTTTCTATATTTAAAATGGGGCCTGACTGGCTTGAGGTCATCTCCAG	16	31347253	F	COX6A2	-1.0124	-0.027509	0.34063	-0.95318	0.9533	1202	COX6A2	cytochrome c oxidase subunit 6A2	1339	chr16:31439631:31439680:-
455	cg24125648	GGGACTATTCCTAGTTTATGAGGTGGTTAAGGATATCGGTGGGGTGGGCTGGAGCGGTGT[CG]GGTTAGGTCTGAGAGAAGGCCTCGCACAAAACACTGTACAAACCCGAAAGGAAGTCTGAG	15	41879898	F	SERINC4;C15orf63	7.12019	-0.0485769	0.0922981	-1.68408	1.68474	1202	SERINC4	NA	619189	chr15:44087304:44087353:-
456	cg24208206	AAAATAAAATCCCGCCATCCTCCCCCCTCCCCGCCCCACCCCCGCCAGGTTTCAACAGCA[CG]GACTCCAGTCCAGTGCAGTGCCGCCACACCAGAGACAACAGGTGTTTCGGGAAAAGACCC	3	46011575	F	FYCO1	22.5407	0.00724584	0.801849	0.251008	0.25101	1202	FYCO1	FYVE and coiled-coil domain containing 1	79443	chr3:45959659:45959708:-
457	cg24304712	AGGCGCCATGTCAGCCCGGGAAGTGGCCGTGCTGCTGCTGTGGCTGAGCTGCTATGGCTC[CG]CCCTTTGGAGGTAGAGAGACGCCAGTCGCAGGCGAGCGACTAGGCGGGGATTACCCCCGG	1	242691408	R	C1orf101;C1orf101	23.3004	-0.0677751	0.0187728	-2.3514	2.35321	1202	C1orf101	chromosome 1 open reading frame 101	257044	chr1:244798844:244798844:+,chr1:244803230:244803278:+
458	cg24332433	CCCGCACACGTGGCCCTCCCGCCTCCGGGCCCCGCCCCCTTGGCCGCAACTGGCAACTCC[CG]CCTGAAGAATAGATTCTCTGGTTCACAGCCGTCTGCAGGCTCAGGAACAGATCTGGGCGG	17	68600498	F	SLC39A11;SLC39A11	0.617734	-0.0278351	0.334934	-0.964486	0.964611	1202	SLC39A11	solute carrier family 39 member 11	201266	chr17:70642300:70642349:-
459	cg24407308	GTCGCGCAGCCCTGGCCCGAGGGTTCCCGGGGCACGGCCGCTGGGCCCCCGGTGGAGGAG[CG]TTTCCGCCAGCTGCACCTACGAAAGCAGGTGTCTTACAGGTAAGGAGGACGTGGGCAGAG	11	46311573	F	DGKZ	-12.9551	0.0203972	0.479873	0.706678	0.706727	1202	DGKZ	diacylglycerol kinase zeta	8525	chr11:46354751:46354800:+
459	cg24407308	GTCGCGCAGCCCTGGCCCGAGGGTTCCCGGGGCACGGCCGCTGGGCCCCCGGTGGAGGAG[CG]TTTCCGCCAGCTGCACCTACGAAAGCAGGTGTCTTACAGGTAAGGAGGACGTGGGCAGAG	11	46311573	F	DGKZ	-12.9551	-0.0020761	0.942679	-0.0719185	0.0719185	1202	DGKZ	diacylglycerol kinase zeta	8525	chr11:46369312:46369361:+
459	cg24407308	GTCGCGCAGCCCTGGCCCGAGGGTTCCCGGGGCACGGCCGCTGGGCCCCCGGTGGAGGAG[CG]TTTCCGCCAGCTGCACCTACGAAAGCAGGTGTCTTACAGGTAAGGAGGACGTGGGCAGAG	11	46311573	F	DGKZ	-12.9551	0.0312618	0.278817	1.08329	1.08347	1202	DGKZ	diacylglycerol kinase zeta	8525	chr11:46367069:46367118:+
460	cg24493940	CCACAAAGCGAGGAAGGGCAGGGGCTACGGAGTGGGGGCACCCCGAAAGCCTTGAGCCCC[CG]AGTTTGCTCGGTTGAGGGTGTTGGGGGCACAGGGATGCTGGCCCCCAGCTCCCCACTGGA	12	130879631	R	MMP17	-4.20214	0.053925	0.0616244	1.86983	1.87074	1202	MMP17	NA	NA	chr12:132325047:132325096:+
460	cg24493940	CCACAAAGCGAGGAAGGGCAGGGGCTACGGAGTGGGGGCACCCCGAAAGCCTTGAGCCCC[CG]AGTTTGCTCGGTTGAGGGTGTTGGGGGCACAGGGATGCTGGCCCCCAGCTCCCCACTGGA	12	130879631	R	MMP17	-4.20214	0.0228309	0.429048	0.791022	0.79109	1202	MMP17	matrix metallopeptidase 17	4326	chr12:132313197:132313198:+,chr12:132322740:132322787:+
460	cg24493940	CCACAAAGCGAGGAAGGGCAGGGGCTACGGAGTGGGGGCACCCCGAAAGCCTTGAGCCCC[CG]AGTTTGCTCGGTTGAGGGTGTTGGGGGCACAGGGATGCTGGCCCCCAGCTCCCCACTGGA	12	130879631	R	MMP17	-4.20214	0.0368707	0.201459	1.27782	1.27811	1202	MMP17	NA	NA	chr12:132329448:132329497:+
461	cg24505122	AATGGAAACTGCTAATTTTTGAAGCAGAAGGTTGACAGCTTCAGTAAGATCTCAAGAGAG[CG]AGAAGACTGGAATCAGGTGAGGCCATAACTTCTTATCTAAACTTAGTTTCTGGGGTGGAA	12	1596553	F	WNT5B;WNT5B	0.307545	-0.0638296	0.0269032	-2.21413	2.21564	1202	WNT5B	Wnt family member 5B	81029	chr12:1756061:1756110:+
461	cg24505122	AATGGAAACTGCTAATTTTTGAAGCAGAAGGTTGACAGCTTCAGTAAGATCTCAAGAGAG[CG]AGAAGACTGGAATCAGGTGAGGCCATAACTTCTTATCTAAACTTAGTTTCTGGGGTGGAA	12	1596553	F	WNT5B;WNT5B	0.307545	-0.0238012	0.409689	-0.824652	0.82473	1202	WNT5B	Wnt family member 5B	81029	chr12:1726254:1726303:+
462	cg24505341	GTGGGGGCTGGGCAGCGTGTTTGTCCCACCTGTGTAAACTCTGATTCCAGCAACTTATTC[CG]CATGCGCCCAGTCTAATTAAAATAAAAGTGAATCAAATTTTGAATGGATTGGTGTTTCGA	3	62836584	R	CADPS;CADPS;CADPS	2.84119	-0.0385441	0.181737	-1.33587	1.3362	1202	CADPS	calcium dependent secretion activator	8618	chr3:62499325:62499374:-
462	cg24505341	GTGGGGGCTGGGCAGCGTGTTTGTCCCACCTGTGTAAACTCTGATTCCAGCAACTTATTC[CG]CATGCGCCCAGTCTAATTAAAATAAAAGTGAATCAAATTTTGAATGGATTGGTGTTTCGA	3	62836584	R	CADPS;CADPS;CADPS	2.84119	-0.0245665	0.394792	-0.85118	0.851266	1202	CADPS	calcium dependent secretion activator	8618	chr3:62384395:62384444:-
462	cg24505341	GTGGGGGCTGGGCAGCGTGTTTGTCCCACCTGTGTAAACTCTGATTCCAGCAACTTATTC[CG]CATGCGCCCAGTCTAATTAAAATAAAAGTGAATCAAATTTTGAATGGATTGGTGTTTCGA	3	62836584	R	CADPS;CADPS;CADPS	2.84119	-0.02765	0.33816	-0.958068	0.95819	1202	CADPS	calcium dependent secretion activator	8618	chr3:62467416:62467465:-
463	cg24556026	GTGTGAATTGATGACCAAGGCATGGCAGAGCCTCTCTCATCTTTATAATCAGTTCAGCGG[CG]GCCTCCACTACAGGGAACTCCCAGCCAGTCCCGAGGCCTAGGGACATCCAGGGAGAAACG	9	36248971	F	GNE;GNE	1.41076	-0.0573102	0.0469774	-1.98746	1.98855	1202	GNE	glucosamine (UDP-N-acetyl)-2-epimerase/N-acetylmannosamine kinase	10020	chr9:36214675:36214724:-
464	cg24651706	CAGGCGCTTCCCACCAGCTACAGTCGGAGATTTGGAGCGCTTGTGTCTGAGGCTCAATCC[CG]TCAGGTGCCGCGCAACTCAGCGGCGCATTCTCTTTGGACCCGAGGCACCACCATACTTTC	2	113058343	R	CHCHD5	0.653433	0.00251263	0.930654	0.0870403	0.0870404	1202	CHCHD5	coiled-coil-helix-coiled-coil-helix domain containing 5	84269	chr2:113343829:113343878:+
465	cg24674703	GCCTGCTCCCCGTCCCACCCCTCCCTGAGCACGCCACCCCGCCCTCTCCCTCTCTGAGAG[CG]AGATACCCGGCCAGACACCCTCACCTGCGGTGCCCAGCTGCCCAGGCTGAGGCAAGAGAA	11	60626536	F	CD5;CD5	5.41797	0.107894	0.000178452	3.75215	3.7595	1202	CD5	CD5 molecule	921	chr11:60895042:60895091:+
466	cg24921089	CTCTGCGGTGGCCCGAGCCCCAGCGGCCTCAGGTGAGCGGGCAGCATCCCGATTCCCTGG[CG]GCCTAGAATGGAATCGCAAGGTTTAGAGAAATTAAGGGACCTGGGACTTGCCACCCTGGG	11	10429416	F	AMPD3	-4.98641	-0.00269707	0.925578	-0.0934293	0.0934294	1202	AMPD3	adenosine monophosphate deaminase 3	272	chr11:10528871:10528920:+
466	cg24921089	CTCTGCGGTGGCCCGAGCCCCAGCGGCCTCAGGTGAGCGGGCAGCATCCCGATTCCCTGG[CG]GCCTAGAATGGAATCGCAAGGTTTAGAGAAATTAAGGGACCTGGGACTTGCCACCCTGGG	11	10429416	F	AMPD3	-4.98641	-0.0545833	0.0585129	-1.8927	1.89364	1202	AMPD3	adenosine monophosphate deaminase 3	272	chr11:10472511:10472560:+
466	cg24921089	CTCTGCGGTGGCCCGAGCCCCAGCGGCCTCAGGTGAGCGGGCAGCATCCCGATTCCCTGG[CG]GCCTAGAATGGAATCGCAAGGTTTAGAGAAATTAAGGGACCTGGGACTTGCCACCCTGGG	11	10429416	F	AMPD3	-4.98641	0.0535117	0.0636473	1.85547	1.85636	1202	AMPD3	adenosine monophosphate deaminase 3	272	chr11:10476872:10476921:+
466	cg24921089	CTCTGCGGTGGCCCGAGCCCCAGCGGCCTCAGGTGAGCGGGCAGCATCCCGATTCCCTGG[CG]GCCTAGAATGGAATCGCAAGGTTTAGAGAAATTAAGGGACCTGGGACTTGCCACCCTGGG	11	10429416	F	AMPD3	-4.98641	-0.051765	0.0728099	-1.7948	1.7956	1202	AMPD3	adenosine monophosphate deaminase 3	272	chr11:10477752:10477801:+
467	cg25022327	ATACACATTTTTGGCCCCAACCTGCATCGACCAAGTCAGAAATTCTGCAGTGTGTGTTTT[CG]TAAGTCCTCCAGGTGACTCTGATGTACTCTCAGGGTTCAGAACCATTGAGAGAGAGCAGT	11	128317672	R	TP53AIP1	-0.0858806	-0.0337635	0.242125	-1.17005	1.17027	1202	TP53AIP1	tumor protein p53 regulated apoptosis inducing protein 1	63970	chr11:128806433:128806460:-,chr11:128805574:128805595:-
467	cg25022327	ATACACATTTTTGGCCCCAACCTGCATCGACCAAGTCAGAAATTCTGCAGTGTGTGTTTT[CG]TAAGTCCTCCAGGTGACTCTGATGTACTCTCAGGGTTCAGAACCATTGAGAGAGAGCAGT	11	128317672	R	TP53AIP1	-0.0858806	0.00332548	0.908307	0.115198	0.115199	1202	TP53AIP1	tumor protein p53 regulated apoptosis inducing protein 1	63970	chr11:128804704:128804753:-
467	cg25022327	ATACACATTTTTGGCCCCAACCTGCATCGACCAAGTCAGAAATTCTGCAGTGTGTGTTTT[CG]TAAGTCCTCCAGGTGACTCTGATGTACTCTCAGGGTTCAGAACCATTGAGAGAGAGCAGT	11	128317672	R	TP53AIP1	-0.0858806	-0.00391981	0.892012	-0.135787	0.135787	1202	TP53AIP1	tumor protein p53 regulated apoptosis inducing protein 1	63970	chr11:128807573:128807585:-,chr11:128806508:128806544:-
467	cg25022327	ATACACATTTTTGGCCCCAACCTGCATCGACCAAGTCAGAAATTCTGCAGTGTGTGTTTT[CG]TAAGTCCTCCAGGTGACTCTGATGTACTCTCAGGGTTCAGAACCATTGAGAGAGAGCAGT	11	128317672	R	TP53AIP1	-0.0858806	-0.00204028	0.943666	-0.0706776	0.0706777	1202	TP53AIP1	tumor protein p53 regulated apoptosis inducing protein 1	63970	chr11:128805534:128805583:-
468	cg25092328	TGACAGCCGGAGGTTCCAGCTGCGCGCCCACAGCCCCTCGGTAGCGCCGCCGACTCGTGG[CG]TCTATAGGCTGTTTCTGCGTCACTCATGCATGGAAGACCAATCAGAGAGCGTACTTGTCT	20	31771780	F	PXMP4;PXMP4;PXMP4;PXMP4	10.8011	0.0210976	0.464919	0.73095	0.731004	1202	PXMP4	peroxisomal membrane protein 4	11264	chr20:32291254:32291303:-
468	cg25092328	TGACAGCCGGAGGTTCCAGCTGCGCGCCCACAGCCCCTCGGTAGCGCCGCCGACTCGTGG[CG]TCTATAGGCTGTTTCTGCGTCACTCATGCATGGAAGACCAATCAGAGAGCGTACTTGTCT	20	31771780	F	PXMP4;PXMP4;PXMP4;PXMP4	10.8011	0.0218891	0.448336	0.75838	0.758441	1202	PXMP4	peroxisomal membrane protein 4	11264	chr20:32298379:32298428:-
468	cg25092328	TGACAGCCGGAGGTTCCAGCTGCGCGCCCACAGCCCCTCGGTAGCGCCGCCGACTCGTGG[CG]TCTATAGGCTGTTTCTGCGTCACTCATGCATGGAAGACCAATCAGAGAGCGTACTTGTCT	20	31771780	F	PXMP4;PXMP4;PXMP4;PXMP4	10.8011	-0.0500171	0.0830305	-1.73409	1.73481	1202	PXMP4	peroxisomal membrane protein 4	11264	chr20:32294804:32294853:-
468	cg25092328	TGACAGCCGGAGGTTCCAGCTGCGCGCCCACAGCCCCTCGGTAGCGCCGCCGACTCGTGG[CG]TCTATAGGCTGTTTCTGCGTCACTCATGCATGGAAGACCAATCAGAGAGCGTACTTGTCT	20	31771780	F	PXMP4;PXMP4;PXMP4;PXMP4	10.8011	0.0303666	0.29282	1.05225	1.05242	1202	PXMP4	peroxisomal membrane protein 4	11264	chr20:32290897:32290946:-
469	cg25136687	GTGCCCCCTCCTCTTTGCTGCTGCAGTGTCTGCGCCGGGCCATTTAATGAGATTTATTCA[CG]CACGGCTCTTCTCAGCTTTGCGAGGGGTTGGCAGATCCAGTGCACAGGGATTTCCCACTA	6	111911879	R	REV3L	-9.52214	0.0163059	0.572228	0.564903	0.564928	1202	REV3L	REV3 like, DNA directed polymerase zeta catalytic subunit	5980	chr6:111628723:111628772:-
470	cg25229964	GCACAGCTGCCCTTTGAAGTACGGTCTATTATATCTCTTTTACAGACCCAGAAACTGAGG[CG]CAGAAGTTAGGGTCAGCCCCAGGTCACACAGCTAACAAGAGCTGGCCTAGGCACCCAGGG	1	26376210	F	CNKSR1;CNKSR1	5.41073	-0.00750548	0.794905	-0.260002	0.260005	1202	CNKSR1	connector enhancer of kinase suppressor of Ras 1	10256	chr1:26516211:26516260:+
471	cg25251635	GGGGCGTGGGTGGGTCAGCGTTCCTTGGGGACCCGTGAAGCCTGGGCTTAGGGCTCACAG[CG]TGGGTCCCCAGCACAGACAGGAGGCGGACAGCTTCCCGTGAACTGCAGGGGAGTCCCGGG	7	100141106	R	POP7	2.24862	0.0172149	0.551	0.596401	0.59643	1202	POP7	POP7 homolog, ribonuclease P/MRP subunit	10248	chr7:100304752:100304801:+
472	cg25256723	CAAACTAGTGACTGTTTTACTGCAGGTGAAGAAGGGGCAGAGATCAGAGGCTCTAGCAGG[CG]GGACAATGCCCAGGGATTCATGAGCCGGACAAAGCTGTATCCCTCCATTTCCACCTGCCA	1	167822568	F	F5	-9.36845	-0.0134569	0.641154	-0.46619	0.466204	1202	F5	coagulation factor V	2153	chr1:169487678:169487727:-
473	cg25428451	GGAGCCCCTGGGATGACCCATCCCAAGGTCCCAGCCTAAGTCTGAGGTTCCAGGGCTGGT[CG]CAGGCCGTCCTTGCAGCCCTCGCCAGAGCGTTGTCTGCACCTCCGACACTAGGTGGCGCC	1	87370132	R	LOC339524;LOC339524;LOC339524;LOC339524;LOC339524	-13.6572	0.0303436	0.293187	1.05146	1.05162	1202	LOC339524	long intergenic non-protein coding RNA 1140	339524	chr1:87599877:87599926:+
474	cg25459323	GAGGGATGGTTGTCCTCACCCCTGTGAGGCAATATGCTGTCCATTAGTATCCACTGAATG[CG]TGAAATTTTTTTCTAATGGGCAAACTGAGGCTCAGAGAAGTTCCTGTCTGGCTCAAGGTT	22	40702305	R	SEPT3;SEPT3	-5.90053	0.00778311	0.787497	0.26962	0.269623	1202	2017-09-03	septin 3	55964	chr22:42394071:42394120:+
474	cg25459323	GAGGGATGGTTGTCCTCACCCCTGTGAGGCAATATGCTGTCCATTAGTATCCACTGAATG[CG]TGAAATTTTTTTCTAATGGGCAAACTGAGGCTCAGAGAAGTTCCTGTCTGGCTCAAGGTT	22	40702305	R	SEPT3;SEPT3	-5.90053	-0.0354413	0.219502	-1.22824	1.2285	1202	2017-09-03	septin 3	55964	chr22:42394018:42394067:+
475	cg25536676	TCCCGGGCGCGGAGGATGGAAACCTGGCGGTAACCTCTGCAGGTCGTGCCACTCGGTGTG[CG]CAAGGTCTCCAGAGGCATCTTTTCATTTTTAGGGGGCACTTTCCACGAATTCATTTGAGC	1	55125915	R	DHCR24	-2.83764	-0.243477	1.11211e-17	-8.60716	8.69599	1202	DHCR24	24-dehydrocholesterol reductase	1718	chr1:55315468:55315517:-
476	cg25713185	GCGCTTCCAGAAGGCTGCAAATGGGAATTCCAGACAAACCCACTTGGGTGAATCCCAGCA[CG]CGGGCTGCGGCGTAGGGGGAGAGCTCCTCACGCGGCTCAGAGTGTAGCCCAGGCCCGCAG	2	228290730	R	SLC19A3	2.256	0.00553274	0.848039	0.191662	0.191663	1202	SLC19A3	solute carrier family 19 member 3	80704	chr2:228549954:228550003:-
477	cg25769980	GGGAAAGTCTCAAAACTGTCAACTCTGATAGAAAGCTCATGTCAGAGACCTGAAGCTCAG[CG]ATGTAGTTCTGAGACATATCTAAGACTTTGGTTTTCAGCGGTAGGTCTTTTGGAACATGA	4	38507297	F	TLR6	-7.80884	-0.0130038	0.65243	-0.450489	0.450502	1202	TLR6	toll like receptor 6	10333	chr4:38828529:38828578:-
478	cg25881193	TCTACCTAGTAACAGCTGAGAAATAAGGCTCGAGACACCATTGGTTGGTTCAGCCTCACT[CG]GCCAATCCTGGGCTCTAAACTGCTCAGTGGAAATCTTGGGACTTTTTGGACACCCAGAGA	6	26491276	F	BTN2A2;BTN2A2	-15.999	0.0405265	0.16027	1.40465	1.40503	1202	BTN2A2	butyrophilin subfamily 2 member A2	10385	chr6:26394870:26394919:+
478	cg25881193	TCTACCTAGTAACAGCTGAGAAATAAGGCTCGAGACACCATTGGTTGGTTCAGCCTCACT[CG]GCCAATCCTGGGCTCTAAACTGCTCAGTGGAAATCTTGGGACTTTTTGGACACCCAGAGA	6	26491276	F	BTN2A2;BTN2A2	-15.999	0.0486502	0.0918077	1.68662	1.68729	1202	BTN2A2	butyrophilin subfamily 2 member A2	10385	chr6:26385477:26385526:+
479	cg25898500	CAGCCCACGTGACTACAGGGGCACTTGATGGGAATCATGGCAGCATCCAGGCCATTGTCC[CG]CTTCTGGGAGTGGGGAAAGAACATCGTCTGCGTGGGGAGGAACTACGCGGACCACGTCAG	16	1817265	R	HAGH;FAHD1;HAGH;FAHD1;FAHD1	-0.72502	0.0181109	0.530461	0.62745	0.627484	1202	FAHD1	fumarylacetoacetate hydrolase domain containing 1	81889	chr16:1878814:1878863:+
479	cg25898500	CAGCCCACGTGACTACAGGGGCACTTGATGGGAATCATGGCAGCATCCAGGCCATTGTCC[CG]CTTCTGGGAGTGGGGAAAGAACATCGTCTGCGTGGGGAGGAACTACGCGGACCACGTCAG	16	1817265	R	HAGH;FAHD1;HAGH;FAHD1;FAHD1	-0.72502	0.00325766	0.910169	0.112849	0.112849	1202	FAHD1	fumarylacetoacetate hydrolase domain containing 1	81889	chr16:1877805:1877854:+
479	cg25898500	CAGCCCACGTGACTACAGGGGCACTTGATGGGAATCATGGCAGCATCCAGGCCATTGTCC[CG]CTTCTGGGAGTGGGGAAAGAACATCGTCTGCGTGGGGAGGAACTACGCGGACCACGTCAG	16	1817265	R	HAGH;FAHD1;HAGH;FAHD1;FAHD1	-0.72502	-0.000300107	0.991707	-0.010396	0.010396	1202	FAHD1	fumarylacetoacetate hydrolase domain containing 1	81889	chr16:1889836:1889885:+
479	cg25898500	CAGCCCACGTGACTACAGGGGCACTTGATGGGAATCATGGCAGCATCCAGGCCATTGTCC[CG]CTTCTGGGAGTGGGGAAAGAACATCGTCTGCGTGGGGAGGAACTACGCGGACCACGTCAG	16	1817265	R	HAGH;FAHD1;HAGH;FAHD1;FAHD1	-0.72502	0.0536468	0.0629803	1.86016	1.86106	1202	FAHD1	fumarylacetoacetate hydrolase domain containing 1	81889	chr16:1878353:1878402:+
479	cg25898500	CAGCCCACGTGACTACAGGGGCACTTGATGGGAATCATGGCAGCATCCAGGCCATTGTCC[CG]CTTCTGGGAGTGGGGAAAGAACATCGTCTGCGTGGGGAGGAACTACGCGGACCACGTCAG	16	1817265	R	HAGH;FAHD1;HAGH;FAHD1;FAHD1	-0.72502	0.0184681	0.522383	0.639827	0.639864	1202	HAGH	hydroxyacylglutathione hydrolase	3029	chr16:1869137:1869186:-
479	cg25898500	CAGCCCACGTGACTACAGGGGCACTTGATGGGAATCATGGCAGCATCCAGGCCATTGTCC[CG]CTTCTGGGAGTGGGGAAAGAACATCGTCTGCGTGGGGAGGAACTACGCGGACCACGTCAG	16	1817265	R	HAGH;FAHD1;HAGH;FAHD1;FAHD1	-0.72502	0.0610225	0.0343949	2.11651	2.11783	1202	HAGH	hydroxyacylglutathione hydrolase	3029	chr16:1859234:1859283:-
480	cg26022315	AGGAGGATCTCTGTAAATTGTTTTCTTAGGGAGAAGGATAGGGTGAAGGAGTAGAATCGA[CG]ACTGTAGATTTGTGAGTAGAATCCCATTTGTAGTTAAACTTGGGTAAATGGGAGAAAGGG	17	44376803	F	SNF8	-2.27088	0.0234014	0.417601	0.810796	0.81087	1202	SNF8	SNF8, ESCRT-II complex subunit	11267	chr17:47007766:47007815:-
481	cg26091688	GCCTCTCTGTGGTTCTGCCTGGAAGACGGAAGGCAGGTGGTTGGCTCTAGTCATCCACGA[CG]GGCTGGCACCTCTCCAGCTGCGGCCAGTCTAACCCCAGGGCCTGCTGGGAAATGTAGTTC	16	3225404	F	ZNF200;ZNF200;ZNF200;ZNF200;ZNF200;ZNF200;ZNF200;ZNF200;ZNF200;ZNF200	-17.949	0.0328728	0.254779	1.13916	1.13936	1202	ZNF200	zinc finger protein 200	7752	chr16:3284802:3284851:-
481	cg26091688	GCCTCTCTGTGGTTCTGCCTGGAAGACGGAAGGCAGGTGGTTGGCTCTAGTCATCCACGA[CG]GGCTGGCACCTCTCCAGCTGCGGCCAGTCTAACCCCAGGGCCTGCTGGGAAATGTAGTTC	16	3225404	F	ZNF200;ZNF200;ZNF200;ZNF200;ZNF200;ZNF200;ZNF200;ZNF200;ZNF200;ZNF200	-17.949	-0.0366757	0.203854	-1.27105	1.27134	1202	ZNF200	zinc finger protein 200	7752	chr16:3273898:3273947:-
481	cg26091688	GCCTCTCTGTGGTTCTGCCTGGAAGACGGAAGGCAGGTGGTTGGCTCTAGTCATCCACGA[CG]GGCTGGCACCTCTCCAGCTGCGGCCAGTCTAACCCCAGGGCCTGCTGGGAAATGTAGTTC	16	3225404	F	ZNF200;ZNF200;ZNF200;ZNF200;ZNF200;ZNF200;ZNF200;ZNF200;ZNF200;ZNF200	-17.949	-0.0300832	0.297351	-1.04243	1.04258	1202	ZNF200	zinc finger protein 200	7752	chr16:3272698:3272747:-
482	cg26096837	GCGCCCCTGGCGTCCGGGCAGGTGCCAGGTGAGGAAAGAAATGGGGGCCGCTCCATGAAG[CG]GTTCCTGCCAATAAAGAAAACGACATCCAGAGAATACCCAGGCGGGGAATAAAGGGGTCC	11	69229155	F	FGF19	7.26915	0.0216406	0.453505	0.749771	0.749829	1202	FGF19	fibroblast growth factor 19	9965	chr11:69513152:69513201:-
483	cg26104204	CAGCACGGGCGGGGGGCAGGGGCTGGGGCCGACCGGGAGGCCGGTGCCAAGGATGGGGGC[CG]CCCGGCTGCCCCGCGCGTGAGGAGGCCGAGGGGCGCGCCACCCCGGCCCGGGGCGGCCGC	19	45389265	R	MAP3K10	-5.7681	0.00549299	0.849118	0.190285	0.190286	1202	MAP3K10	mitogen-activated protein kinase kinase kinase 10	4294	chr19:40721400:40721449:+
484	cg26109803	TAATCTCTTCTTTGGACGTTTGGCAGCTCCATTTCACCTCCCCTTAACTCTGTTTGGGAT[CG]CTTACACACCAAGGAAGTTGGGCTTTGAGAATTCCATCCCACTGGCACTGAGGAGAATAT	10	102212788	R	WNT8B	-3.98456	-0.00561428	0.845827	-0.194486	0.194487	1202	WNT8B	Wnt family member 8B	7479	chr10:102243280:102243329:+
485	cg26201213	CAGCCTTTCCCCGGGCCTGGGGTTCCTGGACTAGGCTGCGCTGCAGTGACTGTGGACTGG[CG]TGTGGCGGGGGTCGTGGCAGCCCCTGCCTTACCTCTAGGTGCCAGCCCCAGGCCCGGGCC	10	131155786	R	MGMT	5.4463	-0.23311	2.68898e-16	-8.22639	8.30393	1202	MGMT	O-6-methylguanine-DNA methyltransferase	4255	chr10:131565247:131565296:+
486	cg26212924	GGCTTTCCCGAATGGCGCGCCCAGGACGGCTCTTGCGGCTGGCTGTCCAAACTGGGCCCG[CG]TCCTGAAGTGACCCCAGCCTGATCTCGGCCAGCTGCTTGTGACCTTGGCCTGTCCCAGCA	8	145222427	F	CYC1	-8.26945	0.0141152	0.624922	0.488997	0.489013	1202	CYC1	cytochrome c1	1537	chr8:145152249:145152298:+
487	cg26219051	CCTGGCCGGCCGGCTCGCTAGGCGCGGGGTCTAGGCCAGGCTGGGGCTGCTTGGAGGCTG[CG]CCCTCCCCTGCCCGCGGCGCCCCGGCCCCCGCCGTCGAGAGTGGACGCCCCTCTGGGGTA	22	42069573	R	SCUBE1	1.04657	0.0151585	0.599564	0.525147	0.525168	1202	SCUBE1	signal peptide, CUB domain and EGF like domain containing 1	80274	chr22:43600040:43600089:-
488	cg26312920	CTCTAAAAAGTGACATTGATGCCAACTGCCAGAGCTGGTACCCATGCCATCTGCTAGTGA[CG]TCACAGGGCAGAGAGAGCCATGTGATCCTCTCTCTTGGGACCTTCATTCTGCACTGATCA	7	31346915	R	NEUROD6;NEUROD6	-1.18281	0.0429357	0.136827	1.48825	1.48871	1202	NEUROD6	neuronal differentiation 6	63974	chr7:31377985:31378034:-
489	cg26350286	GTTTGCACTGAAAGTTGTGTTGGCTCAGGAGCTGCTTTTCCGGGGATCTGCAGTTGCCCC[CG]CCACCTCCTGGCTGCGGTTGGCAGGTCCCTCCCTCAGCAGTTCGTCCTCCGCCTGCGCCG	8	95721867	R	ESRP1;ESRP1;ESRP1;ESRP1;ESRP1	-1.26124	0.00897399	0.755945	0.310876	0.310881	1202	ESRP1	epithelial splicing regulatory protein 1	54845	chr8:95704950:95704999:+
490	cg26357744	CAAGGAGGGAGCAGGAGCATTCGAACGCGGAAATCGAGGTGCTAGTCCAAACTGCTCGGT[CG]GCTTTAGTCATAGCTGGATAATGCCCGGCTCAGGTCTACCACAAGCCATACAGCTGCTTT	3	50349308	F	RASSF1;RASSF1;RASSF1;RASSF1	-10.002	-0.0384662	0.182622	-1.33317	1.3335	1202	RASSF1	Ras association domain family member 1	11186	chr3:50367709:50367758:-
490	cg26357744	CAAGGAGGGAGCAGGAGCATTCGAACGCGGAAATCGAGGTGCTAGTCCAAACTGCTCGGT[CG]GCTTTAGTCATAGCTGGATAATGCCCGGCTCAGGTCTACCACAAGCCATACAGCTGCTTT	3	50349308	F	RASSF1;RASSF1;RASSF1;RASSF1	-10.002	-0.0473429	0.100884	-1.64123	1.64185	1202	RASSF1	Ras association domain family member 1	11186	chr3:50367459:50367508:-
490	cg26357744	CAAGGAGGGAGCAGGAGCATTCGAACGCGGAAATCGAGGTGCTAGTCCAAACTGCTCGGT[CG]GCTTTAGTCATAGCTGGATAATGCCCGGCTCAGGTCTACCACAAGCCATACAGCTGCTTT	3	50349308	F	RASSF1;RASSF1;RASSF1;RASSF1	-10.002	-0.0142363	0.621955	-0.493193	0.493209	1202	RASSF1	Ras association domain family member 1	11186	chr3:50375613:50375662:-
490	cg26357744	CAAGGAGGGAGCAGGAGCATTCGAACGCGGAAATCGAGGTGCTAGTCCAAACTGCTCGGT[CG]GCTTTAGTCATAGCTGGATAATGCCCGGCTCAGGTCTACCACAAGCCATACAGCTGCTTT	3	50349308	F	RASSF1;RASSF1;RASSF1;RASSF1	-10.002	-0.0134294	0.641836	-0.465237	0.465251	1202	RASSF1	Ras association domain family member 1	11186	chr3:50374641:50374690:-
491	cg26382071	TTGTTACGGGCGCGGTGGTGCAGGGGCAAATCGGGACTGGGATTTGGTCCTTACCCTTAA[CG]TGGCTCTAAGACCAGAAGGGAACACCTGACTTGTGTTGACCTCTTCAGTTAGCTGCAGGT	17	6485627	F	KIAA0753;TXNDC17	40.4209	0.0806858	0.00512578	2.80113	2.80418	1202	KIAA0753	KIAA0753	9851	chr17:6481965:6482014:-
491	cg26382071	TTGTTACGGGCGCGGTGGTGCAGGGGCAAATCGGGACTGGGATTTGGTCCTTACCCTTAA[CG]TGGCTCTAAGACCAGAAGGGAACACCTGACTTGTGTTGACCTCTTCAGTTAGCTGCAGGT	17	6485627	F	KIAA0753;TXNDC17	40.4209	-0.0159936	0.57961	-0.554082	0.554106	1202	KIAA0753	NA	NA	chr17:6542822:6542871:-
491	cg26382071	TTGTTACGGGCGCGGTGGTGCAGGGGCAAATCGGGACTGGGATTTGGTCCTTACCCTTAA[CG]TGGCTCTAAGACCAGAAGGGAACACCTGACTTGTGTTGACCTCTTCAGTTAGCTGCAGGT	17	6485627	F	KIAA0753;TXNDC17	40.4209	0.021058	0.465758	0.729578	0.729632	1202	KIAA0753	NA	NA	chr17:6538909:6538956:-
491	cg26382071	TTGTTACGGGCGCGGTGGTGCAGGGGCAAATCGGGACTGGGATTTGGTCCTTACCCTTAA[CG]TGGCTCTAAGACCAGAAGGGAACACCTGACTTGTGTTGACCTCTTCAGTTAGCTGCAGGT	17	6485627	F	KIAA0753;TXNDC17	40.4209	-0.0620294	0.0315247	-2.15152	2.15291	1202	TXNDC17	thioredoxin domain containing 17	84817	chr17:6545643:6545644:+,chr17:6546271:6546318:+
492	cg26394737	TGAAAACACAGCAAGGGCCCCACTAGCTGAAACCAAGTTGCAGAGTTTTGAGGGTCCCAC[CG]CCGACCGCCGGCCCGCCGCGAGCCCTGCCCCCTGCGCGGCCACGCCCCCTTGCTCCCCGC	14	22136921	R	ABHD4	7.25928	-0.00228689	0.936871	-0.0792202	0.0792203	1202	ABHD4	abhydrolase domain containing 4	63874	chr14:23080980:23081029:+
493	cg26394940	TAAATAAATAAGGGCTTTTGTTTGTTTGCCGGCTCCTGCACATGGCTGCTGGGACTCAAG[CG]CTCGTGTTGTCTGCGCCTCTGTGGGACTCTGGGGACGGGAGGCAGGGGAGGCCCCCGCAG	22	44828125	R	C22orf26;LOC150381	-0.852196	0.0561123	0.0517854	1.94583	1.94685	1202	C22orf26	proline rich 34	55267	chr22:46446477:46446526:-
494	cg26581729	GAGGCTCTGAGGCTGCAACAGTCTCCCTCCTATTGAAGCTAGAACAGCACCCCGAGCCTG[CG]CCATAAGTGCCCCCAGAACTTCAGCGCCCACCATGGCGCACAAGGCCGGTGCCCAGCGCC	9	139059613	F	NPDC1	-3.99884	-0.0205301	0.477017	-0.711282	0.711332	1202	NPDC1	neural proliferation, differentiation and control 1	56654	chr9:139935266:139935281:-,chr9:139935156:139935189:-
495	cg26614073	CTTGGGCAACGTAGGAGACCTCCGTCTCCACAAGTAAAATTAATTAGCCGGCTGTGGTGG[CG]CGCACCTGTGGTCCCAGCTACTCAGGAGGCTGAGGTAGGAGGATCACCTGAGCCCGGGAG	3	47492823	R	SCAP	-2.02651	-0.0741833	0.0100881	-2.57451	2.57688	1202	SCAP	SREBF chaperone	22937	chr3:47455244:47455293:-
496	cg26665419	GAGGCTGAGGCAGGAGAATGGCGTGAACCCGGGAGAATGGTGTGCCCCGAGCCTACTTCC[CG]CGCAGTCCTCCAAGACGCGGCCTCCAGCAGGGGTCGCTGCTTCGCTGCCGCCCTGGCCTC	6	107455983	R	C6orf203;C6orf203;C6orf203	-11.1543	0.0355779	0.217729	1.23298	1.23324	1202	C6orf203	chromosome 6 open reading frame 203	51250	chr6:107361400:107361434:+,chr6:107365464:107365478:+
497	cg26711820	GCCAGGACCAAATGCCCCCGGAAGCGGGGAGCGACAGCAGCGGAGAGGAACATGTCCTGG[CG]CCCCCGGGCCTGCAGCCTCCACACTGCCCCGGCCAGTGTCTGATCTGGGCTTGCAAGACC	12	79625820	F	MYF6	2.55842	0.0357878	0.215026	1.24026	1.24052	1202	MYF6	myogenic factor 6	4618	chr12:81102714:81102763:+
497	cg26711820	GCCAGGACCAAATGCCCCCGGAAGCGGGGAGCGACAGCAGCGGAGAGGAACATGTCCTGG[CG]CCCCCGGGCCTGCAGCCTCCACACTGCCCCGGCCAGTGTCTGATCTGGGCTTGCAAGACC	12	79625820	F	MYF6	2.55842	-0.000881026	0.975658	-0.0305196	0.0305197	1202	MYF6	myogenic factor 6	4618	chr12:81102903:81102952:+
498	cg26746469	GCTTGGACACTTGCAGCATGTTGCCTCTGCCAACTGCCTAGAATTTAAGCCTGACTTTGC[CG]CCTTACTGACCCCAGCAACTTAACCTGTCTGTGCCTTAATTTTCTTATCTACAGAATGGA	20	36096704	R	KIAA0406;RPRD1B	3.86614	0.00290864	0.919759	0.100758	0.100759	1202	RPRD1B	regulation of nuclear pre-mRNA domain containing 1B	58490	chr20:36720111:36720160:+
499	cg26815229	AAAGTTAAGTACTAAGTATGTGGTGAACAAATAAATCCACCCTTCTGAAACACATCTAAA[CG]AGGTCCTGTATTTGAAAGTGTCTGGAAGATTAAAAGGCACTACACCAAAGCTGCTAGCAC	1	60165521	F	CYP2J2	-17.1474	0.00035111	0.990298	0.0121628	0.0121628	1202	CYP2J2	cytochrome P450 family 2 subfamily J member 2	1573	chr1:60359238:60359287:-
500	cg26824091	GGACTGGTACAGGACAGGCATCTTTGAACCTATTTCTGGGAGTTCTGAAACTACTGTTCT[CG]TGGGCCTTGGCGACTGATTTGGGAAAGCTGACCCTGGGTTGGCCTGGCTTCCAGCCACCG	6	38778415	R	GLO1	4.58693	-0.07915	0.00604052	-2.74758	2.75047	1202	GLO1	glyoxalase I	2739	chr6:38644162:38644211:-
501	cg26842024	CGACGACGACCTCAACAGCGTGCTGGACTTCATCCTGTCCATGGGGCTGGATGGCCTGGG[CG]CCGAGGCCGCCCCGGAGCCGCCGCCGCCGCCCCCGCCGCCTGCGTTCTATTACCCCGAAC	19	16297122	R	KLF2	0.0638347	0.0948155	0.00099747	3.2944	3.29937	1202	KLF2	Kruppel like factor 2	10365	chr19:16438231:16438280:+
502	cg26866325	ACAAAGTGATCTGGCACAGCTGCAGGGTGGCATTGAGTCTGAGGCTTATGGTGCAGAAGC[CG]AAGTTAAAGATGTTTCTAGAGCCTGAAGACTTCCTCTTGAGGGTGAGTTGCTGCCTACAA	4	75139423	R	PPBPL2	9.37287	-0.0106975	0.711007	-0.370585	0.370592	1202	PPBPL2	pro-platelet basic protein pseudogene 2	10895	chr4:74920327:74920376:-
503	cg26898166	CGCGGGTGGAAGGTGAAGGTCGAGGGAGGTCAGGCTGCTTCTGCGTGTCCTGACGGCTGG[CG]TGTTCTCTTGAGATGGGCTCGGGCTACTTGGCCAGCTTCAATTTAAGCCACAGTGTCTCC	2	72997307	F	EMX1	-2.24451	0.00854998	0.767136	0.296187	0.296191	1202	EMX1	empty spiracles homeobox 1	2016	chr2:73161231:73161280:+
503	cg26898166	CGCGGGTGGAAGGTGAAGGTCGAGGGAGGTCAGGCTGCTTCTGCGTGTCCTGACGGCTGG[CG]TGTTCTCTTGAGATGGGCTCGGGCTACTTGGCCAGCTTCAATTTAAGCCACAGTGTCTCC	2	72997307	F	EMX1	-2.24451	0.0327935	0.255928	1.13641	1.13661	1202	EMX1	empty spiracles homeobox 1	2016	chr2:73161234:73161283:+
504	cg26932976	CCCAGCCCACGGCGGCCCGCGAGGGACAAAACGCGCCGCGCCTGGTTCCCCGCCCACGGA[CG]CGGTGACTTTCCAGAACGTCTTAAAGGCAACGCACTCTGACTCAAGGCCCAGGGAGGCTG	17	2561936	F	KIAA0664	-3.25915	-0.00936084	0.74578	-0.324278	0.324283	1202	KIAA0664	clustered mitochondria homolog	23277	chr17:2592991:2593040:-
506	cg27187881	CCTGTCTTCAGCAGCATCGCTCTGGACTCAGCTTCCGAGGACCTGACCAGATCTGGTCTG[CG]TGTATCAGCTGTATGTGTTGGGCTCTGGAAGCTAAGAAACGTCTGAAAAGCACTGGGGTC	22	40796291	F	NAGA;NAGA	-33.5456	0.0265142	0.358385	0.918693	0.918801	1202	NAGA	alpha-N-acetylgalactosaminidase	4668	chr22:42454864:42454913:-
507	cg27244482	TGCCCCGGTAACTGCCTCCCCAACACCTGCCTGCCTTCCACTGCGAAACCTGCTCTCGGA[CG]CCCTGACCATACCGCACACAATACTGCAAGCCTGTGTGGGCCTGGGGGTGGGATGGACCC	5	149649681	F	CAMK2A;CAMK2A	-0.0319814	0.00231768	0.936022	0.080287	0.080287	1202	CAMK2A	calcium/calmodulin dependent protein kinase II alpha	815	chr5:149599323:149599372:-
508	cg27367952	GATGGCCCTTTAAGAGGCACTGTCCAGCTCTGGTTGCCATGGAGACAGCTGGACACAGAC[CG]GGTAGAGGCAGGCCCACAGCATGTCCTCCAAGGTTTACTCCACAGGTGGGAAGAGGACTG	2	218929830	R	C2orf62;C2orf62	-15.8238	-0.0183995	0.523931	-0.637448	0.637484	1202	C2orf62	ciliogenesis associated TTC17 interacting protein	375307	chr2:219232482:219232531:+
509	cg27440834	CTGGGATTACAGGCGTGAGCCACTGCGCCTGGCCTTTGCAAGGTTTTGAGGAAAGTGAAG[CG]TTCTGTTGAAGCAGGGCTTGAGTTCTGTTGTAAGTGTTTCATGAAGCCCTGGAGACCTCT	3	126722531	F	SNX4	0.0339802	0.028476	0.323922	0.986703	0.986836	1202	SNX4	sorting nexin 4	8723	chr3:125165816:125165865:-
510	cg27493997	TCAGGTTCTGGAACCAAGACAAGTCCAGGGACAACCCCAAAGCTGGCCTGGGCTCCCGCG[CG]GACAGCTTTTATACCCTGTACGGAACCGCCCCTGCCCAGGATTGAAGTGGCCCCGCCTCC	1	154942016	F	CRABP2	-21.2007	0.0113493	0.694259	0.393169	0.393177	1202	CRABP2	cellular retinoic acid binding protein 2	1382	chr1:156669520:156669569:-
511	cg27514224	AGGTGGAAATACTTTCGGGCGATGGTGGGGGCCTGGTGCTTCTTGGACTCGGAAGATGAC[CG]CTTGGCATTCTGGTACAGCACCACCAGGCAGGCCAAGGTGGCCAGCAGAGACCAATAGGC	9	130748439	R	NUP188;DOLK	-4.39095	0.00451894	0.875632	0.156542	0.156542	1202	DOLK	dolichol kinase	22845	chr9:131708031:131708080:-
511	cg27514224	AGGTGGAAATACTTTCGGGCGATGGTGGGGGCCTGGTGCTTCTTGGACTCGGAAGATGAC[CG]CTTGGCATTCTGGTACAGCACCACCAGGCAGGCCAAGGTGGCCAGCAGAGACCAATAGGC	9	130748439	R	NUP188;DOLK	-4.39095	-0.0330977	0.251542	-1.14696	1.14717	1202	NUP188	nucleoporin 188	23511	chr9:131769124:131769173:+
512	cg27626102	GAACCAGGGCCCTTGGCGAGAGTTGGGGTGGGAATCGCGTAAGAAAAGCAATTTCTAGAG[CG]GAAAGGTGACCCCACATTACAAAAAGAAATGGAGTAGAAAAATAGGCTTGACTATTCTAA	7	89678667	F	STEAP2;STEAP2	-1.46574	0.00715328	0.804329	0.247801	0.247803	1202	STEAP2	STEAP2 metalloreductase	261729	chr7:89866338:89866387:+
512	cg27626102	GAACCAGGGCCCTTGGCGAGAGTTGGGGTGGGAATCGCGTAAGAAAAGCAATTTCTAGAG[CG]GAAAGGTGACCCCACATTACAAAAAGAAATGGAGTAGAAAAATAGGCTTGACTATTCTAA	7	89678667	F	STEAP2;STEAP2	-1.46574	0.0491279	0.0886592	1.70321	1.7039	1202	STEAP2	STEAP2 metalloreductase	261729	chr7:89866434:89866483:+
512	cg27626102	GAACCAGGGCCCTTGGCGAGAGTTGGGGTGGGAATCGCGTAAGAAAAGCAATTTCTAGAG[CG]GAAAGGTGACCCCACATTACAAAAAGAAATGGAGTAGAAAAATAGGCTTGACTATTCTAA	7	89678667	F	STEAP2;STEAP2	-1.46574	-0.032629	0.258322	-1.1307	1.1309	1202	STEAP2	STEAP2 metalloreductase	261729	chr7:89841062:89841111:+
513	cg27655905	CTATCAGCCTAACGATTAAGTCAACATGCTAAGCAGCCACACGGGGGCTACTAAGTGACT[CG]CACGGGGGAAGCAGGCAGGGAGACAGATGGGCAGGGGAGGGAATCTGGGGCAATGCACAA	11	67795364	R	C11orf24	9.95042	-0.0410003	0.155434	-1.42109	1.42149	1202	C11orf24	chromosome 11 open reading frame 24	53838	chr11:68028874:68028923:-

## Sheet: FHS_PBMC_cpgNeigborCors
SEQIDNO	Probe	SequenceWithCpGMarked	ChromosomeBuilt36	PositionBuilt36	Strand	Gene	Coefficient	Age.ID	Age.cor	Age.Z	Age.pvalueStudent	Age.qvalueStudent	Age.AreaUnderROC	Age.nPresentSamples	AAP.ID	AAP.cor	AAP.Z	AAP.pvalueStudent	AAP.qvalueStudent	AAP.AreaUnderROC	AAP.nPresentSamples	Gran.ID	Gran.cor	Gran.Z	Gran.pvalueStudent	Gran.qvalueStudent	Gran.AreaUnderROC	Gran.nPresentSamples	ID	GB_LIST	SPOT_ID	seqname	RANGE_GB	RANGE_STRAND	RANGE_START	RANGE_STOP	total_probes	category	ncbi	symbol	name
1	cg00079056	TAAAAATGATCATTTCTGCTTACGTTTACAGCTCATTTCATATTCTGCAAAATGTTTTCC[CG]TCTGCTATCACCGCCGCCATCCTCACAGCAGCCTGGGAGAAAGGCAGAGCCAAAAGTCTC	9	33229641	R	SUGT1P1;SPINK4	0.122818	3166815	-0.0207545	-0.970507	0.331866	0.0959342	0.49302	2188	3166815	-0.0119086	-0.556811	0.577705	0.26119	0.495942	2188	3166815	0.0388509	1.81738	0.0692262	0.0106684	0.511553	2188	3166815	NM_014471,AF048700	chr9:33208383-33242278	chr9	NC_000009.10	+	33208383	33242278	78	main	NM_014471	SPINK4	serine peptidase inhibitor, Kazal type 4
2	cg00083937	GCCCTGCGGGAAGGGACTGGGGTTGGGAGGACGCTGGGCCTCTGGGTTTAGGCCTCACTC[CG]CCGGAGAGGGGGAGACAAACAGGCCAGACTCTCTTCCCAGAGCAGGAGCGACCCCTCCCC	22	49386671	R	MAPK8IP2	0.0305773	3950974	0.0349659	1.63548	0.102022	0.035219	0.512552	2188	3950974	-0.0215704	-1.00867	0.313206	0.167476	0.491406	2188	3950974	0.0669382	3.13436	0.00173129	0.000322977	0.524402	2188	3950974	NM_012324,NM_016431,AF136382,AK094442	chr22:49385997-49399270	chr22	NC_000022.9	+	49385997	49399270	133	main	NM_012324	MAPK8IP2	mitogen-activated protein kinase 8 interacting protein 2
3	cg00113951	GCGTTTGTAGGCAGTGATGTCACAGAGTGCCTTCATGCTCCTCGGGTCTCCGGTTCTCCC[CG]GACCTCTGTAGTCCTCATTGCCAAAGTTGTACCCCCTGGGGAGTGCACCCTGCCTGCATT	12	119562473	F	CABP1	4.0267	3434490	0.0392627	1.83666	0.0663262	0.0244109	0.515073	2188	3434490	0.0440849	2.06251	0.0392133	0.0332486	0.511644	2188	3434490	0.128874	6.05914	1.44848e-09	4.77493e-10	0.542549	2188	3434490	NM_001033677,NM_031205,NM_004276,AK127203	chr12:119562763-119589508	chr12	NC_000012.10	+	119562763	119589508	106	main	NM_001033677	CABP1	calcium binding protein 1
4	cg00168942	CTTTGCTTTCTTATCTCCAGCTCACACCTTTAAGTCTTATGTAGTTAAAGGACATTTATC[CG]CCTCCTTGGAGAACACAGCCCTCCAGTGTCTCCTGCAGCCTGGAGCCTGGGACATTCTGG	10	35934436	R	GJD4;GJD4	-1.37522	3242555	0.0605556	2.83473	0.00460365	0.00245861	0.521704	2188	3242555	0.0303233	1.41819	0.156214	0.0991678	0.509438	2188	3242555	0.165465	7.80804	6.74797e-15	3.1928e-15	0.555164	2188	3242555	NM_153368	chr10:35927447-35966840	chr10	NC_000010.9	+	35927447	35966840	79	main	NM_153368	GJD4	gap junction protein, delta 4, 40.1kDa
5	cg00194146	TTATTGTAAACCCATTTTACCAGTGATGTGAATGAGCCGCAATGAAGGCTAAGGGACTTG[CG]CAAGGTGACATATATAAGCAACAGGCCTGCGATTGGAATCCAGGCCCCAGAGTCTGGGCA	6	13596383	F	GFOD1	-11.8863	2942363	0.0658561	3.08354	0.00205563	0.00123136	0.522896	2188	2942363	0.0290937	1.36065	0.173704	0.107726	0.508114	2188	2942363	0.0712646	3.33761	0.0008505	0.000163688	0.523142	2188	2942363	NM_018988,AK000337,AL831898	chr6:13444820-13595767	chr6	NC_000006.10	-	13444820	13595767	192	main	NM_018988	GFOD1	glucose-fructose oxidoreductase domain containing 1
7	cg00261781	AAGGTCCCGCGGCCTCGGGCCCCGCCCCGCCCCGGGGCCTCGAGCGCCAGGCCGGCCCGG[CG]AACCCCGCCCAAGGCCAACAAGGAGCCTTGTCCGCGCATTCCAGCGGCAGAAACGGAATG	2	20075998	F	MATN3	13.3994	2542711	0.0159691	0.746696	0.455308	0.124745	0.505874	2188	2542711	0.0239573	1.12033	0.26265	0.146623	0.506098	2188	2542711	-0.00405241	-0.18947	0.849742	0.108117	0.500344	2188	2542711	NM_002381,AK290856	chr2:20055294-20075936	chr2	NC_000002.10	-	20055294	20075936	71	main	NM_002381	MATN3	matrilin 3
8	cg00297600	CCTCAGATGCACAGTGACACCCACCTTGGAGAGTTTCTGTGTCTCTTAAATGACCGAATC[CG]TGTAGAAGGCTTATTACCACAATCTGTAGCTACTTGGTAAACGGCAGCTCTTATTTTGAC	8	35521212	R	UNC5D	1.9087	3093526	0.0964906	4.52547	6.14249e-06	7.89844e-06	0.531853	2188	3093526	0.0707138	3.31173	0.000933075	0.00143175	0.523018	2188	3093526	0.132768	6.24438	4.53435e-10	1.56339e-10	0.544868	2188	3093526	NM_080872,AY358147	chr8:35203402-35773600	chr8	NC_000008.9	+	35203402	35773600	400	main	NM_080872	UNC5D	unc-5 homolog D (C. elegans)
9	cg00335286	GCCAAACCAGTGGCTGTTTCTGAAATGTGAGCTTCCGCCCCAAGCTAAAAAGTGTTCACA[CG]TGGGTGGTCTGGAAAAGACCAAAGAGAGAGACCTGAGTTGAATTTGCCAGGCGGGTAAAC	18	13906355	R	MC2R	1.85544	3800116	0.0128704	0.601787	0.547367	0.145429	0.503543	2188	3800116	-0.00873593	-0.408456	0.682975	0.293426	0.495899	2188	3800116	-0.00390482	-0.18257	0.855152	0.108718	0.501058	2188	3800116	NM_000529,BC094710	chr18:13871922-13875546	chr18	NC_000018.8	-	13871922	13875546	16	main	NM_000529	MC2R	melanocortin 2 receptor (adrenocorticotropic hormone)
381	cg20066677	AAGAAGCCCTCACCGAGAGCTGTGGGAACAAGAGCTGCCGGGAACAAGAGCTGCGGGAAG[CG]GCTCCTACGAATTGGTGGCAGGAGGCACAAAAACGAAATACCTATTTTTGGAATACGGAA	12	131934493	F	CHFR;CHFR;CHFR;CHFR;CHFR	13.327	3479438	0.0921857	4.32239	1.56866e-05	1.79151e-05	0.531619	2188	3479438	-0.00250305	-0.11703	0.906847	0.352864	0.498743	2188	3479438	0.0977754	4.58611	4.60734e-06	1.10214e-06	0.533683	2188	3479438	NM_018223,AF170724	chr12:131924640-131995825	chr12	NC_000012.10	-	131924640	131995825	266	main	NM_018223	CHFR	checkpoint with forkhead and ring finger domains
11	cg00350702	GAAGCAGTTCGATGCCTACCCCAAGACTTTGGAGGACTTCCGGGTCAAGACCTGCGGGGG[CG]CCACCGGTAGGCCGCAGCGGGGCCGGGGTCGCGTGGAGGGGGGCGTCCTAGAGCTTAGCC	20	33593341	R	ERGIC3;ERGIC3	2.07202	3883382	-0.0727104	-3.40556	0.000664874	0.000465217	0.475838	2188	3883382	-0.0775229	-3.63185	0.000283853	0.000503569	0.47614	2188	3883382	-0.234363	-11.1651	1.10398e-28	9.90488e-29	0.421517	2188	3883382	NM_198398,NM_015966,EF206690	chr20:33593210-33608819	chr20	NC_000020.9	+	33593210	33608819	166	main	NM_198398	ERGIC3	ERGIC and golgi 3
12	cg00410898	CTTGCACCTCTGGCTTTTGCAAACTGGGGGCCCAAGAGCTGCACCCAGGGATTTTATAGC[CG]TTCTTATCGGTCCTCAGGATCAAGGACCAATCAGGTCCCTCAACTGGTCTGGTGAGCCAA	8	23768300	R	STC1	-4.30305	3128046	0.0204391	0.955757	0.339267	0.0977705	0.507129	2188	3128046	0.01344	0.628419	0.529783	0.246208	0.506056	2188	3128046	0.0935953	4.38886	1.15909e-05	2.67931e-06	0.530353	2188	3128046	NM_003155,U25997	chr8:23719388-23773855	chr8	NC_000008.9	-	23719388	23773855	124	main	NM_003155	STC1	stanniocalcin 1
13	cg00412772	TTGGGTGGGGCGTCTCAGCATTCCTCCAACGGGCAGGTCTCAGCGCTCCTCCCCCTGCTC[CG]CTCCTCTGCAGGGCCCAGGCGCCCTTGGCCTTAGGACCCAACTTCTCTTACCGCCATGGA	19	43486685	F	YIF1B;YIF1B;C19orf33;YIF1B;YIF1B;YIF1B;YIF1B;YIF1B;C19orf33	1.84412	3832280	-0.0198019	-0.925954	0.354541	0.101337	0.492994	2188	3832280	0.0185557	0.867666	0.385645	0.195229	0.50337	2188	3832280	0.0944047	4.42704	9.72329e-06	2.26166e-06	0.531814	2188	3832280	NM_033520,BC060319	chr19:43486644-43487482	chr19	NC_000019.8	+	43486644	43487482	34	main	NM_033520	C19orf33	chromosome 19 open reading frame 33
13	cg00412772	TTGGGTGGGGCGTCTCAGCATTCCTCCAACGGGCAGGTCTCAGCGCTCCTCCCCCTGCTC[CG]CTCCTCTGCAGGGCCCAGGCGCCCTTGGCCTTAGGACCCAACTTCTCTTACCGCCATGGA	19	43486685	F	YIF1B;YIF1B;C19orf33;YIF1B;YIF1B;YIF1B;YIF1B;YIF1B;C19orf33	1.84412	3861302	0.0672011	3.14671	0.00165994	0.00102124	0.522771	2188	3861302	0.0171185	0.80045	0.423514	0.208986	0.503495	2188	3861302	0.0822343	3.85354	0.000117675	2.46631e-05	0.528623	2188	3861302	NM_001039673,NM_001039672,NM_033557,NM_001039671,BC091477	chr19:43482328-43499733	chr19	NC_000019.8	-	43482328	43499733	88	main	NM_001039673	YIF1B	Yip1 interacting factor homolog B (S. cerevisiae)
14	cg00412805	TTTCTCTGGGAGGGGGCCTCTGCCCAGCTGTCCCCTGTGCGTCATGTGCAGGAGGCCAGG[CG]GCTCGCCTTACAGGGACCCGGCCACCTCTATATATAGCCCCTCGAAGACAGCTGCTCAGT	3	42701974	F	KBTBD5	4.01681	2619446	0.0687962	3.22163	0.00128195	0.000818069	0.52255	2188	2619446	0.0328002	1.53411	0.125079	0.0836723	0.510556	2188	2619446	0.130296	6.12677	9.51489e-10	3.19036e-10	0.543272	2188	2619446	NM_152393,AY176040	chr3:42702025-42708942	chr3	NC_000003.10	+	42702025	42708942	46	main	NM_152393	KBTBD5	kelch repeat and BTB (POZ) domain containing 5
15	cg00462994	CAGAGGAGACTCCTGGTCCCCTGTCCGGACCCCGCCCCGACCAGGTCCAGCCCCGCCCAA[CG]GCAAGTTAAGAGCCCCCCAGTGCCAGACGCTCCAGACAGACTGCCACTCTTGGGGGGCAA	17	39437481	F	NAGS;PYY	13.5874	3722700	0.0635014	2.97299	0.00296207	0.00168228	0.520159	2188	3722700	0.0071232	0.333049	0.739127	0.308926	0.502064	2188	3722700	0.102931	4.82962	1.40155e-06	3.5267e-07	0.533449	2188	3722700	NM_153006,AY116538	chr17:39417133-39441954	chr17	NC_000017.9	+	39417133	39441954	89	main	NM_153006	NAGS	N-acetylglutamate synthase
15	cg00462994	CAGAGGAGACTCCTGGTCCCCTGTCCGGACCCCGCCCCGACCAGGTCCAGCCCCGCCCAA[CG]GCAAGTTAAGAGCCCCCCAGTGCCAGACGCTCCAGACAGACTGCCACTCTTGGGGGGCAA	17	39437481	F	NAGS;PYY	13.5874	3758775	0.0394959	1.84758	0.0647285	0.0239041	0.5134	2188	3758775	0.0187305	0.87584	0.381186	0.193526	0.504962	2188	3758775	0.0774685	3.62929	0.000286675	5.79016e-05	0.526586	2188	3758775	NM_004160,BC041057	chr17:39385632-39437353	chr17	NC_000017.9	-	39385632	39437353	41	main	NM_004160	PYY	peptide YY
16	cg00503840	CTGGAGGCATCTTCGGACCTCTGGGCGGCCCAGCCCTGCCTGGCGTCTCCCCGCCGCTTG[CG]GCCTACCGCCAAGAAGCTATGCCTTAGGCAAACCATGGAGCTCTGGCCCCAGAGGGCGCC	7	96488445	F	DLX5	0.00267963	3062523	0.0481539	2.25316	0.0242927	0.0102822	0.515575	2188	3062523	0.0401857	1.87988	0.0601881	0.0470843	0.514303	2188	3062523	0.0821933	3.85161	0.000118603	2.48508e-05	0.52756	2188	3062523	NM_005221,BC006226	chr7:96480831-96492238	chr7	NC_000007.12	-	96480831	96492238	39	main	NM_005221	DLX5	distal-less homeobox 5
17	cg00515905	GGTGCCAGTGAAGGCCGGGTGCCTGGTCCCCCCAGGAGGCTGGTCTTGGAGCAGGTGGTC[CG]GTGCTGGTGGTGGAAGGACAGCAGCTTCTCTGCTAGTGGCCACAGGCAGAGCCTGCCTTT	1	110108030	R	EPS8L3;EPS8L3;EPS8L3;EPS8L3;EPS8L3;EPS8L3	-4.10327	2427231	0.0837539	3.92508	8.76959e-05	8.02062e-05	0.527292	2188	2427231	0.0422924	1.97855	0.0479257	0.0390956	0.514823	2188	2427231	0.130364	6.13001	9.32477e-10	3.13132e-10	0.544255	2188	2427231	NM_139053,NM_133181,NM_024526,AK292198	chr1:110094226-110112507	chr1	NC_000001.9	-	110094226	110112507	139	main	NM_139053	EPS8L3	EPS8-like 3
18	cg00582628	AAAACATGCCCCAGCTTTCCCAAGATAACCAAGAGTGCCTCCAGAAACATTTCTCCAGGC[CG]TCTATATGGACACAGTTTCTGCCCCTGTTCAGGGCTCAGAGATATAATACAGACATTCAC	8	54927068	R	RGS20	-1.67816	3098378	0.0691692	3.23916	0.00120585	0.000776114	0.522634	2188	3098378	0.0221475	1.03567	0.300431	0.162287	0.505625	2188	3098378	0.0551887	2.58295	0.00982293	0.00168417	0.51687	2188	3098378	NM_170587,NM_003702,AY046538	chr8:54926921-55034410	chr8	NC_000008.9	+	54926921	55034410	174	main	NM_170587	RGS20	regulator of G-protein signaling 20
19	cg00687674	CTACAACTATGGCTTGTCTGAGTCCTGAGCCAGCAGAGCTCAGGCCACAGCACCTGCACC[CG]TTTTCTGCTGCTGCACACAAGGGCTCTGTGCATTCCGCATCCAGGTGTGCCCCTCCTCTT	15	67160314	F	MIR548H4;TMEM84	3.75767	3599669	0.0100577	0.470261	0.63821	0.164737	0.501581	2188	3599669	0.0393455	1.84054	0.0657549	0.0505436	0.513087	2188	3599669	0.0679379	3.18131	0.00147415	0.000276766	0.521726	2188	3599669	AK292174,BC101594,AK091087,AK097560	chr15:67152330-67179321	chr15	NC_000015.8	+	67152330	67179321	89	main	AK292174	TMEM84	transmembrane protein 84
20	cg00744433	TTCTCCAAGTAATTTTCATGTGCAGCCAGAATTGCAACTCACCAGGCTAAACTGCAGTTG[CG]CAATTCTGGTCTTCTTGATACCTGATTTCTTTGCCCCTTCTCTTTTCTGGTTCAATGCAT	21	17805938	R	CXADR	-1.4114	3915479	0.00112661	0.0526745	0.957996	0.227332	0.499822	2188	3915479	0.00853102	0.398875	0.690021	0.295525	0.500527	2188	3915479	-0.0177628	-0.830583	0.406275	0.055413	0.493843	2188	3915479	NM_001338,NR_024387,BC010536,AL049332	chr21:17807042-17889622	chr21	NC_000021.7	+	17807042	17889622	125	main	NM_001338	CXADR	coxsackie virus and adenovirus receptor
21	cg00845900	AATCCCCCTACCTTGATGTCTTCTCTTAGTAATCCCACTGATCCTCTCTGTTTTCTTTGC[CG]TATTCAGTGTTAAGCACAGTAAGTCTTTCCTACTGAAATAGCCATGGTCCTAATCATAAT	7	129718965	R	CPA4;CPA4	-8.58936	3023883	0.000576088	0.0269348	0.978514	0.230919	0.500557	2188	3023883	0.0382045	1.78711	0.0739878	0.0554806	0.512663	2188	3023883	0.0580536	2.71733	0.00660241	0.00115708	0.518706	2188	3023883	NM_016352,BC052289	chr7:129720229-129751250	chr7	NC_000007.12	+	129720229	129751250	101	main	NM_016352	CPA4	carboxypeptidase A4
23	cg00943950	GCCCGGATGCGTCCCTCTTTCTCCACCCCGCCGAGCCTAAACTAGTGACGGGGAGGGAGA[CG]GGATAGTGTTTCTGTTTCGTGGTCTTTGAATCCACAACCTCTAGTCTGAACACAGAGAAC	5	133734820	F	UBE2B;UBE2B	33.477	2829275	-0.0358742	-1.67801	0.0934185	0.032671	0.488257	2188	2829275	0.00237792	0.111179	0.911485	0.353901	0.499032	2188	2829275	0.11529	5.41444	6.38087e-08	1.82136e-08	0.538621	2188	2829275	NM_003337,M74525	chr5:133734769-133788148	chr5	NC_000005.8	+	133734769	133788148	153	main	NM_003337	UBE2B	ubiquitin-conjugating enzyme E2B (RAD6 homolog)
24	cg00955230	CCCACTTTTCCAGATTGCTCTGAATGTCCTAGTGAGCTGCTCCCGTTGGGTAGGCTCCTG[CG]CCTCAACCGCGCTCGGTACTCGACGTTTATTATCAGGGAATTCTCGGCTGCAAGATGGGA	7	73307141	R	RFC2;RFC2	3.41792	3056414	0.00182727	0.0854335	0.931925	0.222495	0.500132	2188	3056414	0.0374843	1.75339	0.0796053	0.058741	0.513166	2188	3056414	0.114325	5.36871	8.22052e-08	2.32534e-08	0.538096	2188	3056414	NM_181471,NM_002914,M87338	chr7:73283768-73306674	chr7	NC_000007.12	-	73283768	73306674	83	main	NM_181471	RFC2	replication factor C (activator 1) 2, 40kDa
25	cg01056568	AGAAGGAACTCTGAAGACTCCGTAGATTGCTCTAGACCGCCTCAGACACTCTCGGCGCAG[CG]TGGAGAGGATTTGTGCAAACATTTCCTCTGTGGACCAAGAGGAATGCAAGAGGAGGCTGC	17	9669983	F	GLP2R	-0.326099	3710108	0.00936417	0.437832	0.661547	0.169578	0.503105	2188	3710108	0.0489969	2.29267	0.0219087	0.0207659	0.515413	2188	3710108	0.0570297	2.6693	0.00762428	0.00132534	0.519074	2188	3710108	NM_004246,BC096262	chr17:9670012-9789064	chr17	NC_000017.9	+	9670012	9789064	139	main	NM_004246	GLP2R	glucagon-like peptide 2 receptor
26	cg01114088	TCGCGGGTGATCTCCTGGCTCAGGGCCCGCATGCGGGAGTAGCAGGTCGGGGGAGTGGGC[CG]CGCGGCGGGGGCTCCCGCCAGGAGCAGCAGCAGCACGGGCAGAGGCCCAGGCGTCCTCAT	4	5072012	R	CYTL1	-0.226611	2758870	0.02573	1.20326	0.228954	0.0699373	0.509572	2188	2758870	0.0819832	3.84172	0.000123475	0.000241242	0.528489	2188	2758870	0.135776	6.3876	1.80622e-10	6.40688e-11	0.546456	2188	2758870	NM_018659,AF193766	chr4:5064624-5072100	chr4	NC_000004.10	-	5064624	5072100	36	main	NM_018659	CYTL1	cytokine-like 1
27	cg01128603	TTGCCAGCTTAGTTGTAATTTCTTGTATCCATCTTGGTCCTCTTCAGTGCCCAGCCAGAG[CG]CTGGCAGACAGGCACTGGGTACGTTTTGTTGAATGAATTGGGAGCGAACGTCGTTTAGTG	11	65576967	R	SF3B2	-0.499181	3335907	0.00229954	0.107515	0.914391	0.219188	0.500994	2188	3335907	-0.0575836	-2.69528	0.00705515	0.00811005	0.48261	2188	3335907	-0.134908	-6.34627	2.36043e-10	8.31193e-11	0.45427	2188	3335907	NM_006842,U41371	chr11:65573499-65593343	chr11	NC_000011.8	+	65573499	65593343	165	main	NM_006842	SF3B2	splicing factor 3b, subunit 2, 145kDa
28	cg01131735	CTCCGTCGGCCCGGGCTCCTGCCTTGGGGGTGTCCCCTAGGTAGAGAATGCGTCGGGGAG[CG]CTTCCCGCCAGAGATGGGAAGCCCAGGAAGCCCCTCCCCATGCAAACAGTGCCCCCGCCT	17	37221945	R	FKBP10;SC65;SC65	-22.9147	3721452	0.0638261	2.98823	0.00281847	0.00161141	0.522114	2188	3721452	0.046208	2.16198	0.0306685	0.0272181	0.514877	2188	3721452	0.165046	7.78793	7.9016e-15	3.726e-15	0.555762	2188	3721452	NM_021939,AK092042	chr17:37222498-37232949	chr17	NC_000017.9	+	37222498	37232949	122	main	NM_021939	FKBP10	FK506 binding protein 10, 65 kDa
28	cg01131735	CTCCGTCGGCCCGGGCTCCTGCCTTGGGGGTGTCCCCTAGGTAGAGAATGCGTCGGGGAG[CG]CTTCCCGCCAGAGATGGGAAGCCCAGGAAGCCCCTCCCCATGCAAACAGTGCCCCCGCCT	17	37221945	R	FKBP10;SC65;SC65	-22.9147	3757376	0.0395721	1.85115	0.0642137	0.0237502	0.51248	2188	3757376	0.000238501	0.011151	0.991104	0.373073	0.500924	2188	3757376	0.0781977	3.66359	0.000250943	5.09454e-05	0.527028	2188	3757376	NM_006455,U47621	chr17:37211736-37222538	chr17	NC_000017.9	-	37211736	37222538	85	main	NM_006455	SC65	synaptonemal complex protein SC65
29	cg01137065	CGTGTATATTTTTAAACTGTGTGCTGACGACAGTTAAGTAAATGTGATTCAGAACTTCTG[CG]TATTTTGCAGGACAGTTTTGACACAATGACATGACTCGCTAGCCAGGAAAGATAACGACA	17	78070299	F	FOXK2	14.3738	3738969	0.0746714	3.49775	0.000472789	0.000348189	0.524819	2188	3738969	-0.0125787	-0.588146	0.556485	0.254362	0.49354	2188	3738969	0.0146828	0.686541	0.492429	0.0660967	0.505329	2188	3738969	NM_004514,U58197	chr17:78070883-78195807	chr17	NC_000017.9	+	78070883	78195807	324	main	NM_004514	FOXK2	forkhead box K2
30	cg01211097	TTCTTAATAATGAATGAACCAACGACCCCCAAGGCTGGTTTGCCCGTGCACACGCACGCA[CG]TGTGCAACACGTAGCACTTGCTGAGTGTTTGCTACTTGCCAGGCCTCATGTCAAGCACTT	16	83290470	F	USP10	-10.2752	3671873	-0.118912	-5.58613	2.42093e-08	5.4511e-08	0.459193	2188	3671873	-0.137685	-6.47854	9.96473e-11	7.45547e-10	0.456653	2188	3671873	-0.264729	-12.6793	2.07422e-36	2.50618e-36	0.409693	2188	3671873	NM_005153,BC000263	chr16:83291080-83371023	chr16	NC_000016.8	+	83291080	83371023	183	main	NM_005153	USP10	ubiquitin specific peptidase 10
31	cg01221637	GGCCAGGAGAGGGAGACTTGGCCCAAATAAAGTGACTCAGGCACCCTCAGGAACTCTCGG[CG]CCCGGGGCCCCTTCGGGCAGCCTTCGACCCCCATGCGTCTTTCGGGTCCCCAGGGACGCG	20	30535605	R	C20orf112	-8.83856	3902743	-0.100839	-4.73079	2.28737e-06	3.28326e-06	0.465779	2188	3902743	-0.0864203	-4.05066	5.17307e-05	0.000111382	0.472133	2188	3902743	-0.125655	-5.9062	3.68605e-09	1.17433e-09	0.459767	2188	3902743	NM_080616	chr20:30427559-30495591	chr20	NC_000020.9	-	30427559	30495591	48	main	NM_080616	C20orf112	chromosome 20 open reading frame 112
31	cg01221637	GGCCAGGAGAGGGAGACTTGGCCCAAATAAAGTGACTCAGGCACCCTCAGGAACTCTCGG[CG]CCCGGGGCCCCTTCGGGCAGCCTTCGACCCCCATGCGTCTTTCGGGTCCCCAGGGACGCG	20	30535605	R	C20orf112	-8.83856	3902764	0.0582186	2.72507	0.0064498	0.00328284	0.521613	2188	3902764	-0.0676456	-3.16759	0.00154544	0.00222211	0.47751	2188	3902764	-0.0404592	-1.89269	0.0584622	0.00909887	0.487848	2188	3902764	NM_080616,AK097804	chr20:30498759-30636537	chr20	NC_000020.9	-	30498759	30636537	334	main	NM_080616	C20orf112	chromosome 20 open reading frame 112
32	cg01252496	CACTTTTCCTCCCCAGTACGTGGGAGCCCTAGAGGACATGTTGCAGGCCCTGAAGGTCCA[CG]CGAGGTGAGTGCAGGCAGCCTCAGGGCTTTCACATCAGCACGTGGCTGTGCTACTGGACA	19	17187655	R	USE1	2.34896	3824103	-0.0970734	-4.55297	5.39368e-06	7.03033e-06	0.465984	2188	3824103	-0.0707738	-3.31455	0.000923731	0.00142122	0.478601	2188	3824103	-0.172674	-8.15503	4.16843e-16	2.10968e-16	0.442354	2188	3824103	NM_018467,AB097050	chr19:17187236-17192035	chr19	NC_000019.8	+	17187236	17192035	55	main	NM_018467	USE1	unconventional SNARE in the ER 1 homolog (S. cerevisiae)
34	cg01261503	CAGTTTTAGTCCTTTACGGTGATTTGTAAGCCCAGGCCTTCTTAACTAGGCAAATGCTGC[CG]CCAGGTGGCCTAGGCCTAACCCCAGAGCCGTTGTCTTGACGCTTAAGCTTCCGGGGAGGG	17	59924061	R	POLG2	1.04747	3766861	-0.125993	-5.92221	3.34616e-09	9.0084e-09	0.456981	2188	3766861	-0.0989589	-4.64199	3.5239e-06	1.00168e-05	0.468574	2188	3766861	-0.265971	-12.7417	9.51316e-37	1.16393e-36	0.409372	2188	3766861	NM_007215,AF142992	chr17:59904129-59923631	chr17	NC_000017.9	-	59904129	59923631	122	main	NM_007215	POLG2	polymerase (DNA directed), gamma 2, accessory subunit
35	cg01335367	ACGGGCAGGAATCTGTTGTAGAAGAGTTGCTGCCGGGACCTGCTGGTGAATTGGCTCCAC[CG]GATCCGGCTCCGCAGAAAGCTCACTGCTTCCTGTGGCTCCTGGATTTCCAAGCCTCTGGG	12	108656591	R	MGC14436;MGC14436;C12orf34	1.21111	3431247	0.0908498	4.2594	2.08142e-05	2.29589e-05	0.531074	2188	3431247	0.0440829	2.06242	0.0392222	0.0332486	0.514422	2188	3431247	0.144096	6.7844	1.27208e-11	4.90286e-12	0.546983	2188	3431247	NM_032829,BC020193	chr12:108544228-108692685	chr12	NC_000012.10	+	108544228	108692685	184	main	NM_032829	C12orf34	chromosome 12 open reading frame 34
36	cg01400401	AAGAAGCTAGGAGGGGAAATAAATTGAGTGGGGGTGGGGTTTCCCAAGAATCGGAGGAAC[CG]AGAACGAAGAGGGGTGGGGGAACGGGGAAAGAGAGAGGAAAATCAAGTTTTCTTCAGCAC	19	4720531	R	MIR7-3;C19orf30	4.00959	3817651	0.052976	2.4792	0.0131997	0.00607726	0.517387	2188	3817651	0.00684725	0.320146	0.748887	0.311661	0.501365	2188	3817651	0.0429752	2.01053	0.044432	0.00702805	0.513203	2188	3817651		chr19:4710907-4723529	chr19	NC_000019.8	+	4710907	4723529	66	main	ENST00000381790	C19orf30	chromosome 19 open reading frame 30
37	cg01441777	TATGACACACCTATATTCACACAGTTGTGACTGTGGACACGCAAAATGCCTGAGGCCCTG[CG]TCCAATCCCGGAAGCACAGTTCCTGGGAGGAGTCACTTCTATAATAGCCGTATCTTCCCT	22	37044362	R	CSNK1E;CSNK1E	-8.74169	3960478	0.0300953	1.40752	0.159352	0.0515225	0.510915	2188	3960478	-0.106007	-4.97503	6.70291e-07	2.23471e-06	0.468794	2188	3960478	-0.153355	-7.22707	5.51636e-13	2.31842e-13	0.447362	2188	3960478	NM_001894,NM_152221,BC006490,NR_002821	chr22:37010115-37150916	chr22	NC_000022.9	-	37010115	37150916	469	main	NM_001894	CSNK1E	casein kinase 1, epsilon
38	cg01450842	GGTGGTGGACTTTGGGACTGGACAGACCTGGTCACAGTCTAGGTTCTACATCTTACTGGT[CG]AGCAACTTTAGGCAAGTAGCTTAACTCCTCCGAACTTATTTTCCTTTTCTACCAAATAAT	2	48649717	R	STON1-GTF2A1L;STON1-GTF2A1L	-11.6543	2481379	-0.027088	-1.2668	0.205305	0.063902	0.489005	2188	2481379	-0.00733331	-0.342873	0.731725	0.306898	0.495374	2188	2481379	0.0483616	2.2629	0.0236854	0.00388017	0.517006	2188	2481379	NM_172311,NM_006872,NM_172196,NM_006873,AF026169,BC025991,BC121063,AK128867	chr2:48610036-48813791	chr2	NC_000002.10	+	48610036	48813791	247	main	NM_172311	STON1-GTF2A1L	STON1-GTF2A1L readthrough transcript
39	cg01459453	GCAAGTTTAAAAGTACTCACAAAATCTAATAGGCAATTCAACATAAAACTCCATGGCTAT[CG]CTGTTCCTCACTTTCTGAACCTTTACCTGCCTGACTTTACTCCATACCACTCCAACTCAC	1	167865836	R	SELP	-0.294799	2443417	-0.0215575	-1.00807	0.313496	0.0913028	0.490024	2188	2443417	0.0225962	1.05666	0.290743	0.158509	0.505559	2188	2443417	0.0761767	3.56853	0.000361926	7.23991e-05	0.524639	2188	2443417	NM_003005,BC068533	chr1:167824453-167866048	chr1	NC_000001.9	-	167824453	167866048	122	main	NM_003005	SELP	selectin P (granule membrane protein 140kDa, antigen CD62)
40	cg01511567	GTAGTTTTATTGTATCAGACTTAGTACAGGGGTGGGGTGGGGGTGTGTATTGGAATGATG[CG]TGCCCGTTTCTCTGCAAAATAGTTTCTATGTCATGGAAAGGAGTCGATGGGACAAGAAGA	11	56860207	F	SSRP1	-0.95566	3373724	-0.10513	-4.93353	8.29072e-07	1.31706e-06	0.463393	2188	3373724	-0.0985995	-4.62502	3.82402e-06	1.08013e-05	0.470656	2188	3373724	-0.34594	-16.8702	1.53775e-62	4.98524e-62	0.382899	2188	3373724	NM_003146,AB209132	chr11:56845327-56860018	chr11	NC_000011.8	-	56845327	56860018	176	main	NM_003146	SSRP1	structure specific recognition protein 1
41	cg01519742	CAGCCCCGCGCCGCATCCTCCGGCCGCCCCCTCCCCGCTGCGAGCTTACGCCGCTGTCGC[CG]CCGCCACCGCCTTAAAAAGGACAAAACGGAACAGAAAATGAATGCATGCACAAAAAAAAT	4	6252992	F	JAKMIP1;JAKMIP1;JAKMIP1;JAKMIP1	7.24759	2759158	0.133705	6.28899	3.4114e-10	1.13725e-09	0.545895	2188	2759158	-0.0121719	-0.569119	0.569324	0.258498	0.495021	2188	2759158	-0.141286	-6.65027	3.17209e-11	1.1893e-11	0.456767	2188	2759158	NM_144720,NM_001099433,AK124718	chr4:6106383-6253183	chr4	NC_000004.10	-	6106383	6253183	115	main	NM_144720	JAKMIP1	janus kinase and microtubule interacting protein 1
42	cg01623187	ATGATAGGTGTGAGCCCCTGCGCTTTGCCAGGGCTGGTTTTTGGATGTGATTCTCAGGGC[CG]TCTTTCTTTACCCTTCTGCTCTGCTGAGGCCCACAGCAGCCTAGTCTCCTTGGGTGTGGG	20	41789553	R	GTSF1L;GTSF1L	-3.80628	3906709	-0.0264471	-1.23681	0.216236	0.066749	0.490473	2188	3906709	-0.0474728	-2.22125	0.0263798	0.0240676	0.48695	2188	3906709	-0.0494553	-2.31416	0.0206996	0.00341613	0.479748	2188	3906709	NM_176791,NM_001008901,BC040049	chr20:41788218-41789038	chr20	NC_000020.9	-	41788218	41789038	24	main	NM_176791	GTSF1L	gametocyte specific factor 1-like
43	cg01626227	TGCTGGGTATCCGCGCCGGAACCGCGAGGGGGTTGGTTCAGGCCTAGGCGCGGGGCAGGA[CG]GGACCGGTGAGTGGCTCCTCCAAACAGCTATAGAGACCCAGAAATGCCTGTGGAAAGCTA	7	99355225	F	TRIM4;TRIM4	-5.64066	3063536	-0.0817106	-3.82889	0.000130075	0.00011296	0.471479	2188	3063536	-0.100895	-4.73342	2.25802e-06	6.69054e-06	0.468222	2188	3063536	-0.256603	-12.2716	3.07577e-34	3.43358e-34	0.4141	2188	3063536	NM_033017,NM_033091,AF220023	chr7:99307682-99368888	chr7	NC_000007.12	-	99307682	99368888	132	main	NM_033017	TRIM4	tripartite motif-containing 4
44	cg01651821	CAGAACCTGCAGGAGCAGATCAATCCCCTCTTGGTAACACACCAGAGCCTGCGGATACCG[CG]ACTCCGAATCTAGTTCTACTGCCCGCTTTAGCACAGTGGCTGCAGCTGTGCTCTGCGGGT	2	99163790	F	MRPL30;MITD1	12.4345	2495806	-0.0853212	-3.99889	6.44223e-05	6.13257e-05	0.469983	2188	2495806	-0.0215404	-1.00727	0.313878	0.167756	0.491219	2188	2495806	-0.139264	-6.55381	6.05471e-11	2.22335e-11	0.453895	2188	2495806	NM_145212,NM_145213,BC022391	chr2:99164010-99181886	chr2	NC_000002.10	+	99164010	99181886	79	main	NM_145212	MRPL30	mitochondrial ribosomal protein L30
44	cg01651821	CAGAACCTGCAGGAGCAGATCAATCCCCTCTTGGTAACACACCAGAGCCTGCGGATACCG[CG]ACTCCGAATCTAGTTCTACTGCCCGCTTTAGCACAGTGGCTGCAGCTGTGCTCTGCGGGT	2	99163790	F	MRPL30;MITD1	12.4345	2566645	-0.0984849	-4.6196	3.9248e-06	5.29838e-06	0.466665	2188	2566645	-0.028054	-1.312	0.189599	0.114831	0.49046	2188	2566645	-0.125045	-5.87722	4.38864e-09	1.38943e-09	0.45873	2188	2566645	NM_138798,BC018453	chr2:99144342-99163991	chr2	NC_000002.10	-	99144342	99163991	102	main	NM_138798	MITD1	MIT, microtubule interacting and transport, domain containing 1
45	cg01918706	CTTCTAGTGGCAAATTTCTCCCTGCTGTGGCAGGAGGACGGCTCGGGGGAGCTCTGACCA[CG]ATTTCATGCAAAGATACGGTGAGACCCTCCGCTCAACAGTGGCTTTTCTAAGGCTCTCCT	1	200577464	F	UBE2T	0.48113	2451200	-0.0438903	-2.0534	0.0400889	0.0158061	0.485942	2188	2451200	-0.0709908	-3.32474	0.000890666	0.00137793	0.478765	2188	2451200	-0.204126	-9.67979	5.18888e-22	3.48913e-22	0.433437	2188	2451200	NM_014176,AF160215	chr1:200567420-200577835	chr1	NC_000001.9	-	200567420	200577835	81	main	NM_014176	UBE2T	ubiquitin-conjugating enzyme E2T (putative)
46	cg01930621	ACATGGGCTTCTCTTCGAGGAGGTAACATGTCCGCGCCCTGAGCCACGGCTCTCTGGGCG[CG]GCCATCTTGGTAGATCTGCCGTACAGAAGGGAAACAGTTGTTCTTGTGTCATTAAACCGG	19	57100162	F	ZNF649	-21.7879	3869312	-0.126909	-5.96574	2.56914e-09	7.07073e-09	0.456718	2188	3869312	-0.103836	-4.87238	1.13062e-06	3.58425e-06	0.467373	2188	3869312	-0.25961	-12.4223	4.93591e-35	5.68951e-35	0.411506	2188	3869312	NM_023074,BC005368	chr19:57084300-57100168	chr19	NC_000019.8	-	57084300	57100168	44	main	NM_023074	ZNF649	zinc finger protein 649
47	cg01946401	GCTTTTTTGGATTGTGTGAATGCTTCATTCGCCTCACAAACAACCACAGAACCACAAGTG[CG]GTGCAAACTTTCTCCAGGAGGACAGCAAGAAGTCTCTGGTTTTTAAATGGTTAATCTCCG	6	45404079	F	SUPT3H;SUPT3H;RUNX2;RUNX2;RUNX2;RUNX2	-1.55239	2908762	0.0309726	1.44858	0.147534	0.0482854	0.509628	2188	2908762	-0.0467915	-2.18932	0.0286207	0.0257365	0.483738	2188	2908762	0.0914996	4.29004	1.81477e-05	4.12484e-06	0.53437	2188	2908762	NM_001024630,NM_001015051,NM_004348,BC108919	chr6:45404038-45740060	chr6	NC_000006.10	+	45404038	45740060	267	main	NM_001024630	RUNX2	runt-related transcription factor 2
47	cg01946401	GCTTTTTTGGATTGTGTGAATGCTTCATTCGCCTCACAAACAACCACAGAACCACAAGTG[CG]GTGCAAACTTTCTCCAGGAGGACAGCAAGAAGTCTCTGGTTTTTAAATGGTTAATCTCCG	6	45404079	F	SUPT3H;SUPT3H;RUNX2;RUNX2;RUNX2;RUNX2	-1.55239	2955282	-0.166312	-7.84877	4.89582e-15	4.41896e-14	0.443836	2188	2955282	-0.168058	-7.93274	2.51398e-15	4.4052e-14	0.445022	2188	2955282	-0.320114	-15.512	2.54732e-53	5.8273e-53	0.392569	2188	2955282	NM_181356,NM_003599,BC050384	chr6:44884792-45453675	chr6	NC_000006.10	-	44884792	45453675	394	main	NM_181356	SUPT3H	suppressor of Ty 3 homolog (S. cerevisiae)
48	cg02016419	AGAGGCCTCGGTGATTTCCCGACCTCTCCTGTGAAGCCTGATTCGGAACTCTTCCAGCTG[CG]AAGAACTTGGCCGATTCTAAGGCACATCAGGGCTGCCTGGAACCCTAACACCTGCCTAGG	17	15185962	F	TEKT3	7.24698	3746625	0.0127141	0.594475	0.552245	0.146503	0.505288	2188	3746625	0.0158673	0.741933	0.458189	0.221415	0.505885	2188	3746625	0.0253738	1.1866	0.235465	0.0334595	0.507666	2188	3746625	NM_031898,AK057390	chr17:15147858-15241740	chr17	NC_000017.9	-	15147858	15241740	120	main	NM_031898	TEKT3	tektin 3
49	cg02071305	TGCCTGATGGATAATCCATCACTTGCTTTTCTAGTATGAATGGTCTATTTACGGGTCCAG[CG]CCCCTGCTGGCTTACGACCTTTTCCAGGGCGGGGAGGGGCTGTCCTCATCTCTGTGACCC	15	38973265	R	VPS18	-3.88641	3590204	0.127384	5.98833	2.23842e-09	6.2632e-09	0.54291	2188	3590204	0.0144646	0.676335	0.498885	0.235551	0.505097	2188	3590204	0.120323	5.65303	1.64683e-08	4.95433e-09	0.540828	2188	3590204	NM_020857,AF308802	chr15:38973920-38983614	chr15	NC_000015.8	+	38973920	38983614	68	main	NM_020857	VPS18	vacuolar protein sorting 18 homolog (S. cerevisiae)
50	cg02151301	ACTGCGCCCAGCCCATTTTACAGACTTTTATTTTGTTCAGTTTCTTTATTGTCTTCCCAA[CG]TCCCCCCACACACACTGCACTAAAATGCAAACTTCACGAAGGCAAGGAGGAACTTTTGCC	20	29565446	R	HM13;HM13;HM13;HM13	-6.96255	3881282	0.104152	4.88733	1.04837e-06	1.62066e-06	0.5364	2188	3881282	0.0322694	1.50927	0.131308	0.0866334	0.510695	2188	3881282	0.12037	5.65527	1.62554e-08	4.89227e-09	0.540952	2188	3881282	NM_178580,NM_178581,NM_030789,NM_178582,NR_003677,DQ168450	chr20:29548493-29623431	chr20	NC_000020.9	+	29548493	29623431	294	main	NM_178580	HM13	histocompatibility (minor) 13
51	cg02154074	TGGGGAACGCGAGTGGGGACAGGGGGGCCTTCAGCTGGGCCCCAGGGAACCGCCCCGTGG[CG]CTCTCGGCCTCGCTCTCACTCACGGTGCTACAGGTGGTAAGCAAATTGACTATGTTGTGG	2	74609742	F	HTRA2;HTRA2;AUP1	6.19904	2489411	0.0457723	2.14157	0.0322783	0.0131248	0.517294	2188	2489411	0.00463327	0.216629	0.828517	0.333076	0.501528	2188	2489411	0.0654126	3.06272	0.00220398	0.00040704	0.520322	2188	2489411	NM_013247,NM_145074,AF141307	chr2:74609783-74614240	chr2	NC_000002.10	+	74609783	74614240	96	main	NM_013247	HTRA2	HtrA serine peptidase 2
51	cg02154074	TGGGGAACGCGAGTGGGGACAGGGGGGCCTTCAGCTGGGCCCCAGGGAACCGCCCCGTGG[CG]CTCTCGGCCTCGCTCTCACTCACGGTGCTACAGGTGGTAAGCAAATTGACTATGTTGTGG	2	74609742	F	HTRA2;HTRA2;AUP1	6.19904	2560254	0.0269515	1.26042	0.207599	0.0645128	0.509652	2188	2560254	-0.0804426	-3.76921	0.00016539	0.000311265	0.475199	2188	2560254	-0.130199	-6.12218	9.7917e-10	3.28022e-10	0.458302	2188	2560254	NM_181575,AK055566	chr2:74607294-74610455	chr2	NC_000002.10	-	74607294	74610455	114	main	NM_181575	AUP1	ancient ubiquitous protein 1
52	cg02197293	CAGCCCCCCTCGGCGGCCGCACCGACACCGCACCCCAAGTCCTACCCCGGGGCCTGGCGG[CG]CTCCTCGCCGGGATGCCCTAGCTGTGCCGCAAGCTCCCCACGCCCCTCTGCGTCCTTTTT	19	44214998	F	FBXO27;FBXO27	1.32648	3861832	0.0672963	3.15118	0.00163478	0.00100783	0.523701	2188	3861832	0.0429617	2.0099	0.0444992	0.0368515	0.513973	2188	3861832	0.099205	4.6536	3.33164e-06	8.07014e-07	0.531664	2188	3861832	NM_178820,BC014527	chr19:44195144-44240700	chr19	NC_000019.8	-	44195144	44240700	87	main	NM_178820	FBXO27	F-box protein 27
53	cg02228185	AGGAACCCATGGGAATGAGCTAACCGGAGTATTTCTGGTTAAGCATTGGCTAGAGAATGG[CG]CTGAGATTCAGAGAACAGGGCTGGAGGTAAAACCATTTATTACTAACCCCAGAGCAGTGA	17	3326317	F	ASPA;ASPA	-7.78534	3706659	-0.0105568	-0.4936	0.621632	0.161388	0.496905	2188	3706659	-0.0116319	-0.543868	0.586579	0.264048	0.491892	2188	3706659	-0.045849	-2.14516	0.03199	0.00514652	0.484678	2188	3706659	NM_000049,NM_001128085,BC029128	chr17:3322329-3353447	chr17	NC_000017.9	+	3322329	3353447	93	main	NM_000049	ASPA	aspartoacylase (Canavan disease)
54	cg02229946	GTGTGCAGAATTTATATATATAAATATATCTCCTCCAACCCCTCCCAATGAAGCAAGTCA[CG]TGAGTCAATCCTACCCTAAGATATTAGGGATTGAGCCTCCTGGGACATTTGGTGGCTTAG	2	113386383	F	IL1F7;IL1F7;IL1F7;IL1F7	10.5122	2501075	0.038692	1.80994	0.0703727	0.0256411	0.513881	2188	2501075	0.0224165	1.04825	0.294598	0.160012	0.507528	2188	2501075	0.0880868	4.12917	3.69089e-05	8.11062e-06	0.528189	2188	2501075	NM_014439,NM_173202,NM_173204,NM_173203,NM_173205,AF167368	chr2:113387019-113392927	chr2	NC_000002.10	+	113387019	113392927	40	main	NM_014439	IL1F7	interleukin 1 family, member 7 (zeta)
55	cg02309431	GTGGGAGGTCCTTATGCTAGGAGACCTAATGTCTGTGCCTCAGTTTCTCTATCGGAGAGG[CG]ATGTCTCAAGAGGCCTTTCAGGGCTCAGAGTTGAGCTTTCTGAGTTCCACATGGAAGTGA	20	31082592	F	BPIL3	-5.60994	3882214	0.0758605	3.55366	0.000382977	0.000290037	0.526758	2188	3882214	0.00288935	0.135091	0.892552	0.349645	0.501014	2188	3882214	0.0947096	4.44143	9.0973e-06	2.1207e-06	0.53168	2188	3882214	NM_174897,AF465767	chr20:31082354-31095691	chr20	NC_000020.9	+	31082354	31095691	85	main	NM_174897	BPIL3	bactericidal/permeability-increasing protein-like 3
56	cg02480835	GAACGACTCAGTCTCTCAAATCATAGCTAATTCTCCTCTGAGGGCCTTGCTGAAGTTCTG[CG]TTTGCTTGCTCCGCTTTCCTCTCATTTTGGACCTCCAGCCTTCCTGTAGTCCGAGGCCCT	7	23187879	R	NUPL2	1.53111	2992766	-0.0924962	-4.33703	1.46806e-05	1.68671e-05	0.468216	2188	2992766	-0.0520514	-2.43585	0.014891	0.0150598	0.482833	2188	2992766	-0.169225	-7.98892	1.60356e-15	7.85898e-16	0.443047	2188	2992766	NM_007342,U97198	chr7:23188002-23207145	chr7	NC_000007.12	+	23188002	23207145	114	main	NM_007342	NUPL2	nucleoporin like 2
57	cg02503970	CCTCCGGTCTAGGGCTCTTTGTCTTTGCAAAGTGTCGAAACTGTCTGGCATAGTGGGCTC[CG]CCGGCGGAGGCTGGAGCCGAGGAAGCGAGGAGGCGGGATGAGGGTGGGAGAGGGCTCGGG	8	134653327	R	ST3GAL1;ST3GAL1;ST3GAL1;ST3GAL1	25.5851	3154398	-0.00482564	-0.225623	0.821515	0.2014	0.498611	2188	3154398	-0.0294219	-1.37601	0.168899	0.105503	0.489121	2188	3154398	-0.0490573	-2.2955	0.0217459	0.00357741	0.485378	2188	3154398	NM_003033,NM_173344,BX648001	chr8:134535811-134653449	chr8	NC_000008.9	-	134535811	134653449	268	main	NM_003033	ST3GAL1	ST3 beta-galactoside alpha-2,3-sialyltransferase 1
58	cg02631957	TGCCCGAGGCAGAAGGATGTTTGACCTCCGGATAAGCGAGGCGCTGCTGTGCATTCATTC[CG]GGCTGCATCGGTGGCGACAGCAGAGGCTCGGGCGGCGACTCTCCGGCCAGCGGCGGCGGT	5	122875865	R	CSNK1G3;CSNK1G3;CSNK1G3;CSNK1G3;CSNK1G3;CSNK1G3;CSNK1G3;CSNK1G3	-7.43545	2826550	-0.082849	-3.88248	0.000104539	9.32335e-05	0.470891	2188	2826550	0.00266551	0.124625	0.900831	0.351534	0.501567	2188	2826550	-0.0525392	-2.45872	0.0139764	0.00235236	0.480682	2188	2826550	NM_004384,NM_001044723,NM_001031812,NM_001044722,BC047567	chr5:122870131-123119370	chr5	NC_000005.8	+	122870131	123119370	283	main	NM_004384	CSNK1G3	casein kinase 1, gamma 3
59	cg02735486	ACTGTTCAAAATGATGAACGAAGATGCAGCTCAGAAAAGCGACAGTGGAGAGAAGTTCAA[CG]GCAGTAGTCAGAGGAGAAAAAGACCCAAGAAGGTAAATCGCCGGAATTAGGAATGTCTGT	4	114190384	F	ANK2;ANK2;ANK2	4.59477	2740067	0.0842537	3.94862	7.95262e-05	7.36654e-05	0.528048	2188	2740067	0.0603786	2.82642	0.00472456	0.00579663	0.520792	2188	2740067	0.106046	4.97687	6.63991e-07	1.71768e-07	0.535159	2188	2740067	NM_001148,NM_001127493,NM_020977,BX537758	chr4:113846291-114577680	chr4	NC_000004.10	+	113846291	114577680	917	main	NM_001148	ANK2	ankyrin 2, neuronal
60	cg02802055	TCCAGTTTTAATCTTTAAAAAGAAGAAGAAGCAGCAATGCATAAGCTGAGTGATTCCCCG[CG]GAATCCAAAGCTAACAGAGCCAATAAGGCACCTTCGAGGGCATCCCAGCCCAGCTACTGA	9	131636915	F	C9orf78;USP20;USP20;USP20	-24.1172	3191176	-0.0156767	-0.73302	0.463606	0.126531	0.493718	2188	3191176	-0.107114	-5.02736	5.11478e-07	1.74157e-06	0.465713	2188	3191176	-0.0748536	-3.50632	0.000457854	9.06937e-05	0.477365	2188	3191176	NM_006676,NM_001008563,NM_001110303,AY074877	chr9:131636818-131729172	chr9	NC_000009.10	+	131636818	131729172	229	main	NM_006676	USP20	ubiquitin specific peptidase 20
60	cg02802055	TCCAGTTTTAATCTTTAAAAAGAAGAAGAAGCAGCAATGCATAAGCTGAGTGATTCCCCG[CG]GAATCCAAAGCTAACAGAGCCAATAAGGCACCTTCGAGGGCATCCCAGCCCAGCTACTGA	9	131636915	F	C9orf78;USP20;USP20;USP20	-24.1172	3227121	-0.0628513	-2.94247	0.00326979	0.00183446	0.480634	2188	3227121	3.20812e-05	0.00149995	0.998803	0.375172	0.500319	2188	3227121	-0.0337427	-1.57823	0.114589	0.0171394	0.490342	2188	3227121	NM_016520,AF218421	chr9:131629401-131637373	chr9	NC_000009.10	-	131629401	131637373	83	main	NM_016520	C9orf78	chromosome 9 open reading frame 78
61	cg02976574	CTCTTGCAGGAAGCCAGTTGAGGGAAGTTCTCCATGAATGTACGTCACAATGATGATGAC[CG]ACCAAATCCCTCTGGAACTGCCACCATTGCTGAACGGAGAGGTAGCCATGATGCCCCACT	3	173312987	F	FNDC3B;FNDC3B	8.05745	2652410	0.128679	6.0499	1.53349e-09	4.44487e-09	0.544617	2188	2652410	0.213787	10.1522	4.91083e-24	3.70311e-22	0.56721	2188	2652410	0.485923	24.8132	4.90206e-130	1.56196e-128	0.668131	2188	2652410	NM_022763,NM_001135095,AB098597	chr3:173240112-173601176	chr3	NC_000003.10	+	173240112	173601176	631	main	NM_022763	FNDC3B	fibronectin type III domain containing 3B
62	cg03007010	GGTGACAGGGACCTAGGGCCTGGGCTGGGAGGAGGCGGGGCTAGTCCAGGAAGGGACCCG[CG]CCACCCAAGTGGCCCCTGCAGGGGCCTCCTGAGGCTCCTGGGTCCTTCCCCAGCTCCCAT	19	40958680	F	SNX26	-2.20224	3830864	0.101036	4.74006	2.18545e-06	3.14881e-06	0.533694	2188	3830864	0.0323846	1.51466	0.129935	0.0860303	0.509631	2188	3830864	0.154853	7.29883	3.25865e-13	1.39131e-13	0.550311	2188	3830864	NM_052948,AK127255	chr19:40958255-40971564	chr19	NC_000019.8	+	40958255	40971564	183	main	NM_052948	SNX26	sorting nexin 26
63	cg03112869	TTCTTTCTCCTCCACTGCAAAGTTAAATGCGAGAAGGTAGAAACCCAGAGGCCATGCTGG[CG]CTGAGAGATGAGCCCCACTCACCAGATTCAAGATCCCAAGGTAGGCACAGACACAGGGCA	3	48388773	F	FBXW12;FBXW12;FBXW12;FBXW12;FBXW12;FBXW12	9.30996	2621647	0.0285122	1.33344	0.182467	0.0578421	0.510225	2188	2621647	0.0473641	2.21615	0.0267268	0.0243378	0.514804	2188	2621647	0.0598416	2.80122	0.00510928	0.00090681	0.519076	2188	2621647	NM_207102,AY247969	chr3:48388723-48418744	chr3	NC_000003.10	+	48388723	48418744	118	main	NM_207102	FBXW12	F-box and WD repeat domain containing 12
64	cg03172991	TGGAAGGTGTCAGCGTGTGGCTGTGTGATCTTGCATGTGTCTGTGTTCTGCAGGAACATG[CG]TCAGTGTGTGTGCATCAGTGTGCATCTCTATGTGTCATGCACTGGTGTGTCTTCGTGTAT	19	12966728	F	NFIX	-11.9695	3822122	-0.0173138	-0.80958	0.418246	0.116329	0.494793	2188	3822122	-0.000934607	-0.0436973	0.96515	0.36684	0.498182	2188	3822122	0.026002	1.21599	0.224068	0.0319957	0.510097	2188	3822122	NM_002501,BX537794	chr19:12967604-13070605	chr19	NC_000019.8	+	12967604	13070605	262	main	NM_002501	NFIX	nuclear factor I/X (CCAAT-binding transcription factor)
65	cg03258472	AAAGTGTTGGGATTACAGGCGTGAGCCATTGCGCCTGGGCAGGTATTTTTTCTCATTAAG[CG]CTCCCCATCCAAGTCTGCCCTAGGCAGGAGTGCCTAGTGCACGGGTACATACATACCCCG	19	6414949	F	CRB3;CRB3	-3.30181	3818446	0.0567044	2.65404	0.00797735	0.00392838	0.519049	2188	3818446	0.0238197	1.11389	0.265402	0.147687	0.507586	2188	3818446	0.129686	6.09776	1.14008e-09	3.79759e-10	0.545236	2188	3818446	NM_139161,NM_174881,AY103469	chr19:6413405-6418258	chr19	NC_000019.8	+	6413405	6418258	51	main	NM_139161	CRB3	crumbs homolog 3 (Drosophila)
66	cg03340261	AGGGCGTTTGCCACAGCCCCTTAACTCCTTCCAAAACACTCCGCTTAGATACTGATAAGG[CG]CCAACTGCAGCCTGGAGAACCCCTATGCGCCATCTTGGCTTCCCGCAGGCCTCTGCGCCG	6	135417593	F	HBS1L;HBS1L;HBS1L;HBS1L;HBS1L;HBS1L	13.5737	2975287	-0.100215	-4.70131	2.64247e-06	3.73046e-06	0.466013	2188	2975287	-0.0349375	-1.63416	0.1023	0.0715089	0.487224	2188	2975287	-0.142948	-6.72956	1.8521e-11	7.05006e-12	0.450975	2188	2975287	NM_006620,BC040849	chr6:135314409-135417715	chr6	NC_000006.10	-	135314409	135417715	219	main	NM_006620	HBS1L	HBS1-like (S. cerevisiae)
67	cg03387497	CAGCCTCTTCCTGCTGTGTCACCATCTGCGGGAGGTGGTACTCTAGTCTCCCCTAAGACT[CG]GCTTGCCACCTGCACCAGCTCCCTGGGCAAAGGTCACCTGTGTTCTTAATAGAGCAGAGA	20	17628945	F	BANF2;BANF2;BANF2	4.63	3878076	0.0708996	3.32046	0.000904422	0.000606281	0.521883	2188	3878076	0.0200815	0.939028	0.347788	0.180754	0.508443	2188	3878076	0.107837	5.06155	4.28054e-07	1.12734e-07	0.53483	2188	3878076	NM_178477,NM_001014977,BC062735	chr20:17589055-17692101	chr20	NC_000020.9	+	17589055	17692101	145	main	NM_178477	BANF2	barrier to autointegration factor 2
68	cg03535648	ATGGAGTATGTATATGTTCAGCTTTACTAATGCCAAAATGTTTTCCAACATAGTTGTAAG[CG]ATTTGTGCCCTCGATAAGCAGGGTATGAGAATTTCCATTGTTCCATGTCCTAGCTGACTC	12	101116609	F	PMCH	-15.9514	3468301	-0.00995942	-0.465665	0.641496	0.165432	0.49607	2188	3468301	0.0146576	0.68536	0.493174	0.233478	0.506333	2188	3468301	-0.086765	-4.0669	4.82651e-05	1.04771e-05	0.472837	2188	3468301	NM_002674,BC018048	chr12:101108381-101150049	chr12	NC_000012.10	-	101108381	101150049	39	main	NM_002674	PMCH	pro-melanin-concentrating hormone
69	cg03565081	CAAATCTCTCTGCTTCCTTCGATGTTGCCTGTGGCAGAAATTTACATTATCCCTTCAGCC[CG]CTTAAAAAATTCTGTACTTCCCAAGCGGCTAAATTTTTAAAGTCCCTCAACCACAAAAAT	14	22548810	R	C14orf93;C14orf93;C14orf93	7.76301	3557017	0.0229723	1.07425	0.282787	0.0836655	0.508772	2188	3557017	0.0521255	2.43932	0.0147488	0.0149385	0.517115	2188	3557017	0.0806418	3.77859	0.000159301	3.29693e-05	0.526954	2188	3557017	NM_021944,NM_001130706,NM_001130708,BC014299	chr14:22525643-22549195	chr14	NC_000014.7	-	22525643	22549195	107	main	NM_021944	C14orf93	chromosome 14 open reading frame 93
70	cg03623878	AAGTAGAGAGGCAGCCGGGAGCCTGCCTTCTGTGTTCTCGGTGCAGGGGTATTCTGAGAA[CG]GCCCCTGCTCACACGGGTTTAAAAGGAACTCAGTGACCACAGACGGATGAGAACAGCGGA	13	112703561	F	MCF2L;MCF2L	1.94375	3502259	-0.0132253	-0.61838	0.536378	0.143025	0.496396	2188	3502259	-0.0160321	-0.749638	0.453534	0.219941	0.49659	2188	3502259	0.0220627	1.0317	0.302286	0.0421787	0.507479	2188	3502259	NM_001112732,NM_024979,AB002360	chr13:112596579-112801174	chr13	NC_000013.9	+	112596579	112801174	516	main	NM_001112732	MCF2L	MCF.2 cell line derived transforming sequence-like
71	cg03703325	TCCGCAGGGGTCTCCTGGGAGGAACCCACCAGCGATAGGAACACTGAAGCTGGGCTACGG[CG]TCCGCCCGAGCCTTTTCTTAAAGGCGCCGACCCCGGAAGCGGGGCGTCCGAGGGAGCGCG	3	50581868	R	HEMK1	2.0576	2622859	-0.0186154	-0.870456	0.38412	0.108316	0.495013	2188	2622859	-0.131454	-6.18187	6.73486e-10	4.24007e-09	0.458864	2188	2622859	-0.221729	-10.5419	8.956e-26	7.10374e-26	0.426766	2188	2622859	NM_016173,BX537562	chr3:50581597-50605351	chr3	NC_000003.10	+	50581597	50605351	164	main	NM_016173	HEMK1	HemK methyltransferase family member 1
72	cg03724882	ACCTGCGCCCACAGGGCCTGGGGAAACCTTGAGTACGAATGCCACGCCGCGGCTTGTGGG[CG]ACACCACCGCTGTCACCATGCCCCAGGGCCACCTGGCAATGCTGCTCTTTTCCCGTGACG	14	53933994	F	CDKN3;CDKN3	6.08059	3536336	-0.0682277	-3.19493	0.00140647	0.000886476	0.476105	2188	3536336	-0.00926064	-0.432991	0.66506	0.288057	0.495677	2188	3536336	0.00272511	0.127412	0.898626	0.113701	0.502451	2188	3536336	NM_005192,NM_001130851,L27711	chr14:53933336-53956682	chr14	NC_000014.7	+	53933336	53956682	95	main	NM_005192	CDKN3	cyclin-dependent kinase inhibitor 3
73	cg03819692	AAATTGATCAATACGAATGATCACGCCCCATGTGCATCTCCTCAGCAGCCACAAGAGAGA[CG]AGGTCACTGGAGGATAAACATCCGTGACTGCACCTCATGATCCATCACGCACGACGGCCG	16	87753140	F	C16orf81	4.1452	3673880	0.0542306	2.53803	0.0111771	0.00527387	0.519629	2188	3673880	0.0360942	1.6883	0.091425	0.0655108	0.51335	2188	3673880	0.0787891	3.69141	0.000225074	4.59464e-05	0.526037	2188	3673880	NR_024347	chr16:87753129-87758144	chr16	NC_000016.8	+	87753129	87758144	28	main	NR_024347	C16orf81	chromosome 16 open reading frame 81
74	cg03929796	TCTTCCTCCATGTCCAAGACACCCAGCTTAACAACCCTGTAGCCCCCAACTTGGCCCTAG[CG]GCACCTCGCCTCGACCTTGCCATTTTATACTCAATTGGGGCGTAGGGTTCTGAAGCCCAG	3	52206880	F	ALAS1;ALAS1	-19.4101	2623515	0.134233	6.31412	2.90348e-10	9.8356e-10	0.546253	2188	2623515	0.153708	7.244	4.87433e-13	5.58238e-12	0.550934	2188	2623515	0.256497	12.2663	3.27841e-34	3.65613e-34	0.587749	2188	2623515	NM_000688,NM_199166,AY260745	chr3:52194995-52223383	chr3	NC_000003.10	+	52194995	52223383	143	main	NM_000688	ALAS1	aminolevulinate, delta-, synthase 1
75	cg03977782	CATCTCCACTTCTCCAGTCCGCCCTACTCTCCACCCGTGACCTCCAGTGGAGACCCCAGG[CG]GCAGCATCAGTATTTGATCGGCCCTTCGTCAGCACGCTGCCAGCCCTGGCCGGCTGGGTT	3	114734370	F	SIDT1;SIDT1	19.4523	2636483	-0.153744	-7.24569	4.81427e-13	2.97145e-12	0.446583	2188	2636483	-0.214215	-10.1731	3.97465e-24	3.10172e-22	0.430248	2188	2636483	-0.467615	-23.7052	2.71371e-119	5.93406e-118	0.339433	2188	2636483	NM_017699,BC117222	chr3:114733890-114852843	chr3	NC_000003.10	+	114733890	114852843	263	main	NM_017699	SIDT1	SID1 transmembrane family, member 1
76	cg03991512	AGTTGCCACAGGGTAAGCCCAGTGCCCTTTTGCCCAAGGTCAGGTCACTTGGTGCTGGGG[CG]TCACAGAGCCCAGGAAACTTGGGATCAGAACCCCCTGCTCCCCGCTCCCCACCTCATCCC	16	73707957	R	LDHD;LDHD	-7.60434	3699335	0.0858533	4.02395	5.79495e-05	5.59508e-05	0.528097	2188	3699335	0.0216296	1.01144	0.311878	0.166966	0.507118	2188	3699335	0.16272	7.67616	1.88629e-14	8.70341e-15	0.554081	2188	3699335	NM_153486,NM_194436,BC040279	chr16:73700252-73752809	chr16	NC_000016.8	-	73700252	73752809	146	main	NM_153486	LDHD	lactate dehydrogenase D
77	cg04007936	CTGACCCTCACGCAGTGTCCGCCTCCAGGGAACTGTGGAACACGTCGCAGAGAGCTCAAG[CG]CCACGTTTGGATCCCTGAGCAGCTGTCACAAGCCTGCACCCAGGACTGGGGGGCCTGCTG	16	8861518	F	CARHSP1;CARHSP1	-8.44109	3679533	-0.0104272	-0.487537	0.62592	0.162242	0.496702	2188	3679533	0.0136883	0.640032	0.522206	0.243784	0.502043	2188	3679533	-0.00671909	-0.314154	0.753433	0.0971768	0.498105	2188	3679533	NM_001042476,NM_014316,BC108283,AK129643	chr16:8854333-8870357	chr16	NC_000016.8	-	8854333	8870357	103	main	NM_001042476	CARHSP1	calcium regulated heat stable protein 1, 24kDa
78	cg04014889	GAGGGAGCAAAGGTCTCCGGTGTGGCAGGCAGGTTTTTCCAGGCAGCTGGCAGGTGTGCT[CG]CGCAGCTGACACTGCCTTGGGAGCACAGAAGGTGGCAGCAAAGATCATGCGGTCTTTTGA	15	21441686	R	MAGEL2	-7.92458	3613706	0.0195138	0.912476	0.361588	0.103057	0.508088	2188	3613706	0.014148	0.661529	0.508329	0.239001	0.50426	2188	3613706	0.0395389	1.84959	0.0644374	0.00997246	0.513581	2188	3613706	NM_019066,BC063834	chr15:21439798-21444116	chr15	NC_000015.8	-	21439798	21444116	43	main	NM_019066	MAGEL2	MAGE-like 2
79	cg04084157	AGGGTGCCTGCCTCTCCCGGCCTGCGCCTGCGCGCTGGGGCCTTCGGCTGAAGGGGTGTG[CG]CTAGCGGAGCTCCGGGAAATGAATGAATGAATGAATGAATGAAATGCTGAAGCGGGCAGG	7	100595769	F	VGF	31.6217	3064462	0.021847	1.02161	0.307038	0.0897586	0.506535	2188	3064462	0.0482714	2.25867	0.0239474	0.0223217	0.514076	2188	3064462	0.0983815	4.61472	4.01782e-06	9.66195e-07	0.53342	2188	3064462	NM_003378,BC063835	chr7:100592516-100598894	chr7	NC_000007.12	-	100592516	100598894	73	main	NM_003378	VGF	VGF nerve growth factor inducible
80	cg04087608	TAAGGCATCTGCTGAGTGTATAACCATTTTACCTCTTGTTTTTAGCCCTCTTCTGGGTCA[CG]CTAGAATCAGATCTGCTCTCCAGCATCTTCTGTTTCCTGGCAAGTGTTTCCTGCTACTTT	1	119759492	R	HSD3B2;HSD3B2	2.38306	2354433	0.0158052	0.73903	0.45995	0.125762	0.506609	2188	2354433	-0.000481809	-0.0225268	0.98203	0.370718	0.495896	2188	2354433	0.0587152	2.74837	0.00600944	0.00105707	0.518964	2188	2354433	NM_000198,BC131488,BC031999,AF252254	chr1:119759250-119931669	chr1	NC_000001.9	+	119759250	119931669	316	main	NM_000198	HSD3B2	hydroxy-delta-5-steroid dehydrogenase, 3 beta- and steroid delta-isomerase 2
81	cg04169469	GACGCCGGCCCGAGGTGGCGCCGGAGCTGCTGGCAGAGGGGCGGCGGGCGGCGGCGGCGG[CG]GCTACAGGAGGGACTGACAAAGCCCCACGGCACGCCGCTCCCTACTTATAGCACCGGCGG	2	10505885	F	ODC1;ODC1;SNORA80B	4.92692	2540157	-0.12048	-5.66048	1.57726e-08	3.70654e-08	0.460093	2188	2540157	-0.0330731	-1.54688	0.121968	0.0820769	0.487807	2188	2540157	-0.0845237	-3.96133	7.54175e-05	1.60754e-05	0.470937	2188	2540157	NM_002539,AK292352	chr2:10485474-10606340	chr2	NC_000002.10	-	10485474	10606340	199	main	NM_002539	ODC1	ornithine decarboxylase 1
82	cg04333463	CCCCGGTCCGCCTGGCCCCTCGCCCGCCCGCCAGGCCCGCCGAATGCGGCCTCCGCCCCG[CG]CGCCTAAAGGAGGAGCGTCGCGGGGGATGGAGGCGGCGCGCGGTGGGACCTGGGGAGATG	8	62789241	F	ASPH;ASPH;ASPH;ASPH;ASPH	0.164994	3137530	0.056781	2.65764	0.00789285	0.00389407	0.519492	2188	3137530	0.181184	8.56575	1.33065e-17	3.42157e-16	0.557603	2188	3137530	0.362675	17.7651	5.3499e-69	2.1617e-68	0.622911	2188	3137530	NM_004318,NM_032468,NM_032466,NM_032467,NM_020164,U03109	chr8:62571397-62831797	chr8	NC_000008.9	-	62571397	62831797	534	main	NM_004318	ASPH	aspartate beta-hydroxylase
83	cg04359302	CGAACTCCTCACCTCAAATGATCCGCCCACCTCAGCCTCCCAAAGTGCTGGGATTATAGG[CG]TAAGCCACTGCACCTGACCAATACAGTCTTAATAGGGCTATTTGGACCTCCTTGGAGACA	3	180806553	F	MRPL47;MRPL47;NDUFB5	0.25579	2654069	-0.0953881	-4.47344	7.83932e-06	9.7865e-06	0.469625	2188	2654069	-0.022755	-1.06409	0.287365	0.157063	0.493768	2188	2654069	-0.160952	-7.59127	3.62398e-14	1.6439e-14	0.444653	2188	2654069	NM_002492,BC017909	chr3:180805105-180828129	chr3	NC_000003.10	+	180805105	180828129	68	main	NM_002492	NDUFB5	NADH dehydrogenase (ubiquinone) 1 beta subcomplex, 5, 16kDa
83	cg04359302	CGAACTCCTCACCTCAAATGATCCGCCCACCTCAGCCTCCCAAAGTGCTGGGATTATAGG[CG]TAAGCCACTGCACCTGACCAATACAGTCTTAATAGGGCTATTTGGACCTCCTTGGAGACA	3	180806553	F	MRPL47;MRPL47;NDUFB5	0.25579	2706985	-0.0744444	-3.48708	0.000492019	0.00036014	0.474765	2188	2706985	-0.0140809	-0.658393	0.510341	0.239662	0.495927	2188	2706985	-0.143274	-6.74513	1.6652e-11	6.36194e-12	0.45137	2188	2706985	NM_020409,NM_177988,BC032522	chr3:180783767-180805433	chr3	NC_000003.10	-	180783767	180805433	73	main	NM_020409	MRPL47	mitochondrial ribosomal protein L47
84	cg04416752	GAGACCTCCTGCCAACCCAATTCCCAGTGCGCAGATGGGGAGGAAGAGGCAGCGAGGAGG[CG]CCCCCAGCTCAAGGTCACCCATCAGGTCTGGGGCAGAGAGAGCCAGAAGCCCGGAATTCC	9	129718848	F	ST6GALNAC4;ST6GALNAC4	-5.33826	3226181	0.0218097	1.01987	0.307867	0.0899569	0.505955	2188	3226181	0.0511952	2.39571	0.0166244	0.0164923	0.516085	2188	3226181	0.0902054	4.22902	2.38242e-05	5.34535e-06	0.531465	2188	3226181	NM_175039,NM_175040,BC036705	chr9:129707738-129719167	chr9	NC_000009.10	-	129707738	129719167	90	main	NM_175039	ST6GALNAC4	ST6 (alpha-N-acetyl-neuraminyl-2,3-beta-galactosyl-1,3)-N-acetylgalactosaminide alpha-2,6-sialyltransferase 4
85	cg04424621	CACCCTACTGCATGTTGCAAAGTATTCCTTTAAAATGAAGTGAGTAAAATACTGGGATGA[CG]TTATCTGGAGCCCAAGAAAGATGGCTCATTTGGAAAGGCCTAATATCCCAAGTTGCTTAC	6	27209920	F	HIST1H2BJ	-14.4478	2946681	-0.0715116	-3.34922	0.000815716	0.000554074	0.47508	2188	2946681	-0.00484226	-0.2264	0.820911	0.331089	0.497515	2188	2946681	-0.00951493	-0.444881	0.656445	0.0857317	0.498841	2188	2946681	NM_021058	chr6:27167204-27209078	chr6	NC_000006.10	-	27167204	27209078	121	main	NM_021058	HIST1H2BJ	histone cluster 1, H2bj
86	cg04480914	GGCCGGGTGGGGGGAGGTGACTTGATGTCATCCTGAGCAGCTGGGCGGCGGGTGCCGGTG[CG]CACGGAGCCGAGCCGGGGCTCCCGTTGCGCTGCACCGCGTTGGGTCGGAGTCCCAGGACT	11	64448774	R	PPP2R5B;PPP2R5B	-4.21563	3334749	0.0331045	1.54836	0.121613	0.0409318	0.511055	2188	3334749	0.0531623	2.48793	0.0128803	0.0133874	0.515658	2188	3334749	0.127158	5.97759	2.39011e-09	7.72044e-10	0.544151	2188	3334749	NM_006244,BC045619	chr11:64447459-64458521	chr11	NC_000011.8	+	64447459	64458521	113	main	NM_006244	PPP2R5B	protein phosphatase 2, regulatory subunit B', beta isoform
122	cg06533629	TGTCTTTCGGTTCATAATTGCGATTGTTAGCGAAGTGGTCTCGAATTCCATTTCACTCCC[CG]TTCGCCGCTCTCAGACTAAATTGCAAATATCCCCAAGTCTGTAGCAAAAAAAGTTTTCTC	7	130069910	R	KLF14	16.0562	3072703	0.0708965	3.32031	0.0009049	0.000606505	0.524565	2188	3072703	0.021071	0.985316	0.324542	0.172126	0.508036	2188	3072703	0.12433	5.84326	5.37873e-09	1.69137e-09	0.542436	2188	3072703	NM_138693,AF490374	chr7:130067834-130139702	chr7	NC_000007.12	-	130067834	130139702	100	main	NM_138693	KLF14	Kruppel-like factor 14
106	cg05473871	GGTCCTGCCCCTCACCCCTCTCGCGGGGGGTCGACCTGCTCGTGGATGGGGACCCTGGCG[CG]CCTGGGCTCCCATCCGGGGGTTCCCCGACCCAGGTCCCGGTCACCCCCAGCGCAGGGCCC	19	1464513	F	ADAMTSL5	-5.15605	3845263	0.0780988	3.65894	0.000255529	0.00020411	0.527939	2188	3845263	-0.0650565	-3.046	0.00233009	0.00316874	0.479517	2188	3845263	-0.00584739	-0.273396	0.784574	0.100733	0.498325	2188	3845263	NM_213604,BC119796	chr19:1456033-1474433	chr19	NC_000019.8	-	1456033	1474433	100	main	NM_213604	ADAMTSL5	ADAMTS-like 5
89	cg04616566	TCAGCTCGTGGGCTGCCAGCGTGCAACCTCTCACCTAGATAATGGTATATAATATAAATA[CG]TTTCCCTTCCCCCCTTTTTTCTCTTCCTCCTCTTTCTCCTTTCCCTCCCATTTTCCACAT	15	69807614	R	THSD4	0.0685317	3600283	0.0935599	4.3872	1.16797e-05	1.38164e-05	0.531858	2188	3600283	0.0378877	1.77228	0.0764176	0.0568702	0.510959	2188	3600283	0.117074	5.499	3.97298e-08	1.15709e-08	0.538011	2188	3600283	NM_024817,BC140868	chr15:69200087-69862756	chr15	NC_000015.8	+	69200087	69862756	650	main	NM_024817	THSD4	thrombospondin, type I, domain containing 4
90	cg04718414	GGTGGGTGGTCCGGCCCCGAGCCCTCCTGACTCTCTCGCCAATGCCCAGAGGCGCCGCAG[CG]ATTCCAGGGAGGCCGCGCTCTCGCCCCAAGGCAACCAGAAGCCCACGTGCCAGGAGAGGC	13	114018313	F	CDC16;CDC16	-5.45261	3503164	-0.129403	-6.0843	1.23945e-09	3.648e-09	0.456397	2188	3503164	-0.09739	-4.56792	5.02427e-06	1.38136e-05	0.469882	2188	3503164	-0.339784	-16.5441	2.91833e-60	8.66729e-60	0.385478	2188	3503164	NM_001078645,NM_003903,AB209850	chr13:114018476-114056249	chr13	NC_000013.9	+	114018476	114056249	178	main	NM_001078645	CDC16	cell division cycle 16 homolog (S. cerevisiae)
91	cg04736140	GTTCTCATCCCATATGCCTTTGTCCAAAGGTTGCACGGGGGTTAAGCTTGGCCCAGAAGG[CG]CCGAGGGCTGGTCGAGTTCTCCCCTTTCCAAGAACCAGCCGAATCTCCCTCCCGCAGATC	1	166371941	R	GPR161	-16.1177	2442911	0.0761797	3.56867	0.000361737	0.000276295	0.527378	2188	2442911	0.0451174	2.11088	0.0348338	0.0302144	0.514476	2188	2442911	0.121367	5.70259	1.23451e-08	3.76056e-09	0.540452	2188	2442911	NM_153832,BC028163	chr1:166301516-166373435	chr1	NC_000001.9	-	166301516	166373435	204	main	NM_153832	GPR161	G protein-coupled receptor 161
92	cg04755031	TGATCGGGACGAGGAAGGGTCACTCCGTGACCCGGGATAGGGCCGGGATGCAGCCTTGGA[CG]GGGCTGGGCCCAAATGTGGGCTCTGGAGGGAGCCGGGCTGGGGCTGGTGCTGGTGCTCCC	22	42619174	R	PNPLA5;PNPLA5	3.81719	3963135	0.0643379	3.01226	0.00260496	0.00150346	0.521688	2188	3963135	0.0645675	3.02304	0.0025141	0.00337657	0.520956	2188	3963135	0.171897	8.11758	5.66085e-16	2.84693e-16	0.557758	2188	3963135	NM_138814,BC031820	chr22:42590794-42619226	chr22	NC_000022.9	-	42590794	42619226	87	main	NM_138814	PNPLA5	patatin-like phospholipase domain containing 5
93	cg04818845	CAGCGGGAGATCAAGTGAGCCTCAAAACATTAGAAAAACCCAAGCCAGTCTGCAGAGCAC[CG]CAGCCGCCTCAGGGCCGGTTACCATAGCTACCCTTGGCTTCCCAGCCCAGCACATGTCTG	1	6502754	R	PLEKHG5	0.530064	2394726	0.0465371	2.1774	0.0294987	0.0121405	0.515759	2188	2394726	0.0494612	2.31443	0.0206845	0.019786	0.51685	2188	2394726	0.11549	5.42392	6.05279e-08	1.73237e-08	0.537427	2188	2394726	NM_198681,NM_020631,NM_001042663,NM_001042664,NM_001042665,AK131074	chr1:6449462-6502698	chr1	NC_000001.9	-	6449462	6502698	216	main	NM_198681	PLEKHG5	pleckstrin homology domain containing, family G (with RhoGef domain) member 5
94	cg04836038	CTCTGCGGGGACAGAGGTCTCAGGAAAGTAGCCTTTATTTATGTGGCACCGATCGGAACC[CG]CGGCCGGCCAGGCGGACCTGGACGGAGCGTCCCTGCTCGGAACCTGGCGCGGGGCGCCGC	13	98537383	R	DOCK9;DOCK9	10.6546	3522398	-0.243035	-11.595	8.78001e-31	1.08383e-28	0.415737	2188	3522398	-0.195099	-9.24024	3.28016e-20	1.28736e-18	0.435531	2188	3522398	-0.367092	-18.0033	9.08464e-71	3.87431e-70	0.376806	2188	3522398	NM_001130048,NM_015296,NM_001130050,NM_001130049,AB028981	chr13:98243747-98536880	chr13	NC_000013.9	-	98243747	98536880	694	main	NM_001130048	DOCK9	dedicator of cytokinesis 9
95	cg05087948	AGGGTAGGGAGAGCGGGAGGCTGCTGGCCTGAGGCTAAAGCTAGTCACTGACCTCTATCA[CG]TGCTTGTTATATGTTAGGCATGATATGCCAGCTCCTTTTATTCGGCGTAGCAATCTCTGA	11	66092773	R	CTSF	-6.99123	3378344	0.0362149	1.69396	0.0903457	0.0317791	0.512096	2188	3378344	0.000329397	0.0154009	0.987714	0.372194	0.50077	2188	3378344	0.0689822	3.23037	0.00124347	0.000235199	0.521735	2188	3378344	NM_003793,AF136279	chr11:66087520-66092651	chr11	NC_000011.8	-	66087520	66092651	85	main	NM_003793	CTSF	cathepsin F
96	cg05089968	TCCACAAAGTACTTTCCATCAGATACACTTTTCTGATGGAAACCAGGTGTGTGATGGTTA[CG]GCCCCAGGTTAGCTCCAGAGCACATTCAACTGTGGGTAAACACAAATGTGCCCTGTGCCA	6	166642763	F	PRR18	-3.91161	2984543	0.0519042	2.42895	0.0151771	0.0068628	0.51707	2188	2984543	0.0195576	0.914527	0.36051	0.185698	0.50715	2188	2984543	0.112203	5.26822	1.42453e-07	3.93038e-08	0.538303	2188	2984543	NM_175922,BC034775	chr6:166606883-166643022	chr6	NC_000006.10	-	166606883	166643022	98	main	NM_175922	PRR18	proline rich region 18
97	cg05125838	TTAATGCCCCCCAGAATCAGCACCATGTCATCACAGGCTTGGGTCAAGGGGCGGGTCAGA[CG]CCAGTCACATCCGCTCACTGCCCACAGCCACCCCCCCACAGTGAGTCATCTGCCAGGGTG	3	48576589	R	UCN2;COL7A1	-4.60256	2673345	0.102051	4.78802	1.72438e-06	2.53409e-06	0.534322	2188	2673345	0.0672662	3.14976	0.00164271	0.00233969	0.522014	2188	2673345	0.161697	7.62703	2.75491e-14	1.25863e-14	0.554434	2188	2673345	NM_000094,L02870	chr3:48570529-48607694	chr3	NC_000003.10	-	48570529	48607694	567	main	NM_000094	COL7A1	collagen, type VII, alpha 1
97	cg05125838	TTAATGCCCCCCAGAATCAGCACCATGTCATCACAGGCTTGGGTCAAGGGGCGGGTCAGA[CG]CCAGTCACATCCGCTCACTGCCCACAGCCACCCCCCCACAGTGAGTCATCTGCCAGGGTG	3	48576589	R	UCN2;COL7A1	-4.60256	2673503	0.0390227	1.82542	0.0680041	0.0249165	0.513303	2188	2673503	0.0365397	1.70917	0.0874918	0.0632666	0.512228	2188	2673503	0.122727	5.76714	8.45143e-09	2.61121e-09	0.539207	2188	2673503	NM_033199,BC002647	chr3:48574164-48576205	chr3	NC_000003.10	-	48574164	48576205	20	main	NM_033199	UCN2	urocortin 2
98	cg05228408	GGTGTCCTGCCTGGGGTATCCCCAGAGTTTGGCACACGGTGATAGCCAACATTCACTGAG[CG]CCAAAGGGCCAGGTGCTGCCACTCTCTCAAAATAAGCCTCTGCCACTTACTGAACAACTA	1	11787939	R	CLCN6;CLCN6;MTHFR;CLCN6;CLCN6	-4.4943	2320472	0.0529718	2.479	0.013207	0.00607969	0.517227	2188	2320472	-0.0214928	-1.00504	0.31495	0.168217	0.495422	2188	2320472	-0.140339	-6.60507	4.29909e-11	1.59601e-11	0.452746	2188	2320472	NM_001286,NM_021736,NM_021735,NM_021737,AK289999	chr1:11788722-11830705	chr1	NC_000001.9	+	11788722	11830705	231	main	NM_001286	CLCN6	chloride channel 6
98	cg05228408	GGTGTCCTGCCTGGGGTATCCCCAGAGTTTGGCACACGGTGATAGCCAACATTCACTGAG[CG]CCAAAGGGCCAGGTGCTGCCACTCTCTCAAAATAAGCCTCTGCCACTTACTGAACAACTA	1	11787939	R	CLCN6;CLCN6;MTHFR;CLCN6;CLCN6	-4.4943	2396817	0.0887725	4.16148	3.20674e-05	3.36054e-05	0.531555	2188	2396817	0.000165684	0.00774652	0.99382	0.37376	0.502108	2188	2396817	-0.0562356	-2.63206	0.0085119	0.00147091	0.482287	2188	2396817	NM_005957,AB209113	chr1:11768367-11789554	chr1	NC_000001.9	-	11768367	11789554	113	main	NM_005957	MTHFR	5,10-methylenetetrahydrofolate reductase (NADPH)
99	cg05270634	CTGCAAGATCGTGGTGGTGGGAGACGCAGAGTGCGGCAAGACGGCGCTGCTGCAGGTGTT[CG]CCAAGGACGCCTATCCCGGGGTGAGGGACCTGCGTCTTGGGAGGGGGACGCTAAGGCTGC	17	38430971	R	RND2	9.45868	3722355	0.0171834	0.803483	0.42176	0.117159	0.503488	2188	3722355	0.0631958	2.95864	0.00310328	0.00404798	0.521183	2188	3722355	0.080642	3.77859	0.000159297	3.29693e-05	0.526404	2188	3722355	NM_005440,BC094842	chr17:38426774-38440300	chr17	NC_000017.9	+	38426774	38440300	57	main	NM_005440	RND2	Rho family GTPase 2
100	cg05294243	GATGTCTCCAGGCACCCCCGACCTGGGCTTGGCCCTCTGCTTGGGGCGGAGCTTCCAGGA[CG]TGCTGGGACCTAGGTCTGACCCCGCCCAAGGCAGAGTTGAACCCACTGTGAACTTTCAGG	19	56260918	F	KLK13	10.4337	3868876	0.0726724	3.40378	0.000669228	0.0004679	0.524191	2188	3868876	0.0295596	1.38245	0.166912	0.104504	0.508843	2188	3868876	0.098944	4.64128	3.53595e-06	8.54555e-07	0.533253	2188	3868876	NM_015596,AY923172	chr19:56251275-56261425	chr19	NC_000019.8	-	56251275	56261425	55	main	NM_015596	KLK13	kallikrein-related peptidase 13
101	cg05316065	CTGAGCAAGTCTTTGATTCATGGATTCCCAGCAACTCTAGCTGGAACAACTTCTTTGGCT[CG]TATTCCTCTGGTATATGTGCTGAATTTAGAATTCAATCACTGGACACCAGGAAAGGCAAC	8	130868189	R	GSDMC;GSDMC	-14.2287	3153298	0.0532598	2.4925	0.0127158	0.00588352	0.519463	2188	3153298	0.0447481	2.09358	0.03635	0.031272	0.513088	2188	3153298	0.105051	4.92979	8.45019e-07	2.16489e-07	0.534333	2188	3153298	NM_031415,AB042405	chr8:130829624-130872233	chr8	NC_000008.9	-	130829624	130872233	110	main	NM_031415	GSDMC	gasdermin C
102	cg05422352	CTTAGTTAACTCACCTGAAAAATGGGAACAATAATACAAGCCACAGTTATGAGAATTCAA[CG]AGATAATGCATGTACAGCACCTGGCACATGGTAAAACGCTCAATAAGTGGTAGTTAGTAG	2	232358991	F	COPS7B	0.965636	2532064	-0.0570839	-2.67185	0.00756677	0.00375971	0.480605	2188	2532064	-0.114094	-5.35777	8.73182e-08	3.52171e-07	0.46628	2188	2532064	-0.263235	-12.6042	5.27111e-36	6.27365e-36	0.411946	2188	2532064	NM_022730,BC091493	chr2:232354256-232382342	chr2	NC_000002.10	+	232354256	232382342	108	main	NM_022730	COPS7B	COP9 constitutive photomorphogenic homolog subunit 7B (Arabidopsis)
103	cg05440289	GAGTCTGGTAAGTGTCGGATGGTAGAACCAGGGTTGGGACTCGGGACCTCCAACAGCATA[CG]ATGTGGTGGGGGTGGGCAGCCTGGGTGGGGGTGGGCATTACTCTGGGGCTGGATTCAGCT	1	151147743	R	IVL	1.54719	2359470	0.0171894	0.803762	0.421599	0.11713	0.50714	2188	2359470	0.0408104	1.90914	0.056307	0.0446255	0.514889	2188	2359470	0.0794303	3.72158	0.000199863	4.09913e-05	0.528033	2188	2359470	NM_005547,AK300492	chr1:151147663-151150984	chr1	NC_000001.9	+	151147663	151150984	23	main	NM_005547	IVL	involucrin
104	cg05441133	CTCTCACCCGCTGCCGGGCTGGATTGTCCTCCACTTGTGCTTATCTGGTCCTCGATGCCG[CG]CTCCGACGTCTTATCTGAGGGAGCCTTCCGTTAATGAAGGCTCTATAAACATCTGACAAA	10	48036897	F	GDF2	3.10376	3287781	0.0658814	3.08473	0.00204746	0.00122692	0.5225	2188	3287781	0.0214977	1.00527	0.31484	0.168202	0.505323	2188	3287781	0.0285434	1.3349	0.181989	0.0264043	0.509691	2188	3287781	NM_016204,AF188285	chr10:48031789-48036859	chr10	NC_000010.9	-	48031789	48036859	34	main	NM_016204	GDF2	growth differentiation factor 2
105	cg05442902	GCCAGGTCACCCTCTCACTCTGTGCCTCTTAGTTATCTTGCATGCTCTGGTCTTTGCATA[CG]CTGCTCCCTGCACCAGGAACCTCCATCCCCATCTTTGTCTGCTTGTCGAACTTCAGAAAT	22	19699010	R	MGC16703;P2RX6;P2RX6	-3.9661	3937900	0.0856556	4.01464	6.02784e-05	5.78402e-05	0.528854	2188	3937900	0.0227146	1.06219	0.288223	0.157467	0.506898	2188	3937900	0.139801	6.57945	5.1034e-11	1.88457e-11	0.546802	2188	3937900	NM_005446,NR_002829,AB002058	chr22:19699336-19713119	chr22	NC_000022.9	+	19699336	19713119	82	main	NM_005446	P2RX6	purinergic receptor P2X, ligand-gated ion channel, 6
105	cg05442902	GCCAGGTCACCCTCTCACTCTGTGCCTCTTAGTTATCTTGCATGCTCTGGTCTTTGCATA[CG]CTGCTCCCTGCACCAGGAACCTCCATCCCCATCTTTGTCTGCTTGTCGAACTTCAGAAAT	22	19699010	R	MGC16703;P2RX6;P2RX6	-3.9661	3953879	0.0588593	2.75513	0.00588677	0.00303454	0.519513	2188	3953879	0.016488	0.770961	0.440793	0.21546	0.504921	2188	3953879	0.0250753	1.17263	0.241021	0.0341864	0.507019	2188	3953879	NR_003608,BC009991	chr22:19686901-19698629	chr22	NC_000022.9	-	19686901	19698629	82	main	NR_003608	MGC16703	tubulin, alpha pseudogene
107	cg05492270	GAGCCGCCGATTGGCTAGGAGCACTTGAGCAGCGGAAGCAGCTGGCTCGCGCGGGGACTG[CG]GTGAGGGGGCGAGCCGTGAAGATGGCGGCAGTGGTGGAGGTGGAGGTTGGAGGTGGTGCT	11	71317733	R	RNF121;LOC100133315;RNF121;RNF121;RNF121	-16.7311	3339230	0.0126974	0.593696	0.552766	0.146622	0.503019	2188	3339230	-0.021603	-1.0102	0.312475	0.167166	0.496273	2188	3339230	-0.0916974	-4.29936	1.74028e-05	3.96159e-06	0.471889	2188	3339230	NM_018320,NR_024148,NR_024147,BC009672	chr11:71317756-71386285	chr11	NC_000011.8	+	71317756	71386285	111	main	NM_018320	RNF121	ring finger protein 121
108	cg05501584	GCATTACCCCTTGTGGGAGCCATATTTTTCTAGAAGGCATTTTGATCAAGACAGGCCTCC[CG]CGGTTATTGATCTTAGGGTCATTGAGAGTCCAAGAACTGGGGAGATGAAGGCCACCCGGC	15	90737310	R	ST8SIA2	-0.164582	3608952	0.036169	1.69181	0.0907545	0.0318988	0.510963	2188	3608952	-0.0120559	-0.563696	0.573009	0.259574	0.495745	2188	3608952	0.0570655	2.67098	0.00758626	0.00131924	0.518655	2188	3608952	NM_006011,BC096202	chr15:90733404-90915285	chr15	NC_000015.8	+	90733404	90915285	191	main	NM_006011	ST8SIA2	ST8 alpha-N-acetyl-neuraminide alpha-2,8-sialyltransferase 2
108	cg05501584	GCATTACCCCTTGTGGGAGCCATATTTTTCTAGAAGGCATTTTGATCAAGACAGGCCTCC[CG]CGGTTATTGATCTTAGGGTCATTGAGAGTCCAAGAACTGGGGAGATGAAGGCCACCCGGC	15	90737310	R	ST8SIA2	-0.164582	3609004	-0.00982041	-0.459165	0.646156	0.166378	0.496169	2188	3609004	0.0191746	0.89661	0.369996	0.189239	0.505482	2188	3609004	0.0665406	3.11569	0.00184457	0.000343134	0.522377	2188	3609004	NM_006011,AY358091	chr15:90810832-90812962	chr15	NC_000015.8	+	90810832	90812962	8	main	NM_006011	ST8SIA2	ST8 alpha-N-acetyl-neuraminide alpha-2,8-sialyltransferase 2
109	cg05532892	TGGGGGGCGCTGGCTGCCTGCTGGCCCTGGGGTTGGATCACTTCTTTCAAATCAGGGAAG[CG]CCTCTTCATCCTCGACTGTCCAGTGCCGCCGAAGAAAAAGTGCCTGTGATCCGACCCCGG	11	14623012	R	PDE3B;PSMA1	6.72946	3321512	-0.110225	-5.17455	2.35737e-07	4.30635e-07	0.461848	2188	3321512	-0.0899633	-4.21761	2.50585e-05	5.81914e-05	0.468432	2188	3321512	0.0943703	4.42542	9.79638e-06	2.27795e-06	0.531214	2188	3321512	NM_000922,BC150307	chr11:14580919-14853398	chr11	NC_000011.8	+	14580919	14853398	275	main	NM_000922	PDE3B	phosphodiesterase 3B, cGMP-inhibited
109	cg05532892	TGGGGGGCGCTGGCTGCCTGCTGGCCCTGGGGTTGGATCACTTCTTTCAAATCAGGGAAG[CG]CCTCTTCATCCTCGACTGTCCAGTGCCGCCGAAGAAAAAGTGCCTGTGATCCGACCCCGG	11	14623012	R	PDE3B;PSMA1	6.72946	3363979	-0.080458	-3.76994	0.000164912	0.000139265	0.472037	2188	3363979	0.00949522	0.443959	0.657111	0.285854	0.502733	2188	3363979	-0.0737551	-3.45467	0.000554998	0.000108863	0.474529	2188	3363979	NM_148976,NM_002786,M64992	chr11:14482772-14621739	chr11	NC_000011.8	-	14482772	14621739	201	main	NM_148976	PSMA1	proteasome (prosome, macropain) subunit, alpha type, 1
110	cg05697249	ACCCGGAAATGCACAAGCCTCTTGATGCATAAAAACAGCTGGGCTCCCTTGGAGACAGAG[CG]CCATGGGAAACCGGGTCTGCTGCGGAGGAAGCTGGTGAGTAGGCTGGAAGGGCAAAGGGG	11	111294903	R	C11orf52;C11orf52	-0.297183	3348773	0.054785	2.56402	0.0103746	0.0049429	0.520605	2188	3348773	0.0357005	1.66987	0.0950172	0.0675549	0.509947	2188	3348773	0.129248	6.07693	1.2974e-09	4.2985e-10	0.543312	2188	3348773	NM_080659,BC110872	chr11:111294907-111302804	chr11	NC_000011.8	+	111294907	111302804	29	main	NM_080659	C11orf52	chromosome 11 open reading frame 52
111	cg05759269	CCAAGTAAAAAAAGCCAGATTTGTGGCTCACTTCGTGGGGAAATGTGTCCAGCGCACCAA[CG]CAGGCGAGGGACTGGGGGAGGAGGGAAGTGCCCTCCTGCAGCACGCGAGGTTCCGGGACC	6	36754231	R	CDKN1A;CDKN1A	-9.04721	2905169	-0.018848	-0.881339	0.378203	0.106921	0.493018	2188	2905169	0.000676192	0.0316151	0.974782	0.3689	0.500086	2188	2905169	0.0487254	2.27995	0.0226532	0.00371955	0.5142	2188	2905169	NM_078467,NM_000389,BC000312	chr6:36752283-36763796	chr6	NC_000006.10	+	36752283	36763796	97	main	NM_078467	CDKN1A	cyclin-dependent kinase inhibitor 1A (p21, Cip1)
112	cg05851163	CTCCGACCCTGCCGCCCCCATTCTCCGCTCCCCGCTCTGGGGCTGAGTGAGGCAGGATGG[CG]AGAGACCCCTGAGCCACCAAGTCCGCTTACCTCAGGCAGATCCCGACGGGGGCTCGGCGC	18	63334546	F	DSEL	-8.0565	3812074	-0.0558154	-2.61235	0.00901808	0.00437214	0.4802	2188	3812074	-0.110048	-5.16617	2.46505e-07	9.02044e-07	0.461635	2188	3812074	-0.0921479	-4.3206	1.58135e-05	3.61085e-06	0.471075	2188	3812074	NM_032160,AF480435	chr18:63324804-63335197	chr18	NC_000018.8	-	63324804	63335197	41	main	NM_032160	DSEL	dermatan sulfate epimerase-like
113	cg05898102	AAAGAGACGGTTTGGGAATTGCTCTGAGGATGCTATGCAAGTCACTAATAAAGGAAGACA[CG]GACAGATGAACTTAAAAGAGAAGCTTTAGCTGCCAAAGATTGGGAAAGGGAAAGGACAAA	5	140552143	F	PCDHB10;PCDHB10	1.20203	2832423	0.0341333	1.59651	0.11045	0.0376967	0.510324	2188	2832423	0.0251851	1.17777	0.238967	0.136957	0.506647	2188	2832423	0.0145128	0.678589	0.497455	0.066675	0.504579	2188	2832423	NM_018930,AY358720	chr5:140552146-140555393	chr5	NC_000005.8	+	140552146	140555393	26	main	NM_018930	PCDHB10	protocadherin beta 10
114	cg06134964	GAGTTTTCCTCTCACACTTGACCCTGATTTTGTTTTGCAGAAGCGACAGGCTGTGGACAC[CG]TGAGTAAGAGTCCTGGCAAAGGGGTCTGTGACAGAGCCCTTTTTACAGGCTTGCTTTCCC	3	52787073	R	ITIH1;ITIH1	5.64269	2624147	0.0867799	4.0676	4.81206e-05	4.78944e-05	0.529564	2188	2624147	0.0421912	1.97381	0.0484626	0.0394232	0.514415	2188	2624147	0.13731	6.46067	1.12071e-10	4.03824e-11	0.546184	2188	2624147	NM_002215,X63652	chr3:52784532-52801117	chr3	NC_000003.10	+	52784532	52801117	115	main	NM_002215	ITIH1	inter-alpha (globulin) inhibitor H1
115	cg06144905	CTGACCTCACCACCCACCAGGGAGGTGGGTCTTATTCTGGGCATCGTGCCAAGTTCTTAG[CG]GGGCCCTCTAGAATCTCTAAAGCAAATCAGGCTGAAGAGGGGAAAACCAGCAGGGGGAGG	17	24393906	F	PIPOX	3.41348	3715935	0.0628004	2.94008	0.00329511	0.00184595	0.521766	2188	3715935	0.0434503	2.03279	0.0421299	0.0352724	0.51342	2188	3715935	0.129878	6.10689	1.0771e-09	3.59586e-10	0.543581	2188	3715935	NM_016518,BC008960	chr17:24345027-24418043	chr17	NC_000017.9	+	24345027	24418043	133	main	NM_016518	PIPOX	pipecolic acid oxidase
116	cg06171242	ACTTTCCAGCTCTTCCGAAGTTCGTTCTTGCGCAAAGCCCAAAGGCTGGAAAACCGTCCA[CG]ATGACCAGCATGACTCAGTCTCTGCGGGAGGTGATAAAGGCCATGACCAAGGCTCGCAAT	6	24775469	F	ACOT13;TTRAP;ACOT13;ACOT13;ACOT13	0.573873	2945645	-0.0213854	-1.00002	0.317374	0.0922723	0.492354	2188	2945645	0.0880525	4.12756	3.71688e-05	8.26534e-05	0.527288	2188	2945645	0.262717	12.5782	7.2705e-36	8.61654e-36	0.58698	2188	2945645	NM_016614,AK298699	chr6:24758144-24775240	chr6	NC_000006.10	-	24758144	24775240	102	main	NM_016614	TTRAP	TRAF and TNF receptor associated protein
117	cg06189653	CTGTGGGTTCGGCACTAGGTCCTCCTCCCCGTGGCTTCCTAGTAGGCATGTGGTGGTGTA[CG]CCTGCTGGGCACCTAGCGAGAGGGGTCGTGAGTTGGGAGGGAGCCACGTTGGGGTGCCTG	5	176805938	R	PRR7	-9.92863	2843209	0.071516	3.34943	0.000815105	0.000553928	0.522861	2188	2843209	0.0444559	2.07989	0.0375889	0.032139	0.51481	2188	2843209	0.128024	6.01874	1.85782e-09	6.06163e-10	0.542127	2188	2843209	NM_030567,BC024233	chr5:176806402-176816266	chr5	NC_000005.8	+	176806402	176816266	65	main	NM_030567	PRR7	proline rich 7 (synaptic)
118	cg06295856	CCGCAGCCGAGCAGGAAGAGCGAGCCGGGGGATTGAGACTGTCCGATCCAACCTAGGGCA[CG]AGCCTGGTATAAATCGCGGACTAACAGAGACTATCTGATGAAGAGACTAACGGAGAGAGA	11	14950218	F	CALCA;CALCA;CALCA	1.25133	3364127	0.0721621	3.37979	0.000730321	0.000504398	0.523296	2188	3364127	0.066684	3.12242	0.00180294	0.00253243	0.52145	2188	3364127	0.179513	8.48499	2.65306e-17	1.43245e-17	0.562145	2188	3364127	NM_001033952,NM_001033953,NM_001741,X02330	chr11:14944793-15014997	chr11	NC_000011.8	-	14944793	15014997	102	main	NM_001033952	CALCA	calcitonin-related polypeptide alpha
119	cg06327515	GGCTCTTTTGTGGCTAATCTAGCGAGGGACCTAGGGCTGGGGGTGGAGGAGCTGTCTTCA[CG]TGAAGCCCGGGTAGTGTCTGATGATAATAAAAAGTATTTGCACCTTGATTTGCTGACTGG	5	140583445	F	PCDHB14	5.71657	2832459	0.0210272	0.983265	0.32555	0.0943553	0.507098	2188	2832459	0.0322021	1.50612	0.132115	0.0871145	0.511348	2188	2832459	0.0411902	1.92693	0.0540504	0.00845885	0.514844	2188	2832459	NM_018934,AK074555	chr5:140582698-140587513	chr5	NC_000005.8	+	140582698	140587513	28	main	NM_018934	PCDHB14	protocadherin beta 14
120	cg06363129	AAATTGCCTGAAATTTCAGAGTTGGACTTCATCACTTGTCTGTGAGCCGACGCAGGCAGG[CG]TATTCTATATCAACGACAGACTCTCCTCTGCCATTTCCTTTCCTGAATCTAGTTAACATT	7	16472127	R	SOSTDC1	-0.0477947	3039671	0.0266418	1.24592	0.212871	0.0659315	0.509362	2188	3039671	0.0300115	1.4036	0.160518	0.101238	0.512533	2188	3039671	0.053722	2.51417	0.0119614	0.00202898	0.517258	2188	3039671	NM_015464,BC008484,AY255634	chr7:16467631-16536720	chr7	NC_000007.12	-	16467631	16536720	56	main	NM_015464	SOSTDC1	sclerostin domain containing 1
121	cg06493994	GGAGAGCAAGTCAAGAAATACGGTGAAGGAGTCCTTCCCAAAGTTGTCTAGGTCCTTCCG[CG]CCGGTGCCTGGTCTTCGTCGTCAACACCATGGACAGCTCCCGGGAACCGACTCTGGGGCG	6	25760581	R	SCGN;SCGN	23.3721	2898934	0.047189	2.20794	0.0272944	0.0113568	0.516098	2188	2898934	0.0387462	1.81247	0.0699801	0.0531221	0.512019	2188	2898934	0.0377849	1.76746	0.0772197	0.0118227	0.512706	2188	2898934	NM_006998,BC003036	chr6:25760240-25809987	chr6	NC_000006.10	+	25760240	25809987	66	main	NM_006998	SCGN	secretagogin, EF-hand calcium binding protein
123	cg06637774	AGCGCCTGGGCGAGTGACATCTGGGCCGGACCAGCTGGTGCTGCGCGGCGCAGGTAAGGG[CG]TGCGCGGGCAGGGACAGGGGTAAGGGGTGCCGGGGCGCGGGGATACAGGGAGGCCTGCCC	11	72653350	R	P2RY6;P2RY6	1.89342	3339774	0.0305578	1.42917	0.153036	0.0497947	0.510374	2188	3339774	0.0312294	1.4606	0.144205	0.0931733	0.510154	2188	3339774	0.114002	5.3534	8.94449e-08	2.51958e-08	0.538891	2188	3339774	NM_176796,NM_176798,NM_176797,NM_004154,AF007892	chr11:72653222-72687302	chr11	NC_000011.8	+	72653222	72687302	70	main	NM_176796	P2RY6	pyrimidinergic receptor P2Y, G-protein coupled, 6
124	cg06638451	TTATTCTGGTATCAATAAAAAGGAACTGTTACTATAGTAACAGATATTCCACTTGGTGCA[CG]GCCACTTCCACGATGCGGAACATCATGTCCAAGCCACACGCTTGAGAGGCACAAATAAAT	3	58538309	F	FAM107A;FAM107A;FAM107A;FAM107A	2.47969	2678448	0.0366828	1.71586	0.0862585	0.0305591	0.514858	2188	2678448	0.0324639	1.51837	0.128998	0.0856063	0.511245	2188	2678448	0.0465109	2.17617	0.0295902	0.0047808	0.514438	2188	2678448	NM_007177,NM_001076778,AF089854	chr3:58524887-58588367	chr3	NC_000003.10	-	58524887	58588367	65	main	NM_007177	FAM107A	family with sequence similarity 107, member A
125	cg06690548	GAAGCAATTTGAGGGTGTTCCAGATCACACCAACAGCGGATGCTGCATCTGGGTAGTTCA[CG]TACCCGAACAAAAATTTTAAAAATTTGGTGTGGCCTTTGCCATCCATTCACTCCTCAAAA	4	139382258	R	SLC7A11	-17.3121	2786322	0.0397267	1.85839	0.0631792	0.0234144	0.514301	2188	2786322	0.170593	8.05479	9.42839e-16	1.81307e-14	0.554779	2188	2786322	0.281074	13.505	5.19206e-41	7.47612e-41	0.595924	2188	2786322	NM_014331,AF252872	chr4:139279856-139461590	chr4	NC_000004.10	-	139279856	139461590	185	main	NM_014331	SLC7A11	solute carrier family 7, (cationic amino acid transporter, y+ system) member 11
126	cg06908778	TGAGTCAGAGGCAGGTGCTGCAAGGTAGGGCCGAGGCGGGCAGGTGCCCTAACTAGCTGG[CG]CCGAGGAGACCCGGGTGCGGTGGGCTCCACCGACTCTCTCTCCCGCAGTGTTCGAGCAAT	10	22674608	R	SPAG6;SPAG6	10.8651	3238528	0.0789636	3.69962	0.000217932	0.000177642	0.52738	2188	3238528	0.0304598	1.42458	0.154359	0.0981929	0.509682	2188	3238528	0.120642	5.66819	1.50827e-08	4.55591e-09	0.540111	2188	3238528	NM_012443,NM_172242,AF079363	chr10:22674236-22827151	chr10	NC_000010.9	+	22674236	22827151	237	main	NM_012443	SPAG6	sperm associated antigen 6
128	cg06975499	CTCGCCTGGGTCTCTCTCGCCCCGTCGCCCCCATTCCCCCACCCTCGGAATGAGGAGGGG[CG]CCTGCTACCCCCGGCCAGGCAGGCAGTGTGTCCCTCGGATTCCTTCCAATTTCCTGATCC	17	38150407	F	EZH1	-0.508782	3758078	-0.00525716	-0.245799	0.80586	0.198454	0.498452	2188	3758078	-0.00438418	-0.204982	0.837605	0.335443	0.499252	2188	3758078	0.0866707	4.06245	4.91909e-05	1.06687e-05	0.528378	2188	3758078	NM_001991,BC015882	chr17:38105820-38157423	chr17	NC_000017.9	-	38105820	38157423	144	main	NM_001991	EZH1	enhancer of zeste homolog 1 (Drosophila)
129	cg06994793	GTAAGACAGGAAATCAATCAGAGGCAGAGCGACGCCTCTGGCTCTGGTCTAGTGGTGCAG[CG]TCTCTAGCCCTCGCCCCGCCCACCGTCCCCGCGAGGCGTCCACTCGCCGAGCCCCGCCCT	5	139999095	R	TMCO6	2.26458	2831897	0.0464405	2.17287	0.029838	0.0122645	0.515211	2188	2831897	-0.0157695	-0.73736	0.460964	0.222285	0.49371	2188	2831897	0.0997657	4.68008	2.93029e-06	7.13593e-07	0.534943	2188	2831897	NM_018502,BC001910	chr5:139998889-140005555	chr5	NC_000005.8	+	139998889	140005555	125	main	NM_018502	TMCO6	transmembrane and coiled-coil domains 6
130	cg07038400	GTGGCGCAGGTGCAGGACTGTGGGAAGACAGGAGCGCCAGGGAATGTCTGGCCAGCAGCG[CG]CTGCCCTCAAGGGGCCTCCTTGAAGGCCCCTTGAAGAGGGCAACACAACTAATGACGATA	3	137166853	F	PPP2R3A	1.77874	2643901	-0.014427	-0.674578	0.500001	0.134824	0.493821	2188	2643901	0.0173262	0.810162	0.417912	0.207065	0.505985	2188	2643901	0.0209268	0.97857	0.327866	0.0454664	0.506448	2188	2643901	NM_002718,NM_181897,BC065531	chr3:137167244-137349424	chr3	NC_000003.10	+	137167244	137349424	293	main	NM_002718	PPP2R3A	protein phosphatase 2 (formerly 2A), regulatory subunit B'', alpha
132	cg07180649	TACAGCCTTCCGGGAGCTGGACGGGGCCTCCCCAGCTTTGGGCAGCTTGGGACAGTGGCC[CG]AGACTGTGGGAATCCGAAACCTCGCTTCTGGCTAGCCACAAGGTCTGGGCGCGCCCCAGG	1	22342877	R	WNT4	-4.10597	2401018	0.0530096	2.48077	0.0131417	0.00605452	0.518909	2188	2401018	0.0391707	1.83235	0.066965	0.0512814	0.511755	2188	2401018	0.10288	4.82722	1.41845e-06	3.56721e-07	0.535142	2188	2401018	NM_030761,BC057781	chr1:22318177-22359130	chr1	NC_000001.9	-	22318177	22359130	69	main	NM_030761	WNT4	wingless-type MMTV integration site family, member 4
133	cg07211259	TCCCATTCACAGACAAACTGCTAAAAGCAAAACCAAAACTTTCCAAATAAGCCAGGCTTT[CG]TCAGTTCCTCAGAACTAGTTCTGGTTTGACTCACTCTCATGTTACGGCAAACCTTAAGCT	9	5500497	R	PDCD1LG2	-2.42361	3161113	0.0886849	4.15735	3.26506e-05	3.41313e-05	0.530248	2188	3161113	0.0837119	3.9231	8.84176e-05	0.000179761	0.523896	2188	3161113	0.0722958	3.38607	0.000713835	0.000138436	0.523154	2188	3161113	NM_025239,AF344424	chr9:5500545-5561253	chr9	NC_000009.10	+	5500545	5561253	112	main	NM_025239	PDCD1LG2	programmed cell death 1 ligand 2
134	cg07236943	AACGTGCGGTTGCCGTGACTAAACGCATTCATTCACCCTACAAGATTTAGGAAAATGTAA[CG]TTGCAAGGGAAGCAAGGTCTCTGTGTAAACCTCGTAATCGCCACCAAAAGTCGGTAGCTG	7	94122422	F	SGCE;SGCE;PEG10;SGCE;PEG10	4.68448	3013255	-0.0185793	-0.868771	0.38504	0.108532	0.494677	2188	3013255	-0.00134701	-0.0629789	0.949789	0.363122	0.501615	2188	3013255	-0.049157	-2.30018	0.0214795	0.00353829	0.482003	2188	3013255	NM_015068,NM_001040152,AB049150	chr7:94123638-94150942	chr7	NC_000007.12	+	94123638	94150942	117	main	NM_015068	PEG10	paternally expressed 10
134	cg07236943	AACGTGCGGTTGCCGTGACTAAACGCATTCATTCACCCTACAAGATTTAGGAAAATGTAA[CG]TTGCAAGGGAAGCAAGGTCTCTGTGTAAACCTCGTAATCGCCACCAAAAGTCGGTAGCTG	7	94122422	F	SGCE;SGCE;PEG10;SGCE;PEG10	4.68448	3061805	-0.0133943	-0.626286	0.531181	0.141883	0.495467	2188	3061805	-0.0667457	-3.12532	0.00178532	0.0025103	0.479736	2188	3061805	-0.122201	-5.74216	9.79097e-09	3.00883e-09	0.456822	2188	3061805	NM_001099401,NM_003919,NM_001099400,AY359042	chr7:94052494-94124752	chr7	NC_000007.12	-	94052494	94124752	201	main	NM_001099401	SGCE	sarcoglycan, epsilon
135	cg07265300	CACATTTCCCGCACAAGTCCCCAAGCCTTGGACCCCCCTCATCAGGACCTCCGGCACAGG[CG]CCCGTTTCCCGCCACTGCCTTCCAGTGGTTTGGTCCCCGAGCAGGACCCAAGGCGGGGCA	2	24199504	F	PFN4;PFN4;LOC375190	28.398	2544219	0.0681445	3.19102	0.00142559	0.000896241	0.524018	2188	2544219	0.0647745	3.03276	0.00243463	0.0032876	0.522581	2188	2544219	0.0274564	1.28404	0.199208	0.0287217	0.50846	2188	2544219	NM_199346,AK292601	chr2:24191474-24200054	chr2	NC_000002.10	-	24191474	24200054	28	main	NM_199346	PFN4	profilin family, member 4
136	cg07484827	GCCCCTCCCTCTCTGCCCTTTCATTAGCTTAATTACACCGTGCCTATGACAACAGAGCAA[CG]GAAACTGATACCTCGGGCCTCTGGGGCTTGAATTATTCAAACTCTGTAAAGCAGCACACA	11	3649733	F	CHRNA10	6.5815	3359897	0.091849	4.30651	1.68519e-05	1.9085e-05	0.531134	2188	3359897	0.0791759	3.70961	0.00020953	0.000383371	0.525307	2188	3359897	0.256733	12.2781	2.84348e-34	3.17903e-34	0.583772	2188	3359897	NM_020402,AF199235	chr11:3643394-3649190	chr11	NC_000011.8	-	3643394	3649190	40	main	NM_020402	CHRNA10	cholinergic receptor, nicotinic, alpha 10
137	cg07494518	CGTGGGGCTGGCGGCGCGGATGCCCTGGGGCGCTGCAGACCCCGAGAGGCCGCTTGCCCG[CG]GGGACGTCAGCCGCTTTTGCTGTTAAAATCTGAAATGTTCAGCAAGTTAGAAACTTGAAA	21	43672036	F	SIK1	-5.79414	3934111	0.0396758	1.85601	0.0635177	0.0235191	0.513399	2188	3934111	0.000686443	0.0320944	0.9744	0.368875	0.500306	2188	3934111	0.0282699	1.3221	0.186214	0.0269614	0.508579	2188	3934111	NM_173354,AB047786	chr21:43637578-43705100	chr21	NC_000021.7	-	43637578	43705100	194	main	NM_173354	SIK1	salt-inducible kinase 1
138	cg07654934	CCGGATGAGCAGTGACTTCAGGGCTTGGGCTACTCTGGCTTAACGGGACCAGTAGCAGAG[CG]CCGCCCGTCCTGCTTGCTGCTGGGTCCGGTTGCCGAGGCGGAAAAGTCGCAAGCTCCTTC	3	159873023	R	LXN;LXN;GFM1	-7.18344	2649640	-0.0924002	-4.3325	1.49848e-05	1.7179e-05	0.470024	2188	2649640	-0.0601479	-2.8156	0.00488647	0.00596692	0.481065	2188	2649640	-0.240802	-11.4841	3.10629e-30	2.95452e-30	0.419316	2188	2649640	NM_024996,AF309777	chr3:159827258-159893051	chr3	NC_000003.10	+	159827258	159893051	207	main	NM_024996	GFM1	G elongation factor, mitochondrial 1
138	cg07654934	CCGGATGAGCAGTGACTTCAGGGCTTGGGCTACTCTGGCTTAACGGGACCAGTAGCAGAG[CG]CCGCCCGTCCTGCTTGCTGCTGGGTCCGGTTGCCGAGGCGGAAAAGTCGCAAGCTCCTTC	3	159873023	R	LXN;LXN;GFM1	-7.18344	2702724	-0.0358866	-1.67859	0.0933052	0.032645	0.487702	2188	2702724	0.00126936	0.0593488	0.95268	0.363772	0.498575	2188	2702724	0.0729344	3.41609	0.000639739	0.000124705	0.524842	2188	2702724	NM_020169,AF282626	chr3:159846311-159873176	chr3	NC_000003.10	-	159846311	159873176	80	main	NM_020169	LXN	latexin
139	cg07817698	TCGGTCAGGCGTGTGCAGACAGCGCCTGCAGGTCTGGGTGGGTGCTGATCTGAGTGTCTG[CG]CCTGGGCCATGTTTTTGAGCCTGGCACAGGGGTGCTTAGTGAACACATGACCGCCTAGCG	16	70600426	R	DHODH	12.909	3667811	-0.0553871	-2.59226	0.00956149	0.0046021	0.480163	2188	3667811	-0.0415964	-1.94595	0.0517215	0.0416055	0.487226	2188	3667811	-0.125411	-5.8946	3.95297e-09	1.25524e-09	0.460257	2188	3667811	NM_001361,BC065245	chr16:70599844-70616797	chr16	NC_000016.8	+	70599844	70616797	127	main	NM_001361	DHODH	dihydroorotate dehydrogenase
140	cg07850604	TAGTTCATCTGCTGGCCGGCTCTCAGTCCCCGTGGCGCCCCCTTTCCTCTTGTCCCAGAG[CG]CTCTCGACTCCACCATGCCAAGGGGATTCCTGGTGAAGCGAACTAAACGGACAGGCGGCT	14	35073194	F	INSM2;INSM2	21.3102	3532511	0.0697341	3.26569	0.00109853	0.000716046	0.522437	2188	3532511	0.000419483	0.0196128	0.984354	0.371261	0.50043	2188	3532511	0.154796	7.29609	3.32505e-13	1.41884e-13	0.551342	2188	3532511	NM_032594,AF260323	chr14:35072476-35078585	chr14	NC_000014.7	+	35072476	35078585	50	main	NM_032594	INSM2	insulinoma-associated 2
141	cg07929310	AGGGAAACCGAGGGCCAGGAAACAACTAGAATCCGACGGTATTTCCTAGCTCCCTGATGG[CG]CTTCCCATGCCCCCAACTAAATCATGAAATAACCCACTCACCTGTTTGCACCGGGCCTGC	16	83618562	R	KIAA0513	-9.26777	3672059	0.120257	5.64991	1.67681e-08	3.9273e-08	0.542702	2188	3672059	0.0640239	2.99752	0.00273412	0.00362921	0.520243	2188	3672059	0.286882	13.8004	1.00763e-42	1.57055e-42	0.598434	2188	3672059	NM_014732,AB011085	chr16:83618878-83685327	chr16	NC_000016.8	+	83618878	83685327	129	main	NM_014732	KIAA0513	KIAA0513
142	cg08035942	CCTTTAATCTTTTTGTTTTGGTTTGAATCTGCTCGGCGCAGACTGGCCAAGGATCCTCTC[CG]CCCTCCCCCTTCCTCCTGGCGCGGGAGAGGCACCGGATATCCCCACCCTCCCCGAGCTCT	18	71050325	R	TSHZ1;ZADH2	-6.58988	3794056	-0.0119034	-0.556565	0.577872	0.152004	0.4967	2188	3794056	-0.0999042	-4.68662	2.8385e-06	8.20758e-06	0.467532	2188	3794056	-0.226351	-10.7695	8.09293e-27	6.70532e-27	0.427705	2188	3794056	NM_005786,AB210042	chr18:71051750-71247703	chr18	NC_000018.8	+	71051750	71247703	197	main	NM_005786	TSHZ1	teashirt zinc finger homeobox 1
142	cg08035942	CCTTTAATCTTTTTGTTTTGGTTTGAATCTGCTCGGCGCAGACTGGCCAAGGATCCTCTC[CG]CCCTCCCCCTTCCTCCTGGCGCGGGAGAGGCACCGGATATCCCCACCCTCCCCGAGCTCT	18	71050325	R	TSHZ1;ZADH2	-6.58988	3813604	-0.0157028	-0.734238	0.462864	0.126391	0.495021	2188	3813604	-0.0625463	-2.92816	0.00342398	0.00440297	0.480579	2188	3813604	-0.188019	-8.8966	7.38291e-19	4.338e-19	0.436143	2188	3813604	NM_175907,BC078661	chr18:71011922-71050271	chr18	NC_000018.8	-	71011922	71050271	117	main	NM_175907	ZADH2	zinc binding alcohol dehydrogenase domain containing 2
143	cg08067365	TGTGCCTCAGGCTTATAATAGGGCCGGTGCTGCCTGCCGAAGCCGGCGGCTGAGAGGCAG[CG]AACTCATCTTTGCCAGTACAGGAGCTTGTGCCGTGGCCCACAGCCCACAGCCCACAGCCA	1	938756	F	ISG15;ISG15	-11.5198	4053534	0.00245684	0.114869	0.908559	0.218164	0.503543	2188	4053534	0.0743165	3.48106	0.00050318	0.000832582	0.525772	2188	4053534	0.0903634	4.23647	2.30504e-05	5.17955e-06	0.533528	2188	4053534	NM_005101,M13755	chr1:923383-939777	chr1	NC_000001.9	+	923383	939777	53	main	NM_005101	ISG15	ISG15 ubiquitin-like modifier
144	cg08074477	CAGACCTGCCTTAAAAGCAGCTTGCCCGCCTTCTCTCCTCCCCTCCGGGCGGGCCCTGCA[CG]TGGCCCTGACAGCAGTAGGCCCCACCCCTGCTGGATCCAGTGAGCTCAGGTGGGGCTGGC	17	35911475	F	TNS4	1.90273	3756262	0.0450381	2.10717	0.0351549	0.0141248	0.514623	2188	3756262	0.0285306	1.3343	0.182185	0.111599	0.51045	2188	3756262	0.0518837	2.42798	0.0152175	0.00254969	0.516697	2188	3756262	NM_032865,AF417488	chr17:35881491-35911365	chr17	NC_000017.9	-	35881491	35911365	144	main	NM_032865	TNS4	tensin 4
145	cg08169325	AATGTGCTGGGTGCAGCTTTGGGTAATACATATGCCGAACCTTCTCTTTAAGGGTCCACG[CG]CAGCCTCGGGTGTGAATGAAGGAGAAGAGATCGTGTACCACACATGATGCTTACGGAGCA	12	129890076	R	STX2;STX2	-6.32278	3478457	-0.0699607	-3.27634	0.001058	0.000694568	0.475233	2188	3478457	-0.0546039	-2.55553	0.010631	0.0114246	0.481149	2188	3478457	-0.251015	-11.9924	8.6424e-33	9.14867e-33	0.416026	2188	3478457	NM_194356,NM_001980,BC047496	chr12:129840099-129889764	chr12	NC_000012.10	-	129840099	129889764	95	main	NM_194356	STX2	syntaxin 2
146	cg08212685	GCGCGGCAGTGGCCTCGCAGGGCGCTGGGTCCCTCTCCCCAGCTCTCCTCCCCCTGGCCC[CG]TCGCCCCGCCCTCGCCGGGCTGGGCTGCGGGGTCAGGGGCCGAGCGGAGAGGGGTGAGTA	5	81303827	R	ATG10;ATG10;ATG10;ATG10	0.0129441	2818212	-0.0358795	-1.67825	0.0933701	0.0326595	0.486833	2188	2818212	0.00102168	0.0477682	0.961905	0.366201	0.499289	2188	2818212	-0.0627715	-2.93872	0.00330954	0.000599895	0.478835	2188	2818212	NM_031482,NM_001131028,BC029268	chr5:81303610-81609408	chr5	NC_000005.8	+	81303610	81609408	227	main	NM_031482	ATG10	ATG10 autophagy related 10 homolog (S. cerevisiae)
147	cg08251399	GTGAGTGAGGGGCTCAAGAAACTCTACAAGAGCAAGCTGCTGCCCTTGGAAGAGCATTAC[CG]CTTCCACGAGTTCCACTCGCCCGCCCTGGAGGATGCCGACTTCGACAACAAGCCCATGGT	2	31311112	R	EHD3	0.755044	2475911	0.00575481	0.269067	0.787902	0.195027	0.502105	2188	2475911	-0.0178977	-0.836889	0.402721	0.20139	0.495419	2188	2475911	0.0491333	2.29906	0.0215425	0.00354764	0.516728	2188	2475911	NM_014600,AF214736	chr2:31310470-31345014	chr2	NC_000002.10	+	31310470	31345014	79	main	NM_014600	EHD3	EH-domain containing 3
148	cg08331960	TCGGGGTCCCTTGGCCTGGAGACCCTTTGTCCAACCCGTCGCCCACCTCAAGACCTGCCT[CG]ATGCTGCGCATACAGTAGGTATCCAATAAATGTTCCTGGGATAGAAGGCAAAGGCGCTGG	16	2016598	F	SLC9A3R2;SLC9A3R2	-20.7074	3644340	0.106389	4.99307	6.10808e-07	1.00573e-06	0.534977	2188	3644340	0.0547852	2.56403	0.0103744	0.0112063	0.516966	2188	3644340	0.163259	7.70207	1.54343e-14	7.15849e-15	0.553157	2188	3644340	NM_001130012,NM_004785,AF004900	chr16:2015501-2029028	chr16	NC_000016.8	+	2015501	2029028	129	main	NM_001130012	SLC9A3R2	solute carrier family 9 (sodium/hydrogen exchanger), member 3 regulator 2
149	cg08424423	AGCCAGCAGCAGTGCCATCATCCCGTGCCCACCCACACGCCCCATCCAGGGTGCCCGAGA[CG]AGCCCATCTCGGACTGCACGGCCTCCTGACTGATGGCAGCTCAAGGACACCCGGGTCCTT	6	31196167	F	CDSN;PSORS1C1	-1.15684	2902155	0.0379979	1.77744	0.075565	0.0272491	0.512397	2188	2902155	0.0331564	1.55079	0.121029	0.0816167	0.510145	2188	2902155	0.0953423	4.47128	7.91877e-06	1.85703e-06	0.531389	2188	2902155	NM_014068,AB031479	chr6:31190516-31215848	chr6	NC_000006.10	+	31190516	31215848	45	main	NM_014068	PSORS1C1	psoriasis susceptibility 1 candidate 1
149	cg08424423	AGCCAGCAGCAGTGCCATCATCCCGTGCCCACCCACACGCCCCATCCAGGGTGCCCGAGA[CG]AGCCCATCTCGGACTGCACGGCCTCCTGACTGATGGCAGCTCAAGGACACCCGGGTCCTT	6	31196167	F	CDSN;PSORS1C1	-1.15684	2948790	0.0464149	2.17168	0.0299283	0.0122968	0.515594	2188	2948790	0.0539379	2.5243	0.0116226	0.0123032	0.515678	2188	2948790	0.0934063	4.37995	1.20737e-05	2.78772e-06	0.53306	2188	2948790	NM_001264,L20815	chr6:31190848-31201297	chr6	NC_000006.10	-	31190848	31201297	51	main	NM_001264	CDSN	corneodesmosin
150	cg08475827	CCACTATGTTCAGTCTAGTGAGTCTGAGCAATTAACTCACATTTTGAATTTCAAGTCTCT[CG]CCTTAGGCAAAACACCACCACCTGATGCTCACCAGAGGGGCGTGACGCGGCAGCTGGGCA	2	151974476	R	RIF1	3.70275	2510485	-0.086298	-4.04489	5.30166e-05	5.19166e-05	0.469564	2188	2510485	-0.0386589	-1.80839	0.0706134	0.053506	0.486803	2188	2510485	-0.0785951	-3.68228	0.000233271	4.75154e-05	0.473399	2188	2510485	NM_018151,AY585745	chr2:151974674-152072768	chr2	NC_000002.10	+	151974674	152072768	343	main	NM_018151	RIF1	RAP1 interacting factor homolog (yeast)
151	cg08487374	TGGGCAGTGGCGGGGCACGCAGGCGGCGATCAGAGGCTGTCCCGTCCTCTCCGGGGGCCG[CG]GCTCATCCTGCCAGGCATCTCCGAGGAAAGTTTGCTCTCCGGAAAAGAAGAAACCCGCGC	7	99914498	F	TSC22D4;TSC22D4	11.6734	3064039	0.0897671	4.20836	2.61033e-05	2.79626e-05	0.530878	2188	3064039	0.059774	2.79805	0.00515965	0.0062516	0.518503	2188	3064039	0.235475	11.2201	6.00259e-29	5.438e-29	0.580371	2188	3064039	NM_030935,BC001486	chr7:99902095-99914927	chr7	NC_000007.12	-	99902095	99914927	104	main	NM_030935	TSC22D4	TSC22 domain family, member 4
152	cg08529529	AAACATGGATCAAGAAACTGTAGGCAATGTTGTCCTGTTGGCCATCGTCACCCTCATCAG[CG]TGGTCCAGAATGGTAAGGAAAGCCCTTCACTCAGGGAAGAACAGAAGGGGAGATTTTCTT	13	30207799	R	ALOX5AP	-10.227	3484060	0.215276	10.2251	2.34602e-24	1.0151e-22	0.57296	2188	3484060	0.186772	8.83618	1.26175e-18	3.81436e-17	0.560212	2188	3484060	0.46431	23.5079	2.01309e-117	3.97351e-116	0.659873	2188	3484060	NM_001629,BC018538	chr13:30169307-30283004	chr13	NC_000013.9	+	30169307	30283004	184	main	NM_001629	ALOX5AP	arachidonate 5-lipoxygenase-activating protein
153	cg08586737	AGCGACAGAGCAACGTCGCACTGCATTCTTACCAAACACCCAGGTGAACGACGCATCCAA[CG]ATTTGGGAGCTCAGGACCCATGGTCCCTAAAAGGCAACAATTAAGACTCCCATTTAGACC	7	127013185	F	GCC1	2.69622	3071285	0.0328238	1.53522	0.124807	0.0418926	0.512818	2188	3071285	0.0382045	1.78711	0.0739882	0.0554806	0.513849	2188	3071285	0.130285	6.12627	9.54498e-10	3.19949e-10	0.544807	2188	3071285	NM_024523,BC014100	chr7:127007919-127021732	chr7	NC_000007.12	-	127007919	127021732	59	main	NM_024523	GCC1	GRIP and coiled-coil domain containing 1
154	cg08587542	GAAGAGAGGAGAGGTTTAGAGTCAAAGAGCCCCAAACATTAGTGAGAGTATATGTATGAA[CG]TTTGGTCATCTTAGAACAGTGGTTGGCATCCACAGGAGACCAGCAGAATCACATGGGCGC	5	141284084	F	KIAA0141;KIAA0141	-3.06398	2832963	0.0291416	1.36289	0.172997	0.0552596	0.509244	2188	2832963	0.007712	0.360579	0.718446	0.303212	0.502966	2188	2832963	-0.0260183	-1.21675	0.223778	0.0319662	0.490362	2188	2832963	BC007855,BC011926,AK292869,AK093504	chr5:141258489-141304486	chr5	NC_000005.8	+	141258489	141304486	188	main	BC007855	KIAA0141	KIAA0141
155	cg08654655	GGGGATCCCCAGTTGCCAAAGGATGGAGGGCGGAGCTGGAGGACCTCAGGCTAGTGAGCA[CG]CCCTTGCCCAGGCCTGCAGTGGCTGCACTCGCCAGCTGGCCCATGGCCCTGTCCGACTCC	1	157407687	F	CADM3;CADM3	1.97371	2362469	0.0915384	4.29186	1.79993e-05	2.02315e-05	0.530234	2188	2362469	0.0752291	3.52397	0.000428465	0.000722676	0.523662	2188	2362469	0.17181	8.1134	5.85718e-16	2.94301e-16	0.558927	2188	2362469	NM_021189,NM_001127173,AF363367	chr1:157407649-157439977	chr1	NC_000001.9	+	157407649	157439977	155	main	NM_021189	CADM3	cell adhesion molecule 3
156	cg08668790	TCTTTTTGTGACTCTCAAGGAAAGTCGGTTTTCTGAGCTCTTACTGGCTTAGTAGCGTGG[CG]TTCAACGCAGAGCATTCTAGGTAATGTAGTTTTCATAGATCCCGAGGTGGGTGCCGGGGA	19	62912474	F	ZNF154	4.11211	3872380	-0.213393	-10.1328	5.96678e-24	2.5043e-22	0.426929	2188	3872380	-0.110517	-5.18836	2.18981e-07	8.11786e-07	0.466968	2188	3872380	-0.200859	-9.52052	2.38134e-21	1.5576e-21	0.432991	2188	3872380	NM_001085384,BC152561	chr19:62900451-62912370	chr19	NC_000019.8	-	62900451	62912370	56	main	NM_001085384	ZNF154	zinc finger protein 154
157	cg08694544	GAGAAGGGAGGCAGCTGCGGCAAAGTTAGAGCAAGTACTGCAGCAGCCAGGTTGGGTCCG[CG]CCGTCGGGTTTCTGAGAAAAGGGAGGAAAGAGGCGGGGCCTGCACGGTGTGTCCCCGCCC	19	12807228	R	RTBDN;RTBDN	2.48153	3851801	0.0715997	3.35336	0.000803638	0.000547109	0.523283	2188	3851801	0.0311656	1.45761	0.145027	0.0936056	0.510288	2188	3851801	0.117238	5.50673	3.80316e-08	1.11001e-08	0.539645	2188	3851801	NM_031429,NM_001080997,AK093672	chr19:12797298-12807307	chr19	NC_000019.8	-	12797298	12807307	65	main	NM_031429	RTBDN	retbindin
158	cg08872493	TTCCTATCCCACTGATCGTTTTAGAGCCTGAACAGACAAAACATCCTGGTTACCAAGACT[CG]AAGAATGCATAAGCTGGGACCAGGCAAAACAAACAGATCACTGTGGGCTCACAGAGCAGG	1	23394004	F	HTR1D	1.54823	2401251	0.0659148	3.0863	0.00203669	0.00122099	0.521635	2188	2401251	0.0656043	3.07172	0.00213869	0.00293703	0.521246	2188	2401251	0.119238	5.60161	2.21528e-08	6.5898e-09	0.538425	2188	2401251	NM_000864,BC007720	chr1:23390979-23418334	chr1	NC_000001.9	-	23390979	23418334	28	main	NM_000864	HTR1D	5-hydroxytryptamine (serotonin) receptor 1D
159	cg08896629	GGGCAACGCGGCCGGATCCTGGAGTTCCCCTCCGTGCTGTGGAATTGGGTCAGGCGTGTA[CG]GTCCTGACCCTAGGACACAGCTGCATGTCCTCACCTCGGTGTTCAAAGCTGCACCGGCCA	19	10352577	F	TYK2	-16.3038	3850278	0.141162	6.64434	3.30159e-11	1.3997e-10	0.547993	2188	3850278	0.0482133	2.25594	0.0241177	0.0224431	0.515285	2188	3850278	0.249349	11.9093	2.29809e-32	2.39408e-32	0.58479	2188	3850278	NM_003331,BC014243	chr19:10321554-10352302	chr19	NC_000019.8	-	10321554	10352302	194	main	NM_003331	TYK2	tyrosine kinase 2
160	cg08899632	GGGCGAGGCGTGAGAACGAGCATTTCTAAGTTCCCAGGTGATGCCCCTAGTGTTGGTCGG[CG]TCCACACTCTGAGGACAGTGACCTCTCTGCTCTGTCCCTCATGTCTTACTACTACTGTCT	20	50242407	R	ZFP64;ZFP64;ZFP64;ZFP64	11.0838	3909843	-0.0374336	-1.75101	0.0800134	0.0286269	0.488635	2188	3909843	-0.00442087	-0.206698	0.836265	0.335146	0.500874	2188	3909843	-0.124524	-5.85247	5.0904e-09	1.60387e-09	0.458175	2188	3909843	NM_199427,NM_018197,NM_199426,NM_022088,BC012759	chr20:50133453-50241932	chr20	NC_000020.9	-	50133453	50241932	174	main	NM_199427	ZFP64	zinc finger protein 64 homolog (mouse)
161	cg08900043	AATCATCAAGGCCATTTTCAAATCCCATTGGTCTAGCCGTCACATGGTGAGAACCGAATG[CG]CGGATAATTACGGAGCTGATATTTCCCCCCCTCCCCTTCTTTTTCCTCCCTCCCCTCCAA	12	52665163	R	HOXC10	2.53683	3416290	0.00361708	0.169116	0.865721	0.210106	0.501152	2188	3416290	-0.0319902	-1.4962	0.134679	0.0883108	0.489542	2188	3416290	0.0268748	1.25682	0.208897	0.0300008	0.509386	2188	3416290	NM_017409,BC001293	chr12:52665221-52670322	chr12	NC_000012.10	+	52665221	52670322	37	main	NM_017409	HOXC10	homeobox C10
162	cg09045681	ACCGCATACAGCACAACTCAAGTTTGCATCAGACTGGGAAGCGAACTTAAGCCAGCGGTG[CG]TGGCCCAGGAGTGGGAAAGGAAATGGATGCCTGAAGTGGAAGAGGTGGTGCAGAGGGGGC	6	31235157	R	TCF19;TCF19;CCHCR1	0.117061	2902178	-0.00988219	-0.462054	0.644084	0.165946	0.497827	2188	2902178	-0.0750672	-3.51636	0.000440914	0.000740879	0.477036	2188	2902178	-0.119594	-5.61847	2.01051e-08	6.00711e-09	0.460664	2188	2902178	NM_007109,NM_001077511,BC033086	chr6:31234104-31242895	chr6	NC_000006.10	+	31234104	31242895	92	main	NM_007109	TCF19	transcription factor 19 (SC1)
162	cg09045681	ACCGCATACAGCACAACTCAAGTTTGCATCAGACTGGGAAGCGAACTTAAGCCAGCGGTG[CG]TGGCCCAGGAGTGGGAAAGGAAATGGATGCCTGAAGTGGAAGAGGTGGTGCAGAGGGGGC	6	31235157	R	TCF19;TCF19;CCHCR1	0.117061	2948821	0.0648695	3.03722	0.00239896	0.00140153	0.522063	2188	2948821	0.0415469	1.94363	0.0520006	0.0418049	0.514021	2188	2948821	0.109275	5.12961	2.99294e-07	8.0052e-08	0.536737	2188	2948821	NM_001105564,NM_019052,NM_001105563,AB112475	chr6:31218201-31233973	chr6	NC_000006.10	-	31218201	31233973	116	main	NM_001105564	CCHCR1	coiled-coil alpha-helical rod protein 1
163	cg09096950	TTTTATCTGCCCTCGGTACGCTGATTTCCAAAACCCAGCCTCATATTCTATACTCCAAAG[CG]CACTGCCAGGTGGGCCAACTCCAGCCCCCACAATCCGATGCCAAGGCCACTTCTTGCCAC	11	117735305	F	UBE4A	0.684631	3351315	0.0137374	0.642326	0.520716	0.139558	0.504474	2188	3351315	0.0172546	0.806811	0.41984	0.207683	0.505719	2188	3351315	0.051928	2.43006	0.0151305	0.00253531	0.515902	2188	3351315	NM_004788,BC112367	chr11:117735474-117775132	chr11	NC_000011.8	+	117735474	117775132	166	main	NM_004788	UBE4A	ubiquitination factor E4A (UFD2 homolog, yeast)
164	cg09196959	GTTTATAGTGGTCTGGCTTTTGGCCATGACAATGACACCTTGCCCTTTTAATTTGGGGCC[CG]TGCAAATATTCACTGAAAGCTGTCAAGAGGAAAACAGAATTGGTTATTGAATCACTTGCT	6	30212419	R	TRIM40	0.260323	2901393	0.0426759	1.99651	0.0459361	0.0177726	0.513656	2188	2901393	0.100045	4.69325	2.74831e-06	7.97773e-06	0.533174	2188	2901393	0.182395	8.6243	8.03787e-18	4.47414e-18	0.560406	2188	2901393	NM_138700,BC060785	chr6:30211874-30224481	chr6	NC_000006.10	+	30211874	30224481	50	main	NM_138700	TRIM40	tripartite motif-containing 40
200	cg11459714	TGGGGTTGGAGCTGGGCTGTGGCACTGGACTGCGTTCGGGGACGGGGGACGCAGCCAGAA[CG]CGAGGGTGGTAGGGAAATATTGGGGGTTTCGCGTGCACCGAAGGGAATGGGAGGAGAAGA	19	56212470	R	KLK10;KLK10;KLK10	-4.21298	3868828	0.0778919	3.6492	0.000265384	0.000210794	0.526394	2188	3868828	0.0269464	1.26017	0.207686	0.123032	0.510276	2188	3868828	0.0793592	3.71823	0.000202522	4.15137e-05	0.524865	2188	3868828	NM_002776,NM_001077500,NM_145888,BC002710	chr19:56207817-56215223	chr19	NC_000019.8	-	56207817	56215223	45	main	NM_002776	KLK10	kallikrein-related peptidase 10
166	cg09294589	AAGTGCGGCCCTTGGGCCCGCAGCATTAGCCTCATCAGGGTGCTGGTTAAACACACAAAT[CG]TCAGACCTCCACCCCAGACTTTCTGAATCAGAAACTCTGGGGGCACAGCCCAGGAATCTT	3	33130137	R	CRTAP	-0.1578	2616166	0.0598445	2.80136	0.00510706	0.00268831	0.518992	2188	2616166	0.0427651	2.00069	0.0454835	0.0375185	0.514059	2188	2616166	-0.0583148	-2.72958	0.00636234	0.00111677	0.48271	2188	2616166	NM_006371,BC008745	chr3:33130489-33164268	chr3	NC_000003.10	+	33130489	33164268	115	main	NM_006371	CRTAP	cartilage associated protein
167	cg09304040	CAGGGAAACGCGGGAAGCAGGGGCGGGGCCTCTGGTGGCGGTCGGGAACTCGGTGGGAGG[CG]GCAACATTGTTTCAAGTTGGCCAAATTGACAAGAGCGAGAGGTATACTGCGTTCCATCCC	12	54646874	F	CDK2;CDK2;CDK2;SILV;CDK2	3.54841	3417146	-0.0449253	-2.10188	0.0356157	0.0142813	0.485661	2188	3417146	-0.082168	-3.85042	0.00011918	0.0002336	0.474624	2188	3417146	-0.168356	-7.9471	2.24177e-15	1.09196e-15	0.444424	2188	3417146	NM_001798,NM_052827,BC003065	chr12:54646826-54652831	chr12	NC_000012.10	+	54646826	54652831	55	main	NM_001798	CDK2	cyclin-dependent kinase 2
167	cg09304040	CAGGGAAACGCGGGAAGCAGGGGCGGGGCCTCTGGTGGCGGTCGGGAACTCGGTGGGAGG[CG]GCAACATTGTTTCAAGTTGGCCAAATTGACAAGAGCGAGAGGTATACTGCGTTCCATCCC	12	54646874	F	CDK2;CDK2;CDK2;SILV;CDK2	3.54841	3457336	-0.0573517	-2.68441	0.00728856	0.00364304	0.481952	2188	3457336	-0.0787209	-3.6882	0.000227921	0.000412967	0.476666	2188	3457336	-0.0582995	-2.72887	0.0063762	0.00111902	0.482061	2188	3457336	NM_006928,AK092881	chr12:54634159-54646753	chr12	NC_000012.10	-	54634159	54646753	104	main	NM_006928	SILV	silver homolog (mouse)
168	cg09322949	ATTTCCATGATAAAGTATCGTTTCCCTGGTAACAATAGCATTGGTCTTGAGAAGCTTCTC[CG]ATTGCAGCAGGACCTTTAAGCTGAGAACTGAAAAACGAATGGGAAGTGTTATGAGCAGAA	6	41998021	R	BYSL;MED20	3.78416	2906990	0.0469953	2.19887	0.0279339	0.0115874	0.515484	2188	2906990	0.0284093	1.32862	0.184051	0.112455	0.508133	2188	2906990	0.0981822	4.60531	4.20325e-06	1.00926e-06	0.531035	2188	2906990	NM_004053,BC050645	chr6:41996953-42010351	chr6	NC_000006.10	+	41996953	42010351	48	main	NM_004053	BYSL	bystin-like
168	cg09322949	ATTTCCATGATAAAGTATCGTTTCCCTGGTAACAATAGCATTGGTCTTGAGAAGCTTCTC[CG]ATTGCAGCAGGACCTTTAAGCTGAGAACTGAAAAACGAATGGGAAGTGTTATGAGCAGAA	6	41998021	R	BYSL;MED20	3.78416	2953852	0.0718546	3.36534	0.0007696	0.000527703	0.524092	2188	2953852	0.0429248	2.00817	0.0446826	0.0369851	0.514213	2188	2953852	0.0730125	3.41976	0.000631184	0.000123147	0.523827	2188	2953852	NM_004275,AK097385	chr6:41980852-41997048	chr6	NC_000006.10	-	41980852	41997048	50	main	NM_004275	MED20	mediator complex subunit 20
169	cg09404633	TCCTCGGGAGACAGGGTCTCCAGCAGGCTGTCGATGTCGGGGTCTTCACTCACCTGCCGG[CG]ATATTTGGCTACTCTAGACATCTTGGCAAAATGGGCTGTGGCTGCCAGGGGCTATCAGAG	1	200182069	F	LMOD1	-0.48176	2451043	0.00253983	0.118749	0.905485	0.217688	0.502678	2188	2451043	0.0228513	1.06859	0.28533	0.156235	0.505255	2188	2451043	0.0786149	3.68322	0.000232418	4.73503e-05	0.526303	2188	2451043	NM_012134,BC080187	chr1:200131069-200182318	chr1	NC_000001.9	-	200131069	200182318	179	main	NM_012134	LMOD1	leiomodin 1 (smooth muscle)
170	cg09413557	CGGGATGGGGGAGCCCAGCAGTGCCCACTGCACGCCTGGTGACGAGTCTCCCCTCATCTG[CG]CAGCTCAGTTTGCTCAGTTTGCTCTTCGTGACACGTGACTCGGCAAGGGGAGCAGGAGGA	1	151775337	F	S100A6;S100A6	-3.40305	2436067	0.0280465	1.31165	0.189718	0.0598424	0.509698	2188	2436067	0.0212371	0.993083	0.320743	0.170514	0.507204	2188	2436067	0.0718498	3.36511	0.000770235	0.000148921	0.523321	2188	2436067	NM_014624,BC009017	chr1:151773739-151775848	chr1	NC_000001.9	-	151773739	151775848	37	main	NM_014624	S100A6	S100 calcium binding protein A6
171	cg09434995	AAAAAAAAGAAAAGAAAATACTTGATGGAAGGCTGCCATCACCATGCTGCAAAATCTCCA[CG]CCCCTGCTGCCCGCACCTGTCCTTCCTCCCTCCCTCCTCCCCTGGCCTGGGGAAGCCCCT	7	75878323	R	ZP3;SRCRB4D	0.0440779	3009441	0.0892262	4.18287	2.92015e-05	3.08795e-05	0.532743	2188	3009441	0.0575989	2.696	0.00703993	0.00809432	0.517607	2188	3009441	0.178495	8.43584	4.02508e-17	2.15291e-17	0.5594	2188	3009441	NM_001110354,NM_007155,BC113949	chr7:75864803-75929759	chr7	NC_000007.12	+	75864803	75929759	83	main	NM_001110354	ZP3	zona pellucida glycoprotein 3 (sperm receptor)
171	cg09434995	AAAAAAAAGAAAAGAAAATACTTGATGGAAGGCTGCCATCACCATGCTGCAAAATCTCCA[CG]CCCCTGCTGCCCGCACCTGTCCTTCCTCCCTCCCTCCTCCCCTGGCCTGGGGAAGCCCCT	7	75878323	R	ZP3;SRCRB4D	0.0440779	3057668	0.0723969	3.39083	0.000701593	0.000486878	0.523989	2188	3057668	0.0667688	3.1264	0.00177875	0.00250264	0.522768	2188	3057668	0.152511	7.18668	7.40242e-13	3.08666e-13	0.551107	2188	3057668	NM_080744,BC113840	chr7:75856590-75876948	chr7	NC_000007.12	-	75856590	75876948	94	main	NM_080744	SRCRB4D	scavenger receptor cysteine rich domain containing, group B (4 domains)
172	cg09480837	GAGGGAACACATATAGAAGGGATTAAGGGGTAGTTGATGACTCTTTGGGAAAAGAGGGTA[CG]GGAGAAGCAAGGGGAAGAAAGACATCTATTTGTCAAAGAGCAAAGGCAAGGCAAAGCTGG	10	95779491	F	PLCE1	-7.74183	3258477	0.0166192	0.777098	0.437164	0.120584	0.506931	2188	3258477	-0.0111414	-0.520935	0.602457	0.269333	0.495822	2188	3258477	0.00109017	0.0509707	0.959354	0.120381	0.499767	2188	3258477	NM_016341,BC151854	chr10:95293987-96078702	chr10	NC_000010.9	+	95293987	96078702	537	main	NM_016341	PLCE1	phospholipase C, epsilon 1
173	cg09548179	GAGCCGCTCGCTCCCGACACGGCTCACGATGCGCGGCGAGCAGGGCGCGGCGGGGGCCCG[CG]TGCTCCAGTTCACTAACTGCCGGATCCTGCGCGGAGGGAAACTGCTCAGGTGGGCGCGGG	16	2510493	F	AMDHD2;AMDHD2	-19.0323	3644932	0.109874	5.15797	2.57498e-07	4.65033e-07	0.536186	2188	3644932	0.00287318	0.134335	0.89315	0.349757	0.50073	2188	3644932	0.137847	6.48627	9.47031e-11	3.43293e-11	0.546994	2188	3644932	NM_015944,AB209351	chr16:2510349-2521411	chr16	NC_000016.8	+	2510349	2521411	135	main	NM_015944	AMDHD2	amidohydrolase domain containing 2
174	cg09556292	GGAAGCCCGGAGCCGCCCCTCCCCGCTCCCCCGCCCCGCCGCCCCGGACGGACGGGCGCG[CG]GAGCCAACCCCGCTGCCGCTGGCTGTCCAAATCCCACCAGAGCCAATGGGAGCGCGAGGG	14	102128568	F	RCOR1	-18.6194	3553228	0.073717	3.45288	0.000558691	0.000400695	0.525384	2188	3553228	0.0931384	4.36731	1.27913e-05	3.18181e-05	0.530693	2188	3553228	0.2949	14.2099	3.7369e-45	6.3625e-45	0.601325	2188	3553228	NM_015156,AF155595	chr14:102053947-102266629	chr14	NC_000014.7	+	102053947	102266629	268	main	NM_015156	RCOR1	REST corepressor 1
175	cg09630437	GGAACGGTTCCGGCAGGGTTGGGTTTCCAGAGCTGTCCAGGGGCGCCTGGTGCTGAATCC[CG]CTTGGAAAGAGGCTTGGAGGTGGATGGGAAGGGATTTCCAACGGAGGCGGCTCCTCTCTC	19	2691301	R	SLC39A3;SLC39A3	0.165361	3845998	0.069141	3.23783	0.00121145	0.000779363	0.523477	2188	3845998	-0.00183468	-0.0857798	0.931649	0.358433	0.498933	2188	3845998	0.0622739	2.91537	0.00356727	0.00064368	0.520851	2188	3845998	NM_213568,NM_144564,BC020571	chr19:2678751-2691130	chr19	NC_000019.8	-	2678751	2691130	45	main	NM_213568	SLC39A3	solute carrier family 39 (zinc transporter), member 3
176	cg09799873	CGCCTCTCTGGACCTCTTTTTTCATCTGTAGCTTGGGGATAACACTGACTAACATGGCCA[CG]CTGAGCACTGCAAATCTAGCCTGATTGCCAGTCAGAATGCACGCCCGGCCTCGCTGTTTC	19	8291500	R	NDUFA7;RPS28	-0.750651	3848885	0.0449577	2.1034	0.0354827	0.0142374	0.51665	2188	3848885	-0.0361501	-1.69092	0.0909233	0.0652279	0.488138	2188	3848885	-0.0136742	-0.639375	0.522633	0.0696728	0.49682	2188	3848885	NM_005001,AF050637	chr19:8279482-8292294	chr19	NC_000019.8	-	8279482	8292294	51	main	NM_005001	NDUFA7	NADH dehydrogenase (ubiquinone) 1 alpha subcomplex, 7, 14.5kDa
[truncated: 350 more rows]
