# Supplementary material for: An epigenetic biomarker of aging for lifespan and healthspan
Source: Aging (Albany NY). 2018 Apr 17;10(4):573–91. doi: 10.18632/aging.101414 (PMC5940111; doi:10.18632/aging.101414)
Supplement: Supplement 4 [file aging-10-101414-s004.xlsx]

## Sheet: NEGLiu.adjArraySexRaceSite
GO.ID	Term	Annotated	Significant	Expected	Rank in ks_weight01	p.fisher_weight01	p.ks_weight01
GO:0019083	viral transcription	618	109	35.52	1	< 1e-30	< 1e-30
GO:0006614	SRP-dependent cotranslational protein targeting to membrane	488	100	28.05	2	2.7e-29	< 1e-30
GO:0006413	translational initiation	682	122	39.2	3	4.7e-29	< 1e-30
GO:0000184	nuclear-transcribed mRNA catabolic process, nonsense-mediated decay	533	103	30.64	4	5.9e-28	< 1e-30
GO:0006364	rRNA processing	753	125	43.28	5	2.2e-22	< 1e-30
GO:0002181	cytoplasmic translation	186	40	10.69	6	3.7e-12	2.4e-16
GO:0000470	maturation of LSU-rRNA	103	20	5.92	7	3e-07	1.3e-15
GO:0001731	formation of translation preinitiation complex	48	14	2.76	13	3.1e-07	5.5e-07
GO:0006446	regulation of translational initiation	151	20	8.68	25	3.1e-06	0.00016
GO:0000027	ribosomal large subunit assembly	82	17	4.71	10	3.4e-06	5.1e-10
GO:0006414	translational elongation	226	37	12.99	12	5e-06	1.7e-08
GO:0042776	mitochondrial ATP synthesis coupled proton transport	38	11	2.18	11	6.2e-06	7.6e-09
GO:0006283	transcription-coupled nucleotide-excision repair	135	22	7.76	21	9e-06	0.00011
GO:0075713	establishment of integrated proviral latency	22	8	1.26	34	1.8e-05	0.00068
GO:0070125	mitochondrial translational elongation	119	19	6.84	8	4.8e-05	5.6e-12
GO:0000028	ribosomal small subunit assembly	55	12	3.16	14	5.4e-05	8.6e-07
GO:0070126	mitochondrial translational termination	125	19	7.18	9	9.6e-05	8.6e-12
GO:0048007	antigen processing and presentation, exogenous lipid antigen via MHC class Ib	10	5	0.57	177	0.00012	0.01783
GO:1904714	regulation of chaperone-mediated autophagy	28	8	1.61	40	0.00013	0.0012
GO:0071941	nitrogen cycle metabolic process	29	6	1.67	35	0.00015	0.00079
GO:0006296	nucleotide-excision repair, DNA incision, 5'-to lesion	73	13	4.2	58	0.00024	0.00238
GO:0000715	nucleotide-excision repair, DNA damage recognition	48	10	2.76	287	0.00034	0.03838
GO:0098609	cell-cell adhesion	2187	118	125.71	63	0.0005	0.00313
GO:0043436	oxoacid metabolic process	1409	100	80.99	140	0.00061	0.01317
GO:0010388	cullin deneddylation	14	5	0.8	184	0.00081	0.0189
GO:0006635	fatty acid beta-oxidation	100	13	5.75	23	0.00083	0.00013
GO:0042769	DNA damage response, detection of DNA damage	73	12	4.2	83	0.00088	0.00608
GO:0030490	maturation of SSU-rRNA	96	14	5.52	377	0.00091	0.05535
GO:0006703	estrogen biosynthetic process	21	6	1.21	212	0.00092	0.02383
GO:0006278	RNA-dependent DNA biosynthetic process	140	12	8.05	117	0.00108	0.01085
GO:0006351	transcription, DNA-templated	6072	299	349.01	327	0.00172	0.04656
GO:0097010	eukaryotic translation initiation factor 4F complex assembly	10	4	0.57	57	0.00173	0.00235
GO:0000722	telomere maintenance via recombination	59	10	3.39	67	0.00182	0.00386
GO:0032508	DNA duplex unwinding	142	20	8.16	791	0.00194	0.13844
GO:0019076	viral release from host cell	72	8	4.14	37	0.00259	0.00095
GO:1900264	positive regulation of DNA-directed DNA polymerase activity	11	4	0.63	231	0.00259	0.02708
GO:0006293	nucleotide-excision repair, preincision complex stabilization	34	7	1.95	295	0.00279	0.04034
GO:0070900	mitochondrial tRNA modification	18	5	1.03	101	0.00284	0.00841
GO:0016254	preassembly of GPI anchor in ER membrane	26	6	1.49	74	0.00304	0.00449
GO:0051031	tRNA transport	60	11	3.45	52	0.00329	0.00219
GO:0007008	outer mitochondrial membrane organization	20	4	1.15	54	0.00332	0.0022
GO:2001057	reactive nitrogen species metabolic process	133	10	7.64	112	0.00333	0.00977
GO:0022904	respiratory electron transport chain	125	22	7.18	253	0.00357	0.02998
GO:0071474	cellular hyperosmotic response	12	4	0.69	93	0.00371	0.00724
GO:0035927	RNA import into mitochondrion	12	4	0.69	81	0.00371	0.00569
GO:0006295	nucleotide-excision repair, DNA incision, 3'-to lesion	36	7	2.07	221	0.00392	0.02573
GO:0016485	protein processing	384	27	22.07	111	0.00405	0.00966
GO:0070987	error-free translesion synthesis	46	8	2.64	73	0.00432	0.00449
GO:0030488	tRNA methylation	47	8	2.7	342	0.00495	0.04956
GO:1901607	alpha-amino acid biosynthetic process	117	10	6.72	68	0.00511	0.00388
GO:1903825	organic acid transmembrane transport	107	8	6.15	335	0.00558	0.04828
GO:0006363	termination of RNA polymerase I transcription	48	8	2.76	304	0.00565	0.04253
GO:0018279	protein N-linked glycosylation via asparagine	69	10	3.97	363	0.00587	0.05311
GO:0042176	regulation of protein catabolic process	682	34	39.2	223	0.006	0.02592
GO:0006457	protein folding	364	32	20.92	16	0.00634	1.2e-05
GO:0006694	steroid biosynthetic process	218	18	12.53	250	0.00642	0.02973
GO:0008216	spermidine metabolic process	14	4	0.8	144	0.00684	0.01409
GO:0071472	cellular response to salt stress	14	4	0.8	29	0.00684	0.00026
GO:0071549	cellular response to dexamethasone stimulus	50	8	2.87	116	0.00726	0.01071
GO:0006361	transcription initiation from RNA polymerase I promoter	51	8	2.93	438	0.00819	0.06936
GO:0022400	regulation of rhodopsin mediated signaling pathway	41	7	2.36	374	0.00823	0.05477
GO:0009143	nucleoside triphosphate catabolic process	21	6	1.21	381	0.0085	0.05633
GO:0035336	long-chain fatty-acyl-CoA metabolic process	81	7	4.66	995	0.00853	0.17945
GO:0075522	IRES-dependent viral translational initiation	23	5	1.32	479	0.0088	0.07719
GO:0006782	protoporphyrinogen IX biosynthetic process	15	4	0.86	186	0.0089	0.01913
GO:0070389	chaperone cofactor-dependent protein refolding	15	4	0.86	918	0.0089	0.16583
GO:0006099	tricarboxylic acid cycle	52	8	2.99	32	0.0092	0.00038
GO:0042276	error-prone translesion synthesis	42	7	2.41	384	0.0094	0.05667
GO:0045738	negative regulation of DNA repair	26	3	1.49	319	0.00953	0.04541
GO:0006633	fatty acid biosynthetic process	218	16	12.53	118	0.00968	0.011
GO:1902600	hydrogen ion transmembrane transport	181	26	10.4	678	0.00998	0.11706
GO:0010827	regulation of glucose transport	195	18	11.21	282	0.01024	0.03734
GO:0006294	nucleotide-excision repair, preincision complex assembly	53	8	3.05	736	0.01031	0.12908
GO:0006122	mitochondrial electron transport, ubiquinol to cytochrome c	24	5	1.38	30	0.01059	0.0003
GO:0070911	global genome nucleotide-excision repair	76	10	4.37	419	0.01149	0.06462
GO:0006409	tRNA export from nucleus	54	8	3.1	45	0.01151	0.00169
GO:0015991	ATP hydrolysis coupled proton transport	54	8	3.1	769	0.01151	0.13459
GO:0000717	nucleotide-excision repair, DNA duplex unwinding	44	7	2.53	1268	0.01209	0.23304
GO:0090266	regulation of mitotic cell cycle spindle assembly checkpoint	19	4	1.09	783	0.01224	0.13693
GO:0032205	negative regulation of telomere maintenance	60	5	3.45	647	0.01227	0.10992
GO:2000001	regulation of DNA damage checkpoint	25	5	1.44	315	0.01263	0.04433
GO:0032981	mitochondrial respiratory chain complex I assembly	78	10	4.48	17	0.01367	2.2e-05
GO:0042693	muscle cell fate commitment	31	5	1.78	217	0.01416	0.02452
GO:0007005	mitochondrion organization	1051	94	60.41	106	0.01439	0.00912
GO:0046688	response to copper ion	36	6	2.07	39	0.01578	0.00104
GO:0018410	C-terminal protein amino acid modification	22	6	1.26	102	0.0167	0.00853
GO:0009264	deoxyribonucleotide catabolic process	28	5	1.61	585	0.01674	0.09735
GO:0000720	pyrimidine dimer repair by nucleotide-excision repair	10	3	0.57	173	0.01677	0.01757
GO:0045213	neurotransmitter receptor metabolic process	10	3	0.57	1562	0.01677	0.29196
GO:0030210	heparin biosynthetic process	10	3	0.57	693	0.01677	0.11983
GO:0042274	ribosomal small subunit biogenesis	151	24	8.68	404	0.01694	0.06143
GO:0000387	spliceosomal snRNP assembly	66	9	3.79	28	0.01706	0.00024
GO:0000422	mitophagy	143	13	8.22	1668	0.01708	0.31465
GO:0006264	mitochondrial DNA replication	18	4	1.03	75	0.0174	0.00453
GO:0018298	protein-chromophore linkage	18	4	1.03	76	0.0174	0.00459
GO:0051347	positive regulation of transferase activity	1150	73	66.1	24	0.01777	0.00014
GO:0044283	small molecule biosynthetic process	798	58	45.87	836	0.01808	0.14817
GO:0019081	viral translation	27	7	1.55	203	0.01824	0.02176
GO:0006220	pyrimidine nucleotide metabolic process	73	8	4.2	809	0.01828	0.14208
GO:0070897	DNA-templated transcriptional preinitiation complex assembly	63	6	3.62	1043	0.01831	0.18698
GO:0042790	transcription of nuclear large rRNA transcript from RNA polymerase I promoter	22	3	1.26	1044	0.01833	0.18699
GO:0006362	transcription elongation from RNA polymerase I promoter	48	7	2.76	521	0.01907	0.08431
GO:0044712	single-organism catabolic process	1343	101	77.19	595	0.01919	0.09889
GO:0007077	mitotic nuclear envelope disassembly	71	9	4.08	976	0.0201	0.17655
GO:0045070	positive regulation of viral genome replication	71	9	4.08	866	0.0201	0.15371
GO:0000723	telomere maintenance	267	26	15.35	84	0.02071	0.00622
GO:0060982	coronary artery morphogenesis	19	4	1.09	727	0.02106	0.12667
GO:0016236	macroautophagy	412	31	23.68	451	0.02116	0.07197
GO:0048660	regulation of smooth muscle cell proliferation	200	12	11.5	766	0.02117	0.13438
GO:0042775	mitochondrial ATP synthesis coupled electron transport	105	17	6.04	238	0.02176	0.0282
GO:0046386	deoxyribose phosphate catabolic process	29	5	1.67	652	0.02205	0.11088
GO:1903232	melanosome assembly	11	3	0.63	448	0.02208	0.07152
GO:1902231	positive regulation of intrinsic apoptotic signaling pathway in response to DNA damage	11	3	0.63	1849	0.02208	0.35123
GO:0042538	hyperosmotic salinity response	11	3	0.63	157	0.02208	0.01543
GO:0097191	extrinsic apoptotic signaling pathway	425	26	24.43	270	0.02317	0.03442
GO:0021762	substantia nigra development	73	9	4.2	1982	0.02369	0.3799
GO:0050714	positive regulation of protein secretion	372	23	21.38	688	0.0241	0.11853
GO:0070914	UV-damage excision repair	20	4	1.15	267	0.02516	0.03322
GO:0009083	branched-chain amino acid catabolic process	30	5	1.72	85	0.02675	0.00623
GO:0009060	aerobic respiration	115	16	6.61	746	0.02684	0.13133
GO:0071364	cellular response to epidermal growth factor stimulus	75	9	4.31	824	0.02771	0.14516
GO:0006119	oxidative phosphorylation	133	20	7.64	234	0.02773	0.0274
GO:0051823	regulation of synapse structural plasticity	24	5	1.38	1038	0.02815	0.18632
GO:0021955	central nervous system neuron axonogenesis	45	5	2.59	1980	0.0282	0.37983
GO:0034656	nucleobase-containing small molecule catabolic process	12	3	0.69	326	0.02821	0.04644
GO:0006598	polyamine catabolic process	12	3	0.69	165	0.02821	0.01677
GO:0006501	C-terminal protein lipidation	12	3	0.69	130	0.02821	0.01201
GO:0006297	nucleotide-excision repair, DNA gap filling	52	7	2.99	274	0.02846	0.03571
GO:1900087	positive regulation of G1/S transition of mitotic cell cycle	41	6	2.36	2493	0.0286	0.46472
GO:1902808	positive regulation of cell cycle G1/S phase transition	46	8	2.64	1064	0.02926	0.19171
GO:0070301	cellular response to hydrogen peroxide	131	14	7.53	2252	0.02926	0.42472
GO:0051917	regulation of fibrinolysis	19	3	1.09	1209	0.02938	0.22259
GO:0099601	regulation of neurotransmitter receptor activity	52	4	2.99	224	0.02941	0.02597
GO:0014904	myotube cell development	59	4	3.39	1316	0.02943	0.24506
GO:0031333	negative regulation of protein complex assembly	233	21	13.39	1330	0.02957	0.24716
GO:0046459	short-chain fatty acid metabolic process	21	4	1.21	43	0.0297	0.00161
GO:0046415	urate metabolic process	21	4	1.21	399	0.0297	0.06057
GO:0090502	RNA phosphodiester bond hydrolysis, endonucleolytic	108	10	6.21	592	0.02998	0.09843
GO:0043968	histone H2A acetylation	31	5	1.78	241	0.03043	0.02849
GO:0032206	positive regulation of telomere maintenance	106	9	6.09	2263	0.03046	0.42568
GO:0007584	response to nutrient	290	16	16.67	2667	0.03376	0.49727
GO:1904874	positive regulation of telomerase RNA localization to Cajal body	32	5	1.84	31	0.03442	0.00036
GO:0031116	positive regulation of microtubule polymerization	22	4	1.26	1051	0.03469	0.18889
GO:0006768	biotin metabolic process	22	4	1.26	121	0.03469	0.01116
GO:0001561	fatty acid alpha-oxidation	13	3	0.75	147	0.03514	0.0146
GO:0006167	AMP biosynthetic process	13	3	0.75	1564	0.03514	0.29239
GO:0090091	positive regulation of extracellular matrix disassembly	13	3	0.75	2127	0.03514	0.4022
GO:0009204	deoxyribonucleoside triphosphate catabolic process	13	3	0.75	1101	0.03514	0.19965
GO:0006417	regulation of translation	611	53	35.12	1487	0.03538	0.27672
GO:0036297	interstrand cross-link repair	92	10	5.29	712	0.03838	0.12448
GO:0046685	response to arsenic-containing substance	43	5	2.47	1217	0.04016	0.22374
GO:0034260	negative regulation of GTPase activity	68	8	3.91	1947	0.04066	0.37115
GO:0006720	isoprenoid metabolic process	186	20	10.69	795	0.04203	0.13927
GO:0016056	rhodopsin mediated signaling pathway	47	9	2.7	229	0.04218	0.0269
GO:0034308	primary alcohol metabolic process	74	10	4.25	658	0.04221	0.11198
GO:0000271	polysaccharide biosynthetic process	133	12	7.64	476	0.04228	0.07653
GO:0018206	peptidyl-methionine modification	18	4	1.03	1663	0.04235	0.3137
GO:0032732	positive regulation of interleukin-1 production	63	5	3.62	1810	0.04243	0.34402
GO:0030865	cortical cytoskeleton organization	50	4	2.87	169	0.04245	0.01711
GO:0006506	GPI anchor biosynthetic process	52	10	2.99	96	0.04252	0.00764
GO:0002040	sprouting angiogenesis	138	13	7.93	2575	0.04257	0.48107
GO:0006879	cellular iron ion homeostasis	81	9	4.66	1679	0.04258	0.31653
GO:0016101	diterpenoid metabolic process	134	13	7.7	153	0.04264	0.01515
GO:0046185	aldehyde catabolic process	25	4	1.44	474	0.04283	0.07637
GO:0002703	regulation of leukocyte mediated immunity	267	9	15.35	456	0.04283	0.07311
GO:0007021	tubulin complex assembly	14	3	0.8	527	0.04285	0.08531
GO:0021800	cerebral cortex tangential migration	14	3	0.8	665	0.04285	0.11312
GO:0042045	epithelial fluid transport	14	3	0.8	800	0.04285	0.13977
GO:0017085	response to insecticide	14	3	0.8	1510	0.04285	0.28171
GO:0009157	deoxyribonucleoside monophosphate biosynthetic process	14	3	0.8	89	0.04285	0.00651
GO:0098719	sodium ion import across plasma membrane	14	3	0.8	225	0.04285	0.02636
GO:0032259	methylation	573	41	32.94	343	0.04285	0.04967
GO:0000732	strand displacement	57	7	3.28	692	0.04405	0.11932
GO:0006271	DNA strand elongation involved in DNA replication	38	6	2.18	530	0.04594	0.08654
GO:0043928	exonucleolytic nuclear-transcribed mRNA catabolic process involved in deadenylation-dependent decay	46	6	2.64	862	0.04688	0.15193
GO:0000462	maturation of SSU-rRNA from tricistronic rRNA transcript (SSU-rRNA, 5.8S rRNA, LSU-rRNA)	75	8	4.31	113	0.04771	0.00984
GO:0010906	regulation of glucose metabolic process	176	15	10.12	1523	0.04802	0.2847
GO:0006816	calcium ion transport	631	36	36.27	493	0.04827	0.07908
GO:0046330	positive regulation of JNK cascade	212	17	12.19	3048	0.04886	0.56332
GO:0009062	fatty acid catabolic process	127	19	7.3	2086	0.05055	0.39684
GO:0060017	parathyroid gland development	15	3	0.86	1958	0.05134	0.37428
GO:0042048	olfactory behavior	15	3	0.86	2486	0.05134	0.46358
GO:0071679	commissural neuron axon guidance	15	3	0.86	1465	0.05134	0.27126
GO:0000245	spliceosomal complex assembly	98	7	5.63	560	0.05149	0.09219
GO:0034389	lipid particle organization	25	4	1.44	339	0.05242	0.04924
GO:0007004	telomere maintenance via telomerase	131	8	7.53	1949	0.05264	0.37279
GO:0006412	translation	1449	192	83.29	199	0.05614	0.02107
GO:0002920	regulation of humoral immune response	70	7	4.02	207	0.05707	0.0225
GO:0006949	syncytium formation	80	7	4.6	2412	0.05711	0.45139
GO:0031365	N-terminal protein amino acid modification	47	5	2.7	1519	0.05711	0.28412
GO:0046184	aldehyde biosynthetic process	21	3	1.21	1375	0.05715	0.2536
GO:0070875	positive regulation of glycogen metabolic process	27	5	1.55	776	0.05739	0.13621
GO:0030814	regulation of cAMP metabolic process	210	10	12.07	1198	0.05741	0.22065
GO:0009164	nucleoside catabolic process	56	5	3.22	793	0.05745	0.13864
GO:0033139	regulation of peptidyl-serine phosphorylation of STAT protein	30	3	1.72	792	0.05747	0.13848
GO:0046174	polyol catabolic process	31	3	1.78	811	0.05747	0.14212
GO:0098543	detection of other organism	16	2	0.92	869	0.05747	0.1554
GO:0072698	protein localization to microtubule cytoskeleton	51	4	2.93	890	0.05747	0.16028
GO:0006312	mitotic recombination	85	14	4.89	924	0.05848	0.16724
GO:0043248	proteasome assembly	26	4	1.49	338	0.05924	0.0492
GO:0045725	positive regulation of glycogen biosynthetic process	26	4	1.49	994	0.05924	0.17912
GO:0019064	fusion of virus membrane with host plasma membrane	26	4	1.49	3251	0.05924	0.59806
GO:0018198	peptidyl-cysteine modification	64	5	3.68	135	0.05938	0.01277
GO:0051924	regulation of calcium ion transport	340	18	19.54	1342	0.05971	0.24835
GO:0022616	DNA strand elongation	54	9	3.1	1925	0.06021	0.36466
GO:1901224	positive regulation of NIK/NF-kappaB signaling	49	6	2.82	2057	0.06047	0.39189
GO:0033617	mitochondrial respiratory chain complex IV assembly	16	3	0.92	387	0.06057	0.05748
GO:0071281	cellular response to iron ion	16	3	0.92	2658	0.06057	0.49637
GO:0070886	positive regulation of calcineurin-NFAT signaling cascade	16	3	0.92	2156	0.06057	0.40851
GO:0032786	positive regulation of DNA-templated transcription, elongation	36	4	2.07	929	0.06059	0.16794
GO:0006513	protein monoubiquitination	90	8	5.17	802	0.06072	0.13981
GO:0043161	proteasome-mediated ubiquitin-dependent protein catabolic process	728	46	41.84	53	0.06125	0.00219
GO:0000413	protein peptidyl-prolyl isomerization	74	8	4.25	98	0.06165	0.00773
GO:0051262	protein tetramerization	203	19	11.67	2031	0.06505	0.38645
GO:0005975	carbohydrate metabolic process	924	70	53.11	189	0.0651	0.01946
GO:0043507	positive regulation of JUN kinase activity	103	6	5.92	1865	0.06529	0.35459
GO:0007292	female gamete generation	174	14	10	3013	0.06631	0.55824
GO:0060037	pharyngeal system development	42	6	2.41	1886	0.06636	0.35714
GO:0006069	ethanol oxidation	27	4	1.55	61	0.06651	0.00265
GO:0060134	prepulse inhibition	27	4	1.55	3194	0.06651	0.58921
GO:0000289	nuclear-transcribed mRNA poly(A) tail shortening	76	8	4.37	524	0.06992	0.085
GO:0006000	fructose metabolic process	27	5	1.55	621	0.07036	0.10346
GO:0015793	glycerol transport	17	3	0.98	2706	0.07052	0.50392
GO:0043116	negative regulation of vascular permeability	17	3	0.98	2106	0.07052	0.39927
GO:0043587	tongue morphogenesis	17	3	0.98	2471	0.07052	0.46107
GO:0036010	protein localization to endosome	17	3	0.98	2744	0.07052	0.51153
GO:0055010	ventricular cardiac muscle tissue morphogenesis	72	9	4.14	906	0.07074	0.16301
GO:1901687	glutathione derivative biosynthetic process	39	5	2.24	2284	0.07107	0.43021
GO:0006541	glutamine metabolic process	39	5	2.24	88	0.07107	0.0065
GO:0000045	autophagosome assembly	124	10	7.13	465	0.07109	0.07471
GO:0015711	organic anion transport	507	20	29.14	3020	0.07176	0.55911
GO:0075733	intracellular transport of virus	113	12	6.5	1024	0.0718	0.18423
GO:0051289	protein homotetramerization	103	10	5.92	1534	0.07215	0.28589
GO:0019682	glyceraldehyde-3-phosphate metabolic process	45	5	2.59	262	0.0733	0.03215
GO:0000054	ribosomal subunit export from nucleus	28	4	1.61	70	0.0733	0.00414
GO:0006266	DNA ligation	46	4	2.64	60	0.07338	0.00263
GO:0007044	cell-substrate junction assembly	170	10	9.77	2193	0.07348	0.41365
GO:0015748	organophosphate ester transport	121	7	6.95	1957	0.07349	0.37384
GO:0097479	synaptic vesicle localization	203	11	11.67	2491	0.07356	0.46418
GO:0071320	cellular response to cAMP	90	9	5.17	2710	0.07362	0.50484
GO:0051348	negative regulation of transferase activity	647	34	37.19	2122	0.07378	0.40173
GO:0035269	protein O-linked mannosylation	28	4	1.61	279	0.07421	0.03708
GO:0006531	aspartate metabolic process	28	4	1.61	226	0.07421	0.02641
GO:0060291	long-term synaptic potentiation	92	8	5.29	1096	0.07667	0.19891
GO:0010165	response to X-ray	64	8	3.68	2970	0.07729	0.55052
GO:0031424	keratinization	78	8	4.48	3169	0.07883	0.58415
GO:0006637	acyl-CoA metabolic process	150	13	8.62	426	0.08084	0.06588
GO:0007184	SMAD protein import into nucleus	44	6	2.53	2900	0.08095	0.54079
GO:0006700	C21-steroid hormone biosynthetic process	32	4	1.84	2224	0.08112	0.421
GO:0006123	mitochondrial electron transport, cytochrome c to oxygen	18	3	1.03	86	0.08114	0.00624
GO:0051683	establishment of Golgi localization	18	3	1.03	2569	0.08114	0.47983
GO:0061084	negative regulation of protein refolding	18	3	1.03	1894	0.08114	0.35965
GO:0042148	strand invasion	18	3	1.03	631	0.08114	0.10684
GO:0001302	replicative cell aging	18	3	1.03	1173	0.08114	0.21492
GO:0072015	glomerular visceral epithelial cell development	18	3	1.03	1556	0.08114	0.29101
GO:0002643	regulation of tolerance induction	36	4	2.07	927	0.08114	0.16765
GO:0070542	response to fatty acid	73	9	4.2	254	0.08197	0.03005
GO:0021542	dentate gyrus development	29	4	1.67	2748	0.08235	0.51188
GO:0044804	nucleophagy	29	4	1.67	1716	0.08235	0.3236
GO:0009235	cobalamin metabolic process	29	4	1.67	3677	0.08235	0.66985
GO:0043122	regulation of I-kappaB kinase/NF-kappaB signaling	430	17	24.72	583	0.08236	0.097
GO:0047496	vesicle transport along microtubule	55	5	3.16	2161	0.08242	0.40924
GO:0000731	DNA synthesis involved in DNA repair	145	17	8.33	1405	0.08271	0.26021
GO:0033674	positive regulation of kinase activity	877	49	50.41	777	0.08294	0.13622
GO:0042273	ribosomal large subunit biogenesis	224	42	12.88	19	0.08639	8.7e-05
GO:0032774	RNA biosynthetic process	6609	398	379.88	932	0.08943	0.16872
GO:0014033	neural crest cell differentiation	133	11	7.64	873	0.09064	0.15717
GO:0006999	nuclear pore organization	26	4	1.49	50	0.09073	0.00206
GO:0002312	B cell activation involved in immune response	111	8	6.38	1085	0.09082	0.19599
GO:0048569	post-embryonic animal organ development	37	3	2.13	3123	0.09089	0.57696
GO:0016048	detection of temperature stimulus	37	3	2.13	1210	0.09089	0.22269
GO:0016073	snRNA metabolic process	118	7	6.78	682	0.09096	0.11729
GO:0002437	inflammatory response to antigenic stimulus	79	6	4.54	1719	0.09104	0.32372
GO:0030099	myeloid cell differentiation	584	35	33.57	3224	0.09104	0.59263
GO:0006942	regulation of striated muscle contraction	153	7	8.79	1941	0.09117	0.37019
GO:0032680	regulation of tumor necrosis factor production	182	8	10.46	2416	0.09123	0.45218
GO:0042476	odontogenesis	203	11	11.67	71	0.09139	0.00416
GO:0006730	one-carbon metabolic process	54	6	3.1	2096	0.09141	0.39789
GO:0005980	glycogen catabolic process	42	5	2.41	179	0.09147	0.01806
GO:0006479	protein methylation	281	13	16.15	329	0.09181	0.04722
GO:0006783	heme biosynthetic process	34	7	1.95	365	0.09197	0.05389
GO:0032071	regulation of endodeoxyribonuclease activity	31	5	1.78	1993	0.09222	0.38147
GO:0046500	S-adenosylmethionine metabolic process	35	5	2.01	1166	0.09225	0.21336
GO:0009992	cellular water homeostasis	19	3	1.09	1620	0.0924	0.30561
GO:0034975	protein folding in endoplasmic reticulum	19	3	1.09	2765	0.0924	0.51537
GO:0060391	positive regulation of SMAD protein import into nucleus	19	3	1.09	3137	0.0924	0.57786
GO:0006390	transcription from mitochondrial promoter	19	3	1.09	655	0.0924	0.11168
GO:0006183	GTP biosynthetic process	19	3	1.09	128	0.0924	0.01179
GO:0042118	endothelial cell activation	19	3	1.09	2501	0.0924	0.46627
GO:0006975	DNA damage induced protein phosphorylation	19	3	1.09	1786	0.0924	0.33686
GO:0007131	reciprocal meiotic recombination	80	9	4.6	2669	0.09436	0.49763
GO:0006298	mismatch repair	69	8	3.97	219	0.09444	0.02499
GO:0006626	protein targeting to mitochondrion	268	19	15.4	107	0.09454	0.00913
GO:0006120	mitochondrial electron transport, NADH to ubiquinone	55	6	3.16	22	0.09471	0.00013
GO:1901796	regulation of signal transduction by p53 class mediator	323	21	18.57	1561	0.09472	0.29187
GO:0045471	response to ethanol	213	17	12.24	1652	0.09692	0.31152
GO:0045859	regulation of protein kinase activity	1264	67	72.65	613	0.09715	0.10203
GO:0060070	canonical Wnt signaling pathway	500	29	28.74	3049	0.09943	0.56334
GO:0001574	ganglioside biosynthetic process	31	4	1.78	1135	0.09986	0.20733
GO:0006094	gluconeogenesis	151	12	8.68	163	0.1039	0.01669
GO:0051156	glucose 6-phosphate metabolic process	57	6	3.28	2195	0.10414	0.41414
GO:0055089	fatty acid homeostasis	20	3	1.15	320	0.10427	0.04549
GO:0048521	negative regulation of behavior	20	3	1.15	218	0.10427	0.02479
GO:1900119	positive regulation of execution phase of apoptosis	20	3	1.15	2552	0.10427	0.47646
GO:0000730	DNA recombinase assembly	20	3	1.15	445	0.10427	0.07062
GO:0046325	negative regulation of glucose import	20	3	1.15	2342	0.10427	0.43941
GO:0090005	negative regulation of establishment of protein localization to plasma membrane	20	3	1.15	2888	0.10427	0.53931
GO:0006516	glycoprotein catabolic process	20	3	1.15	1060	0.10427	0.19111
GO:0050746	regulation of lipoprotein metabolic process	20	3	1.15	812	0.10427	0.14216
GO:0019430	removal of superoxide radicals	42	4	2.41	172	0.10431	0.01757
GO:0043029	T cell homeostasis	67	8	3.85	2849	0.10619	0.53171
GO:0071398	cellular response to fatty acid	44	5	2.53	2049	0.10656	0.39046
GO:0046627	negative regulation of insulin receptor signaling pathway	57	6	3.28	2915	0.10793	0.54239
GO:0033108	mitochondrial respiratory chain complex assembly	116	14	6.67	152	0.10864	0.01506
GO:0002260	lymphocyte homeostasis	104	11	5.98	3104	0.10891	0.57357
GO:0021559	trigeminal nerve development	20	3	1.15	3508	0.1093	0.64217
GO:0018065	protein-cofactor linkage	20	3	1.15	174	0.1093	0.01757
GO:0030903	notochord development	22	3	1.26	1773	0.10931	0.33362
GO:0045657	positive regulation of monocyte differentiation	10	2	0.57	2735	0.10935	0.50975
GO:0060052	neurofilament cytoskeleton organization	10	2	0.57	3016	0.10935	0.55839
GO:0048478	replication fork protection	10	2	0.57	2225	0.10935	0.42125
GO:0031086	nuclear-transcribed mRNA catabolic process, deadenylation-independent decay	10	2	0.57	2823	0.10935	0.52498
GO:0048865	stem cell fate commitment	10	2	0.57	3120	0.10935	0.57647
GO:0006001	fructose catabolic process	10	2	0.57	143	0.10935	0.01367
GO:0072578	neurotransmitter-gated ion channel clustering	10	2	0.57	624	0.10935	0.10434
GO:0060296	regulation of cilium beat frequency involved in ciliary motility	10	2	0.57	313	0.10935	0.04421
GO:0039532	negative regulation of viral-induced cytoplasmic pattern recognition receptor signaling pathway	10	2	0.57	3140	0.10935	0.57853
GO:0019640	glucuronate catabolic process to xylulose 5-phosphate	10	2	0.57	122	0.10935	0.01136
GO:0044597	daunorubicin metabolic process	10	2	0.57	506	0.10935	0.0812
GO:0044598	doxorubicin metabolic process	10	2	0.57	507	0.10935	0.0812
GO:0003253	cardiac neural crest cell migration involved in outflow tract morphogenesis	10	2	0.57	405	0.10935	0.06159
GO:0014029	neural crest formation	10	2	0.57	589	0.10935	0.09798
GO:0002371	dendritic cell cytokine production	10	2	0.57	3151	0.10935	0.58067
GO:0009438	methylglyoxal metabolic process	10	2	0.57	764	0.10935	0.13365
GO:0018406	protein C-linked glycosylation via 2'-alpha-mannosyl-L-tryptophan	10	2	0.57	1661	0.10935	0.31328
GO:0009146	purine nucleoside triphosphate catabolic process	10	2	0.57	1656	0.10935	0.31229
GO:0046784	viral mRNA export from host cell nucleus	10	2	0.57	1250	0.10935	0.22929
GO:0045359	positive regulation of interferon-beta biosynthetic process	10	2	0.57	418	0.10935	0.06461
GO:0006564	L-serine biosynthetic process	10	2	0.57	491	0.10935	0.07874
GO:0042256	mature ribosome assembly	10	2	0.57	1089	0.10935	0.1969
GO:0002759	regulation of antimicrobial humoral response	10	2	0.57	987	0.10935	0.17803
GO:0002740	negative regulation of cytokine secretion involved in immune response	10	2	0.57	2637	0.10935	0.49377
GO:0030321	transepithelial chloride transport	10	2	0.57	258	0.10935	0.03077
GO:0034755	iron ion transmembrane transport	10	2	0.57	3105	0.10935	0.57398
GO:0032077	positive regulation of deoxyribonuclease activity	10	2	0.57	1953	0.10935	0.37342
GO:0072676	lymphocyte migration	117	4	6.72	2368	0.10985	0.44451
GO:0018022	peptidyl-lysine methylation	203	7	11.67	1391	0.11008	0.25761
GO:0060828	regulation of canonical Wnt signaling pathway	406	20	23.34	1414	0.11029	0.2618
GO:0007605	sensory perception of sound	275	21	15.81	3331	0.11103	0.60878
GO:0006778	porphyrin-containing compound metabolic process	52	8	2.99	2421	0.11137	0.45325
GO:0019400	alditol metabolic process	32	4	1.84	1622	0.11157	0.30594
GO:0006221	pyrimidine nucleotide biosynthetic process	50	5	2.87	2025	0.11157	0.38526
GO:0051255	spindle midzone assembly	19	3	1.09	1965	0.11158	0.37611
GO:0071696	ectodermal placode development	38	4	2.18	600	0.11159	0.09957
GO:1903053	regulation of extracellular matrix organization	57	5	3.28	668	0.1116	0.11437
GO:0090049	regulation of cell migration involved in sprouting angiogenesis	40	4	2.3	2194	0.1116	0.41368
GO:0006705	mineralocorticoid biosynthetic process	16	2	0.92	2000	0.11164	0.38261
GO:0031657	regulation of cyclin-dependent protein serine/threonine kinase activity involved in G1/S transition ...	17	2	0.98	2363	0.11165	0.44357
GO:0010657	muscle cell apoptotic process	89	6	5.12	356	0.11166	0.05199
GO:0009185	ribonucleoside diphosphate metabolic process	187	11	10.75	2018	0.1117	0.38411
GO:1904591	positive regulation of protein import	154	9	8.85	2228	0.11171	0.42182
GO:0010629	negative regulation of gene expression	2544	115	146.23	741	0.1128	0.13051
GO:0006383	transcription from RNA polymerase III promoter	87	9	5	87	0.11417	0.00646
GO:2000463	positive regulation of excitatory postsynaptic potential	45	5	2.59	4215	0.11454	0.75901
GO:0001782	B cell homeostasis	45	5	2.59	3750	0.11454	0.68237
GO:0009890	negative regulation of biosynthetic process	2587	106	148.7	558	0.11503	0.09154
GO:0097502	mannosylation	64	8	3.68	91	0.11627	0.00669
GO:0006195	purine nucleotide catabolic process	90	8	5.17	2580	0.11653	0.48239
GO:2000679	positive regulation of transcription regulatory region DNA binding	21	3	1.21	1155	0.1167	0.21173
GO:0045910	negative regulation of DNA recombination	21	3	1.21	1688	0.1167	0.31763
GO:0042473	outer ear morphogenesis	21	3	1.21	555	0.1167	0.09089
GO:0034101	erythrocyte homeostasis	201	12	11.55	395	0.11693	0.05931
GO:0007338	single fertilization	183	14	10.52	2269	0.11892	0.42656
GO:0016226	iron-sulfur cluster assembly	33	4	1.9	1700	0.11893	0.31958
GO:0001843	neural tube closure	157	12	9.02	3019	0.1191	0.5586
GO:0019068	virion assembly	72	7	4.14	180	0.11911	0.0182
GO:0043393	regulation of protein binding	329	15	18.91	531	0.1202	0.08662
GO:0009615	response to virus	547	26	31.44	752	0.12242	0.13203
GO:0035357	peroxisome proliferator activated receptor signaling pathway	30	4	1.72	3544	0.12861	0.64872
GO:2001016	positive regulation of skeletal muscle cell differentiation	11	2	0.63	155	0.12874	0.01523
GO:0051029	rRNA transport	11	2	0.63	3496	0.12874	0.64035
GO:0001682	tRNA 5'-leader removal	11	2	0.63	205	0.12874	0.02228
GO:0051344	negative regulation of cyclic-nucleotide phosphodiesterase activity	11	2	0.63	2253	0.12874	0.42477
GO:1903401	L-lysine transmembrane transport	11	2	0.63	3064	0.12874	0.56681
GO:0019673	GDP-mannose metabolic process	11	2	0.63	36	0.12874	0.00088
GO:0009304	tRNA transcription	11	2	0.63	1058	0.12874	0.18991
GO:1903826	arginine transmembrane transport	11	2	0.63	3065	0.12874	0.56681
GO:0032909	regulation of transforming growth factor beta2 production	11	2	0.63	2889	0.12874	0.53935
GO:0090043	regulation of tubulin deacetylation	11	2	0.63	953	0.12874	0.17262
GO:0018158	protein oxidation	11	2	0.63	660	0.12874	0.11216
GO:0009134	nucleoside diphosphate catabolic process	11	2	0.63	307	0.12874	0.04334
GO:0034310	primary alcohol catabolic process	11	2	0.63	945	0.12874	0.17105
GO:2000348	regulation of CD40 signaling pathway	11	2	0.63	2077	0.12874	0.39578
GO:0000972	transcription-dependent tethering of RNA polymerase II gene DNA at nuclear periphery	11	2	0.63	129	0.12874	0.01194
GO:0042760	very long-chain fatty acid catabolic process	11	2	0.63	349	0.12874	0.05028
GO:1990403	embryonic brain development	11	2	0.63	3175	0.12874	0.58576
GO:0043985	histone H4-R3 methylation	11	2	0.63	100	0.12874	0.00828
GO:0070235	regulation of activation-induced cell death of T cells	11	2	0.63	2680	0.12874	0.49946
GO:0009635	response to herbicide	11	2	0.63	919	0.12874	0.16591
GO:0035493	SNARE complex assembly	29	3	1.67	3767	0.12874	0.68545
GO:0072673	lamellipodium morphogenesis	33	3	1.9	2069	0.12878	0.39439
GO:0003009	skeletal muscle contraction	67	6	3.85	2572	0.12899	0.48054
GO:0010738	regulation of protein kinase A signaling	34	4	1.95	2330	0.12901	0.43761
GO:0034764	positive regulation of transmembrane transport	204	10	11.73	161	0.12917	0.01624
GO:0009303	rRNA transcription	44	6	2.53	594	0.12933	0.0987
GO:0090004	positive regulation of establishment of protein localization to plasma membrane	60	6	3.45	3683	0.12943	0.67052
GO:0071340	skeletal muscle acetylcholine-gated channel clustering	22	3	1.26	854	0.12965	0.15113
GO:0060539	diaphragm development	22	3	1.26	726	0.12965	0.12658
GO:0006241	CTP biosynthetic process	22	3	1.26	69	0.12965	0.004
GO:0055114	oxidation-reduction process	1612	130	92.66	62	0.12986	0.00267
GO:0022409	positive regulation of cell-cell adhesion	437	23	25.12	3601	0.12995	0.65631
GO:0048208	COPII vesicle coating	116	10	6.67	159	0.13062	0.01586
GO:0032008	positive regulation of TOR signaling	47	5	2.7	496	0.13131	0.07997
GO:0060071	Wnt signaling pathway, planar cell polarity pathway	199	15	11.44	77	0.13645	0.00467
GO:0032956	regulation of actin cytoskeleton organization	480	28	27.59	3632	0.13765	0.66157
GO:0048538	thymus development	75	7	4.31	2046	0.13915	0.38956
GO:0007413	axonal fasciculation	35	4	2.01	3469	0.13944	0.63609
GO:0060292	long term synaptic depression	35	4	2.01	1546	0.13944	0.2892
GO:0035902	response to immobilization stress	35	4	2.01	2145	0.13944	0.40548
GO:0048477	oogenesis	128	9	7.36	2721	0.13952	0.50726
GO:2000377	regulation of reactive oxygen species metabolic process	281	16	16.15	679	0.13995	0.11718
GO:0000463	maturation of LSU-rRNA from tricistronic rRNA transcript (SSU-rRNA, 5.8S rRNA, LSU-rRNA)	48	5	2.76	564	0.14008	0.09271
GO:0009416	response to light stimulus	517	33	29.72	3754	0.14275	0.68297
GO:0008206	bile acid metabolic process	60	6	3.45	391	0.1429	0.0584
GO:0060789	hair follicle placode formation	23	3	1.32	3027	0.14308	0.56007
GO:0048012	hepatocyte growth factor receptor signaling pathway	23	3	1.32	3079	0.14308	0.57006
GO:0036342	post-anal tail morphogenesis	23	3	1.32	1485	0.14308	0.27664
GO:0006359	regulation of transcription from RNA polymerase III promoter	42	4	2.41	429	0.14309	0.06643
GO:1903214	regulation of protein targeting to mitochondrion	174	9	10	1444	0.14361	0.26652
GO:0030199	collagen fibril organization	62	6	3.56	4402	0.14481	0.78297
GO:0001510	RNA methylation	103	15	5.92	361	0.14763	0.05302
GO:0046683	response to organophosphorus	228	17	13.11	328	0.14844	0.0469
GO:0046939	nucleotide phosphorylation	180	13	10.35	1189	0.14863	0.21891
GO:0021884	forebrain neuron development	48	5	2.76	299	0.1487	0.04117
GO:0002840	regulation of T cell mediated immune response to tumor cell	23	3	1.32	715	0.14879	0.12531
GO:0031998	regulation of fatty acid beta-oxidation	26	3	1.49	2899	0.14881	0.54078
GO:1990774	tumor necrosis factor secretion	29	3	1.67	716	0.14884	0.12536
GO:2000617	positive regulation of histone H3-K9 acetylation	12	2	0.69	865	0.14884	0.15369
GO:0036155	acylglycerol acyl-chain remodeling	12	2	0.69	3579	0.14884	0.65297
GO:0010579	positive regulation of adenylate cyclase activity involved in G-protein coupled receptor signaling p...	12	2	0.69	3221	0.14884	0.59214
GO:0000055	ribosomal large subunit export from nucleus	12	2	0.69	424	0.14884	0.06539
GO:0044154	histone H3-K14 acetylation	12	2	0.69	2231	0.14884	0.42204
GO:0060215	primitive hemopoiesis	12	2	0.69	528	0.14884	0.08583
GO:1902093	positive regulation of flagellated sperm motility	12	2	0.69	2036	0.14884	0.38732
GO:0031118	rRNA pseudouridine synthesis	12	2	0.69	1455	0.14884	0.26913
GO:0003223	ventricular compact myocardium morphogenesis	12	2	0.69	3958	0.14884	0.71643
GO:0051835	positive regulation of synapse structural plasticity	12	2	0.69	1997	0.14884	0.38231
GO:0015684	ferrous iron transport	12	2	0.69	3578	0.14884	0.65293
GO:0009744	response to sucrose	12	2	0.69	778	0.14884	0.1363
GO:0034127	regulation of MyD88-independent toll-like receptor signaling pathway	12	2	0.69	3624	0.14884	0.66023
GO:0017196	N-terminal peptidyl-methionine acetylation	12	2	0.69	3436	0.14884	0.62817
GO:0008090	retrograde axonal transport	12	2	0.69	114	0.14884	0.00995
GO:0032072	regulation of restriction endodeoxyribonuclease activity	12	2	0.69	719	0.14884	0.12552
GO:0043371	negative regulation of CD4-positive, alpha-beta T cell differentiation	32	3	1.84	721	0.14887	0.12574
GO:1903580	positive regulation of ATP metabolic process	32	3	1.84	2121	0.14887	0.40132
GO:0008088	axo-dendritic transport	69	5	3.97	2526	0.14889	0.47127
GO:0001937	negative regulation of endothelial cell proliferation	49	5	2.82	3356	0.14911	0.61289
GO:0098869	cellular oxidant detoxification	147	13	8.45	175	0.14921	0.01773
GO:0016125	sterol metabolic process	218	9	12.53	1065	0.14961	0.19206
GO:0012501	programmed cell death	3204	181	184.16	990	0.14963	0.17871
GO:0046822	regulation of nucleocytoplasmic transport	370	16	21.27	1025	0.14989	0.18431
GO:0048854	brain morphogenesis	57	5	3.28	283	0.15024	0.03752
GO:0060416	response to growth hormone	77	5	4.43	1902	0.15052	0.36091
GO:0006284	base-excision repair	63	6	3.62	181	0.1528	0.01831
GO:0042493	response to drug	708	44	40.69	4179	0.15377	0.75338
GO:0001822	kidney development	438	24	25.18	1331	0.15448	0.24721
GO:0030097	hemopoiesis	1239	65	71.22	3704	0.15573	0.67484
GO:0001667	ameboidal-type cell migration	598	40	34.37	2266	0.15605	0.42632
GO:2001021	negative regulation of response to DNA damage stimulus	100	10	5.75	414	0.15637	0.06421
GO:0010954	positive regulation of protein processing	35	4	2.01	2260	0.15686	0.42548
GO:0071481	cellular response to X-ray	24	3	1.38	2964	0.15694	0.5496
GO:0051457	maintenance of protein location in nucleus	24	3	1.38	385	0.15694	0.05674
GO:0060736	prostate gland growth	24	3	1.38	2134	0.15694	0.40351
GO:0051899	membrane depolarization	163	10	9.37	931	0.15715	0.16867
GO:0006310	DNA recombination	445	35	25.58	213	0.15812	0.02407
GO:0042104	positive regulation of activated T cell proliferation	50	5	2.87	4672	0.15837	0.81711
GO:0051604	protein maturation	435	33	25	42	0.15959	0.00149
GO:0016053	organic acid biosynthetic process	432	32	24.83	1177	0.16208	0.21569
GO:0002183	cytoplasmic translational initiation	36	6	2.07	623	0.16241	0.10422
GO:0090520	sphingolipid mediated signaling pathway	19	3	1.09	2958	0.16261	0.54879
GO:0018342	protein prenylation	19	3	1.09	1225	0.16261	0.22538
GO:2000058	regulation of protein ubiquitination involved in ubiquitin-dependent protein catabolic process	213	14	12.24	3267	0.16263	0.60021
GO:0016114	terpenoid biosynthetic process	19	2	1.09	875	0.16271	0.15723
GO:0009125	nucleoside monophosphate catabolic process	19	2	1.09	1128	0.16271	0.20441
GO:0006829	zinc II ion transport	39	3	2.24	606	0.16273	0.10109
GO:0072175	epithelial tube formation	214	13	12.3	2758	0.16273	0.5132
GO:0070970	interleukin-2 secretion	25	2	1.44	1157	0.16275	0.21176
GO:0019359	nicotinamide nucleotide biosynthetic process	26	2	1.49	3078	0.16275	0.56986
GO:0055069	zinc ion homeostasis	47	3	2.7	893	0.16277	0.16078
GO:0055024	regulation of cardiac muscle tissue development	109	6	6.27	1371	0.16283	0.25332
GO:0042745	circadian sleep/wake cycle	40	2	2.3	2570	0.16283	0.48022
GO:0032634	interleukin-5 production	41	2	2.36	1052	0.16284	0.18897
GO:0061013	regulation of mRNA catabolic process	53	2	3.05	2881	0.16291	0.53853
GO:0048232	male gamete generation	771	42	44.32	3286	0.16304	0.60337
GO:1903047	mitotic cell cycle process	1616	90	92.89	2558	0.16311	0.4779
GO:0040013	negative regulation of locomotion	450	19	25.87	103	0.16349	0.00865
GO:0006656	phosphatidylcholine biosynthetic process	51	5	2.93	2739	0.16786	0.51024
GO:0006839	mitochondrial transport	483	38	27.76	3936	0.16916	0.71233
GO:0071353	cellular response to interleukin-4	65	6	3.74	1725	0.16935	0.32573
GO:0036462	TRAIL-activated apoptotic signaling pathway	13	2	0.75	626	0.16952	0.10465
GO:0048318	axial mesoderm development	13	2	0.75	1777	0.16952	0.3354
GO:0072488	ammonium transmembrane transport	13	2	0.75	502	0.16952	0.08108
GO:0051026	chiasma assembly	13	2	0.75	1376	0.16952	0.25362
GO:0034982	mitochondrial protein processing	13	2	0.75	78	0.16952	0.00469
GO:0032425	positive regulation of mismatch repair	13	2	0.75	1469	0.16952	0.27276
GO:0035385	Roundabout signaling pathway	13	2	0.75	3903	0.16952	0.70847
GO:0033689	negative regulation of osteoblast proliferation	13	2	0.75	4111	0.16952	0.74213
GO:0086073	bundle of His cell-Purkinje myocyte adhesion involved in cell communication	13	2	0.75	1797	0.16952	0.33913
GO:0016559	peroxisome fission	13	2	0.75	1627	0.16952	0.3066
GO:0039530	MDA-5 signaling pathway	13	2	0.75	3805	0.16952	0.69087
GO:0060242	contact inhibition	13	2	0.75	2509	0.16952	0.46728
GO:0000733	DNA strand renaturation	13	2	0.75	4048	0.16952	0.72899
GO:0006108	malate metabolic process	13	2	0.75	1889	0.16952	0.35827
GO:0019919	peptidyl-arginine methylation, to asymmetrical-dimethyl arginine	13	2	0.75	167	0.16952	0.01689
GO:0002309	T cell proliferation involved in immune response	13	2	0.75	4341	0.16952	0.77596
GO:0090073	positive regulation of protein homodimerization activity	13	2	0.75	3743	0.16952	0.68049
GO:0031584	activation of phospholipase D activity	13	2	0.75	1813	0.16952	0.34505
GO:0090045	positive regulation of deacetylase activity	13	2	0.75	2933	0.16952	0.5451
GO:2000322	regulation of glucocorticoid receptor signaling pathway	13	2	0.75	80	0.16952	0.00518
GO:0097350	neutrophil clearance	13	2	0.75	578	0.16952	0.09561
GO:0034165	positive regulation of toll-like receptor 9 signaling pathway	13	2	0.75	1470	0.16952	0.27276
GO:0061356	regulation of Wnt protein secretion	13	2	0.75	615	0.16952	0.10258
GO:0045199	maintenance of epithelial cell apical/basal polarity	13	2	0.75	263	0.16952	0.03218
GO:0006685	sphingomyelin catabolic process	13	2	0.75	4227	0.16952	0.76116
GO:0017183	peptidyl-diphthamide biosynthetic process from peptidyl-histidine	13	2	0.75	1977	0.16952	0.37851
GO:0090135	actin filament branching	13	2	0.75	2717	0.16952	0.50674
GO:0070857	regulation of bile acid biosynthetic process	13	2	0.75	1815	0.16952	0.34532
GO:0044320	cellular response to leptin stimulus	34	3	1.95	2202	0.16956	0.41562
GO:0010574	regulation of vascular endothelial growth factor production	66	4	3.79	4054	0.1697	0.72966
GO:0007094	mitotic spindle assembly checkpoint	44	7	2.53	738	0.17052	0.12946
GO:0001773	myeloid dendritic cell activation	57	5	3.28	4383	0.17115	0.78125
GO:0031054	pre-miRNA processing	25	3	1.44	1859	0.17119	0.35278
GO:0003198	epithelial to mesenchymal transition involved in endocardial cushion formation	25	3	1.44	2805	0.17119	0.52243
GO:0007597	blood coagulation, intrinsic pathway	25	3	1.44	2456	0.17119	0.45917
GO:0010288	response to lead ion	25	3	1.44	708	0.17119	0.12335
GO:0090305	nucleic acid phosphodiester bond hydrolysis	489	40	28.11	725	0.17183	0.12657
GO:0008152	metabolic process	17955	1146	1032.03	185	0.17199	0.01894
GO:0034198	cellular response to amino acid starvation	38	4	2.18	3152	0.17257	0.58073
GO:0048384	retinoic acid receptor signaling pathway	77	6	4.43	4068	0.17264	0.73288
GO:0000060	protein import into nucleus, translocation	73	5	4.2	2843	0.17285	0.53108
GO:0003407	neural retina development	92	6	5.29	1975	0.17288	0.37816
GO:0008380	RNA splicing	728	39	41.84	3745	0.17493	0.68178
GO:0006953	acute-phase response	93	7	5.35	1937	0.17809	0.36708
GO:0006486	protein glycosylation	458	30	26.33	1431	0.17914	0.2647
GO:0048010	vascular endothelial growth factor receptor signaling pathway	186	12	10.69	4928	0.18325	0.85064
GO:0006110	regulation of glycolytic process	59	5	3.39	235	0.18421	0.02773
GO:0001967	suckling behavior	26	3	1.49	3930	0.18579	0.71163
GO:0006388	tRNA splicing, via endonucleolytic cleavage and ligation	26	3	1.49	813	0.18579	0.14228
GO:1903206	negative regulation of hydrogen peroxide-induced cell death	26	3	1.49	1447	0.18579	0.26727
GO:0003222	ventricular trabecula myocardium morphogenesis	26	3	1.49	4534	0.18579	0.79951
GO:0060047	heart contraction	470	21	27.01	1837	0.18767	0.34945
GO:0043488	regulation of mRNA stability	265	15	15.23	347	0.1879	0.0501
GO:0071482	cellular response to light stimulus	177	19	10.17	133	0.18916	0.01266
GO:0045664	regulation of neuron differentiation	927	39	53.28	2155	0.18981	0.40843
GO:0008535	respiratory chain complex IV assembly	30	5	1.72	2047	0.19023	0.38984
GO:0007127	meiosis I	170	13	9.77	260	0.19024	0.03131
GO:0036336	dendritic cell migration	68	7	3.91	4206	0.19027	0.7575
GO:0010656	negative regulation of muscle cell apoptotic process	45	4	2.59	4151	0.19059	0.74722
GO:0001878	response to yeast	14	2	0.8	3470	0.19063	0.6361
GO:0060023	soft palate development	14	2	0.8	892	0.19063	0.16064
GO:0019348	dolichol metabolic process	14	2	0.8	120	0.19063	0.01113
GO:1904424	regulation of GTP binding	14	2	0.8	2876	0.19063	0.5374
GO:0031017	exocrine pancreas development	14	2	0.8	49	0.19063	0.00204
GO:0030952	establishment or maintenance of cytoskeleton polarity	14	2	0.8	1831	0.19063	0.34696
GO:0032790	ribosome disassembly	14	2	0.8	108	0.19063	0.00913
GO:1903430	negative regulation of cell maturation	14	2	0.8	489	0.19063	0.07855
GO:0035865	cellular response to potassium ion	14	2	0.8	1817	0.19063	0.34536
GO:0051770	positive regulation of nitric-oxide synthase biosynthetic process	14	2	0.8	2941	0.19063	0.54641
GO:0060586	multicellular organismal iron ion homeostasis	14	2	0.8	2004	0.19063	0.3827
GO:0070099	regulation of chemokine-mediated signaling pathway	14	2	0.8	4629	0.19063	0.81194
GO:0006273	lagging strand elongation	14	2	0.8	1883	0.19063	0.35693
GO:0009404	toxin metabolic process	14	2	0.8	2615	0.19063	0.48951
GO:0042415	norepinephrine metabolic process	14	2	0.8	646	0.19063	0.10959
GO:1902177	positive regulation of oxidative stress-induced intrinsic apoptotic signaling pathway	14	2	0.8	3915	0.19063	0.7096
GO:0006526	arginine biosynthetic process	14	2	0.8	3366	0.19063	0.6161
GO:0046689	response to mercury ion	14	2	0.8	2070	0.19063	0.39439
GO:0061439	kidney vasculature morphogenesis	14	2	0.8	718	0.19063	0.12548
GO:0034201	response to oleic acid	14	2	0.8	1824	0.19063	0.34632
GO:0030422	production of siRNA involved in RNA interference	14	2	0.8	3085	0.19063	0.571
GO:0006995	cellular response to nitrogen starvation	14	2	0.8	1075	0.19063	0.19404
GO:0050703	interleukin-1 alpha secretion	14	2	0.8	2957	0.19063	0.54878
GO:2000510	positive regulation of dendritic cell chemotaxis	14	2	0.8	4322	0.19063	0.77302
GO:0036465	synaptic vesicle recycling	49	4	2.82	1862	0.19063	0.35353
GO:0003158	endothelium development	183	11	10.52	1062	0.19077	0.19123
GO:0009611	response to wounding	1098	53	63.11	3498	0.19272	0.6407
GO:0006631	fatty acid metabolic process	549	43	31.56	3891	0.19416	0.70541
GO:0097503	sialylation	40	4	2.3	1748	0.19601	0.32958
GO:0042572	retinol metabolic process	40	4	2.3	232	0.19601	0.02714
GO:0051259	protein oligomerization	744	53	42.76	1479	0.19613	0.27587
GO:0051170	nuclear import	512	27	29.43	26	0.1973	0.0002
GO:0033574	response to testosterone	54	5	3.1	4306	0.19758	0.77039
GO:0001975	response to amphetamine	54	5	3.1	3821	0.19758	0.69343
GO:0051881	regulation of mitochondrial membrane potential	95	7	5.46	670	0.19771	0.11504
GO:0010212	response to ionizing radiation	280	21	16.09	1515	0.19851	0.28319
GO:0030224	monocyte differentiation	52	5	2.99	3946	0.20055	0.71473
GO:0006488	dolichol-linked oligosaccharide biosynthetic process	40	4	2.3	18	0.20063	3.2e-05
GO:0055003	cardiac myofibril assembly	27	3	1.55	1056	0.2007	0.18948
GO:0007026	negative regulation of microtubule depolymerization	27	3	1.55	1856	0.2007	0.35252
GO:0033630	positive regulation of cell adhesion mediated by integrin	27	3	1.55	3596	0.2007	0.65539
GO:0007435	salivary gland morphogenesis	65	5	3.74	744	0.20075	0.13109
GO:0010039	response to iron ion	57	7	3.28	691	0.20742	0.119
GO:0010811	positive regulation of cell-substrate adhesion	196	14	11.27	860	0.20754	0.1518
GO:0042398	cellular modified amino acid biosynthetic process	67	6	3.85	1433	0.20792	0.26491
GO:0042278	purine nucleoside metabolic process	596	57	34.26	1820	0.20805	0.34576
GO:0033962	cytoplasmic mRNA processing body assembly	41	4	2.36	1755	0.20808	0.33032
GO:0046835	carbohydrate phosphorylation	41	4	2.36	2992	0.20808	0.55391
GO:0045727	positive regulation of translation	169	13	9.71	1526	0.20863	0.28507
GO:0006303	double-strand break repair via nonhomologous end joining	114	9	6.55	2845	0.20907	0.53118
GO:0051081	nuclear envelope disassembly	75	10	4.31	1308	0.21024	0.24349
GO:0033014	tetrapyrrole biosynthetic process	43	8	2.47	3346	0.21026	0.61051
GO:0046501	protoporphyrinogen IX metabolic process	19	5	1.09	1769	0.21046	0.33282
GO:0009162	deoxyribonucleoside monophosphate metabolic process	18	4	1.03	410	0.21058	0.0628
GO:2000104	negative regulation of DNA-dependent DNA replication	42	5	2.41	784	0.21062	0.13718
GO:0009069	serine family amino acid metabolic process	83	7	4.77	1099	0.21067	0.19948
GO:0018202	peptidyl-histidine modification	17	3	0.98	368	0.21069	0.05432
GO:2000425	regulation of apoptotic cell clearance	14	2	0.8	251	0.2108	0.02976
GO:0010573	vascular endothelial growth factor production	70	5	4.02	2566	0.21083	0.47882
GO:0051583	dopamine uptake involved in synaptic transmission	21	2	1.21	1176	0.21085	0.21565
GO:0002718	regulation of cytokine production involved in immune response	93	6	5.35	3281	0.21087	0.60223
GO:0039529	RIG-I signaling pathway	27	2	1.55	4008	0.21089	0.72354
GO:0006760	folic acid-containing compound metabolic process	49	3	2.82	759	0.21092	0.13305
GO:1901984	negative regulation of protein acetylation	35	2	2.01	898	0.21095	0.16156
GO:0021511	spinal cord patterning	37	2	2.13	743	0.21096	0.13107
GO:0071624	positive regulation of granulocyte chemotaxis	38	2	2.18	3266	0.21097	0.60003
GO:0032616	interleukin-13 production	41	2	2.36	1863	0.21099	0.35405
GO:1903557	positive regulation of tumor necrosis factor superfamily cytokine production	102	5	5.86	3593	0.21105	0.65453
GO:0046425	regulation of JAK-STAT cascade	225	12	12.93	2993	0.21106	0.55395
GO:0038094	Fc-gamma receptor signaling pathway	149	7	8.56	2396	0.21114	0.44925
GO:0061097	regulation of protein tyrosine kinase activity	123	5	7.07	3769	0.21121	0.6861
GO:0034340	response to type I interferon	142	3	8.16	3845	0.21159	0.69726
GO:0032872	regulation of stress-activated MAPK cascade	361	24	20.75	1400	0.21161	0.25908
GO:0031167	rRNA methylation	32	4	1.84	280	0.21185	0.03717
GO:0098655	cation transmembrane transport	1145	72	65.81	1278	0.21185	0.23517
GO:0061549	sympathetic ganglion development	15	2	0.86	2168	0.21206	0.40998
GO:0061626	pharyngeal arch artery morphogenesis	15	2	0.86	4055	0.21206	0.7303
GO:0045924	regulation of female receptivity	15	2	0.86	2247	0.21206	0.42425
GO:0035457	cellular response to interferon-alpha	15	2	0.86	4433	0.21206	0.78754
GO:0071447	cellular response to hydroperoxide	15	2	0.86	1406	0.21206	0.26024
GO:0035280	miRNA loading onto RISC involved in gene silencing by miRNA	15	2	0.86	1900	0.21206	0.3608
GO:0035711	T-helper 1 cell activation	15	2	0.86	2043	0.21206	0.38911
GO:0006228	UTP biosynthetic process	15	2	0.86	187	0.21206	0.01925
GO:0017055	negative regulation of RNA polymerase II transcriptional preinitiation complex assembly	15	2	0.86	376	0.21206	0.05519
GO:0022417	protein maturation by protein folding	15	2	0.86	4284	0.21206	0.76865
GO:0048069	eye pigmentation	15	2	0.86	4342	0.21206	0.776
GO:0061299	retina vasculature morphogenesis in camera-type eye	15	2	0.86	2724	0.21206	0.5077
GO:0010269	response to selenium ion	15	2	0.86	236	0.21206	0.02774
GO:0050716	positive regulation of interleukin-1 secretion	48	3	2.76	378	0.21225	0.05537
GO:0046622	positive regulation of organ growth	64	3	3.68	1832	0.21244	0.3471
GO:0006665	sphingolipid metabolic process	246	13	14.14	2408	0.21254	0.45121
GO:0050707	regulation of cytokine secretion	265	14	15.23	1550	0.21256	0.29013
GO:0006820	anion transport	743	30	42.71	891	0.21258	0.16034
GO:0003279	cardiac septum development	163	8	9.37	1740	0.21258	0.32782
GO:0051169	nuclear transport	833	45	47.88	563	0.21292	0.09263
GO:0032481	positive regulation of type I interferon production	127	10	7.3	2349	0.21338	0.43993
GO:0043066	negative regulation of apoptotic process	1472	87	84.61	2223	0.21457	0.42098
GO:0015992	proton transport	242	32	13.91	1312	0.21483	0.24482
GO:0001755	neural crest cell migration	95	9	5.46	4144	0.21556	0.74628
GO:0007494	midgut development	28	3	1.61	540	0.21588	0.08838
GO:0043162	ubiquitin-dependent protein catabolic process via the multivesicular body sorting pathway	28	3	1.61	2404	0.21588	0.45064
GO:0036066	protein O-linked fucosylation	28	3	1.61	444	0.21588	0.07035
GO:0061436	establishment of skin barrier	28	3	1.61	3774	0.21588	0.68645
GO:0043981	histone H4-K5 acetylation	28	3	1.61	1757	0.21588	0.33036
GO:0043982	histone H4-K8 acetylation	28	3	1.61	1758	0.21588	0.33036
GO:0019369	arachidonic acid metabolic process	67	5	3.85	3193	0.21594	0.58888
GO:0048585	negative regulation of response to stimulus	2302	111	132.32	4491	0.21717	0.79423
GO:0033673	negative regulation of kinase activity	440	20	25.29	511	0.21774	0.08186
GO:2000243	positive regulation of reproductive process	70	6	4.02	2299	0.22023	0.43279
GO:0000729	DNA double-strand break processing	42	4	2.41	3756	0.22036	0.68341
GO:0031954	positive regulation of protein autophosphorylation	42	4	2.41	4964	0.22036	0.855
GO:0048747	muscle fiber development	96	6	5.52	1294	0.22073	0.23886
GO:1900034	regulation of cellular response to heat	147	11	8.45	3326	0.22547	0.60803
GO:0045787	positive regulation of cell cycle	608	40	34.95	2809	0.22761	0.5231
GO:0006874	cellular calcium ion homeostasis	631	27	36.27	3208	0.22978	0.59086
GO:0002323	natural killer cell activation involved in immune response	39	4	2.24	700	0.23116	0.12121
GO:0043687	post-translational protein modification	65	10	3.74	1484	0.23118	0.27654
GO:0061003	positive regulation of dendritic spine morphogenesis	29	3	1.67	2130	0.23129	0.40272
GO:0019915	lipid storage	100	5	5.75	2176	0.23189	0.411
GO:0045648	positive regulation of erythrocyte differentiation	43	4	2.47	1762	0.23282	0.33128
GO:0006903	vesicle targeting	139	12	7.99	1384	0.23304	0.25615
GO:0021799	cerebral cortex radially oriented cell migration	51	5	2.93	3550	0.23348	0.64912
GO:0006071	glycerol metabolic process	26	3	1.49	1572	0.2336	0.29552
GO:0009226	nucleotide-sugar biosynthetic process	31	3	1.78	209	0.23367	0.02263
GO:1901897	regulation of relaxation of cardiac muscle	16	2	0.92	2273	0.2337	0.42767
GO:0060027	convergent extension involved in gastrulation	16	2	0.92	829	0.2337	0.14675
GO:1901678	iron coordination entity transport	16	2	0.92	1520	0.2337	0.28443
GO:0000012	single strand break repair	16	2	0.92	1361	0.2337	0.25162
GO:0003376	sphingosine-1-phosphate signaling pathway	16	2	0.92	1453	0.2337	0.26865
GO:0032525	somite rostral/caudal axis specification	16	2	0.92	620	0.2337	0.10339
GO:0060732	positive regulation of inositol phosphate biosynthetic process	16	2	0.92	1987	0.2337	0.38077
GO:0015871	choline transport	16	2	0.92	3491	0.2337	0.63898
GO:0060501	positive regulation of epithelial cell proliferation involved in lung morphogenesis	16	2	0.92	4594	0.2337	0.80763
GO:0051561	positive regulation of mitochondrial calcium ion concentration	16	2	0.92	2835	0.2337	0.52896
GO:0018344	protein geranylgeranylation	16	2	0.92	200	0.2337	0.02118
GO:0034379	very-low-density lipoprotein particle assembly	16	2	0.92	4251	0.2337	0.76455
GO:0034497	protein localization to pre-autophagosomal structure	16	2	0.92	3176	0.2337	0.58599
GO:0033353	S-adenosylmethionine cycle	16	2	0.92	2865	0.2337	0.5355
GO:0014842	regulation of skeletal muscle satellite cell proliferation	16	2	0.92	1664	0.2337	0.31407
GO:0008406	gonad development	339	20	19.49	1834	0.23383	0.34759
GO:0009620	response to fungus	62	4	3.56	1262	0.23384	0.23169
GO:1903363	negative regulation of cellular protein catabolic process	82	5	4.71	1425	0.23388	0.26379
GO:0099504	synaptic vesicle cycle	170	10	9.77	3611	0.23389	0.6587
GO:0033619	membrane protein proteolysis	87	4	5	1010	0.23417	0.18179
GO:0070509	calcium ion import	269	13	15.46	3364	0.23421	0.61541
GO:0045446	endothelial cell differentiation	147	7	8.45	4166	0.23427	0.75059
GO:0044702	single organism reproductive process	1956	98	112.43	4126	0.23745	0.74453
GO:0043170	macromolecule metabolic process	14909	911	856.95	3044	0.23852	0.56248
GO:0043388	positive regulation of DNA binding	79	8	4.54	1599	0.23898	0.30216
GO:0051017	actin filament bundle assembly	215	13	12.36	4575	0.24012	0.80465
GO:0006805	xenobiotic metabolic process	157	12	9.02	735	0.24169	0.12887
GO:0007566	embryo implantation	88	7	5.06	896	0.24189	0.16096
GO:0008033	tRNA processing	175	22	10.06	638	0.24364	0.10843
GO:0034614	cellular response to reactive oxygen species	220	21	12.65	2199	0.24473	0.41445
GO:0051602	response to electrical stimulus	61	6	3.51	3636	0.24507	0.66294
GO:0046487	glyoxylate metabolic process	44	4	2.53	300	0.24544	0.04186
GO:0007095	mitotic G2 DNA damage checkpoint	30	3	1.72	3368	0.24688	0.61631
GO:0032727	positive regulation of interferon-alpha production	30	3	1.72	2546	0.24688	0.4751
GO:0046339	diacylglycerol metabolic process	30	3	1.72	4234	0.24688	0.76221
GO:0051898	negative regulation of protein kinase B signaling	59	5	3.39	1449	0.2506	0.26772
GO:0006418	tRNA aminoacylation for protein translation	59	5	3.39	15	0.2506	8.3e-06
GO:0006355	regulation of transcription, DNA-templated	5809	277	333.89	2538	0.25115	0.47411
GO:0071346	cellular response to interferon-gamma	242	11	13.91	2065	0.25309	0.39308
GO:0031639	plasminogen activation	35	4	2.01	1988	0.25523	0.38084
GO:0035195	gene silencing by miRNA	107	8	6.15	2112	0.25526	0.40001
GO:0006448	regulation of translational elongation	41	4	2.36	909	0.25531	0.16442
GO:0050665	hydrogen peroxide biosynthetic process	17	2	0.98	5139	0.25546	0.87621
GO:0008215	spermine metabolic process	17	2	0.98	97	0.25546	0.00768
GO:0071318	cellular response to ATP	17	2	0.98	3482	0.25546	0.63834
GO:0071499	cellular response to laminar fluid shear stress	17	2	0.98	4109	0.25546	0.74191
GO:0051177	meiotic sister chromatid cohesion	17	2	0.98	4118	0.25546	0.74282
GO:0043353	enucleate erythrocyte differentiation	17	2	0.98	4866	0.25546	0.84401
GO:0051292	nuclear pore complex assembly	17	2	0.98	5155	0.25546	0.87855
GO:0071257	cellular response to electrical stimulus	17	2	0.98	3790	0.25546	0.68811
GO:0051256	mitotic spindle midzone assembly	17	2	0.98	2237	0.25546	0.42267
GO:0060699	regulation of endoribonuclease activity	17	2	0.98	202	0.25546	0.02171
GO:0042416	dopamine biosynthetic process	17	2	0.98	4094	0.25546	0.73783
GO:0070475	rRNA base methylation	17	2	0.98	27	0.25546	0.00022
GO:1901298	regulation of hydrogen peroxide-mediated programmed cell death	17	2	0.98	2143	0.25546	0.40518
GO:0016052	carbohydrate catabolic process	259	19	14.89	2353	0.25571	0.44078
GO:0071428	rRNA-containing ribonucleoprotein complex export from nucleus	33	5	1.9	3913	0.25587	0.7093
GO:0021885	forebrain cell migration	109	9	6.27	2852	0.25592	0.53279
GO:0098815	modulation of excitatory postsynaptic potential	65	6	3.74	2732	0.25599	0.50935
GO:0072431	signal transduction involved in mitotic G1 DNA damage checkpoint	138	10	7.93	3897	0.25602	0.70699
GO:0010421	hydrogen peroxide-mediated programmed cell death	22	3	1.26	3771	0.25607	0.68618
GO:0061008	hepaticobiliary system development	215	14	12.36	4535	0.25608	0.79953
GO:0045619	regulation of lymphocyte differentiation	236	15	13.56	2289	0.25611	0.43098
GO:0021564	vagus nerve development	16	2	0.92	308	0.25616	0.04349
GO:0001840	neural plate development	21	2	1.21	3690	0.2562	0.67228
GO:0040034	regulation of development, heterochronic	22	2	1.26	149	0.25621	0.01476
GO:0051797	regulation of hair follicle development	23	2	1.32	452	0.25622	0.072
GO:0042133	neurotransmitter metabolic process	53	3	3.05	3813	0.25633	0.69204
GO:0001959	regulation of cytokine-mediated signaling pathway	239	11	13.74	957	0.25637	0.17379
GO:0061333	renal tubule morphogenesis	118	6	6.78	3070	0.25644	0.56809
GO:0030888	regulation of B cell proliferation	90	4	5.17	3793	0.25649	0.6884
GO:0006171	cAMP biosynthetic process	193	9	11.09	1132	0.25663	0.20563
GO:0090087	regulation of peptide transport	339	16	19.49	337	0.25684	0.04915
GO:0061351	neural precursor cell proliferation	215	7	12.36	3409	0.257	0.62248
GO:0030323	respiratory tube development	314	10	18.05	3721	0.25752	0.67688
GO:0006325	chromatin organization	1204	37	69.2	1439	0.25752	0.26607
GO:0050804	modulation of synaptic transmission	499	19	28.68	4446	0.25807	0.78849
GO:0031344	regulation of cell projection organization	895	39	51.44	3435	0.25821	0.62772
GO:0071480	cellular response to gamma radiation	45	4	2.59	3131	0.25821	0.57748
GO:0007628	adult walking behavior	45	4	2.59	515	0.25821	0.08236
GO:0000209	protein polyubiquitination	484	32	27.82	550	0.25864	0.09032
GO:0071230	cellular response to amino acid stimulus	90	7	5.17	2364	0.25951	0.44361
GO:0045740	positive regulation of DNA replication	112	8	6.44	1113	0.25965	0.20192
GO:0043524	negative regulation of neuron apoptotic process	276	19	15.86	5146	0.26022	0.87739
GO:0043542	endothelial cell migration	285	21	16.38	4770	0.26155	0.83002
GO:0071158	positive regulation of cell cycle arrest	164	12	9.43	3641	0.26221	0.66433
GO:0010823	negative regulation of mitochondrion organization	82	6	4.71	703	0.26261	0.12141
GO:1902236	negative regulation of endoplasmic reticulum stress-induced intrinsic apoptotic signaling pathway	31	3	1.78	1495	0.26264	0.27901
GO:0008631	intrinsic apoptotic signaling pathway in response to oxidative stress	91	5	5.23	4757	0.2631	0.8283
GO:0030901	midbrain development	149	15	8.56	2489	0.26916	0.46384
GO:0005978	glycogen biosynthetic process	91	9	5.23	293	0.27018	0.04021
GO:0007254	JNK cascade	350	23	20.12	484	0.27052	0.07789
GO:0001702	gastrulation with mouth forming second	46	4	2.64	1021	0.27111	0.18375
GO:0042100	B cell proliferation	151	9	8.68	683	0.27325	0.11739
GO:0032868	response to insulin	416	20	23.91	1573	0.27408	0.29583
GO:0043534	blood vessel endothelial cell migration	146	13	8.39	1685	0.27632	0.31729
GO:0021545	cranial nerve development	80	8	4.6	1390	0.27663	0.25756
GO:0060487	lung epithelial cell differentiation	41	4	2.36	4423	0.27708	0.7862
GO:0034219	carbohydrate transmembrane transport	44	4	2.53	3538	0.27712	0.64792
GO:1990778	protein localization to cell periphery	378	23	21.73	138	0.27717	0.01295
GO:0010831	positive regulation of myotube differentiation	52	4	2.99	1471	0.27724	0.27383
GO:0071360	cellular response to exogenous dsRNA	18	2	1.03	2460	0.27725	0.45944
GO:0000185	activation of MAPKKK activity	18	2	1.03	1850	0.27725	0.35139
GO:1904871	positive regulation of protein localization to Cajal body	18	2	1.03	191	0.27725	0.01964
GO:0048664	neuron fate determination	18	2	1.03	4902	0.27725	0.8474
GO:2001200	positive regulation of dendritic cell differentiation	18	2	1.03	3858	0.27725	0.69977
GO:0060684	epithelial-mesenchymal cell signaling	18	2	1.03	1008	0.27725	0.18143
GO:0006851	mitochondrial calcium ion transport	18	2	1.03	1789	0.27725	0.33775
GO:0009223	pyrimidine deoxyribonucleotide catabolic process	18	2	1.03	525	0.27725	0.08511
GO:0009215	purine deoxyribonucleoside triphosphate metabolic process	18	2	1.03	3142	0.27725	0.57894
GO:0042711	maternal behavior	18	2	1.03	5100	0.27725	0.87113
GO:0033762	response to glucagon	76	5	4.37	2885	0.27733	0.53884
GO:0051693	actin filament capping	60	4	3.45	3448	0.27735	0.63083
GO:0014075	response to amine	86	8	4.94	1398	0.27788	0.259
GO:0044272	sulfur compound biosynthetic process	334	21	19.2	1105	0.27829	0.20013
GO:0010971	positive regulation of G2/M transition of mitotic cell cycle	32	3	1.84	505	0.27851	0.08113
GO:1900026	positive regulation of substrate adhesion-dependent cell spreading	77	6	4.43	3438	0.28133	0.62879
GO:0070979	protein K11-linked ubiquitination	77	6	4.43	2324	0.28133	0.43703
GO:0006400	tRNA modification	108	14	6.21	1914	0.28155	0.3632
GO:0006302	double-strand break repair	343	26	19.72	1079	0.28175	0.19472
GO:0040008	regulation of growth	1090	47	62.65	794	0.28351	0.13869
GO:0010557	positive regulation of macromolecule biosynthetic process	2716	133	156.11	1756	0.28404	0.33034
GO:0019432	triglyceride biosynthetic process	77	5	4.43	4739	0.2844	0.82616
GO:0060395	SMAD protein signal transduction	78	6	4.48	1722	0.29138	0.3248
GO:1901575	organic substance catabolic process	3447	284	198.13	2901	0.2933	0.54086
GO:0006082	organic acid metabolic process	1540	118	88.52	95	0.29389	0.0074
GO:0007020	microtubule nucleation	33	3	1.9	3418	0.29447	0.62382
GO:0047497	mitochondrion transport along microtubule	33	3	1.9	697	0.29447	0.12098
GO:0007250	activation of NF-kappaB-inducing kinase activity	33	3	1.9	4891	0.29447	0.84661
GO:0043153	entrainment of circadian clock by photoperiod	33	3	1.9	2073	0.29447	0.39473
GO:0051968	positive regulation of synaptic transmission, glutamatergic	33	3	1.9	2599	0.29447	0.48578
GO:0030150	protein import into mitochondrial matrix	33	3	1.9	1055	0.29447	0.18918
GO:0070207	protein homotrimerization	33	3	1.9	3574	0.29447	0.65273
GO:0014850	response to muscle activity	33	3	1.9	3908	0.29447	0.70904
GO:0061621	canonical glycolysis	63	5	3.62	301	0.29527	0.0419
GO:0035176	social behavior	94	7	5.4	471	0.29577	0.07608
GO:0043280	positive regulation of cysteine-type endopeptidase activity involved in apoptotic process	218	12	12.53	4915	0.29615	0.84926
GO:0032874	positive regulation of stress-activated MAPK cascade	250	21	14.37	1050	0.29745	0.18853
GO:1903509	liposaccharide metabolic process	188	20	10.81	2357	0.29755	0.44169
GO:0009247	glycolipid biosynthetic process	102	15	5.86	4568	0.29756	0.80414
GO:0042594	response to starvation	230	12	13.22	3716	0.29822	0.67625
GO:0070525	tRNA threonylcarbamoyladenosine metabolic process	24	6	1.38	732	0.29832	0.12741
GO:0019319	hexose biosynthetic process	157	13	9.02	1350	0.29842	0.24931
GO:0000038	very long-chain fatty acid metabolic process	43	5	2.47	125	0.29856	0.01167
GO:0044275	cellular carbohydrate catabolic process	80	7	4.6	556	0.29869	0.09096
GO:0030042	actin filament depolymerization	84	7	4.83	4222	0.29872	0.76005
GO:0060633	negative regulation of transcription initiation from RNA polymerase II promoter	21	3	1.21	1536	0.29879	0.28718
GO:0044321	response to leptin	40	4	2.3	4156	0.2988	0.74808
GO:0018195	peptidyl-arginine modification	30	3	1.72	1243	0.29887	0.22867
GO:0060143	positive regulation of syncytium formation by plasma membrane fusion	34	3	1.95	4040	0.29891	0.72818
GO:0010935	regulation of macrophage cytokine production	17	2	0.98	1430	0.29892	0.26446
GO:0007099	centriole replication	52	4	2.99	3753	0.29897	0.68265
GO:0015669	gas transport	24	2	1.38	1543	0.29898	0.2888
GO:0072524	pyridine-containing compound metabolic process	233	14	13.39	210	0.29898	0.02368
GO:0008354	germ cell migration	19	2	1.09	4155	0.29899	0.74806
GO:0045653	negative regulation of megakaryocyte differentiation	19	2	1.09	483	0.29899	0.07773
GO:0033234	negative regulation of protein sumoylation	19	2	1.09	1140	0.29899	0.20821
GO:0043097	pyrimidine nucleoside salvage	19	2	1.09	1387	0.29899	0.25672
GO:0003334	keratinocyte development	19	2	1.09	1912	0.29899	0.36257
GO:0051106	positive regulation of DNA ligation	19	2	1.09	4232	0.29899	0.76211
GO:0000244	spliceosomal tri-snRNP complex assembly	19	2	1.09	360	0.29899	0.05298
GO:0051782	negative regulation of cell division	19	2	1.09	4101	0.29899	0.73935
GO:0051599	response to hydrostatic pressure	19	2	1.09	323	0.29899	0.04594
GO:0042364	water-soluble vitamin biosynthetic process	19	2	1.09	1269	0.29899	0.23352
GO:0051657	maintenance of organelle location	19	2	1.09	4196	0.29899	0.75686
GO:0042407	cristae formation	19	2	1.09	104	0.29899	0.00889
GO:0010155	regulation of proton transport	19	2	1.09	3270	0.29899	0.60096
GO:0032099	negative regulation of appetite	19	2	1.09	266	0.29899	0.03311
GO:0032800	receptor biosynthetic process	44	3	2.53	2565	0.29901	0.47871
GO:0046040	IMP metabolic process	27	2	1.55	3991	0.29901	0.72138
GO:0034698	response to gonadotropin	36	2	2.07	872	0.2991	0.15657
GO:0048568	embryonic organ development	700	28	40.23	5216	0.29913	0.88486
GO:0044091	membrane biogenesis	57	3	3.28	2582	0.29913	0.48322
GO:0071331	cellular response to hexose stimulus	181	10	10.4	2474	0.29915	0.46153
GO:0021517	ventral spinal cord development	62	3	3.56	888	0.29918	0.16011
GO:0032964	collagen biosynthetic process	51	2	2.93	894	0.29924	0.16084
GO:0010522	regulation of calcium ion transport into cytosol	156	8	8.97	4832	0.29925	0.83944
GO:0051350	negative regulation of lyase activity	57	2	3.28	2510	0.2993	0.46739
GO:0051489	regulation of filopodium assembly	60	3	3.45	5040	0.29936	0.86448
GO:0043266	regulation of potassium ion transport	132	5	7.59	3699	0.29952	0.67432
GO:1903038	negative regulation of leukocyte cell-cell adhesion	175	9	10.06	2778	0.29952	0.51873
GO:0032147	activation of protein kinase activity	530	30	30.46	4293	0.29962	0.76918
GO:0051436	negative regulation of ubiquitin-protein ligase activity involved in mitotic cell cycle	158	11	9.08	369	0.30004	0.05437
GO:0072657	protein localization to membrane	1167	138	67.08	557	0.30006	0.09112
GO:0007599	hemostasis	588	24	33.8	427	0.30075	0.06607
GO:0007608	sensory perception of smell	469	17	26.96	1156	0.30184	0.21174
GO:0009719	response to endogenous stimulus	2642	120	151.86	1219	0.30494	0.22473
GO:0010595	positive regulation of endothelial cell migration	113	9	6.5	3814	0.30609	0.69206
GO:0014911	positive regulation of smooth muscle cell migration	64	5	3.68	3124	0.30665	0.57702
GO:0032689	negative regulation of interferon-gamma production	64	5	3.68	5282	0.30665	0.89128
GO:0014068	positive regulation of phosphatidylinositol 3-kinase signaling	127	9	7.3	5276	0.30761	0.89073
GO:0042474	middle ear morphogenesis	34	3	1.95	2908	0.31048	0.54179
GO:0034138	toll-like receptor 3 signaling pathway	34	3	1.95	3311	0.31048	0.60599
GO:0055093	response to hyperoxia	34	3	1.95	3092	0.31048	0.57173
GO:2001234	negative regulation of apoptotic signaling pathway	365	19	20.98	1678	0.31156	0.31641
GO:0031668	cellular response to extracellular stimulus	313	13	17.99	4793	0.31298	0.83414
GO:0006091	generation of precursor metabolites and energy	605	56	34.77	709	0.31483	0.12362
GO:0016311	dephosphorylation	759	29	43.63	1821	0.31709	0.34578
GO:0071229	cellular response to acid chemical	267	20	15.35	934	0.31956	0.16925
GO:0043586	tongue development	37	5	2.13	742	0.32006	0.13091
GO:0045063	T-helper 1 cell differentiation	37	3	2.13	2808	0.32062	0.52289
GO:0048387	negative regulation of retinoic acid receptor signaling pathway	20	2	1.15	4276	0.32063	0.76774
GO:0007097	nuclear migration	20	2	1.15	3630	0.32063	0.66107
GO:0002934	desmosome organization	20	2	1.15	1069	0.32063	0.19253
GO:0007342	fusion of sperm to egg plasma membrane	20	2	1.15	3770	0.32063	0.68611
GO:0007171	activation of transmembrane receptor protein tyrosine kinase activity	20	2	1.15	3547	0.32063	0.64894
GO:0071276	cellular response to cadmium ion	20	2	1.15	4450	0.32063	0.78958
GO:0060765	regulation of androgen receptor signaling pathway	42	3	2.41	1339	0.3207	0.24814
GO:0060122	inner ear receptor stereocilium organization	45	3	2.59	411	0.32075	0.06357
GO:0000082	G1/S transition of mitotic cell cycle	456	30	26.21	1586	0.32124	0.29951
GO:0001952	regulation of cell-matrix adhesion	180	8	10.35	4230	0.32153	0.76172
GO:0030182	neuron differentiation	2035	91	116.97	2006	0.32192	0.38294
GO:0006959	humoral immune response	256	16	14.71	4527	0.32196	0.79849
GO:0031047	gene silencing by RNA	243	17	13.97	246	0.32272	0.02956
GO:0006470	protein dephosphorylation	489	18	28.11	3464	0.32357	0.63534
GO:0007616	long-term memory	50	4	2.87	4860	0.32359	0.84312
GO:1902230	negative regulation of intrinsic apoptotic signaling pathway in response to DNA damage	50	4	2.87	2481	0.32359	0.46243
GO:0048025	negative regulation of mRNA splicing, via spliceosome	50	4	2.87	5720	0.32359	0.93438
GO:0010038	response to metal ion	525	38	30.18	2654	0.32398	0.49595
GO:0019058	viral life cycle	1093	141	62.82	4098	0.32439	0.73913
GO:0000956	nuclear-transcribed mRNA catabolic process	666	117	38.28	3696	0.32453	0.6732
GO:0010631	epithelial cell migration	415	27	23.85	3283	0.32572	0.60308
GO:0008283	cell proliferation	3319	164	190.77	2138	0.32587	0.40402
GO:0051443	positive regulation of ubiquitin-protein transferase activity	213	14	12.24	1421	0.32623	0.26355
GO:0002092	positive regulation of receptor internalization	35	3	2.01	2988	0.32651	0.55311
GO:0006611	protein export from nucleus	95	4	5.46	51	0.3274	0.00216
GO:0009408	response to heat	289	18	16.61	1328	0.33216	0.24693
GO:0009749	response to glucose	289	17	16.61	1811	0.33344	0.34403
GO:0006687	glycosphingolipid metabolic process	116	8	6.67	5324	0.33673	0.8963
GO:0007339	binding of sperm to zona pellucida	51	4	2.93	570	0.33685	0.09385
GO:0031098	stress-activated protein kinase signaling cascade	460	30	26.44	3758	0.33873	0.68398
GO:0021783	preganglionic parasympathetic fiber development	32	4	1.84	4006	0.33899	0.72342
GO:0009649	entrainment of circadian clock	40	4	2.3	3203	0.33908	0.59042
GO:0043628	ncRNA 3'-end processing	30	3	1.72	568	0.33916	0.09332
GO:0010755	regulation of plasminogen activation	18	2	1.03	549	0.33921	0.09015
GO:0090313	regulation of protein targeting to membrane	53	4	3.05	2944	0.33921	0.54664
GO:0035358	regulation of peroxisome proliferator activated receptor signaling pathway	19	2	1.09	1744	0.33922	0.32889
GO:0061005	cell differentiation involved in kidney development	90	6	5.17	1180	0.33924	0.21651
GO:0035745	T-helper 2 cell cytokine production	22	2	1.26	4386	0.33925	0.78148
GO:0003143	embryonic heart tube morphogenesis	97	6	5.58	967	0.33931	0.17526
GO:1902742	apoptotic process involved in development	54	3	3.1	1913	0.33941	0.36308
GO:0009913	epidermal cell differentiation	291	16	16.73	4709	0.33952	0.82208
GO:0046545	development of primary female sexual characteristics	156	8	8.97	4507	0.33957	0.796
GO:0003170	heart valve development	70	3	4.02	1508	0.33958	0.28134
GO:1900372	negative regulation of purine nucleotide biosynthetic process	76	2	4.37	3056	0.33982	0.56471
GO:0043279	response to alkaloid	237	10	13.62	2032	0.34006	0.38683
GO:0034103	regulation of tissue remodeling	119	3	6.84	136	0.34009	0.01281
GO:0006821	chloride transport	174	6	10	408	0.34012	0.06227
GO:0010862	positive regulation of pathway-restricted SMAD protein phosphorylation	67	5	3.85	3747	0.34111	0.68191
GO:0086091	regulation of heart rate by cardiac conduction	67	5	3.85	3725	0.34111	0.67776
GO:0048536	spleen development	67	5	3.85	4867	0.34111	0.84417
GO:0046474	glycerophospholipid biosynthetic process	301	21	17.3	273	0.34124	0.03557
GO:0071498	cellular response to fluid shear stress	38	4	2.18	4247	0.3418	0.76402
GO:1901617	organic hydroxy compound biosynthetic process	269	17	15.46	817	0.34188	0.14324
GO:2000826	regulation of heart morphogenesis	48	4	2.76	3359	0.34197	0.61312
GO:0030836	positive regulation of actin filament depolymerization	21	2	1.21	2067	0.3421	0.3937
GO:0045630	positive regulation of T-helper 2 cell differentiation	21	2	1.21	5724	0.3421	0.93452
GO:0060081	membrane hyperpolarization	21	2	1.21	1249	0.3421	0.22919
GO:0019321	pentose metabolic process	21	2	1.21	2352	0.3421	0.44072
GO:0000050	urea cycle	21	2	1.21	2646	0.3421	0.49521
GO:0000052	citrulline metabolic process	21	2	1.21	1713	0.3421	0.32307
GO:0002043	blood vessel endothelial cell proliferation involved in sprouting angiogenesis	21	2	1.21	2681	0.3421	0.49952
GO:0015693	magnesium ion transport	21	2	1.21	2264	0.3421	0.426
GO:0090051	negative regulation of cell migration involved in sprouting angiogenesis	21	2	1.21	5125	0.3421	0.8746
GO:0044319	wound healing, spreading of cells	46	3	2.64	3951	0.34222	0.71529
GO:0001836	release of cytochrome c from mitochondria	110	5	6.32	5574	0.34272	0.92139
GO:0016601	Rac protein signal transduction	63	4	3.62	3204	0.34275	0.59072
GO:0030855	epithelial cell differentiation	937	45	53.86	970	0.34588	0.17572
GO:0009311	oligosaccharide metabolic process	106	7	6.09	2401	0.35017	0.44987
GO:0048870	cell motility	2264	103	130.13	276	0.35097	0.03624
GO:0010506	regulation of autophagy	476	31	27.36	5787	0.35149	0.94083
GO:0070588	calcium ion transmembrane transport	440	22	25.29	5007	0.35154	0.8603
GO:0045429	positive regulation of nitric oxide biosynthetic process	68	5	3.91	3116	0.35267	0.57541
GO:0015758	glucose transport	266	24	15.29	3316	0.35551	0.60679
GO:0006977	DNA damage response, signal transduction by p53 class mediator resulting in cell cycle arrest	133	9	7.64	2527	0.35632	0.47131
GO:0006986	response to unfolded protein	277	6	15.92	1709	0.35831	0.32195
GO:0006259	DNA metabolic process	1726	115	99.21	1944	0.35848	0.37077
GO:0006098	pentose-phosphate shunt	37	3	2.13	639	0.35854	0.10891
GO:0051131	chaperone-mediated protein complex assembly	37	3	2.13	881	0.35854	0.15797
GO:0042744	hydrogen peroxide catabolic process	37	3	2.13	38	0.35854	0.00103
GO:0006613	cotranslational protein targeting to membrane	496	101	28.51	1343	0.36272	0.24852
GO:0044281	small molecule metabolic process	3107	243	178.59	196	0.36294	0.02066
GO:0030837	negative regulation of actin filament polymerization	94	7	5.4	1570	0.36308	0.29543
GO:0006833	water transport	35	3	2.01	4595	0.36326	0.80774
GO:0042633	hair cycle	159	10	9.14	4619	0.3633	0.81099
GO:0016558	protein import into peroxisome matrix	22	2	1.26	1172	0.36334	0.21465
GO:0048535	lymph node development	22	2	1.26	5336	0.36334	0.89775
GO:0031125	rRNA 3'-end processing	22	2	1.26	269	0.36334	0.03421
GO:0009151	purine deoxyribonucleotide metabolic process	22	2	1.26	2754	0.36334	0.51268
GO:0015949	nucleobase-containing small molecule interconversion	53	4	3.05	124	0.3634	0.01161
GO:0000469	cleavage involved in rRNA processing	54	3	3.1	46	0.36359	0.00172
GO:0043967	histone H4 acetylation	114	8	6.55	492	0.36403	0.07908
GO:0009593	detection of chemical stimulus	540	22	31.04	392	0.36635	0.05841
GO:0022411	cellular component disassembly	905	75	52.02	5440	0.37269	0.90921
GO:0044282	small molecule catabolic process	552	50	31.73	2968	0.3737	0.5505
GO:0001580	detection of chemical stimulus involved in sensory perception of bitter taste	38	3	2.18	1610	0.37448	0.3041
GO:0006198	cAMP catabolic process	38	3	2.18	3148	0.37448	0.58022
GO:0090026	positive regulation of monocyte chemotaxis	38	3	2.18	5137	0.37448	0.87611
GO:2000114	regulation of establishment of cell polarity	38	3	2.18	3629	0.37448	0.66101
GO:0070372	regulation of ERK1 and ERK2 cascade	439	26	25.23	2078	0.3745	0.39587
GO:0023052	signaling	9862	441	566.85	2844	0.37486	0.53116
GO:0001954	positive regulation of cell-matrix adhesion	76	4	4.37	4483	0.37494	0.79376
GO:0050770	regulation of axonogenesis	271	13	15.58	4981	0.37582	0.85728
GO:0000154	rRNA modification	52	7	2.99	1239	0.37658	0.22806
GO:0032148	activation of protein kinase B activity	54	4	3.1	4748	0.37666	0.82714
GO:0046394	carboxylic acid biosynthetic process	410	27	23.57	134	0.37669	0.01277
GO:0046134	pyrimidine nucleoside biosynthetic process	52	6	2.99	666	0.37678	0.1136
GO:0015791	polyol transport	25	4	1.44	1255	0.37687	0.23045
GO:0002381	immunoglobulin production involved in immunoglobulin mediated immune response	85	6	4.89	1200	0.37715	0.2216
GO:0034109	homotypic cell-cell adhesion	140	9	8.05	4749	0.37718	0.8272
GO:0032530	regulation of microvillus organization	19	2	1.09	3325	0.37719	0.60798
GO:0060046	regulation of acrosome reaction	20	2	1.15	4177	0.37721	0.75312
GO:0010669	epithelial structure maintenance	39	3	2.24	1614	0.37722	0.30509
GO:0021889	olfactory bulb interneuron differentiation	22	2	1.26	2005	0.37723	0.38288
GO:0019674	NAD metabolic process	111	7	6.38	4104	0.37725	0.73983
GO:0071241	cellular response to inorganic substance	251	15	14.43	2716	0.37726	0.50668
GO:0031650	regulation of heat generation	29	2	1.67	303	0.37731	0.04202
GO:0070200	establishment of protein localization to telomere	35	2	2.01	1072	0.37737	0.19339
GO:0009812	flavonoid metabolic process	43	2	2.47	1284	0.37747	0.23669
GO:0010543	regulation of platelet activation	49	2	2.82	724	0.37753	0.1262
GO:0048846	axon extension involved in axon guidance	68	3	3.91	4557	0.37755	0.80216
GO:0051702	interaction with symbiont	87	4	5	94	0.37757	0.00738
GO:0010712	regulation of collagen metabolic process	54	2	3.1	2288	0.37759	0.43096
GO:0043281	regulation of cysteine-type endopeptidase activity involved in apoptotic process	376	20	21.61	3187	0.3777	0.58762
GO:0030518	intracellular steroid hormone receptor signaling pathway	209	10	12.01	788	0.37777	0.1377
GO:0001704	formation of primary germ layer	206	9	11.84	3201	0.37794	0.59036
GO:0022898	regulation of transmembrane transporter activity	315	14	18.11	3637	0.37819	0.66318
GO:0009894	regulation of catabolic process	915	48	52.59	3361	0.37831	0.61494
GO:0050907	detection of chemical stimulus involved in sensory perception	474	17	27.24	1742	0.37942	0.32824
GO:0019752	carboxylic acid metabolic process	1401	96	80.53	298	0.37945	0.04117
GO:0009792	embryo development ending in birth or egg hatching	981	46	56.39	1632	0.37949	0.30793
GO:0006754	ATP biosynthetic process	83	14	4.77	1290	0.38164	0.23854
GO:0051345	positive regulation of hydrolase activity	1552	67	89.21	2945	0.382	0.54684
GO:0032269	negative regulation of cellular protein metabolic process	1745	77	100.3	4841	0.38226	0.84034
GO:0060415	muscle tissue morphogenesis	123	11	7.07	2206	0.3833	0.41621
GO:0006972	hyperosmotic response	41	6	2.36	3962	0.38339	0.7169
GO:0035088	establishment or maintenance of apical/basal cell polarity	64	5	3.68	1240	0.38412	0.22818
GO:0010830	regulation of myotube differentiation	86	6	4.94	2741	0.3842	0.51098
GO:0043536	positive regulation of blood vessel endothelial cell migration	40	3	2.3	4323	0.38431	0.77315
GO:0033145	positive regulation of intracellular steroid hormone receptor signaling pathway	23	2	1.32	351	0.38432	0.05067
GO:0021819	layer formation in cerebral cortex	23	2	1.32	1382	0.38432	0.25548
GO:0019372	lipoxygenase pathway	23	2	1.32	198	0.38432	0.02089
GO:0021554	optic nerve development	23	2	1.32	963	0.38432	0.17489
GO:0001946	lymphangiogenesis	23	2	1.32	4940	0.38432	0.8521
GO:0019852	L-ascorbic acid metabolic process	23	2	1.32	5992	0.38432	0.95772
GO:0071732	cellular response to nitric oxide	23	2	1.32	5833	0.38432	0.94477
GO:0035589	G-protein coupled purinergic nucleotide receptor signaling pathway	23	2	1.32	5688	0.38432	0.93144
GO:0071850	mitotic cell cycle arrest	23	2	1.32	4555	0.38432	0.80203
GO:2000369	regulation of clathrin-dependent endocytosis	23	2	1.32	3558	0.38432	0.65077
GO:0046628	positive regulation of insulin receptor signaling pathway	23	2	1.32	5094	0.38432	0.87056
GO:0090129	positive regulation of synapse maturation	23	2	1.32	5970	0.38432	0.95631
GO:0045721	negative regulation of gluconeogenesis	23	2	1.32	2452	0.38432	0.45846
GO:0006957	complement activation, alternative pathway	23	2	1.32	1877	0.38432	0.35636
GO:0030214	hyaluronan catabolic process	23	2	1.32	3830	0.38432	0.69478
GO:0010225	response to UV-C	23	2	1.32	694	0.38432	0.11986
GO:0000266	mitochondrial fission	60	4	3.45	4926	0.38436	0.85037
GO:0038084	vascular endothelial growth factor signaling pathway	45	3	2.59	2212	0.3844	0.41795
GO:0006911	phagocytosis, engulfment	52	3	2.99	3551	0.38453	0.64924
GO:0046839	phospholipid dephosphorylation	63	3	3.62	1287	0.38472	0.23778
GO:0031589	cell-substrate adhesion	590	33	33.91	3616	0.38483	0.65936
GO:0002407	dendritic cell chemotaxis	54	5	3.1	2604	0.38988	0.48722
GO:0030433	ER-associated ubiquitin-dependent protein catabolic process	122	8	7.01	2976	0.38997	0.55156
GO:0035024	negative regulation of Rho protein signal transduction	39	3	2.24	4984	0.39034	0.85777
GO:0007143	female meiotic division	39	3	2.24	4574	0.39034	0.8046
GO:0071108	protein K48-linked deubiquitination	39	3	2.24	5285	0.39034	0.89137
GO:0032757	positive regulation of interleukin-8 production	58	4	3.33	4504	0.39038	0.79554
GO:0071526	semaphorin-plexin signaling pathway	61	4	3.51	4711	0.39045	0.82271
GO:0060341	regulation of cellular localization	1404	59	80.7	3461	0.39167	0.6349
GO:0051048	negative regulation of secretion	336	16	19.31	4108	0.39199	0.74117
GO:0016925	protein sumoylation	257	16	14.77	2154	0.3932	0.40823
GO:0051897	positive regulation of protein kinase B signaling	138	9	7.93	5449	0.39759	0.90977
GO:0018149	peptide cross-linking	72	5	4.14	4435	0.39897	0.78774
GO:0046676	negative regulation of insulin secretion	56	4	3.22	3421	0.4031	0.62429
GO:0008625	extrinsic apoptotic signaling pathway via death domain receptors	156	9	8.97	4090	0.40346	0.73689
GO:0072384	organelle transport along microtubule	112	10	6.44	2578	0.40404	0.48205
GO:0050687	negative regulation of defense response to virus	34	4	1.95	1429	0.40453	0.2644
GO:0003197	endocardial cushion development	69	5	3.97	4424	0.40486	0.7863
GO:0051085	chaperone mediated protein folding requiring cofactor	24	2	1.38	255	0.40499	0.03041
GO:0007252	I-kappaB phosphorylation	24	2	1.38	4919	0.40499	0.84974
GO:0043471	regulation of cellular carbohydrate catabolic process	24	2	1.38	495	0.40499	0.07974
GO:0006450	regulation of translational fidelity	24	2	1.38	311	0.40499	0.04411
GO:0051895	negative regulation of focal adhesion assembly	24	2	1.38	1354	0.40499	0.25025
GO:0071872	cellular response to epinephrine stimulus	24	2	1.38	2701	0.40499	0.50289
GO:0048935	peripheral nervous system neuron development	24	2	1.38	3861	0.40499	0.70011
GO:0031573	intra-S DNA damage checkpoint	24	2	1.38	596	0.40499	0.09903
GO:0042759	long-chain fatty acid biosynthetic process	24	2	1.38	4789	0.40499	0.83377
GO:0048026	positive regulation of mRNA splicing, via spliceosome	24	2	1.38	1667	0.40499	0.31464
GO:0072075	metanephric mesenchyme development	24	2	1.38	3537	0.40499	0.6478
GO:0033151	V(D)J recombination	44	3	2.53	5084	0.40504	0.86997
GO:0043149	stress fiber assembly	140	8	8.05	5778	0.40521	0.94028
GO:0048754	branching morphogenesis of an epithelial tube	243	13	13.97	4787	0.4055	0.83359
GO:0015721	bile acid and bile salt transport	40	3	2.3	4848	0.4061	0.84171
GO:0030111	regulation of Wnt signaling pathway	524	26	30.12	1577	0.40654	0.29647
GO:0090002	establishment of protein localization to plasma membrane	243	18	13.97	5113	0.40874	0.87277
GO:0051865	protein autoubiquitination	106	7	6.09	3809	0.409	0.69138
GO:0008630	intrinsic apoptotic signaling pathway in response to DNA damage	193	14	11.09	4761	0.40936	0.8288
GO:0015701	bicarbonate transport	73	5	4.2	316	0.41051	0.04433
GO:0009168	purine ribonucleoside monophosphate biosynthetic process	140	19	8.05	1579	0.41087	0.29742
GO:0070848	response to growth factor	1121	47	64.43	1168	0.41102	0.21348
GO:0007568	aging	496	27	28.51	5729	0.41113	0.93487
GO:0016241	regulation of macroautophagy	206	10	11.84	2784	0.41196	0.5196
GO:0050954	sensory perception of mechanical stimulus	304	23	17.47	3160	0.41201	0.58222
GO:1901992	positive regulation of mitotic cell cycle phase transition	96	11	5.52	4553	0.41202	0.80165
GO:0045624	positive regulation of T-helper cell differentiation	41	4	2.36	858	0.41283	0.15157
GO:0046365	monosaccharide catabolic process	113	8	6.5	3141	0.41286	0.57867
GO:0042423	catecholamine biosynthetic process	26	3	1.49	2875	0.41286	0.53726
GO:0051084	'de novo' posttranslational protein folding	33	3	1.9	2926	0.41294	0.54378
GO:0060281	regulation of oocyte development	19	2	1.09	667	0.41298	0.11392
GO:0043217	myelin maintenance	19	2	1.09	2591	0.41298	0.48447
GO:0030157	pancreatic juice secretion	20	2	1.15	552	0.41299	0.0905
GO:0043243	positive regulation of protein complex disassembly	40	3	2.3	5400	0.41303	0.90484
GO:0060831	smoothened signaling pathway involved in dorsal/ventral neural tube patterning	23	2	1.32	4529	0.41303	0.79901
GO:0033144	negative regulation of intracellular steroid hormone receptor signaling pathway	45	3	2.59	417	0.41309	0.06459
GO:0090344	negative regulation of cell aging	29	2	1.67	4792	0.4131	0.83403
GO:0002888	positive regulation of myeloid leukocyte mediated immunity	31	2	1.78	4863	0.41313	0.84358
GO:0009452	7-methylguanosine RNA capping	50	3	2.87	64	0.41315	0.00319
GO:1903036	positive regulation of response to wounding	92	5	5.29	3177	0.41323	0.58621
GO:0045637	regulation of myeloid cell differentiation	308	16	17.7	4685	0.41353	0.81907
GO:0055025	positive regulation of cardiac muscle tissue development	66	2	3.79	4688	0.41355	0.81919
GO:0090559	regulation of membrane permeability	122	4	7.01	2711	0.4138	0.5049
GO:0001889	liver development	210	13	12.07	4720	0.41418	0.82376
GO:0051098	regulation of binding	537	26	30.87	5818	0.41421	0.94333
GO:1903146	regulation of mitophagy	81	6	4.66	281	0.41594	0.03734
GO:0055085	transmembrane transport	2163	126	124.33	2497	0.41948	0.46554
GO:0008156	negative regulation of DNA replication	83	8	4.77	6035	0.42065	0.96165
GO:0045104	intermediate filament cytoskeleton organization	85	7	4.89	65	0.42112	0.00353
GO:0032392	DNA geometric change	167	22	9.6	1206	0.4214	0.22234
GO:0014912	negative regulation of smooth muscle cell migration	41	3	2.36	1761	0.42173	0.33099
GO:1904886	beta-catenin destruction complex disassembly	41	3	2.36	1110	0.42173	0.20161
GO:0032735	positive regulation of interleukin-12 production	74	5	4.25	5946	0.42202	0.95395
GO:0007368	determination of left/right symmetry	179	11	10.29	4231	0.42204	0.76174
GO:0006139	nucleobase-containing compound metabolic process	9739	637	559.78	2872	0.42303	0.53664
GO:0071470	cellular response to osmotic stress	44	6	2.53	2042	0.42436	0.38863
GO:0031929	TOR signaling	142	10	8.16	4664	0.4249	0.8162
GO:0098911	regulation of ventricular cardiac muscle cell action potential	25	2	1.44	2840	0.42532	0.52986
GO:0050667	homocysteine metabolic process	25	2	1.44	362	0.42532	0.05311
GO:0032486	Rap protein signal transduction	25	2	1.44	5369	0.42532	0.90143
GO:0033622	integrin activation	25	2	1.44	810	0.42532	0.14211
GO:0035435	phosphate ion transmembrane transport	25	2	1.44	1738	0.42532	0.32758
GO:0035518	histone H2A monoubiquitination	25	2	1.44	168	0.42532	0.01703
GO:0046130	purine ribonucleoside catabolic process	25	2	1.44	928	0.42532	0.16788
GO:0009650	UV protection	25	2	1.44	353	0.42532	0.05182
GO:2000738	positive regulation of stem cell differentiation	25	2	1.44	397	0.42532	0.05964
GO:0042523	positive regulation of tyrosine phosphorylation of Stat5 protein	25	2	1.44	5887	0.42532	0.94867
GO:0045579	positive regulation of B cell differentiation	25	2	1.44	6184	0.42532	0.97139
GO:0070936	protein K48-linked ubiquitination	91	6	5.23	3701	0.42564	0.67444
GO:0006612	protein targeting to membrane	649	112	37.3	192	0.42931	0.01972
GO:0006695	cholesterol biosynthetic process	83	5	4.77	6134	0.42954	0.96865
GO:0007062	sister chromatid cohesion	227	15	13.05	190	0.43137	0.01956
GO:0006915	apoptotic process	3172	177	182.32	2254	0.43339	0.42489
GO:0001662	behavioral fear response	75	5	4.31	3920	0.43349	0.71036
GO:0009411	response to UV	232	14	13.34	5565	0.4335	0.92071
GO:0006469	negative regulation of protein kinase activity	412	17	23.68	5172	0.43504	0.87995
GO:0000724	double-strand break repair via homologous recombination	156	12	8.97	4385	0.43596	0.78142
GO:0048146	positive regulation of fibroblast proliferation	92	6	5.29	4122	0.43597	0.7432
GO:0061024	membrane organization	2021	192	116.16	3869	0.43666	0.70152
GO:0071157	negative regulation of cell cycle arrest	42	3	2.41	1771	0.43722	0.33329
GO:0045190	isotype switching	77	5	4.43	2157	0.43722	0.40865
GO:0006921	cellular component disassembly involved in execution phase of apoptosis	115	6	6.61	5319	0.43772	0.89575
GO:0042255	ribosome assembly	171	32	9.83	3947	0.43795	0.71491
GO:1990090	cellular response to nerve growth factor stimulus	74	5	4.25	1861	0.44225	0.35348
GO:0035666	TRIF-dependent toll-like receptor signaling pathway	59	4	3.39	4994	0.44232	0.85932
GO:0009117	nucleotide metabolic process	1073	81	61.67	2829	0.44251	0.52698
GO:0006661	phosphatidylinositol biosynthetic process	217	16	12.47	1576	0.44327	0.29608
GO:0019985	translesion synthesis	79	10	4.54	3546	0.44361	0.64884
GO:1901137	carbohydrate derivative biosynthetic process	1253	85	72.02	4790	0.44394	0.83382
GO:0042730	fibrinolysis	45	5	2.59	4121	0.44464	0.743
GO:0006405	RNA export from nucleus	220	15	12.65	768	0.44466	0.13442
GO:0070528	protein kinase C signaling	55	4	3.16	509	0.44517	0.0813
GO:0008209	androgen metabolic process	38	3	2.18	137	0.44518	0.01286
GO:0070527	platelet aggregation	105	6	6.04	5999	0.44528	0.95813
GO:0006089	lactate metabolic process	26	2	1.49	2283	0.44528	0.4302
GO:0035278	miRNA mediated inhibition of translation	26	2	1.49	4506	0.44528	0.79575
GO:0002076	osteoblast development	26	2	1.49	833	0.44528	0.14779
GO:1904659	glucose transmembrane transport	26	2	1.49	3602	0.44528	0.65662
GO:0031274	positive regulation of pseudopodium assembly	26	2	1.49	4747	0.44528	0.82697
GO:0019934	cGMP-mediated signaling	26	2	1.49	3874	0.44528	0.70225
GO:0061029	eyelid development in camera-type eye	26	2	1.49	803	0.44528	0.14016
GO:0006750	glutathione biosynthetic process	26	2	1.49	2826	0.44528	0.52594
GO:0042136	neurotransmitter biosynthetic process	26	2	1.49	4921	0.44528	0.8499
GO:0033033	negative regulation of myeloid cell apoptotic process	26	2	1.49	4942	0.44528	0.85219
GO:0034116	positive regulation of heterotypic cell-cell adhesion	26	2	1.49	5677	0.44528	0.92998
GO:0032012	regulation of ARF protein signal transduction	26	2	1.49	5734	0.44528	0.93526
GO:0009584	detection of visible light	87	11	5	554	0.4456	0.09072
GO:0048009	insulin-like growth factor receptor signaling pathway	60	3	3.45	3479	0.4456	0.63716
GO:0002028	regulation of sodium ion transport	141	7	8.1	5352	0.44582	0.8996
GO:0017015	regulation of transforming growth factor beta receptor signaling pathway	187	9	10.75	290	0.44604	0.03929
GO:0009066	aspartate family amino acid metabolic process	100	9	5.75	310	0.4462	0.04399
GO:0010676	positive regulation of cellular carbohydrate metabolic process	91	8	5.23	490	0.4463	0.07863
GO:0044743	intracellular protein transmembrane import	75	7	4.31	317	0.44632	0.04526
GO:0044257	cellular protein catabolic process	1183	65	68	1251	0.44651	0.22942
GO:1903312	negative regulation of mRNA metabolic process	75	6	4.31	4136	0.44654	0.74541
GO:0050678	regulation of epithelial cell proliferation	491	25	28.22	428	0.44655	0.0664
GO:1902751	positive regulation of cell cycle G2/M phase transition	42	4	2.41	762	0.44656	0.13346
GO:0008211	glucocorticoid metabolic process	35	3	2.01	5110	0.44669	0.87235
GO:0002683	negative regulation of immune system process	620	32	35.64	1681	0.4467	0.31674
GO:0060074	synapse maturation	37	3	2.13	538	0.44672	0.0881
GO:0010828	positive regulation of glucose transport	91	6	5.23	5021	0.44674	0.86218
GO:0010870	positive regulation of receptor biosynthetic process	24	2	1.38	2858	0.44678	0.53435
GO:2000662	regulation of interleukin-5 secretion	10	1	0.57	1067	0.44682	0.19235
GO:1990592	protein K69-linked ufmylation	10	1	0.57	3906	0.44682	0.70869
GO:0021764	amygdala development	10	1	0.57	5259	0.44682	0.88916
GO:0070544	histone H3-K36 demethylation	10	1	0.57	2924	0.44682	0.54355
GO:1901838	positive regulation of transcription of nuclear large rRNA transcript from RNA polymerase I promoter	10	1	0.57	1202	0.44682	0.22201
GO:1902969	mitotic DNA replication	10	1	0.57	3812	0.44682	0.69176
GO:0045629	negative regulation of T-helper 2 cell differentiation	10	1	0.57	4846	0.44682	0.84153
GO:0021869	forebrain ventricular zone progenitor cell division	10	1	0.57	3970	0.44682	0.71809
GO:0048496	maintenance of animal organ identity	10	1	0.57	3246	0.44682	0.59737
GO:0016199	axon midline choice point recognition	10	1	0.57	640	0.44682	0.10891
GO:1901524	regulation of macromitophagy	10	1	0.57	3490	0.44682	0.63891
GO:0060054	positive regulation of epithelial cell proliferation involved in wound healing	10	1	0.57	1271	0.44682	0.2343
GO:0001554	luteolysis	10	1	0.57	3057	0.44682	0.5649
GO:0060087	relaxation of vascular smooth muscle	10	1	0.57	3504	0.44682	0.64157
GO:1900028	negative regulation of ruffle assembly	10	1	0.57	2635	0.44682	0.49282
GO:0051096	positive regulation of helicase activity	10	1	0.57	3206	0.44682	0.59073
GO:0042904	9-cis-retinoic acid biosynthetic process	10	1	0.57	2291	0.44682	0.4315
GO:0048194	Golgi vesicle budding	10	1	0.57	1981	0.44682	0.37986
GO:0001661	conditioned taste aversion	10	1	0.57	5234	0.44682	0.88716
GO:0048102	autophagic cell death	10	1	0.57	3395	0.44682	0.62089
GO:0021637	trigeminal nerve structural organization	10	1	0.57	3866	0.44682	0.70121
GO:0048227	plasma membrane to endosome transport	10	1	0.57	2060	0.44682	0.39216
GO:0072236	metanephric loop of Henle development	10	1	0.57	663	0.44682	0.11288
GO:0033684	regulation of luteinizing hormone secretion	10	1	0.57	3863	0.44682	0.70053
GO:0060372	regulation of atrial cardiac muscle cell membrane repolarization	10	1	0.57	885	0.44682	0.15895
GO:0072711	cellular response to hydroxyurea	10	1	0.57	4626	0.44682	0.81177
GO:0032287	peripheral nervous system myelin maintenance	10	1	0.57	3260	0.44682	0.59927
GO:0032278	positive regulation of gonadotropin secretion	10	1	0.57	2207	0.44682	0.41657
GO:0060405	regulation of penile erection	10	1	0.57	3093	0.44682	0.57176
GO:2001181	positive regulation of interleukin-10 secretion	10	1	0.57	2388	0.44682	0.44821
GO:0021979	hypothalamus cell differentiation	10	1	0.57	259	0.44682	0.03103
GO:1900193	regulation of oocyte maturation	10	1	0.57	2072	0.44682	0.39443
GO:0003357	noradrenergic neuron differentiation	10	1	0.57	1317	0.44682	0.24533
GO:0051182	coenzyme transport	10	1	0.57	92	0.44682	0.00708
GO:0019563	glycerol catabolic process	10	1	0.57	5739	0.44682	0.93614
GO:0007258	JUN phosphorylation	10	1	0.57	4707	0.44682	0.82189
GO:0060287	epithelial cilium movement involved in determination of left/right asymmetry	10	1	0.57	1607	0.44682	0.30396
GO:0043320	natural killer cell degranulation	10	1	0.57	1141	0.44682	0.2085
GO:0031119	tRNA pseudouridine synthesis	10	1	0.57	522	0.44682	0.08433
GO:0060735	regulation of eIF2 alpha phosphorylation by dsRNA	10	1	0.57	763	0.44682	0.1335
GO:0015867	ATP transport	10	1	0.57	2326	0.44682	0.43733
GO:1903147	negative regulation of mitophagy	10	1	0.57	2679	0.44682	0.49897
GO:0043152	induction of bacterial agglutination	10	1	0.57	1335	0.44682	0.24741
GO:0015809	arginine transport	10	1	0.57	5136	0.44682	0.87602
GO:0060839	endothelial cell fate commitment	10	1	0.57	897	0.44682	0.16137
GO:1902369	negative regulation of RNA catabolic process	10	1	0.57	1961	0.44682	0.37525
GO:0032960	regulation of inositol trisphosphate biosynthetic process	10	1	0.57	2617	0.44682	0.49008
GO:0051694	pointed-end actin filament capping	10	1	0.57	3264	0.44682	0.5997
GO:0097039	protein linear polyubiquitination	10	1	0.57	5038	0.44682	0.86441
GO:0030091	protein repair	10	1	0.57	3410	0.44682	0.62256
GO:0009120	deoxyribonucleoside metabolic process	10	1	0.57	2293	0.44682	0.43175
GO:0042426	choline catabolic process	10	1	0.57	1857	0.44682	0.35262
GO:0034384	high-density lipoprotein particle clearance	10	1	0.57	2239	0.44682	0.42308
GO:0031642	negative regulation of myelination	10	1	0.57	1605	0.44682	0.3036
GO:0034331	cell junction maintenance	10	1	0.57	2187	0.44682	0.41225
GO:1903689	regulation of wound healing, spreading of epidermal cells	10	1	0.57	3324	0.44682	0.60796
GO:0060992	response to fungicide	10	1	0.57	2294	0.44682	0.43198
GO:0009249	protein lipoylation	10	1	0.57	883	0.44682	0.15858
GO:0034475	U4 snRNA 3'-end processing	10	1	0.57	350	0.44682	0.05037
GO:0060956	endocardial cell differentiation	10	1	0.57	6002	0.44682	0.95832
GO:2000427	positive regulation of apoptotic cell clearance	10	1	0.57	5015	0.44682	0.86165
GO:0009756	carbohydrate mediated signaling	10	1	0.57	171	0.44682	0.0174
GO:0006572	tyrosine catabolic process	10	1	0.57	3032	0.44682	0.56066
GO:0045113	regulation of integrin biosynthetic process	10	1	0.57	4963	0.44682	0.85497
GO:0002885	positive regulation of hypersensitivity	10	1	0.57	4900	0.44682	0.8472
GO:0097107	postsynaptic density assembly	10	1	0.57	4348	0.44682	0.77647
GO:0033326	cerebrospinal fluid secretion	10	1	0.57	2081	0.44682	0.39642
GO:0090267	positive regulation of mitotic cell cycle spindle assembly checkpoint	10	1	0.57	3843	0.44682	0.69722
GO:1901203	positive regulation of extracellular matrix assembly	10	1	0.57	5484	0.44682	0.91304
GO:0033152	immunoglobulin V(D)J recombination	10	1	0.57	4693	0.44682	0.8207
GO:0070813	hydrogen sulfide metabolic process	10	1	0.57	1464	0.44682	0.27118
GO:0001768	establishment of T cell polarity	10	1	0.57	5106	0.44682	0.87208
GO:0070831	basement membrane assembly	10	1	0.57	4596	0.44682	0.80777
GO:0010760	negative regulation of macrophage chemotaxis	10	1	0.57	4050	0.44682	0.7293
GO:0006085	acetyl-CoA biosynthetic process	30	2	1.72	1684	0.44685	0.31717
GO:0045606	positive regulation of epidermal cell differentiation	35	2	2.01	4071	0.44691	0.73322
GO:0050951	sensory perception of temperature stimulus	38	2	2.18	3021	0.44695	0.55911
GO:0097300	programmed necrotic cell death	56	3	3.22	5037	0.44696	0.86423
GO:0050702	interleukin-1 beta secretion	57	3	3.28	3689	0.44697	0.67222
GO:0042490	mechanoreceptor differentiation	110	6	6.32	1306	0.44698	0.24255
GO:0061462	protein localization to lysosome	42	2	2.41	2219	0.447	0.42066
GO:1905039	carboxylic acid transmembrane transport	100	5	5.75	3742	0.44707	0.68027
GO:0090279	regulation of calcium ion import	171	9	9.83	961	0.44709	0.17454
GO:0043268	positive regulation of potassium ion transport	52	2	2.99	4883	0.44713	0.84534
GO:1901799	negative regulation of proteasomal protein catabolic process	52	2	2.99	5326	0.44713	0.8968
GO:0043550	regulation of lipid kinase activity	88	4	5.06	1747	0.44714	0.32954
GO:0006885	regulation of pH	160	8	9.2	3195	0.44717	0.58928
GO:0002495	antigen processing and presentation of peptide antigen via MHC class II	164	8	9.43	2612	0.44722	0.48899
GO:1902305	regulation of sodium ion transmembrane transport	95	4	5.46	907	0.44723	0.16302
GO:0046883	regulation of hormone secretion	405	20	23.28	4690	0.44764	0.81976
GO:0051250	negative regulation of lymphocyte activation	211	8	12.13	747	0.44782	0.13136
GO:0070374	positive regulation of ERK1 and ERK2 cascade	315	19	18.11	5426	0.44795	0.90713
GO:0010941	regulation of cell death	2649	141	152.26	4495	0.44965	0.79431
GO:0000302	response to reactive oxygen species	361	28	20.75	632	0.44965	0.10732
GO:0009607	response to biotic stimulus	1365	57	78.46	3184	0.45183	0.58715
GO:0007411	axon guidance	387	22	22.24	5201	0.45218	0.88329
GO:0010613	positive regulation of cardiac muscle hypertrophy	43	3	2.47	2321	0.45255	0.43674
GO:0034122	negative regulation of toll-like receptor signaling pathway	43	3	2.47	4895	0.45255	0.84686
GO:0002286	T cell activation involved in immune response	167	10	9.6	806	0.4526	0.14138
GO:0048041	focal adhesion assembly	127	6	7.3	6006	0.45333	0.95851
GO:0043902	positive regulation of multi-organism process	253	17	14.54	2398	0.45427	0.44945
GO:0006887	exocytosis	652	25	37.48	3905	0.45457	0.70863
GO:0032733	positive regulation of interleukin-10 production	70	5	4.02	2883	0.45502	0.53881
GO:0070830	bicellular tight junction assembly	84	5	4.83	5271	0.45542	0.89034
GO:0050896	response to stimulus	13122	659	754.23	5153	0.45655	0.87782
GO:0007030	Golgi organization	153	9	8.79	3518	0.45667	0.644
GO:0007050	cell cycle arrest	436	28	25.06	4977	0.45734	0.85714
GO:0008643	carbohydrate transport	329	31	18.91	2692	0.46082	0.50106
GO:0006508	proteolysis	2660	152	152.89	4540	0.46103	0.80039
GO:0042542	response to hydrogen peroxide	226	20	12.99	6265	0.46267	0.97633
GO:0043497	regulation of protein heterodimerization activity	27	2	1.55	4696	0.46485	0.82094
GO:0042053	regulation of dopamine metabolic process	27	2	1.55	1844	0.46485	0.35071
GO:0071539	protein localization to centrosome	27	2	1.55	4480	0.46485	0.79349
GO:0006265	DNA topological change	27	2	1.55	4578	0.46485	0.80495
GO:1903830	magnesium ion transmembrane transport	27	2	1.55	966	0.46485	0.17517
GO:0051988	regulation of attachment of spindle microtubules to kinetochore	27	2	1.55	3489	0.46485	0.63887
GO:0090141	positive regulation of mitochondrial fission	27	2	1.55	5010	0.46485	0.86077
GO:0045899	positive regulation of RNA polymerase II transcriptional preinitiation complex assembly	27	2	1.55	973	0.46485	0.17602
GO:0042462	eye photoreceptor cell development	46	3	2.64	1309	0.46488	0.24374
GO:0006809	nitric oxide biosynthetic process	120	7	6.9	3390	0.46497	0.62021
GO:0030500	regulation of bone mineralization	109	6	6.27	5529	0.46509	0.91786
GO:0006790	sulfur compound metabolic process	596	40	34.26	375	0.46533	0.05514
GO:0031398	positive regulation of protein ubiquitination	345	22	19.83	4137	0.46572	0.74544
GO:0007276	gamete generation	985	53	56.62	2730	0.46629	0.50892
GO:0045739	positive regulation of DNA repair	91	7	5.23	488	0.46684	0.0785
GO:0046686	response to cadmium ion	64	5	3.68	1604	0.46734	0.3036
GO:0070536	protein K63-linked deubiquitination	44	3	2.53	5555	0.4677	0.92023
GO:0039694	viral RNA genome replication	44	3	2.53	1327	0.4677	0.24656
GO:0010718	positive regulation of epithelial to mesenchymal transition	61	4	3.51	5801	0.46803	0.94192
GO:0002931	response to ischemia	61	4	3.51	265	0.46803	0.03278
GO:0031648	protein destabilization	61	4	3.51	1049	0.46803	0.18797
GO:0001933	negative regulation of protein phosphorylation	682	31	39.2	5064	0.47235	0.86763
GO:0009116	nucleoside metabolic process	677	65	38.91	66	0.47263	0.0037
GO:0006979	response to oxidative stress	676	46	38.86	264	0.47476	0.03235
GO:1901990	regulation of mitotic cell cycle phase transition	582	42	33.45	2240	0.47673	0.42315
GO:0010498	proteasomal protein catabolic process	775	48	44.55	2071	0.47791	0.39443
GO:0035567	non-canonical Wnt signaling pathway	271	18	15.58	2033	0.47816	0.38703
GO:0001780	neutrophil homeostasis	24	3	1.38	4201	0.47834	0.75708
GO:0046931	pore complex assembly	28	3	1.61	2423	0.47839	0.45338
GO:0021872	forebrain generation of neurons	98	7	5.63	2807	0.4784	0.52275
GO:0071711	basement membrane organization	21	2	1.21	1970	0.47853	0.37751
GO:0060603	mammary gland duct morphogenesis	56	4	3.22	2819	0.47853	0.52445
GO:0014874	response to stimulus involved in regulation of muscle adaptation	23	2	1.32	5227	0.47856	0.88661
GO:0015813	L-glutamate transport	24	2	1.38	1363	0.47857	0.25208
GO:0099054	presynapse assembly	24	2	1.38	3389	0.47857	0.62016
GO:2000136	regulation of cell proliferation involved in heart morphogenesis	27	2	1.55	4852	0.47861	0.84194
GO:0061037	negative regulation of cartilage development	45	3	2.59	5475	0.47862	0.9114
GO:0008300	isoprenoid catabolic process	11	1	0.63	3492	0.47863	0.63928
GO:0045627	positive regulation of T-helper 1 cell differentiation	11	1	0.63	2315	0.47863	0.43563
GO:0001821	histamine secretion	11	1	0.63	2376	0.47863	0.44615
GO:1902931	negative regulation of alcohol biosynthetic process	11	1	0.63	1864	0.47863	0.35421
GO:0045607	regulation of auditory receptor cell differentiation	11	1	0.63	5073	0.47863	0.86834
GO:0042996	regulation of Golgi to plasma membrane protein transport	11	1	0.63	2645	0.47863	0.49483
GO:0060050	positive regulation of protein glycosylation	11	1	0.63	6044	0.47863	0.96222
GO:0060029	convergent extension involved in organogenesis	11	1	0.63	559	0.47863	0.09203
GO:0060013	righting reflex	11	1	0.63	602	0.47863	0.10025
GO:1904354	negative regulation of telomere capping	11	1	0.63	5832	0.47863	0.94464
GO:0048290	isotype switching to IgA isotypes	11	1	0.63	1005	0.47863	0.18095
GO:0021644	vagus nerve morphogenesis	11	1	0.63	2723	0.47863	0.50749
GO:0003056	regulation of vascular smooth muscle contraction	11	1	0.63	3640	0.47863	0.66415
GO:0060316	positive regulation of ryanodine-sensitive calcium-release channel activity	11	1	0.63	3670	0.47863	0.66887
GO:0043031	negative regulation of macrophage activation	11	1	0.63	2837	0.47863	0.52962
GO:0086046	membrane depolarization during SA node cell action potential	11	1	0.63	336	0.47863	0.04856
GO:0048820	hair follicle maturation	11	1	0.63	2027	0.47863	0.38541
GO:2001169	regulation of ATP biosynthetic process	11	1	0.63	5450	0.47863	0.90985
GO:2001185	regulation of CD8-positive, alpha-beta T cell activation	11	1	0.63	4088	0.47863	0.73598
GO:0021960	anterior commissure morphogenesis	11	1	0.63	4901	0.47863	0.84728
GO:0072592	oxygen metabolic process	11	1	0.63	3002	0.47863	0.55548
GO:0007161	calcium-independent cell-matrix adhesion	11	1	0.63	1578	0.47863	0.29719
GO:0046015	regulation of transcription by glucose	11	1	0.63	5588	0.47863	0.92224
GO:0044791	positive regulation by host of viral release from host cell	11	1	0.63	3688	0.47863	0.67209
GO:1900122	positive regulation of receptor binding	11	1	0.63	3084	0.47863	0.57098
GO:0071169	establishment of protein localization to chromatin	11	1	0.63	1017	0.47863	0.18355
GO:0032819	positive regulation of natural killer cell proliferation	11	1	0.63	5800	0.47863	0.94186
GO:0032847	regulation of cellular pH reduction	11	1	0.63	2531	0.47863	0.47249
GO:2001225	regulation of chloride transport	11	1	0.63	3351	0.47863	0.61158
GO:0052697	xenobiotic glucuronidation	11	1	0.63	409	0.47863	0.06254
GO:0048619	embryonic hindgut morphogenesis	11	1	0.63	3205	0.47863	0.59072
GO:0032532	regulation of microvillus length	11	1	0.63	5054	0.47863	0.86605
GO:0044848	biological phase	11	1	0.63	4015	0.47863	0.7247
GO:0043144	snoRNA processing	11	1	0.63	533	0.47863	0.08675
GO:0003284	septum primum development	11	1	0.63	886	0.47863	0.15951
GO:0046499	S-adenosylmethioninamine metabolic process	11	1	0.63	1529	0.47863	0.28539
GO:0045075	regulation of interleukin-12 biosynthetic process	11	1	0.63	4067	0.47863	0.73271
GO:0006189	'de novo' IMP biosynthetic process	11	1	0.63	2619	0.47863	0.49025
GO:0035630	bone mineralization involved in bone maturation	11	1	0.63	542	0.47863	0.08856
GO:0002326	B cell lineage commitment	11	1	0.63	5602	0.47863	0.92281
GO:0046294	formaldehyde catabolic process	11	1	0.63	33	0.47863	0.00066
GO:0009414	response to water deprivation	11	1	0.63	933	0.47863	0.16901
GO:0090085	regulation of protein deubiquitination	11	1	0.63	1926	0.47863	0.3647
GO:0031666	positive regulation of lipopolysaccharide-mediated signaling pathway	11	1	0.63	2399	0.47863	0.44946
GO:0034380	high-density lipoprotein particle assembly	11	1	0.63	1320	0.47863	0.24542
GO:0035965	cardiolipin acyl-chain remodeling	11	1	0.63	1871	0.47863	0.35575
GO:0002118	aggressive behavior	11	1	0.63	1006	0.47863	0.18097
GO:2000343	positive regulation of chemokine (C-X-C motif) ligand 2 production	11	1	0.63	4103	0.47863	0.73966
GO:0009211	pyrimidine deoxyribonucleoside triphosphate metabolic process	11	1	0.63	572	0.47863	0.09434
GO:0045348	positive regulation of MHC class II biosynthetic process	11	1	0.63	5670	0.47863	0.92961
GO:0015919	peroxisomal membrane transport	11	1	0.63	1015	0.47863	0.18322
GO:0060965	negative regulation of gene silencing by miRNA	11	1	0.63	1119	0.47863	0.2029
GO:0046884	follicle-stimulating hormone secretion	11	1	0.63	4785	0.47863	0.8333
GO:0034427	nuclear-transcribed mRNA catabolic process, exonucleolytic, 3'-5'	11	1	0.63	605	0.47863	0.10088
GO:0098734	macromolecule depalmitoylation	11	1	0.63	2256	0.47863	0.42507
GO:0002236	detection of misfolded protein	11	1	0.63	332	0.47863	0.04763
GO:0060907	positive regulation of macrophage cytokine production	11	1	0.63	4467	0.47863	0.79181
GO:0061316	canonical Wnt signaling pathway involved in heart development	11	1	0.63	4210	0.47863	0.75812
GO:0046549	retinal cone cell development	11	1	0.63	1016	0.47863	0.18353
GO:0030388	fructose 1,6-bisphosphate metabolic process	11	1	0.63	182	0.47863	0.01868
GO:0016094	polyprenol biosynthetic process	11	1	0.63	380	0.47863	0.05614
GO:0002842	positive regulation of T cell mediated immune response to tumor cell	11	1	0.63	333	0.47863	0.04763
GO:0070131	positive regulation of mitochondrial translation	11	1	0.63	55	0.47863	0.00222
GO:0097104	postsynaptic membrane assembly	11	1	0.63	5246	0.47863	0.88821
GO:0090186	regulation of pancreatic juice secretion	11	1	0.63	1589	0.47863	0.30002
GO:1902548	negative regulation of cellular response to vascular endothelial growth factor stimulus	11	1	0.63	915	0.47863	0.1652
GO:0090116	C-5 methylation of cytosine	11	1	0.63	3136	0.47863	0.57783
GO:0097267	omega-hydroxylase P450 pathway	11	1	0.63	3691	0.47863	0.6724
GO:0014824	artery smooth muscle contraction	11	1	0.63	1790	0.47863	0.33821
GO:0050765	negative regulation of phagocytosis	11	1	0.63	4349	0.47863	0.77653
GO:0014834	skeletal muscle satellite cell maintenance involved in skeletal muscle regeneration	11	1	0.63	4541	0.47863	0.8006
GO:0022615	protein to membrane docking	11	1	0.63	2180	0.47863	0.41153
GO:0010756	positive regulation of plasminogen activation	11	1	0.63	2279	0.47863	0.4291
GO:0090036	regulation of protein kinase C signaling	29	2	1.67	1741	0.47863	0.32803
GO:0006517	protein deglycosylation	31	2	1.78	1275	0.47866	0.235
GO:1905209	positive regulation of cardiocyte differentiation	35	2	2.01	2348	0.47871	0.43975
GO:0051057	positive regulation of small GTPase mediated signal transduction	80	4	4.6	2381	0.47884	0.44733
GO:0032770	positive regulation of monooxygenase activity	46	2	2.64	4214	0.47885	0.75897
GO:0008064	regulation of actin polymerization or depolymerization	275	15	15.81	4085	0.47889	0.73553
GO:0051932	synaptic transmission, GABAergic	68	3	3.91	4038	0.47892	0.72792
GO:0045833	negative regulation of lipid metabolic process	111	4	6.38	653	0.47925	0.11094
GO:0051303	establishment of chromosome localization	108	3	6.21	3247	0.47944	0.59744
GO:0017156	calcium ion regulated exocytosis	163	5	9.37	2378	0.4797	0.4468
GO:0030326	embryonic limb morphogenesis	214	11	12.3	3733	0.47979	0.67908
GO:0043900	regulation of multi-organism process	618	30	35.52	2229	0.47999	0.422
GO:2000021	regulation of ion homeostasis	342	14	19.66	4608	0.48001	0.80923
GO:0007178	transmembrane receptor protein serine/threonine kinase signaling pathway	529	23	30.41	2894	0.48042	0.54015
GO:0040018	positive regulation of multicellular organism growth	62	4	3.56	4924	0.48073	0.85025
GO:0048514	blood vessel morphogenesis	857	38	49.26	1483	0.48134	0.27634
GO:0007585	respiratory gaseous exchange	113	5	6.5	3254	0.48171	0.59837
GO:0040014	regulation of multicellular organism growth	121	8	6.95	1190	0.48239	0.21893
GO:0071805	potassium ion transmembrane transport	310	13	17.82	4138	0.48254	0.74544
GO:2001243	negative regulation of intrinsic apoptotic signaling pathway	165	10	9.48	3219	0.48262	0.59198
GO:0001502	cartilage condensation	45	3	2.59	56	0.48267	0.00232
GO:0060444	branching involved in mammary gland duct morphogenesis	45	3	2.59	1874	0.48267	0.35615
GO:0072661	protein targeting to plasma membrane	45	3	2.59	2114	0.48267	0.40032
GO:0003148	outflow tract septum morphogenesis	45	3	2.59	739	0.48267	0.13025
GO:0043252	sodium-independent organic anion transport	45	3	2.59	1795	0.48267	0.33857
GO:0030449	regulation of complement activation	45	3	2.59	992	0.48267	0.179
GO:0070423	nucleotide-binding oligomerization domain containing signaling pathway	66	4	3.79	3888	0.48276	0.70446
GO:0016233	telomere capping	85	4	4.89	3964	0.48323	0.71729
GO:0061001	regulation of dendritic spine morphogenesis	57	5	3.28	5616	0.48354	0.92361
GO:0006739	NADP metabolic process	65	5	3.74	804	0.4837	0.14029
GO:2000060	positive regulation of protein ubiquitination involved in ubiquitin-dependent protein catabolic proc...	194	12	11.15	3795	0.48384	0.68855
GO:0060065	uterus development	28	2	1.61	3595	0.484	0.6549
GO:0010667	negative regulation of cardiac muscle cell apoptotic process	28	2	1.61	5027	0.484	0.8631
GO:0032793	positive regulation of CREB transcription factor activity	28	2	1.61	2719	0.484	0.50703
GO:1900745	positive regulation of p38MAPK cascade	28	2	1.61	1721	0.484	0.32431
GO:0003215	cardiac right ventricle morphogenesis	28	2	1.61	2954	0.484	0.54828
GO:0070166	enamel mineralization	28	2	1.61	901	0.484	0.16232
GO:1901741	positive regulation of myoblast fusion	28	2	1.61	4849	0.484	0.84172
GO:0045589	regulation of regulatory T cell differentiation	28	2	1.61	4346	0.484	0.77629
GO:0021766	hippocampus development	126	10	7.24	1603	0.48554	0.30355
GO:0051437	positive regulation of ubiquitin-protein ligase activity involved in regulation of mitotic cell cycl...	166	10	9.54	344	0.48583	0.04976
GO:0050918	positive chemotaxis	97	6	5.58	588	0.48702	0.09764
GO:0007052	mitotic spindle organization	81	6	4.66	1618	0.49281	0.30559
GO:0045668	negative regulation of osteoblast differentiation	63	4	3.62	170	0.4933	0.01712
GO:0045494	photoreceptor cell maintenance	63	4	3.62	1924	0.4933	0.36454
GO:0030225	macrophage differentiation	63	4	3.62	4145	0.4933	0.74639
GO:0007498	mesoderm development	209	12	12.01	1955	0.49351	0.37371
GO:0001541	ovarian follicle development	98	6	5.63	5794	0.49706	0.94139
GO:0001942	hair follicle development	126	8	7.24	1121	0.49725	0.20315
GO:0048791	calcium ion-regulated exocytosis of neurotransmitter	46	3	2.64	1651	0.49743	0.31135
GO:0090314	positive regulation of protein targeting to membrane	46	3	2.64	1315	0.49743	0.24504
GO:0045745	positive regulation of G-protein coupled receptor protein signaling pathway	46	3	2.64	3186	0.49743	0.58726
GO:0021915	neural tube development	265	15	15.23	4823	0.49769	0.83861
GO:0046326	positive regulation of glucose import	81	5	4.66	579	0.50097	0.09582
GO:0042059	negative regulation of epidermal growth factor receptor signaling pathway	103	6	5.92	2391	0.50112	0.44846
GO:0031623	receptor internalization	138	8	7.93	4496	0.50113	0.79441
GO:0006518	peptide metabolic process	1719	205	98.81	372	0.50209	0.05466
GO:0002042	cell migration involved in sprouting angiogenesis	69	6	3.97	1311	0.50212	0.2445
GO:0043537	negative regulation of blood vessel endothelial cell migration	50	4	2.87	1640	0.50244	0.30977
GO:0048814	regulation of dendrite morphogenesis	124	8	7.13	4741	0.50253	0.82627
GO:0032094	response to food	61	4	3.51	6105	0.50266	0.96624
GO:0033141	positive regulation of peptidyl-serine phosphorylation of STAT protein	29	2	1.67	765	0.50272	0.13417
GO:0048339	paraxial mesoderm development	29	2	1.67	1743	0.50272	0.32869
GO:0010592	positive regulation of lamellipodium assembly	29	2	1.67	3832	0.50272	0.69576
GO:0043046	DNA methylation involved in gamete generation	29	2	1.67	4195	0.50272	0.75655
GO:0050908	detection of light stimulus involved in visual perception	29	2	1.67	3608	0.50272	0.65849
GO:0051103	DNA ligation involved in DNA repair	29	2	1.67	1030	0.50272	0.18516
GO:0035729	cellular response to hepatocyte growth factor stimulus	29	2	1.67	6361	0.50272	0.98176
GO:2000310	regulation of N-methyl-D-aspartate selective glutamate receptor activity	29	2	1.67	2625	0.50272	0.4912
GO:0097120	receptor localization to synapse	29	2	1.67	5509	0.50272	0.91563
GO:0070816	phosphorylation of RNA polymerase II C-terminal domain	29	2	1.67	2433	0.50272	0.45504
GO:0061053	somite development	136	8	7.82	1237	0.50277	0.22747
GO:0032414	positive regulation of ion transmembrane transporter activity	112	5	6.44	3529	0.50334	0.64653
GO:0051928	positive regulation of calcium ion transport	165	6	9.48	3568	0.50407	0.65175
GO:0006399	tRNA metabolic process	255	29	14.66	946	0.5053	0.17114
GO:0051260	protein homooligomerization	443	31	25.46	2184	0.50536	0.41179
GO:0032024	positive regulation of insulin secretion	106	6	6.09	988	0.50596	0.17815
GO:0008610	lipid biosynthetic process	984	66	56.56	1082	0.5064	0.19522
GO:0060021	palate development	148	10	8.51	4037	0.5071	0.72782
GO:0010639	negative regulation of organelle organization	498	33	28.62	4762	0.50764	0.82888
GO:0033044	regulation of chromosome organization	276	20	15.86	3674	0.50771	0.66958
GO:0006353	DNA-templated transcription, termination	176	14	10.12	975	0.50777	0.17615
GO:0010715	regulation of extracellular matrix disassembly	25	4	1.44	3045	0.50808	0.56275
GO:0006924	activation-induced cell death of T cells	23	3	1.32	5288	0.50829	0.89205
GO:0033173	calcineurin-NFAT signaling cascade	44	4	2.53	1116	0.50834	0.2025
GO:0070206	protein trimerization	68	5	3.91	1726	0.50842	0.32609
GO:0021801	cerebral cortex radial glia guided migration	35	3	2.01	5244	0.50845	0.88802
GO:1904668	positive regulation of ubiquitin protein ligase activity	178	11	10.23	6198	0.5085	0.97252
GO:0001945	lymph vessel development	40	3	2.3	4549	0.50851	0.80138
GO:0006704	glucocorticoid biosynthetic process	25	2	1.44	3018	0.50855	0.55845
GO:0072643	interferon-gamma secretion	28	2	1.61	5349	0.50859	0.8991
GO:0021796	cerebral cortex regionalization	12	1	0.69	1655	0.50861	0.31181
GO:2000667	positive regulation of interleukin-13 secretion	12	1	0.69	4523	0.50861	0.79751
GO:0070572	positive regulation of neuron projection regeneration	12	1	0.69	2626	0.50861	0.49122
GO:0070508	cholesterol import	12	1	0.69	4944	0.50861	0.85249
GO:0001833	inner cell mass cell proliferation	12	1	0.69	3183	0.50861	0.58714
GO:0000097	sulfur amino acid biosynthetic process	12	1	0.69	3981	0.50861	0.71983
GO:1900041	negative regulation of interleukin-2 secretion	12	1	0.69	5348	0.50861	0.89907
GO:0016255	attachment of GPI anchor to protein	12	1	0.69	1669	0.50861	0.31467
GO:0032490	detection of molecule of bacterial origin	12	1	0.69	3322	0.50861	0.60759
GO:0072177	mesonephric duct development	12	1	0.69	850	0.50861	0.15079
GO:0072284	metanephric S-shaped body morphogenesis	12	1	0.69	1332	0.50861	0.24726
GO:0035360	positive regulation of peroxisome proliferator activated receptor signaling pathway	12	1	0.69	3342	0.50861	0.61015
GO:0021603	cranial nerve formation	12	1	0.69	5266	0.50861	0.88987
GO:0050923	regulation of negative chemotaxis	12	1	0.69	2379	0.50861	0.44699
GO:0060385	axonogenesis involved in innervation	12	1	0.69	3876	0.50861	0.7027
GO:0033632	regulation of cell-cell adhesion mediated by integrin	12	1	0.69	6201	0.50861	0.97275
GO:0048743	positive regulation of skeletal muscle fiber development	12	1	0.69	2016	0.50861	0.38406
GO:0060449	bud elongation involved in lung branching	12	1	0.69	1694	0.50861	0.31879
GO:0048570	notochord morphogenesis	12	1	0.69	5177	0.50861	0.88031
GO:0060179	male mating behavior	12	1	0.69	6125	0.50861	0.96813
GO:1903377	negative regulation of oxidative stress-induced neuron intrinsic apoptotic signaling pathway	12	1	0.69	3381	0.50861	0.61914
GO:0048630	skeletal muscle tissue growth	12	1	0.69	1138	0.50861	0.20812
GO:1902083	negative regulation of peptidyl-cysteine S-nitrosylation	12	1	0.69	590	0.50861	0.09801
GO:0032509	endosome transport via multivesicular body sorting pathway	12	1	0.69	1960	0.50861	0.37516
GO:0035897	proteolysis in other organism	12	1	0.69	3679	0.50861	0.66995
GO:0071787	endoplasmic reticulum tubular network assembly	12	1	0.69	3940	0.50861	0.71288
GO:0015810	aspartate transport	12	1	0.69	4881	0.50861	0.84527
GO:0051890	regulation of cardioblast differentiation	12	1	0.69	3352	0.50861	0.61205
GO:0035641	locomotory exploration behavior	12	1	0.69	386	0.50861	0.05695
GO:0002368	B cell cytokine production	12	1	0.69	388	0.50861	0.05763
GO:0006101	citrate metabolic process	12	1	0.69	2369	0.50861	0.44467
GO:0070072	vacuolar proton-transporting V-type ATPase complex assembly	12	1	0.69	4617	0.50861	0.81071
GO:0009445	putrescine metabolic process	12	1	0.69	247	0.50861	0.02958
GO:1902414	protein localization to cell junction	12	1	0.69	2185	0.50861	0.4118
GO:0071638	negative regulation of monocyte chemotactic protein-1 production	12	1	0.69	2297	0.50861	0.43239
GO:1903546	protein localization to photoreceptor outer segment	12	1	0.69	659	0.50861	0.11211
GO:0035999	tetrahydrofolate interconversion	12	1	0.69	4106	0.50861	0.74042
GO:0006702	androgen biosynthetic process	12	1	0.69	1196	0.50861	0.22053
GO:2000344	positive regulation of acrosome reaction	12	1	0.69	4070	0.50861	0.73299
GO:0009221	pyrimidine deoxyribonucleotide biosynthetic process	12	1	0.69	1345	0.50861	0.24884
GO:0046826	negative regulation of protein export from nucleus	12	1	0.69	3101	0.50861	0.57339
GO:0070327	thyroid hormone transport	12	1	0.69	1257	0.50861	0.23056
GO:0006573	valine metabolic process	12	1	0.69	348	0.50861	0.05028
GO:1902715	positive regulation of interferon-gamma secretion	12	1	0.69	4229	0.50861	0.76139
GO:0061325	cell proliferation involved in outflow tract morphogenesis	12	1	0.69	2740	0.50861	0.5108
GO:0045136	development of secondary sexual characteristics	12	1	0.69	5089	0.50861	0.87024
GO:0034214	protein hexamerization	12	1	0.69	775	0.50861	0.13576
GO:0097264	self proteolysis	12	1	0.69	1638	0.50861	0.30901
GO:0061140	lung secretory cell differentiation	12	1	0.69	4261	0.50861	0.76564
GO:0014721	twitch skeletal muscle contraction	12	1	0.69	1208	0.50861	0.22257
GO:0014732	skeletal muscle atrophy	12	1	0.69	5353	0.50861	0.89961
GO:0014894	response to denervation involved in regulation of muscle adaptation	12	1	0.69	696	0.50861	0.12073
GO:0072033	renal vesicle formation	12	1	0.69	2028	0.50861	0.3858
GO:0002677	negative regulation of chronic inflammatory response	12	1	0.69	5901	0.50861	0.94959
GO:2000848	positive regulation of corticosteroid hormone secretion	12	1	0.69	183	0.50861	0.01887
GO:0050713	negative regulation of interleukin-1 beta secretion	12	1	0.69	4943	0.50861	0.85235
GO:0046951	ketone body biosynthetic process	12	1	0.69	508	0.50861	0.08122
GO:0071218	cellular response to misfolded protein	30	2	1.72	2760	0.50861	0.51413
GO:1904948	midbrain dopaminergic neuron differentiation	30	2	1.72	2985	0.50861	0.55299
GO:0044342	type B pancreatic cell proliferation	31	2	1.78	2026	0.50863	0.38537
GO:0070988	demethylation	87	5	5	3559	0.50868	0.65079
GO:0060119	inner ear receptor cell development	71	4	4.08	5492	0.5087	0.91364
GO:0031145	anaphase-promoting complex-dependent catabolic process	169	10	9.71	551	0.50879	0.09038
GO:0003401	axis elongation	43	2	2.47	4698	0.50879	0.82106
GO:0006182	cGMP biosynthetic process	43	2	2.47	2009	0.50879	0.38301
GO:0014037	Schwann cell differentiation	59	2	3.39	4147	0.509	0.74647
GO:0033135	regulation of peptidyl-serine phosphorylation	202	10	11.61	1930	0.50906	0.36529
GO:0046651	lymphocyte proliferation	423	22	24.31	459	0.50923	0.07366
GO:0032535	regulation of cellular component size	580	31	33.34	1718	0.50924	0.32369
GO:0051224	negative regulation of protein transport	351	17	20.17	3213	0.50943	0.59146
GO:0046902	regulation of mitochondrial membrane permeability	113	3	6.5	5208	0.50949	0.88391
GO:0007270	neuron-neuron synaptic transmission	233	9	13.39	3942	0.50971	0.7132
GO:0043270	positive regulation of ion transport	340	13	19.54	1377	0.51022	0.25365
GO:0022617	extracellular matrix disassembly	142	11	8.16	4188	0.51033	0.755
GO:0033157	regulation of intracellular protein transport	646	30	37.13	4064	0.51038	0.73223
GO:0060322	head development	1230	59	70.7	868	0.51153	0.15386
GO:0043277	apoptotic cell clearance	69	5	3.97	5582	0.51164	0.92182
GO:0048678	response to axon injury	113	7	6.5	4954	0.51188	0.85364
GO:0031297	replication fork processing	47	3	2.7	4508	0.51197	0.79601
GO:0006929	substrate-dependent cell migration	47	3	2.7	4700	0.51197	0.82116
GO:0050892	intestinal absorption	47	3	2.7	1590	0.51197	0.30012
GO:0030819	positive regulation of cAMP biosynthetic process	117	7	6.72	3145	0.51198	0.57986
GO:0019882	antigen processing and presentation	363	21	20.86	965	0.51204	0.17505
GO:0048663	neuron fate commitment	105	6	6.04	4367	0.51212	0.77888
GO:0008584	male gonad development	226	13	12.99	3932	0.51298	0.71189
GO:0009165	nucleotide biosynthetic process	515	38	29.6	607	0.51806	0.10119
GO:0022602	ovulation cycle process	135	9	7.76	565	0.52065	0.09278
GO:0010894	negative regulation of steroid biosynthetic process	30	2	1.72	3117	0.52099	0.57563
GO:0010569	regulation of double-strand break repair via homologous recombination	30	2	1.72	2172	0.52099	0.41051
GO:1900025	negative regulation of substrate adhesion-dependent cell spreading	30	2	1.72	6136	0.52099	0.96867
GO:0051450	myoblast proliferation	30	2	1.72	383	0.52099	0.05656
GO:0034314	Arp2/3 complex-mediated actin nucleation	59	3	3.39	2230	0.52123	0.42201
GO:0006629	lipid metabolic process	2128	130	122.31	4463	0.52157	0.79106
GO:0035264	multicellular organism growth	257	16	14.77	5886	0.52419	0.94846
GO:0071417	cellular response to organonitrogen compound	810	38	46.56	997	0.52421	0.17951
GO:0019439	aromatic compound catabolic process	1050	143	60.35	3164	0.52468	0.58396
GO:0006378	mRNA polyadenylation	64	4	3.68	4602	0.52625	0.80872
GO:0002026	regulation of the force of heart contraction	48	3	2.76	3190	0.52629	0.58786
GO:1901264	carbohydrate derivative transport	80	4	4.6	3606	0.52666	0.65843
GO:0070373	negative regulation of ERK1 and ERK2 cascade	101	6	5.81	6389	0.52676	0.98317
GO:0019226	transmission of nerve impulse	109	5	6.27	3005	0.52696	0.55613
GO:0010332	response to gamma radiation	111	8	6.38	5251	0.52948	0.88858
GO:0019216	regulation of lipid metabolic process	462	19	26.56	6146	0.5298	0.96941
GO:0010501	RNA secondary structure unwinding	66	4	3.79	5024	0.53021	0.86289
GO:0032467	positive regulation of cytokinesis	66	4	3.79	2564	0.53021	0.47835
GO:0046034	ATP metabolic process	394	44	22.65	2439	0.53099	0.45673
GO:0006415	translational termination	155	21	8.91	132	0.53403	0.01262
GO:0043535	regulation of blood vessel endothelial cell migration	101	9	5.81	4991	0.53616	0.85865
GO:0051896	regulation of protein kinase B signaling	207	15	11.9	1053	0.53618	0.18903
GO:0001941	postsynaptic membrane organization	52	6	2.99	3855	0.53621	0.69945
GO:0070192	chromosome organization involved in meiotic cell cycle	107	8	6.15	6080	0.53648	0.96508
GO:0071322	cellular response to carbohydrate stimulus	198	12	11.38	4987	0.53678	0.85824
GO:0033136	serine phosphorylation of STAT3 protein	13	1	0.75	1355	0.53686	0.25036
GO:0034651	cortisol biosynthetic process	13	1	0.75	1142	0.53686	0.20863
GO:1901858	regulation of mitochondrial DNA metabolic process	13	1	0.75	1242	0.53686	0.22866
GO:0033240	positive regulation of cellular amine metabolic process	13	1	0.75	789	0.53686	0.1379
GO:0021894	cerebral cortex GABAergic interneuron development	13	1	0.75	5642	0.53686	0.92622
GO:0021860	pyramidal neuron development	13	1	0.75	1423	0.53686	0.26365
GO:0060068	vagina development	13	1	0.75	481	0.53686	0.07753
GO:0030578	PML body organization	13	1	0.75	4843	0.53686	0.84107
GO:0019371	cyclooxygenase pathway	13	1	0.75	879	0.53686	0.15788
GO:0007084	mitotic nuclear envelope reassembly	13	1	0.75	5781	0.53686	0.94051
GO:0060012	synaptic transmission, glycinergic	13	1	0.75	2373	0.53686	0.44551
GO:0080009	mRNA methylation	13	1	0.75	4521	0.53686	0.7973
GO:0000056	ribosomal small subunit export from nucleus	13	1	0.75	364	0.53686	0.05357
GO:0010692	regulation of alkaline phosphatase activity	13	1	0.75	5055	0.53686	0.86616
GO:0032308	positive regulation of prostaglandin secretion	13	1	0.75	4961	0.53686	0.85491
GO:0010666	positive regulation of cardiac muscle cell apoptotic process	13	1	0.75	622	0.53686	0.10382
GO:0010635	regulation of mitochondrial fusion	13	1	0.75	1759	0.53686	0.33037
GO:0021612	facial nerve structural organization	13	1	0.75	3837	0.53686	0.6966
GO:1903054	negative regulation of extracellular matrix organization	13	1	0.75	526	0.53686	0.0852
GO:0003097	renal water transport	13	1	0.75	960	0.53686	0.17433
GO:0045906	negative regulation of vasoconstriction	13	1	0.75	6343	0.53686	0.98102
GO:1900364	negative regulation of mRNA polyadenylation	13	1	0.75	4060	0.53686	0.73116
GO:0006011	UDP-glucose metabolic process	13	1	0.75	2201	0.53686	0.4151
GO:0032700	negative regulation of interleukin-17 production	13	1	0.75	2922	0.53686	0.54317
GO:0060158	phospholipase C-activating dopamine receptor signaling pathway	13	1	0.75	5643	0.53686	0.92622
GO:0032876	negative regulation of DNA endoreduplication	13	1	0.75	4362	0.53686	0.77833
GO:0032825	positive regulation of natural killer cell differentiation	13	1	0.75	5581	0.53686	0.92179
GO:0003374	dynamin family protein polymerization involved in mitochondrial fission	13	1	0.75	5457	0.53686	0.91038
GO:2001224	positive regulation of neuron migration	13	1	0.75	1369	0.53686	0.25317
GO:0035754	B cell chemotaxis	13	1	0.75	4220	0.53686	0.7598
GO:0006489	dolichyl diphosphate biosynthetic process	13	1	0.75	2075	0.53686	0.39524
GO:1903798	regulation of production of miRNAs involved in gene silencing by miRNA	13	1	0.75	787	0.53686	0.13746
GO:0035696	monocyte extravasation	13	1	0.75	798	0.53686	0.13962
GO:0071803	positive regulation of podosome assembly	13	1	0.75	4243	0.53686	0.76327
GO:0045080	positive regulation of chemokine biosynthetic process	13	1	0.75	5459	0.53686	0.91048
GO:0051593	response to folic acid	13	1	0.75	1149	0.53686	0.21061
GO:0051597	response to methylmercury	13	1	0.75	5009	0.53686	0.86064
GO:0071550	death-inducing signaling complex assembly	13	1	0.75	5518	0.53686	0.91642
GO:0060509	Type I pneumocyte differentiation	13	1	0.75	5210	0.53686	0.88397
GO:0035646	endosome to melanosome transport	13	1	0.75	5112	0.53686	0.8727
GO:0071578	zinc II ion transmembrane import	13	1	0.75	4810	0.53686	0.83654
GO:0002315	marginal zone B cell differentiation	13	1	0.75	6115	0.53686	0.96707
GO:0060631	regulation of meiosis I	13	1	0.75	2737	0.53686	0.50991
GO:0032926	negative regulation of activin receptor signaling pathway	13	1	0.75	3922	0.53686	0.71083
GO:0032930	positive regulation of superoxide anion generation	13	1	0.75	1959	0.53686	0.37456
GO:1902474	positive regulation of protein localization to synapse	13	1	0.75	2296	0.53686	0.43237
GO:0051639	actin filament network formation	13	1	0.75	4971	0.53686	0.85606
GO:0046726	positive regulation by virus of viral protein levels in host cell	13	1	0.75	2300	0.53686	0.43327
GO:0006857	oligopeptide transport	13	1	0.75	4743	0.53686	0.82638
GO:0042178	xenobiotic catabolic process	13	1	0.75	5117	0.53686	0.87331
GO:0089711	L-glutamate transmembrane transport	13	1	0.75	5149	0.53686	0.87755
GO:0015939	pantothenate metabolic process	13	1	0.75	443	0.53686	0.07034
GO:0043652	engulfment of apoptotic cell	13	1	0.75	3972	0.53686	0.71837
GO:0070344	regulation of fat cell proliferation	13	1	0.75	5512	0.53686	0.9158
GO:0006545	glycine biosynthetic process	13	1	0.75	5295	0.53686	0.89267
GO:0070459	prolactin secretion	13	1	0.75	99	0.53686	0.00818
GO:0046548	retinal rod cell development	13	1	0.75	1090	0.53686	0.19707
GO:0045162	clustering of voltage-gated sodium channels	13	1	0.75	1933	0.53686	0.36602
GO:0042761	very long-chain fatty acid biosynthetic process	13	1	0.75	3165	0.53686	0.5841
GO:0030497	fatty acid elongation	13	1	0.75	3166	0.53686	0.5841
GO:0097105	presynaptic membrane assembly	13	1	0.75	4716	0.53686	0.82322
GO:0043983	histone H4-K12 acetylation	13	1	0.75	535	0.53686	0.08715
GO:0090286	cytoskeletal anchoring at nuclear membrane	13	1	0.75	6036	0.53686	0.96171
GO:0002679	respiratory burst involved in defense response	13	1	0.75	1559	0.53686	0.29128
GO:2000553	positive regulation of T-helper 2 cell cytokine production	13	1	0.75	3645	0.53686	0.66458
GO:0032049	cardiolipin biosynthetic process	13	1	0.75	3829	0.53686	0.69469
GO:0022605	oogenesis stage	13	1	0.75	4609	0.53686	0.80927
GO:1901725	regulation of histone deacetylase activity	13	1	0.75	2934	0.53686	0.5451
GO:0090281	negative regulation of calcium ion import	31	2	1.78	825	0.53687	0.14534
GO:0002544	chronic inflammatory response	32	2	1.84	5482	0.53688	0.91243
GO:0002438	acute inflammatory response to antigenic stimulus	35	2	2.01	2249	0.53693	0.42443
GO:0071875	adrenergic receptor signaling pathway	39	2	2.24	1575	0.53698	0.296
GO:1900271	regulation of long-term synaptic potentiation	40	2	2.3	5206	0.53699	0.88376
GO:1902041	regulation of extrinsic apoptotic signaling pathway via death domain receptors	100	5	5.75	5190	0.5371	0.88245
GO:0010463	mesenchymal cell proliferation	83	3	4.77	115	0.53734	0.01057
GO:0060491	regulation of cell projection assembly	209	10	12.01	6334	0.53741	0.98059
GO:0097529	myeloid leukocyte migration	235	11	13.51	478	0.53752	0.07713
GO:0097345	mitochondrial outer membrane permeabilization	90	2	5.17	677	0.53768	0.11637
GO:0032963	collagen metabolic process	177	7	10.17	4853	0.53768	0.84201
GO:0035601	protein deacylation	185	7	10.63	3272	0.53779	0.6011
GO:0050684	regulation of mRNA processing	181	6	10.4	6218	0.53798	0.97379
GO:0050880	regulation of blood vessel size	220	8	12.65	5398	0.53803	0.9047
GO:0010948	negative regulation of cell cycle process	429	27	24.66	1473	0.53804	0.27474
GO:0006165	nucleoside diphosphate phosphorylation	168	11	9.66	407	0.53841	0.0617
GO:0009154	purine ribonucleotide catabolic process	69	5	3.97	537	0.53852	0.08809
GO:0021756	striatum development	31	2	1.78	1007	0.53881	0.18139
GO:0050910	detection of mechanical stimulus involved in sensory perception of sound	31	2	1.78	126	0.53881	0.01174
GO:0080111	DNA demethylation	31	2	1.78	3129	0.53881	0.57737
GO:0007141	male meiosis I	31	2	1.78	1910	0.53881	0.36229
GO:1902043	positive regulation of extrinsic apoptotic signaling pathway via death domain receptors	31	2	1.78	5241	0.53881	0.88782
GO:0046135	pyrimidine nucleoside catabolic process	31	2	1.78	3560	0.53881	0.65089
GO:1902187	negative regulation of viral release from host cell	31	2	1.78	5942	0.53881	0.95325
GO:0042573	retinoic acid metabolic process	31	2	1.78	4279	0.53881	0.76788
GO:0030277	maintenance of gastrointestinal epithelium	31	2	1.78	370	0.53881	0.05457
GO:0010259	multicellular organism aging	51	3	2.93	4047	0.53886	0.72898
GO:0050772	positive regulation of axonogenesis	123	7	7.07	2011	0.53891	0.38323
GO:0061178	regulation of insulin secretion involved in cellular response to glucose stimulus	73	4	4.2	4509	0.53896	0.7961
GO:0006623	protein targeting to vacuole	63	3	3.62	2892	0.53911	0.53994
GO:0035904	aorta development	83	4	4.77	5217	0.53916	0.8849
GO:2000147	positive regulation of cell motility	705	31	40.52	359	0.53924	0.05288
GO:0002376	immune system process	3951	182	227.1	3852	0.53961	0.69868
GO:0031069	hair follicle morphogenesis	49	3	2.82	4960	0.54037	0.85458
GO:0015909	long-chain fatty acid transport	92	4	5.29	2118	0.54103	0.40087
GO:0021510	spinal cord development	147	7	8.45	4312	0.5411	0.77118
GO:0000079	regulation of cyclin-dependent protein serine/threonine kinase activity	154	7	8.85	2267	0.54128	0.42638
GO:1901998	toxin transport	67	4	3.85	1057	0.54222	0.18976
GO:0048705	skeletal system morphogenesis	324	12	18.62	6177	0.54343	0.97116
GO:0050900	leukocyte migration	606	27	34.83	6176	0.5484	0.97116
GO:0006406	mRNA export from nucleus	187	12	10.75	4845	0.55089	0.84149
GO:0001709	cell fate determination	68	5	3.91	5014	0.55377	0.86135
GO:2000352	negative regulation of endothelial cell apoptotic process	50	3	2.87	4503	0.55421	0.79536
GO:0006958	complement activation, classical pathway	50	3	2.87	4683	0.55421	0.81852
GO:0006081	cellular aldehyde metabolic process	118	12	6.78	870	0.55434	0.15622
GO:0033077	T cell differentiation in thymus	112	5	6.44	6059	0.55491	0.96329
GO:0009880	embryonic pattern specification	91	7	5.23	1798	0.55558	0.3396
GO:0060048	cardiac muscle contraction	214	9	12.3	2332	0.55575	0.4378
GO:0060314	regulation of ryanodine-sensitive calcium-release channel activity	53	4	3.05	4528	0.55588	0.79879
GO:0045638	negative regulation of myeloid cell differentiation	132	8	7.59	5786	0.55607	0.94073
GO:0043011	myeloid dendritic cell differentiation	32	2	1.84	4542	0.55616	0.80062
GO:0060307	regulation of ventricular cardiac muscle cell membrane repolarization	32	2	1.84	1216	0.55616	0.22341
GO:0051497	negative regulation of stress fiber assembly	32	2	1.84	6091	0.55616	0.96546
GO:0000132	establishment of mitotic spindle orientation	32	2	1.84	2021	0.55616	0.38473
GO:0060259	regulation of feeding behavior	32	2	1.84	2310	0.55616	0.43449
GO:0043101	purine-containing compound salvage	32	2	1.84	1443	0.55616	0.26624
GO:0006471	protein ADP-ribosylation	32	2	1.84	2855	0.55616	0.53327
GO:0051642	centrosome localization	32	2	1.84	5328	0.55616	0.89702
GO:0034453	microtubule anchoring	32	2	1.84	4368	0.55616	0.77897
GO:0046655	folic acid metabolic process	32	2	1.84	6025	0.55616	0.9609
GO:0043984	histone H4-K16 acetylation	32	2	1.84	5167	0.55616	0.87951
GO:0010765	positive regulation of sodium ion transport	71	3	4.08	1351	0.55661	0.24943
GO:0045454	cell redox homeostasis	122	7	7.01	1609	0.55694	0.30406
GO:0045807	positive regulation of endocytosis	176	6	10.12	357	0.55771	0.05237
GO:0045216	cell-cell junction organization	403	16	23.16	3443	0.55883	0.6298
GO:0010035	response to inorganic substance	816	63	46.9	5625	0.55953	0.92475
GO:0048013	ephrin receptor signaling pathway	176	10	10.12	6262	0.56107	0.976
GO:0006397	mRNA processing	820	47	47.13	4678	0.56109	0.81797
GO:0007286	spermatid development	215	12	12.36	3597	0.56127	0.65544
GO:0045839	negative regulation of mitotic nuclear division	68	8	3.91	920	0.56255	0.16605
GO:0010594	regulation of endothelial cell migration	212	16	12.19	5783	0.56262	0.94062
GO:0065002	intracellular protein transmembrane transport	89	8	5.12	5494	0.56285	0.91387
GO:0051444	negative regulation of ubiquitin-protein transferase activity	175	12	10.06	5993	0.56307	0.95781
GO:0060632	regulation of microtubule-based movement	28	3	1.61	439	0.56321	0.06945
GO:1903428	positive regulation of reactive oxygen species biosynthetic process	82	6	4.71	1929	0.56323	0.36517
GO:0022412	cellular process involved in reproduction in multicellular organism	448	27	25.75	5290	0.56324	0.89212
GO:0014829	vascular smooth muscle contraction	36	3	2.07	3047	0.56332	0.56325
GO:0045577	regulation of B cell differentiation	39	3	2.24	5262	0.56336	0.88949
GO:0010998	regulation of translational initiation by eIF2 alpha phosphorylation	24	2	1.38	5120	0.56339	0.87352
GO:0010591	regulation of lamellipodium assembly	43	3	2.47	4550	0.56342	0.80143
GO:2000668	regulation of dendritic cell apoptotic process	14	1	0.8	5685	0.5635	0.93115
GO:2000601	positive regulation of Arp2/3 complex-mediated actin nucleation	14	1	0.8	4454	0.5635	0.7904
GO:0021891	olfactory bulb interneuron development	14	1	0.8	1585	0.5635	0.29939
GO:0072307	regulation of metanephric nephron tubule epithelial cell differentiation	14	1	0.8	1434	0.5635	0.26504
GO:0032342	aldosterone biosynthetic process	14	1	0.8	882	0.5635	0.15845
GO:1904380	endoplasmic reticulum mannose trimming	14	1	0.8	3870	0.5635	0.70183
GO:1901620	regulation of smoothened signaling pathway involved in dorsal/ventral neural tube patterning	14	1	0.8	912	0.5635	0.16478
GO:1904469	positive regulation of tumor necrosis factor secretion	14	1	0.8	1459	0.5635	0.27038
GO:0072235	metanephric distal tubule development	14	1	0.8	2241	0.5635	0.4236
GO:0072203	cell proliferation involved in metanephros development	14	1	0.8	4649	0.5635	0.81381
GO:0050957	equilibrioception	14	1	0.8	4001	0.5635	0.72324
GO:1904238	pericyte cell differentiation	14	1	0.8	814	0.5635	0.14303
GO:0051454	intracellular pH elevation	14	1	0.8	5301	0.5635	0.89337
GO:0048681	negative regulation of axon regeneration	14	1	0.8	876	0.5635	0.15767
GO:0043308	eosinophil degranulation	14	1	0.8	3385	0.5635	0.61949
GO:0009071	serine family amino acid catabolic process	14	1	0.8	294	0.5635	0.0403
GO:0018026	peptidyl-lysine monomethylation	14	1	0.8	3506	0.5635	0.64176
GO:0071223	cellular response to lipoteichoic acid	14	1	0.8	4938	0.5635	0.85186
GO:0022038	corpus callosum development	14	1	0.8	1002	0.5635	0.18051
GO:0006499	N-terminal protein myristoylation	14	1	0.8	3063	0.5635	0.56664
GO:0060837	blood vessel endothelial cell differentiation	14	1	0.8	6096	0.5635	0.96564
GO:0045040	protein import into mitochondrial outer membrane	14	1	0.8	2142	0.5635	0.40474
GO:0045006	DNA deamination	14	1	0.8	5647	0.5635	0.92659
GO:0042363	fat-soluble vitamin catabolic process	14	1	0.8	3772	0.5635	0.68623
GO:0060600	dichotomous subdivision of an epithelial terminal unit	14	1	0.8	2950	0.5635	0.54722
GO:1903599	positive regulation of mitophagy	14	1	0.8	5269	0.5635	0.89021
GO:0045345	positive regulation of MHC class I biosynthetic process	14	1	0.8	5472	0.5635	0.91127
GO:0070365	hepatocyte differentiation	14	1	0.8	699	0.5635	0.12116
GO:0060923	cardiac muscle cell fate commitment	14	1	0.8	3871	0.5635	0.70187
GO:0000966	RNA 5'-end processing	14	1	0.8	2140	0.5635	0.40425
GO:0051918	negative regulation of fibrinolysis	14	1	0.8	2120	0.5635	0.40096
GO:1901386	negative regulation of voltage-gated calcium channel activity	14	1	0.8	3197	0.5635	0.58953
GO:0006662	glycerol ether metabolic process	14	1	0.8	2663	0.5635	0.49709
GO:0070431	nucleotide-binding oligomerization domain containing 2 signaling pathway	14	1	0.8	6066	0.5635	0.96384
GO:0006610	ribosomal protein import into nucleus	14	1	0.8	2607	0.5635	0.48745
GO:0042747	circadian sleep/wake cycle, REM sleep	14	1	0.8	2995	0.5635	0.55429
GO:0014722	regulation of skeletal muscle contraction by calcium ion signaling	14	1	0.8	355	0.5635	0.05198
GO:0045716	positive regulation of low-density lipoprotein particle receptor biosynthetic process	14	1	0.8	3233	0.5635	0.59394
GO:0002638	negative regulation of immunoglobulin production	14	1	0.8	1639	0.5635	0.30929
GO:0045842	positive regulation of mitotic metaphase/anaphase transition	14	1	0.8	1432	0.5635	0.2648
GO:0032000	positive regulation of fatty acid beta-oxidation	14	1	0.8	2244	0.5635	0.42395
GO:0042987	amyloid precursor protein catabolic process	40	2	2.3	3535	0.56362	0.64741
GO:0048668	collateral sprouting	47	2	2.7	2287	0.56371	0.43076
GO:0032411	positive regulation of transporter activity	126	6	7.24	4221	0.56384	0.76001
GO:0042116	macrophage activation	107	4	6.15	5424	0.56406	0.90683
GO:0006029	proteoglycan metabolic process	135	4	7.76	648	0.56445	0.11001
GO:0009056	catabolic process	3628	292	208.53	820	0.56454	0.14367
GO:0006575	cellular modified amino acid metabolic process	256	15	14.71	437	0.56562	0.06931
GO:0018105	peptidyl-serine phosphorylation	455	24	26.15	6684	0.56721	0.99614
GO:0048015	phosphatidylinositol-mediated signaling	369	18	21.21	3161	0.56746	0.5831
GO:0051281	positive regulation of release of sequestered calcium ion into cytosol	62	4	3.56	5221	0.56763	0.88547
GO:0051290	protein heterotetramerization	51	3	2.93	1654	0.56779	0.31175
GO:2000778	positive regulation of interleukin-6 secretion	51	3	2.93	2226	0.56779	0.42151
GO:0051091	positive regulation of sequence-specific DNA binding transcription factor activity	389	17	22.36	5827	0.5694	0.94425
GO:0050850	positive regulation of calcium-mediated signaling	59	6	3.39	2347	0.57214	0.43974
GO:0042181	ketone biosynthetic process	47	3	2.7	3613	0.57298	0.65895
GO:0045948	positive regulation of translational initiation	33	2	1.9	4124	0.57305	0.74371
GO:0046599	regulation of centriole replication	33	2	1.9	1852	0.57305	0.35175
GO:0051900	regulation of mitochondrial depolarization	33	2	1.9	2952	0.57305	0.54742
GO:0097150	neuronal stem cell population maintenance	33	2	1.9	6183	0.57305	0.97135
GO:0061154	endothelial tube morphogenesis	33	2	1.9	5661	0.57305	0.92819
GO:0090136	epithelial cell-cell adhesion	33	2	1.9	6330	0.57305	0.98043
GO:0007126	meiotic nuclear division	287	16	16.5	2736	0.57327	0.50979
GO:0031018	endocrine pancreas development	75	3	4.31	5692	0.57356	0.93186
GO:0008016	regulation of heart contraction	408	17	23.45	1521	0.57544	0.28443
GO:0042787	protein ubiquitination involved in ubiquitin-dependent protein catabolic process	427	26	24.54	3222	0.57555	0.59234
GO:0042060	wound healing	892	38	51.27	1416	0.57649	0.2621
GO:0001934	positive regulation of protein phosphorylation	1518	83	87.25	4598	0.57739	0.80805
GO:0001707	mesoderm formation	126	5	7.24	5359	0.57842	0.90052
GO:0031175	neuron projection development	1397	59	80.3	1770	0.58109	0.33288
GO:0007190	activation of adenylate cyclase activity	52	3	2.99	5036	0.58112	0.86411
GO:0051149	positive regulation of muscle cell differentiation	154	8	8.85	5020	0.58151	0.86208
GO:0045445	myoblast differentiation	125	4	7.18	1764	0.58255	0.33155
GO:0002250	adaptive immune response	616	29	35.41	5805	0.58282	0.94227
GO:0046323	glucose import	139	10	7.99	1637	0.58814	0.30851
GO:0007031	peroxisome organization	54	5	3.1	4164	0.58817	0.74982
GO:0060997	dendritic spine morphogenesis	72	6	4.14	2990	0.58818	0.55345
GO:0007617	mating behavior	39	4	2.24	1084	0.5882	0.19571
GO:0046498	S-adenosylhomocysteine metabolic process	31	3	1.78	3199	0.58834	0.58999
GO:0097028	dendritic cell differentiation	74	5	4.25	5764	0.58845	0.93926
GO:0045986	negative regulation of smooth muscle contraction	25	2	1.44	3087	0.5885	0.57146
GO:0010560	positive regulation of glycoprotein biosynthetic process	26	2	1.49	5896	0.58851	0.9493
GO:0060049	regulation of protein glycosylation	26	2	1.49	5551	0.58851	0.91957
GO:1902188	positive regulation of viral release from host cell	26	2	1.49	1623	0.58851	0.30604
GO:0086019	cell-cell signaling involved in cardiac conduction	46	3	2.64	910	0.58855	0.16443
GO:0051127	positive regulation of actin nucleation	29	2	1.67	5659	0.58855	0.92791
GO:0033147	negative regulation of intracellular estrogen receptor signaling pathway	15	1	0.86	1097	0.5886	0.199
GO:0021785	branchiomotor neuron axon guidance	15	1	0.86	6120	0.5886	0.96747
GO:0001886	endothelial cell morphogenesis	15	1	0.86	3684	0.5886	0.67072
GO:0001514	selenocysteine incorporation	15	1	0.86	1093	0.5886	0.19815
GO:0010510	regulation of acetyl-CoA biosynthetic process from pyruvate	15	1	0.86	1884	0.5886	0.35693
GO:0021563	glossopharyngeal nerve development	15	1	0.86	309	0.5886	0.04351
GO:0000059	protein import into nucleus, docking	15	1	0.86	4377	0.5886	0.78081
GO:0050966	detection of mechanical stimulus involved in sensory perception of pain	15	1	0.86	1876	0.5886	0.3563
GO:0060340	positive regulation of type I interferon-mediated signaling pathway	15	1	0.86	5950	0.5886	0.95418
GO:0043000	Golgi to plasma membrane CFTR protein transport	15	1	0.86	1802	0.5886	0.34108
GO:0071372	cellular response to follicle-stimulating hormone stimulus	15	1	0.86	5514	0.5886	0.91606
GO:0071420	cellular response to histamine	15	1	0.86	4659	0.5886	0.81558
GO:0006048	UDP-N-acetylglucosamine biosynthetic process	15	1	0.86	832	0.5886	0.14759
GO:0048548	regulation of pinocytosis	15	1	0.86	2991	0.5886	0.55366
GO:1900225	regulation of NLRP3 inflammasome complex assembly	15	1	0.86	6169	0.5886	0.97066
GO:0035871	protein K11-linked deubiquitination	15	1	0.86	5264	0.5886	0.8896
GO:0035878	nail development	15	1	0.86	2164	0.5886	0.40965
GO:0000712	resolution of meiotic recombination intermediates	15	1	0.86	1112	0.5886	0.20191
GO:0022028	tangential migration from the subventricular zone to the olfactory bulb	15	1	0.86	1752	0.5886	0.33006
GO:0006307	DNA dealkylation involved in DNA repair	15	1	0.86	422	0.5886	0.06507
GO:0035562	negative regulation of chromatin binding	15	1	0.86	1481	0.5886	0.27604
GO:2000047	regulation of cell-cell adhesion mediated by cadherin	15	1	0.86	4154	0.5886	0.74773
GO:0006172	ADP biosynthetic process	15	1	0.86	4012	0.5886	0.7245
GO:0032927	positive regulation of activin receptor signaling pathway	15	1	0.86	2761	0.5886	0.51463
GO:0032933	SREBP signaling pathway	15	1	0.86	5845	0.5886	0.9456
GO:0038180	nerve growth factor signaling pathway	15	1	0.86	4695	0.5886	0.8209
GO:0009169	purine ribonucleoside monophosphate catabolic process	15	1	0.86	757	0.5886	0.13273
GO:1901033	positive regulation of response to reactive oxygen species	15	1	0.86	4184	0.5886	0.75458
GO:0031659	positive regulation of cyclin-dependent protein serine/threonine kinase activity involved in G1/S tr...	15	1	0.86	1919	0.5886	0.36391
GO:0002115	store-operated calcium entry	15	1	0.86	3910	0.5886	0.70921
GO:0034498	early endosome to Golgi transport	15	1	0.86	1768	0.5886	0.33272
GO:0046855	inositol phosphate dephosphorylation	15	1	0.86	2870	0.5886	0.53622
GO:0009750	response to fructose	15	1	0.86	4631	0.5886	0.81215
GO:0045414	regulation of interleukin-8 biosynthetic process	15	1	0.86	3280	0.5886	0.60222
GO:0045176	apical protein localization	15	1	0.86	5958	0.5886	0.95513
GO:0031987	locomotion involved in locomotory behavior	15	1	0.86	4880	0.5886	0.84502
GO:0070170	regulation of tooth mineralization	15	1	0.86	2683	0.5886	0.49988
GO:2000210	positive regulation of anoikis	15	1	0.86	3074	0.5886	0.56851
GO:0097119	postsynaptic density protein 95 clustering	15	1	0.86	6047	0.5886	0.96242
GO:1902576	negative regulation of nuclear cell cycle DNA replication	15	1	0.86	500	0.5886	0.08061
GO:0016045	detection of bacterium	15	1	0.86	2117	0.5886	0.4007
GO:1902514	regulation of calcium ion transmembrane transport via high voltage-gated calcium channel	15	1	0.86	5209	0.5886	0.88396
GO:0034773	histone H4-K20 trimethylation	15	1	0.86	5307	0.5886	0.89463
GO:0097201	negative regulation of transcription from RNA polymerase II promoter in response to stress	15	1	0.86	3377	0.5886	0.61806
GO:0070723	response to cholesterol	33	2	1.9	3794	0.58861	0.68849
GO:0033555	multicellular organismal response to stress	155	9	8.91	2246	0.58861	0.42407
GO:0021895	cerebral cortex neuron differentiation	34	2	1.95	1353	0.58862	0.24994
GO:0006658	phosphatidylserine metabolic process	37	2	2.13	5026	0.58866	0.86294
GO:0090382	phagosome maturation	56	3	3.22	1830	0.58869	0.34681
GO:0042088	T-helper 1 type immune response	79	4	4.54	6170	0.58876	0.97068
GO:0032924	activin receptor signaling pathway	63	3	3.62	5869	0.58878	0.94725
GO:0046620	regulation of organ growth	121	6	6.95	5380	0.58887	0.90264
GO:0000737	DNA catabolic process, endonucleolytic	71	3	4.08	3380	0.5889	0.61892
GO:0045580	regulation of T cell differentiation	195	10	11.21	2314	0.58893	0.43507
GO:0060384	innervation	46	3	2.64	4999	0.58935	0.85964
GO:0007520	myoblast fusion	64	4	3.68	5774	0.58936	0.93999
GO:0032469	endoplasmic reticulum calcium ion homeostasis	50	3	2.87	4388	0.58943	0.78151
GO:0070584	mitochondrion morphogenesis	34	2	1.95	5330	0.58946	0.89703
GO:0032331	negative regulation of chondrocyte differentiation	34	2	1.95	3541	0.58946	0.64809
GO:0033599	regulation of mammary gland epithelial cell proliferation	34	2	1.95	284	0.58946	0.03754
GO:0007183	SMAD protein complex assembly	34	2	1.95	3292	0.58946	0.60411
GO:0002089	lens morphogenesis in camera-type eye	34	2	1.95	245	0.58946	0.02946
GO:0003181	atrioventricular valve morphogenesis	34	2	1.95	2436	0.58946	0.45599
GO:0006491	N-glycan processing	34	2	1.95	4610	0.58946	0.80938
GO:0043303	mast cell degranulation	78	4	4.48	3791	0.58965	0.68818
GO:0002762	negative regulation of myeloid leukocyte differentiation	81	4	4.66	472	0.58971	0.07618
GO:0048265	response to pain	67	3	3.85	1118	0.58978	0.20287
GO:0034332	adherens junction organization	225	10	12.93	3423	0.59008	0.62455
GO:0001817	regulation of cytokine production	949	45	54.55	1246	0.59104	0.22881
GO:0030902	hindbrain development	246	7	14.14	3405	0.59207	0.622
GO:1903959	regulation of anion transmembrane transport	53	3	3.05	398	0.59418	0.06032
GO:2000249	regulation of actin cytoskeleton reorganization	53	3	3.05	4826	0.59418	0.83901
GO:0001947	heart looping	90	5	5.17	1286	0.59555	0.23749
GO:0010043	response to zinc ion	90	5	5.17	808	0.59555	0.14187
GO:0034599	cellular response to oxidative stress	398	30	22.88	4811	0.60109	0.83654
GO:0051128	regulation of cellular component organization	3813	173	219.17	1018	0.60155	0.18357
GO:0090263	positive regulation of canonical Wnt signaling pathway	218	12	12.53	457	0.60313	0.07315
GO:0043523	regulation of neuron apoptotic process	397	26	22.82	5051	0.60423	0.8658
GO:0009395	phospholipid catabolic process	48	4	2.76	3218	0.60494	0.59183
GO:0031103	axon regeneration	66	4	3.79	4699	0.60532	0.82107
GO:0008334	histone mRNA metabolic process	52	3	2.99	1145	0.60539	0.20967
GO:0048488	synaptic vesicle endocytosis	35	2	2.01	2312	0.60539	0.43495
GO:0003161	cardiac conduction system development	35	2	2.01	5550	0.60539	0.91943
GO:0031581	hemidesmosome assembly	35	2	2.01	6576	0.60539	0.99238
GO:0048070	regulation of developmental pigmentation	35	2	2.01	3542	0.60539	0.64816
GO:0007212	dopamine receptor signaling pathway	68	3	3.91	1068	0.60572	0.19246
GO:0032436	positive regulation of proteasomal ubiquitin-dependent protein catabolic process	146	8	8.39	3749	0.60623	0.6823
GO:0072332	intrinsic apoptotic signaling pathway by p53 class mediator	130	5	7.47	3062	0.60628	0.5664
GO:0007129	synapsis	67	5	3.85	3155	0.60641	0.58087
GO:2000273	positive regulation of receptor activity	65	4	3.74	1705	0.60681	0.32131
GO:1903507	negative regulation of nucleic acid-templated transcription	1952	74	112.2	3620	0.60963	0.65974
GO:0035338	long-chain fatty-acyl-CoA biosynthetic process	73	4	4.2	2602	0.61072	0.48688
GO:0002755	MyD88-dependent toll-like receptor signaling pathway	73	4	4.2	5980	0.61072	0.95698
GO:0031100	animal organ regeneration	129	7	7.41	5708	0.61083	0.93309
GO:0044724	single-organism carbohydrate catabolic process	244	18	14.02	504	0.6113	0.0811
GO:0021675	nerve development	131	11	7.53	4248	0.61143	0.76421
GO:0043069	negative regulation of programmed cell death	1488	88	85.53	3411	0.61165	0.62269
GO:0002262	myeloid cell homeostasis	241	16	13.85	5454	0.61175	0.91006
GO:0031396	regulation of protein ubiquitination	471	29	27.07	4218	0.6118	0.75964
GO:0097186	amelogenesis	44	3	2.53	243	0.61216	0.02875
GO:0030239	myofibril assembly	97	6	5.58	5789	0.61217	0.94109
GO:0051298	centrosome duplication	101	6	5.81	5183	0.61223	0.88174
GO:0048532	anatomical structure arrangement	33	2	1.9	4329	0.61225	0.7739
GO:0036302	atrioventricular canal development	16	1	0.92	3622	0.61226	0.65987
GO:0090557	establishment of endothelial intestinal barrier	16	1	0.92	6416	0.61226	0.98466
GO:0001839	neural plate morphogenesis	16	1	0.92	2262	0.61226	0.42566
GO:1901568	fatty acid derivative metabolic process	16	1	0.92	1009	0.61226	0.18155
GO:0021521	ventral spinal cord interneuron specification	16	1	0.92	1673	0.61226	0.31571
GO:0040015	negative regulation of multicellular organism growth	16	1	0.92	2787	0.61226	0.51991
GO:0032471	negative regulation of endoplasmic reticulum calcium ion concentration	16	1	0.92	6145	0.61226	0.9694
GO:0021670	lateral ventricle development	16	1	0.92	664	0.61226	0.11294
GO:0044341	sodium-dependent phosphate transport	16	1	0.92	2917	0.61226	0.5426
GO:0072201	negative regulation of mesenchymal cell proliferation	16	1	0.92	3288	0.61226	0.60362
GO:0070933	histone H4 deacetylation	16	1	0.92	5004	0.61226	0.86014
GO:0035404	histone-serine phosphorylation	16	1	0.92	1457	0.61226	0.26936
GO:0044252	negative regulation of multicellular organismal metabolic process	16	1	0.92	302	0.61226	0.04201
GO:1902035	positive regulation of hematopoietic stem cell proliferation	16	1	0.92	1131	0.61226	0.20531
GO:0003266	regulation of secondary heart field cardioblast proliferation	16	1	0.92	5456	0.61226	0.91032
GO:0003211	cardiac ventricle formation	16	1	0.92	1364	0.61226	0.25225
GO:2000059	negative regulation of protein ubiquitination involved in ubiquitin-dependent protein catabolic proc...	16	1	0.92	1522	0.61226	0.28446
GO:0045086	positive regulation of interleukin-2 biosynthetic process	16	1	0.92	3952	0.61226	0.71598
GO:0045078	positive regulation of interferon-gamma biosynthetic process	16	1	0.92	1659	0.61226	0.31303
GO:0006105	succinate metabolic process	16	1	0.92	3339	0.61226	0.60937
GO:0006107	oxaloacetate metabolic process	16	1	0.92	4117	0.61226	0.74273
GO:0060677	ureteric bud elongation	16	1	0.92	2777	0.61226	0.51858
GO:0061050	regulation of cell growth involved in cardiac muscle cell development	16	1	0.92	4842	0.61226	0.84078
GO:0061000	negative regulation of dendritic spine development	16	1	0.92	6071	0.61226	0.96425
GO:0042182	ketone catabolic process	16	1	0.92	2132	0.61226	0.40324
GO:0045347	negative regulation of MHC class II biosynthetic process	16	1	0.92	6423	0.61226	0.98502
GO:0046541	saliva secretion	16	1	0.92	3159	0.61226	0.58125
GO:0070424	regulation of nucleotide-binding oligomerization domain containing signaling pathway	16	1	0.92	6266	0.61226	0.97637
GO:0036006	cellular response to macrophage colony-stimulating factor stimulus	16	1	0.92	1711	0.61226	0.32291
GO:0048050	post-embryonic eye morphogenesis	16	1	0.92	980	0.61226	0.17713
GO:0045836	positive regulation of meiotic nuclear division	16	1	0.92	4187	0.61226	0.75495
GO:0033169	histone H3-K9 demethylation	16	1	0.92	4115	0.61226	0.74244
GO:0042537	benzene-containing compound metabolic process	34	2	1.95	5240	0.61227	0.88776
GO:0033627	cell adhesion mediated by integrin	88	5	5.06	5060	0.61229	0.86726
GO:0071354	cellular response to interleukin-6	38	2	2.18	1587	0.61232	0.29961
GO:0021680	cerebellar Purkinje cell layer development	42	2	2.41	2242	0.61238	0.42373
GO:0051279	regulation of release of sequestered calcium ion into cytosol	129	7	7.41	6429	0.61238	0.9853
GO:0006691	leukotriene metabolic process	43	2	2.47	785	0.61239	0.13719
GO:0031023	microtubule organizing center organization	198	10	11.38	5754	0.61262	0.9377
GO:0043616	keratinocyte proliferation	59	2	3.39	1185	0.61262	0.21773
GO:0042058	regulation of epidermal growth factor receptor signaling pathway	170	8	9.77	6054	0.61272	0.96294
GO:0030166	proteoglycan biosynthetic process	89	3	5.12	5578	0.6128	0.92169
GO:0006336	DNA replication-independent nucleosome assembly	82	2	4.71	3428	0.61294	0.62621
GO:0051341	regulation of oxidoreductase activity	138	5	7.93	756	0.613	0.13263
GO:0071773	cellular response to BMP stimulus	222	4	12.76	1602	0.61443	0.30346
GO:0014823	response to activity	125	8	7.18	6467	0.61453	0.9878
GO:0042592	homeostatic process	2748	146	157.95	2678	0.61554	0.49888
GO:0007173	epidermal growth factor receptor signaling pathway	262	13	15.06	5726	0.6162	0.93462
GO:0006974	cellular response to DNA damage stimulus	1376	95	79.09	5956	0.61651	0.95485
GO:0016055	Wnt signaling pathway	801	45	46.04	4613	0.62028	0.81026
GO:1900182	positive regulation of protein localization to nucleus	206	12	11.84	5531	0.62077	0.91792
GO:0016338	calcium-independent cell-cell adhesion via plasma membrane cell-adhesion molecules	36	2	2.07	704	0.62086	0.1215
GO:0006465	signal peptide processing	36	2	2.07	4033	0.62086	0.7274
GO:0090312	positive regulation of protein deacetylation	36	2	2.07	3466	0.62086	0.63575
GO:0031016	pancreas development	123	7	7.07	3308	0.62086	0.60575
GO:1901800	positive regulation of proteasomal protein catabolic process	182	10	10.46	669	0.621	0.11477
GO:0032212	positive regulation of telomere maintenance via telomerase	74	4	4.25	150	0.6215	0.01486
GO:0018205	peptidyl-lysine modification	719	37	41.33	1279	0.62243	0.23526
[truncated: 5,978 more rows]

## Sheet: NEGLiu.adjArraySexRaceSiteCell
GO.ID	Term	Annotated	Significant	Expected	Rank in ks_weight01	fisher_weight01	ks_weight01
GO:0019083	viral transcription	618	109	35.38	2	3e-30	< 1e-30
GO:0006614	SRP-dependent cotranslational protein targeting to membrane	488	100	27.94	1	2e-29	< 1e-30
GO:0006413	translational initiation	682	122	39.05	3	3.5e-29	< 1e-30
GO:0000184	nuclear-transcribed mRNA catabolic process, nonsense-mediated decay	533	103	30.52	4	4.3e-28	< 1e-30
GO:0006364	rRNA processing	753	126	43.11	5	4.3e-23	< 1e-30
GO:0002181	cytoplasmic translation	186	40	10.65	7	3.3e-12	3.6e-15
GO:0000470	maturation of LSU-rRNA	103	20	5.9	6	2.9e-07	3e-15
GO:0001731	formation of translation preinitiation complex	48	14	2.75	13	2.9e-07	6e-07
GO:0006283	transcription-coupled nucleotide-excision repair	135	23	7.73	19	2.5e-06	9.4e-05
GO:0006446	regulation of translational initiation	151	20	8.65	28	3e-06	0.00032
GO:0042776	mitochondrial ATP synthesis coupled proton transport	38	11	2.18	11	6e-06	1.2e-08
GO:0000027	ribosomal large subunit assembly	82	16	4.69	10	1.4e-05	9e-10
GO:0070125	mitochondrial translational elongation	119	19	6.81	8	4.6e-05	2.6e-12
GO:0000028	ribosomal small subunit assembly	55	12	3.15	14	5.2e-05	7.8e-06
GO:0048007	antigen processing and presentation, exogenous lipid antigen via MHC class Ib	10	5	0.57	159	0.00012	0.01634
GO:0006414	translational elongation	226	35	12.94	12	0.00013	2.4e-08
GO:0071941	nitrogen cycle metabolic process	29	6	1.66	32	0.00015	0.0005
GO:0075713	establishment of integrated proviral latency	22	7	1.26	31	0.00016	0.0005
GO:0006768	biotin metabolic process	22	7	1.26	117	0.00016	0.01072
GO:0006296	nucleotide-excision repair, DNA incision, 5'-to lesion	73	13	4.18	51	0.00023	0.00203
GO:0070126	mitochondrial translational termination	125	18	7.16	9	0.00028	9e-12
GO:0000715	nucleotide-excision repair, DNA damage recognition	48	10	2.75	354	0.00033	0.05075
GO:0043436	oxoacid metabolic process	1409	101	80.67	141	0.0006	0.01377
GO:0010388	cullin deneddylation	14	5	0.8	181	0.00079	0.01925
GO:0042769	DNA damage response, detection of DNA damage	73	12	4.18	106	0.00085	0.00979
GO:0030490	maturation of SSU-rRNA	96	15	5.5	289	0.00088	0.03916
GO:0006703	estrogen biosynthetic process	21	6	1.2	187	0.0009	0.02044
GO:0042176	regulation of protein catabolic process	682	37	39.05	238	0.00092	0.02935
GO:0070987	error-free translesion synthesis	46	9	2.63	77	0.00104	0.00613
GO:0006363	termination of RNA polymerase I transcription	48	9	2.75	218	0.00143	0.02471
GO:0006351	transcription, DNA-templated	6072	301	347.66	286	0.00164	0.03863
GO:0009264	deoxyribonucleotide catabolic process	28	6	1.6	508	0.0017	0.08351
GO:0097010	eukaryotic translation initiation factor 4F complex assembly	10	4	0.57	62	0.0017	0.00333
GO:0000722	telomere maintenance via recombination	59	10	3.38	75	0.00177	0.00585
GO:0032508	DNA duplex unwinding	142	20	8.13	820	0.00188	0.14913
GO:0098609	cell-cell adhesion	2187	115	125.22	74	0.00211	0.00568
GO:0006361	transcription initiation from RNA polymerase I promoter	51	9	2.92	303	0.00222	0.04323
GO:0042276	error-prone translesion synthesis	42	8	2.4	298	0.00234	0.04123
GO:2000001	regulation of DNA damage checkpoint	25	6	1.43	348	0.00241	0.05
GO:0046386	deoxyribose phosphate catabolic process	29	6	1.66	642	0.00255	0.1112
GO:1900264	positive regulation of DNA-directed DNA polymerase activity	11	4	0.63	233	0.00255	0.02792
GO:0070900	mitochondrial tRNA modification	18	5	1.03	78	0.0028	0.00618
GO:0016254	preassembly of GPI anchor in ER membrane	26	6	1.49	85	0.00298	0.00686
GO:0051031	tRNA transport	60	10	3.44	58	0.00326	0.00297
GO:2001057	reactive nitrogen species metabolic process	133	12	7.61	90	0.00328	0.00749
GO:0007008	outer mitochondrial membrane organization	20	4	1.15	59	0.00329	0.00299
GO:0015991	ATP hydrolysis coupled proton transport	54	9	3.09	604	0.00333	0.10453
GO:0046500	S-adenosylmethionine metabolic process	35	7	2	1104	0.00361	0.1977
GO:0006183	GTP biosynthetic process	19	5	1.09	143	0.00362	0.01388
GO:0034656	nucleobase-containing small molecule catabolic process	12	4	0.69	329	0.00366	0.04734
GO:0071474	cellular hyperosmotic response	12	4	0.69	81	0.00366	0.00648
GO:0035927	RNA import into mitochondrion	12	4	0.69	93	0.00366	0.00845
GO:0016485	protein processing	384	27	21.99	144	0.00392	0.014
GO:1904714	regulation of chaperone-mediated autophagy	28	6	1.6	41	0.00442	0.0013
GO:0030488	tRNA methylation	47	8	2.69	257	0.00484	0.03317
GO:0009204	deoxyribonucleoside triphosphate catabolic process	13	4	0.74	969	0.00504	0.1725
GO:1903825	organic acid transmembrane transport	107	8	6.13	285	0.00551	0.03846
GO:0006362	transcription elongation from RNA polymerase I promoter	48	8	2.75	365	0.00552	0.05202
GO:0006694	steroid biosynthetic process	218	18	12.48	240	0.0063	0.03016
GO:0071472	cellular response to salt stress	14	4	0.8	30	0.00674	0.00041
GO:0006241	CTP biosynthetic process	22	5	1.26	71	0.0071	0.00493
GO:0009143	nucleoside triphosphate catabolic process	21	7	1.2	401	0.00839	0.0607
GO:0035336	long-chain fatty-acyl-CoA metabolic process	81	7	4.64	1037	0.00844	0.18363
GO:0075522	IRES-dependent viral translational initiation	23	5	1.32	618	0.00866	0.10817
GO:0032259	methylation	573	41	32.81	290	0.00872	0.03921
GO:0071679	commissural neuron axon guidance	15	4	0.86	1334	0.00878	0.24853
GO:0006228	UTP biosynthetic process	15	4	0.86	201	0.00878	0.02207
GO:0070389	chaperone cofactor-dependent protein refolding	15	4	0.86	1017	0.00878	0.18001
GO:0006297	nucleotide-excision repair, DNA gap filling	52	8	2.98	351	0.009	0.05053
GO:0006730	one-carbon metabolic process	54	8	3.09	1809	0.0092	0.34352
GO:0006633	fatty acid biosynthetic process	218	17	12.48	111	0.00939	0.01036
GO:0045738	negative regulation of DNA repair	26	3	1.49	291	0.00946	0.03924
GO:0006294	nucleotide-excision repair, preincision complex assembly	53	8	3.03	850	0.01008	0.1531
GO:0006122	mitochondrial electron transport, ubiquinol to cytochrome c	24	5	1.37	27	0.01043	0.00031
GO:0070911	global genome nucleotide-excision repair	76	10	4.35	463	0.0112	0.0732
GO:0006293	nucleotide-excision repair, preincision complex stabilization	34	6	1.95	173	0.01179	0.01807
GO:0000717	nucleotide-excision repair, DNA duplex unwinding	44	7	2.52	1262	0.01185	0.23311
GO:0006278	RNA-dependent DNA biosynthetic process	140	11	8.02	223	0.01211	0.02585
GO:0090266	regulation of mitotic cell cycle spindle assembly checkpoint	19	4	1.09	648	0.01211	0.11211
GO:0032205	negative regulation of telomere maintenance	60	5	3.44	691	0.01214	0.12134
GO:0032981	mitochondrial respiratory chain complex I assembly	78	10	4.47	18	0.01333	6.8e-05
GO:0007005	mitochondrion organization	1051	95	60.18	101	0.01393	0.00942
GO:0042693	muscle cell fate commitment	31	5	1.77	175	0.01397	0.01878
GO:0006295	nucleotide-excision repair, DNA incision, 3'-to lesion	36	6	2.06	115	0.0155	0.01066
GO:0046688	response to copper ion	36	6	2.06	42	0.0155	0.00131
GO:0036297	interstrand cross-link repair	92	11	5.27	788	0.01593	0.14287
GO:0018410	C-terminal protein amino acid modification	22	6	1.26	145	0.01652	0.01413
GO:0000720	pyrimidine dimer repair by nucleotide-excision repair	10	3	0.57	112	0.01659	0.01039
GO:0009146	purine nucleoside triphosphate catabolic process	10	3	0.57	1487	0.01659	0.28004
GO:0045359	positive regulation of interferon-beta biosynthetic process	10	3	0.57	509	0.01659	0.08353
GO:0030210	heparin biosynthetic process	10	3	0.57	686	0.01659	0.12018
GO:0042274	ribosomal small subunit biogenesis	151	25	8.65	327	0.01668	0.04671
GO:0000387	spliceosomal snRNP assembly	66	9	3.78	26	0.01673	0.0003
GO:0000422	mitophagy	143	13	8.19	1768	0.01676	0.33739
GO:0006264	mitochondrial DNA replication	18	4	1.03	83	0.01718	0.00659
GO:0018298	protein-chromophore linkage	18	4	1.03	50	0.01718	0.00195
GO:0001302	replicative cell aging	18	4	1.03	1002	0.01718	0.17714
GO:0044283	small molecule biosynthetic process	798	56	45.69	814	0.01799	0.14724
GO:0006220	pyrimidine nucleotide metabolic process	73	10	4.18	791	0.0181	0.14355
GO:0019081	viral translation	27	7	1.55	199	0.01811	0.02183
GO:0070897	DNA-templated transcriptional preinitiation complex assembly	63	6	3.61	1058	0.01818	0.18687
GO:0042790	transcription of nuclear large rRNA transcript from RNA polymerase I promoter	22	3	1.26	1057	0.01819	0.18684
GO:1901796	regulation of signal transduction by p53 class mediator	323	24	18.49	1588	0.02	0.30059
GO:0043507	positive regulation of JUN kinase activity	103	7	5.9	1685	0.02011	0.32186
GO:0022904	respiratory electron transport chain	125	21	7.16	255	0.0203	0.03285
GO:0000723	telomere maintenance	267	26	15.29	70	0.02044	0.00481
GO:0016236	macroautophagy	412	31	23.59	629	0.02059	0.10938
GO:0060982	coronary artery morphogenesis	19	4	1.09	681	0.02079	0.11916
GO:0006975	DNA damage induced protein phosphorylation	19	4	1.09	2104	0.02079	0.40029
GO:0048660	regulation of smooth muscle cell proliferation	200	12	11.45	860	0.0209	0.15458
GO:0042775	mitochondrial ATP synthesis coupled electron transport	105	17	6.01	265	0.02153	0.0349
GO:1903232	melanosome assembly	11	3	0.63	671	0.02186	0.11637
GO:1902231	positive regulation of intrinsic apoptotic signaling pathway in response to DNA damage	11	3	0.63	1764	0.02186	0.33661
GO:0042538	hyperosmotic salinity response	11	3	0.63	155	0.02186	0.0155
GO:0019076	viral release from host cell	72	6	4.12	37	0.02187	0.00091
GO:0006457	protein folding	364	31	20.84	15	0.02228	1e-05
GO:0097191	extrinsic apoptotic signaling pathway	425	23	24.33	248	0.02293	0.03163
GO:1902600	hydrogen ion transmembrane transport	181	26	10.36	856	0.02338	0.15432
GO:1900119	positive regulation of execution phase of apoptosis	20	4	1.15	2308	0.02484	0.4371
GO:0050746	regulation of lipoprotein metabolic process	20	4	1.15	870	0.02484	0.1565
GO:0019430	removal of superoxide radicals	42	5	2.4	84	0.02485	0.00679
GO:0009083	branched-chain amino acid catabolic process	30	5	1.72	178	0.02636	0.01898
GO:0009060	aerobic respiration	115	15	6.58	824	0.02639	0.14954
GO:0006119	oxidative phosphorylation	133	20	7.61	250	0.02745	0.03183
GO:0051823	regulation of synapse structural plasticity	24	5	1.37	1091	0.02786	0.19346
GO:0021955	central nervous system neuron axonogenesis	45	5	2.58	2131	0.02792	0.40404
GO:0006501	C-terminal protein lipidation	12	3	0.69	100	0.02792	0.00942
GO:0006099	tricarboxylic acid cycle	52	7	2.98	34	0.02794	0.00057
GO:0022400	regulation of rhodopsin mediated signaling pathway	41	6	2.35	425	0.02813	0.06548
GO:1902808	positive regulation of cell cycle G1/S phase transition	46	7	2.63	1111	0.02908	0.19918
GO:0051917	regulation of fibrinolysis	19	3	1.09	1211	0.02917	0.22118
GO:0014904	myotube cell development	59	4	3.38	1380	0.02921	0.25667
GO:0006195	purine nucleotide catabolic process	90	9	5.15	2236	0.02926	0.42494
GO:0046459	short-chain fatty acid metabolic process	21	4	1.2	33	0.02933	0.00055
GO:0046415	urate metabolic process	21	4	1.2	405	0.02933	0.062
GO:0006165	nucleoside diphosphate phosphorylation	168	14	9.62	419	0.02991	0.06467
GO:0043968	histone H2A acetylation	31	5	1.77	470	0.02999	0.0744
GO:0032206	positive regulation of telomere maintenance	106	9	6.07	2396	0.03001	0.45401
GO:0010827	regulation of glucose transport	195	17	11.16	280	0.03048	0.03818
GO:0007584	response to nutrient	290	17	16.6	2973	0.03272	0.55166
GO:0006409	tRNA export from nucleus	54	7	3.09	46	0.03355	0.00174
GO:1904874	positive regulation of telomerase RNA localization to Cajal body	32	5	1.83	36	0.03393	0.00091
GO:0031116	positive regulation of microtubule polymerization	22	4	1.26	987	0.03427	0.17415
GO:0060539	diaphragm development	22	4	1.26	901	0.03427	0.16105
GO:0006417	regulation of translation	611	53	34.98	912	0.03462	0.16315
GO:1901607	alpha-amino acid biosynthetic process	117	9	6.7	66	0.03478	0.00426
GO:0001561	fatty acid alpha-oxidation	13	3	0.74	134	0.03479	0.01247
GO:0006167	AMP biosynthetic process	13	3	0.74	1589	0.03479	0.3017
GO:0090091	positive regulation of extracellular matrix disassembly	13	3	0.74	2033	0.03479	0.38733
GO:0015939	pantothenate metabolic process	13	3	0.74	392	0.03479	0.05863
GO:0000462	maturation of SSU-rRNA from tricistronic rRNA transcript (SSU-rRNA, 5.8S rRNA, LSU-rRNA)	75	9	4.29	149	0.03975	0.01439
GO:0006720	isoprenoid metabolic process	186	19	10.65	721	0.04178	0.12631
GO:0002040	sprouting angiogenesis	138	13	7.9	2626	0.0419	0.49601
GO:0034308	primary alcohol metabolic process	74	10	4.24	640	0.04191	0.111
GO:0000271	polysaccharide biosynthetic process	133	13	7.61	454	0.04193	0.0715
GO:0016056	rhodopsin mediated signaling pathway	47	8	2.69	190	0.04193	0.0209
GO:0018206	peptidyl-methionine modification	18	4	1.03	1459	0.04205	0.27506
GO:0072524	pyridine-containing compound metabolic process	233	15	13.34	197	0.04212	0.02164
GO:0032732	positive regulation of interleukin-1 production	63	5	3.61	1793	0.04213	0.34155
GO:0030865	cortical cytoskeleton organization	50	4	2.86	160	0.04214	0.01636
GO:0016101	diterpenoid metabolic process	134	12	7.67	169	0.04229	0.01756
GO:0008216	spermidine metabolic process	14	3	0.8	123	0.04244	0.01176
GO:0042045	epithelial fluid transport	14	3	0.8	572	0.04244	0.09761
GO:0051770	positive regulation of nitric-oxide synthase biosynthetic process	14	3	0.8	2489	0.04244	0.47144
GO:0009157	deoxyribonucleoside monophosphate biosynthetic process	14	3	0.8	127	0.04244	0.01192
GO:0002703	regulation of leukocyte mediated immunity	267	9	15.29	414	0.04252	0.0633
GO:0018279	protein N-linked glycosylation via asparagine	69	8	3.95	302	0.04294	0.04283
GO:0000732	strand displacement	57	7	3.26	472	0.04328	0.07451
GO:0060071	Wnt signaling pathway, planar cell polarity pathway	199	17	11.39	97	0.04346	0.00912
GO:0060070	canonical Wnt signaling pathway	500	29	28.63	2969	0.04518	0.55115
GO:2001021	negative regulation of response to DNA damage stimulus	100	11	5.73	424	0.04526	0.06542
GO:0006271	DNA strand elongation involved in DNA replication	38	6	2.18	459	0.0454	0.0726
GO:0043928	exonucleolytic nuclear-transcribed mRNA catabolic process involved in deadenylation-dependent decay	46	6	2.63	830	0.04615	0.15015
GO:0006816	calcium ion transport	631	39	36.13	211	0.047	0.02393
GO:0010906	regulation of glucose metabolic process	176	16	10.08	1447	0.04724	0.27151
GO:0007077	mitotic nuclear envelope disassembly	71	8	4.07	977	0.04951	0.17306
GO:0009062	fatty acid catabolic process	127	17	7.27	2229	0.05023	0.42409
GO:0000245	spliceosomal complex assembly	98	7	5.61	377	0.0507	0.05402
GO:0060017	parathyroid gland development	15	3	0.86	1789	0.05085	0.34076
GO:0042048	olfactory behavior	15	3	0.86	2422	0.05085	0.45897
GO:0050707	regulation of cytokine secretion	265	16	15.17	1873	0.05096	0.35712
GO:0007004	telomere maintenance via telomerase	131	8	7.5	2133	0.05202	0.40431
GO:0006412	translation	1449	190	82.96	228	0.0552	0.02709
GO:0002920	regulation of humoral immune response	70	7	4.01	224	0.05667	0.02587
GO:0006949	syncytium formation	80	7	4.58	2450	0.0567	0.46528
GO:0021762	substantia nigra development	73	8	4.18	2014	0.05671	0.38462
GO:0031365	N-terminal protein amino acid modification	47	5	2.69	1659	0.05671	0.31612
GO:0046184	aldehyde biosynthetic process	21	3	1.2	1231	0.05675	0.22616
GO:0006109	regulation of carbohydrate metabolic process	262	23	15	948	0.05699	0.16813
GO:0030814	regulation of cAMP metabolic process	210	10	12.02	887	0.057	0.15901
GO:0070875	positive regulation of glycogen metabolic process	27	5	1.55	760	0.05716	0.13593
GO:0009164	nucleoside catabolic process	56	5	3.21	770	0.05722	0.13897
GO:0033139	regulation of peptidyl-serine phosphorylation of STAT protein	30	3	1.72	766	0.05724	0.13786
GO:0046174	polyol catabolic process	31	3	1.77	792	0.05724	0.14382
GO:0098543	detection of other organism	16	2	0.92	862	0.05725	0.15477
GO:0072698	protein localization to microtubule cytoskeleton	51	4	2.92	910	0.05725	0.16276
GO:0051604	protein maturation	435	34	24.91	48	0.0574	0.0018
GO:0051347	positive regulation of transferase activity	1150	72	65.84	25	0.05777	0.00027
GO:0006312	mitotic recombination	85	14	4.87	1038	0.0578	0.18366
GO:0043248	proteasome assembly	26	4	1.49	388	0.05855	0.05812
GO:0045725	positive regulation of glycogen biosynthetic process	26	4	1.49	1138	0.05855	0.20586
GO:0051924	regulation of calcium ion transport	340	19	19.47	1562	0.0589	0.29298
GO:0022616	DNA strand elongation	54	9	3.09	2087	0.05964	0.39745
GO:1901224	positive regulation of NIK/NF-kappaB signaling	49	6	2.81	2068	0.05989	0.39477
GO:0006513	protein monoubiquitination	90	7	5.15	778	0.05996	0.1401
GO:0033617	mitochondrial respiratory chain complex IV assembly	16	3	0.92	333	0.06	0.04827
GO:0071281	cellular response to iron ion	16	3	0.92	2648	0.06	0.49987
GO:0070886	positive regulation of calcineurin-NFAT signaling cascade	16	3	0.92	2206	0.06	0.42045
GO:0032786	positive regulation of DNA-templated transcription, elongation	36	4	2.06	1029	0.06001	0.18214
GO:0006635	fatty acid beta-oxidation	100	11	5.73	24	0.06026	0.00019
GO:0051262	protein tetramerization	203	19	11.62	2035	0.06407	0.38782
GO:0070301	cellular response to hydrogen peroxide	131	12	7.5	2166	0.06439	0.4126
GO:0071549	cellular response to dexamethasone stimulus	50	6	2.86	147	0.06476	0.0143
GO:0007292	female gamete generation	174	14	9.96	3023	0.06555	0.56012
GO:0060037	pharyngeal system development	42	6	2.4	1804	0.0656	0.34321
GO:0006069	ethanol oxidation	27	4	1.55	69	0.06575	0.00454
GO:0060134	prepulse inhibition	27	4	1.55	3459	0.06575	0.63023
GO:0043488	regulation of mRNA stability	265	17	15.17	515	0.0675	0.08519
GO:0090502	RNA phosphodiester bond hydrolysis, endonucleolytic	108	10	6.18	803	0.06865	0.14566
GO:0000289	nuclear-transcribed mRNA poly(A) tail shortening	76	8	4.35	531	0.06868	0.08822
GO:0006000	fructose metabolic process	27	5	1.55	815	0.06971	0.1477
GO:0071318	cellular response to ATP	17	3	0.97	3242	0.06986	0.59838
GO:0015793	glycerol transport	17	3	0.97	2547	0.06986	0.48307
GO:0043116	negative regulation of vascular permeability	17	3	0.97	2088	0.06986	0.39761
GO:0043587	tongue morphogenesis	17	3	0.97	2447	0.06986	0.46468
GO:0036010	protein localization to endosome	17	3	0.97	2858	0.06986	0.53472
GO:0006656	phosphatidylcholine biosynthetic process	51	6	2.92	2503	0.07001	0.47415
GO:0006541	glutamine metabolic process	39	5	2.23	87	0.07014	0.00733
GO:0000045	autophagosome assembly	124	9	7.1	413	0.07022	0.06325
GO:0075733	intracellular transport of virus	113	12	6.47	1083	0.07035	0.19272
GO:0015711	organic anion transport	507	25	29.03	2981	0.07053	0.55347
GO:0061351	neural precursor cell proliferation	215	8	12.31	3189	0.07056	0.58782
GO:0051289	protein homotetramerization	103	10	5.9	1304	0.0707	0.24343
GO:0044712	single-organism catabolic process	1343	95	76.89	579	0.0711	0.09986
GO:0071320	cellular response to cAMP	90	9	5.15	2948	0.07223	0.54737
GO:0015791	polyol transport	25	5	1.43	1347	0.0727	0.25079
GO:0019682	glyceraldehyde-3-phosphate metabolic process	45	5	2.58	270	0.07279	0.03608
GO:0000054	ribosomal subunit export from nucleus	28	4	1.6	61	0.07279	0.00325
GO:0006266	DNA ligation	46	4	2.63	60	0.07288	0.00312
GO:0097479	synaptic vesicle localization	203	12	11.62	2592	0.07296	0.491
GO:0007044	cell-substrate junction assembly	170	10	9.73	2200	0.07297	0.41889
GO:0015748	organophosphate ester transport	121	7	6.93	1637	0.07299	0.31235
GO:0051348	negative regulation of transferase activity	647	35	37.04	1834	0.07317	0.34902
GO:0035269	protein O-linked mannosylation	28	4	1.6	278	0.07338	0.03803
GO:0006531	aspartate metabolic process	28	4	1.6	230	0.07338	0.0273
GO:0050907	detection of chemical stimulus involved in sensory perception	474	16	27.14	1852	0.07395	0.35284
GO:0060291	long-term synaptic potentiation	92	7	5.27	1073	0.07574	0.19021
GO:0010165	response to X-ray	64	8	3.66	2787	0.07629	0.52373
GO:0031424	keratinization	78	8	4.47	2934	0.07746	0.54525
GO:0006637	acyl-CoA metabolic process	150	13	8.59	499	0.0801	0.08113
GO:0006700	C21-steroid hormone biosynthetic process	32	4	1.83	2155	0.08037	0.41005
GO:0006123	mitochondrial electron transport, cytochrome c to oxygen	18	3	1.03	76	0.0804	0.00606
GO:0051683	establishment of Golgi localization	18	3	1.03	2250	0.0804	0.42661
GO:0061084	negative regulation of protein refolding	18	3	1.03	2047	0.0804	0.39064
GO:0009215	purine deoxyribonucleoside triphosphate metabolic process	18	3	1.03	3123	0.0804	0.57551
GO:0042148	strand invasion	18	3	1.03	672	0.0804	0.11658
GO:0002643	regulation of tolerance induction	36	4	2.06	959	0.0804	0.17003
GO:0007184	SMAD protein import into nucleus	44	4	2.52	2588	0.08046	0.49039
GO:0070542	response to fatty acid	73	9	4.18	262	0.08106	0.03416
GO:0000731	DNA synthesis involved in DNA repair	145	18	8.3	975	0.08117	0.173
GO:0021542	dentate gyrus development	29	4	1.66	3461	0.08144	0.63043
GO:0044804	nucleophagy	29	4	1.66	1318	0.08144	0.2449
GO:0009235	cobalamin metabolic process	29	4	1.66	3509	0.08144	0.63677
GO:0043122	regulation of I-kappaB kinase/NF-kappaB signaling	430	16	24.62	727	0.08173	0.12706
GO:0033674	positive regulation of kinase activity	877	49	50.21	919	0.08199	0.16359
GO:0042493	response to drug	708	47	40.54	3872	0.08235	0.69885
GO:1900087	positive regulation of G1/S transition of mitotic cell cycle	41	5	2.35	2019	0.08329	0.38538
GO:0031333	negative regulation of protein complex assembly	233	20	13.34	1400	0.08405	0.26025
GO:0042273	ribosomal large subunit biogenesis	224	41	12.83	20	0.08545	9.9e-05
GO:0015992	proton transport	242	33	13.86	1840	0.08715	0.34984
GO:0033574	response to testosterone	54	6	3.09	4051	0.08718	0.72744
GO:0032774	RNA biosynthetic process	6609	398	378.4	923	0.08835	0.16398
GO:0032727	positive regulation of interferon-alpha production	30	4	1.72	2565	0.08991	0.48624
GO:0002312	B cell activation involved in immune response	111	10	6.36	1199	0.09	0.2194
GO:0002437	inflammatory response to antigenic stimulus	79	6	4.52	898	0.09004	0.16032
GO:0030099	myeloid cell differentiation	584	34	33.44	3090	0.0902	0.57069
GO:0008380	RNA splicing	728	42	41.68	3673	0.09023	0.6661
GO:0048569	post-embryonic animal organ development	37	3	2.12	3220	0.09028	0.5936
GO:0005980	glycogen catabolic process	42	5	2.4	217	0.09032	0.02461
GO:0016073	snRNA metabolic process	118	7	6.76	720	0.09035	0.12618
GO:0042476	odontogenesis	203	11	11.62	80	0.09039	0.00628
GO:0032680	regulation of tumor necrosis factor production	182	9	10.42	2375	0.09052	0.45077
GO:0006942	regulation of striated muscle contraction	153	7	8.76	1599	0.09055	0.30329
GO:0006479	protein methylation	281	12	16.09	277	0.09097	0.03792
GO:0032071	regulation of endodeoxyribonuclease activity	31	5	1.77	2153	0.09139	0.40941
GO:0009992	cellular water homeostasis	19	3	1.09	1409	0.09158	0.26334
GO:0034975	protein folding in endoplasmic reticulum	19	3	1.09	2758	0.09158	0.51918
GO:0006390	transcription from mitochondrial promoter	19	3	1.09	497	0.09158	0.08018
GO:0006626	protein targeting to mitochondrion	268	21	15.34	124	0.09275	0.01178
GO:0007131	reciprocal meiotic recombination	80	9	4.58	2908	0.09303	0.54097
GO:0006298	mismatch repair	69	8	3.95	236	0.09311	0.02894
GO:0006120	mitochondrial electron transport, NADH to ubiquinone	55	6	3.15	23	0.09338	0.00017
GO:0034260	negative regulation of GTPase activity	68	7	3.89	1763	0.09343	0.33643
GO:0046330	positive regulation of JNK cascade	212	17	12.14	3291	0.09444	0.60544
GO:0045471	response to ethanol	213	17	12.2	1931	0.0945	0.36977
GO:0045859	regulation of protein kinase activity	1264	66	72.37	458	0.09585	0.0722
GO:0043161	proteasome-mediated ubiquitin-dependent protein catabolic process	728	43	41.68	45	0.09752	0.00171
GO:0034122	negative regulation of toll-like receptor signaling pathway	43	5	2.46	4075	0.09764	0.7326
GO:0001574	ganglioside biosynthetic process	31	4	1.77	939	0.09878	0.16685
GO:0006094	gluconeogenesis	151	13	8.65	172	0.1019	0.01799
GO:0051156	glucose 6-phosphate metabolic process	57	6	3.26	2219	0.10322	0.42353
GO:0055089	fatty acid homeostasis	20	3	1.15	402	0.10335	0.06082
GO:0070914	UV-damage excision repair	20	3	1.15	375	0.10335	0.05377
GO:0048521	negative regulation of behavior	20	3	1.15	231	0.10335	0.02771
GO:0000730	DNA recombinase assembly	20	3	1.15	426	0.10335	0.06553
GO:0046325	negative regulation of glucose import	20	3	1.15	2257	0.10335	0.42806
GO:0090005	negative regulation of establishment of protein localization to plasma membrane	20	3	1.15	3064	0.10335	0.56714
GO:0060122	inner ear receptor stereocilium organization	45	4	2.58	372	0.10342	0.05343
GO:0032481	positive regulation of type I interferon production	127	12	7.27	2630	0.10455	0.49678
GO:0043029	T cell homeostasis	67	8	3.84	3535	0.10489	0.64247
GO:0071398	cellular response to fatty acid	44	5	2.52	2244	0.10525	0.42605
GO:0046487	glyoxylate metabolic process	44	5	2.52	221	0.10525	0.02544
GO:0045787	positive regulation of cell cycle	608	41	34.81	2616	0.10558	0.49459
GO:0046627	negative regulation of insulin receptor signaling pathway	57	6	3.26	2842	0.10645	0.5323
GO:0033108	mitochondrial respiratory chain complex assembly	116	14	6.64	131	0.10792	0.0122
GO:0002260	lymphocyte homeostasis	104	11	5.95	3026	0.10819	0.56074
GO:0030903	notochord development	22	3	1.26	1725	0.10859	0.32933
GO:0045657	positive regulation of monocyte differentiation	10	2	0.57	2809	0.10863	0.52694
GO:1902969	mitotic DNA replication	10	2	0.57	3629	0.10863	0.65798
GO:0060052	neurofilament cytoskeleton organization	10	2	0.57	3068	0.10863	0.56775
GO:0048478	replication fork protection	10	2	0.57	2130	0.10863	0.40395
GO:0048865	stem cell fate commitment	10	2	0.57	3206	0.10863	0.59043
GO:0006001	fructose catabolic process	10	2	0.57	158	0.10863	0.01581
GO:0060296	regulation of cilium beat frequency involved in ciliary motility	10	2	0.57	234	0.10863	0.02848
GO:0051182	coenzyme transport	10	2	0.57	68	0.10863	0.00448
GO:0039532	negative regulation of viral-induced cytoplasmic pattern recognition receptor signaling pathway	10	2	0.57	3140	0.10863	0.57886
GO:0031119	tRNA pseudouridine synthesis	10	2	0.57	479	0.10863	0.07628
GO:0044597	daunorubicin metabolic process	10	2	0.57	446	0.10863	0.07052
GO:0044598	doxorubicin metabolic process	10	2	0.57	447	0.10863	0.07052
GO:0003253	cardiac neural crest cell migration involved in outflow tract morphogenesis	10	2	0.57	482	0.10863	0.07706
GO:0014029	neural crest formation	10	2	0.57	597	0.10863	0.10331
GO:0002371	dendritic cell cytokine production	10	2	0.57	3131	0.10863	0.57668
GO:0009438	methylglyoxal metabolic process	10	2	0.57	692	0.10863	0.12142
GO:0018406	protein C-linked glycosylation via 2'-alpha-mannosyl-L-tryptophan	10	2	0.57	1378	0.10863	0.25662
GO:0046784	viral mRNA export from host cell nucleus	10	2	0.57	1574	0.10863	0.29726
GO:0006564	L-serine biosynthetic process	10	2	0.57	736	0.10863	0.12901
GO:0042256	mature ribosome assembly	10	2	0.57	974	0.10863	0.17288
GO:0002759	regulation of antimicrobial humoral response	10	2	0.57	984	0.10863	0.1734
GO:0002740	negative regulation of cytokine secretion involved in immune response	10	2	0.57	2598	0.10863	0.49239
GO:0030321	transepithelial chloride transport	10	2	0.57	297	0.10863	0.04091
GO:0045213	neurotransmitter receptor metabolic process	10	2	0.57	1667	0.10863	0.31724
GO:0034755	iron ion transmembrane transport	10	2	0.57	3028	0.10863	0.5612
GO:0032077	positive regulation of deoxyribonuclease activity	10	2	0.57	1786	0.10863	0.3403
GO:0072676	lymphocyte migration	117	4	6.7	2093	0.10912	0.39836
GO:0018022	peptidyl-lysine methylation	203	6	11.62	1285	0.10948	0.23867
GO:0010629	negative regulation of gene expression	2544	114	145.66	633	0.11054	0.11036
GO:0009066	aspartate family amino acid metabolic process	100	10	5.73	325	0.111	0.04634
GO:0006221	pyrimidine nucleotide biosynthetic process	50	7	2.86	2010	0.11101	0.38397
GO:0045070	positive regulation of viral genome replication	71	7	4.07	839	0.11109	0.15156
GO:0019400	alditol metabolic process	32	4	1.83	1555	0.11114	0.29017
GO:0051255	spindle midzone assembly	19	3	1.09	1962	0.11116	0.37666
GO:0071696	ectodermal placode development	38	4	2.18	635	0.11117	0.11061
GO:1903053	regulation of extracellular matrix organization	57	5	3.26	641	0.11117	0.11119
GO:0090049	regulation of cell migration involved in sprouting angiogenesis	40	4	2.29	2197	0.11118	0.4185
GO:0009185	ribonucleoside diphosphate metabolic process	187	12	10.71	2046	0.11121	0.39055
GO:0006705	mineralocorticoid biosynthetic process	16	2	0.92	1977	0.11122	0.37882
GO:0031657	regulation of cyclin-dependent protein serine/threonine kinase activity involved in G1/S transition ...	17	2	0.97	2397	0.11122	0.45404
GO:0010657	muscle cell apoptotic process	89	6	5.1	338	0.11123	0.04887
GO:1904591	positive regulation of protein import	154	8	8.82	2176	0.11135	0.41383
GO:0046782	regulation of viral transcription	98	4	5.61	514	0.11141	0.08474
GO:0006383	transcription from RNA polymerase III promoter	87	9	4.98	82	0.11278	0.00652
GO:0005975	carbohydrate metabolic process	924	71	52.9	135	0.113	0.01262
GO:0071480	cellular response to gamma radiation	45	5	2.58	3217	0.11315	0.59325
GO:0001782	B cell homeostasis	45	5	2.58	3846	0.11315	0.69455
GO:0050714	positive regulation of protein secretion	372	21	21.3	739	0.11429	0.1321
GO:0009890	negative regulation of biosynthetic process	2587	108	148.12	530	0.11441	0.08785
GO:0097502	mannosylation	64	8	3.66	73	0.11526	0.00568
GO:2000679	positive regulation of transcription regulatory region DNA binding	21	3	1.2	1494	0.11569	0.28071
GO:0045910	negative regulation of DNA recombination	21	3	1.2	2515	0.11569	0.4773
GO:0042473	outer ear morphogenesis	21	3	1.2	583	0.11569	0.10027
GO:0005513	detection of calcium ion	21	3	1.2	4018	0.11569	0.72306
GO:0034101	erythrocyte homeostasis	201	12	11.51	473	0.11591	0.07476
GO:0001843	neural tube closure	157	12	8.99	3047	0.1168	0.5643
GO:0019068	virion assembly	72	7	4.12	235	0.11734	0.02864
GO:0016226	iron-sulfur cluster assembly	33	4	1.89	1061	0.11769	0.18767
GO:0043393	regulation of protein binding	329	14	18.84	673	0.11914	0.11689
GO:0009615	response to virus	547	26	31.32	475	0.12005	0.07482
GO:0006418	tRNA aminoacylation for protein translation	59	6	3.38	16	0.12041	1.6e-05
GO:0005978	glycogen biosynthetic process	91	10	5.21	274	0.12073	0.03702
GO:0007254	JNK cascade	350	24	20.04	982	0.12092	0.17326
GO:0015701	bicarbonate transport	73	7	4.18	195	0.12377	0.02116
GO:0055114	oxidation-reduction process	1612	129	92.3	43	0.12427	0.00145
GO:0006259	DNA metabolic process	1726	116	98.82	2080	0.12553	0.39628
GO:0035357	peroxisome proliferator activated receptor signaling pathway	30	5	1.72	3655	0.12765	0.66255
GO:0003009	skeletal muscle contraction	67	6	3.84	3187	0.12766	0.58653
GO:0010738	regulation of protein kinase A signaling	34	4	1.95	2373	0.12769	0.45038
GO:0090004	positive regulation of establishment of protein localization to plasma membrane	60	6	3.44	3723	0.12771	0.67507
GO:2001016	positive regulation of skeletal muscle cell differentiation	11	2	0.63	136	0.12791	0.01298
GO:0051029	rRNA transport	11	2	0.63	3035	0.12791	0.56222
GO:0001682	tRNA 5'-leader removal	11	2	0.63	200	0.12791	0.02195
GO:0048290	isotype switching to IgA isotypes	11	2	0.63	796	0.12791	0.14477
GO:0051344	negative regulation of cyclic-nucleotide phosphodiesterase activity	11	2	0.63	2302	0.12791	0.43633
GO:1903401	L-lysine transmembrane transport	11	2	0.63	3499	0.12791	0.636
GO:0019673	GDP-mannose metabolic process	11	2	0.63	39	0.12791	0.00093
GO:0045075	regulation of interleukin-12 biosynthetic process	11	2	0.63	3869	0.12791	0.69835
GO:0009304	tRNA transcription	11	2	0.63	1145	0.12791	0.2069
GO:1903826	arginine transmembrane transport	11	2	0.63	3500	0.12791	0.636
GO:0018158	protein oxidation	11	2	0.63	666	0.12791	0.11526
GO:0009134	nucleoside diphosphate catabolic process	11	2	0.63	374	0.12791	0.05373
GO:0034310	primary alcohol catabolic process	11	2	0.63	981	0.12791	0.1732
GO:2000348	regulation of CD40 signaling pathway	11	2	0.63	1836	0.12791	0.34971
GO:0000972	transcription-dependent tethering of RNA polymerase II gene DNA at nuclear periphery	11	2	0.63	212	0.12791	0.02403
GO:0046549	retinal cone cell development	11	2	0.63	937	0.12791	0.16669
GO:0042760	very long-chain fatty acid catabolic process	11	2	0.63	387	0.12791	0.05798
GO:0043985	histone H4-R3 methylation	11	2	0.63	154	0.12791	0.01523
GO:0070235	regulation of activation-induced cell death of T cells	11	2	0.63	2549	0.12791	0.48342
GO:0072673	lamellipodium morphogenesis	33	3	1.89	2135	0.12795	0.40481
GO:0009303	rRNA transcription	44	6	2.52	655	0.12823	0.11376
GO:0034764	positive regulation of transmembrane transport	204	9	11.68	210	0.12847	0.02369
GO:0009151	purine deoxyribonucleotide metabolic process	22	3	1.26	2700	0.12855	0.50896
GO:0022409	positive regulation of cell-cell adhesion	437	22	25.02	3496	0.12882	0.63558
GO:0007188	adenylate cyclase-modulating G-protein coupled receptor signaling pathway	252	9	14.43	2102	0.12936	0.39999
GO:1990138	neuron projection extension	259	11	14.83	2494	0.12958	0.47288
GO:0000413	protein peptidyl-prolyl isomerization	74	7	4.24	163	0.13038	0.01647
GO:0007566	embryo implantation	88	8	5.04	895	0.13087	0.16005
GO:0071364	cellular response to epidermal growth factor stimulus	75	7	4.29	899	0.13716	0.16055
GO:0048538	thymus development	75	7	4.29	2573	0.13716	0.48732
GO:0007413	axonal fasciculation	35	4	2	3566	0.13802	0.64886
GO:0060292	long term synaptic depression	35	4	2	1635	0.13802	0.31109
GO:2000377	regulation of reactive oxygen species metabolic process	281	18	16.09	787	0.13804	0.14271
GO:0048477	oogenesis	128	9	7.33	2703	0.1381	0.50926
GO:0000463	maturation of LSU-rRNA from tricistronic rRNA transcript (SSU-rRNA, 5.8S rRNA, LSU-rRNA)	48	5	2.75	538	0.13845	0.08938
GO:0006977	DNA damage response, signal transduction by p53 class mediator resulting in cell cycle arrest	133	11	7.61	2855	0.14095	0.5346
GO:0006302	double-strand break repair	343	26	19.64	1629	0.14171	0.3098
GO:0060789	hair follicle placode formation	23	3	1.32	3388	0.14188	0.6184
GO:0048012	hepatocyte growth factor receptor signaling pathway	23	3	1.32	3054	0.14188	0.56489
GO:0036342	post-anal tail morphogenesis	23	3	1.32	1601	0.14188	0.30366
GO:0006359	regulation of transcription from RNA polymerase III promoter	42	4	2.4	282	0.1419	0.03829
GO:0045190	isotype switching	77	6	4.41	2267	0.1419	0.43039
GO:0008206	bile acid metabolic process	60	5	3.44	421	0.1419	0.06501
GO:1903214	regulation of protein targeting to mitochondrion	174	11	9.96	1165	0.14201	0.21062
GO:0007608	sensory perception of smell	469	16	26.85	1358	0.14208	0.25306
GO:0098869	cellular oxidant detoxification	147	14	8.42	186	0.14637	0.02034
GO:0001510	RNA methylation	103	14	5.9	356	0.14685	0.05121
GO:0006790	sulfur compound metabolic process	596	42	34.12	679	0.14717	0.11874
GO:0046939	nucleotide phosphorylation	180	16	10.31	877	0.14722	0.15823
GO:0046683	response to organophosphorus	228	18	13.05	357	0.14734	0.05144
GO:0001937	negative regulation of endothelial cell proliferation	49	5	2.81	3375	0.14739	0.61665
GO:0021884	forebrain neuron development	48	5	2.75	358	0.14776	0.05148
GO:0002840	regulation of T cell mediated immune response to tumor cell	23	3	1.32	924	0.14785	0.164
GO:0000018	regulation of DNA recombination	93	7	5.32	3195	0.14785	0.58909
GO:0031998	regulation of fatty acid beta-oxidation	26	3	1.49	2867	0.14788	0.536
GO:1990774	tumor necrosis factor secretion	29	3	1.66	925	0.1479	0.16407
GO:0036155	acylglycerol acyl-chain remodeling	12	2	0.69	3716	0.14791	0.67312
GO:0010579	positive regulation of adenylate cyclase activity involved in G-protein coupled receptor signaling p...	12	2	0.69	2225	0.14791	0.42386
GO:0000055	ribosomal large subunit export from nucleus	12	2	0.69	423	0.14791	0.06527
GO:0035360	positive regulation of peroxisome proliferator activated receptor signaling pathway	12	2	0.69	3019	0.14791	0.56007
GO:0044154	histone H3-K14 acetylation	12	2	0.69	2401	0.14791	0.45466
GO:0060215	primitive hemopoiesis	12	2	0.69	491	0.14791	0.07836
GO:1902093	positive regulation of flagellated sperm motility	12	2	0.69	2228	0.14791	0.42406
GO:0031118	rRNA pseudouridine synthesis	12	2	0.69	1541	0.14791	0.28736
GO:0003223	ventricular compact myocardium morphogenesis	12	2	0.69	4029	0.14791	0.72439
GO:0051835	positive regulation of synapse structural plasticity	12	2	0.69	2350	0.14791	0.44434
GO:0015684	ferrous iron transport	12	2	0.69	3517	0.14791	0.63893
GO:0006598	polyamine catabolic process	12	2	0.69	146	0.14791	0.01421
GO:0009744	response to sucrose	12	2	0.69	566	0.14791	0.09647
GO:0034127	regulation of MyD88-independent toll-like receptor signaling pathway	12	2	0.69	3615	0.14791	0.65588
GO:0017196	N-terminal peptidyl-methionine acetylation	12	2	0.69	3442	0.14791	0.62802
GO:0008090	retrograde axonal transport	12	2	0.69	137	0.14791	0.01301
GO:0032072	regulation of restriction endodeoxyribonuclease activity	12	2	0.69	926	0.14791	0.16424
GO:0043371	negative regulation of CD4-positive, alpha-beta T cell differentiation	32	3	1.83	927	0.14793	0.16447
GO:1903580	positive regulation of ATP metabolic process	32	3	1.83	1648	0.14793	0.31368
GO:0008088	axo-dendritic transport	69	5	3.95	2498	0.14795	0.47351
GO:0006182	cGMP biosynthetic process	43	3	2.46	2277	0.14803	0.43174
GO:0016125	sterol metabolic process	218	10	12.48	1007	0.1485	0.1776
GO:0048854	brain morphogenesis	57	5	3.26	191	0.14874	0.02092
GO:0060416	response to growth hormone	77	5	4.41	1279	0.14902	0.23773
GO:0046822	regulation of nucleocytoplasmic transport	370	15	21.18	1040	0.14909	0.18387
GO:0012501	programmed cell death	3204	178	183.45	1244	0.1491	0.22835
GO:0031668	cellular response to extracellular stimulus	313	14	17.92	4172	0.14915	0.7503
GO:0070509	calcium ion import	269	15	15.4	2854	0.14927	0.53452
GO:0006284	base-excision repair	63	6	3.61	148	0.15085	0.01436
GO:0001822	kidney development	438	24	25.08	1213	0.15181	0.2213
GO:0030097	hemopoiesis	1239	65	70.94	3970	0.15367	0.71456
GO:0001667	ameboidal-type cell migration	598	39	34.24	2223	0.15496	0.42379
GO:0006310	DNA recombination	445	36	25.48	398	0.15551	0.05995
GO:0010954	positive regulation of protein processing	35	4	2	2121	0.15557	0.40208
GO:0071481	cellular response to X-ray	24	3	1.37	3176	0.15565	0.58465
GO:0051457	maintenance of protein location in nucleus	24	3	1.37	407	0.15565	0.06229
GO:0007252	I-kappaB phosphorylation	24	3	1.37	4287	0.15565	0.76568
GO:0060736	prostate gland growth	24	3	1.37	2199	0.15565	0.41889
GO:0031573	intra-S DNA damage checkpoint	24	3	1.37	468	0.15565	0.07392
GO:0051899	membrane depolarization	163	10	9.33	1049	0.15585	0.18531
GO:0042104	positive regulation of activated T cell proliferation	50	5	2.86	4309	0.15657	0.76934
GO:0002183	cytoplasmic translational initiation	36	6	2.06	536	0.16182	0.08902
GO:2000058	regulation of protein ubiquitination involved in ubiquitin-dependent protein catabolic process	213	15	12.2	3171	0.16193	0.58369
GO:0090520	sphingolipid mediated signaling pathway	19	3	1.09	2881	0.16202	0.53734
GO:0018342	protein prenylation	19	2	1.09	1086	0.16212	0.19304
GO:0009125	nucleoside monophosphate catabolic process	19	2	1.09	1147	0.16212	0.20701
GO:0006829	zinc II ion transport	39	3	2.23	605	0.16213	0.10459
GO:0072175	epithelial tube formation	214	13	12.25	2504	0.16213	0.47445
GO:0070970	interleukin-2 secretion	25	2	1.43	1284	0.16215	0.23845
GO:0019359	nicotinamide nucleotide biosynthetic process	26	2	1.49	3078	0.16216	0.56916
GO:0042745	circadian sleep/wake cycle	40	2	2.29	2535	0.16224	0.48067
GO:0032634	interleukin-5 production	41	2	2.35	989	0.16224	0.17431
GO:0061013	regulation of mRNA catabolic process	53	2	3.03	2704	0.16231	0.50963
GO:0048232	male gamete generation	771	43	44.14	3244	0.16233	0.59863
GO:0055024	regulation of cardiac muscle tissue development	109	5	6.24	1473	0.16233	0.27688
GO:1903047	mitotic cell cycle process	1616	89	92.52	2611	0.16258	0.4939
GO:0040013	negative regulation of locomotion	450	19	25.76	104	0.16289	0.0096
GO:0007605	sensory perception of sound	275	20	15.75	2918	0.16316	0.54263
GO:0071353	cellular response to interleukin-4	65	6	3.72	2287	0.16724	0.43388
GO:0006839	mitochondrial transport	483	40	27.65	3907	0.16729	0.70409
GO:0008152	metabolic process	17955	1145	1028.02	171	0.16759	0.01781
GO:0040008	regulation of growth	1090	46	62.41	801	0.16832	0.14552
GO:0036462	TRAIL-activated apoptotic signaling pathway	13	2	0.74	831	0.16848	0.15021
GO:0048318	axial mesoderm development	13	2	0.74	1604	0.16848	0.30396
GO:0019371	cyclooxygenase pathway	13	2	0.74	963	0.16848	0.17052
GO:0072488	ammonium transmembrane transport	13	2	0.74	324	0.16848	0.04633
GO:0051026	chiasma assembly	13	2	0.74	1016	0.16848	0.1799
GO:0034982	mitochondrial protein processing	13	2	0.74	63	0.16848	0.00394
GO:0032425	positive regulation of mismatch repair	13	2	0.74	1782	0.16848	0.33954
GO:0035385	Roundabout signaling pathway	13	2	0.74	3754	0.16848	0.67936
GO:0033689	negative regulation of osteoblast proliferation	13	2	0.74	4278	0.16848	0.76507
GO:0086073	bundle of His cell-Purkinje myocyte adhesion involved in cell communication	13	2	0.74	1858	0.16848	0.35347
GO:0016559	peroxisome fission	13	2	0.74	1701	0.16848	0.32407
GO:0039530	MDA-5 signaling pathway	13	2	0.74	3992	0.16848	0.71775
GO:0060242	contact inhibition	13	2	0.74	3126	0.16848	0.57566
GO:0000733	DNA strand renaturation	13	2	0.74	3950	0.16848	0.71178
GO:0006108	malate metabolic process	13	2	0.74	1915	0.16848	0.367
GO:0019919	peptidyl-arginine methylation, to asymmetrical-dimethyl arginine	13	2	0.74	229	0.16848	0.02723
GO:0002309	T cell proliferation involved in immune response	13	2	0.74	4061	0.16848	0.73038
GO:0090073	positive regulation of protein homodimerization activity	13	2	0.74	3741	0.16848	0.67776
GO:0031584	activation of phospholipase D activity	13	2	0.74	1901	0.16848	0.36394
GO:2000322	regulation of glucocorticoid receptor signaling pathway	13	2	0.74	72	0.16848	0.00515
GO:0097350	neutrophil clearance	13	2	0.74	732	0.16848	0.12879
GO:0034165	positive regulation of toll-like receptor 9 signaling pathway	13	2	0.74	1783	0.16848	0.33954
GO:0045199	maintenance of epithelial cell apical/basal polarity	13	2	0.74	264	0.16848	0.03488
GO:0046548	retinal rod cell development	13	2	0.74	882	0.16848	0.1587
GO:0006685	sphingomyelin catabolic process	13	2	0.74	4099	0.16848	0.73658
GO:0017183	peptidyl-diphthamide biosynthetic process from peptidyl-histidine	13	2	0.74	1971	0.16848	0.37766
GO:0090135	actin filament branching	13	2	0.74	2344	0.16848	0.44354
GO:0070857	regulation of bile acid biosynthetic process	13	2	0.74	1715	0.16848	0.32708
GO:0044320	cellular response to leptin stimulus	34	3	1.95	2393	0.16851	0.4537
GO:0010574	regulation of vascular endothelial growth factor production	66	4	3.78	3997	0.16866	0.71872
GO:0010463	mesenchymal cell proliferation	83	4	4.75	168	0.16883	0.01746
GO:0007094	mitotic spindle assembly checkpoint	44	7	2.52	555	0.16914	0.0936
GO:0001773	myeloid dendritic cell activation	57	5	3.26	4530	0.16977	0.80001
GO:0031054	pre-miRNA processing	25	3	1.43	1870	0.16981	0.35677
GO:0007597	blood coagulation, intrinsic pathway	25	3	1.43	2160	0.16981	0.41118
GO:0034389	lipid particle organization	25	3	1.43	318	0.16981	0.04516
GO:0034198	cellular response to amino acid starvation	38	4	2.18	3458	0.1709	0.63022
GO:0003407	neural retina development	92	7	5.27	1617	0.17092	0.30772
GO:0000060	protein import into nucleus, translocation	73	5	4.18	2724	0.17118	0.51358
GO:0006953	acute-phase response	93	8	5.32	1227	0.17554	0.22537
GO:0006486	protein glycosylation	458	28	26.22	1731	0.17739	0.33032
GO:0048010	vascular endothelial growth factor receptor signaling pathway	186	12	10.65	4714	0.18009	0.82375
GO:0006879	cellular iron ion homeostasis	81	7	4.64	1775	0.18122	0.33915
GO:0000209	protein polyubiquitination	484	33	27.71	656	0.18163	0.11388
GO:0055010	ventricular cardiac muscle tissue morphogenesis	72	8	4.12	790	0.1818	0.14303
GO:1901687	glutathione derivative biosynthetic process	39	4	2.23	1992	0.18241	0.38169
GO:0032757	positive regulation of interleukin-8 production	58	5	3.32	4159	0.18244	0.74718
GO:0006110	regulation of glycolytic process	59	5	3.38	133	0.18246	0.01241
GO:0006506	GPI anchor biosynthetic process	52	9	2.98	88	0.18321	0.00738
GO:0001967	suckling behavior	26	3	1.49	4106	0.18432	0.73765
GO:0006388	tRNA splicing, via endonucleolytic cleavage and ligation	26	3	1.49	1096	0.18432	0.19496
GO:1904659	glucose transmembrane transport	26	3	1.49	3398	0.18432	0.61946
GO:0003222	ventricular trabecula myocardium morphogenesis	26	3	1.49	4570	0.18432	0.80477
GO:0019064	fusion of virus membrane with host plasma membrane	26	3	1.49	3590	0.18432	0.6525
GO:0015949	nucleobase-containing small molecule interconversion	53	5	3.03	166	0.18544	0.01723
GO:0044257	cellular protein catabolic process	1183	64	67.73	1435	0.18566	0.26912
GO:0060047	heart contraction	470	22	26.91	2301	0.18592	0.436
GO:0071482	cellular response to light stimulus	177	17	10.13	99	0.18839	0.00926
GO:0008535	respiratory chain complex IV assembly	30	5	1.72	1945	0.18909	0.37274
GO:0007127	meiosis I	170	13	9.73	283	0.18909	0.03839
GO:0036336	dendritic cell migration	68	7	3.89	3782	0.18912	0.68393
GO:0036465	synaptic vesicle recycling	49	5	2.81	2110	0.18929	0.40058
GO:0046185	aldehyde catabolic process	25	3	1.43	429	0.18941	0.06716
GO:0010656	negative regulation of muscle cell apoptotic process	45	4	2.58	3573	0.18944	0.64992
GO:0001878	response to yeast	14	2	0.8	3039	0.18948	0.56318
GO:0072307	regulation of metanephric nephron tubule epithelial cell differentiation	14	2	0.8	1495	0.18948	0.28083
GO:0060023	soft palate development	14	2	0.8	638	0.18948	0.11078
GO:0007021	tubulin complex assembly	14	2	0.8	381	0.18948	0.05525
GO:0021800	cerebral cortex tangential migration	14	2	0.8	866	0.18948	0.15564
GO:0019348	dolichol metabolic process	14	2	0.8	126	0.18948	0.01184
GO:0030952	establishment or maintenance of cytoskeleton polarity	14	2	0.8	2213	0.18948	0.42255
GO:1903430	negative regulation of cell maturation	14	2	0.8	452	0.18948	0.07129
GO:0035865	cellular response to potassium ion	14	2	0.8	1682	0.18948	0.32063
GO:0022038	corpus callosum development	14	2	0.8	818	0.18948	0.14832
GO:0060586	multicellular organismal iron ion homeostasis	14	2	0.8	1303	0.18948	0.2431
GO:0070099	regulation of chemokine-mediated signaling pathway	14	2	0.8	4574	0.18948	0.8052
GO:0006273	lagging strand elongation	14	2	0.8	2212	0.18948	0.42249
GO:0042415	norepinephrine metabolic process	14	2	0.8	613	0.18948	0.10667
GO:1902177	positive regulation of oxidative stress-induced intrinsic apoptotic signaling pathway	14	2	0.8	3983	0.18948	0.71613
GO:0098719	sodium ion import across plasma membrane	14	2	0.8	306	0.18948	0.04362
GO:0000966	RNA 5'-end processing	14	2	0.8	2385	0.18948	0.45217
GO:0006526	arginine biosynthetic process	14	2	0.8	2830	0.18948	0.53041
GO:0046689	response to mercury ion	14	2	0.8	1665	0.18948	0.31702
GO:0061439	kidney vasculature morphogenesis	14	2	0.8	795	0.18948	0.14434
GO:0034201	response to oleic acid	14	2	0.8	1595	0.18948	0.3024
GO:0030422	production of siRNA involved in RNA interference	14	2	0.8	3117	0.18948	0.57453
GO:0006995	cellular response to nitrogen starvation	14	2	0.8	960	0.18948	0.17021
GO:0050703	interleukin-1 alpha secretion	14	2	0.8	2997	0.18948	0.55631
GO:2000510	positive regulation of dendritic cell chemotaxis	14	2	0.8	4317	0.18948	0.77008
GO:0006631	fatty acid metabolic process	549	41	31.43	3219	0.19273	0.59355
GO:0045429	positive regulation of nitric oxide biosynthetic process	68	6	3.89	3255	0.19314	0.60034
GO:0097503	sialylation	40	4	2.29	1513	0.19418	0.28316
GO:0042572	retinol metabolic process	40	4	2.29	261	0.19418	0.03416
GO:0010212	response to ionizing radiation	280	23	16.03	1752	0.19504	0.33493
GO:0051436	negative regulation of ubiquitin-protein ligase activity involved in mitotic cell cycle	158	12	9.05	376	0.19519	0.05384
GO:0001975	response to amphetamine	54	5	3.09	3302	0.19547	0.60681
GO:0051881	regulation of mitochondrial membrane potential	95	7	5.44	547	0.19559	0.09098
GO:0051170	nuclear import	512	26	29.31	29	0.19574	0.00035
GO:0030224	monocyte differentiation	52	5	2.98	3919	0.19899	0.70587
GO:0006488	dolichol-linked oligosaccharide biosynthetic process	40	4	2.29	17	0.19907	5e-05
GO:0007026	negative regulation of microtubule depolymerization	27	3	1.55	1986	0.19914	0.38102
GO:0033630	positive regulation of cell adhesion mediated by integrin	27	3	1.55	3688	0.19914	0.66841
GO:0007435	salivary gland morphogenesis	65	5	3.72	677	0.19918	0.11842
GO:0010811	positive regulation of cell-substrate adhesion	196	14	11.22	700	0.20534	0.12273
GO:0045727	positive regulation of translation	169	13	9.68	1800	0.20554	0.34284
GO:0033962	cytoplasmic mRNA processing body assembly	41	4	2.35	1647	0.20616	0.31354
GO:0046835	carbohydrate phosphorylation	41	4	2.35	2924	0.20616	0.54359
GO:0001658	branching involved in ureteric bud morphogenesis	96	6	5.5	956	0.20617	0.16984
GO:0042278	purine nucleoside metabolic process	596	63	34.12	2152	0.20652	0.40929
GO:0098655	cation transmembrane transport	1145	76	65.56	1798	0.20755	0.34247
GO:0071174	mitotic spindle checkpoint	48	8	2.75	1871	0.20954	0.35692
GO:0051081	nuclear envelope disassembly	75	9	4.29	1315	0.20961	0.24483
GO:2000104	negative regulation of DNA-dependent DNA replication	42	6	2.4	848	0.20975	0.15283
GO:0009162	deoxyribonucleoside monophosphate metabolic process	18	4	1.03	415	0.20983	0.06342
GO:0033014	tetrapyrrole biosynthetic process	43	5	2.46	3694	0.20988	0.66909
GO:0009069	serine family amino acid metabolic process	83	7	4.75	1131	0.20992	0.20504
GO:0018202	peptidyl-histidine modification	17	3	0.97	347	0.20995	0.04962
GO:2000425	regulation of apoptotic cell clearance	14	2	0.8	331	0.21005	0.04801
GO:0051583	dopamine uptake involved in synaptic transmission	21	2	1.2	1396	0.2101	0.25938
GO:0002718	regulation of cytokine production involved in immune response	93	6	5.32	2644	0.21012	0.49898
GO:0039529	RIG-I signaling pathway	27	2	1.55	3955	0.21014	0.71241
GO:0006760	folic acid-containing compound metabolic process	49	3	2.81	657	0.21018	0.11403
GO:1903557	positive regulation of tumor necrosis factor superfamily cytokine production	102	6	5.84	3079	0.21018	0.5693
GO:1901984	negative regulation of protein acetylation	35	2	2	976	0.2102	0.173
GO:0071624	positive regulation of granulocyte chemotaxis	38	2	2.18	3342	0.21022	0.61159
GO:0032616	interleukin-13 production	41	2	2.35	1718	0.21024	0.32878
GO:0046425	regulation of JAK-STAT cascade	225	12	12.88	3514	0.21031	0.63802
GO:0038094	Fc-gamma receptor signaling pathway	149	7	8.53	1995	0.21039	0.38238
GO:0046323	glucose import	139	11	7.96	1887	0.21042	0.35978
GO:0061097	regulation of protein tyrosine kinase activity	123	4	7.04	3878	0.21058	0.69958
GO:0046498	S-adenosylhomocysteine metabolic process	31	4	1.77	2923	0.21059	0.54353
GO:0061549	sympathetic ganglion development	15	2	0.86	1919	0.21081	0.36794
GO:0061626	pharyngeal arch artery morphogenesis	15	2	0.86	4256	0.21081	0.76155
GO:0045924	regulation of female receptivity	15	2	0.86	2311	0.21081	0.43745
GO:0035457	cellular response to interferon-alpha	15	2	0.86	4508	0.21081	0.7975
GO:0071447	cellular response to hydroperoxide	15	2	0.86	1327	0.21081	0.24766
GO:0035280	miRNA loading onto RISC involved in gene silencing by miRNA	15	2	0.86	1900	0.21081	0.36392
GO:0035711	T-helper 1 cell activation	15	2	0.86	2055	0.21081	0.39305
GO:0006172	ADP biosynthetic process	15	2	0.86	4387	0.21081	0.78176
GO:0017055	negative regulation of RNA polymerase II transcriptional preinitiation complex assembly	15	2	0.86	384	0.21081	0.05618
GO:0006782	protoporphyrinogen IX biosynthetic process	15	2	0.86	162	0.21081	0.01644
GO:0022417	protein maturation by protein folding	15	2	0.86	4406	0.21081	0.78424
GO:2000210	positive regulation of anoikis	15	2	0.86	2705	0.21081	0.50985
GO:1902576	negative regulation of nuclear cell cycle DNA replication	15	2	0.86	511	0.21081	0.08438
GO:0048069	eye pigmentation	15	2	0.86	4357	0.21081	0.77632
GO:0061299	retina vasculature morphogenesis in camera-type eye	15	2	0.86	2633	0.21081	0.49736
GO:0010269	response to selenium ion	15	2	0.86	408	0.21081	0.06234
GO:0034340	response to type I interferon	142	3	8.13	3830	0.21084	0.69247
GO:0050716	positive regulation of interleukin-1 secretion	48	3	2.75	385	0.211	0.05632
GO:0046622	positive regulation of organ growth	64	3	3.66	2405	0.21119	0.45512
GO:0006665	sphingolipid metabolic process	246	13	14.08	2463	0.21128	0.46769
GO:0006820	anion transport	743	34	42.54	903	0.2113	0.16146
GO:0003279	cardiac septum development	163	7	9.33	1854	0.21154	0.353
GO:0051169	nuclear transport	833	44	47.69	599	0.21185	0.10362
GO:0001755	neural crest cell migration	95	9	5.44	3687	0.21282	0.6684
GO:0007494	midgut development	28	3	1.6	600	0.21423	0.10366
GO:0043162	ubiquitin-dependent protein catabolic process via the multivesicular body sorting pathway	28	3	1.6	2399	0.21423	0.45463
GO:0036066	protein O-linked fucosylation	28	3	1.6	561	0.21423	0.09567
GO:0061436	establishment of skin barrier	28	3	1.6	4090	0.21423	0.73565
GO:0043981	histone H4-K5 acetylation	28	3	1.6	2168	0.21423	0.41281
GO:0043982	histone H4-K8 acetylation	28	3	1.6	2169	0.21423	0.41281
GO:0048585	negative regulation of response to stimulus	2302	115	131.8	4645	0.21489	0.81473
GO:0006805	xenobiotic metabolic process	157	12	8.99	680	0.21528	0.11891
GO:0033673	negative regulation of kinase activity	440	20	25.19	643	0.21607	0.11127
GO:2000243	positive regulation of reproductive process	70	6	4.01	2435	0.21823	0.46141
GO:0071157	negative regulation of cell cycle arrest	42	4	2.4	1569	0.21836	0.2954
GO:0000729	DNA double-strand break processing	42	4	2.4	3245	0.21836	0.59872
GO:0031954	positive regulation of protein autophosphorylation	42	4	2.4	5055	0.21836	0.86615
GO:0048747	muscle fiber development	96	6	5.5	1925	0.21872	0.36879
GO:0048208	COPII vesicle coating	116	9	6.64	94	0.22013	0.00849
GO:0006874	cellular calcium ion homeostasis	631	29	36.13	2185	0.22535	0.41641
GO:0047496	vesicle transport along microtubule	55	4	3.15	3127	0.22969	0.57569
GO:0019915	lipid storage	100	5	5.73	2749	0.23015	0.51796
GO:0045648	positive regulation of erythrocyte differentiation	43	4	2.46	1627	0.23074	0.30946
GO:0006903	vesicle targeting	139	11	7.96	1280	0.23192	0.238
GO:0006071	glycerol metabolic process	26	3	1.49	1677	0.23226	0.31926
GO:0099504	synaptic vesicle cycle	170	11	9.73	3365	0.23232	0.61436
GO:0009226	nucleotide-sugar biosynthetic process	31	3	1.77	252	0.23233	0.03232
GO:1901897	regulation of relaxation of cardiac muscle	16	2	0.92	2769	0.23236	0.52098
GO:0060027	convergent extension involved in gastrulation	16	2	0.92	558	0.23236	0.09402
GO:1901678	iron coordination entity transport	16	2	0.92	1467	0.23236	0.27614
GO:0000012	single strand break repair	16	2	0.92	1206	0.23236	0.22038
GO:0003376	sphingosine-1-phosphate signaling pathway	16	2	0.92	1669	0.23236	0.31806
GO:0060732	positive regulation of inositol phosphate biosynthetic process	16	2	0.92	1670	0.23236	0.31834
GO:0015871	choline transport	16	2	0.92	3467	0.23236	0.6316
GO:0060501	positive regulation of epithelial cell proliferation involved in lung morphogenesis	16	2	0.92	4568	0.23236	0.80464
GO:0045078	positive regulation of interferon-gamma biosynthetic process	16	2	0.92	1826	0.23236	0.34677
GO:0051561	positive regulation of mitochondrial calcium ion concentration	16	2	0.92	2872	0.23236	0.53662
GO:0034379	very-low-density lipoprotein particle assembly	16	2	0.92	4681	0.23236	0.81994
GO:0033353	S-adenosylmethionine cycle	16	2	0.92	3211	0.23236	0.59203
GO:0014842	regulation of skeletal muscle satellite cell proliferation	16	2	0.92	1413	0.23236	0.26376
GO:0008406	gonad development	339	20	19.41	1333	0.23247	0.24835
GO:0009620	response to fungus	62	4	3.55	997	0.2325	0.17559
GO:1903363	negative regulation of cellular protein catabolic process	82	5	4.69	1179	0.23253	0.21445
GO:0021799	cerebral cortex radially oriented cell migration	51	3	2.92	3340	0.23258	0.61143
GO:0033619	membrane protein proteolysis	87	4	4.98	816	0.23282	0.14772
GO:0003158	endothelium development	183	8	10.48	637	0.23316	0.11074
GO:0051017	actin filament bundle assembly	215	13	12.31	4547	0.23768	0.80254
GO:0043170	macromolecule metabolic process	14909	907	853.62	3027	0.23785	0.56091
GO:0008630	intrinsic apoptotic signaling pathway in response to DNA damage	193	15	11.05	4383	0.23834	0.78109
GO:0002755	MyD88-dependent toll-like receptor signaling pathway	73	6	4.18	5081	0.2393	0.86908
GO:0016241	regulation of macroautophagy	206	11	11.79	3894	0.24048	0.70181
GO:0008033	tRNA processing	175	23	10.02	544	0.24152	0.09043
GO:0051602	response to electrical stimulus	61	6	3.49	3552	0.24292	0.64568
GO:0034614	cellular response to reactive oxygen species	220	20	12.6	1855	0.24321	0.35311
GO:0007095	mitotic G2 DNA damage checkpoint	30	3	1.72	3352	0.24507	0.61261
GO:0046339	diacylglycerol metabolic process	30	3	1.72	3313	0.24507	0.60854
GO:1990090	cellular response to nerve growth factor stimulus	74	6	4.24	1681	0.24805	0.32051
GO:0051898	negative regulation of protein kinase B signaling	59	5	3.38	1337	0.24811	0.24947
GO:0035666	TRIF-dependent toll-like receptor signaling pathway	59	5	3.38	4839	0.24811	0.8404
GO:0032735	positive regulation of interleukin-12 production	74	6	4.24	5265	0.24891	0.89134
GO:0007368	determination of left/right symmetry	179	12	10.25	4989	0.24891	0.85955
GO:0071346	cellular response to interferon-gamma	242	11	13.86	2497	0.25004	0.47346
GO:0005977	glycogen metabolic process	130	14	7.44	897	0.25269	0.16015
GO:0006650	glycerophospholipid metabolic process	468	31	26.8	1268	0.25325	0.23468
GO:0031639	plasminogen activation	35	4	2	1923	0.25379	0.3686
GO:0035195	gene silencing by miRNA	107	8	6.13	2023	0.25382	0.38612
GO:0006448	regulation of translational elongation	41	4	2.35	954	0.25387	0.16973
GO:0008215	spermine metabolic process	17	2	0.97	79	0.25402	0.00619
GO:0071499	cellular response to laminar fluid shear stress	17	2	0.97	3571	0.25402	0.64946
GO:0000447	endonucleolytic cleavage in ITS1 to separate SSU-rRNA from 5.8S rRNA and LSU-rRNA from tricistronic ...	17	2	0.97	3976	0.25402	0.71524
GO:0051177	meiotic sister chromatid cohesion	17	2	0.97	4139	0.25402	0.74352
GO:0043353	enucleate erythrocyte differentiation	17	2	0.97	4738	0.25402	0.82638
GO:0071257	cellular response to electrical stimulus	17	2	0.97	3840	0.25402	0.69376
GO:0051256	mitotic spindle midzone assembly	17	2	0.97	1611	0.25402	0.30582
GO:0060699	regulation of endoribonuclease activity	17	2	0.97	269	0.25402	0.03601
GO:0042416	dopamine biosynthetic process	17	2	0.97	3693	0.25402	0.66899
GO:0070475	rRNA base methylation	17	2	0.97	22	0.25402	0.00013
GO:1901298	regulation of hydrogen peroxide-mediated programmed cell death	17	2	0.97	1993	0.25402	0.38181
GO:0001959	regulation of cytokine-mediated signaling pathway	239	12	13.68	858	0.25468	0.15443
GO:0016052	carbohydrate catabolic process	259	19	14.83	2310	0.25482	0.43738
GO:0072431	signal transduction involved in mitotic G1 DNA damage checkpoint	138	12	7.9	4300	0.25484	0.7676
GO:0071428	rRNA-containing ribonucleoprotein complex export from nucleus	33	5	1.89	3942	0.25498	0.70999
GO:0043524	negative regulation of neuron apoptotic process	276	19	15.8	4963	0.25502	0.85601
GO:0046849	bone remodeling	129	4	7.39	4154	0.25508	0.7458
GO:0010421	hydrogen peroxide-mediated programmed cell death	22	3	1.26	3791	0.25519	0.68549
GO:0045619	regulation of lymphocyte differentiation	236	15	13.51	2651	0.25522	0.50042
GO:0098815	modulation of excitatory postsynaptic potential	65	5	3.72	2559	0.25525	0.48565
GO:0021564	vagus nerve development	16	2	0.92	272	0.25528	0.03696
GO:0001840	neural plate development	21	2	1.2	3874	0.25532	0.69904
GO:0021885	forebrain cell migration	109	7	6.24	3014	0.25533	0.55865
GO:0040034	regulation of development, heterochronic	22	2	1.26	109	0.25533	0.01013
GO:0061333	renal tubule morphogenesis	118	7	6.76	2640	0.25541	0.49866
GO:0042133	neurotransmitter metabolic process	53	3	3.03	3842	0.25545	0.69392
GO:0061008	hepaticobiliary system development	215	12	12.31	4488	0.25549	0.79566
GO:0043066	negative regulation of apoptotic process	1472	87	84.28	2180	0.25559	0.41469
GO:0006325	chromatin organization	1204	37	68.94	1340	0.25561	0.24982
GO:0030888	regulation of B cell proliferation	90	4	5.15	3776	0.25561	0.6833
GO:0006171	cAMP biosynthetic process	193	9	11.05	1095	0.25574	0.19428
GO:0090087	regulation of peptide transport	339	17	19.41	448	0.2558	0.07114
GO:0001502	cartilage condensation	45	4	2.58	67	0.25599	0.00446
GO:2000463	positive regulation of excitatory postsynaptic potential	45	4	2.58	4908	0.25599	0.84938
GO:0070423	nucleotide-binding oligomerization domain containing signaling pathway	66	5	3.78	4440	0.25606	0.78997
GO:0071230	cellular response to amino acid stimulus	90	7	5.15	2005	0.25642	0.38349
GO:0045740	positive regulation of DNA replication	112	8	6.41	1469	0.25656	0.27622
GO:0030323	respiratory tube development	314	10	17.98	3696	0.25663	0.66922
GO:0050804	modulation of synaptic transmission	499	18	28.57	4245	0.25685	0.76031
GO:0031344	regulation of cell projection organization	895	37	51.24	3178	0.25761	0.58497
GO:0001662	behavioral fear response	75	6	4.29	2982	0.25863	0.55357
GO:0032733	positive regulation of interleukin-10 production	70	6	4.01	2261	0.25887	0.42855
GO:0043542	endothelial cell migration	285	21	16.32	4637	0.25964	0.81408
GO:0071158	positive regulation of cell cycle arrest	164	14	9.39	3712	0.25967	0.67282
GO:0010823	negative regulation of mitochondrion organization	82	6	4.69	559	0.26072	0.09465
GO:1902236	negative regulation of endoplasmic reticulum stress-induced intrinsic apoptotic signaling pathway	31	3	1.77	1769	0.26074	0.33747
GO:0030277	maintenance of gastrointestinal epithelium	31	3	1.77	294	0.26074	0.03992
GO:0008631	intrinsic apoptotic signaling pathway in response to oxidative stress	91	5	5.21	4553	0.2612	0.80309
GO:0006355	regulation of transcription, DNA-templated	5809	278	332.6	2254	0.26476	0.42707
GO:0051897	positive regulation of protein kinase B signaling	138	10	7.9	5372	0.26677	0.90331
GO:0070887	cellular response to chemical stimulus	4442	209	254.33	506	0.26731	0.08255
GO:0048791	calcium ion-regulated exocytosis of neurotransmitter	46	4	2.63	945	0.26881	0.16809
GO:0031648	protein destabilization	61	5	3.49	922	0.27011	0.16394
GO:0042100	B cell proliferation	151	9	8.65	512	0.27061	0.08456
GO:0032868	response to insulin	416	21	23.82	1547	0.27063	0.2883
GO:0032956	regulation of actin cytoskeleton organization	480	26	27.48	3898	0.27144	0.70248
GO:0006518	peptide metabolic process	1719	204	98.42	545	0.27395	0.09043
GO:0090305	nucleic acid phosphodiester bond hydrolysis	489	39	28	1122	0.27435	0.20269
GO:0043534	blood vessel endothelial cell migration	146	13	8.36	1704	0.27479	0.32497
GO:0034219	carbohydrate transmembrane transport	44	5	2.52	4336	0.27534	0.77289
GO:0021545	cranial nerve development	80	7	4.58	1671	0.27536	0.31851
GO:0060487	lung epithelial cell differentiation	41	4	2.35	4251	0.27555	0.76082
GO:0010831	positive regulation of myotube differentiation	52	4	2.98	1252	0.27571	0.23047
GO:0071360	cellular response to exogenous dsRNA	18	2	1.03	2304	0.27573	0.43651
GO:0000185	activation of MAPKKK activity	18	2	1.03	1976	0.27573	0.37869
GO:1904871	positive regulation of protein localization to Cajal body	18	2	1.03	165	0.27573	0.01656
GO:0048664	neuron fate determination	18	2	1.03	4871	0.27573	0.84446
GO:2001200	positive regulation of dendritic cell differentiation	18	2	1.03	4235	0.27573	0.759
GO:0060684	epithelial-mesenchymal cell signaling	18	2	1.03	1349	0.27573	0.25087
GO:1904953	Wnt signaling pathway involved in midbrain dopaminergic neuron differentiation	18	2	1.03	2801	0.27573	0.52585
GO:0006851	mitochondrial calcium ion transport	18	2	1.03	1859	0.27573	0.35349
GO:0009223	pyrimidine deoxyribonucleotide catabolic process	18	2	1.03	485	0.27573	0.07774
GO:0042711	maternal behavior	18	2	1.03	5307	0.27573	0.8954
GO:0072015	glomerular visceral epithelial cell development	18	2	1.03	1539	0.27573	0.28705
GO:0033762	response to glucagon	76	5	4.35	3489	0.27581	0.63464
GO:0051693	actin filament capping	60	4	3.44	2912	0.27583	0.54156
GO:0014075	response to amine	86	8	4.92	1613	0.27591	0.30634
GO:1990778	protein localization to cell periphery	378	21	21.64	192	0.27614	0.02093
GO:0009880	embryonic pattern specification	91	7	5.21	1835	0.27633	0.34956
GO:0010971	positive regulation of G2/M transition of mitotic cell cycle	32	3	1.83	481	0.27654	0.07694
GO:0044272	sulfur compound biosynthetic process	334	20	19.12	1742	0.27663	0.33272
GO:0060828	regulation of canonical Wnt signaling pathway	406	19	23.25	1527	0.27834	0.28548
GO:1900026	positive regulation of substrate adhesion-dependent cell spreading	77	6	4.41	3262	0.27835	0.60118
GO:0070979	protein K11-linked ubiquitination	77	6	4.41	1929	0.27835	0.36965
GO:0006400	tRNA modification	108	15	6.18	2437	0.27878	0.46172
GO:0030199	collagen fibril organization	62	5	3.55	4244	0.28126	0.75997
GO:0010557	positive regulation of macromolecule biosynthetic process	2716	136	155.51	1580	0.2815	0.29854
GO:0032008	positive regulation of TOR signaling	47	4	2.69	517	0.28175	0.08527
GO:0019432	triglyceride biosynthetic process	77	5	4.41	4799	0.28203	0.83469
GO:0007020	microtubule nucleation	33	3	1.89	3055	0.29242	0.56506
GO:0047497	mitochondrion transport along microtubule	33	3	1.89	621	0.29242	0.10874
GO:0007250	activation of NF-kappaB-inducing kinase activity	33	3	1.89	4275	0.29242	0.76468
GO:0043153	entrainment of circadian clock by photoperiod	33	3	1.89	2147	0.29242	0.40701
GO:0030150	protein import into mitochondrial matrix	33	3	1.89	1526	0.29242	0.2853
GO:0070207	protein homotrimerization	33	3	1.89	3745	0.29242	0.67835
GO:0014850	response to muscle activity	33	3	1.89	3909	0.29242	0.70426
GO:0035176	social behavior	94	7	5.38	399	0.29243	0.06039
GO:0061621	canonical glycolysis	63	5	3.61	489	0.2925	0.07817
GO:0006082	organic acid metabolic process	1540	119	88.17	119	0.29265	0.01122
GO:0043280	positive regulation of cysteine-type endopeptidase activity involved in apoptotic process	218	12	12.48	5043	0.29337	0.86526
GO:1901575	organic substance catabolic process	3447	277	197.36	2775	0.29362	0.5224
GO:0006470	protein dephosphorylation	489	19	28	3664	0.29489	0.66478
GO:0032147	activation of protein kinase activity	530	31	30.35	4064	0.29533	0.73136
GO:0042594	response to starvation	230	12	13.17	3895	0.29576	0.70187
GO:0032874	positive regulation of stress-activated MAPK cascade	250	21	14.31	1087	0.29583	0.19318
GO:1903509	liposaccharide metabolic process	188	19	10.76	2445	0.29671	0.46427
GO:0009247	glycolipid biosynthetic process	102	14	5.84	4721	0.29673	0.82427
GO:0000038	very long-chain fatty acid metabolic process	43	5	2.46	202	0.29696	0.0223
GO:0006783	heme biosynthetic process	34	4	1.95	362	0.29709	0.05182
GO:0019319	hexose biosynthetic process	157	14	8.99	1265	0.29725	0.23373
GO:0070525	tRNA threonylcarbamoyladenosine metabolic process	24	6	1.37	807	0.29732	0.14598
GO:0007099	centriole replication	52	4	2.98	3624	0.29736	0.65742
GO:0048568	embryonic organ development	700	27	40.08	5414	0.29738	0.90692
GO:0008354	germ cell migration	19	2	1.09	5041	0.29739	0.86501
GO:0045653	negative regulation of megakaryocyte differentiation	19	2	1.09	698	0.29739	0.12225
GO:0033234	negative regulation of protein sumoylation	19	2	1.09	1099	0.29739	0.19641
GO:0043097	pyrimidine nucleoside salvage	19	2	1.09	1631	0.29739	0.31018
GO:0071468	cellular response to acidic pH	19	2	1.09	2784	0.29739	0.52321
GO:0003334	keratinocyte development	19	2	1.09	1535	0.29739	0.28652
GO:0051106	positive regulation of DNA ligation	19	2	1.09	3231	0.29739	0.59562
GO:0000244	spliceosomal tri-snRNP complex assembly	19	2	1.09	208	0.29739	0.02346
GO:0051782	negative regulation of cell division	19	2	1.09	3904	0.29739	0.70345
GO:0051599	response to hydrostatic pressure	19	2	1.09	366	0.29739	0.0523
GO:0051657	maintenance of organelle location	19	2	1.09	4199	0.29739	0.75484
GO:0042407	cristae formation	19	2	1.09	121	0.29739	0.01138
GO:0042118	endothelial cell activation	19	2	1.09	2283	0.29739	0.4331
GO:0009820	alkaloid metabolic process	19	2	1.09	2596	0.29739	0.49204
GO:0010155	regulation of proton transport	19	2	1.09	3600	0.29739	0.65357
GO:0032099	negative regulation of appetite	19	2	1.09	220	0.29739	0.02515
GO:0044275	cellular carbohydrate catabolic process	80	7	4.58	742	0.29769	0.13248
GO:0030042	actin filament depolymerization	84	7	4.81	4290	0.29772	0.7662
GO:0051489	regulation of filopodium assembly	60	3	3.44	5004	0.29775	0.86159
GO:0060633	negative regulation of transcription initiation from RNA polymerase II promoter	21	3	1.2	1602	0.29779	0.30374
GO:0044321	response to leptin	40	4	2.29	4048	0.2978	0.72698
GO:0018195	peptidyl-arginine modification	30	3	1.72	1643	0.29788	0.3129
GO:1903038	negative regulation of leukocyte cell-cell adhesion	175	9	10.02	2415	0.29791	0.45657
GO:0060143	positive regulation of syncytium formation by plasma membrane fusion	34	3	1.95	4121	0.29791	0.74049
GO:0010935	regulation of macrophage cytokine production	17	2	0.97	1584	0.29792	0.29934
GO:0015669	gas transport	24	2	1.37	1749	0.29799	0.33428
GO:0032800	receptor biosynthetic process	44	3	2.52	2888	0.29801	0.53854
GO:0001660	fever generation	27	2	1.55	1314	0.29801	0.24464
GO:0046040	IMP metabolic process	27	2	1.55	4010	0.29801	0.72106
GO:0034698	response to gonadotropin	36	2	2.06	881	0.2981	0.15867
GO:0044091	membrane biogenesis	57	3	3.26	2195	0.29813	0.41838
GO:0071331	cellular response to hexose stimulus	181	10	10.36	2456	0.29815	0.46638
GO:0010522	regulation of calcium ion transport into cytosol	156	8	8.93	4667	0.29825	0.81805
GO:0051350	negative regulation of lyase activity	57	2	3.26	2530	0.2983	0.47986
GO:0043266	regulation of potassium ion transport	132	6	7.56	3771	0.29835	0.68307
GO:0002790	peptide secretion	404	18	23.13	1309	0.29896	0.24387
GO:0030326	embryonic limb morphogenesis	214	11	12.25	3946	0.29982	0.71137
GO:0007599	hemostasis	588	23	33.67	378	0.2999	0.05433
GO:0031398	positive regulation of protein ubiquitination	345	24	19.75	3781	0.30007	0.68392
GO:0006661	phosphatidylinositol biosynthetic process	217	18	12.42	1515	0.30182	0.28352
GO:0010595	positive regulation of endothelial cell migration	113	9	6.47	3804	0.30326	0.68816
GO:0014911	positive regulation of smooth muscle cell migration	64	5	3.66	2970	0.30382	0.55118
GO:0032689	negative regulation of interferon-gamma production	64	5	3.66	5388	0.30382	0.90485
GO:0009719	response to endogenous stimulus	2642	117	151.27	1236	0.30439	0.22659
GO:0008283	cell proliferation	3319	172	190.03	2325	0.307	0.43975
GO:0042474	middle ear morphogenesis	34	3	1.95	3116	0.30836	0.57447
GO:0034138	toll-like receptor 3 signaling pathway	34	3	1.95	2959	0.30836	0.55031
GO:2001234	negative regulation of apoptotic signaling pathway	365	19	20.9	1825	0.30942	0.34669
GO:0016311	dephosphorylation	759	30	43.46	3060	0.31267	0.56627
GO:0000082	G1/S transition of mitotic cell cycle	456	31	26.11	3132	0.31621	0.57678
GO:0071229	cellular response to acid chemical	267	21	15.29	1106	0.31758	0.19786
GO:0030182	neuron differentiation	2035	91	116.51	2423	0.31821	0.4593
GO:0043586	tongue development	37	5	2.12	852	0.31838	0.15331
GO:0031047	gene silencing by RNA	243	17	13.91	239	0.31867	0.02986
GO:0006959	humoral immune response	256	16	14.66	3903	0.31872	0.7034
GO:0042059	negative regulation of epidermal growth factor receptor signaling pathway	103	7	5.9	2201	0.31885	0.41913
GO:0045063	T-helper 1 cell differentiation	37	3	2.12	3016	0.31894	0.55901
GO:0048387	negative regulation of retinoic acid receptor signaling pathway	20	2	1.15	4131	0.31895	0.74271
GO:0007097	nuclear migration	20	2	1.15	3345	0.31895	0.61179
GO:0002934	desmosome organization	20	2	1.15	780	0.31895	0.14096
GO:0007342	fusion of sperm to egg plasma membrane	20	2	1.15	3998	0.31895	0.71932
GO:0007171	activation of transmembrane receptor protein tyrosine kinase activity	20	2	1.15	3885	0.31895	0.70028
GO:0071276	cellular response to cadmium ion	20	2	1.15	5164	0.31895	0.8798
GO:0006516	glycoprotein catabolic process	20	2	1.15	1028	0.31895	0.18212
GO:0060765	regulation of androgen receptor signaling pathway	42	3	2.4	1187	0.31902	0.21662
GO:0009611	response to wounding	1098	50	62.87	3529	0.31945	0.64116
GO:0002067	glandular epithelial cell differentiation	74	3	4.24	2928	0.31954	0.54418
GO:0001952	regulation of cell-matrix adhesion	180	8	10.31	4267	0.31984	0.76359
GO:0001709	cell fate determination	68	6	3.89	5286	0.32062	0.89334
GO:1902230	negative regulation of intrinsic apoptotic signaling pathway in response to DNA damage	50	4	2.86	2433	0.32103	0.46108
GO:0010038	response to metal ion	525	37	30.06	2144	0.32214	0.40648
GO:0000956	nuclear-transcribed mRNA catabolic process	666	117	38.13	3647	0.32338	0.6611
GO:0051443	positive regulation of ubiquitin-protein transferase activity	213	15	12.2	1429	0.32367	0.26765
GO:0019058	viral life cycle	1093	138	62.58	4201	0.32381	0.75524
GO:0048488	synaptic vesicle endocytosis	35	3	2	3225	0.32433	0.59421
GO:0002092	positive regulation of receptor internalization	35	3	2	2742	0.32433	0.51682
GO:0035902	response to immobilization stress	35	3	2	2299	0.32433	0.43593
GO:0006611	protein export from nucleus	95	4	5.44	52	0.32522	0.00207
GO:0010332	response to gamma radiation	111	10	6.36	5331	0.32545	0.89784
GO:0043603	cellular amide metabolic process	1940	218	111.08	932	0.32669	0.16508
GO:0046034	ATP metabolic process	394	45	22.56	2848	0.32738	0.53398
GO:0009408	response to heat	289	18	16.55	1546	0.32886	0.28775
GO:0006303	double-strand break repair via nonhomologous end joining	114	8	6.53	2951	0.32892	0.54807
GO:0009749	response to glucose	289	17	16.55	2508	0.32958	0.47514
GO:1900034	regulation of cellular response to heat	147	10	8.42	2295	0.33369	0.4354
GO:0006687	glycosphingolipid metabolic process	116	8	6.64	5340	0.3341	0.8983
GO:0007339	binding of sperm to zona pellucida	51	4	2.92	440	0.33423	0.06975
GO:0016053	organic acid biosynthetic process	432	29	24.73	1247	0.3375	0.22927
GO:0031098	stress-activated protein kinase signaling cascade	460	30	26.34	4273	0.33761	0.76425
GO:0021783	preganglionic parasympathetic fiber development	32	4	1.83	4353	0.3379	0.77592
GO:0035358	regulation of peroxisome proliferator activated receptor signaling pathway	19	3	1.09	1679	0.33794	0.3196
GO:0061005	cell differentiation involved in kidney development	90	7	5.15	1066	0.33795	0.18835
GO:0009649	entrainment of circadian clock	40	4	2.29	3030	0.33798	0.56147
GO:0043628	ncRNA 3'-end processing	30	3	1.72	546	0.33806	0.09098
GO:0086091	regulation of heart rate by cardiac conduction	67	5	3.84	3102	0.33811	0.57259
GO:0048536	spleen development	67	5	3.84	5231	0.33811	0.88792
GO:0010755	regulation of plasminogen activation	18	2	1.03	696	0.33812	0.12214
GO:0045161	neuronal ion channel clustering	20	2	1.15	2202	0.33814	0.41928
GO:0035745	T-helper 2 cell cytokine production	22	2	1.26	5005	0.33816	0.86165
GO:0003143	embryonic heart tube morphogenesis	97	6	5.55	835	0.33821	0.15039
GO:1902742	apoptotic process involved in development	54	3	3.09	1819	0.33831	0.34478
GO:0009913	epidermal cell differentiation	291	16	16.66	4665	0.33842	0.81766
GO:0046545	development of primary female sexual characteristics	156	8	8.93	4456	0.33846	0.79174
GO:0003170	heart valve development	70	2	4.01	1717	0.33866	0.32787
GO:1900372	negative regulation of purine nucleotide biosynthetic process	76	2	4.35	3093	0.33872	0.57127
GO:0043279	response to alkaloid	237	11	13.57	2042	0.33877	0.38895
GO:0007050	cell cycle arrest	436	31	24.96	5096	0.33879	0.87091
GO:0046474	glycerophospholipid biosynthetic process	301	23	17.23	334	0.33888	0.04857
GO:0034103	regulation of tissue remodeling	119	3	6.81	132	0.33899	0.01233
GO:0015833	peptide transport	424	20	24.28	5284	0.33909	0.89314
GO:0006821	chloride transport	174	5	9.96	586	0.33921	0.10146
GO:1901617	organic hydroxy compound biosynthetic process	269	18	15.4	610	0.33982	0.10637
GO:0071498	cellular response to fluid shear stress	38	4	2.18	4341	0.34005	0.77372
GO:0030836	positive regulation of actin filament depolymerization	21	2	1.2	2533	0.34035	0.48035
GO:0045630	positive regulation of T-helper 2 cell differentiation	21	2	1.2	5306	0.34035	0.89531
GO:0060081	membrane hyperpolarization	21	2	1.2	1214	0.34035	0.22144
GO:0019321	pentose metabolic process	21	2	1.2	3202	0.34035	0.58984
GO:0000050	urea cycle	21	2	1.2	2443	0.34035	0.46383
GO:0000052	citrulline metabolic process	21	2	1.2	1442	0.34035	0.2705
GO:0060456	positive regulation of digestive system process	21	2	1.2	89	0.34035	0.00748
GO:0002043	blood vessel endothelial cell proliferation involved in sprouting angiogenesis	21	2	1.2	2793	0.34035	0.52436
GO:0015693	magnesium ion transport	21	2	1.2	1985	0.34035	0.38064
GO:0090051	negative regulation of cell migration involved in sprouting angiogenesis	21	2	1.2	5125	0.34035	0.87475
GO:0044319	wound healing, spreading of cells	46	3	2.63	3966	0.34047	0.71389
GO:2000826	regulation of heart morphogenesis	48	3	2.75	2154	0.34051	0.40975
GO:0016601	Rac protein signal transduction	63	4	3.61	3349	0.34051	0.6124
GO:0001836	release of cytochrome c from mitochondria	110	5	6.3	5467	0.34096	0.91117
GO:0070588	calcium ion transmembrane transport	440	25	25.19	4659	0.34414	0.81702
GO:0009311	oligosaccharide metabolic process	106	7	6.07	2985	0.34748	0.55439
GO:0010506	regulation of autophagy	476	30	27.25	5835	0.34864	0.94552
GO:0045445	myoblast differentiation	125	5	7.16	1961	0.34887	0.37653
GO:0070374	positive regulation of ERK1 and ERK2 cascade	315	20	18.04	5592	0.34909	0.92401
GO:0006629	lipid metabolic process	2128	134	121.84	4556	0.35036	0.80323
GO:0048870	cell motility	2264	97	129.63	263	0.35097	0.03484
GO:0051437	positive regulation of ubiquitin-protein ligase activity involved in regulation of mitotic cell cycl...	166	11	9.5	355	0.35313	0.05112
GO:0015758	glucose transport	266	24	15.23	3270	0.35319	0.60306
GO:0006098	pentose-phosphate shunt	37	3	2.12	500	0.35624	0.08136
GO:0051131	chaperone-mediated protein complex assembly	37	3	2.12	769	0.35624	0.13883
GO:0042346	positive regulation of NF-kappaB import into nucleus	37	3	2.12	5694	0.35624	0.93284
GO:0042744	hydrogen peroxide catabolic process	37	3	2.12	44	0.35624	0.00149
GO:0044281	small molecule metabolic process	3107	252	177.89	209	0.35953	0.02357
GO:0046033	AMP metabolic process	35	5	2	3862	0.36084	0.69659
GO:0043967	histone H4 acetylation	114	8	6.53	560	0.36093	0.09489
GO:0030837	negative regulation of actin filament polymerization	94	7	5.38	1686	0.36126	0.32191
GO:0006833	water transport	35	3	2	4826	0.36145	0.8389
GO:0000469	cleavage involved in rRNA processing	54	4	3.09	55	0.36148	0.00252
GO:0006613	cotranslational protein targeting to membrane	496	101	28.4	1490	0.36149	0.28028
GO:0071340	skeletal muscle acetylcholine-gated channel clustering	22	2	1.26	775	0.36153	0.13968
GO:0016558	protein import into peroxisome matrix	22	2	1.26	1517	0.36153	0.28363
GO:0048535	lymph node development	22	2	1.26	5334	0.36153	0.89804
GO:0031125	rRNA 3'-end processing	22	2	1.26	287	0.36153	0.03881
GO:0015937	coenzyme A biosynthetic process	22	2	1.26	1270	0.36153	0.23548
GO:0042633	hair cycle	159	9	9.1	4411	0.36178	0.78525
GO:0070372	regulation of ERK1 and ERK2 cascade	439	26	25.14	2116	0.37211	0.40141
GO:0001580	detection of chemical stimulus involved in sensory perception of bitter taste	38	3	2.18	1509	0.37213	0.28281
GO:0006198	cAMP catabolic process	38	3	2.18	3282	0.37213	0.60441
GO:0090026	positive regulation of monocyte chemotaxis	38	3	2.18	5288	0.37213	0.89357
GO:2000114	regulation of establishment of cell polarity	38	3	2.18	3506	0.37213	0.63665
GO:0022411	cellular component disassembly	905	71	51.82	5197	0.37228	0.88381
GO:0001954	positive regulation of cell-matrix adhesion	76	4	4.35	4923	0.37259	0.85153
GO:0050770	regulation of axonogenesis	271	12	15.52	4968	0.37385	0.85662
GO:0032148	activation of protein kinase B activity	54	4	3.09	4820	0.37388	0.83816
GO:0010604	positive regulation of macromolecule metabolic process	4832	242	276.66	1160	0.37454	0.21
GO:0023052	signaling	9862	435	564.65	2822	0.37486	0.52949
GO:0031145	anaphase-promoting complex-dependent catabolic process	169	11	9.68	596	0.37512	0.1031
GO:0046134	pyrimidine nucleoside biosynthetic process	52	8	2.98	668	0.3752	0.1154
GO:0000154	rRNA modification	52	6	2.98	1033	0.3756	0.18247
GO:0002381	immunoglobulin production involved in immunoglobulin mediated immune response	85	7	4.87	1307	0.37577	0.24372
GO:0010669	epithelial structure maintenance	39	4	2.23	1948	0.37584	0.3741
GO:0071241	cellular response to inorganic substance	251	16	14.37	2946	0.37587	0.54722
GO:0032530	regulation of microvillus organization	19	2	1.09	3982	0.37601	0.71611
GO:0060046	regulation of acrosome reaction	20	2	1.15	4308	0.37602	0.76921
GO:0021889	olfactory bulb interneuron differentiation	22	2	1.26	1879	0.37605	0.35859
GO:0019674	NAD metabolic process	111	7	6.36	4421	0.37607	0.78704
GO:0031650	regulation of heat generation	29	2	1.66	316	0.37613	0.04501
GO:0048515	spermatid differentiation	223	13	12.77	3209	0.37615	0.59162
GO:0070200	establishment of protein localization to telomere	35	2	2	703	0.37619	0.12324
GO:0034109	homotypic cell-cell adhesion	140	8	8.02	4635	0.3762	0.81404
GO:0009812	flavonoid metabolic process	43	2	2.46	1186	0.37628	0.21639
GO:0010543	regulation of platelet activation	49	2	2.81	1130	0.37635	0.20491
GO:0048846	axon extension involved in axon guidance	68	3	3.89	4543	0.37637	0.80183
GO:0010712	regulation of collagen metabolic process	54	2	3.09	1829	0.37641	0.34758
GO:0009894	regulation of catabolic process	915	51	52.39	2729	0.37648	0.51476
GO:0030518	intracellular steroid hormone receptor signaling pathway	209	10	11.97	855	0.37658	0.1543
GO:0002702	positive regulation of production of molecular mediator of immune response	107	4	6.13	1370	0.37661	0.25514
GO:0022898	regulation of transmembrane transporter activity	315	15	18.04	3582	0.3768	0.65101
GO:0001704	formation of primary germ layer	206	8	11.79	3288	0.37695	0.60523
GO:0030203	glycosaminoglycan metabolic process	262	10	15	3986	0.37719	0.71658
GO:0006754	ATP biosynthetic process	83	14	4.75	1150	0.37976	0.20747
GO:0006767	water-soluble vitamin metabolic process	141	16	8.07	260	0.38017	0.03414
GO:0032269	negative regulation of cellular protein metabolic process	1745	78	99.91	4825	0.3808	0.83888
GO:0051345	positive regulation of hydrolase activity	1552	66	88.86	2829	0.38096	0.5304
GO:1905330	regulation of morphogenesis of an epithelium	318	22	18.21	3912	0.38146	0.70507
GO:0006972	hyperosmotic response	41	6	2.35	3701	0.38152	0.67026
GO:0060415	muscle tissue morphogenesis	123	10	7.04	2608	0.38173	0.49336
GO:0034123	positive regulation of toll-like receptor signaling pathway	36	4	2.06	2431	0.38205	0.46072
GO:0035088	establishment or maintenance of apical/basal cell polarity	64	5	3.66	1417	0.38224	0.26477
GO:0010830	regulation of myotube differentiation	86	6	4.92	2096	0.38232	0.39905
GO:0043536	positive regulation of blood vessel endothelial cell migration	40	3	2.29	4328	0.38244	0.77117
GO:0033145	positive regulation of intracellular steroid hormone receptor signaling pathway	23	2	1.32	308	0.38245	0.04373
GO:0019372	lipoxygenase pathway	23	2	1.32	271	0.38245	0.0367
GO:0021554	optic nerve development	23	2	1.32	758	0.38245	0.13559
GO:0001946	lymphangiogenesis	23	2	1.32	5072	0.38245	0.8681
GO:0051482	positive regulation of cytosolic calcium ion concentration involved in phospholipase C-activating G-...	23	2	1.32	2675	0.38245	0.50477
GO:0071732	cellular response to nitric oxide	23	2	1.32	5814	0.38245	0.94386
GO:0035589	G-protein coupled purinergic nucleotide receptor signaling pathway	23	2	1.32	5624	0.38245	0.92712
GO:0071850	mitotic cell cycle arrest	23	2	1.32	4728	0.38245	0.82514
GO:2000369	regulation of clathrin-dependent endocytosis	23	2	1.32	3099	0.38245	0.57213
GO:0046628	positive regulation of insulin receptor signaling pathway	23	2	1.32	4796	0.38245	0.83454
GO:0045721	negative regulation of gluconeogenesis	23	2	1.32	1587	0.38245	0.29989
GO:0006957	complement activation, alternative pathway	23	2	1.32	2526	0.38245	0.47885
GO:0030214	hyaluronan catabolic process	23	2	1.32	3557	0.38245	0.64691
GO:0010225	response to UV-C	23	2	1.32	427	0.38245	0.06599
GO:0000266	mitochondrial fission	60	4	3.44	4355	0.38248	0.77615
GO:0046685	response to arsenic-containing substance	43	3	2.46	1220	0.38249	0.22304
GO:0009416	response to light stimulus	517	30	29.6	3978	0.38254	0.71542
GO:0046839	phospholipid dephosphorylation	63	3	3.61	1177	0.38285	0.21417
GO:0031589	cell-substrate adhesion	590	33	33.78	4241	0.38291	0.75974
GO:0061418	regulation of transcription from RNA polymerase II promoter in response to hypoxia	71	5	4.07	3354	0.38421	0.61287
GO:0002407	dendritic cell chemotaxis	54	5	3.09	2670	0.38748	0.50407
GO:0035024	negative regulation of Rho protein signal transduction	39	3	2.23	4682	0.38794	0.82017
GO:0007143	female meiotic division	39	3	2.23	4579	0.38794	0.80558
GO:0071108	protein K48-linked deubiquitination	39	3	2.23	5408	0.38794	0.90659
GO:0002323	natural killer cell activation involved in immune response	39	3	2.23	972	0.38794	0.17287
GO:0071526	semaphorin-plexin signaling pathway	61	4	3.49	4445	0.38804	0.79076
GO:0051048	negative regulation of secretion	336	17	19.24	3841	0.38916	0.69378
GO:0060341	regulation of cellular localization	1404	59	80.39	3175	0.3897	0.58455
GO:0072657	protein localization to membrane	1167	133	66.82	683	0.39068	0.11961
GO:0000398	mRNA splicing, via spliceosome	539	30	30.86	1260	0.39264	0.23246
GO:0018149	peptide cross-linking	72	5	4.12	3438	0.39574	0.62677
GO:0007338	single fertilization	183	11	10.48	1661	0.39593	0.31661
GO:0045454	cell redox homeostasis	122	8	6.99	1507	0.39894	0.28251
GO:0050919	negative chemotaxis	68	5	3.89	3968	0.40008	0.714
GO:0046676	negative regulation of insulin secretion	56	4	3.21	3777	0.40023	0.68343
GO:0048872	homeostasis of number of cells	397	29	22.73	5185	0.40122	0.88249
GO:0006807	nitrogen compound metabolic process	11501	771	658.49	2007	0.40123	0.38372
GO:0051260	protein homooligomerization	443	32	25.36	2913	0.40191	0.5416
GO:0072384	organelle transport along microtubule	112	9	6.41	2710	0.40243	0.51126
GO:0050687	negative regulation of defense response to virus	34	4	1.95	1339	0.4026	0.24972
GO:0051085	chaperone mediated protein folding requiring cofactor	24	2	1.37	249	0.40306	0.03181
GO:0043471	regulation of cellular carbohydrate catabolic process	24	2	1.37	416	0.40306	0.06389
GO:0006450	regulation of translational fidelity	24	2	1.37	501	0.40306	0.08156
GO:0051895	negative regulation of focal adhesion assembly	24	2	1.37	1644	0.40306	0.31299
GO:0071872	cellular response to epinephrine stimulus	24	2	1.37	2044	0.40306	0.38985
GO:0048935	peripheral nervous system neuron development	24	2	1.37	4140	0.40306	0.74384
GO:0042759	long-chain fatty acid biosynthetic process	24	2	1.37	4647	0.40306	0.81483
GO:0033151	V(D)J recombination	44	3	2.52	4169	0.40311	0.74993
GO:0048754	branching morphogenesis of an epithelial tube	243	14	13.91	3893	0.40324	0.70164
GO:0003197	endocardial cushion development	69	4	3.95	4095	0.40325	0.73607
GO:0043149	stress fiber assembly	140	8	8.02	5791	0.40327	0.94113
GO:0015721	bile acid and bile salt transport	40	3	2.29	4850	0.40365	0.84191
GO:0030111	regulation of Wnt signaling pathway	524	26	30	1391	0.40458	0.25901
GO:0051865	protein autoubiquitination	106	7	6.07	4103	0.40508	0.73703
GO:0090002	establishment of protein localization to plasma membrane	243	16	13.91	4931	0.40654	0.85205
GO:0001934	positive regulation of protein phosphorylation	1518	84	86.91	4332	0.40773	0.77231
GO:0009168	purine ribonucleoside monophosphate biosynthetic process	140	20	8.02	1290	0.4094	0.24003
GO:0070848	response to growth factor	1121	44	64.18	1394	0.41002	0.25922
GO:0050954	sensory perception of mechanical stimulus	304	22	17.41	3384	0.41095	0.6178
GO:1901992	positive regulation of mitotic cell cycle phase transition	96	10	5.5	4280	0.41098	0.76529
GO:0014033	neural crest cell differentiation	133	10	7.61	1015	0.41142	0.1795
GO:0045624	positive regulation of T-helper cell differentiation	41	4	2.35	802	0.41157	0.14564
GO:0046365	monosaccharide catabolic process	113	8	6.47	3108	0.4116	0.57379
GO:0042423	catecholamine biosynthetic process	26	3	1.49	2836	0.4116	0.53112
GO:0009452	7-methylguanosine RNA capping	50	4	2.86	53	0.41168	0.00233
GO:0051084	'de novo' posttranslational protein folding	33	3	1.89	3312	0.41169	0.6079
GO:0060281	regulation of oocyte development	19	2	1.09	622	0.41173	0.10881
GO:0043217	myelin maintenance	19	2	1.09	2768	0.41173	0.52078
GO:0016048	detection of temperature stimulus	37	3	2.12	904	0.41174	0.16148
GO:0030157	pancreatic juice secretion	20	2	1.15	457	0.41174	0.07203
GO:0016126	sterol biosynthetic process	92	6	5.27	811	0.41177	0.14647
GO:0043243	positive regulation of protein complex disassembly	40	3	2.29	5217	0.41177	0.88577
GO:1901020	negative regulation of calcium ion transmembrane transporter activity	40	3	2.29	4831	0.41177	0.83944
GO:0060831	smoothened signaling pathway involved in dorsal/ventral neural tube patterning	23	2	1.32	4491	0.41178	0.79601
GO:0033144	negative regulation of intracellular steroid hormone receptor signaling pathway	45	3	2.58	335	0.41183	0.04875
GO:0090344	negative regulation of cell aging	29	2	1.66	4899	0.41185	0.84828
GO:1903036	positive regulation of response to wounding	92	5	5.27	3238	0.41198	0.59761
GO:0045637	regulation of myeloid cell differentiation	308	16	17.63	4718	0.41227	0.82406
GO:0055025	positive regulation of cardiac muscle tissue development	66	2	3.78	4700	0.41229	0.82285
GO:1903146	regulation of mitophagy	81	6	4.64	322	0.41303	0.04574
GO:0002237	response to molecule of bacterial origin	520	18	29.77	1025	0.41442	0.18127
GO:0006139	nucleobase-containing compound metabolic process	9739	645	557.61	3142	0.41524	0.57894
GO:0008156	negative regulation of DNA replication	83	9	4.75	6218	0.41774	0.9741
GO:0042398	cellular modified amino acid biosynthetic process	67	5	3.84	1126	0.41903	0.20325
GO:0014912	negative regulation of smooth muscle cell migration	41	3	2.35	1689	0.41924	0.32215
GO:0006370	7-methylguanosine mRNA capping	41	3	2.35	1197	0.41924	0.21877
GO:0090383	phagosome acidification	41	3	2.35	3044	0.41924	0.56419
GO:0032392	DNA geometric change	167	22	9.56	1135	0.41941	0.20538
GO:0030855	epithelial cell differentiation	937	42	53.65	938	0.42141	0.16681
GO:0070936	protein K48-linked ubiquitination	91	6	5.21	3426	0.42197	0.62449
GO:0071470	cellular response to osmotic stress	44	6	2.52	2117	0.42239	0.40167
GO:0031929	TOR signaling	142	9	8.13	4338	0.42325	0.77297
GO:0098911	regulation of ventricular cardiac muscle cell action potential	25	2	1.43	2627	0.42335	0.49635
GO:0050667	homocysteine metabolic process	25	2	1.43	443	0.42335	0.07017
GO:0032486	Rap protein signal transduction	25	2	1.43	5534	0.42335	0.91791
GO:0033622	integrin activation	25	2	1.43	810	0.42335	0.14645
GO:0035435	phosphate ion transmembrane transport	25	2	1.43	1695	0.42335	0.32344
GO:0003198	epithelial to mesenchymal transition involved in endocardial cushion formation	25	2	1.43	1907	0.42335	0.36529
GO:0046130	purine ribonucleoside catabolic process	25	2	1.43	1287	0.42335	0.2394
GO:0009650	UV protection	25	2	1.43	353	0.42335	0.05066
GO:2000738	positive regulation of stem cell differentiation	25	2	1.43	313	0.42335	0.04474
GO:0042523	positive regulation of tyrosine phosphorylation of Stat5 protein	25	2	1.43	5879	0.42335	0.94848
GO:0010288	response to lead ion	25	2	1.43	825	0.42335	0.14984
GO:0045579	positive regulation of B cell differentiation	25	2	1.43	5970	0.42335	0.95501
GO:0043388	positive regulation of DNA binding	79	7	4.52	1898	0.42549	0.36302
GO:0007062	sister chromatid cohesion	227	15	13	227	0.42582	0.02683
GO:0006695	cholesterol biosynthetic process	83	5	4.75	5959	0.42659	0.9546
GO:0006612	protein targeting to membrane	649	110	37.16	412	0.4272	0.06315
GO:0097190	apoptotic signaling pathway	1024	61	58.63	4962	0.42919	0.85583
GO:0009411	response to UV	232	13	13.28	5413	0.4307	0.90687
GO:0006469	negative regulation of protein kinase activity	412	17	23.59	4675	0.43071	0.81897
GO:0000724	double-strand break repair via homologous recombination	156	12	8.93	4315	0.43194	0.76979
GO:0048146	positive regulation of fibroblast proliferation	92	6	5.27	4184	0.43228	0.75217
GO:0042255	ribosome assembly	171	31	9.79	4359	0.43625	0.77647
GO:0009117	nucleotide metabolic process	1073	88	61.44	2553	0.43953	0.48405
GO:0019985	translesion synthesis	79	11	4.52	3819	0.44125	0.69057
GO:1901137	carbohydrate derivative biosynthetic process	1253	86	71.74	5019	0.44233	0.86352
GO:0042730	fibrinolysis	45	5	2.58	4141	0.44262	0.74386
GO:0014068	positive regulation of phosphatidylinositol 3-kinase signaling	127	8	7.27	5252	0.4429	0.88973
GO:0006405	RNA export from nucleus	220	14	12.6	697	0.44296	0.12221
GO:0070528	protein kinase C signaling	55	4	3.15	654	0.44315	0.11349
GO:0008209	androgen metabolic process	38	3	2.18	151	0.44316	0.0145
GO:0006089	lactate metabolic process	26	2	1.49	2098	0.44327	0.39932
GO:0035278	miRNA mediated inhibition of translation	26	2	1.49	4017	0.44327	0.72283
GO:0002076	osteoblast development	26	2	1.49	1153	0.44327	0.20837
GO:0031274	positive regulation of pseudopodium assembly	26	2	1.49	5031	0.44327	0.86443
GO:1903206	negative regulation of hydrogen peroxide-induced cell death	26	2	1.49	1383	0.44327	0.25734
GO:0019934	cGMP-mediated signaling	26	2	1.49	3306	0.44327	0.60727
GO:0061029	eyelid development in camera-type eye	26	2	1.49	616	0.44327	0.10768
GO:0006750	glutathione biosynthetic process	26	2	1.49	2732	0.44327	0.51533
GO:0042136	neurotransmitter biosynthetic process	26	2	1.49	5379	0.44327	0.90398
GO:0033033	negative regulation of myeloid cell apoptotic process	26	2	1.49	4997	0.44327	0.86015
GO:0034116	positive regulation of heterotypic cell-cell adhesion	26	2	1.49	5675	0.44327	0.93145
GO:0006999	nuclear pore organization	26	2	1.49	49	0.44327	0.00183
GO:0032012	regulation of ARF protein signal transduction	26	2	1.49	5721	0.44327	0.935
GO:0010458	exit from mitosis	51	3	2.92	4364	0.44341	0.77749
GO:0000075	cell cycle checkpoint	417	33	23.88	320	0.44357	0.04556
GO:0048009	insulin-like growth factor receptor signaling pathway	60	3	3.44	3362	0.44358	0.61387
GO:0018198	peptidyl-cysteine modification	64	3	3.66	105	0.44366	0.00969
GO:0002028	regulation of sodium ion transport	141	7	8.07	5670	0.4438	0.93063
GO:0002683	negative regulation of immune system process	620	34	35.5	1773	0.44396	0.33896
GO:0009584	detection of visible light	87	10	4.98	311	0.4445	0.04455
GO:0050678	regulation of epithelial cell proliferation	491	25	28.11	519	0.44451	0.08547
GO:0010676	positive regulation of cellular carbohydrate metabolic process	91	8	5.21	615	0.44499	0.10722
GO:0044743	intracellular protein transmembrane import	75	7	4.29	314	0.44501	0.04489
GO:1902751	positive regulation of cell cycle G2/M phase transition	42	4	2.4	844	0.44525	0.15229
GO:0008211	glucocorticoid metabolic process	35	3	2	5051	0.44538	0.86583
GO:0021559	trigeminal nerve development	20	2	1.15	3708	0.44541	0.67107
GO:0050951	sensory perception of temperature stimulus	38	3	2.18	2543	0.44542	0.48205
GO:0010828	positive regulation of glucose transport	91	6	5.21	5048	0.44543	0.8656
GO:1903312	negative regulation of mRNA metabolic process	75	5	4.29	3837	0.44545	0.69343
GO:0042490	mechanoreceptor differentiation	110	7	6.3	1117	0.44545	0.20118
GO:0010870	positive regulation of receptor biosynthetic process	24	2	1.37	3419	0.44546	0.62307
GO:0086009	membrane repolarization	62	4	3.55	1544	0.4455	0.28747
GO:2000662	regulation of interleukin-5 secretion	10	1	0.57	1107	0.44551	0.19799
GO:1990592	protein K69-linked ufmylation	10	1	0.57	3941	0.44551	0.70993
GO:0021764	amygdala development	10	1	0.57	5460	0.44551	0.91062
GO:0070544	histone H3-K36 demethylation	10	1	0.57	2870	0.44551	0.5365
GO:1901838	positive regulation of transcription of nuclear large rRNA transcript from RNA polymerase I promoter	10	1	0.57	1219	0.44551	0.22265
GO:0045629	negative regulation of T-helper 2 cell differentiation	10	1	0.57	4842	0.44551	0.84084
GO:0021869	forebrain ventricular zone progenitor cell division	10	1	0.57	3806	0.44551	0.68882
GO:0048496	maintenance of animal organ identity	10	1	0.57	3194	0.44551	0.5889
GO:0016199	axon midline choice point recognition	10	1	0.57	717	0.44551	0.12592
GO:1901524	regulation of macromitophagy	10	1	0.57	3025	0.44551	0.56043
GO:0060054	positive regulation of epithelial cell proliferation involved in wound healing	10	1	0.57	1345	0.44551	0.25064
GO:0001554	luteolysis	10	1	0.57	3241	0.44551	0.59821
GO:0060087	relaxation of vascular smooth muscle	10	1	0.57	3513	0.44551	0.63801
GO:1900028	negative regulation of ruffle assembly	10	1	0.57	2869	0.44551	0.53619
GO:0051096	positive regulation of helicase activity	10	1	0.57	3381	0.44551	0.6174
GO:0048194	Golgi vesicle budding	10	1	0.57	2173	0.44551	0.41334
GO:0001661	conditioned taste aversion	10	1	0.57	5261	0.44551	0.89071
GO:0048102	autophagic cell death	10	1	0.57	3324	0.44551	0.6101
GO:0031086	nuclear-transcribed mRNA catabolic process, deadenylation-independent decay	10	1	0.57	2779	0.44551	0.52274
GO:0021637	trigeminal nerve structural organization	10	1	0.57	3179	0.44551	0.58521
GO:0048227	plasma membrane to endosome transport	10	1	0.57	1889	0.44551	0.36013
GO:0072236	metanephric loop of Henle development	10	1	0.57	737	0.44551	0.12907
GO:0060372	regulation of atrial cardiac muscle cell membrane repolarization	10	1	0.57	875	0.44551	0.15788
GO:0072711	cellular response to hydroxyurea	10	1	0.57	4890	0.44551	0.84704
GO:0032287	peripheral nervous system myelin maintenance	10	1	0.57	3204	0.44551	0.59029
GO:0060405	regulation of penile erection	10	1	0.57	3569	0.44551	0.64911
GO:2001181	positive regulation of interleukin-10 secretion	10	1	0.57	2378	0.44551	0.45142
GO:0021979	hypothalamus cell differentiation	10	1	0.57	246	0.44551	0.03092
GO:1900193	regulation of oocyte maturation	10	1	0.57	1956	0.44551	0.3753
GO:0003357	noradrenergic neuron differentiation	10	1	0.57	1420	0.44551	0.26527
GO:0019563	glycerol catabolic process	10	1	0.57	5801	0.44551	0.94224
GO:0007258	JUN phosphorylation	10	1	0.57	4229	0.44551	0.7584
GO:0060287	epithelial cilium movement involved in determination of left/right asymmetry	10	1	0.57	1741	0.44551	0.33249
GO:0019640	glucuronate catabolic process to xylulose 5-phosphate	10	1	0.57	107	0.44551	0.0098
GO:0060735	regulation of eIF2 alpha phosphorylation by dsRNA	10	1	0.57	845	0.44551	0.15231
GO:0015867	ATP transport	10	1	0.57	2334	0.44551	0.44078
GO:1903147	negative regulation of mitophagy	10	1	0.57	2240	0.44551	0.42547
GO:0043152	induction of bacterial agglutination	10	1	0.57	1170	0.44551	0.21241
GO:0015809	arginine transport	10	1	0.57	5229	0.44551	0.88726
GO:0060839	endothelial cell fate commitment	10	1	0.57	1149	0.44551	0.20729
GO:1902369	negative regulation of RNA catabolic process	10	1	0.57	1728	0.44551	0.33014
GO:0032960	regulation of inositol trisphosphate biosynthetic process	10	1	0.57	2579	0.44551	0.48908
GO:0051694	pointed-end actin filament capping	10	1	0.57	3538	0.44551	0.64273
GO:0097039	protein linear polyubiquitination	10	1	0.57	5310	0.44551	0.89563
GO:0030091	protein repair	10	1	0.57	3188	0.44551	0.58762
GO:0009120	deoxyribonucleoside metabolic process	10	1	0.57	2464	0.44551	0.46771
GO:0042426	choline catabolic process	10	1	0.57	2384	0.44551	0.45202
GO:0034384	high-density lipoprotein particle clearance	10	1	0.57	2255	0.44551	0.42752
GO:0031642	negative regulation of myelination	10	1	0.57	1893	0.44551	0.36129
GO:0034331	cell junction maintenance	10	1	0.57	1890	0.44551	0.36042
GO:1903689	regulation of wound healing, spreading of epidermal cells	10	1	0.57	3494	0.44551	0.63504
GO:0060992	response to fungicide	10	1	0.57	3353	0.44551	0.61264
GO:0009249	protein lipoylation	10	1	0.57	743	0.44551	0.13268
GO:0034475	U4 snRNA 3'-end processing	10	1	0.57	349	0.44551	0.05003
GO:2000427	positive regulation of apoptotic cell clearance	10	1	0.57	5047	0.44551	0.86558
GO:0009756	carbohydrate mediated signaling	10	1	0.57	125	0.44551	0.01184
GO:0006572	tyrosine catabolic process	10	1	0.57	2558	0.44551	0.48531
GO:0045113	regulation of integrin biosynthetic process	10	1	0.57	4386	0.44551	0.78169
GO:0002885	positive regulation of hypersensitivity	10	1	0.57	4928	0.44551	0.85173
GO:0097107	postsynaptic density assembly	10	1	0.57	4360	0.44551	0.77686
GO:0033326	cerebrospinal fluid secretion	10	1	0.57	2097	0.44551	0.39909
GO:0090267	positive regulation of mitotic cell cycle spindle assembly checkpoint	10	1	0.57	4021	0.44551	0.72361
GO:1901203	positive regulation of extracellular matrix assembly	10	1	0.57	5432	0.44551	0.90869
GO:0033152	immunoglobulin V(D)J recombination	10	1	0.57	3795	0.44551	0.68631
GO:0070813	hydrogen sulfide metabolic process	10	1	0.57	1821	0.44551	0.34572
GO:0001768	establishment of T cell polarity	10	1	0.57	5116	0.44551	0.874
GO:0070831	basement membrane assembly	10	1	0.57	4419	0.44551	0.78683
GO:0010760	negative regulation of macrophage chemotaxis	10	1	0.57	4104	0.44551	0.73746
GO:0006085	acetyl-CoA biosynthetic process	30	2	1.72	1767	0.44554	0.33731
GO:0045606	positive regulation of epidermal cell differentiation	35	2	2	4335	0.4456	0.77284
GO:0060074	synapse maturation	37	2	2.12	606	0.44563	0.10465
GO:0097300	programmed necrotic cell death	56	3	3.21	5126	0.44565	0.87484
GO:0050702	interleukin-1 beta secretion	57	3	3.26	3818	0.44566	0.69022
GO:0061462	protein localization to lysosome	42	2	2.4	2164	0.44569	0.41235
GO:1905039	carboxylic acid transmembrane transport	100	5	5.73	3534	0.44576	0.64238
GO:0090279	regulation of calcium ion import	171	9	9.79	979	0.44578	0.17308
GO:0043268	positive regulation of potassium ion transport	52	2	2.98	4599	0.44581	0.80851
GO:1901799	negative regulation of proteasomal protein catabolic process	52	2	2.98	5233	0.44581	0.88807
GO:0043550	regulation of lipid kinase activity	88	4	5.04	1655	0.44583	0.31533
GO:0006885	regulation of pH	160	8	9.16	3415	0.44586	0.6226
GO:0002495	antigen processing and presentation of peptide antigen via MHC class II	164	8	9.39	3057	0.44591	0.56565
GO:1902305	regulation of sodium ion transmembrane transport	95	4	5.44	1152	0.44592	0.20811
GO:0051250	negative regulation of lymphocyte activation	211	8	12.08	789	0.4465	0.143
GO:0046883	regulation of hormone secretion	405	19	23.19	5089	0.44653	0.87007
GO:0000302	response to reactive oxygen species	361	27	20.67	826	0.44748	0.14988
GO:0018105	peptidyl-serine phosphorylation	455	25	26.05	6248	0.44792	0.97588
GO:0043687	post-translational protein modification	65	9	3.72	662	0.44796	0.11495
GO:0010941	regulation of cell death	2649	139	151.67	4253	0.44868	0.76114
GO:0045664	regulation of neuron differentiation	927	36	53.08	1878	0.44937	0.35806
GO:0010613	positive regulation of cardiac muscle hypertrophy	43	3	2.46	2757	0.44999	0.51906
GO:0002286	T cell activation involved in immune response	167	10	9.56	783	0.45003	0.14138
GO:0006887	exocytosis	652	26	37.33	4236	0.45015	0.75903
GO:0009607	response to biotic stimulus	1365	58	78.15	2863	0.45023	0.53564
GO:0048278	vesicle docking	101	5	5.78	2537	0.45055	0.48088
GO:0048041	focal adhesion assembly	127	6	7.27	6019	0.45076	0.95947
GO:0043902	positive regulation of multi-organism process	253	16	14.49	2597	0.45174	0.49218
GO:0031328	positive regulation of cellular biosynthetic process	2918	146	167.07	990	0.45516	0.17433
GO:0050896	response to stimulus	13122	652	751.31	5243	0.45773	0.88898
GO:0002250	adaptive immune response	616	31	35.27	5646	0.45861	0.92872
GO:0008643	carbohydrate transport	329	31	18.84	3773	0.45873	0.68313
GO:0042542	response to hydrogen peroxide	226	18	12.94	5858	0.46014	0.94719
GO:0006809	nitric oxide biosynthetic process	120	9	6.87	3318	0.46222	0.60892
GO:0042462	eye photoreceptor cell development	46	4	2.63	1166	0.46248	0.21076
GO:0055003	cardiac myofibril assembly	27	2	1.55	936	0.4628	0.16625
GO:0043497	regulation of protein heterodimerization activity	27	2	1.55	4756	0.4628	0.82846
GO:0042053	regulation of dopamine metabolic process	27	2	1.55	998	0.4628	0.17617
GO:0071539	protein localization to centrosome	27	2	1.55	3866	0.4628	0.69748
GO:0006265	DNA topological change	27	2	1.55	4127	0.4628	0.74107
GO:1903830	magnesium ion transmembrane transport	27	2	1.55	793	0.4628	0.14386
GO:0051988	regulation of attachment of spindle microtubules to kinetochore	27	2	1.55	3751	0.4628	0.67891
GO:0090141	positive regulation of mitochondrial fission	27	2	1.55	5242	0.4628	0.88889
GO:0045899	positive regulation of RNA polymerase II transcriptional preinitiation complex assembly	27	2	1.55	1036	0.4628	0.18361
GO:0045739	positive regulation of DNA repair	91	7	5.21	549	0.46342	0.09205
GO:0007276	gamete generation	985	54	56.4	2686	0.46381	0.50662
GO:0061136	regulation of proteasomal protein catabolic process	283	13	16.2	1039	0.46406	0.18368
GO:0046686	response to cadmium ion	64	5	3.66	1571	0.46474	0.29647
GO:0002931	response to ischemia	61	4	3.49	219	0.465	0.02496
GO:0070536	protein K63-linked deubiquitination	44	3	2.52	5305	0.46511	0.89525
GO:0039694	viral RNA genome replication	44	3	2.52	1549	0.46511	0.28873
GO:0006974	cellular response to DNA damage stimulus	1376	97	78.78	5590	0.46884	0.92387
GO:0001933	negative regulation of protein phosphorylation	682	30	39.05	4402	0.46915	0.78403
GO:0009116	nucleoside metabolic process	677	71	38.76	103	0.46981	0.00958
GO:0006979	response to oxidative stress	676	45	38.7	342	0.47076	0.04923
GO:0035567	non-canonical Wnt signaling pathway	271	20	15.52	1888	0.47632	0.36001
GO:0010498	proteasomal protein catabolic process	775	46	44.37	2412	0.47697	0.45591
GO:0001780	neutrophil homeostasis	24	3	1.37	4385	0.47698	0.78141
GO:0021872	forebrain generation of neurons	98	7	5.61	2566	0.47703	0.48637
GO:0071711	basement membrane organization	21	2	1.2	1565	0.47717	0.29417
GO:0060603	mammary gland duct morphogenesis	56	4	3.21	2522	0.47717	0.47832
GO:0043931	ossification involved in bone maturation	22	2	1.26	488	0.47718	0.07796
GO:0014874	response to stimulus involved in regulation of muscle adaptation	23	2	1.32	5169	0.4772	0.88064
GO:0015813	L-glutamate transport	24	2	1.37	1377	0.47721	0.25633
GO:0099054	presynapse assembly	24	2	1.37	3721	0.47721	0.67421
GO:0061037	negative regulation of cartilage development	45	3	2.58	5494	0.47725	0.9141
GO:0008300	isoprenoid catabolic process	11	1	0.63	4094	0.47727	0.73598
GO:0045627	positive regulation of T-helper 1 cell differentiation	11	1	0.63	2061	0.47727	0.39385
GO:1902931	negative regulation of alcohol biosynthetic process	11	1	0.63	2198	0.47727	0.41866
GO:0045607	regulation of auditory receptor cell differentiation	11	1	0.63	5097	0.47727	0.87095
GO:0042996	regulation of Golgi to plasma membrane protein transport	11	1	0.63	2906	0.47727	0.54053
GO:0060050	positive regulation of protein glycosylation	11	1	0.63	6109	0.47727	0.96713
GO:0060029	convergent extension involved in organogenesis	11	1	0.63	645	0.47727	0.11146
GO:1904354	negative regulation of telomere capping	11	1	0.63	5761	0.47727	0.93761
GO:0021644	vagus nerve morphogenesis	11	1	0.63	2617	0.47727	0.49485
GO:0003056	regulation of vascular smooth muscle contraction	11	1	0.63	4592	0.47727	0.80731
GO:0060316	positive regulation of ryanodine-sensitive calcium-release channel activity	11	1	0.63	4087	0.47727	0.73506
GO:0043031	negative regulation of macrophage activation	11	1	0.63	2814	0.47727	0.52737
GO:0086046	membrane depolarization during SA node cell action potential	11	1	0.63	410	0.47727	0.06264
GO:0048820	hair follicle maturation	11	1	0.63	2059	0.47727	0.39345
GO:2001169	regulation of ATP biosynthetic process	11	1	0.63	5251	0.47727	0.88971
GO:2001185	regulation of CD8-positive, alpha-beta T cell activation	11	1	0.63	4433	0.47727	0.78896
GO:0021960	anterior commissure morphogenesis	11	1	0.63	4851	0.47727	0.84195
GO:0072592	oxygen metabolic process	11	1	0.63	3111	0.47727	0.57394
GO:0007161	calcium-independent cell-matrix adhesion	11	1	0.63	1371	0.47727	0.25562
GO:0046015	regulation of transcription by glucose	11	1	0.63	5773	0.47727	0.93901
GO:0044791	positive regulation by host of viral release from host cell	11	1	0.63	3737	0.47727	0.67726
GO:1900122	positive regulation of receptor binding	11	1	0.63	3163	0.47727	0.58275
GO:0071169	establishment of protein localization to chromatin	11	1	0.63	1065	0.47727	0.18834
GO:0032819	positive regulation of natural killer cell proliferation	11	1	0.63	5759	0.47727	0.93744
GO:0032847	regulation of cellular pH reduction	11	1	0.63	3328	0.47727	0.61039
GO:2001225	regulation of chloride transport	11	1	0.63	3329	0.47727	0.61039
GO:0052697	xenobiotic glucuronidation	11	1	0.63	400	0.47727	0.0606
GO:0048619	embryonic hindgut morphogenesis	11	1	0.63	3451	0.47727	0.62916
GO:0032532	regulation of microvillus length	11	1	0.63	5059	0.47727	0.86651
GO:0044848	biological phase	11	1	0.63	4165	0.47727	0.7487
GO:0043144	snoRNA processing	11	1	0.63	582	0.47727	0.10024
GO:0003284	septum primum development	11	1	0.63	601	0.47727	0.10382
GO:0046499	S-adenosylmethioninamine metabolic process	11	1	0.63	1812	0.47727	0.34407
GO:0006189	'de novo' IMP biosynthetic process	11	1	0.63	2827	0.47727	0.53009
GO:0035630	bone mineralization involved in bone maturation	11	1	0.63	595	0.47727	0.10264
GO:0002326	B cell lineage commitment	11	1	0.63	5614	0.47727	0.92624
GO:0046294	formaldehyde catabolic process	11	1	0.63	35	0.47727	0.00067
GO:0009414	response to water deprivation	11	1	0.63	1300	0.47727	0.24193
GO:0090085	regulation of protein deubiquitination	11	1	0.63	2052	0.47727	0.392
GO:0032909	regulation of transforming growth factor beta2 production	11	1	0.63	3516	0.47727	0.63871
GO:0090043	regulation of tubulin deacetylation	11	1	0.63	693	0.47727	0.12148
GO:0031666	positive regulation of lipopolysaccharide-mediated signaling pathway	11	1	0.63	2252	0.47727	0.42683
GO:0034380	high-density lipoprotein particle assembly	11	1	0.63	1045	0.47727	0.18485
GO:0035965	cardiolipin acyl-chain remodeling	11	1	0.63	1815	0.47727	0.34449
GO:0002118	aggressive behavior	11	1	0.63	1030	0.47727	0.18221
GO:2000343	positive regulation of chemokine (C-X-C motif) ligand 2 production	11	1	0.63	3817	0.47727	0.69014
GO:0009211	pyrimidine deoxyribonucleoside triphosphate metabolic process	11	1	0.63	806	0.47727	0.1459
GO:0045348	positive regulation of MHC class II biosynthetic process	11	1	0.63	5664	0.47727	0.9303
GO:0015919	peroxisomal membrane transport	11	1	0.63	949	0.47727	0.16834
GO:0060965	negative regulation of gene silencing by miRNA	11	1	0.63	1127	0.47727	0.20343
GO:0034427	nuclear-transcribed mRNA catabolic process, exonucleolytic, 3'-5'	11	1	0.63	581	0.47727	0.10024
GO:0098734	macromolecule depalmitoylation	11	1	0.63	1779	0.47727	0.33951
GO:0002236	detection of misfolded protein	11	1	0.63	339	0.47727	0.04901
GO:0060907	positive regulation of macrophage cytokine production	11	1	0.63	5013	0.47727	0.86293
GO:0061316	canonical Wnt signaling pathway involved in heart development	11	1	0.63	4552	0.47727	0.80306
GO:0030388	fructose 1,6-bisphosphate metabolic process	11	1	0.63	203	0.47727	0.02239
GO:1990403	embryonic brain development	11	1	0.63	3477	0.47727	0.63316
GO:0016094	polyprenol biosynthetic process	11	1	0.63	393	0.47727	0.05864
GO:0002842	positive regulation of T cell mediated immune response to tumor cell	11	1	0.63	340	0.47727	0.04901
GO:0070131	positive regulation of mitochondrial translation	11	1	0.63	54	0.47727	0.0024
GO:0097104	postsynaptic membrane assembly	11	1	0.63	4844	0.47727	0.84134
GO:0090186	regulation of pancreatic juice secretion	11	1	0.63	1857	0.47727	0.35322
GO:1902548	negative regulation of cellular response to vascular endothelial growth factor stimulus	11	1	0.63	892	0.47727	0.15981
GO:0090116	C-5 methylation of cytosine	11	1	0.63	3215	0.47727	0.59307
GO:0009635	response to herbicide	11	1	0.63	1228	0.47727	0.2257
GO:0014824	artery smooth muscle contraction	11	1	0.63	1688	0.47727	0.32209
GO:0050765	negative regulation of phagocytosis	11	1	0.63	4494	0.47727	0.79616
GO:0014834	skeletal muscle satellite cell maintenance involved in skeletal muscle regeneration	11	1	0.63	4334	0.47727	0.77265
GO:0022615	protein to membrane docking	11	1	0.63	2316	0.47727	0.43819
GO:0010756	positive regulation of plasminogen activation	11	1	0.63	2296	0.47727	0.4356
GO:0035493	SNARE complex assembly	29	2	1.66	3956	0.47727	0.7126
GO:0090036	regulation of protein kinase C signaling	29	2	1.66	2041	0.47727	0.3889
GO:0006517	protein deglycosylation	31	2	1.77	1156	0.4773	0.20906
GO:1905209	positive regulation of cardiocyte differentiation	35	2	2	1576	0.47735	0.29797
GO:0032770	positive regulation of monooxygenase activity	46	2	2.63	4160	0.47749	0.7472
GO:0008064	regulation of actin polymerization or depolymerization	275	15	15.75	4163	0.47752	0.74795
GO:0051932	synaptic transmission, GABAergic	68	3	3.89	3988	0.47755	0.71683
GO:0040018	positive regulation of multicellular organism growth	62	4	3.55	4970	0.47767	0.85689
GO:0045833	negative regulation of lipid metabolic process	111	4	6.36	584	0.47789	0.10036
GO:0051303	establishment of chromosome localization	108	3	6.18	3184	0.47808	0.58628
GO:2000021	regulation of ion homeostasis	342	16	19.58	4802	0.47817	0.83492
GO:0007585	respiratory gaseous exchange	113	5	6.47	3551	0.47865	0.64507
GO:0043900	regulation of multi-organism process	618	29	35.38	2239	0.47883	0.4254
GO:0048514	blood vessel morphogenesis	857	40	49.07	1520	0.47947	0.28396
GO:0006111	regulation of gluconeogenesis	68	5	3.89	2209	0.47975	0.42169
GO:0040014	regulation of multicellular organism growth	121	8	6.93	1011	0.47977	0.17826
GO:0007178	transmembrane receptor protein serine/threonine kinase signaling pathway	529	19	30.29	3518	0.47996	0.63947
GO:2001243	negative regulation of intrinsic apoptotic signaling pathway	165	10	9.45	2593	0.47999	0.49104
GO:0060444	branching involved in mammary gland duct morphogenesis	45	3	2.58	1586	0.48005	0.29983
GO:0043252	sodium-independent organic anion transport	45	3	2.58	951	0.48005	0.1689
GO:0007628	adult walking behavior	45	3	2.58	275	0.48005	0.03733
GO:0030449	regulation of complement activation	45	3	2.58	1350	0.48005	0.25091
GO:0071300	cellular response to retinoic acid	114	7	6.53	2695	0.48034	0.50785
GO:0016233	telomere capping	85	4	4.87	3989	0.48061	0.71749
GO:0090263	positive regulation of canonical Wnt signaling pathway	218	13	12.48	1022	0.48075	0.18098
GO:2000060	positive regulation of protein ubiquitination involved in ubiquitin-dependent protein catabolic proc...	194	13	11.11	4003	0.48139	0.72038
GO:0006739	NADP metabolic process	65	5	3.72	900	0.48161	0.16078
GO:0061001	regulation of dendritic spine morphogenesis	57	4	3.26	5845	0.4818	0.94624
GO:0010667	negative regulation of cardiac muscle cell apoptotic process	28	2	1.6	4885	0.48192	0.84613
GO:0050965	detection of temperature stimulus involved in sensory perception of pain	28	2	1.6	328	0.48192	0.04672
GO:1900745	positive regulation of p38MAPK cascade	28	2	1.6	2256	0.48192	0.42775
GO:0003215	cardiac right ventricle morphogenesis	28	2	1.6	3098	0.48192	0.57202
GO:0070166	enamel mineralization	28	2	1.6	914	0.48192	0.16333
GO:1901741	positive regulation of myoblast fusion	28	2	1.6	4867	0.48192	0.84385
GO:0045589	regulation of regulatory T cell differentiation	28	2	1.6	3744	0.48192	0.67834
GO:0050918	positive chemotaxis	97	6	5.55	523	0.48321	0.08602
GO:0055085	transmembrane transport	2163	130	123.84	3729	0.48328	0.6764
GO:0007416	synapse assembly	231	11	13.23	6006	0.48799	0.95851
GO:0007052	mitotic spindle organization	81	6	4.64	1194	0.48973	0.21814
GO:0045668	negative regulation of osteoblast differentiation	63	4	3.61	113	0.49023	0.01049
GO:0045494	photoreceptor cell maintenance	63	4	3.61	2218	0.49023	0.42321
GO:0045742	positive regulation of epidermal growth factor receptor signaling pathway	63	4	3.61	4800	0.49023	0.83479
GO:0030901	midbrain development	149	14	8.53	1943	0.49253	0.37247
GO:0001702	gastrulation with mouth forming second	46	3	2.63	784	0.49479	0.14157
GO:0090314	positive regulation of protein targeting to membrane	46	3	2.63	1528	0.49479	0.28572
GO:0045745	positive regulation of G-protein coupled receptor protein signaling pathway	46	3	2.63	3268	0.49479	0.60226
GO:0021915	neural tube development	265	15	15.17	4886	0.49503	0.84664
GO:0001942	hair follicle development	126	7	7.21	1341	0.49505	0.25008
GO:0046326	positive regulation of glucose import	81	5	4.64	687	0.49749	0.12065
GO:0031623	receptor internalization	138	8	7.9	4969	0.49765	0.85683
GO:0051259	protein oligomerization	744	51	42.6	1660	0.4979	0.31629
GO:0002042	cell migration involved in sprouting angiogenesis	69	6	3.95	1249	0.50001	0.23003
GO:0043537	negative regulation of blood vessel endothelial cell migration	50	4	2.86	1456	0.50033	0.27333
GO:0030307	positive regulation of cell growth	273	15	15.63	4247	0.50043	0.76053
GO:0033141	positive regulation of peptidyl-serine phosphorylation of STAT protein	29	2	1.66	776	0.50061	0.13975
GO:0048339	paraxial mesoderm development	29	2	1.66	1892	0.50061	0.3607
GO:0010592	positive regulation of lamellipodium assembly	29	2	1.66	3850	0.50061	0.69481
GO:0043046	DNA methylation involved in gamete generation	29	2	1.66	4258	0.50061	0.76235
GO:0050908	detection of light stimulus involved in visual perception	29	2	1.66	3711	0.50061	0.67279
GO:0051103	DNA ligation involved in DNA repair	29	2	1.66	1035	0.50061	0.18279
GO:0035729	cellular response to hepatocyte growth factor stimulus	29	2	1.66	6025	0.50061	0.96002
GO:0061003	positive regulation of dendritic spine morphogenesis	29	2	1.66	1988	0.50061	0.38144
GO:0070816	phosphorylation of RNA polymerase II C-terminal domain	29	2	1.66	2408	0.50061	0.45527
GO:0016925	protein sumoylation	257	15	14.71	2512	0.50085	0.47666
GO:0061053	somite development	136	7	7.79	1245	0.50101	0.22905
GO:0048814	regulation of dendrite morphogenesis	124	6	7.1	3857	0.50112	0.69569
GO:0051928	positive regulation of calcium ion transport	165	6	9.45	2679	0.50195	0.50534
GO:0050673	epithelial cell proliferation	577	29	33.04	3923	0.50218	0.70626
GO:0060021	palate development	148	10	8.47	3024	0.50263	0.56023
GO:0032024	positive regulation of insulin secretion	106	6	6.07	1185	0.50286	0.21595
GO:0006399	tRNA metabolic process	255	31	14.6	847	0.50341	0.15275
GO:0008610	lipid biosynthetic process	984	69	56.34	1464	0.50421	0.27561
GO:0033044	regulation of chromosome organization	276	21	15.8	3575	0.50606	0.65017
GO:0006353	DNA-templated transcription, termination	176	15	10.08	1474	0.50613	0.27727
GO:0022617	extracellular matrix disassembly	142	11	8.13	4781	0.50616	0.8322
GO:0010715	regulation of extracellular matrix disassembly	25	4	1.43	3005	0.50668	0.557
GO:0006584	catecholamine metabolic process	82	7	4.69	1877	0.50674	0.35793
GO:1904668	positive regulation of ubiquitin protein ligase activity	178	12	10.19	6338	0.50686	0.98152
GO:0006924	activation-induced cell death of T cells	23	3	1.32	5270	0.50689	0.89161
GO:0033173	calcineurin-NFAT signaling cascade	44	4	2.52	813	0.50694	0.14723
GO:1904948	midbrain dopaminergic neuron differentiation	30	3	1.72	3137	0.50698	0.57836
GO:0070206	protein trimerization	68	5	3.89	2297	0.50702	0.43574
GO:0060119	inner ear receptor cell development	71	5	4.07	5519	0.50706	0.91633
GO:0001945	lymph vessel development	40	3	2.29	4342	0.50712	0.77397
GO:0002313	mature B cell differentiation involved in immune response	25	2	1.43	5518	0.50715	0.91614
GO:0006704	glucocorticoid biosynthetic process	25	2	1.43	2748	0.50715	0.51781
GO:0072643	interferon-gamma secretion	28	2	1.6	5183	0.50719	0.88221
GO:1901894	regulation of calcium-transporting ATPase activity	12	1	0.69	3199	0.50721	0.58956
GO:2000667	positive regulation of interleukin-13 secretion	12	1	0.69	4458	0.50721	0.7921
GO:0070572	positive regulation of neuron projection regeneration	12	1	0.69	2669	0.50721	0.50379
GO:2000617	positive regulation of histone H3-K9 acetylation	12	1	0.69	745	0.50721	0.13311
GO:0070508	cholesterol import	12	1	0.69	4861	0.50721	0.84346
GO:0001833	inner cell mass cell proliferation	12	1	0.69	2889	0.50721	0.53866
GO:0010511	regulation of phosphatidylinositol biosynthetic process	12	1	0.69	4437	0.50721	0.78942
GO:0000097	sulfur amino acid biosynthetic process	12	1	0.69	3786	0.50721	0.68455
GO:1900041	negative regulation of interleukin-2 secretion	12	1	0.69	5182	0.50721	0.88219
GO:0032490	detection of molecule of bacterial origin	12	1	0.69	3021	0.50721	0.56009
GO:0072177	mesonephric duct development	12	1	0.69	716	0.50721	0.12562
GO:0072284	metanephric S-shaped body morphogenesis	12	1	0.69	1488	0.50721	0.28018
GO:0021603	cranial nerve formation	12	1	0.69	5131	0.50721	0.87591
GO:0050923	regulation of negative chemotaxis	12	1	0.69	2292	0.50721	0.43435
GO:0060385	axonogenesis involved in innervation	12	1	0.69	4173	0.50721	0.75039
GO:0035461	vitamin transmembrane transport	12	1	0.69	487	0.50721	0.07786
GO:0033632	regulation of cell-cell adhesion mediated by integrin	12	1	0.69	6115	0.50721	0.96765
GO:0048743	positive regulation of skeletal muscle fiber development	12	1	0.69	2276	0.50721	0.43174
GO:0060449	bud elongation involved in lung branching	12	1	0.69	1498	0.50721	0.28105
GO:0048570	notochord morphogenesis	12	1	0.69	5342	0.50721	0.89871
GO:0031340	positive regulation of vesicle fusion	12	1	0.69	2226	0.50721	0.42388
GO:0060179	male mating behavior	12	1	0.69	6237	0.50721	0.97558
GO:1903377	negative regulation of oxidative stress-induced neuron intrinsic apoptotic signaling pathway	12	1	0.69	3911	0.50721	0.70495
GO:0048630	skeletal muscle tissue growth	12	1	0.69	1336	0.50721	0.24945
GO:1902083	negative regulation of peptidyl-cysteine S-nitrosylation	12	1	0.69	1085	0.50721	0.19289
GO:0032509	endosome transport via multivesicular body sorting pathway	12	1	0.69	1990	0.50721	0.38154
GO:0035897	proteolysis in other organism	12	1	0.69	3450	0.50721	0.62908
GO:0015810	aspartate transport	12	1	0.69	5422	0.50721	0.90762
GO:0051890	regulation of cardioblast differentiation	12	1	0.69	3323	0.50721	0.61002
GO:0035641	locomotory exploration behavior	12	1	0.69	370	0.50721	0.05329
GO:0002368	B cell cytokine production	12	1	0.69	267	0.50721	0.03539
GO:0070072	vacuolar proton-transporting V-type ATPase complex assembly	12	1	0.69	5212	0.50721	0.88535
GO:0009445	putrescine metabolic process	12	1	0.69	323	0.50721	0.04599
GO:1902414	protein localization to cell junction	12	1	0.69	2674	0.50721	0.50435
GO:0071638	negative regulation of monocyte chemotactic protein-1 production	12	1	0.69	1872	0.50721	0.35696
GO:1903546	protein localization to photoreceptor outer segment	12	1	0.69	598	0.50721	0.10338
GO:0035999	tetrahydrofolate interconversion	12	1	0.69	4036	0.50721	0.72554
GO:0006702	androgen biosynthetic process	12	1	0.69	1233	0.50721	0.22642
GO:2000344	positive regulation of acrosome reaction	12	1	0.69	4216	0.50721	0.75674
GO:0009221	pyrimidine deoxyribonucleotide biosynthetic process	12	1	0.69	880	0.50721	0.15858
GO:0046826	negative regulation of protein export from nucleus	12	1	0.69	3223	0.50721	0.59414
GO:0070327	thyroid hormone transport	12	1	0.69	1296	0.50721	0.24131
GO:0006573	valine metabolic process	12	1	0.69	276	0.50721	0.03734
GO:1902715	positive regulation of interferon-gamma secretion	12	1	0.69	4178	0.50721	0.75134
GO:0061325	cell proliferation involved in outflow tract morphogenesis	12	1	0.69	3158	0.50721	0.58145
GO:0045136	development of secondary sexual characteristics	12	1	0.69	5087	0.50721	0.86988
GO:0034214	protein hexamerization	12	1	0.69	838	0.50721	0.15149
GO:0097264	self proteolysis	12	1	0.69	1745	0.50721	0.3337
GO:0061140	lung secretory cell differentiation	12	1	0.69	3591	0.50721	0.65266
GO:0014721	twitch skeletal muscle contraction	12	1	0.69	1102	0.50721	0.197
GO:0014732	skeletal muscle atrophy	12	1	0.69	5289	0.50721	0.89378
GO:0014894	response to denervation involved in regulation of muscle adaptation	12	1	0.69	731	0.50721	0.12806
GO:0072033	renal vesicle formation	12	1	0.69	2221	0.50721	0.42365
GO:0002677	negative regulation of chronic inflammatory response	12	1	0.69	5849	0.50721	0.94675
GO:2000848	positive regulation of corticosteroid hormone secretion	12	1	0.69	216	0.50721	0.02456
GO:0050713	negative regulation of interleukin-1 beta secretion	12	1	0.69	4814	0.50721	0.83731
GO:0046951	ketone body biosynthetic process	12	1	0.69	478	0.50721	0.07613
GO:0071218	cellular response to misfolded protein	30	2	1.72	2114	0.50722	0.40135
GO:0044342	type B pancreatic cell proliferation	31	2	1.77	1774	0.50723	0.33909
GO:0007568	aging	496	26	28.4	4901	0.50732	0.84871
GO:0003401	axis elongation	43	2	2.46	4797	0.50739	0.83458
GO:0014037	Schwann cell differentiation	59	2	3.38	4146	0.5076	0.74485
GO:0033135	regulation of peptidyl-serine phosphorylation	202	10	11.57	2149	0.50765	0.40758
GO:0051224	negative regulation of protein transport	351	18	20.1	2645	0.50778	0.49903
GO:0046651	lymphocyte proliferation	423	21	24.22	431	0.50805	0.06729
GO:0032535	regulation of cellular component size	580	30	33.21	1905	0.50805	0.36482
GO:0046902	regulation of mitochondrial membrane permeability	113	3	6.47	5374	0.50809	0.9034
GO:0033157	regulation of intracellular protein transport	646	30	36.99	4077	0.50895	0.73304
GO:0043277	apoptotic cell clearance	69	5	3.95	5552	0.50899	0.91976
GO:0043270	positive regulation of ion transport	340	12	19.47	1399	0.50904	0.25982
GO:0031297	replication fork processing	47	3	2.69	4035	0.50931	0.72548
GO:0006929	substrate-dependent cell migration	47	3	2.69	4483	0.50931	0.79493
GO:0030819	positive regulation of cAMP biosynthetic process	117	7	6.7	2172	0.50932	0.41325
GO:0019882	antigen processing and presentation	363	21	20.78	1640	0.50936	0.31274
GO:0048678	response to axon injury	113	6	6.47	4377	0.50966	0.77927
GO:0060322	head development	1230	57	70.42	746	0.51056	0.13328
GO:0009165	nucleotide biosynthetic process	515	43	29.49	1026	0.51406	0.18162
GO:0002009	morphogenesis of an epithelium	880	51	50.38	3072	0.51874	0.56846
GO:0051180	vitamin transport	42	3	2.4	5401	0.51875	0.90601
GO:0001774	microglial cell activation	30	2	1.72	4902	0.51886	0.84875
GO:0010894	negative regulation of steroid biosynthetic process	30	2	1.72	3710	0.51886	0.67257
GO:0010569	regulation of double-strand break repair via homologous recombination	30	2	1.72	2070	0.51886	0.3948
GO:1900025	negative regulation of substrate adhesion-dependent cell spreading	30	2	1.72	6000	0.51886	0.95763
GO:0051450	myoblast proliferation	30	2	1.72	389	0.51886	0.05827
GO:0022602	ovulation cycle process	135	8	7.73	453	0.51887	0.07132
GO:0034314	Arp2/3 complex-mediated actin nucleation	59	3	3.38	2621	0.5191	0.4955
GO:0035264	multicellular organism growth	257	16	14.71	5685	0.51969	0.93241
GO:0071417	cellular response to organonitrogen compound	810	40	46.38	574	0.5213	0.09807
GO:0006378	mRNA polyadenylation	64	4	3.66	4533	0.52358	0.80023
GO:0002026	regulation of the force of heart contraction	48	3	2.75	4020	0.52362	0.72316
GO:1901264	carbohydrate derivative transport	80	4	4.58	2540	0.52399	0.48139
GO:0019226	transmission of nerve impulse	109	5	6.24	2953	0.52428	0.54875
GO:0001889	liver development	210	11	12.02	4593	0.52455	0.80768
GO:0008584	male gonad development	226	13	12.94	4125	0.52472	0.74091
GO:0010501	RNA secondary structure unwinding	66	4	3.78	5477	0.52709	0.91194
GO:0032467	positive regulation of cytokinesis	66	4	3.78	2211	0.52709	0.42231
GO:0051346	negative regulation of hydrolase activity	653	28	37.39	332	0.52801	0.04814
GO:0061337	cardiac conduction	244	11	13.97	2507	0.52877	0.47508
GO:0019752	carboxylic acid metabolic process	1401	97	80.21	309	0.53039	0.04393
GO:0006415	translational termination	155	20	8.87	120	0.53283	0.01123
GO:0051896	regulation of protein kinase B signaling	207	16	11.85	832	0.5345	0.15029
GO:0043535	regulation of blood vessel endothelial cell migration	101	9	5.78	5215	0.53473	0.88573
GO:0010948	negative regulation of cell cycle process	429	30	24.56	1346	0.53477	0.25066
GO:0070192	chromosome organization involved in meiotic cell cycle	107	8	6.13	5938	0.53505	0.95322
GO:0071322	cellular response to carbohydrate stimulus	198	12	11.34	4786	0.53534	0.83325
GO:0033136	serine phosphorylation of STAT3 protein	13	1	0.74	865	0.53544	0.15546
GO:0034651	cortisol biosynthetic process	13	1	0.74	1178	0.53544	0.21422
GO:1901858	regulation of mitochondrial DNA metabolic process	13	1	0.74	1232	0.53544	0.22624
GO:0033240	positive regulation of cellular amine metabolic process	13	1	0.74	763	0.53544	0.13731
GO:0021894	cerebral cortex GABAergic interneuron development	13	1	0.74	5656	0.53544	0.92959
GO:0021860	pyramidal neuron development	13	1	0.74	1241	0.53544	0.22771
GO:0060068	vagina development	13	1	0.74	299	0.53544	0.04131
GO:0030578	PML body organization	13	1	0.74	4741	0.53544	0.82679
GO:0007084	mitotic nuclear envelope reassembly	13	1	0.74	5807	0.53544	0.94305
GO:0080009	mRNA methylation	13	1	0.74	4093	0.53544	0.73596
GO:0000056	ribosomal small subunit export from nucleus	13	1	0.74	300	0.53544	0.04188
GO:0010692	regulation of alkaline phosphatase activity	13	1	0.74	5104	0.53544	0.87184
GO:0032308	positive regulation of prostaglandin secretion	13	1	0.74	4979	0.53544	0.85836
GO:0010666	positive regulation of cardiac muscle cell apoptotic process	13	1	0.74	1054	0.53544	0.18651
GO:0010635	regulation of mitochondrial fusion	13	1	0.74	1823	0.53544	0.34613
GO:0021612	facial nerve structural organization	13	1	0.74	3668	0.53544	0.66523
GO:1903054	negative regulation of extracellular matrix organization	13	1	0.74	539	0.53544	0.08939
GO:0072282	metanephric nephron tubule morphogenesis	13	1	0.74	543	0.53544	0.09002
GO:0003097	renal water transport	13	1	0.74	1103	0.53544	0.19754
GO:0045906	negative regulation of vasoconstriction	13	1	0.74	6244	0.53544	0.97571
GO:1900364	negative regulation of mRNA polyadenylation	13	1	0.74	3749	0.53544	0.67872
GO:0006011	UDP-glucose metabolic process	13	1	0.74	2575	0.53544	0.48751
GO:0032700	negative regulation of interleukin-17 production	13	1	0.74	2591	0.53544	0.49096
GO:0060158	phospholipase C-activating dopamine receptor signaling pathway	13	1	0.74	5657	0.53544	0.92959
GO:0032876	negative regulation of DNA endoreduplication	13	1	0.74	4213	0.53544	0.75647
GO:0032825	positive regulation of natural killer cell differentiation	13	1	0.74	5569	0.53544	0.92099
GO:0003374	dynamin family protein polymerization involved in mitochondrial fission	13	1	0.74	5431	0.53544	0.90846
GO:0035754	B cell chemotaxis	13	1	0.74	4663	0.53544	0.81754
GO:0032621	interleukin-18 production	13	1	0.74	6174	0.53544	0.97123
GO:0006489	dolichyl diphosphate biosynthetic process	13	1	0.74	2293	0.53544	0.43462
GO:1903798	regulation of production of miRNAs involved in gene silencing by miRNA	13	1	0.74	767	0.53544	0.1379
GO:0035696	monocyte extravasation	13	1	0.74	772	0.53544	0.13921
GO:0071803	positive regulation of podosome assembly	13	1	0.74	4329	0.53544	0.77136
GO:0045080	positive regulation of chemokine biosynthetic process	13	1	0.74	5626	0.53544	0.92729
GO:0051593	response to folic acid	13	1	0.74	1282	0.53544	0.23827
GO:0071550	death-inducing signaling complex assembly	13	1	0.74	5235	0.53544	0.88818
GO:0060509	Type I pneumocyte differentiation	13	1	0.74	4897	0.53544	0.84805
GO:0035646	endosome to melanosome transport	13	1	0.74	5253	0.53544	0.89003
GO:0071578	zinc II ion transmembrane import	13	1	0.74	4640	0.53544	0.81433
GO:0002315	marginal zone B cell differentiation	13	1	0.74	6221	0.53544	0.97418
GO:0060631	regulation of meiosis I	13	1	0.74	3263	0.53544	0.60133
GO:0032926	negative regulation of activin receptor signaling pathway	13	1	0.74	4011	0.53544	0.72135
GO:0032930	positive regulation of superoxide anion generation	13	1	0.74	2113	0.53544	0.40132
GO:1902474	positive regulation of protein localization to synapse	13	1	0.74	1984	0.53544	0.38049
GO:0090045	positive regulation of deacetylase activity	13	1	0.74	2754	0.53544	0.51866
GO:0051639	actin filament network formation	13	1	0.74	4845	0.53544	0.84147
GO:0006857	oligopeptide transport	13	1	0.74	4265	0.53544	0.76342
GO:0089711	L-glutamate transmembrane transport	13	1	0.74	5161	0.53544	0.87923
GO:0043652	engulfment of apoptotic cell	13	1	0.74	4955	0.53544	0.85517
GO:0070344	regulation of fat cell proliferation	13	1	0.74	5649	0.53544	0.92911
GO:0006545	glycine biosynthetic process	13	1	0.74	5227	0.53544	0.8869
GO:0061356	regulation of Wnt protein secretion	13	1	0.74	676	0.53544	0.11842
GO:0070459	prolactin secretion	13	1	0.74	183	0.53544	0.01948
GO:0045162	clustering of voltage-gated sodium channels	13	1	0.74	1692	0.53544	0.32303
GO:0042761	very long-chain fatty acid biosynthetic process	13	1	0.74	3502	0.53544	0.63612
GO:0030497	fatty acid elongation	13	1	0.74	3503	0.53544	0.63612
GO:0097105	presynaptic membrane assembly	13	1	0.74	4650	0.53544	0.81531
GO:0043983	histone H4-K12 acetylation	13	1	0.74	525	0.53544	0.08622
GO:0090286	cytoskeletal anchoring at nuclear membrane	13	1	0.74	6073	0.53544	0.9642
GO:0002679	respiratory burst involved in defense response	13	1	0.74	1563	0.53544	0.2935
GO:2000553	positive regulation of T-helper 2 cell cytokine production	13	1	0.74	3797	0.53544	0.68672
GO:0032049	cardiolipin biosynthetic process	13	1	0.74	3886	0.53544	0.7004
GO:0022605	oogenesis stage	13	1	0.74	3993	0.53544	0.71837
GO:1901725	regulation of histone deacetylase activity	13	1	0.74	2755	0.53544	0.51866
GO:0090281	negative regulation of calcium ion import	31	2	1.77	602	0.53544	0.10398
GO:0002544	chronic inflammatory response	32	2	1.83	5356	0.53546	0.90058
GO:1903727	positive regulation of phospholipid metabolic process	69	4	3.95	3574	0.53549	0.64997
GO:0002438	acute inflammatory response to antigenic stimulus	35	2	2	2551	0.5355	0.48364
GO:0071875	adrenergic receptor signaling pathway	39	2	2.23	1653	0.53555	0.31427
GO:0060491	regulation of cell projection assembly	209	10	11.97	6254	0.53597	0.97606
GO:0097529	myeloid leukocyte migration	235	11	13.46	533	0.53609	0.08867
GO:0090276	regulation of peptide hormone secretion	325	16	18.61	1845	0.53613	0.35102
GO:0032963	collagen metabolic process	177	7	10.13	4215	0.53625	0.7567
GO:0097345	mitochondrial outer membrane permeabilization	90	2	5.15	462	0.53625	0.07319
GO:0009154	purine ribonucleotide catabolic process	69	5	3.95	639	0.53637	0.11093
GO:0035601	protein deacylation	185	6	10.59	2810	0.5366	0.52706
GO:0050880	regulation of blood vessel size	220	8	12.6	5453	0.5366	0.91032
GO:0021756	striatum development	31	2	1.77	634	0.53666	0.11047
GO:0050910	detection of mechanical stimulus involved in sensory perception of sound	31	2	1.77	128	0.53666	0.01208
GO:0080111	DNA demethylation	31	2	1.77	3640	0.53666	0.65978
GO:0007141	male meiosis I	31	2	1.77	1561	0.53666	0.29234
GO:1902043	positive regulation of extrinsic apoptotic signaling pathway via death domain receptors	31	2	1.77	5873	0.53666	0.94821
GO:0046135	pyrimidine nucleoside catabolic process	31	2	1.77	3593	0.53666	0.65315
GO:1902187	negative regulation of viral release from host cell	31	2	1.77	5974	0.53666	0.95515
GO:0042573	retinoic acid metabolic process	31	2	1.77	4130	0.53666	0.74266
GO:0045880	positive regulation of smoothened signaling pathway	31	2	1.77	1351	0.53666	0.25139
GO:0010259	multicellular organism aging	51	3	2.92	5160	0.53672	0.87921
GO:0050772	positive regulation of axonogenesis	123	7	7.04	2022	0.53676	0.3861
GO:0050684	regulation of mRNA processing	181	5	10.36	6151	0.53678	0.96991
GO:0061178	regulation of insulin secretion involved in cellular response to glucose stimulus	73	4	4.18	4641	0.53681	0.81435
GO:0035904	aorta development	83	4	4.75	5172	0.53701	0.88079
GO:0002376	immune system process	3951	182	226.22	3515	0.53718	0.63834
GO:0031069	hair follicle morphogenesis	49	3	2.81	5023	0.53769	0.86395
GO:2000147	positive regulation of cell motility	705	30	40.37	350	0.53803	0.05035
GO:0015909	long-chain fatty acid transport	92	4	5.27	3389	0.53834	0.61861
GO:0010862	positive regulation of pathway-restricted SMAD protein phosphorylation	67	4	3.84	4462	0.53909	0.79284
GO:1901998	toxin transport	67	4	3.84	1419	0.53909	0.26524
GO:0048705	skeletal system morphogenesis	324	14	18.55	5990	0.53983	0.95677
GO:0006091	generation of precursor metabolites and energy	605	55	34.64	738	0.5422	0.12959
GO:0032088	negative regulation of NF-kappaB transcription factor activity	103	6	5.9	4321	0.54229	0.77056
GO:0008654	phospholipid biosynthetic process	369	27	21.13	2659	0.54891	0.50197
GO:0010803	regulation of tumor necrosis factor-mediated signaling pathway	91	5	5.21	6559	0.5511	0.99219
GO:0010939	regulation of necrotic cell death	50	3	2.86	2274	0.55152	0.43158
GO:0007616	long-term memory	50	3	2.86	4288	0.55152	0.76581
GO:2000352	negative regulation of endothelial cell apoptotic process	50	3	2.86	4460	0.55152	0.79252
GO:0048025	negative regulation of mRNA splicing, via spliceosome	50	3	2.86	5371	0.55152	0.90263
GO:0006958	complement activation, classical pathway	50	3	2.86	4186	0.55152	0.75263
GO:0001525	angiogenesis	732	36	41.91	4033	0.55208	0.7254
GO:0033077	T cell differentiation in thymus	112	5	6.41	6126	0.55221	0.96821
GO:0006081	cellular aldehyde metabolic process	118	11	6.76	1259	0.55253	0.23227
GO:0060048	cardiac muscle contraction	214	9	12.25	2245	0.55305	0.42624
GO:0060314	regulation of ryanodine-sensitive calcium-release channel activity	53	4	3.03	4401	0.55372	0.78383
GO:0045638	negative regulation of myeloid cell differentiation	132	8	7.56	5440	0.55391	0.9092
GO:0043011	myeloid dendritic cell differentiation	32	2	1.83	4656	0.55401	0.81637
GO:0060307	regulation of ventricular cardiac muscle cell membrane repolarization	32	2	1.83	1048	0.55401	0.18524
GO:0051497	negative regulation of stress fiber assembly	32	2	1.83	6050	0.55401	0.96204
GO:0000132	establishment of mitotic spindle orientation	32	2	1.83	1652	0.55401	0.31408
GO:0060259	regulation of feeding behavior	32	2	1.83	2354	0.55401	0.44551
GO:0043101	purine-containing compound salvage	32	2	1.83	1441	0.55401	0.27013
GO:0006471	protein ADP-ribosylation	32	2	1.83	2778	0.55401	0.52272
GO:0051642	centrosome localization	32	2	1.83	5303	0.55401	0.89507
GO:0034453	microtubule anchoring	32	2	1.83	4463	0.55401	0.79284
GO:0046655	folic acid metabolic process	32	2	1.83	6055	0.55401	0.96248
GO:0043984	histone H4-K16 acetylation	32	2	1.83	5107	0.55401	0.8723
GO:0006397	mRNA processing	820	49	46.95	4604	0.55423	0.80947
GO:0010765	positive regulation of sodium ion transport	71	3	4.07	1642	0.55445	0.31288
GO:0045807	positive regulation of endocytosis	176	6	10.08	430	0.55554	0.06729
GO:0003007	heart morphogenesis	372	17	21.3	3948	0.55564	0.7116
GO:0048013	ephrin receptor signaling pathway	176	10	10.08	6380	0.55605	0.98396
GO:0007286	spermatid development	215	12	12.31	2709	0.55624	0.51122
GO:0010243	response to organonitrogen compound	1317	65	75.41	391	0.55648	0.05855
GO:0006986	response to unfolded protein	277	5	15.86	1668	0.5567	0.31733
GO:0045216	cell-cell junction organization	403	15	23.07	3086	0.55701	0.57004
GO:0010035	response to inorganic substance	816	61	46.72	5502	0.55853	0.91482
GO:0045839	negative regulation of mitotic nuclear division	68	9	3.89	1319	0.56086	0.24557
GO:0010594	regulation of endothelial cell migration	212	16	12.14	5693	0.56115	0.93274
GO:0051444	negative regulation of ubiquitin-protein transferase activity	175	13	10.02	6031	0.56137	0.96035
GO:0065002	intracellular protein transmembrane transport	89	8	5.1	5291	0.56139	0.89393
GO:0022412	cellular process involved in reproduction in multicellular organism	448	28	25.65	5272	0.56152	0.89164
GO:1903428	positive regulation of reactive oxygen species biosynthetic process	82	7	4.69	1899	0.56154	0.36358
GO:0071277	cellular response to calcium ion	87	5	4.98	3808	0.56159	0.6892
GO:0060632	regulation of microtubule-based movement	28	3	1.6	608	0.56176	0.10539
GO:0014829	vascular smooth muscle contraction	36	3	2.06	2941	0.56187	0.54615
GO:0045577	regulation of B cell differentiation	39	3	2.23	5208	0.56191	0.88489
GO:0010998	regulation of translational initiation by eIF2 alpha phosphorylation	24	2	1.37	5304	0.56194	0.89522
GO:0010591	regulation of lamellipodium assembly	43	3	2.46	4922	0.56197	0.85123
GO:2000668	regulation of dendritic cell apoptotic process	14	1	0.8	5668	0.56205	0.93037
GO:2000601	positive regulation of Arp2/3 complex-mediated actin nucleation	14	1	0.8	4597	0.56205	0.8082
GO:0021891	olfactory bulb interneuron development	14	1	0.8	1842	0.56205	0.35056
GO:0032342	aldosterone biosynthetic process	14	1	0.8	913	0.56205	0.16324
GO:1904380	endoplasmic reticulum mannose trimming	14	1	0.8	4365	0.56205	0.77759
GO:1901620	regulation of smoothened signaling pathway involved in dorsal/ventral neural tube patterning	14	1	0.8	920	0.56205	0.16372
GO:1904469	positive regulation of tumor necrosis factor secretion	14	1	0.8	1092	0.56205	0.19373
GO:1904424	regulation of GTP binding	14	1	0.8	2845	0.56205	0.53373
GO:0031017	exocrine pancreas development	14	1	0.8	56	0.56205	0.00275
GO:0072235	metanephric distal tubule development	14	1	0.8	2167	0.56205	0.41276
GO:0072203	cell proliferation involved in metanephros development	14	1	0.8	4217	0.56205	0.75678
GO:0050957	equilibrioception	14	1	0.8	4042	0.56205	0.72631
GO:1904238	pericyte cell differentiation	14	1	0.8	798	0.56205	0.14481
GO:0032790	ribosome disassembly	14	1	0.8	138	0.56205	0.01308
GO:0051454	intracellular pH elevation	14	1	0.8	5189	0.56205	0.88264
GO:0048681	negative regulation of axon regeneration	14	1	0.8	859	0.56205	0.15457
GO:0009071	serine family amino acid catabolic process	14	1	0.8	288	0.56205	0.03881
GO:0018026	peptidyl-lysine monomethylation	14	1	0.8	3124	0.56205	0.57553
GO:0071223	cellular response to lipoteichoic acid	14	1	0.8	5187	0.56205	0.8826
GO:0006499	N-terminal protein myristoylation	14	1	0.8	2831	0.56205	0.53068
GO:0060837	blood vessel endothelial cell differentiation	14	1	0.8	6217	0.56205	0.9741
GO:0045040	protein import into mitochondrial outer membrane	14	1	0.8	2134	0.56205	0.40474
GO:0045006	DNA deamination	14	1	0.8	5556	0.56205	0.92033
GO:0042363	fat-soluble vitamin catabolic process	14	1	0.8	3051	0.56205	0.56474
GO:0060600	dichotomous subdivision of an epithelial terminal unit	14	1	0.8	2980	0.56205	0.553
GO:1903599	positive regulation of mitophagy	14	1	0.8	5359	0.56205	0.90075
GO:0009404	toxin metabolic process	14	1	0.8	2273	0.56205	0.43131
GO:0017085	response to insecticide	14	1	0.8	1579	0.56205	0.29847
GO:0045345	positive regulation of MHC class I biosynthetic process	14	1	0.8	5478	0.56205	0.91214
GO:0060923	cardiac muscle cell fate commitment	14	1	0.8	4212	0.56205	0.75641
GO:0051918	negative regulation of fibrinolysis	14	1	0.8	2346	0.56205	0.44369
GO:1901386	negative regulation of voltage-gated calcium channel activity	14	1	0.8	3392	0.56205	0.61906
GO:0006662	glycerol ether metabolic process	14	1	0.8	2270	0.56205	0.43107
GO:0070431	nucleotide-binding oligomerization domain containing 2 signaling pathway	14	1	0.8	6046	0.56205	0.96178
GO:0006610	ribosomal protein import into nucleus	14	1	0.8	3292	0.56205	0.60559
GO:0042747	circadian sleep/wake cycle, REM sleep	14	1	0.8	2516	0.56205	0.47774
GO:0014722	regulation of skeletal muscle contraction by calcium ion signaling	14	1	0.8	337	0.56205	0.04885
GO:0045716	positive regulation of low-density lipoprotein particle receptor biosynthetic process	14	1	0.8	3525	0.56205	0.64015
GO:0002638	negative regulation of immunoglobulin production	14	1	0.8	2395	0.56205	0.45382
GO:0045842	positive regulation of mitotic metaphase/anaphase transition	14	1	0.8	1534	0.56205	0.28634
GO:0032000	positive regulation of fatty acid beta-oxidation	14	1	0.8	2191	0.56205	0.41763
GO:0042987	amyloid precursor protein catabolic process	40	2	2.29	3630	0.56217	0.658
GO:0048668	collateral sprouting	47	2	2.69	2064	0.56226	0.39433
GO:0042116	macrophage activation	107	5	6.13	4910	0.56237	0.84971
GO:0043462	regulation of ATPase activity	97	4	5.55	823	0.56247	0.14941
GO:0032411	positive regulation of transporter activity	126	5	7.21	3652	0.56263	0.6622
GO:0006029	proteoglycan metabolic process	135	4	7.73	564	0.563	0.09614
GO:0048015	phosphatidylinositol-mediated signaling	369	18	21.13	3884	0.5643	0.70027
GO:0051091	positive regulation of sequence-specific DNA binding transcription factor activity	389	18	22.27	6040	0.56449	0.96108
GO:0007219	Notch signaling pathway	274	13	15.69	4368	0.56465	0.77854
GO:0006936	muscle contraction	578	28	33.09	1606	0.56466	0.30413
GO:0009056	catabolic process	3628	285	207.72	876	0.56484	0.15818
GO:0051281	positive regulation of release of sequestered calcium ion into cytosol	62	4	3.55	5057	0.56493	0.8663
GO:0051290	protein heterotetramerization	51	3	2.92	2190	0.5651	0.41755
GO:2000778	positive regulation of interleukin-6 secretion	51	3	2.92	1937	0.5651	0.37084
GO:0046903	secretion	1812	84	103.75	733	0.5672	0.12884
GO:0050850	positive regulation of calcium-mediated signaling	59	6	3.38	2798	0.56997	0.52557
GO:0042181	ketone biosynthetic process	47	3	2.69	3689	0.57081	0.66845
GO:0048266	behavioral response to pain	33	2	1.89	740	0.57088	0.13219
GO:0045948	positive regulation of translational initiation	33	2	1.89	4040	0.57088	0.72597
GO:0046599	regulation of centriole replication	33	2	1.89	1759	0.57088	0.33599
GO:0051968	positive regulation of synaptic transmission, glutamatergic	33	2	1.89	3278	0.57088	0.60372
GO:0051900	regulation of mitochondrial depolarization	33	2	1.89	2804	0.57088	0.52624
GO:0097150	neuronal stem cell population maintenance	33	2	1.89	6159	0.57088	0.97054
GO:0061154	endothelial tube morphogenesis	33	2	1.89	5625	0.57088	0.92727
GO:0090136	epithelial cell-cell adhesion	33	2	1.89	6303	0.57088	0.97882
GO:0007126	meiotic nuclear division	287	16	16.43	2683	0.57108	0.50621
GO:0048639	positive regulation of developmental growth	280	15	16.03	3010	0.5713	0.55806
GO:0031018	endocrine pancreas development	75	3	4.29	5582	0.57139	0.92321
GO:0042060	wound healing	892	37	51.07	2179	0.57268	0.41467
GO:0008016	regulation of heart contraction	408	18	23.36	1355	0.57289	0.25219
GO:0051047	positive regulation of secretion	618	28	35.38	496	0.57365	0.08005
GO:0071805	potassium ion transmembrane transport	310	13	17.75	4557	0.57389	0.80339
GO:0051028	mRNA transport	257	15	14.71	3161	0.57397	0.58208
GO:0033572	transferrin transport	52	3	2.98	5292	0.57842	0.89423
GO:0007190	activation of adenylate cyclase activity	52	3	2.98	4666	0.57842	0.81772
GO:0017158	regulation of calcium ion-dependent exocytosis	100	5	5.73	851	0.57876	0.15313
GO:0030512	negative regulation of transforming growth factor beta receptor signaling pathway	125	7	7.16	2794	0.57877	0.52438
GO:0051149	positive regulation of muscle cell differentiation	154	8	8.82	5315	0.5788	0.8963
GO:0031175	neuron projection development	1397	56	79.99	1386	0.57893	0.258
GO:0043410	positive regulation of MAPK cascade	852	50	48.78	2890	0.58124	0.53866
GO:0009142	nucleoside triphosphate biosynthetic process	136	21	7.79	3580	0.58392	0.65094
GO:0050821	protein stabilization	234	13	13.4	3679	0.58492	0.66721
GO:0032872	regulation of stress-activated MAPK cascade	361	23	20.67	1615	0.58659	0.30704
GO:0007635	chemosensory behavior	30	4	1.72	2823	0.58661	0.5296
GO:0007031	peroxisome organization	54	5	3.09	4084	0.5867	0.73444
GO:0007617	mating behavior	39	4	2.23	1140	0.58674	0.2063
GO:0031167	rRNA methylation	32	3	1.83	281	0.58688	0.03829
GO:0033555	multicellular organismal response to stress	155	10	8.87	2689	0.58689	0.50711
GO:0034332	adherens junction organization	225	10	12.88	3576	0.58694	0.65026
GO:0060997	dendritic spine morphogenesis	72	5	4.12	3785	0.58696	0.68453
GO:0090382	phagosome maturation	56	4	3.21	1884	0.58698	0.3592
GO:0097028	dendritic cell differentiation	74	5	4.24	5767	0.58698	0.93849
GO:0045986	negative regulation of smooth muscle contraction	25	2	1.43	2723	0.58703	0.51307
GO:0010560	positive regulation of glycoprotein biosynthetic process	26	2	1.49	6062	0.58705	0.96303
GO:0060049	regulation of protein glycosylation	26	2	1.49	5580	0.58705	0.9228
GO:0086019	cell-cell signaling involved in cardiac conduction	46	3	2.63	930	0.58708	0.16461
GO:0051127	positive regulation of actin nucleation	29	2	1.66	5471	0.58709	0.91133
GO:0033147	negative regulation of intracellular estrogen receptor signaling pathway	15	1	0.86	1368	0.58714	0.2551
GO:0021785	branchiomotor neuron axon guidance	15	1	0.86	5213	0.58714	0.88552
GO:0001886	endothelial cell morphogenesis	15	1	0.86	4580	0.58714	0.8059
GO:0001514	selenocysteine incorporation	15	1	0.86	1077	0.58714	0.19158
GO:0010510	regulation of acetyl-CoA biosynthetic process from pyruvate	15	1	0.86	2320	0.58714	0.43875
GO:0021563	glossopharyngeal nerve development	15	1	0.86	273	0.58714	0.03697
GO:0000059	protein import into nucleus, docking	15	1	0.86	4380	0.58714	0.78014
GO:0050966	detection of mechanical stimulus involved in sensory perception of pain	15	1	0.86	1593	0.58714	0.30223
GO:0060340	positive regulation of type I interferon-mediated signaling pathway	15	1	0.86	6110	0.58714	0.96715
GO:0043000	Golgi to plasma membrane CFTR protein transport	15	1	0.86	1939	0.58714	0.37129
GO:0071372	cellular response to follicle-stimulating hormone stimulus	15	1	0.86	5152	0.58714	0.87839
GO:0032725	positive regulation of granulocyte macrophage colony-stimulating factor production	15	1	0.86	6162	0.58714	0.97081
GO:0000480	endonucleolytic cleavage in 5'-ETS of tricistronic rRNA transcript (SSU-rRNA, 5.8S rRNA, LSU-rRNA)	15	1	0.86	4854	0.58714	0.84241
GO:0071420	cellular response to histamine	15	1	0.86	4859	0.58714	0.84343
GO:0006048	UDP-N-acetylglucosamine biosynthetic process	15	1	0.86	874	0.58714	0.15782
GO:0048548	regulation of pinocytosis	15	1	0.86	3370	0.58714	0.6159
GO:1900225	regulation of NLRP3 inflammasome complex assembly	15	1	0.86	6131	0.58714	0.96872
GO:0035871	protein K11-linked deubiquitination	15	1	0.86	5276	0.58714	0.89256
GO:0035878	nail development	15	1	0.86	1941	0.58714	0.37141
GO:0000712	resolution of meiotic recombination intermediates	15	1	0.86	955	0.58714	0.16975
GO:0022028	tangential migration from the subventricular zone to the olfactory bulb	15	1	0.86	1616	0.58714	0.30755
GO:0006307	DNA dealkylation involved in DNA repair	15	1	0.86	330	0.58714	0.04739
GO:0035562	negative regulation of chromatin binding	15	1	0.86	1218	0.58714	0.22244
GO:2000047	regulation of cell-cell adhesion mediated by cadherin	15	1	0.86	3999	0.58714	0.71946
GO:0032927	positive regulation of activin receptor signaling pathway	15	1	0.86	2496	0.58714	0.47308
GO:0032933	SREBP signaling pathway	15	1	0.86	6057	0.58714	0.96265
GO:0038180	nerve growth factor signaling pathway	15	1	0.86	5088	0.58714	0.87002
GO:0009169	purine ribonucleoside monophosphate catabolic process	15	1	0.86	879	0.58714	0.15854
GO:1901033	positive regulation of response to reactive oxygen species	15	1	0.86	4228	0.58714	0.75834
GO:0031659	positive regulation of cyclin-dependent protein serine/threonine kinase activity involved in G1/S tr...	15	1	0.86	2313	0.58714	0.43782
GO:0002115	store-operated calcium entry	15	1	0.86	4363	0.58714	0.77736
GO:0034498	early endosome to Golgi transport	15	1	0.86	1294	0.58714	0.24059
GO:0046855	inositol phosphate dephosphorylation	15	1	0.86	3418	0.58714	0.62292
GO:0009750	response to fructose	15	1	0.86	4232	0.58714	0.75866
GO:0045414	regulation of interleukin-8 biosynthetic process	15	1	0.86	3623	0.58714	0.65741
GO:0045176	apical protein localization	15	1	0.86	6344	0.58714	0.98193
GO:0031987	locomotion involved in locomotory behavior	15	1	0.86	5020	0.58714	0.86352
GO:0070170	regulation of tooth mineralization	15	1	0.86	3153	0.58714	0.58076
GO:0016045	detection of bacterium	15	1	0.86	1807	0.58714	0.34337
GO:1902514	regulation of calcium ion transmembrane transport via high voltage-gated calcium channel	15	1	0.86	5191	0.58714	0.88308
GO:0034773	histone H4-K20 trimethylation	15	1	0.86	5263	0.58714	0.89096
GO:0097201	negative regulation of transcription from RNA polymerase II promoter in response to stress	15	1	0.86	3568	0.58714	0.64909
GO:0070723	response to cholesterol	33	2	1.89	4371	0.58714	0.77875
GO:0021895	cerebral cortex neuron differentiation	34	2	1.95	1437	0.58716	0.26936
GO:0060384	innervation	46	3	2.63	5385	0.58718	0.90435
GO:0007520	myoblast fusion	64	4	3.66	5666	0.58719	0.93033
GO:0006658	phosphatidylserine metabolic process	37	2	2.12	5038	0.5872	0.86483
GO:0032469	endoplasmic reticulum calcium ion homeostasis	50	3	2.86	4111	0.58726	0.73828
GO:0070584	mitochondrion morphogenesis	34	2	1.95	5877	0.58729	0.9484
GO:0032331	negative regulation of chondrocyte differentiation	34	2	1.95	3071	0.58729	0.56822
GO:0033599	regulation of mammary gland epithelial cell proliferation	34	2	1.95	243	0.58729	0.03053
GO:0002089	lens morphogenesis in camera-type eye	34	2	1.95	396	0.58729	0.0598
GO:0006491	N-glycan processing	34	2	1.95	5262	0.58729	0.89071
GO:0055093	response to hyperoxia	34	2	1.95	3411	0.58729	0.62225
GO:0042088	T-helper 1 type immune response	79	4	4.52	6134	0.5873	0.96881
GO:0032924	activin receptor signaling pathway	63	3	3.61	5579	0.58732	0.92261
GO:0046620	regulation of organ growth	121	6	6.93	5375	0.5874	0.90358
GO:0000737	DNA catabolic process, endonucleolytic	71	3	4.07	3835	0.58743	0.69334
GO:0045580	regulation of T cell differentiation	195	10	11.16	2348	0.58746	0.44423
GO:0002762	negative regulation of myeloid leukocyte differentiation	81	4	4.64	505	0.58754	0.08251
GO:0043303	mast cell degranulation	78	3	4.47	3934	0.58784	0.70844
GO:1903959	regulation of anion transmembrane transport	53	3	3.03	503	0.59149	0.08208
GO:1901700	response to oxygen-containing compound	2396	126	137.18	4074	0.59175	0.73258
GO:0001947	heart looping	90	5	5.15	1251	0.59204	0.23041
GO:0010043	response to zinc ion	90	5	5.15	893	0.59204	0.15997
GO:0046907	intracellular transport	3012	236	172.45	3284	0.59223	0.60472
GO:0038061	NIK/NF-kappaB signaling	210	13	12.02	1876	0.59483	0.35789
GO:0006915	apoptotic process	3172	174	181.61	3383	0.59529	0.61778
GO:0000086	G2/M transition of mitotic cell cycle	352	21	20.15	2332	0.5958	0.44028
GO:0034599	cellular response to oxidative stress	398	29	22.79	5024	0.59813	0.86412
GO:0051128	regulation of cellular component organization	3813	168	218.32	822	0.60127	0.1494
GO:0043523	regulation of neuron apoptotic process	397	26	22.73	5035	0.60203	0.8647
GO:0010631	epithelial cell migration	415	26	23.76	3286	0.6024	0.60494
GO:0006368	transcription elongation from RNA polymerase II promoter	133	6	7.61	108	0.60275	0.00992
GO:0009395	phospholipid catabolic process	48	4	2.75	3058	0.60277	0.56581
GO:0008334	histone mRNA metabolic process	52	3	2.98	800	0.60322	0.14545
GO:0003161	cardiac conduction system development	35	2	2	5688	0.60323	0.93247
GO:0031581	hemidesmosome assembly	35	2	2	6605	0.60323	0.99425
GO:0090399	replicative senescence	35	2	2	2247	0.60323	0.42651
GO:0048070	regulation of developmental pigmentation	35	2	2	3565	0.60323	0.64846
GO:0019369	arachidonic acid metabolic process	67	5	3.84	2821	0.60372	0.52879
GO:0007129	synapsis	67	5	3.84	2519	0.60372	0.47812
GO:0072332	intrinsic apoptotic signaling pathway by p53 class mediator	130	5	7.44	3588	0.60411	0.652
GO:0032480	negative regulation of type I interferon production	75	4	4.29	6522	0.60438	0.991
GO:0007420	brain development	1173	54	67.16	5439	0.60529	0.9092
GO:1903507	negative regulation of nucleic acid-templated transcription	1952	74	111.76	2685	0.60636	0.50657
GO:0045815	positive regulation of gene expression, epigenetic	110	6	6.3	1410	0.60717	0.26359
GO:0035338	long-chain fatty-acyl-CoA biosynthetic process	73	4	4.18	2355	0.6076	0.44585
GO:0031100	animal organ regeneration	129	6	7.39	5790	0.60823	0.941
GO:0031396	regulation of protein ubiquitination	471	31	26.97	4396	0.6098	0.78301
GO:0044724	single-organism carbohydrate catabolic process	244	18	13.97	567	0.60981	0.09659
GO:0043069	negative regulation of programmed cell death	1488	88	85.2	3763	0.61009	0.68132
GO:0021675	nerve development	131	10	7.5	4148	0.61019	0.74493
GO:0002262	myeloid cell homeostasis	241	16	13.8	5465	0.61026	0.91089
GO:0097186	amelogenesis	44	3	2.52	198	0.61069	0.02173
GO:0051298	centrosome duplication	101	6	5.78	4787	0.61076	0.83378
GO:0048532	anatomical structure arrangement	33	2	1.89	4451	0.61078	0.79135
GO:0001839	neural plate morphogenesis	16	1	0.92	2523	0.61079	0.47833
GO:1901568	fatty acid derivative metabolic process	16	1	0.92	1010	0.61079	0.17808
GO:0021521	ventral spinal cord interneuron specification	16	1	0.92	1610	0.61079	0.30554
GO:0040015	negative regulation of multicellular organism growth	16	1	0.92	2490	0.61079	0.47189
GO:0032471	negative regulation of endoplasmic reticulum calcium ion concentration	16	1	0.92	6365	0.61079	0.98316
GO:0021670	lateral ventricle development	16	1	0.92	1416	0.61079	0.26462
GO:0044341	sodium-dependent phosphate transport	16	1	0.92	3495	0.61079	0.63546
GO:0072201	negative regulation of mesenchymal cell proliferation	16	1	0.92	3222	0.61079	0.5941
GO:0070933	histone H4 deacetylation	16	1	0.92	5186	0.61079	0.88257
GO:0035404	histone-serine phosphorylation	16	1	0.92	1465	0.61079	0.27603
GO:0032780	negative regulation of ATPase activity	16	1	0.92	3752	0.61079	0.67912
GO:0044252	negative regulation of multicellular organismal metabolic process	16	1	0.92	315	0.61079	0.04501
GO:0032525	somite rostral/caudal axis specification	16	1	0.92	646	0.61079	0.11163
GO:1902035	positive regulation of hematopoietic stem cell proliferation	16	1	0.92	759	0.61079	0.13576
GO:0003266	regulation of secondary heart field cardioblast proliferation	16	1	0.92	5462	0.61079	0.91067
GO:0003211	cardiac ventricle formation	16	1	0.92	1497	0.61079	0.28101
GO:2000059	negative regulation of protein ubiquitination involved in ubiquitin-dependent protein catabolic proc...	16	1	0.92	1379	0.61079	0.25662
GO:0045086	positive regulation of interleukin-2 biosynthetic process	16	1	0.92	4070	0.61079	0.73208
GO:0018344	protein geranylgeranylation	16	1	0.92	185	0.61079	0.01957
GO:0006105	succinate metabolic process	16	1	0.92	2952	0.61079	0.54873
GO:0006107	oxaloacetate metabolic process	16	1	0.92	4289	0.61079	0.76617
GO:0060677	ureteric bud elongation	16	1	0.92	2816	0.61079	0.52809
GO:0061050	regulation of cell growth involved in cardiac muscle cell development	16	1	0.92	4230	0.61079	0.75857
GO:0061000	negative regulation of dendritic spine development	16	1	0.92	6135	0.61079	0.96882
GO:0042182	ketone catabolic process	16	1	0.92	2251	0.61079	0.42682
GO:0034497	protein localization to pre-autophagosomal structure	16	1	0.92	3690	0.61079	0.66859
GO:0045347	negative regulation of MHC class II biosynthetic process	16	1	0.92	6391	0.61079	0.98451
GO:0046541	saliva secretion	16	1	0.92	3271	0.61079	0.60307
GO:0070424	regulation of nucleotide-binding oligomerization domain containing signaling pathway	16	1	0.92	6224	0.61079	0.97456
GO:0036006	cellular response to macrophage colony-stimulating factor stimulus	16	1	0.92	1503	0.61079	0.28172
GO:0048050	post-embryonic eye morphogenesis	16	1	0.92	1000	0.61079	0.17644
GO:0045836	positive regulation of meiotic nuclear division	16	1	0.92	4394	0.61079	0.78248
GO:0033169	histone H3-K9 demethylation	16	1	0.92	4313	0.61079	0.76968
GO:0042537	benzene-containing compound metabolic process	34	2	1.95	5124	0.6108	0.8747
GO:0033627	cell adhesion mediated by integrin	88	5	5.04	5110	0.61082	0.87288
GO:0051279	regulation of release of sequestered calcium ion into cytosol	129	7	7.39	6508	0.6109	0.99044
GO:0021680	cerebellar Purkinje cell layer development	42	2	2.4	2268	0.61091	0.4307
GO:0006691	leukotriene metabolic process	43	2	2.46	507	0.61092	0.08327
GO:0030239	myofibril assembly	97	5	5.55	5770	0.61094	0.93869
GO:0042058	regulation of epidermal growth factor receptor signaling pathway	170	9	9.73	6231	0.61099	0.97523
GO:2001257	regulation of cation channel activity	155	8	8.87	2803	0.61102	0.526
GO:0014823	response to activity	125	8	7.16	6245	0.61103	0.97571
GO:0031023	microtubule organizing center organization	198	10	11.34	5769	0.61114	0.93854
GO:0043616	keratinocyte proliferation	59	2	3.38	1193	0.61115	0.21795
GO:0051341	regulation of oxidoreductase activity	138	6	7.9	628	0.61128	0.10934
GO:0030166	proteoglycan biosynthetic process	89	3	5.1	5746	0.61132	0.93711
GO:0006336	DNA replication-independent nucleosome assembly	82	2	4.69	3143	0.61147	0.57902
GO:0007173	epidermal growth factor receptor signaling pathway	262	14	15	6152	0.61211	0.97007
GO:0071773	cellular response to BMP stimulus	222	3	12.71	1592	0.61321	0.30219
GO:0042592	homeostatic process	2748	147	157.34	3252	0.61364	0.60002
GO:0044702	single organism reproductive process	1956	98	111.99	4412	0.61451	0.78555
GO:0007030	Golgi organization	153	8	8.76	4255	0.61628	0.76152
GO:0060349	bone morphogenesis	133	4	7.61	3900	0.61837	0.70314
GO:0032212	positive regulation of telomere maintenance via telomerase	74	4	4.24	194	0.6184	0.021
GO:0007160	cell-matrix adhesion	375	19	21.47	6423	0.61869	0.98647
GO:0016338	calcium-independent cell-cell adhesion via plasma membrane cell-adhesion molecules	36	2	2.06	493	0.61869	0.0793
GO:0006465	signal peptide processing	36	2	2.06	3377	0.61869	0.61677
GO:1900182	positive regulation of protein localization to nucleus	206	11	11.79	5226	0.61896	0.88688
GO:0031016	pancreas development	123	6	7.04	3913	0.61905	0.70526
GO:1901800	positive regulation of proteasomal protein catabolic process	182	9	10.42	841	0.61919	0.15171
GO:0006814	sodium ion transport	347	16	19.87	4990	0.6203	0.85957
GO:0016567	protein ubiquitination	1380	83	79.01	5611	0.62423	0.92594
GO:0071345	cellular response to cytokine stimulus	1207	54	69.11	2125	0.62436	0.40337
GO:0030154	cell differentiation	6031	283	345.31	5014	0.62526	0.86294
GO:0030216	keratinocyte differentiation	192	12	10.99	804	0.62854	0.14573
GO:0006749	glutathione metabolic process	101	6	5.78	2439	0.62874	0.46335
GO:0030177	positive regulation of Wnt signaling pathway	274	16	15.69	4000	0.62885	0.71979
GO:0045773	positive regulation of axon extension	73	4	4.18	3614	0.62907	0.65548
GO:0035058	nonmotile primary cilium assembly	56	3	3.21	786	0.62908	0.1423
GO:0030501	positive regulation of bone mineralization	56	3	3.21	5061	0.62908	0.86667
GO:0043552	positive regulation of phosphatidylinositol 3-kinase activity	56	3	3.21	6558	0.62908	0.99218
GO:0072329	monocarboxylic acid catabolic process	154	19	8.82	4262	0.63057	0.76303
GO:0030071	regulation of mitotic metaphase/anaphase transition	78	10	4.47	2020	0.63172	0.38551
[truncated: 5,978 more rows]

## Sheet: POSLiu.adjArraySexRaceSite
GO.ID	Term	Annotated	Significant	Expected	Rank in ks_weight01	p.fisher_weight01	p.ks_weight01
GO:0051607	defense response to virus	399	85	20.95	1	1.4e-22	1.4e-16
GO:0060337	type I interferon signaling pathway	138	42	7.24	2	7.2e-22	9.3e-14
GO:0060333	interferon-gamma-mediated signaling pathway	153	37	8.03	4	7.5e-13	1.4e-07
GO:0045071	negative regulation of viral genome replication	79	21	4.15	3	1.2e-10	2.1e-11
GO:0035456	response to interferon-beta	40	14	2.1	5	5.6e-08	7.7e-07
GO:0046135	pyrimidine nucleoside catabolic process	31	8	1.63	113	4.8e-06	0.00258
GO:0035457	cellular response to interferon-alpha	15	7	0.79	39	4.8e-06	0.00038
GO:0048525	negative regulation of viral process	179	32	9.4	47	7.2e-06	0.00057
GO:0035455	response to interferon-alpha	32	14	1.68	11	1.3e-05	1.2e-05
GO:0002377	immunoglobulin production	149	15	7.82	233	2.6e-05	0.00907
GO:0007259	JAK-STAT cascade	271	33	14.23	54	2.6e-05	0.00072
GO:0050727	regulation of inflammatory response	509	56	26.72	26	2.8e-05	0.00014
GO:1902042	negative regulation of extrinsic apoptotic signaling pathway via death domain receptors	58	12	3.04	767	3.9e-05	0.05356
GO:0016032	viral process	2023	186	106.2	499	9.4e-05	0.02796
GO:0050691	regulation of defense response to virus by host	50	9	2.62	181	0.0001	0.0054
GO:0019079	viral genome replication	203	35	10.66	637	0.00011	0.04174
GO:0001915	negative regulation of T cell mediated cytotoxicity	11	5	0.58	92	0.00014	0.00189
GO:0002430	complement receptor mediated signaling pathway	17	6	0.89	7	0.00016	2.2e-06
GO:1900041	negative regulation of interleukin-2 secretion	12	5	0.63	520	0.00023	0.03086
GO:0034154	toll-like receptor 7 signaling pathway	12	5	0.63	10	0.00023	1e-05
GO:0010742	macrophage derived foam cell differentiation	59	6	3.1	289	0.00023	0.0125
GO:0030890	positive regulation of B cell proliferation	60	11	3.15	9	0.00026	6e-06
GO:0008015	blood circulation	895	63	46.98	202	0.00026	0.00664
GO:0051726	regulation of cell cycle	1717	99	90.14	325	0.00036	0.01458
GO:0042511	positive regulation of tyrosine phosphorylation of Stat1 protein	20	6	1.05	98	0.00042	0.00214
GO:0042517	positive regulation of tyrosine phosphorylation of Stat3 protein	64	11	3.36	67	0.00046	0.0012
GO:0051770	positive regulation of nitric-oxide synthase biosynthetic process	14	5	0.73	162	0.00053	0.00436
GO:0060546	negative regulation of necroptotic process	14	5	0.73	765	0.00053	0.05316
GO:0009059	macromolecule biosynthetic process	8707	463	457.09	352	0.00055	0.01682
GO:0045576	mast cell activation	92	12	4.83	217	0.00055	0.00808
GO:0034139	regulation of toll-like receptor 3 signaling pathway	17	4	0.89	369	0.00055	0.01789
GO:0035335	peptidyl-tyrosine dephosphorylation	194	22	10.18	52	0.00057	0.00066
GO:0097296	activation of cysteine-type endopeptidase activity involved in apoptotic signaling pathway	22	6	1.15	460	0.00075	0.0239
GO:0046719	regulation by virus of viral protein levels in host cell	22	6	1.15	60	0.00075	0.00099
GO:0060334	regulation of interferon-gamma-mediated signaling pathway	31	7	1.63	438	0.00094	0.02244
GO:0034341	response to interferon-gamma	276	51	14.49	105	0.001	0.00231
GO:0006958	complement activation, classical pathway	50	9	2.62	163	0.00105	0.00439
GO:0070424	regulation of nucleotide-binding oligomerization domain containing signaling pathway	16	5	0.84	1314	0.00106	0.11409
GO:0051092	positive regulation of NF-kappaB transcription factor activity	244	25	12.81	44	0.00113	0.00048
GO:0051902	negative regulation of mitochondrial depolarization	10	4	0.52	114	0.00123	0.00264
GO:0002329	pre-B cell differentiation	10	4	0.52	269	0.00123	0.01124
GO:0097039	protein linear polyubiquitination	10	4	0.52	395	0.00123	0.01966
GO:0060397	JAK-STAT cascade involved in growth hormone signaling pathway	24	6	1.26	272	0.00123	0.01128
GO:0007567	parturition	17	5	0.89	973	0.00144	0.07357
GO:0050860	negative regulation of T cell receptor signaling pathway	34	7	1.78	335	0.00167	0.0152
GO:0002250	adaptive immune response	616	66	32.34	33	0.00169	0.00025
GO:0032270	positive regulation of cellular protein metabolic process	2477	150	130.03	982	0.00177	0.07524
GO:0039535	regulation of RIG-I signaling pathway	23	6	1.21	416	0.00185	0.02154
GO:0030866	cortical actin cytoskeleton organization	44	8	2.31	142	0.00185	0.0037
GO:2000473	positive regulation of hematopoietic stem cell migration	11	4	0.58	299	0.00185	0.013
GO:0010950	positive regulation of endopeptidase activity	260	19	13.65	484	0.00192	0.02699
GO:0050848	regulation of calcium-mediated signaling	137	9	7.19	497	0.00192	0.02787
GO:1902895	positive regulation of pri-miRNA transcription from RNA polymerase II promoter	35	7	1.84	372	0.00199	0.0182
GO:0035458	cellular response to interferon-beta	27	6	1.42	200	0.00236	0.00658
GO:0043123	positive regulation of I-kappaB kinase/NF-kappaB signaling	323	29	16.96	199	0.00243	0.00653
GO:0055001	muscle cell development	266	21	13.96	1411	0.00246	0.12734
GO:0045824	negative regulation of innate immune response	65	11	3.41	445	0.00246	0.02298
GO:0060039	pericardium development	32	7	1.68	882	0.00247	0.06476
GO:0043097	pyrimidine nucleoside salvage	19	5	1	1670	0.00248	0.15643
GO:0002768	immune response-regulating cell surface receptor signaling pathway	598	60	31.39	164	0.00249	0.00449
GO:0048539	bone marrow development	12	4	0.63	1578	0.00266	0.14413
GO:0060330	regulation of response to interferon-gamma	33	9	1.73	377	0.00273	0.01848
GO:1901739	regulation of myoblast fusion	30	4	1.57	424	0.00275	0.02176
GO:0048285	organelle fission	1038	55	54.49	459	0.00276	0.02377
GO:0007584	response to nutrient	290	32	15.22	343	0.0028	0.01599
GO:0050869	negative regulation of B cell activation	45	9	2.36	691	0.00314	0.04557
GO:0035563	positive regulation of chromatin binding	20	5	1.05	630	0.00317	0.04152
GO:0000723	telomere maintenance	267	15	14.02	1280	0.0032	0.11045
GO:0071222	cellular response to lipopolysaccharide	243	26	12.76	18	0.00337	5.9e-05
GO:0035666	TRIF-dependent toll-like receptor signaling pathway	59	9	3.1	868	0.00346	0.06345
GO:0000122	negative regulation of transcription from RNA polymerase II promoter	1284	89	67.41	12	0.00359	1.2e-05
GO:1902041	regulation of extrinsic apoptotic signaling pathway via death domain receptors	100	18	5.25	1777	0.0036	0.174
GO:0032825	positive regulation of natural killer cell differentiation	13	4	0.68	24	0.00369	0.00011
GO:0034134	toll-like receptor 2 signaling pathway	13	4	0.68	498	0.00369	0.02792
GO:0039530	MDA-5 signaling pathway	13	4	0.68	51	0.00369	0.00066
GO:0045916	negative regulation of complement activation	13	4	0.68	974	0.00369	0.07403
GO:0042102	positive regulation of T cell proliferation	159	13	8.35	144	0.00369	0.00372
GO:0045747	positive regulation of Notch signaling pathway	60	9	3.15	910	0.00389	0.06732
GO:0071407	cellular response to organic cyclic compound	881	69	46.25	132	0.00409	0.00329
GO:0033209	tumor necrosis factor-mediated signaling pathway	291	32	15.28	174	0.00418	0.00502
GO:0008202	steroid metabolic process	433	31	22.73	2054	0.00419	0.2107
GO:2000352	negative regulation of endothelial cell apoptotic process	50	8	2.62	699	0.00424	0.04644
GO:0032648	regulation of interferon-beta production	74	11	3.88	1301	0.00427	0.11324
GO:0045351	type I interferon biosynthetic process	18	5	0.94	66	0.0043	0.00114
GO:0044770	cell cycle phase transition	1015	46	53.28	1055	0.0044	0.08231
GO:0032496	response to lipopolysaccharide	502	50	26.35	15	0.0046	2.9e-05
GO:0030217	T cell differentiation	388	31	20.37	2003	0.0047	0.20464
GO:0006955	immune response	2540	256	133.34	28	0.0047	0.00017
GO:0048661	positive regulation of smooth muscle cell proliferation	117	15	6.14	348	0.00476	0.01628
GO:0006880	intracellular sequestering of iron ion	22	5	1.15	16	0.00493	3e-05
GO:0060837	blood vessel endothelial cell differentiation	14	4	0.73	1452	0.00495	0.13105
GO:0070431	nucleotide-binding oligomerization domain containing 2 signaling pathway	14	4	0.73	1863	0.00495	0.18655
GO:0072203	cell proliferation involved in metanephros development	14	4	0.73	1173	0.00495	0.09798
GO:2000668	regulation of dendritic cell apoptotic process	14	4	0.73	228	0.00495	0.00886
GO:0035264	multicellular organism growth	257	23	13.49	1133	0.0052	0.09322
GO:0010467	gene expression	9012	457	473.1	616	0.00532	0.04019
GO:0043200	response to amino acid	154	14	8.08	1331	0.006	0.1164
GO:0006957	complement activation, alternative pathway	23	5	1.21	2273	0.00603	0.24187
GO:0032495	response to muramyl dipeptide	23	5	1.21	1901	0.00603	0.19162
GO:2000737	negative regulation of stem cell differentiation	23	5	1.21	1947	0.00603	0.19737
GO:0051409	response to nitrosative stress	23	5	1.21	739	0.00603	0.05104
GO:0030334	regulation of cell migration	1182	85	62.05	725	0.00606	0.04921
GO:0072378	blood coagulation, fibrin clot formation	48	7	2.52	2142	0.00646	0.22375
GO:0060340	positive regulation of type I interferon-mediated signaling pathway	15	4	0.79	1395	0.00648	0.12566
GO:0010994	free ubiquitin chain polymerization	15	4	0.79	1147	0.00648	0.09483
GO:0000096	sulfur amino acid metabolic process	54	6	2.83	34	0.00648	0.00026
GO:0034121	regulation of toll-like receptor signaling pathway	84	13	4.41	791	0.00655	0.05574
GO:0035701	hematopoietic stem cell migration	19	7	1	1200	0.00658	0.10141
GO:0002639	positive regulation of immunoglobulin production	48	7	2.52	1340	0.0066	0.11776
GO:2000050	regulation of non-canonical Wnt signaling pathway	32	5	1.68	229	0.00661	0.00886
GO:0070373	negative regulation of ERK1 and ERK2 cascade	101	12	5.3	585	0.00665	0.03711
GO:0048864	stem cell development	132	7	6.93	415	0.00666	0.02129
GO:0032480	negative regulation of type I interferon production	75	10	3.94	171	0.00681	0.00493
GO:0043433	negative regulation of sequence-specific DNA binding transcription factor activity	206	23	10.81	1680	0.00753	0.15823
GO:0051291	protein heterooligomerization	173	16	9.08	1482	0.00775	0.13464
GO:0060544	regulation of necroptotic process	17	7	0.89	579	0.00793	0.03605
GO:0032459	regulation of protein oligomerization	53	8	2.78	1079	0.00794	0.08533
GO:0071267	L-methionine salvage	15	3	0.79	1068	0.00797	0.08371
GO:2000278	regulation of DNA biosynthetic process	186	11	9.76	798	0.00798	0.05682
GO:0070936	protein K48-linked ubiquitination	91	11	4.78	2071	0.00807	0.21422
GO:0051279	regulation of release of sequestered calcium ion into cytosol	129	10	6.77	477	0.00828	0.02574
GO:0060670	branching involved in labyrinthine layer morphogenesis	16	4	0.84	1100	0.00828	0.08704
GO:1900004	negative regulation of serine-type endopeptidase activity	16	4	0.84	820	0.00828	0.059
GO:0019062	virion attachment to host cell	16	4	0.84	1464	0.00828	0.13265
GO:0042058	regulation of epidermal growth factor receptor signaling pathway	170	12	8.92	659	0.00828	0.04332
GO:0071480	cellular response to gamma radiation	45	7	2.36	504	0.00853	0.02847
GO:0034162	toll-like receptor 9 signaling pathway	39	6	2.05	21	0.00872	8.5e-05
GO:0045655	regulation of monocyte differentiation	25	5	1.31	125	0.00873	0.00312
GO:0010803	regulation of tumor necrosis factor-mediated signaling pathway	91	12	4.78	38	0.00886	0.00036
GO:0006954	inflammatory response	1101	102	57.8	29	0.00903	0.0002
GO:0002218	activation of innate immune response	430	53	22.57	110	0.00903	0.00249
GO:0044030	regulation of DNA methylation	35	6	1.84	708	0.00907	0.04721
GO:0002819	regulation of adaptive immune response	239	29	12.55	834	0.00929	0.06042
GO:0045637	regulation of myeloid cell differentiation	308	28	16.17	1931	0.00938	0.1959
GO:0043392	negative regulation of DNA binding	72	12	3.78	687	0.00949	0.0455
GO:0042168	heme metabolic process	43	5	2.26	896	0.00955	0.06607
GO:0007163	establishment or maintenance of cell polarity	278	19	14.59	2540	0.00963	0.2822
GO:0051701	interaction with host	272	28	14.28	1259	0.01012	0.10906
GO:2000678	negative regulation of transcription regulatory region DNA binding	26	5	1.36	1373	0.01035	0.12294
GO:0001672	regulation of chromatin assembly or disassembly	17	4	0.89	17	0.01039	3.8e-05
GO:0043116	negative regulation of vascular permeability	17	4	0.89	948	0.01039	0.07169
GO:0048711	positive regulation of astrocyte differentiation	17	4	0.89	146	0.01039	0.00375
GO:0060047	heart contraction	470	23	24.67	2585	0.01051	0.289
GO:0032481	positive regulation of type I interferon production	127	15	6.67	293	0.0106	0.01273
GO:0031398	positive regulation of protein ubiquitination	345	24	18.11	2867	0.01102	0.32967
GO:0001657	ureteric bud development	162	9	8.5	1839	0.01179	0.18349
GO:0002223	stimulatory C-type lectin receptor signaling pathway	191	18	10.03	3500	0.01201	0.43613
GO:0050688	regulation of defense response to virus	161	26	8.45	1305	0.01274	0.11352
GO:1990001	inhibition of cysteine-type endopeptidase activity involved in apoptotic process	18	4	0.94	1009	0.01281	0.07796
GO:0002903	negative regulation of B cell apoptotic process	18	4	0.94	540	0.01281	0.03221
GO:0060761	negative regulation of response to cytokine stimulus	83	9	4.36	785	0.01306	0.05492
GO:1903077	negative regulation of protein localization to plasma membrane	30	6	1.57	118	0.01307	0.00279
GO:0034638	phosphatidylcholine catabolic process	10	3	0.52	1811	0.01312	0.1785
GO:1904683	regulation of metalloendopeptidase activity	10	3	0.52	2052	0.01312	0.21017
GO:0002481	antigen processing and presentation of exogenous protein antigen via MHC class Ib, TAP-dependent	10	3	0.52	102	0.01312	0.00226
GO:0002765	immune response-inhibiting signal transduction	10	3	0.52	71	0.01312	0.0014
GO:0097368	establishment of Sertoli cell barrier	10	3	0.52	140	0.01312	0.00353
GO:0010737	protein kinase A signaling	44	4	2.31	507	0.01314	0.0291
GO:0007585	respiratory gaseous exchange	113	15	5.93	2444	0.01326	0.26946
GO:0050770	regulation of axonogenesis	271	14	14.23	251	0.0137	0.01014
GO:0031100	animal organ regeneration	129	13	6.77	89	0.01389	0.00184
GO:0043124	negative regulation of I-kappaB kinase/NF-kappaB signaling	108	10	5.67	1419	0.01407	0.1278
GO:0006826	iron ion transport	103	10	5.41	204	0.01414	0.00684
GO:0006206	pyrimidine nucleobase metabolic process	28	5	1.47	1840	0.01418	0.18354
GO:0007165	signal transduction	9084	600	476.88	116	0.01432	0.00273
GO:0001701	in utero embryonic development	542	44	28.45	182	0.0144	0.00545
GO:0034340	response to type I interferon	142	44	7.45	1269	0.01467	0.1096
GO:0045944	positive regulation of transcription from RNA polymerase II promoter	1708	119	89.66	8	0.01488	4.7e-06
GO:0019724	B cell mediated immunity	176	24	9.24	1774	0.01512	0.17368
GO:0001562	response to protozoan	34	7	1.78	532	0.01532	0.03167
GO:0002923	regulation of humoral immune response mediated by circulating immunoglobulin	15	5	0.79	541	0.01534	0.03225
GO:0071888	macrophage apoptotic process	23	5	1.21	1646	0.01535	0.15319
GO:0002577	regulation of antigen processing and presentation	31	5	1.63	666	0.01536	0.04382
GO:1905063	regulation of vascular smooth muscle cell differentiation	15	3	0.79	1738	0.01538	0.16808
GO:2000341	regulation of chemokine (C-X-C motif) ligand 2 production	15	3	0.79	1692	0.01538	0.15991
GO:0002858	regulation of natural killer cell mediated cytotoxicity directed against tumor cell target	18	3	0.94	465	0.01539	0.0244
GO:0090195	chemokine secretion	25	3	1.31	450	0.01539	0.02317
GO:0070168	negative regulation of biomineral tissue development	30	3	1.57	1332	0.0154	0.11684
GO:0048730	epidermis morphogenesis	53	3	2.78	356	0.01542	0.0172
GO:0006367	transcription initiation from RNA polymerase II promoter	315	25	16.54	3726	0.01554	0.4771
GO:0008354	germ cell migration	19	4	1	2941	0.01556	0.34419
GO:0032740	positive regulation of interleukin-17 production	19	4	1	25	0.01556	0.00013
GO:0070266	necroptotic process	46	12	2.41	147	0.01613	0.00377
GO:0042108	positive regulation of cytokine biosynthetic process	88	12	4.62	112	0.01623	0.00257
GO:0043508	negative regulation of JUN kinase activity	29	5	1.52	1669	0.01641	0.15615
GO:0051591	response to cAMP	165	14	8.66	137	0.01644	0.00347
GO:0042127	regulation of cell proliferation	2606	174	136.81	186	0.01653	0.00569
GO:1901343	negative regulation of vasculature development	137	18	7.19	2088	0.01707	0.21621
GO:2001238	positive regulation of extrinsic apoptotic signaling pathway	98	11	5.14	271	0.01709	0.01125
GO:2001169	regulation of ATP biosynthetic process	11	3	0.58	2301	0.01734	0.24733
GO:0044791	positive regulation by host of viral release from host cell	11	3	0.58	2349	0.01734	0.25701
GO:0072162	metanephric mesenchymal cell differentiation	11	3	0.58	890	0.01734	0.06565
GO:0045075	regulation of interleukin-12 biosynthetic process	11	3	0.58	601	0.01734	0.03852
GO:2000346	negative regulation of hepatocyte proliferation	11	3	0.58	2753	0.01734	0.31363
GO:0032532	regulation of microvillus length	11	3	0.58	1874	0.01734	0.18782
GO:0034351	negative regulation of glial cell apoptotic process	11	3	0.58	143	0.01734	0.00372
GO:1901339	regulation of store-operated calcium channel activity	11	3	0.58	870	0.01734	0.0637
GO:2000643	positive regulation of early endosome to late endosome transport	11	3	0.58	732	0.01734	0.05009
GO:0071799	cellular response to prostaglandin D stimulus	11	3	0.58	1407	0.01734	0.12696
GO:0002924	negative regulation of humoral immune response mediated by circulating immunoglobulin	11	3	0.58	1715	0.01734	0.16374
GO:0070527	platelet aggregation	105	13	5.51	206	0.01764	0.0072
GO:0050714	positive regulation of protein secretion	372	21	19.53	3829	0.01809	0.49678
GO:0060712	spongiotrophoblast layer development	20	4	1.05	365	0.01866	0.01751
GO:0045835	negative regulation of meiotic nuclear division	20	4	1.05	2846	0.01866	0.32606
GO:0097320	membrane tubulation	20	4	1.05	255	0.01866	0.0105
GO:0019048	modulation by virus of host morphology or physiology	59	6	3.1	1451	0.01867	0.13088
GO:2000107	negative regulation of leukocyte apoptotic process	76	9	3.99	111	0.01878	0.00251
GO:0042832	defense response to protozoan	30	5	1.57	700	0.01887	0.04651
GO:1900025	negative regulation of substrate adhesion-dependent cell spreading	30	5	1.57	1283	0.01887	0.11067
GO:0043065	positive regulation of apoptotic process	1013	66	53.18	30	0.01929	0.00021
GO:0032088	negative regulation of NF-kappaB transcription factor activity	103	11	5.41	2148	0.01933	0.22428
GO:0008156	negative regulation of DNA replication	83	7	4.36	573	0.01935	0.0353
GO:0001816	cytokine production	1036	100	54.39	1051	0.01991	0.08173
GO:0043547	positive regulation of GTPase activity	1057	69	55.49	6	0.02047	7.8e-07
GO:0030521	androgen receptor signaling pathway	120	14	6.3	1074	0.02057	0.08447
GO:0007492	endoderm development	120	11	6.3	260	0.02147	0.01063
GO:0006921	cellular component disassembly involved in execution phase of apoptosis	115	10	6.04	3381	0.02151	0.41781
GO:0006607	NLS-bearing protein import into nucleus	42	6	2.2	547	0.02152	0.03261
GO:0046597	negative regulation of viral entry into host cell	31	5	1.63	1135	0.02155	0.09333
GO:0045332	phospholipid translocation	31	5	1.63	267	0.02155	0.01108
GO:0042130	negative regulation of T cell proliferation	80	9	4.2	196	0.02178	0.00624
GO:0001836	release of cytochrome c from mitochondria	110	9	5.77	27	0.0221	0.00016
GO:0006878	cellular copper ion homeostasis	21	4	1.1	1361	0.02212	0.12088
GO:0045060	negative thymic T cell selection	21	4	1.1	993	0.02212	0.07669
GO:0090051	negative regulation of cell migration involved in sprouting angiogenesis	21	4	1.1	1092	0.02212	0.0865
GO:0002720	positive regulation of cytokine production involved in immune response	57	8	2.99	2574	0.02212	0.28706
GO:0034105	positive regulation of tissue remodeling	43	5	2.26	333	0.02213	0.01513
GO:0007049	cell cycle	2998	166	157.38	502	0.02222	0.02828
GO:0034383	low-density lipoprotein particle clearance	30	4	1.57	2882	0.02223	0.33241
GO:0014732	skeletal muscle atrophy	12	3	0.63	553	0.02223	0.0336
GO:0046826	negative regulation of protein export from nucleus	12	3	0.63	3156	0.02223	0.37825
GO:0060019	radial glial cell differentiation	12	3	0.63	927	0.02223	0.0691
GO:0034127	regulation of MyD88-independent toll-like receptor signaling pathway	12	3	0.63	742	0.02223	0.0512
GO:0097084	vascular smooth muscle cell development	12	3	0.63	2591	0.02223	0.28975
GO:0035690	cellular response to drug	119	12	6.25	1828	0.02258	0.18172
GO:0045765	regulation of angiogenesis	359	31	18.85	1507	0.02331	0.13688
GO:0009612	response to mechanical stimulus	341	29	17.9	203	0.02336	0.00667
GO:0051209	release of sequestered calcium ion into cytosol	180	16	9.45	915	0.02372	0.06832
GO:0031663	lipopolysaccharide-mediated signaling pathway	74	8	3.88	232	0.0239	0.00904
GO:0034122	negative regulation of toll-like receptor signaling pathway	43	6	2.26	1583	0.02393	0.14449
GO:0035019	somatic stem cell population maintenance	105	11	5.51	786	0.02394	0.05508
GO:0071560	cellular response to transforming growth factor beta stimulus	397	25	20.84	58	0.0242	0.00094
GO:0030032	lamellipodium assembly	98	8	5.14	330	0.02444	0.01485
GO:0070664	negative regulation of leukocyte proliferation	109	14	5.72	2483	0.02455	0.27483
GO:0038093	Fc receptor signaling pathway	361	27	18.95	894	0.02455	0.06596
GO:0045619	regulation of lymphocyte differentiation	236	18	12.39	2365	0.02463	0.25905
GO:0040020	regulation of meiotic nuclear division	42	7	2.2	2163	0.02466	0.22622
GO:0003159	morphogenesis of an endothelium	38	6	1.99	2366	0.02469	0.25909
GO:1902750	negative regulation of cell cycle G2/M phase transition	51	6	2.68	1551	0.02471	0.14103
GO:1902175	regulation of oxidative stress-induced intrinsic apoptotic signaling pathway	60	6	3.15	787	0.02473	0.05526
GO:1905208	negative regulation of cardiocyte differentiation	22	4	1.15	2501	0.02473	0.27744
GO:1901532	regulation of hematopoietic progenitor cell differentiation	22	3	1.15	2441	0.02476	0.26924
GO:0002507	tolerance induction	42	4	2.2	254	0.02476	0.01034
GO:0006974	cellular response to DNA damage stimulus	1376	72	72.24	246	0.02486	0.00981
GO:0031623	receptor internalization	138	12	7.24	827	0.02559	0.05951
GO:0097194	execution phase of apoptosis	163	17	8.56	1153	0.02561	0.09575
GO:0071363	cellular response to growth factor stimulus	1079	60	56.64	3089	0.02572	0.36933
GO:0046847	filopodium assembly	82	10	4.3	183	0.02577	0.00552
GO:0048333	mesodermal cell differentiation	56	7	2.94	3455	0.02587	0.42799
GO:2001214	positive regulation of vasculogenesis	22	4	1.15	2663	0.02594	0.29904
GO:0070102	interleukin-6-mediated signaling pathway	22	4	1.15	2245	0.02594	0.23793
GO:2000121	regulation of removal of superoxide radicals	22	4	1.15	404	0.02594	0.02027
GO:0048535	lymph node development	22	4	1.15	1033	0.02594	0.07987
GO:0050873	brown fat cell differentiation	71	10	3.73	2136	0.02631	0.22282
GO:0071398	cellular response to fatty acid	44	6	2.31	2687	0.02652	0.30317
GO:0043552	positive regulation of phosphatidylinositol 3-kinase activity	56	7	2.94	1364	0.02659	0.12143
GO:0042311	vasodilation	111	11	5.83	2642	0.02748	0.29564
GO:0090527	actin filament reorganization	13	3	0.68	393	0.0278	0.01945
GO:0046085	adenosine metabolic process	13	3	0.68	205	0.0278	0.00711
GO:0051597	response to methylmercury	13	3	0.68	3148	0.0278	0.37738
GO:0006685	sphingomyelin catabolic process	13	3	0.68	1853	0.0278	0.18568
GO:0051639	actin filament network formation	13	3	0.68	1081	0.0278	0.08576
GO:0001973	adenosine receptor signaling pathway	13	3	0.68	1220	0.0278	0.104
GO:0032762	mast cell cytokine production	13	3	0.68	1151	0.0278	0.09561
GO:2000270	negative regulation of fibroblast apoptotic process	13	3	0.68	964	0.0278	0.07303
GO:0010529	negative regulation of transposition	13	3	0.68	316	0.0278	0.01407
GO:0051026	chiasma assembly	13	3	0.68	3450	0.0278	0.42728
GO:0007267	cell-cell signaling	2508	143	131.66	13	0.0282	1.5e-05
GO:0046627	negative regulation of insulin receptor signaling pathway	57	7	2.99	2045	0.02899	0.20932
GO:0045746	negative regulation of Notch signaling pathway	45	6	2.36	671	0.02929	0.04429
GO:1904158	axonemal central apparatus assembly	23	4	1.21	338	0.03013	0.01544
GO:0060218	hematopoietic stem cell differentiation	23	4	1.21	3665	0.03013	0.46541
GO:1903364	positive regulation of cellular protein catabolic process	377	20	19.79	3120	0.03031	0.3731
GO:2001237	negative regulation of extrinsic apoptotic signaling pathway	182	25	9.55	755	0.03034	0.05237
GO:0050852	T cell receptor signaling pathway	295	28	15.49	760	0.03076	0.05273
GO:0032355	response to estradiol	205	15	10.76	1287	0.03106	0.11137
GO:0008593	regulation of Notch signaling pathway	115	17	6.04	777	0.03349	0.05445
GO:0071305	cellular response to vitamin D	28	5	1.47	2103	0.03395	0.21806
GO:0016569	chromatin modification	925	57	48.56	43	0.03399	0.00043
GO:0002726	positive regulation of T cell cytokine production	27	4	1.42	876	0.03401	0.06409
GO:0061314	Notch signaling involved in heart development	14	3	0.73	329	0.03403	0.01477
GO:0030422	production of siRNA involved in RNA interference	14	3	0.73	1991	0.03403	0.20287
GO:0072307	regulation of metanephric nephron tubule epithelial cell differentiation	14	3	0.73	2785	0.03403	0.31783
GO:1900165	negative regulation of interleukin-6 secretion	14	3	0.73	921	0.03403	0.06863
GO:2000510	positive regulation of dendritic cell chemotaxis	14	3	0.73	99	0.03403	0.00219
GO:0065002	intracellular protein transmembrane transport	89	5	4.67	3160	0.03415	0.37885
GO:0030100	regulation of endocytosis	304	25	15.96	970	0.03416	0.07352
GO:0050690	regulation of defense response to virus by virus	59	7	3.1	280	0.03421	0.01189
GO:0050687	negative regulation of defense response to virus	34	5	1.78	2865	0.03466	0.32932
GO:0030033	microvillus assembly	24	4	1.26	2617	0.0347	0.2932
GO:0042312	regulation of vasodilation	71	6	3.73	1157	0.03474	0.09607
GO:0007187	G-protein coupled receptor signaling pathway, coupled to cyclic nucleotide second messenger	287	17	15.07	602	0.03481	0.03857
GO:0030098	lymphocyte differentiation	562	48	29.5	310	0.03506	0.01373
GO:0097581	lamellipodium organization	130	12	6.82	3046	0.0357	0.36403
GO:0010632	regulation of epithelial cell migration	307	21	16.12	726	0.03571	0.04923
GO:2001212	regulation of vasculogenesis	28	6	1.47	1197	0.03573	0.10124
GO:0046879	hormone secretion	472	29	24.78	1375	0.03574	0.12306
GO:0072567	chemokine (C-X-C motif) ligand 2 production	21	5	1.1	1207	0.03576	0.10206
GO:0032692	negative regulation of interleukin-1 production	40	5	2.1	584	0.03581	0.03676
GO:0045625	regulation of T-helper 1 cell differentiation	17	3	0.89	1276	0.03585	0.11007
GO:0070585	protein localization to mitochondrion	346	11	18.16	2129	0.03629	0.22105
GO:0007519	skeletal muscle tissue development	252	15	13.23	612	0.03674	0.03971
GO:0034605	cellular response to heat	207	15	10.87	2575	0.03701	0.2871
GO:0071300	cellular response to retinoic acid	114	11	5.98	3198	0.03731	0.38489
GO:0032728	positive regulation of interferon-beta production	46	6	2.41	179	0.03856	0.00533
GO:0016525	negative regulation of angiogenesis	124	15	6.51	75	0.03879	0.00147
GO:0019229	regulation of vasoconstriction	97	11	5.09	551	0.03936	0.03356
GO:0007204	positive regulation of cytosolic calcium ion concentration	429	36	22.52	1883	0.0394	0.18925
GO:0035556	intracellular signal transduction	4455	310	233.87	240	0.03946	0.00929
GO:0051493	regulation of cytoskeleton organization	703	41	36.91	1234	0.03952	0.10596
GO:0010596	negative regulation of endothelial cell migration	75	8	3.94	4063	0.03953	0.53809
GO:1905331	negative regulation of morphogenesis of an epithelium	25	4	1.31	1667	0.03965	0.1561
GO:0030889	negative regulation of B cell proliferation	25	4	1.31	69	0.03965	0.00132
GO:0043651	linoleic acid metabolic process	25	4	1.31	632	0.03965	0.0416
GO:0097067	cellular response to thyroid hormone stimulus	25	4	1.31	454	0.03965	0.02346
GO:0045618	positive regulation of keratinocyte differentiation	25	4	1.31	3481	0.03965	0.43259
GO:1904837	beta-catenin-TCF complex assembly	61	7	3.2	341	0.04003	0.01574
GO:0015833	peptide transport	424	28	22.26	1441	0.04065	0.12988
GO:0097028	dendritic cell differentiation	74	9	3.88	1986	0.0407	0.2024
GO:2000108	positive regulation of leukocyte apoptotic process	47	5	2.47	2280	0.04089	0.2435
GO:0050857	positive regulation of antigen receptor-mediated signaling pathway	30	4	1.57	149	0.0409	0.0038
GO:0006729	tetrahydrobiopterin biosynthetic process	15	3	0.79	891	0.04091	0.06566
GO:0046654	tetrahydrofolate biosynthetic process	15	3	0.79	211	0.04091	0.0076
GO:0030853	negative regulation of granulocyte differentiation	15	3	0.79	158	0.04091	0.00419
GO:0045414	regulation of interleukin-8 biosynthetic process	15	3	0.79	2633	0.04091	0.29442
GO:0010759	positive regulation of macrophage chemotaxis	15	3	0.79	396	0.04091	0.01972
GO:0034773	histone H4-K20 trimethylation	15	3	0.79	745	0.04091	0.05191
GO:0070301	cellular response to hydrogen peroxide	131	11	6.88	1177	0.04127	0.09889
GO:0060338	regulation of type I interferon-mediated signaling pathway	64	10	3.36	442	0.04183	0.02272
GO:0015758	glucose transport	266	16	13.96	4097	0.0429	0.54521
GO:0006302	double-strand break repair	343	19	18.01	2422	0.04354	0.26732
GO:0030155	regulation of cell adhesion	1134	75	59.53	351	0.04466	0.01672
GO:0003093	regulation of glomerular filtration	26	4	1.36	1978	0.04497	0.20076
GO:0035278	miRNA mediated inhibition of translation	26	4	1.36	3877	0.04497	0.50534
GO:0006349	regulation of gene expression by genetic imprinting	26	4	1.36	2620	0.04497	0.29363
GO:2000505	regulation of energy homeostasis	38	5	1.99	3570	0.04722	0.44581
GO:0031295	T cell costimulation	133	12	6.98	218	0.04733	0.00814
GO:0016064	immunoglobulin mediated immune response	172	22	9.03	2552	0.04752	0.28345
GO:0046777	protein autophosphorylation	403	31	21.16	37	0.04809	0.00036
GO:0071354	cellular response to interleukin-6	38	7	1.99	3257	0.0482	0.3957
GO:0002832	negative regulation of response to biotic stimulus	56	8	2.94	475	0.04827	0.02566
GO:0019953	sexual reproduction	1221	68	64.1	3337	0.04829	0.41033
GO:0046653	tetrahydrofolate metabolic process	33	6	1.73	681	0.04832	0.04499
GO:1901224	positive regulation of NIK/NF-kappaB signaling	49	6	2.57	555	0.04834	0.03369
GO:0045058	T cell selection	72	7	3.78	210	0.04839	0.0076
GO:0090336	positive regulation of brown fat cell differentiation	16	3	0.84	1706	0.04844	0.16205
GO:0001919	regulation of receptor recycling	42	4	2.2	242	0.04848	0.00945
GO:0042506	tyrosine phosphorylation of Stat5 protein	42	4	2.2	313	0.04848	0.01401
GO:0060977	coronary vasculature morphogenesis	26	3	1.36	401	0.04849	0.02015
GO:0035773	insulin secretion involved in cellular response to glucose stimulus	80	5	4.2	2299	0.04854	0.24695
GO:0010863	positive regulation of phospholipase C activity	57	4	2.99	967	0.04854	0.07349
GO:1990089	response to nerve growth factor	81	5	4.25	1533	0.04855	0.13923
GO:0043297	apical junction assembly	100	6	5.25	207	0.04857	0.00733
GO:0001754	eye photoreceptor cell differentiation	62	4	3.25	253	0.04857	0.0103
GO:0014031	mesenchymal cell development	131	6	6.88	291	0.04865	0.01254
GO:0009913	epidermal cell differentiation	291	14	15.28	2939	0.04867	0.34402
GO:0021675	nerve development	131	6	6.88	3434	0.04871	0.42459
GO:0043154	negative regulation of cysteine-type endopeptidase activity involved in apoptotic process	167	17	8.77	1970	0.04953	0.19961
GO:0007249	I-kappaB kinase/NF-kappaB signaling	475	46	24.94	57	0.04956	0.00083
GO:0061098	positive regulation of protein tyrosine kinase activity	69	8	3.62	106	0.04969	0.00232
GO:0006687	glycosphingolipid metabolic process	116	9	6.09	772	0.0499	0.05408
GO:2000637	positive regulation of gene silencing by miRNA	27	4	1.42	3039	0.05068	0.36245
GO:0070588	calcium ion transmembrane transport	440	40	23.1	3670	0.0514	0.46648
GO:0002429	immune response-activating cell surface receptor signaling pathway	539	54	28.3	1570	0.05156	0.14315
GO:0051338	regulation of transferase activity	1678	101	88.09	1599	0.05202	0.14688
GO:0070265	necrotic cell death	88	16	4.62	1502	0.05211	0.13654
GO:0002705	positive regulation of leukocyte mediated immunity	141	15	7.4	1609	0.05225	0.14762
GO:1905207	regulation of cardiocyte differentiation	57	7	2.99	1652	0.05238	0.15378
GO:0033003	regulation of mast cell activation	59	7	3.1	1625	0.05239	0.14972
GO:0010912	positive regulation of isomerase activity	15	3	0.79	1611	0.05245	0.14769
GO:0007440	foregut morphogenesis	17	3	0.89	1615	0.05245	0.14814
GO:0045357	regulation of interferon-beta biosynthetic process	11	2	0.58	1530	0.05248	0.13882
GO:0072683	T cell extravasation	11	2	0.58	1539	0.05248	0.13983
GO:0006991	response to sterol depletion	16	2	0.84	1543	0.05249	0.14049
GO:0010819	regulation of T cell chemotaxis	24	2	1.26	1526	0.0525	0.13854
GO:0045932	negative regulation of muscle contraction	36	2	1.89	1536	0.05253	0.13969
GO:0070304	positive regulation of stress-activated protein kinase signaling cascade	251	12	13.18	1541	0.05258	0.14048
GO:0072666	establishment of protein localization to vacuole	64	2	3.36	1687	0.05258	0.15888
GO:0009190	cyclic nucleotide biosynthetic process	238	9	12.49	1488	0.05266	0.13537
GO:0002221	pattern recognition receptor signaling pathway	278	35	14.59	1767	0.0548	0.17298
GO:0043409	negative regulation of MAPK cascade	271	29	14.23	3016	0.05535	0.3579
GO:0034138	toll-like receptor 3 signaling pathway	34	7	1.78	103	0.05629	0.00229
GO:0001961	positive regulation of cytokine-mediated signaling pathway	55	9	2.89	208	0.05643	0.00739
GO:0045589	regulation of regulatory T cell differentiation	28	5	1.47	961	0.05646	0.0728
GO:0036035	osteoclast development	35	4	1.84	394	0.05659	0.01954
GO:0007016	cytoskeletal anchoring at plasma membrane	17	3	0.89	3248	0.0566	0.39441
GO:1903608	protein localization to cytoplasmic stress granule	17	3	0.89	979	0.0566	0.07476
GO:0045056	transcytosis	17	3	0.89	839	0.0566	0.06063
GO:0032464	positive regulation of protein homooligomerization	17	3	0.89	1545	0.0566	0.14052
GO:0048386	positive regulation of retinoic acid receptor signaling pathway	17	3	0.89	3884	0.0566	0.50645
GO:0002281	macrophage activation involved in immune response	17	3	0.89	598	0.0566	0.03834
GO:0036010	protein localization to endosome	17	3	0.89	2594	0.0566	0.29009
GO:0010832	negative regulation of myotube differentiation	17	3	0.89	2474	0.0566	0.27306
GO:0050665	hydrogen peroxide biosynthetic process	17	3	0.89	2972	0.0566	0.35126
GO:0071499	cellular response to laminar fluid shear stress	17	3	0.89	2335	0.0566	0.25392
GO:0045820	negative regulation of glycolytic process	17	3	0.89	1716	0.0566	0.16382
GO:0034115	negative regulation of heterotypic cell-cell adhesion	17	3	0.89	453	0.0566	0.02335
GO:0042416	dopamine biosynthetic process	17	3	0.89	4118	0.0566	0.54866
GO:0045953	negative regulation of natural killer cell mediated cytotoxicity	17	3	0.89	417	0.0566	0.02154
GO:0042246	tissue regeneration	86	7	4.51	279	0.05677	0.01186
GO:0000731	DNA synthesis involved in DNA repair	145	9	7.61	1663	0.05763	0.15534
GO:0070098	chemokine-mediated signaling pathway	123	11	6.46	19	0.06046	6e-05
GO:0042542	response to hydrogen peroxide	226	20	11.86	580	0.06078	0.03622
GO:0051171	regulation of nitrogen compound metabolic process	7261	397	381.18	500	0.0609	0.02814
GO:2001240	negative regulation of extrinsic apoptotic signaling pathway in absence of ligand	67	7	3.52	185	0.06117	0.00553
GO:0050777	negative regulation of immune response	208	25	10.92	530	0.06168	0.03156
GO:0097190	apoptotic signaling pathway	1024	75	53.76	1754	0.06191	0.17077
GO:0051568	histone H3-K4 methylation	93	9	4.88	514	0.06191	0.02989
GO:0032816	positive regulation of natural killer cell activation	27	6	1.42	2042	0.06221	0.20898
GO:0006469	negative regulation of protein kinase activity	412	35	21.63	1248	0.06229	0.10771
GO:0009894	regulation of catabolic process	915	51	48.03	3866	0.06233	0.5031
GO:0051187	cofactor catabolic process	26	4	1.36	1747	0.06236	0.16961
GO:0019674	NAD metabolic process	111	8	5.83	3333	0.0624	0.40955
GO:0033127	regulation of histone phosphorylation	20	3	1.05	698	0.06242	0.04629
GO:0034143	regulation of toll-like receptor 4 signaling pathway	21	3	1.1	1057	0.06242	0.08264
GO:0045597	positive regulation of cell differentiation	1443	103	75.75	354	0.06288	0.01701
GO:0050892	intestinal absorption	47	5	2.47	4183	0.06321	0.56067
GO:0045141	meiotic telomere clustering	29	4	1.52	2647	0.06322	0.29639
GO:0006968	cellular defense response	110	10	5.77	14	0.0636	2.7e-05
GO:0050729	positive regulation of inflammatory response	184	17	9.66	281	0.06384	0.01197
GO:0001867	complement activation, lectin pathway	18	3	0.94	1006	0.06536	0.07751
GO:0042541	hemoglobin biosynthetic process	18	3	0.94	2118	0.06536	0.21959
GO:0018377	protein myristoylation	18	3	0.94	97	0.06536	0.00213
GO:0035726	common myeloid progenitor cell proliferation	18	3	0.94	2495	0.06536	0.27644
GO:1900118	negative regulation of execution phase of apoptosis	18	3	0.94	439	0.06536	0.02245
GO:0048311	mitochondrion distribution	18	3	0.94	3625	0.06536	0.45734
GO:0071360	cellular response to exogenous dsRNA	18	3	0.94	3234	0.06536	0.39092
GO:0071285	cellular response to lithium ion	18	3	0.94	198	0.06536	0.00651
GO:1903427	negative regulation of reactive oxygen species biosynthetic process	43	4	2.26	3662	0.06539	0.46465
GO:1900744	regulation of p38MAPK cascade	46	4	2.41	1458	0.06541	0.13162
GO:0045646	regulation of erythrocyte differentiation	61	4	3.2	3684	0.0655	0.46928
GO:0007623	circadian rhythm	331	17	17.38	2130	0.06664	0.22118
GO:0051260	protein homooligomerization	443	32	23.26	2012	0.06711	0.20581
GO:0030178	negative regulation of Wnt signaling pathway	329	22	17.27	2767	0.06716	0.31535
GO:0031954	positive regulation of protein autophosphorylation	42	5	2.2	1484	0.06758	0.13465
GO:0030212	hyaluronan metabolic process	67	6	3.52	85	0.06764	0.00176
GO:0038061	NIK/NF-kappaB signaling	210	18	11.02	4345	0.06992	0.58956
GO:0032727	positive regulation of interferon-alpha production	30	4	1.57	4049	0.07004	0.53559
GO:1903506	regulation of nucleic acid-templated transcription	5837	335	306.42	197	0.07047	0.00633
GO:0045444	fat cell differentiation	344	30	18.06	375	0.07129	0.01839
GO:0045471	response to ethanol	213	16	11.18	4856	0.07195	0.67831
GO:0048041	focal adhesion assembly	127	13	6.67	2534	0.0727	0.28099
GO:0010648	negative regulation of cell communication	2005	141	105.26	1448	0.07402	0.13075
GO:0045670	regulation of osteoclast differentiation	111	10	5.83	923	0.07442	0.0688
GO:0044241	lipid digestion	37	4	1.94	3931	0.07469	0.51506
GO:0061469	regulation of type B pancreatic cell proliferation	19	3	1	4355	0.07469	0.59074
GO:0007379	segment specification	19	3	1	1513	0.07469	0.13772
GO:2000109	regulation of macrophage apoptotic process	19	3	1	355	0.07469	0.01716
GO:0021932	hindbrain radial glia guided cell migration	19	3	1	1414	0.07469	0.12749
GO:0009820	alkaloid metabolic process	19	3	1	2708	0.07469	0.30592
GO:0042118	endothelial cell activation	19	3	1	3546	0.07469	0.44211
GO:0019885	antigen processing and presentation of endogenous peptide antigen via MHC class I	19	3	1	257	0.07469	0.01054
GO:0014070	response to organic cyclic compound	1498	110	78.64	1456	0.07565	0.13154
GO:0051098	regulation of binding	537	45	28.19	1893	0.07606	0.19052
GO:0006898	receptor-mediated endocytosis	444	34	23.31	213	0.07643	0.0079
GO:0019932	second-messenger-mediated signaling	388	27	20.37	1954	0.07706	0.19797
GO:0032680	regulation of tumor necrosis factor production	182	16	9.55	1872	0.07708	0.18765
GO:0006925	inflammatory cell apoptotic process	32	7	1.68	2150	0.07719	0.22465
GO:1903337	positive regulation of vacuolar transport	20	5	1.05	3041	0.07732	0.3626
GO:0009396	folic acid-containing compound biosynthetic process	24	5	1.26	2192	0.07734	0.23041
GO:0060740	prostate gland epithelium morphogenesis	37	5	1.94	916	0.07741	0.06843
GO:1901020	negative regulation of calcium ion transmembrane transporter activity	40	5	2.1	3690	0.07742	0.46984
GO:0006475	internal protein amino acid acetylation	256	16	13.44	3498	0.07746	0.43585
GO:0045601	regulation of endothelial cell differentiation	39	4	2.05	3095	0.07752	0.36956
GO:0051023	regulation of immunoglobulin secretion	24	3	1.26	245	0.07754	0.00975
GO:1901889	negative regulation of cell junction assembly	33	3	1.73	40	0.07758	0.00039
GO:0055007	cardiac muscle cell differentiation	175	12	9.19	4231	0.07931	0.56781
GO:0038096	Fc-gamma receptor signaling pathway involved in phagocytosis	145	12	7.61	59	0.07979	0.00097
GO:0042493	response to drug	708	50	37.17	1103	0.08181	0.08742
GO:0008360	regulation of cell shape	256	19	13.44	76	0.08206	0.00149
GO:0071377	cellular response to glucagon stimulus	58	6	3.04	165	0.08277	0.00451
GO:0016311	dephosphorylation	759	48	39.84	4076	0.08281	0.54163
GO:0050870	positive regulation of T cell activation	365	28	19.16	2213	0.08364	0.23264
GO:0030449	regulation of complement activation	45	8	2.36	2084	0.0842	0.21594
GO:0002891	positive regulation of immunoglobulin mediated immune response	48	7	2.52	282	0.08423	0.01211
GO:0050427	3'-phosphoadenosine 5'-phosphosulfate metabolic process	30	4	1.57	4845	0.08451	0.67523
GO:0043301	negative regulation of leukocyte degranulation	30	4	1.57	649	0.08451	0.04245
GO:0003339	regulation of mesenchymal to epithelial transition involved in metanephros morphogenesis	20	3	1.05	806	0.08458	0.05736
GO:0090005	negative regulation of establishment of protein localization to plasma membrane	20	3	1.05	1887	0.08458	0.18987
GO:0090331	negative regulation of platelet aggregation	20	3	1.05	4746	0.08458	0.65672
GO:0042448	progesterone metabolic process	20	3	1.05	3658	0.08458	0.46397
GO:0043923	positive regulation by host of viral transcription	20	3	1.05	668	0.08458	0.04406
GO:1904707	positive regulation of vascular smooth muscle cell proliferation	20	3	1.05	126	0.08458	0.00314
GO:0048844	artery morphogenesis	102	8	5.35	367	0.08471	0.01767
GO:0051642	centrosome localization	32	4	1.68	1161	0.08477	0.09662
GO:0043011	myeloid dendritic cell differentiation	32	4	1.68	1478	0.08477	0.13437
GO:0009880	embryonic pattern specification	91	7	4.78	4375	0.08478	0.594
GO:0022406	membrane docking	121	6	6.35	843	0.08491	0.06098
GO:1901655	cellular response to ketone	123	10	6.46	49	0.0854	0.00059
GO:0031146	SCF-dependent proteasomal ubiquitin-dependent protein catabolic process	45	5	2.36	4339	0.08558	0.58892
GO:0060079	excitatory postsynaptic potential	110	8	5.77	4133	0.08567	0.5531
GO:0030177	positive regulation of Wnt signaling pathway	274	16	14.38	3025	0.08579	0.35958
GO:0007568	aging	496	31	26.04	361	0.08672	0.01734
GO:0006879	cellular iron ion homeostasis	81	11	4.25	4981	0.08739	0.70097
GO:0045665	negative regulation of neuron differentiation	302	14	15.85	444	0.08929	0.02297
GO:0032092	positive regulation of protein binding	142	12	7.45	738	0.09154	0.05097
GO:0045987	positive regulation of smooth muscle contraction	46	5	2.41	1064	0.09209	0.08345
GO:0003016	respiratory system process	51	6	2.68	3891	0.09245	0.50762
GO:0014850	response to muscle activity	33	4	1.73	1465	0.09265	0.13266
GO:0061154	endothelial tube morphogenesis	33	4	1.73	1392	0.09265	0.12495
GO:0050718	positive regulation of interleukin-1 beta secretion	33	4	1.73	951	0.09265	0.07189
GO:0090136	epithelial cell-cell adhesion	33	4	1.73	3204	0.09265	0.38554
GO:0019221	cytokine-mediated signaling pathway	935	125	49.08	565	0.09266	0.03429
GO:0043407	negative regulation of MAP kinase activity	131	14	6.88	583	0.09293	0.03674
GO:0032735	positive regulation of interleukin-12 production	74	7	3.88	3081	0.09309	0.3689
GO:0002431	Fc receptor mediated stimulatory signaling pathway	155	14	8.14	707	0.09316	0.04715
GO:0007399	nervous system development	3619	201	189.99	1181	0.09329	0.10004
GO:0008154	actin polymerization or depolymerization	317	20	16.64	1070	0.09345	0.08386
GO:1904018	positive regulation of vasculature development	233	15	12.23	605	0.09352	0.03887
GO:0043268	positive regulation of potassium ion transport	52	5	2.73	3608	0.09358	0.45355
GO:0045623	negative regulation of T-helper cell differentiation	20	3	1.05	988	0.09361	0.07626
GO:0001866	NK T cell proliferation	10	2	0.52	36	0.09367	0.00029
GO:0014883	transition between fast and slow fiber	10	2	0.52	1290	0.09367	0.11215
GO:0060685	regulation of prostatic bud formation	10	2	0.52	3796	0.09367	0.48895
GO:0038161	prolactin signaling pathway	10	2	0.52	889	0.09367	0.06555
GO:0003186	tricuspid valve morphogenesis	10	2	0.52	1520	0.09367	0.1383
GO:0060956	endocardial cell differentiation	10	2	0.52	2567	0.09367	0.28601
GO:0044854	plasma membrane raft assembly	10	2	0.52	3491	0.09367	0.43469
GO:0072318	clathrin coat disassembly	10	2	0.52	693	0.09367	0.04587
GO:1900107	regulation of nodal signaling pathway	10	2	0.52	904	0.09367	0.06664
GO:0002371	dendritic cell cytokine production	10	2	0.52	3090	0.09367	0.36937
GO:0048304	positive regulation of isotype switching to IgG isotypes	10	2	0.52	682	0.09367	0.04503
GO:0021869	forebrain ventricular zone progenitor cell division	10	2	0.52	1760	0.09367	0.17191
GO:2000427	positive regulation of apoptotic cell clearance	10	2	0.52	1514	0.09367	0.13785
GO:0048293	regulation of isotype switching to IgE isotypes	10	2	0.52	1818	0.09367	0.17962
GO:0007221	positive regulation of transcription of Notch receptor target	10	2	0.52	315	0.09367	0.01404
GO:0002865	negative regulation of acute inflammatory response to antigenic stimulus	10	2	0.52	387	0.09367	0.01901
GO:0071321	cellular response to cGMP	10	2	0.52	2218	0.09367	0.23404
GO:0071315	cellular response to morphine	10	2	0.52	2881	0.09367	0.33178
GO:0048865	stem cell fate commitment	10	2	0.52	4522	0.09367	0.61845
GO:0007598	blood coagulation, extrinsic pathway	10	2	0.52	2920	0.09367	0.34143
GO:0010626	negative regulation of Schwann cell proliferation	10	2	0.52	1596	0.09367	0.14611
GO:0097049	motor neuron apoptotic process	10	2	0.52	645	0.09367	0.0423
GO:0042447	hormone catabolic process	10	2	0.52	2615	0.09367	0.29298
GO:1904884	positive regulation of telomerase catalytic core complex assembly	10	2	0.52	1387	0.09367	0.12464
GO:0019563	glycerol catabolic process	10	2	0.52	3818	0.09367	0.49361
GO:2000379	positive regulation of reactive oxygen species metabolic process	142	11	7.45	4326	0.09379	0.58626
GO:0045840	positive regulation of mitotic nuclear division	72	7	3.78	3616	0.09387	0.45534
GO:0009395	phospholipid catabolic process	48	8	2.52	3612	0.09444	0.45412
GO:1901841	regulation of high voltage-gated calcium channel activity	21	3	1.1	403	0.09499	0.0202
GO:2001223	negative regulation of neuron migration	21	3	1.1	134	0.09499	0.00339
GO:0033210	leptin-mediated signaling pathway	21	3	1.1	4041	0.09499	0.53452
GO:0003214	cardiac left ventricle morphogenesis	21	3	1.1	3295	0.09499	0.40197
GO:1900116	extracellular negative regulation of signal transduction	21	3	1.1	1868	0.09499	0.18745
GO:0050884	neuromuscular process controlling posture	21	3	1.1	2132	0.09499	0.22229
GO:0048845	venous blood vessel morphogenesis	21	3	1.1	1641	0.09499	0.15212
GO:0045630	positive regulation of T-helper 2 cell differentiation	21	3	1.1	1601	0.09499	0.147
GO:0030279	negative regulation of ossification	107	7	5.62	2395	0.09507	0.26303
GO:0009117	nucleotide metabolic process	1073	43	56.33	2943	0.09543	0.34471
GO:0002252	immune effector process	1148	147	60.27	1481	0.09591	0.13462
GO:0009755	hormone-mediated signaling pathway	388	32	20.37	221	0.09678	0.00828
GO:0043277	apoptotic cell clearance	69	8	3.62	2258	0.09843	0.24006
GO:0021591	ventricular system development	63	6	3.31	1969	0.09881	0.19943
GO:0045671	negative regulation of osteoclast differentiation	47	5	2.47	62	0.09884	0.00104
GO:0043627	response to estrogen	127	12	6.67	1149	0.0999	0.09524
GO:0002758	innate immune response-activating signal transduction	421	50	22.1	1129	0.10031	0.09295
GO:0051353	positive regulation of oxidoreductase activity	80	8	4.2	2300	0.10055	0.24698
GO:0030857	negative regulation of epithelial cell differentiation	54	6	2.83	4222	0.10068	0.56623
GO:0042036	negative regulation of cytokine biosynthetic process	44	5	2.31	1606	0.10077	0.14743
GO:0022011	myelination in peripheral nervous system	44	5	2.31	411	0.10077	0.02118
GO:0070584	mitochondrion morphogenesis	34	4	1.78	674	0.10086	0.04438
GO:0003013	circulatory system process	902	64	47.35	3130	0.10109	0.37519
GO:0032943	mononuclear cell proliferation	428	35	22.47	909	0.10141	0.06714
GO:2000116	regulation of cysteine-type endopeptidase activity	410	31	21.52	620	0.10163	0.04048
GO:0002220	innate immune response activating cell surface receptor signaling pathway	193	19	10.13	626	0.10167	0.04116
GO:0071900	regulation of protein serine/threonine kinase activity	819	51	42.99	1127	0.10172	0.09256
GO:0006022	aminoglycan metabolic process	272	20	14.28	3307	0.1019	0.40491
GO:0003012	muscle system process	707	41	37.12	3327	0.10202	0.40819
GO:1903671	negative regulation of sprouting angiogenesis	23	5	1.21	3542	0.10203	0.44175
GO:1905314	semi-lunar valve development	28	4	1.47	560	0.10212	0.03392
GO:0071402	cellular response to lipoprotein particle stimulus	20	3	1.05	3168	0.10216	0.3801
GO:0010878	cholesterol storage	28	3	1.47	3567	0.10219	0.44486
GO:1902338	negative regulation of apoptotic process involved in morphogenesis	12	2	0.63	1463	0.10221	0.13257
GO:0070487	monocyte aggregation	13	2	0.68	810	0.10221	0.05755
GO:0050942	positive regulation of pigment cell differentiation	15	2	0.79	511	0.10222	0.02969
GO:0007135	meiosis II	20	2	1.05	931	0.10224	0.07002
GO:0046456	icosanoid biosynthetic process	61	4	3.2	3382	0.10225	0.41784
GO:1902667	regulation of axon guidance	65	4	3.41	981	0.10226	0.07521
GO:0005996	monosaccharide metabolic process	446	24	23.41	3309	0.10226	0.4051
GO:0044264	cellular polysaccharide metabolic process	162	8	8.5	3311	0.10234	0.40527
GO:0018208	peptidyl-proline modification	97	3	5.09	3427	0.10245	0.42311
GO:0045103	intermediate filament-based process	87	2	4.57	581	0.10248	0.03623
GO:1903747	regulation of establishment of protein localization to mitochondrion	232	6	12.18	1134	0.10274	0.09328
GO:0006887	exocytosis	652	42	34.23	2923	0.1036	0.34181
GO:0002224	toll-like receptor signaling pathway	217	24	11.39	2564	0.10406	0.28531
GO:2000241	regulation of reproductive process	170	16	8.92	1204	0.105	0.1018
GO:0045892	negative regulation of transcription, DNA-templated	1881	125	98.75	1082	0.10539	0.08577
GO:0060259	regulation of feeding behavior	32	4	1.68	4144	0.10581	0.55512
GO:0032288	myelin assembly	33	4	1.73	2513	0.10582	0.27927
GO:0032434	regulation of proteasomal ubiquitin-dependent protein catabolic process	210	13	11.02	727	0.10587	0.04952
GO:0060766	negative regulation of androgen receptor signaling pathway	22	3	1.15	2358	0.10589	0.25765
GO:0003184	pulmonary valve morphogenesis	22	3	1.15	2996	0.10589	0.35491
GO:0072217	negative regulation of metanephros development	22	3	1.15	2525	0.10589	0.28031
GO:0010310	regulation of hydrogen peroxide metabolic process	22	3	1.15	4108	0.10589	0.54688
GO:0071391	cellular response to estrogen stimulus	22	3	1.15	2289	0.10589	0.2444
GO:0045724	positive regulation of cilium assembly	22	3	1.15	2120	0.10589	0.21963
GO:0060312	regulation of blood vessel remodeling	22	3	1.15	3143	0.10589	0.37696
GO:0046718	viral entry into host cell	190	19	9.97	2206	0.10627	0.23168
GO:0070979	protein K11-linked ubiquitination	77	7	4.04	4989	0.10915	0.70298
GO:0008334	histone mRNA metabolic process	52	6	2.73	4269	0.10917	0.57511
GO:0042531	positive regulation of tyrosine phosphorylation of STAT protein	96	17	5.04	2570	0.10923	0.28608
GO:0014823	response to activity	125	12	6.56	2319	0.10936	0.25083
GO:0031581	hemidesmosome assembly	35	4	1.84	673	0.1094	0.04435
GO:0030206	chondroitin sulfate biosynthetic process	35	4	1.84	647	0.1094	0.04242
GO:0007413	axonal fasciculation	35	4	1.84	3201	0.1094	0.3851
GO:0051000	positive regulation of nitric-oxide synthase activity	35	4	1.84	321	0.1094	0.01422
GO:0060402	calcium ion transport into cytosol	222	18	11.65	2489	0.10997	0.27534
GO:0042510	regulation of tyrosine phosphorylation of Stat1 protein	31	8	1.63	2934	0.10997	0.34365
GO:0050663	cytokine secretion	299	22	15.7	378	0.10998	0.01849
GO:0042093	T-helper cell differentiation	101	9	5.3	1035	0.11033	0.0801
GO:0060253	negative regulation of glial cell proliferation	21	4	1.1	1775	0.11043	0.17373
GO:0008064	regulation of actin polymerization or depolymerization	275	17	14.44	724	0.11048	0.04906
GO:0033005	positive regulation of mast cell activation	33	4	1.73	526	0.11052	0.03137
GO:0045954	positive regulation of natural killer cell mediated cytotoxicity	26	3	1.36	326	0.1106	0.01458
GO:1903071	positive regulation of ER-associated ubiquitin-dependent protein catabolic process	11	2	0.58	3935	0.11063	0.51619
GO:0060236	regulation of mitotic spindle organization	11	2	0.58	3859	0.11063	0.50199
GO:0001821	histamine secretion	11	2	0.58	3984	0.11063	0.52468
GO:1900017	positive regulation of cytokine production involved in inflammatory response	11	2	0.58	1889	0.11063	0.1899
GO:0030382	sperm mitochondrion organization	11	2	0.58	2041	0.11063	0.20841
GO:0033668	negative regulation by symbiont of host apoptotic process	11	2	0.58	4903	0.11063	0.6859
GO:0035507	regulation of myosin-light-chain-phosphatase activity	11	2	0.58	476	0.11063	0.02574
GO:0000436	carbon catabolite activation of transcription from RNA polymerase II promoter	11	2	0.58	264	0.11063	0.01082
GO:0015886	heme transport	11	2	0.58	2330	0.11063	0.25278
GO:0032898	neurotrophin production	11	2	0.58	1014	0.11063	0.07848
GO:0048170	positive regulation of long-term neuronal synaptic plasticity	11	2	0.58	1785	0.11063	0.17438
GO:0032819	positive regulation of natural killer cell proliferation	11	2	0.58	400	0.11063	0.02008
GO:0032596	protein transport into membrane raft	11	2	0.58	2969	0.11063	0.35033
GO:0007207	phospholipase C-activating G-protein coupled acetylcholine receptor signaling pathway	11	2	0.58	4608	0.11063	0.63519
GO:0010886	positive regulation of cholesterol storage	11	2	0.58	3841	0.11063	0.49864
GO:0034398	telomere tethering at nuclear periphery	11	2	0.58	3266	0.11063	0.39774
GO:0002585	positive regulation of antigen processing and presentation of peptide antigen	11	2	0.58	41	0.11063	0.0004
GO:0002589	regulation of antigen processing and presentation of peptide antigen via MHC class I	11	2	0.58	308	0.11063	0.01365
GO:0060050	positive regulation of protein glycosylation	11	2	0.58	2547	0.11063	0.28275
GO:0002666	positive regulation of T cell tolerance induction	11	2	0.58	1674	0.11063	0.15687
GO:1904354	negative regulation of telomere capping	11	2	0.58	803	0.11063	0.05715
GO:0045591	positive regulation of regulatory T cell differentiation	11	2	0.58	1337	0.11063	0.11754
GO:0048619	embryonic hindgut morphogenesis	11	2	0.58	3692	0.11063	0.4701
GO:2000628	regulation of miRNA metabolic process	11	2	0.58	55	0.11063	0.0008
GO:0071763	nuclear membrane organization	11	2	0.58	2435	0.11063	0.26855
GO:0045607	regulation of auditory receptor cell differentiation	11	2	0.58	4262	0.11063	0.57345
GO:1901256	regulation of macrophage colony-stimulating factor production	11	2	0.58	1610	0.11063	0.14764
GO:0071557	histone H3-K27 demethylation	11	2	0.58	1439	0.11063	0.1296
GO:0001710	mesodermal cell fate commitment	34	3	1.78	4229	0.11066	0.56741
GO:0030301	cholesterol transport	113	7	5.93	3403	0.11068	0.41987
GO:0051168	nuclear export	338	17	17.74	2770	0.11092	0.31578
GO:0040008	regulation of growth	1090	57	57.22	4420	0.11094	0.60246
GO:0043603	cellular amide metabolic process	1940	76	101.84	3623	0.11101	0.45688
GO:0001937	negative regulation of endothelial cell proliferation	49	5	2.57	1497	0.11306	0.13588
GO:0000165	MAPK cascade	1500	100	78.74	3306	0.11318	0.40444
GO:0032869	cellular response to insulin stimulus	340	29	17.85	115	0.11627	0.0027
GO:0035307	positive regulation of protein dephosphorylation	44	5	2.31	2396	0.11709	0.26303
GO:0042535	positive regulation of tumor necrosis factor biosynthetic process	23	3	1.21	534	0.11726	0.03182
GO:0075522	IRES-dependent viral translational initiation	23	3	1.21	3071	0.11726	0.36759
GO:0035589	G-protein coupled purinergic nucleotide receptor signaling pathway	23	3	1.21	2484	0.11726	0.27492
GO:2000369	regulation of clathrin-dependent endocytosis	23	3	1.21	3332	0.11726	0.40933
GO:0010804	negative regulation of tumor necrosis factor-mediated signaling pathway	23	3	1.21	1094	0.11726	0.08676
GO:0031572	G2 DNA damage checkpoint	66	6	3.46	3405	0.11815	0.4203
GO:0006465	signal peptide processing	36	4	1.89	587	0.11825	0.03734
GO:0048010	vascular endothelial growth factor receptor signaling pathway	186	14	9.76	234	0.1185	0.00908
GO:0043066	negative regulation of apoptotic process	1472	108	77.27	895	0.11876	0.06597
GO:0042742	defense response to bacterium	314	19	16.48	312	0.11922	0.01392
GO:0045815	positive regulation of gene expression, epigenetic	110	9	5.77	3763	0.12049	0.48232
GO:0042755	eating behavior	50	5	2.62	4466	0.12052	0.60954
GO:0000226	microtubule cytoskeleton organization	725	41	38.06	2874	0.12058	0.33021
GO:0009409	response to cold	79	7	4.15	2238	0.12062	0.23686
GO:0045165	cell fate commitment	409	22	21.47	3957	0.12145	0.51986
GO:0018105	peptidyl-serine phosphorylation	455	23	23.89	129	0.12178	0.0032
GO:0098609	cell-cell adhesion	2187	135	114.81	5272	0.12209	0.75494
GO:0038095	Fc-epsilon receptor signaling pathway	238	17	12.49	2838	0.12333	0.32529
GO:0008286	insulin receptor signaling pathway	206	19	10.81	1239	0.12435	0.10628
GO:0043491	protein kinase B signaling	244	16	12.81	2921	0.12712	0.34161
GO:0045446	endothelial cell differentiation	147	16	7.72	1143	0.12726	0.09424
GO:0002063	chondrocyte development	37	4	1.94	3666	0.1274	0.46566
GO:0045736	negative regulation of cyclin-dependent protein serine/threonine kinase activity	37	4	1.94	4121	0.1274	0.54939
GO:0097352	autophagosome maturation	37	4	1.94	1729	0.1274	0.16688
GO:0032873	negative regulation of stress-activated MAPK cascade	75	9	3.94	821	0.12775	0.05904
GO:1903670	regulation of sprouting angiogenesis	54	7	2.83	1195	0.12789	0.10082
GO:0016192	vesicle-mediated transport	2285	145	119.95	2727	0.12791	0.30893
GO:0010544	negative regulation of platelet activation	32	5	1.68	2686	0.12801	0.30298
GO:0030166	proteoglycan biosynthetic process	89	7	4.67	2308	0.12816	0.24908
GO:0046822	regulation of nucleocytoplasmic transport	370	21	19.42	2915	0.12828	0.3391
GO:1903578	regulation of ATP metabolic process	88	6	4.62	2202	0.12831	0.23126
GO:0014745	negative regulation of muscle adaptation	12	2	0.63	4007	0.12831	0.52863
GO:0001553	luteinization	12	2	0.63	2261	0.12831	0.24049
GO:0051890	regulation of cardioblast differentiation	12	2	0.63	4159	0.12831	0.55699
GO:0072008	glomerular mesangial cell differentiation	12	2	0.63	2549	0.12831	0.28325
GO:0060947	cardiac vascular smooth muscle cell differentiation	12	2	0.63	2802	0.12831	0.32004
GO:0008228	opsonization	12	2	0.63	614	0.12831	0.03996
GO:0044829	positive regulation by host of viral genome replication	12	2	0.63	1939	0.12831	0.1965
GO:0070257	positive regulation of mucus secretion	12	2	0.63	4888	0.12831	0.6843
GO:1900246	positive regulation of RIG-I signaling pathway	12	2	0.63	95	0.12831	0.00202
GO:0070508	cholesterol import	12	2	0.63	3139	0.12831	0.37602
GO:0015810	aspartate transport	12	2	0.63	2983	0.12831	0.35242
GO:0050847	progesterone receptor signaling pathway	12	2	0.63	4698	0.12831	0.64874
GO:0006072	glycerol-3-phosphate metabolic process	12	2	0.63	314	0.12831	0.01402
GO:0002677	negative regulation of chronic inflammatory response	12	2	0.63	824	0.12831	0.05932
GO:1901387	positive regulation of voltage-gated calcium channel activity	12	2	0.63	1525	0.12831	0.13852
GO:0043950	positive regulation of cAMP-mediated signaling	12	2	0.63	1554	0.12831	0.14134
GO:0060161	positive regulation of dopamine receptor signaling pathway	12	2	0.63	1294	0.12831	0.11268
GO:0060179	male mating behavior	12	2	0.63	1973	0.12831	0.19995
GO:0010659	cardiac muscle cell apoptotic process	53	4	2.78	1597	0.12833	0.14633
GO:0048103	somatic stem cell division	34	3	1.78	4457	0.12833	0.60873
GO:0048016	inositol phosphate-mediated signaling	56	4	2.94	3486	0.12835	0.43335
GO:0032233	positive regulation of actin filament bundle assembly	78	5	4.09	2055	0.12838	0.21116
GO:0097009	energy homeostasis	62	8	3.25	2759	0.12845	0.31445
GO:0045022	early endosome to late endosome transport	48	7	2.52	139	0.1285	0.00351
GO:0090276	regulation of peptide hormone secretion	325	16	17.06	3979	0.12868	0.52358
GO:0051893	regulation of focal adhesion assembly	84	8	4.41	869	0.12868	0.06361
GO:0002009	morphogenesis of an epithelium	880	49	46.2	4090	0.12883	0.54442
GO:0003197	endocardial cushion development	69	6	3.62	4289	0.12892	0.57862
GO:0003188	heart valve formation	24	3	1.26	4441	0.12905	0.60583
GO:0007252	I-kappaB phosphorylation	24	3	1.26	1675	0.12905	0.15687
GO:0071481	cellular response to X-ray	24	3	1.26	1209	0.12905	0.10218
GO:0006474	N-terminal protein amino acid acetylation	24	3	1.26	1742	0.12905	0.16884
GO:0051403	stress-activated MAPK cascade	452	24	23.73	3554	0.12935	0.44313
GO:0006260	DNA replication	540	36	28.35	3179	0.13012	0.38194
GO:0050766	positive regulation of phagocytosis	76	8	3.99	360	0.13158	0.01726
GO:0032467	positive regulation of cytokinesis	66	6	3.46	4580	0.13205	0.62931
GO:0043010	camera-type eye development	486	26	25.51	531	0.13348	0.0316
GO:0001843	neural tube closure	157	11	8.24	4363	0.13619	0.59172
GO:0007229	integrin-mediated signaling pathway	160	12	8.4	31	0.13639	0.00023
GO:0042254	ribosome biogenesis	862	19	45.25	4353	0.1365	0.59038
GO:0051894	positive regulation of focal adhesion assembly	38	4	1.99	388	0.13683	0.01913
GO:0090026	positive regulation of monocyte chemotaxis	38	4	1.99	1977	0.13683	0.20065
GO:0060445	branching involved in salivary gland morphogenesis	38	4	1.99	930	0.13683	0.06993
GO:0030073	insulin secretion	318	17	16.69	1982	0.13727	0.20161
GO:0030198	extracellular matrix organization	556	31	29.19	1627	0.13765	0.15012
GO:0034333	adherens junction assembly	152	16	7.98	554	0.13987	0.03368
GO:0031667	response to nutrient levels	657	50	34.49	3529	0.1401	0.44025
GO:0010646	regulation of cell communication	5051	336	265.16	3365	0.14072	0.41565
GO:0014003	oligodendrocyte development	44	4	2.31	4116	0.14124	0.54859
GO:0051923	sulfation	25	3	1.31	3149	0.14124	0.37743
GO:0032717	negative regulation of interleukin-8 production	25	3	1.31	3299	0.14124	0.40257
GO:0031054	pre-miRNA processing	25	3	1.31	1281	0.14124	0.1105
GO:0045579	positive regulation of B cell differentiation	25	3	1.31	1403	0.14124	0.12639
GO:0044270	cellular nitrogen compound catabolic process	1051	40	55.17	3232	0.14142	0.39045
GO:0017148	negative regulation of translation	275	20	14.44	3331	0.14184	0.40926
GO:0045860	positive regulation of protein kinase activity	814	47	42.73	96	0.14357	0.00203
GO:0050880	regulation of blood vessel size	220	23	11.55	2066	0.14487	0.21343
GO:0006695	cholesterol biosynthetic process	83	7	4.36	305	0.14531	0.01356
GO:0032268	regulation of cellular protein metabolic process	4055	241	212.87	3261	0.14615	0.39598
GO:0060008	Sertoli cell differentiation	44	6	2.31	523	0.14618	0.03106
GO:0043576	regulation of respiratory gaseous exchange	31	4	1.63	804	0.1464	0.0572
GO:0000209	protein polyubiquitination	484	39	25.41	776	0.14643	0.05423
GO:0030510	regulation of BMP signaling pathway	119	8	6.25	1888	0.14651	0.1899
GO:0042921	glucocorticoid receptor signaling pathway	26	3	1.36	408	0.14653	0.02109
GO:0032757	positive regulation of interleukin-8 production	58	5	3.04	4328	0.14653	0.58646
GO:0097284	hepatocyte apoptotic process	39	4	2.05	4780	0.14654	0.66178
GO:0010460	positive regulation of heart rate	39	4	2.05	919	0.14654	0.06855
GO:0001778	plasma membrane repair	13	2	0.68	4004	0.14658	0.52856
GO:0045906	negative regulation of vasoconstriction	13	2	0.68	2215	0.14658	0.23311
GO:0042518	negative regulation of tyrosine phosphorylation of Stat3 protein	13	2	0.68	2860	0.14658	0.32866
GO:0089711	L-glutamate transmembrane transport	13	2	0.68	3770	0.14658	0.48313
GO:0003374	dynamin family protein polymerization involved in mitochondrial fission	13	2	0.68	619	0.14658	0.04048
GO:0003344	pericardium morphogenesis	13	2	0.68	4533	0.14658	0.62069
GO:0060631	regulation of meiosis I	13	2	0.68	3194	0.14658	0.38448
GO:0033132	negative regulation of glucokinase activity	13	2	0.68	524	0.14658	0.03129
GO:0016559	peroxisome fission	13	2	0.68	4731	0.14658	0.65474
GO:0061356	regulation of Wnt protein secretion	13	2	0.68	3803	0.14658	0.49002
GO:0035754	B cell chemotaxis	13	2	0.68	1099	0.14658	0.08704
GO:0033689	negative regulation of osteoblast proliferation	13	2	0.68	427	0.14658	0.0219
GO:0007028	cytoplasm organization	13	2	0.68	80	0.14658	0.00159
GO:0035520	monoubiquitinated protein deubiquitination	13	2	0.68	1069	0.14658	0.08374
GO:0045080	positive regulation of chemokine biosynthetic process	13	2	0.68	2106	0.14658	0.21869
GO:0002315	marginal zone B cell differentiation	13	2	0.68	178	0.14658	0.00527
GO:0021894	cerebral cortex GABAergic interneuron development	13	2	0.68	2975	0.14658	0.35142
GO:1902774	late endosome to lysosome transport	13	2	0.68	2110	0.14658	0.2189
GO:0002826	negative regulation of T-helper 1 type immune response	13	2	0.68	1915	0.14658	0.19319
GO:0048702	embryonic neurocranium morphogenesis	13	2	0.68	2214	0.14658	0.23311
GO:0071376	cellular response to corticotropin-releasing hormone stimulus	13	2	0.68	2471	0.14658	0.27276
GO:0002551	mast cell chemotaxis	13	2	0.68	784	0.14658	0.05487
GO:0017187	peptidyl-glutamic acid carboxylation	13	2	0.68	977	0.14658	0.07471
GO:0002679	respiratory burst involved in defense response	13	2	0.68	4474	0.14658	0.61077
GO:2000675	negative regulation of type B pancreatic cell apoptotic process	13	2	0.68	517	0.14658	0.03059
GO:0071803	positive regulation of podosome assembly	13	2	0.68	3325	0.14658	0.40789
GO:0071550	death-inducing signaling complex assembly	13	2	0.68	1849	0.14658	0.18523
GO:0051151	negative regulation of smooth muscle cell differentiation	13	2	0.68	1350	0.14658	0.11914
GO:0060242	contact inhibition	13	2	0.68	3114	0.14658	0.37245
GO:0048640	negative regulation of developmental growth	133	8	6.98	2518	0.14663	0.27987
GO:0010574	regulation of vascular endothelial growth factor production	66	4	3.46	1932	0.14671	0.19594
GO:0006415	translational termination	155	4	8.14	4809	0.1475	0.66831
GO:0043500	muscle adaptation	150	17	7.87	2033	0.14854	0.20783
GO:1904036	negative regulation of epithelial cell apoptotic process	66	11	3.46	2032	0.1487	0.20783
GO:0001704	formation of primary germ layer	206	18	10.81	1993	0.14873	0.20326
GO:0060669	embryonic placenta morphogenesis	36	7	1.89	2493	0.14894	0.2762
GO:1901019	regulation of calcium ion transmembrane transporter activity	132	12	6.93	4520	0.14895	0.618
GO:0010810	regulation of cell-substrate adhesion	351	23	18.43	522	0.14899	0.031
GO:0034694	response to prostaglandin	50	7	2.62	599	0.14902	0.03835
GO:0002448	mast cell mediated immunity	81	8	4.25	1772	0.14908	0.17355
GO:0014044	Schwann cell development	47	6	2.47	3977	0.1491	0.52273
GO:0045911	positive regulation of DNA recombination	31	5	1.63	1049	0.14912	0.08166
GO:0000768	syncytium formation by plasma membrane fusion	73	7	3.83	4024	0.14914	0.53167
GO:0072160	nephron tubule epithelial cell differentiation	26	4	1.36	1260	0.14919	0.10917
GO:0097061	dendritic spine organization	89	7	4.67	3285	0.14922	0.40118
GO:0046851	negative regulation of bone remodeling	21	3	1.1	4449	0.14927	0.60717
GO:0032649	regulation of interferon-gamma production	157	10	8.24	577	0.14928	0.0359
GO:0060420	regulation of heart growth	81	6	4.25	1372	0.14928	0.12289
GO:0046530	photoreceptor cell differentiation	82	6	4.3	349	0.14929	0.01636
GO:2000739	regulation of mesenchymal stem cell differentiation	14	2	0.73	1360	0.14933	0.12075
GO:0065005	protein-lipid complex assembly	34	3	1.78	746	0.14933	0.05193
GO:1902884	positive regulation of response to oxidative stress	34	3	1.78	1531	0.14933	0.13915
GO:0044065	regulation of respiratory system process	18	2	0.94	4521	0.14935	0.61818
GO:1902170	cellular response to reactive nitrogen species	26	2	1.36	3934	0.14939	0.51598
GO:0055006	cardiac cell development	105	6	5.51	3560	0.14941	0.4437
GO:0010664	negative regulation of striated muscle cell apoptotic process	31	2	1.63	3199	0.14942	0.3849
GO:0005976	polysaccharide metabolic process	184	10	9.66	1659	0.14942	0.15478
GO:0001539	cilium or flagellum-dependent cell motility	36	2	1.89	3753	0.14945	0.48085
GO:0071456	cellular response to hypoxia	234	16	12.28	2278	0.14966	0.24322
GO:0006874	cellular calcium ion homeostasis	631	50	33.13	4926	0.14967	0.69092
GO:0043624	cellular protein complex disassembly	309	10	16.22	667	0.15009	0.04383
GO:0034622	cellular macromolecular complex assembly	1757	81	92.24	764	0.15067	0.05304
GO:0006401	RNA catabolic process	741	22	38.9	4095	0.15176	0.54492
GO:0042110	T cell activation	774	58	40.63	4294	0.15203	0.57977
GO:0050877	neurological system process	1837	68	96.44	4559	0.15251	0.62441
GO:0033574	response to testosterone	54	5	2.83	2766	0.15253	0.31528
GO:0008203	cholesterol metabolic process	198	16	10.39	2285	0.15363	0.24414
GO:2000249	regulation of actin cytoskeleton reorganization	53	5	2.78	243	0.15367	0.00948
GO:0003222	ventricular trabecula myocardium morphogenesis	26	3	1.36	2360	0.1538	0.25782
GO:0032012	regulation of ARF protein signal transduction	26	3	1.36	1477	0.1538	0.1343
GO:0019064	fusion of virus membrane with host plasma membrane	26	3	1.36	5045	0.1538	0.71307
GO:0006089	lactate metabolic process	26	3	1.36	2415	0.1538	0.26628
GO:0034116	positive regulation of heterotypic cell-cell adhesion	26	3	1.36	633	0.1538	0.04161
GO:0036124	histone H3-K9 trimethylation	26	3	1.36	350	0.1538	0.01636
GO:0033033	negative regulation of myeloid cell apoptotic process	26	3	1.36	285	0.1538	0.01223
GO:0015721	bile acid and bile salt transport	40	4	2.1	1080	0.1565	0.0857
GO:0060070	canonical Wnt signaling pathway	500	29	26.25	4818	0.1584	0.67076
GO:0001707	mesoderm formation	126	13	6.61	3259	0.15941	0.39587
GO:0006357	regulation of transcription from RNA polymerase II promoter	3055	197	160.38	478	0.16061	0.02579
GO:0043967	histone H4 acetylation	114	8	5.98	3047	0.16107	0.36405
GO:0010628	positive regulation of gene expression	2829	178	148.51	4136	0.1616	0.55382
GO:0007009	plasma membrane organization	461	46	24.2	4686	0.16165	0.64714
GO:0030031	cell projection assembly	657	47	34.49	860	0.1632	0.06292
GO:0072577	endothelial cell apoptotic process	84	12	4.41	607	0.16416	0.03901
GO:0060396	growth hormone receptor signaling pathway	38	8	1.99	3042	0.16446	0.36314
GO:0010594	regulation of endothelial cell migration	212	17	11.13	1927	0.16448	0.19527
GO:2001257	regulation of cation channel activity	155	14	8.14	4330	0.16448	0.58668
GO:0050706	regulation of interleukin-1 beta secretion	47	6	2.47	177	0.16492	0.00521
GO:0019941	modification-dependent protein catabolic process	1027	56	53.91	2391	0.16518	0.26244
GO:0042659	regulation of cell fate specification	25	3	1.31	2910	0.16526	0.3376
GO:2000738	positive regulation of stem cell differentiation	25	3	1.31	5158	0.16526	0.73399
GO:0010656	negative regulation of muscle cell apoptotic process	45	4	2.36	4218	0.16527	0.56573
GO:0000186	activation of MAPKK activity	86	7	4.51	4765	0.16528	0.65883
GO:0042116	macrophage activation	107	7	5.62	2822	0.16532	0.32317
GO:0006273	lagging strand elongation	14	2	0.73	5141	0.16534	0.73087
GO:0014807	regulation of somitogenesis	14	2	0.73	2998	0.16534	0.35503
GO:0003183	mitral valve morphogenesis	14	2	0.73	2841	0.16534	0.32548
GO:0045006	DNA deamination	14	2	0.73	558	0.16534	0.03386
GO:0000103	sulfate assimilation	14	2	0.73	2027	0.16534	0.20746
GO:0070561	vitamin D receptor signaling pathway	14	2	0.73	1689	0.16534	0.159
GO:2000373	positive regulation of DNA topoisomerase (ATP-hydrolyzing) activity	14	2	0.73	2082	0.16534	0.2157
GO:0035912	dorsal aorta morphogenesis	14	2	0.73	1002	0.16534	0.0772
GO:0021578	hindbrain maturation	14	2	0.73	3826	0.16534	0.49594
GO:1902855	regulation of nonmotile primary cilium assembly	14	2	0.73	3941	0.16534	0.51723
GO:0002883	regulation of hypersensitivity	14	2	0.73	537	0.16534	0.03204
GO:0002634	regulation of germinal center formation	14	2	0.73	131	0.16534	0.00328
GO:1904424	regulation of GTP binding	14	2	0.73	5433	0.16534	0.78801
GO:1901386	negative regulation of voltage-gated calcium channel activity	14	2	0.73	2469	0.16534	0.27256
GO:0090435	protein localization to nuclear envelope	14	2	0.73	4239	0.16534	0.56888
GO:0051340	regulation of ligase activity	14	2	0.73	586	0.16534	0.03713
GO:0051451	myoblast migration	14	2	0.73	3656	0.16534	0.46364
GO:0022412	cellular process involved in reproduction in multicellular organism	448	23	23.52	509	0.16568	0.0294
GO:0006809	nitric oxide biosynthetic process	120	9	6.3	3688	0.16642	0.46944
GO:0007292	female gamete generation	174	11	9.13	1261	0.16662	0.10923
GO:0030207	chondroitin sulfate catabolic process	27	3	1.42	3773	0.16669	0.48374
GO:0030728	ovulation	27	3	1.42	2344	0.16669	0.25607
GO:0090141	positive regulation of mitochondrial fission	27	3	1.42	3425	0.16669	0.42289
GO:0030511	positive regulation of transforming growth factor beta receptor signaling pathway	41	4	2.15	2270	0.1667	0.24137
GO:0051491	positive regulation of filopodium assembly	41	4	2.15	3217	0.1667	0.38783
GO:0010608	posttranscriptional regulation of gene expression	854	42	44.83	800	0.16781	0.05686
GO:0048662	negative regulation of smooth muscle cell proliferation	71	6	3.73	3651	0.16966	0.46233
GO:0071347	cellular response to interleukin-1	133	10	6.98	597	0.17337	0.03821
GO:0009267	cellular response to starvation	182	11	9.55	2197	0.1741	0.23101
GO:0045600	positive regulation of fat cell differentiation	88	9	4.62	191	0.17543	0.00593
GO:0050709	negative regulation of protein secretion	185	15	9.71	1312	0.17605	0.1138
GO:0038083	peptidyl-tyrosine autophosphorylation	82	7	4.3	1579	0.1761	0.14421
GO:0032435	negative regulation of proteasomal ubiquitin-dependent protein catabolic process	42	4	2.2	1050	0.17714	0.08168
GO:0043044	ATP-dependent chromatin remodeling	128	6	6.72	872	0.17792	0.06371
GO:0000732	strand displacement	57	5	2.99	2388	0.1786	0.26151
GO:0060173	limb development	286	12	15.01	844	0.17864	0.061
GO:1900006	positive regulation of dendrite development	116	10	6.09	1943	0.17926	0.19671
GO:0048821	erythrocyte development	46	4	2.41	634	0.17987	0.04164
GO:0030968	endoplasmic reticulum unfolded protein response	201	9	10.55	4080	0.17988	0.54285
GO:0060716	labyrinthine layer blood vessel development	28	3	1.47	1912	0.17988	0.19281
GO:0006978	DNA damage response, signal transduction by p53 class mediator resulting in transcription of p21 cla...	28	3	1.47	2361	0.17988	0.25786
GO:0071380	cellular response to prostaglandin E stimulus	28	3	1.47	1381	0.17988	0.12408
GO:0046888	negative regulation of hormone secretion	90	5	4.72	3154	0.18021	0.37813
GO:0090002	establishment of protein localization to plasma membrane	243	23	12.76	1124	0.18088	0.09198
[truncated: 7,080 more rows]

## Sheet: POSLiu.adjArraySexRaceSiteCell
GO.ID	Term	Annotated	Significant	Expected	Rank in ks_weight01	fisher_weight01	ks_weight01
[truncated: 7,977 more rows]
